# Supplementary figures and images for: Elemental analysis by Metallobalance provides a complementary support layer over existing blood biochemistry panel-based cancer risk assessment
Source: PeerJ journal article supplement (doi:10.7717/peerj.12247), 2021-10-04

In\_Na

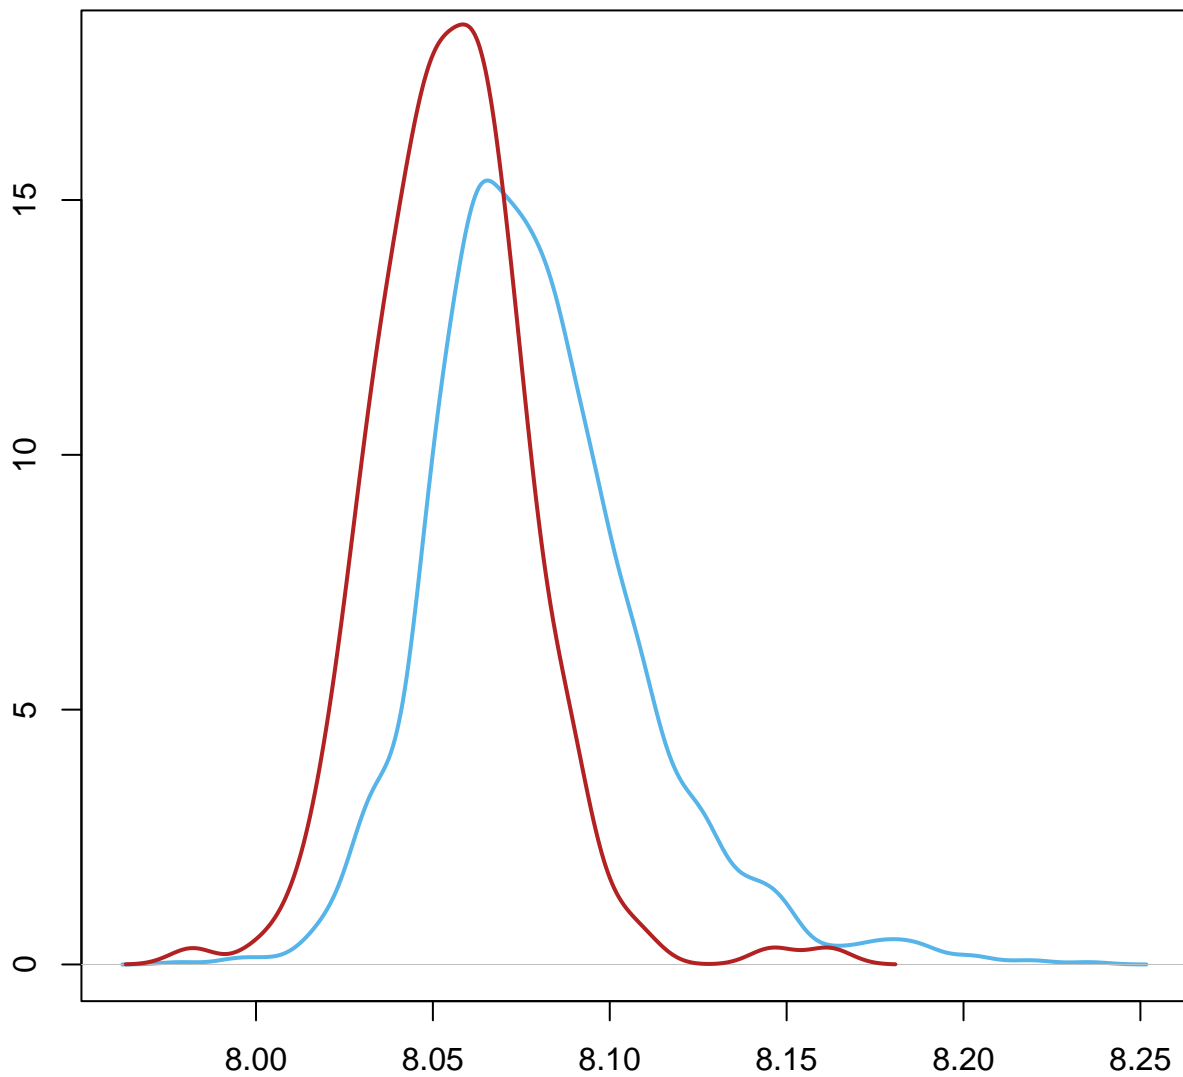

ln\_Mg

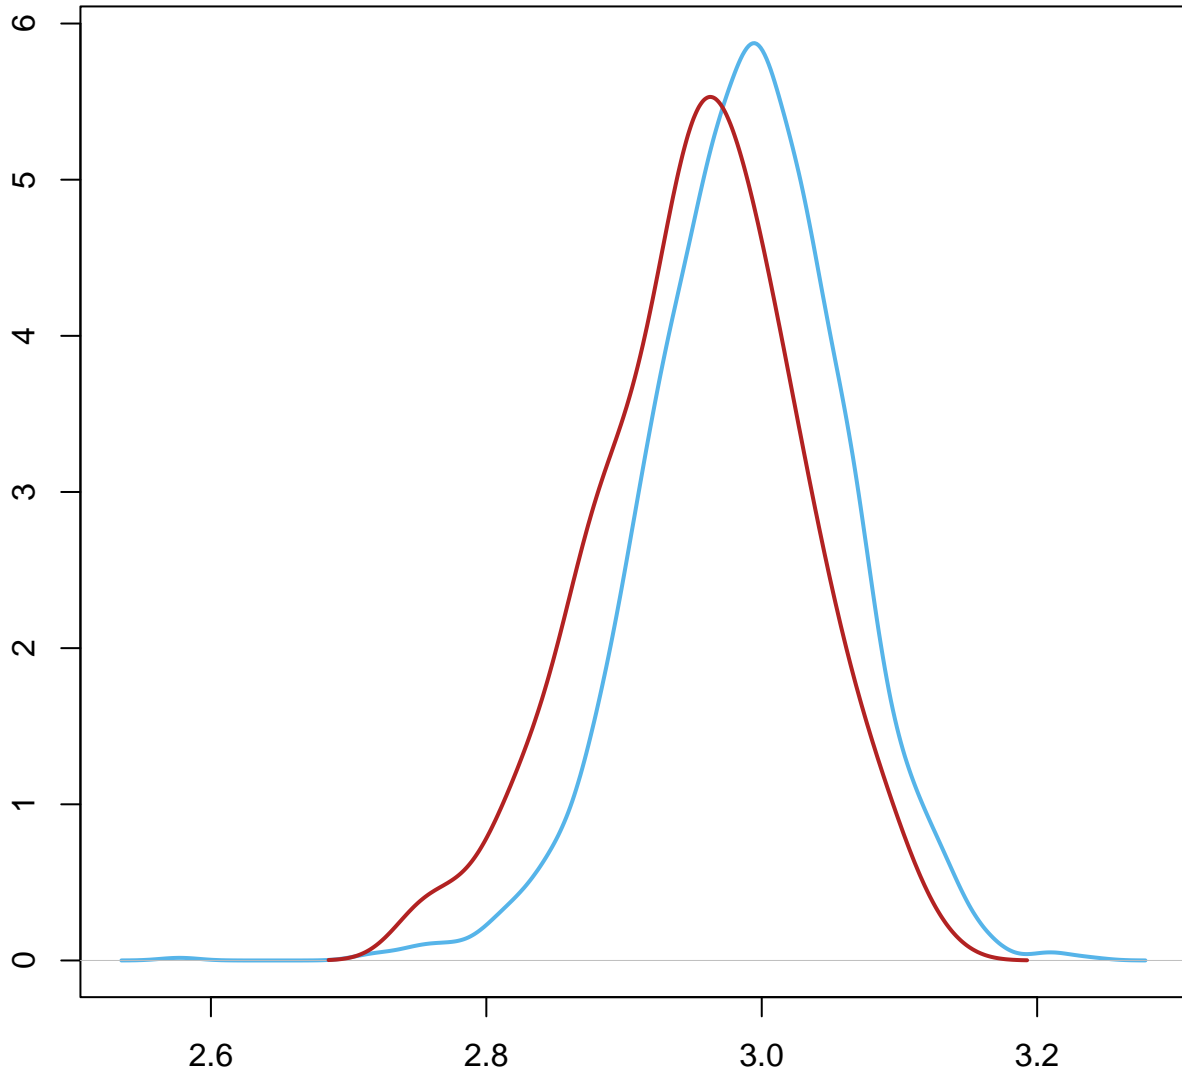

ln\_P

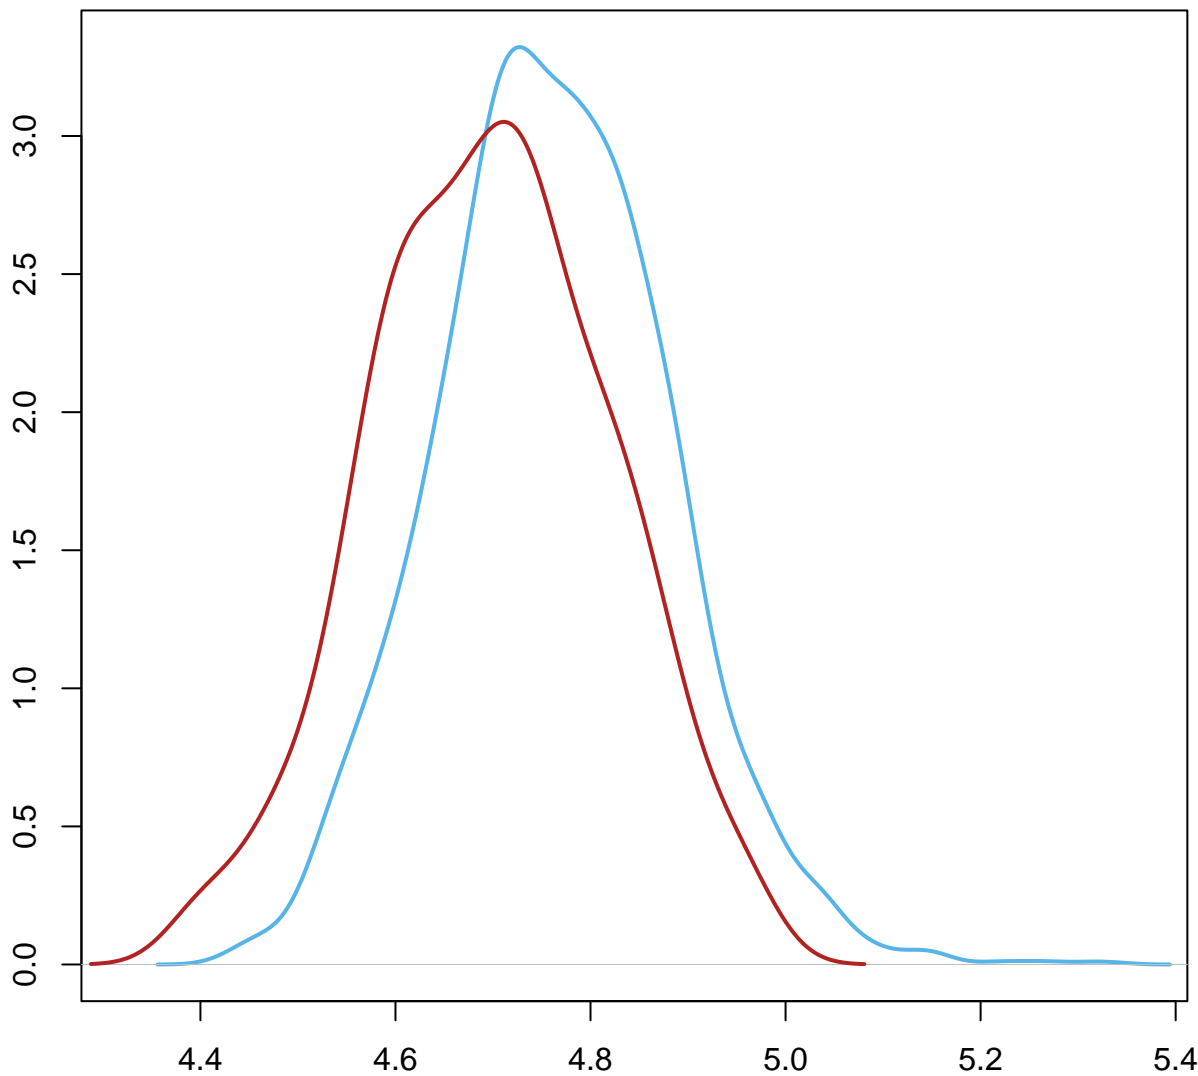

ln\_S

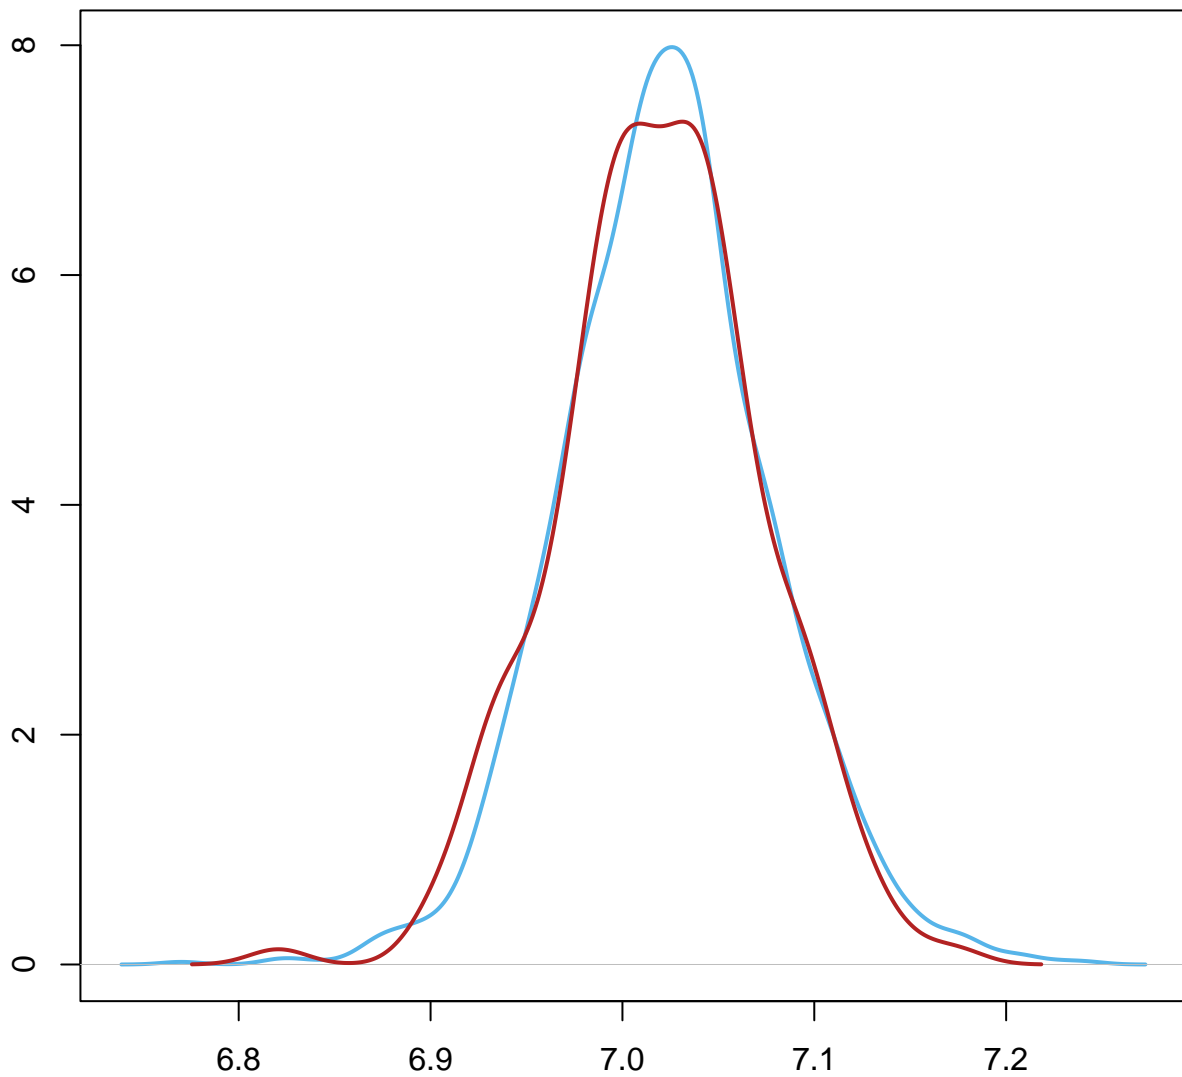

ln\_K

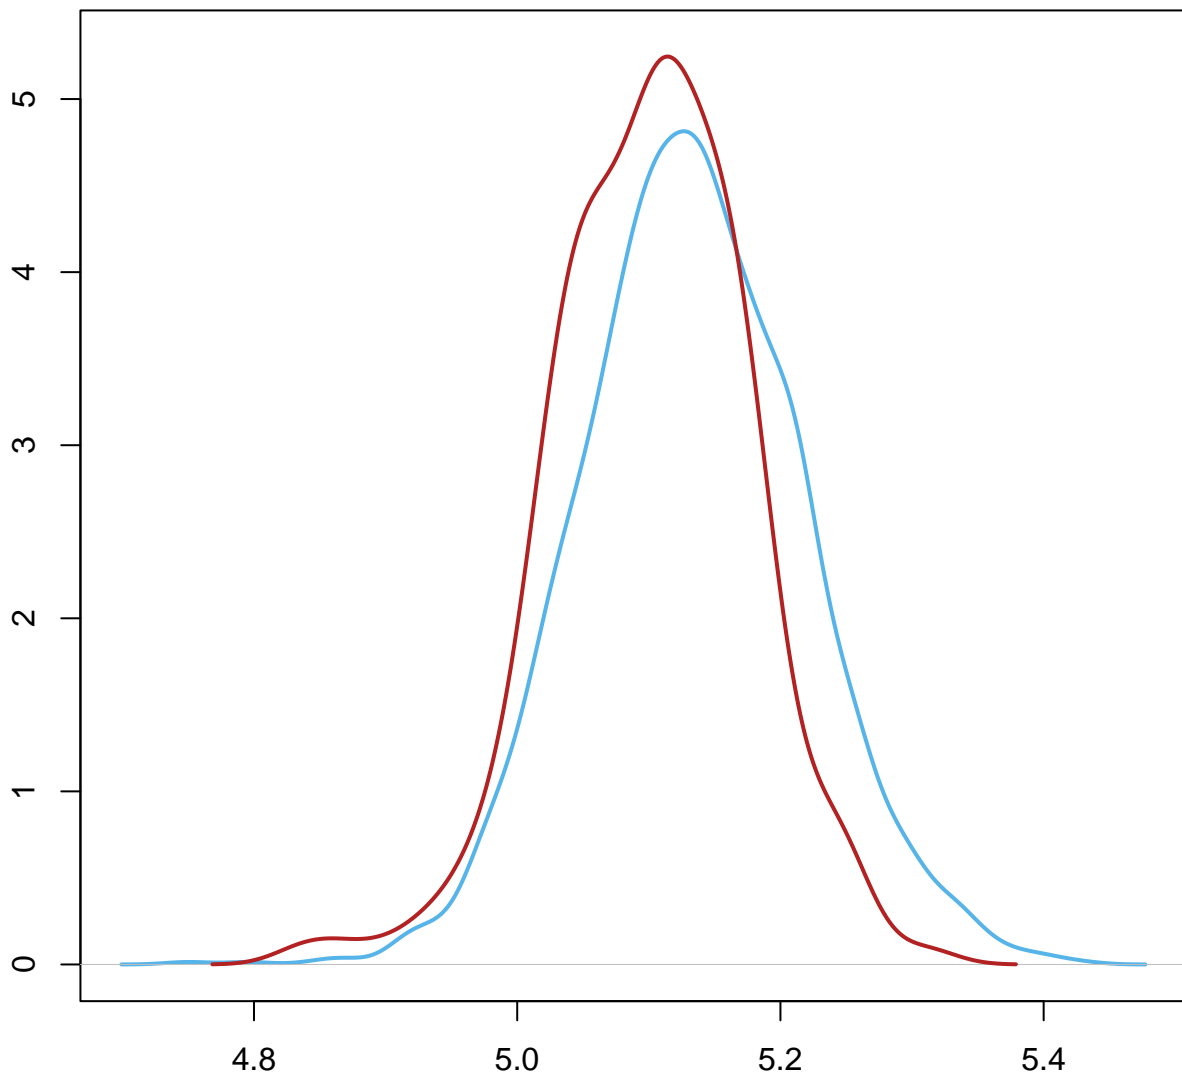

In\_Ca

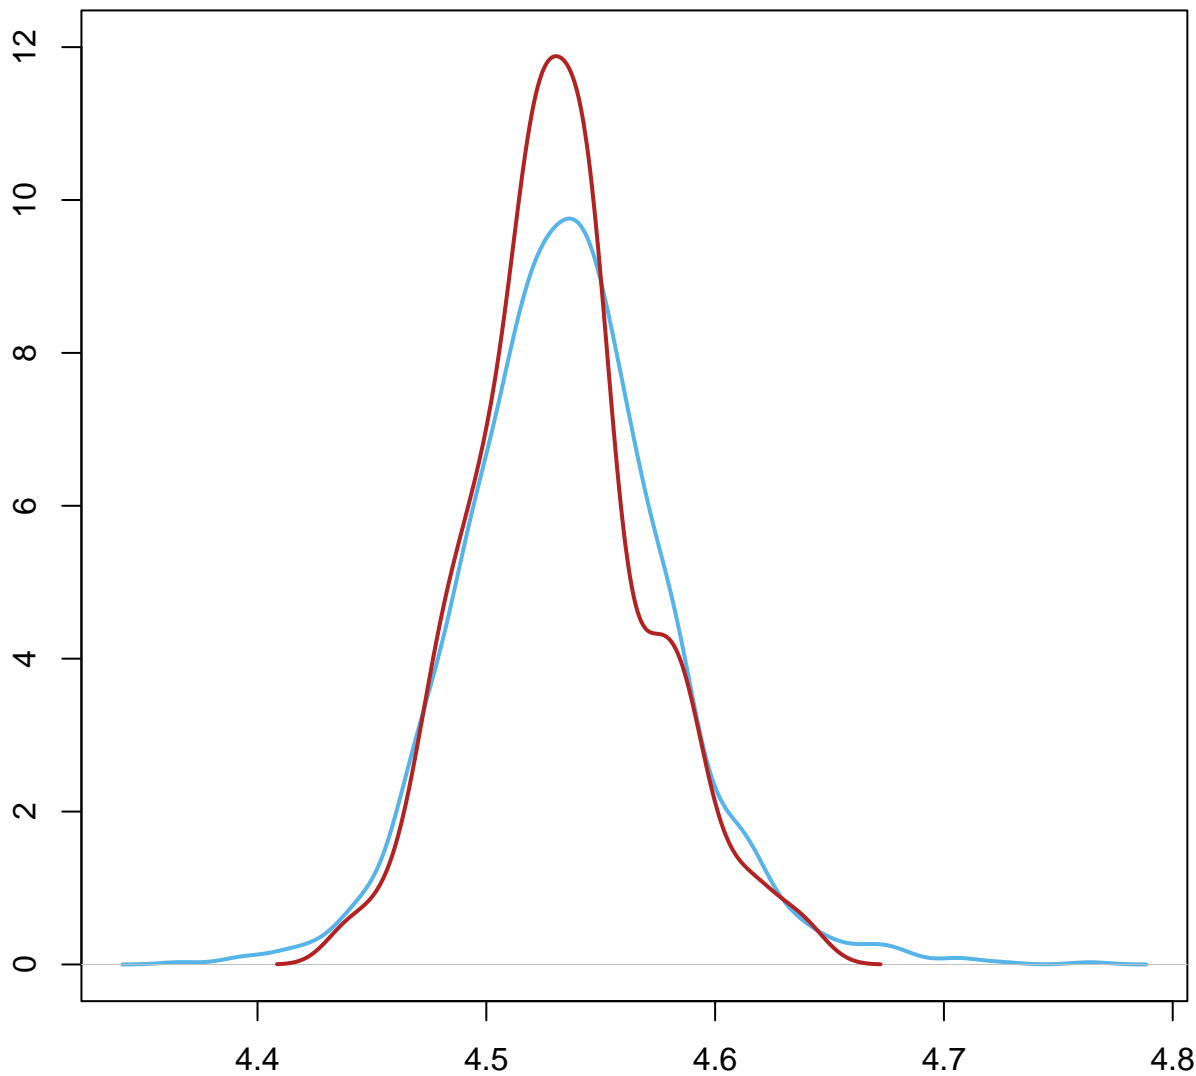

**In\_Fe**

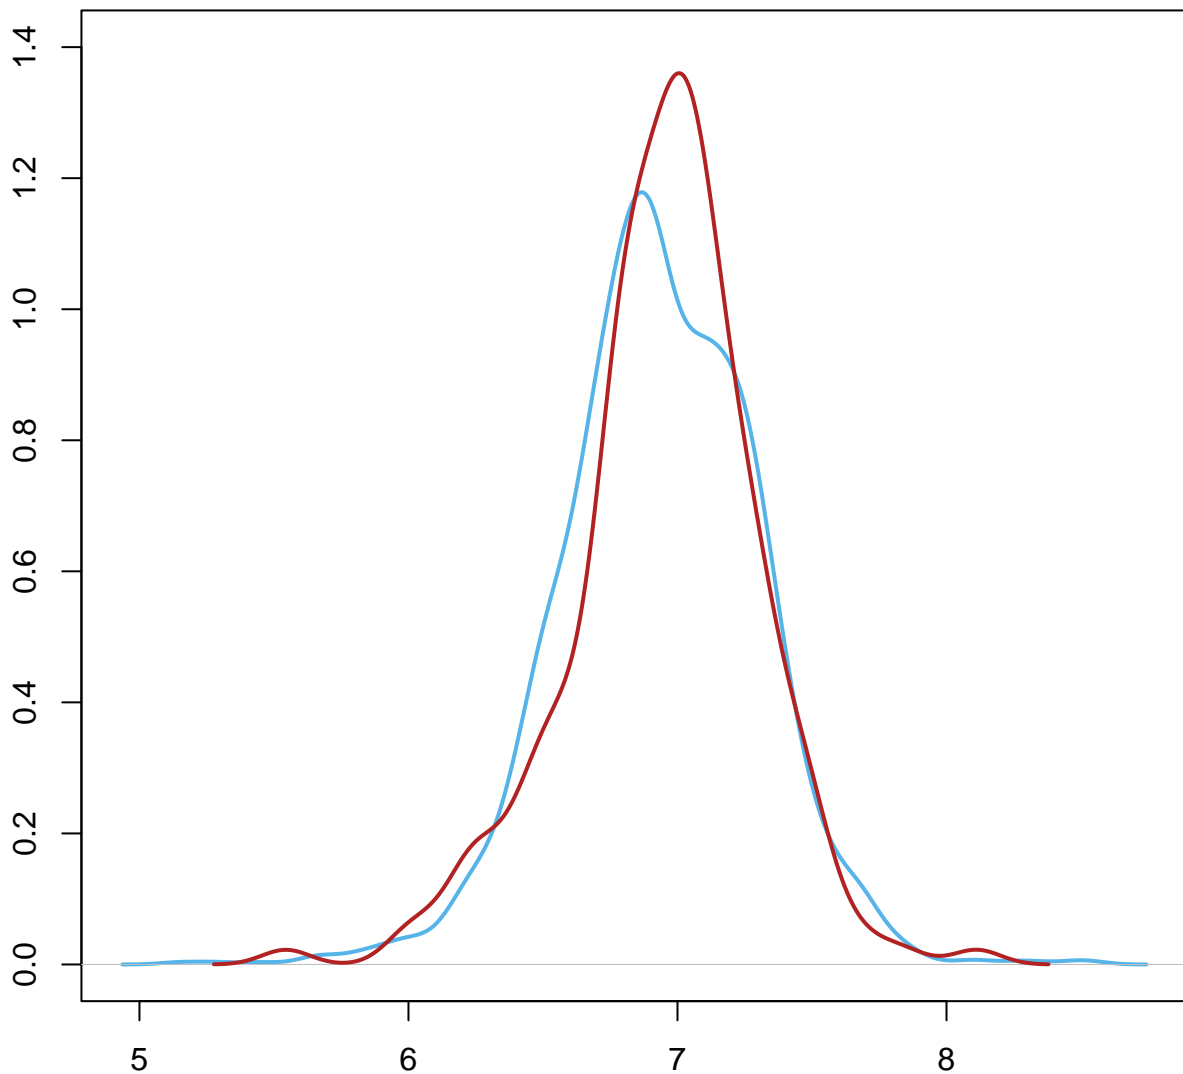

In\_Co

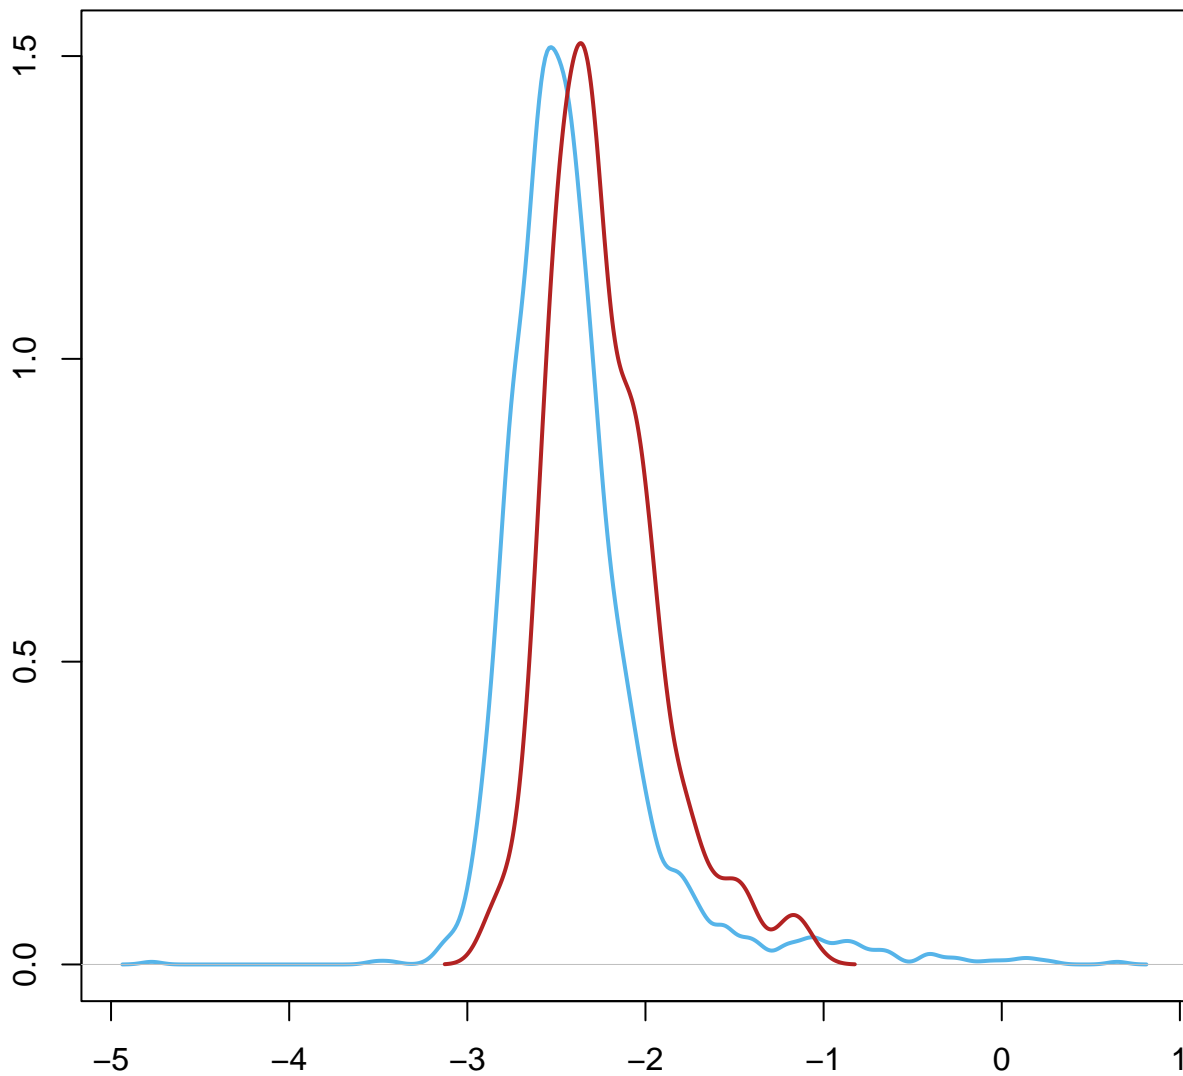



In\_Cu

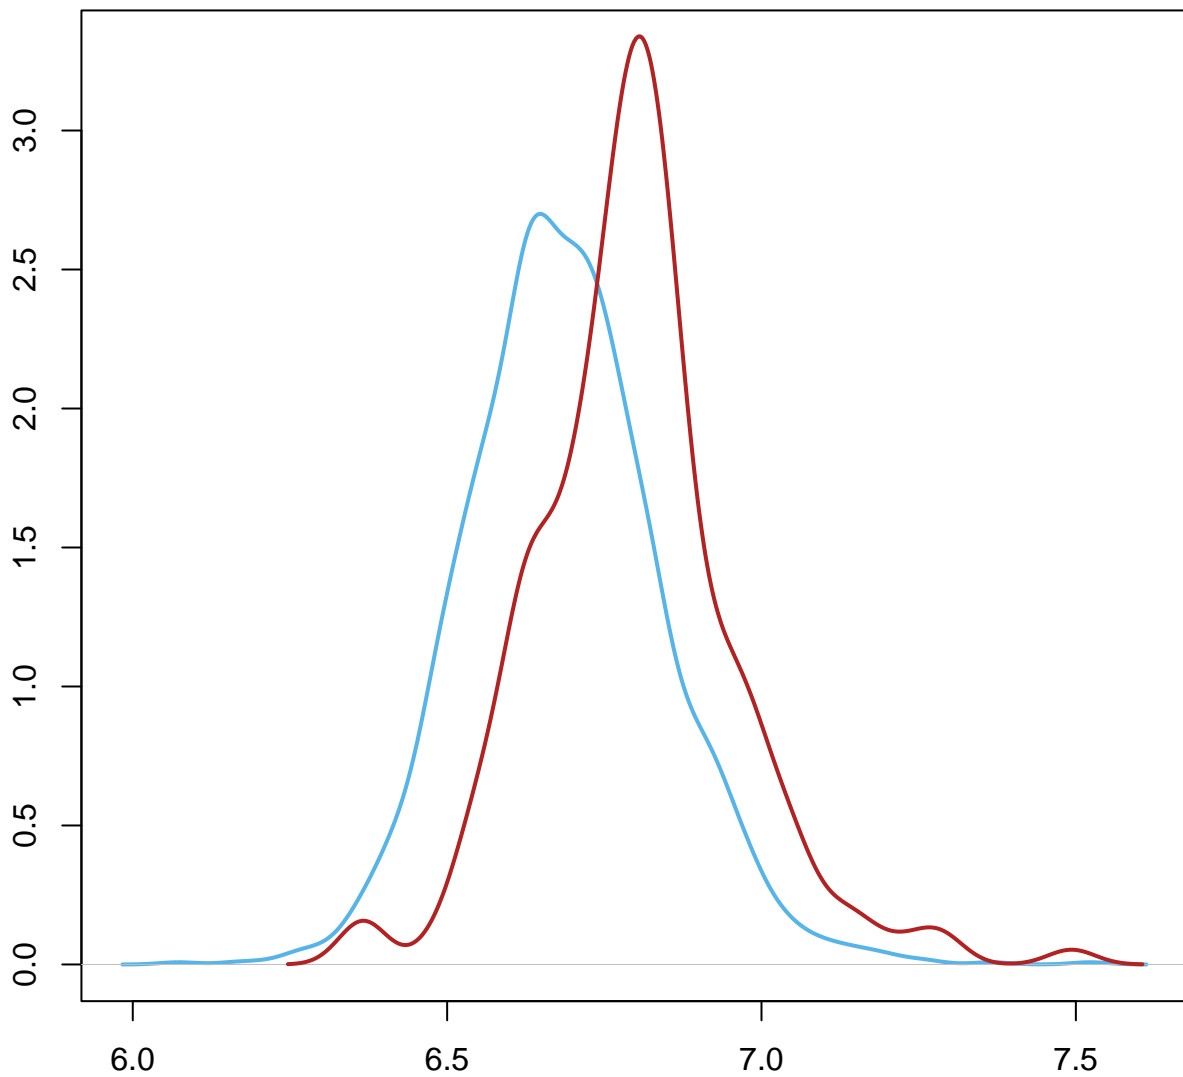

ln\_Zn

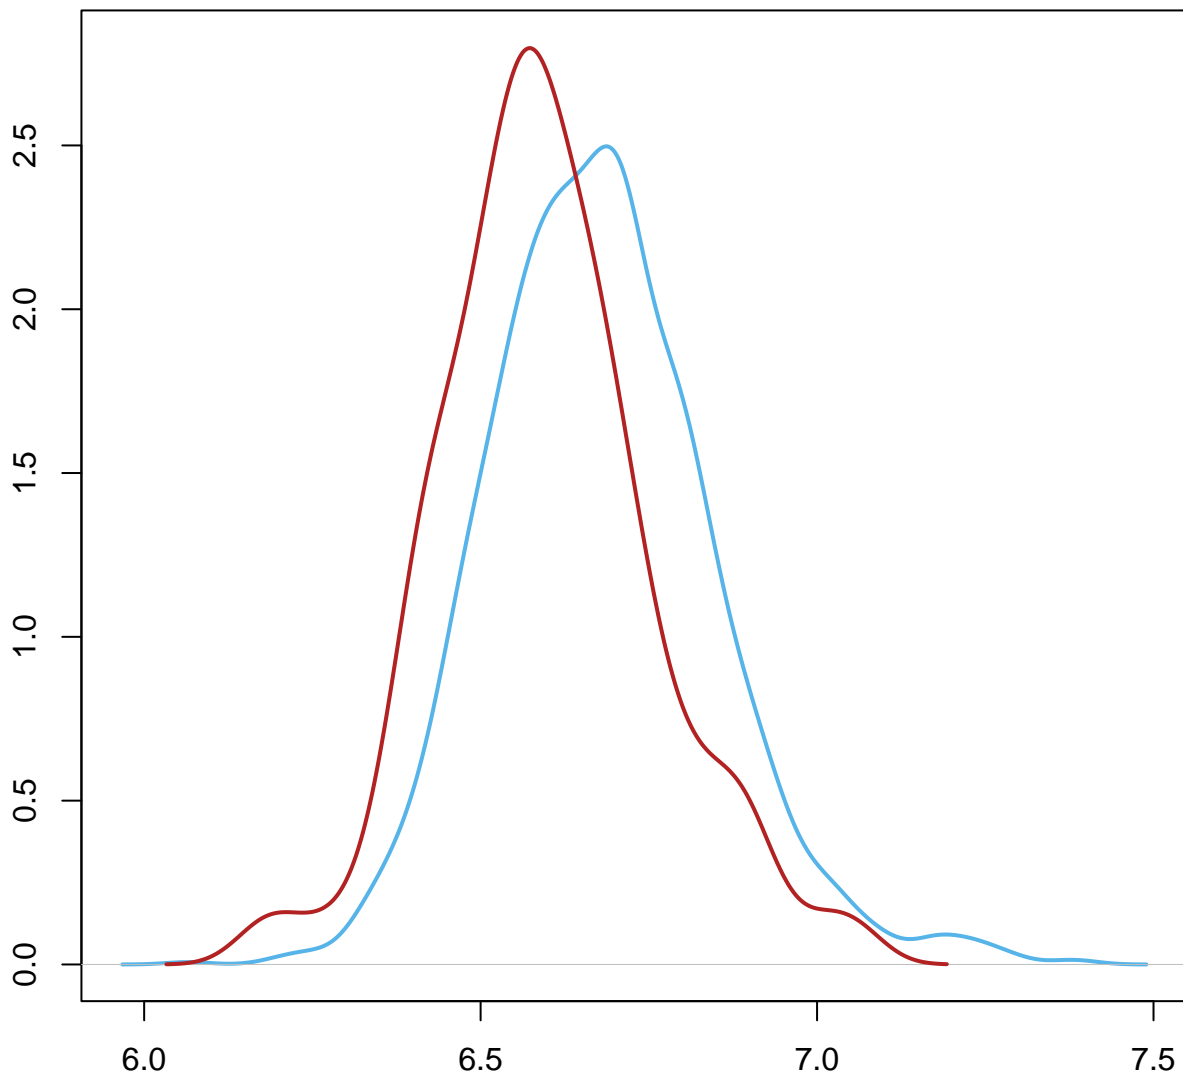

ln\_As

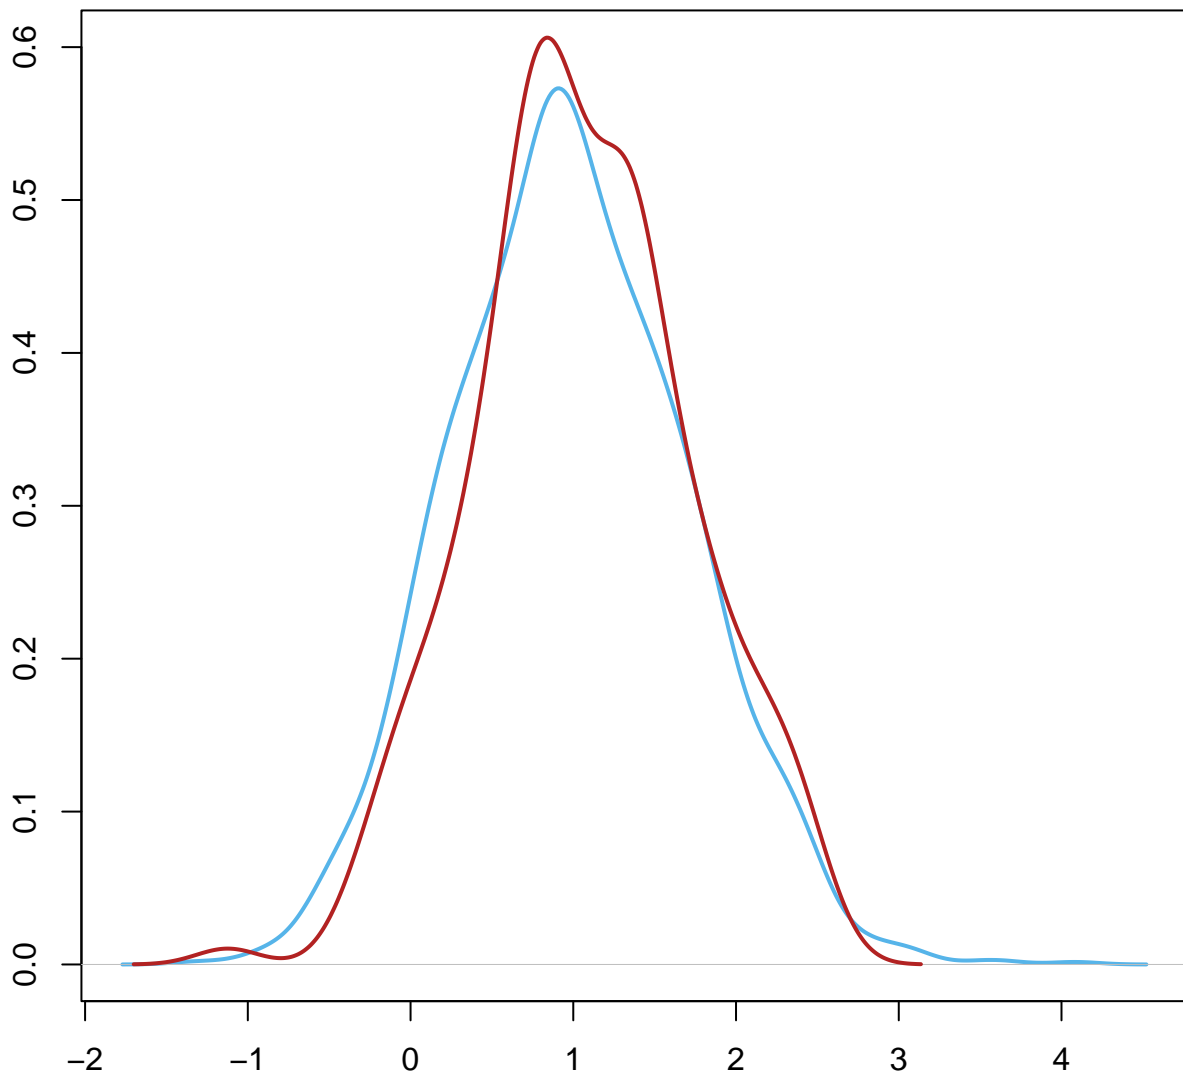

In\_Se

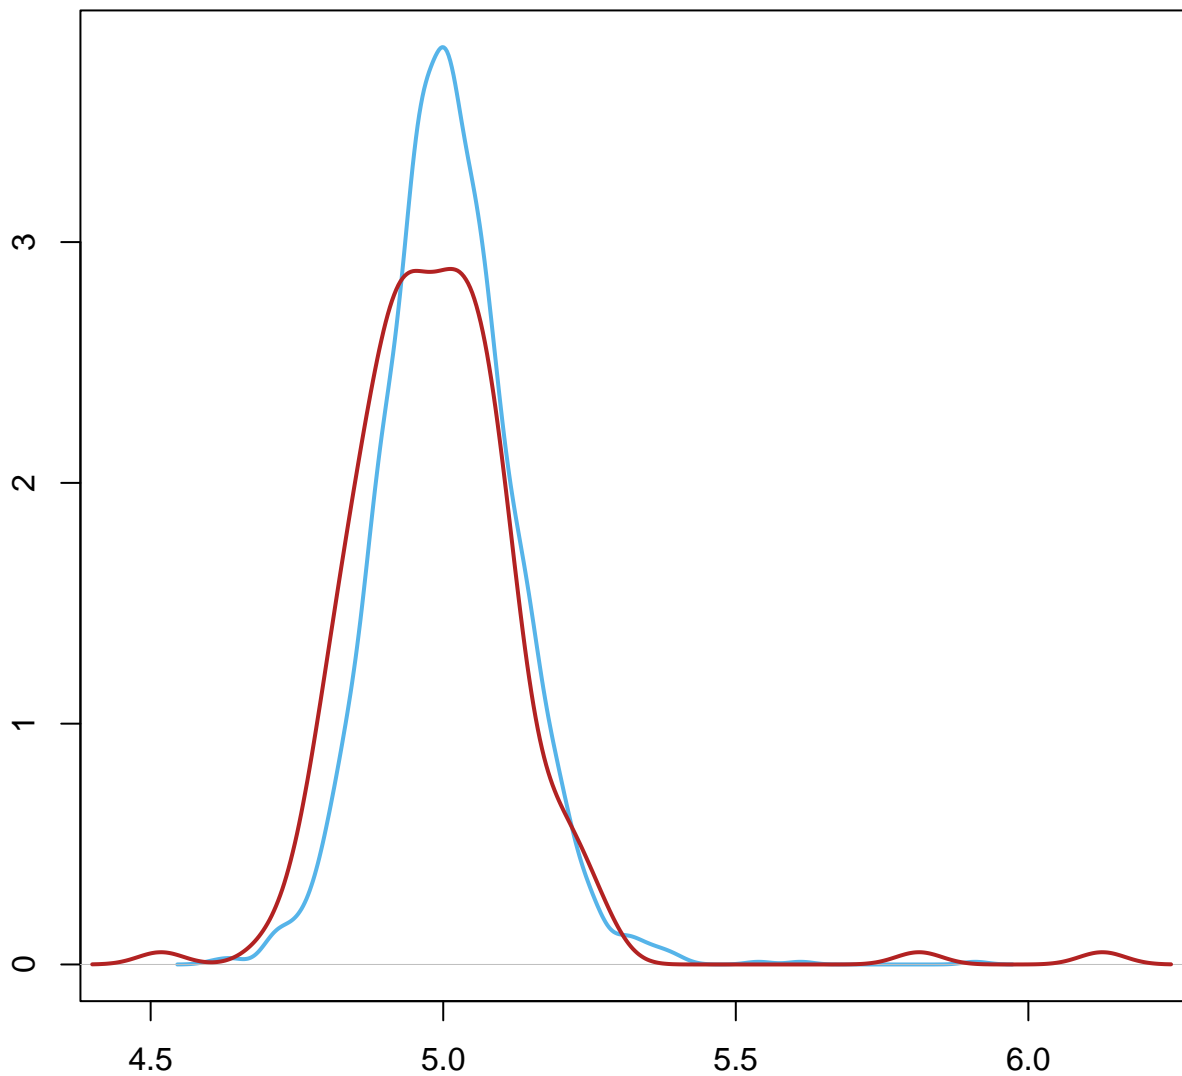

**ln\_Rb**

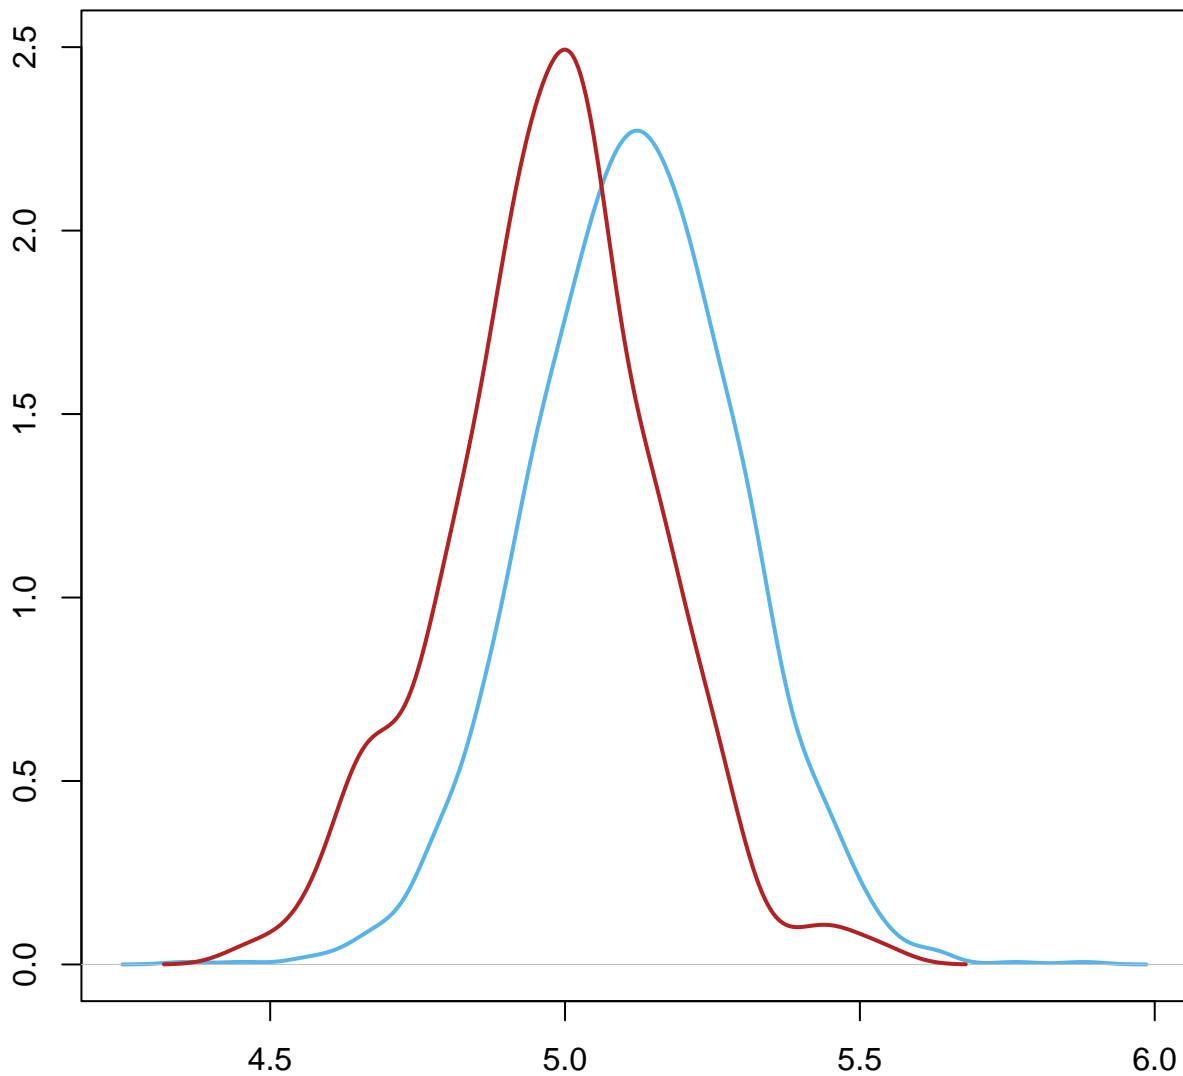

ln\_Sr

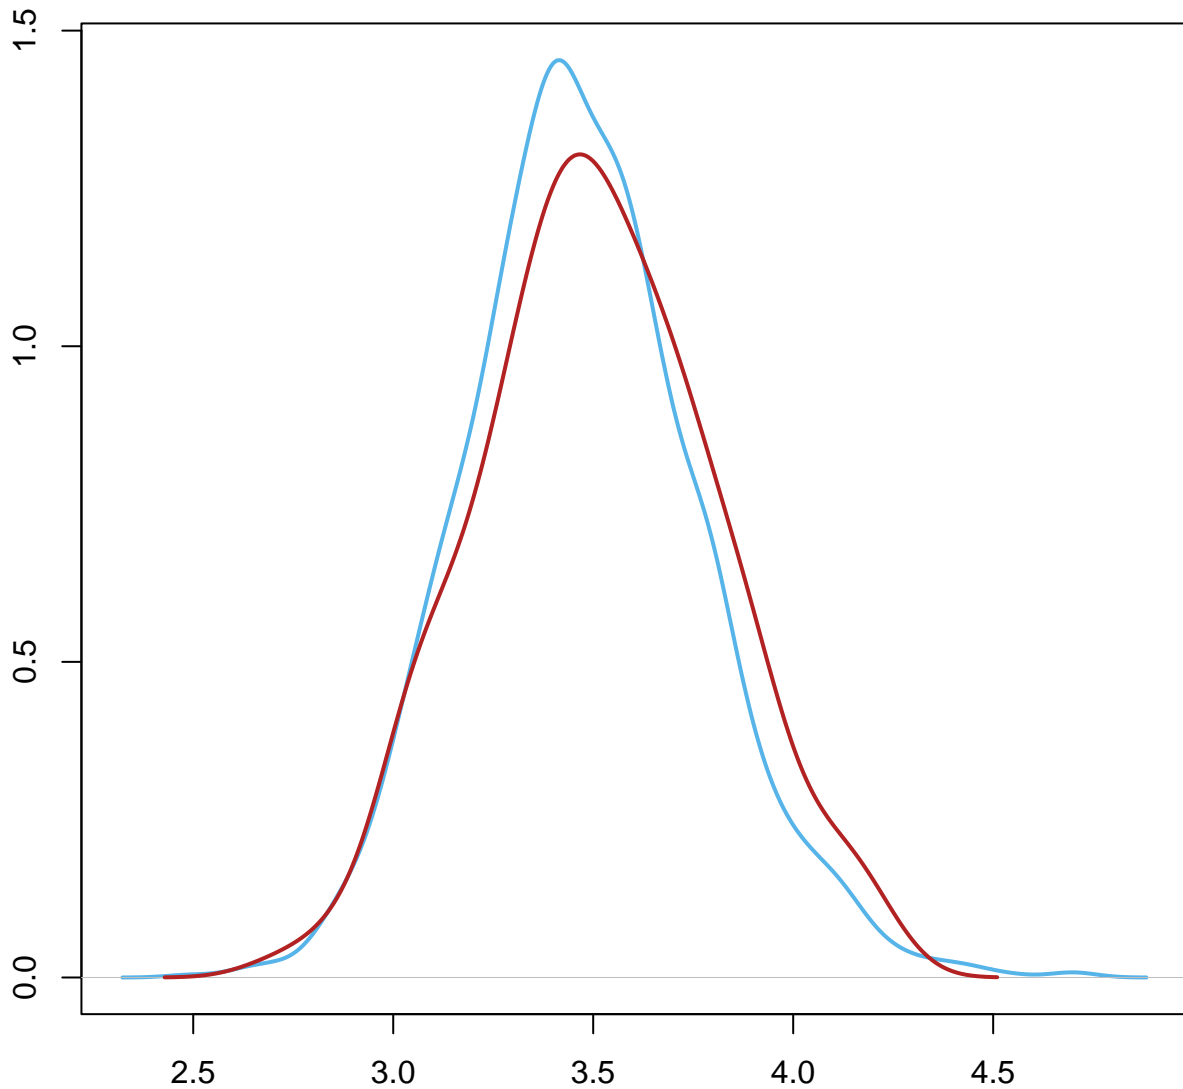

In\_Mo

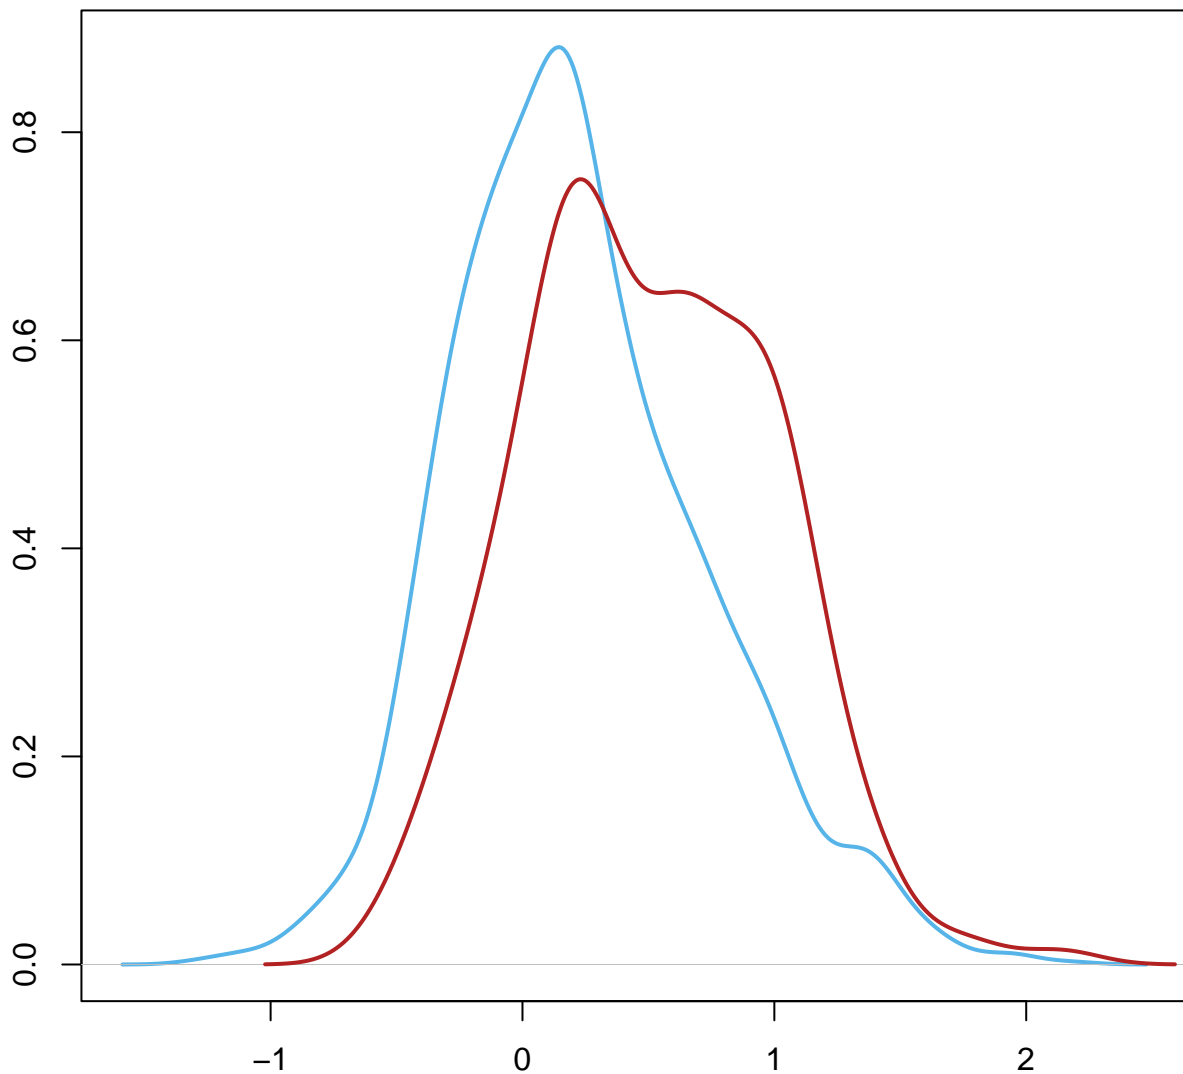

**In\_Ag**

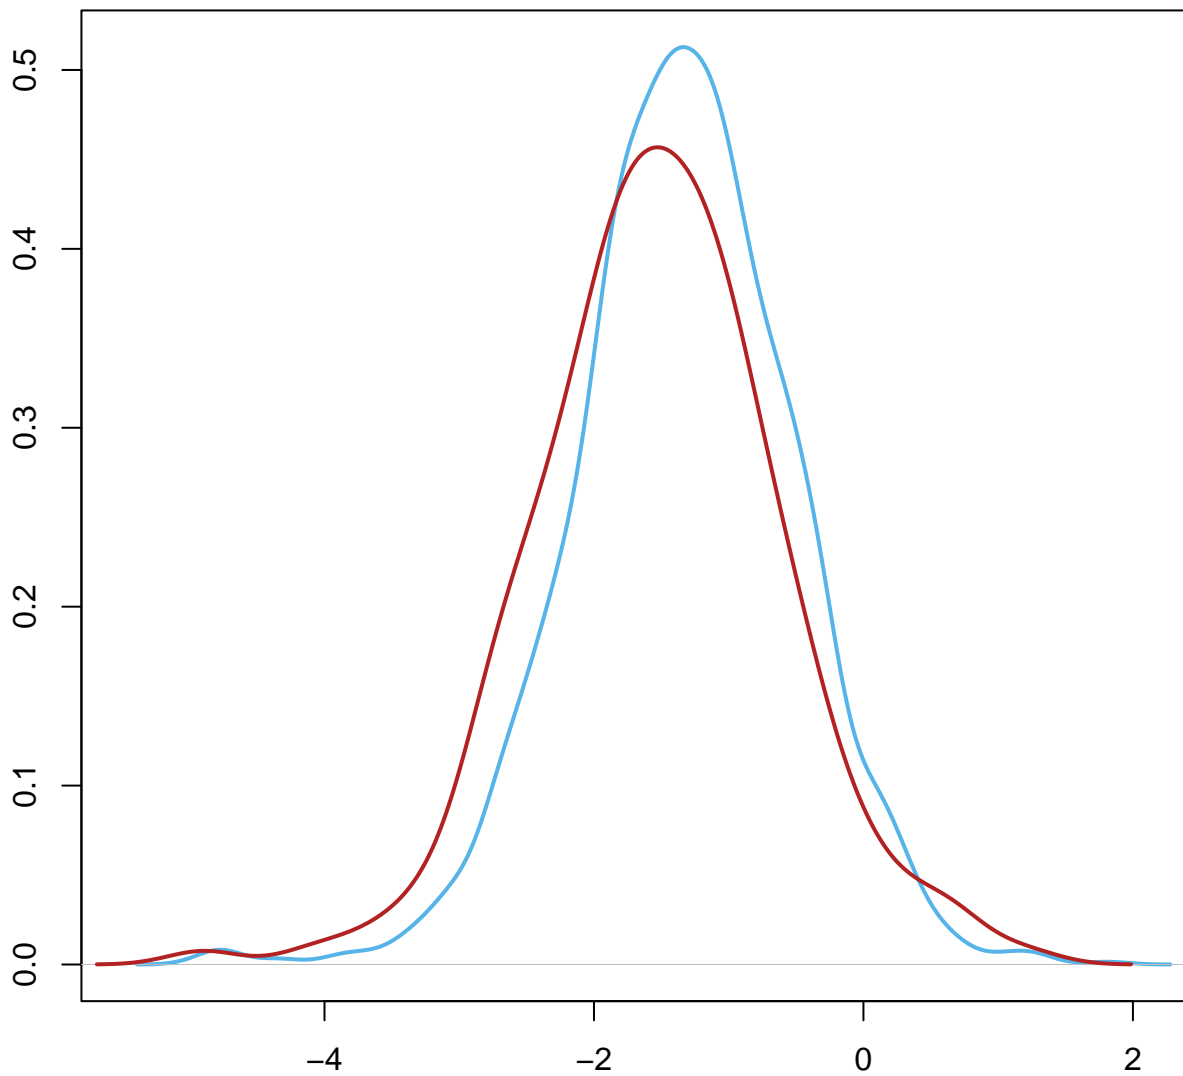



**ln\_Cs**

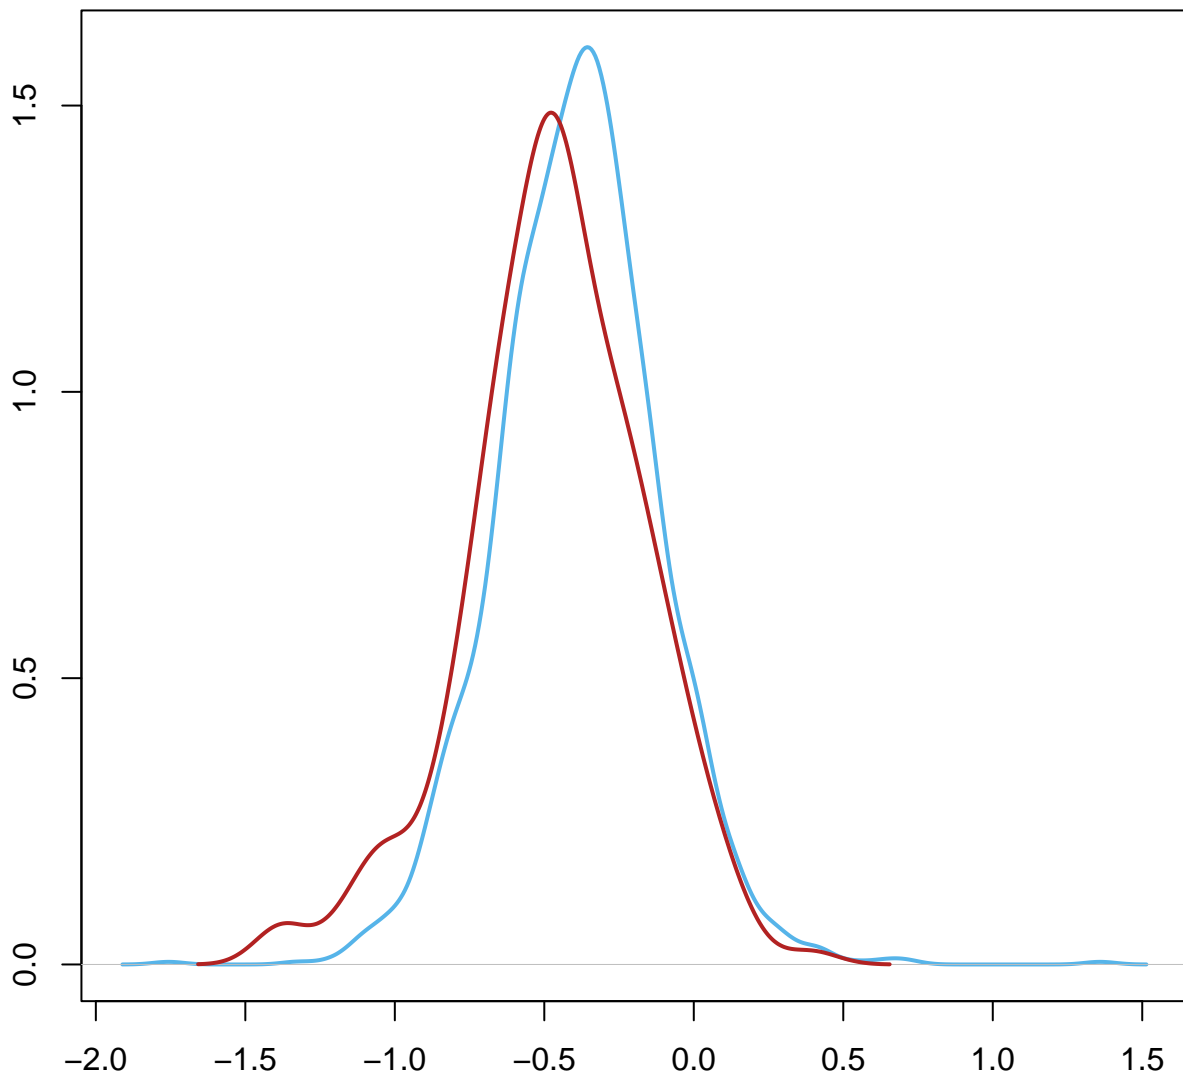

Supplement: Supporting_Figure_1.zip [file Supporting_Figure_1.zip]

In\_Na

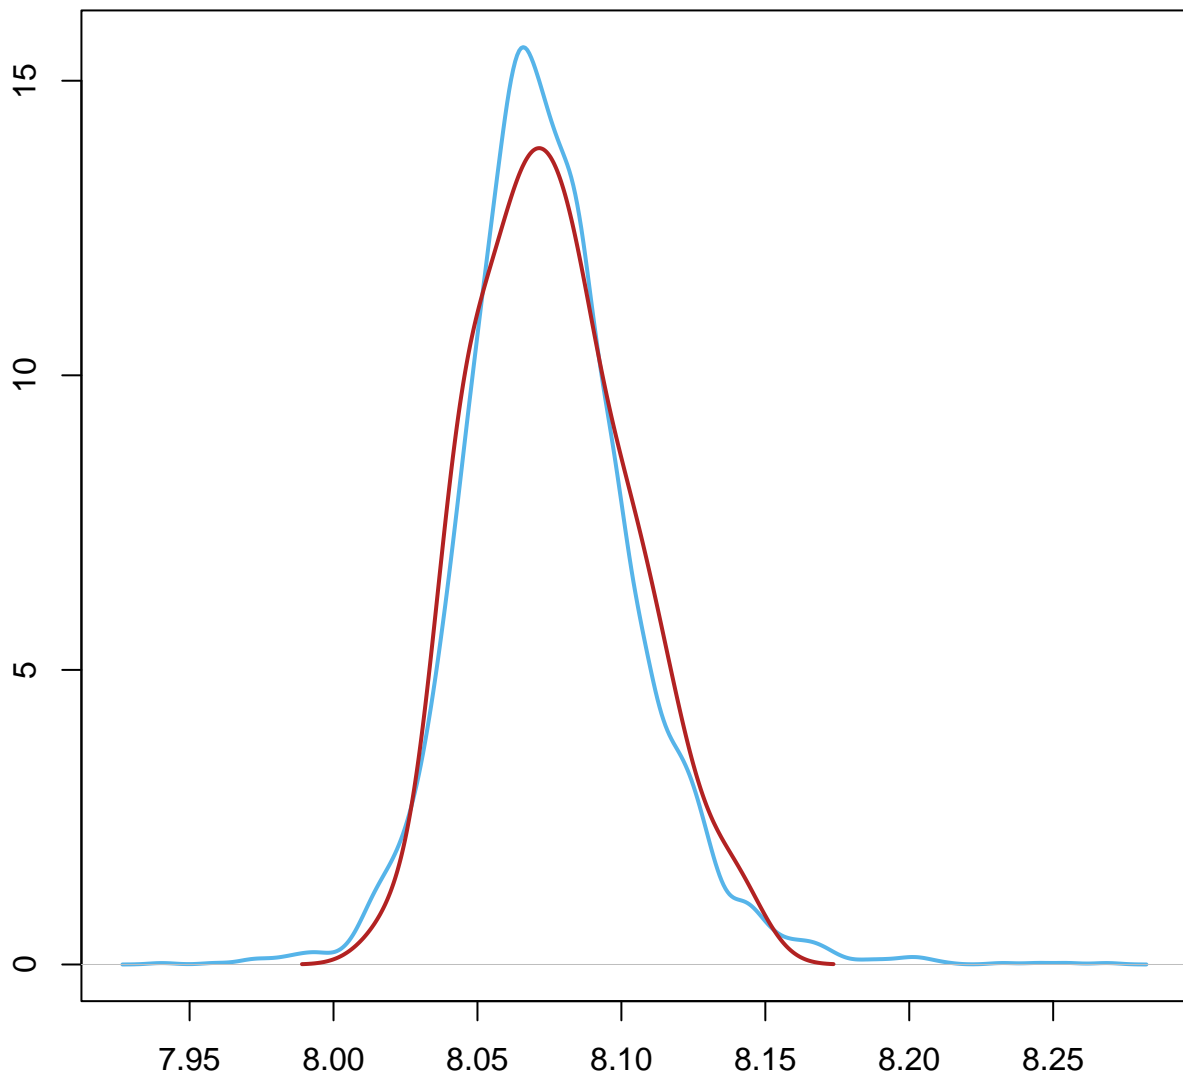

ln\_Mg

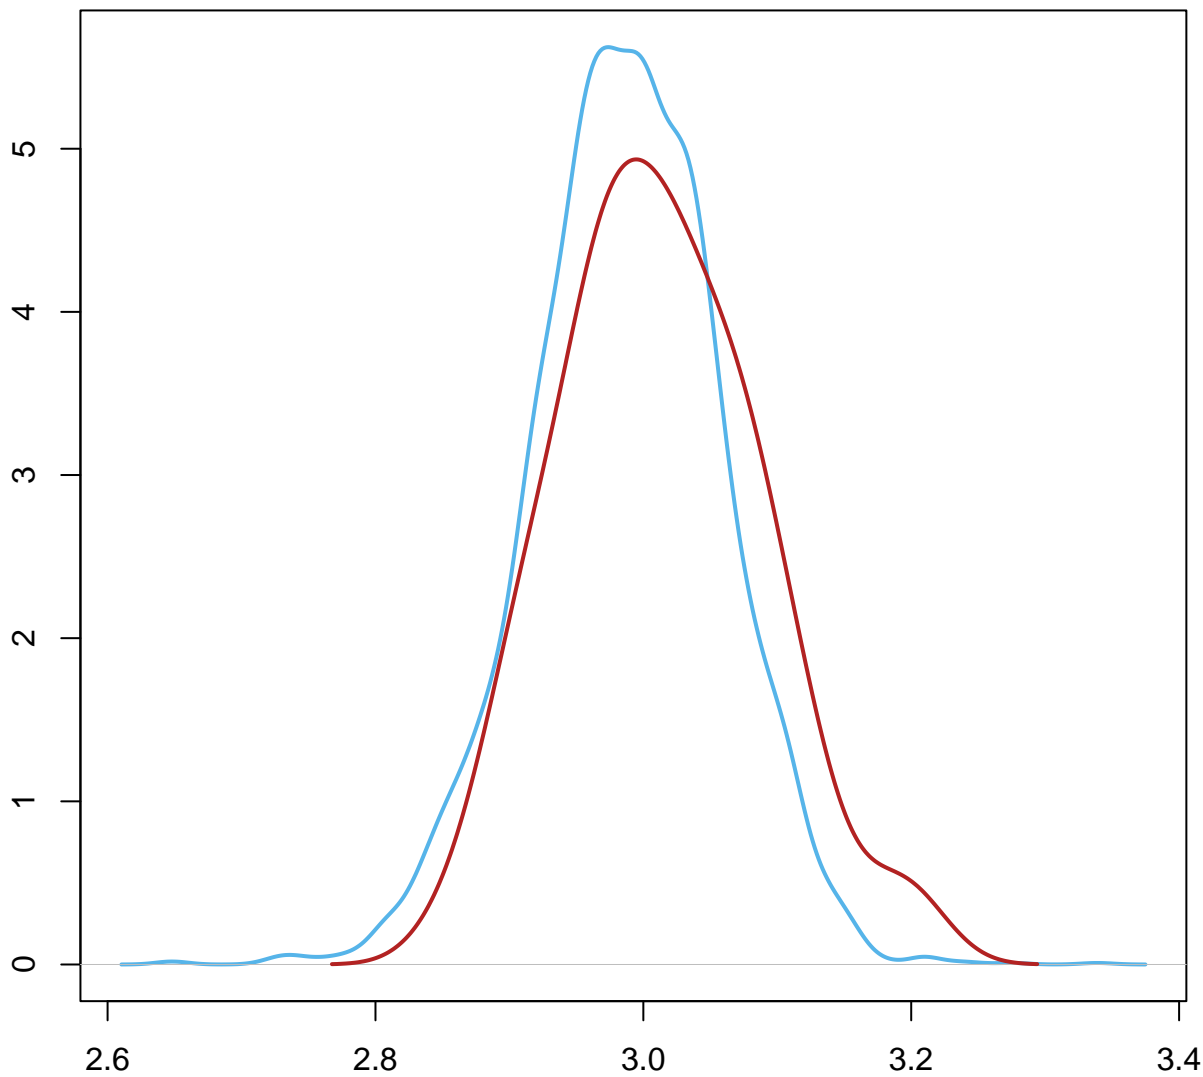

ln\_P

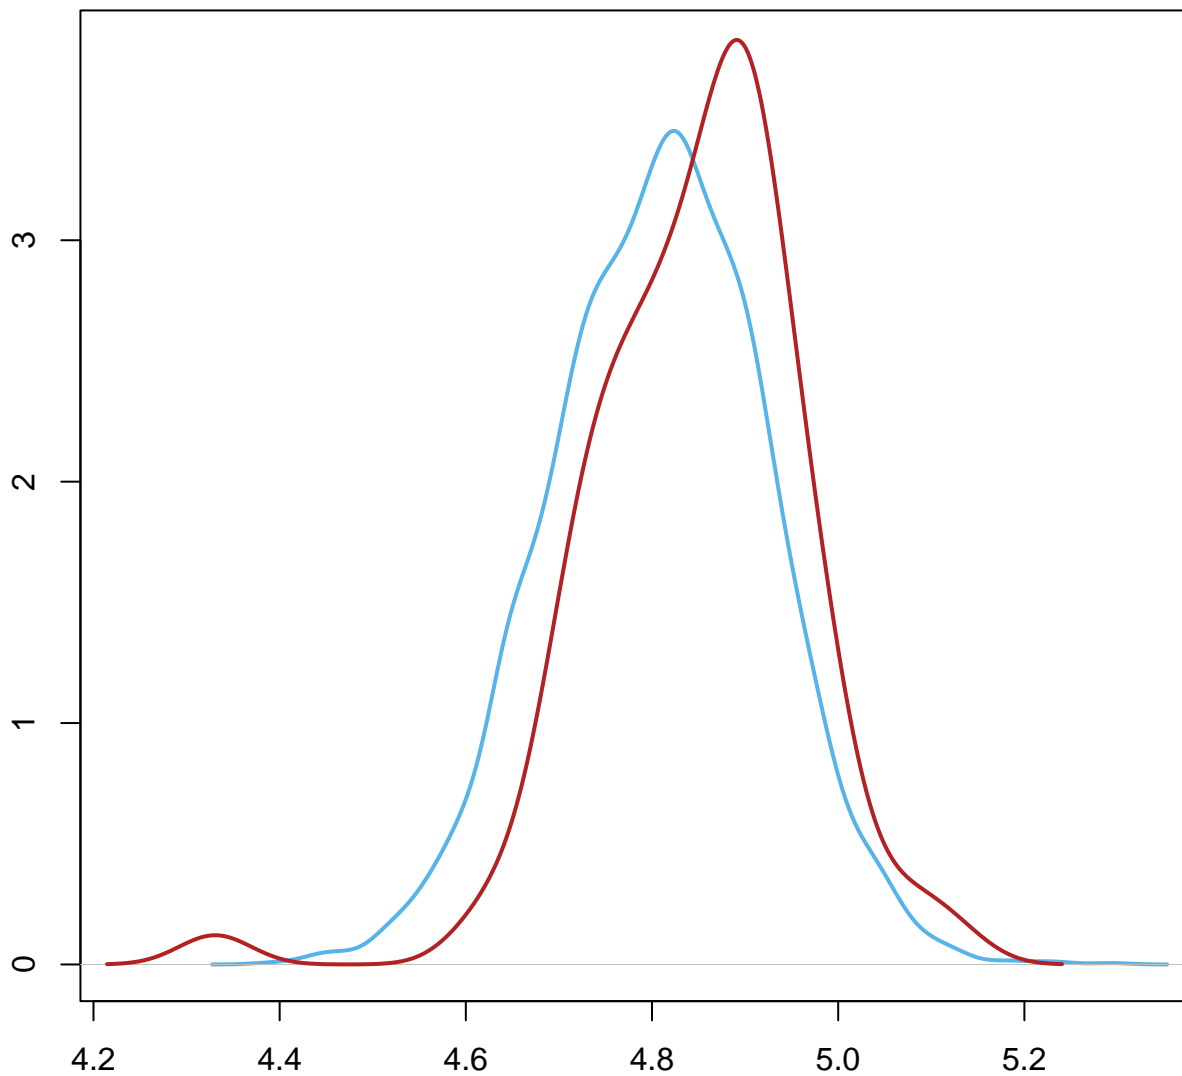

ln\_S

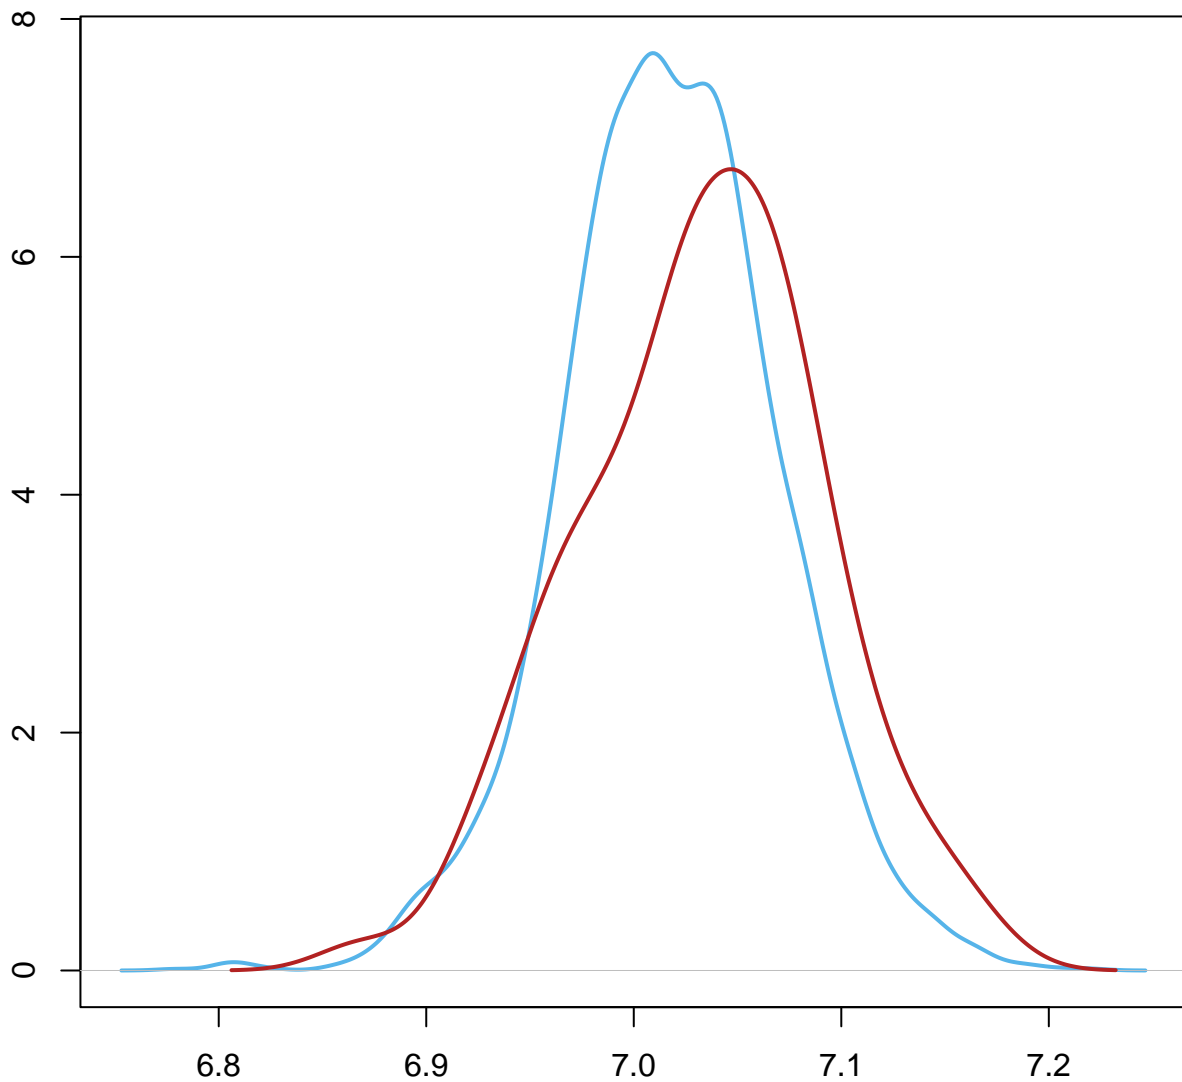

ln\_K

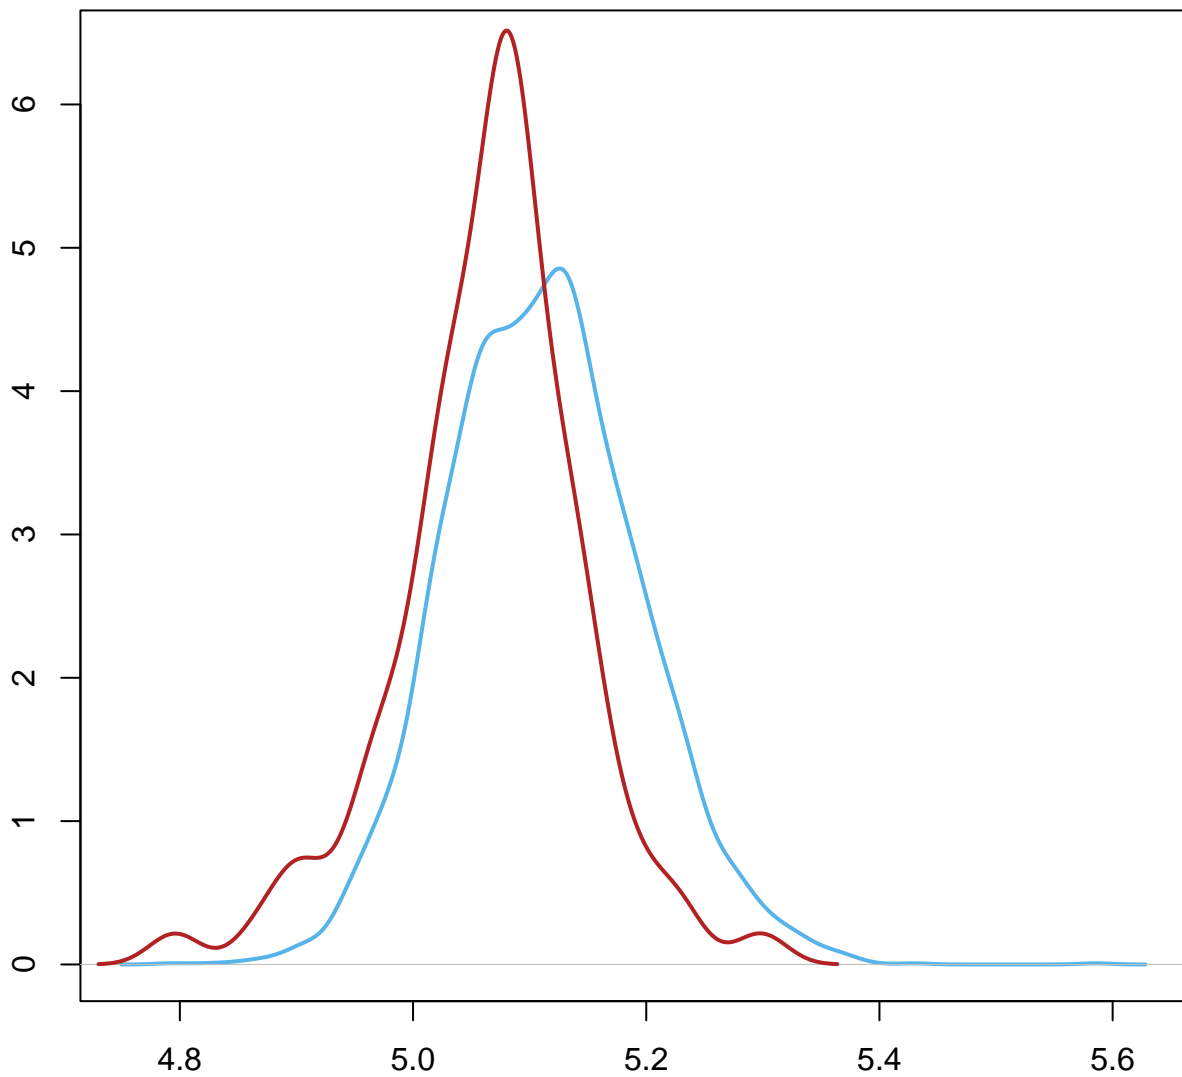

In\_Ca

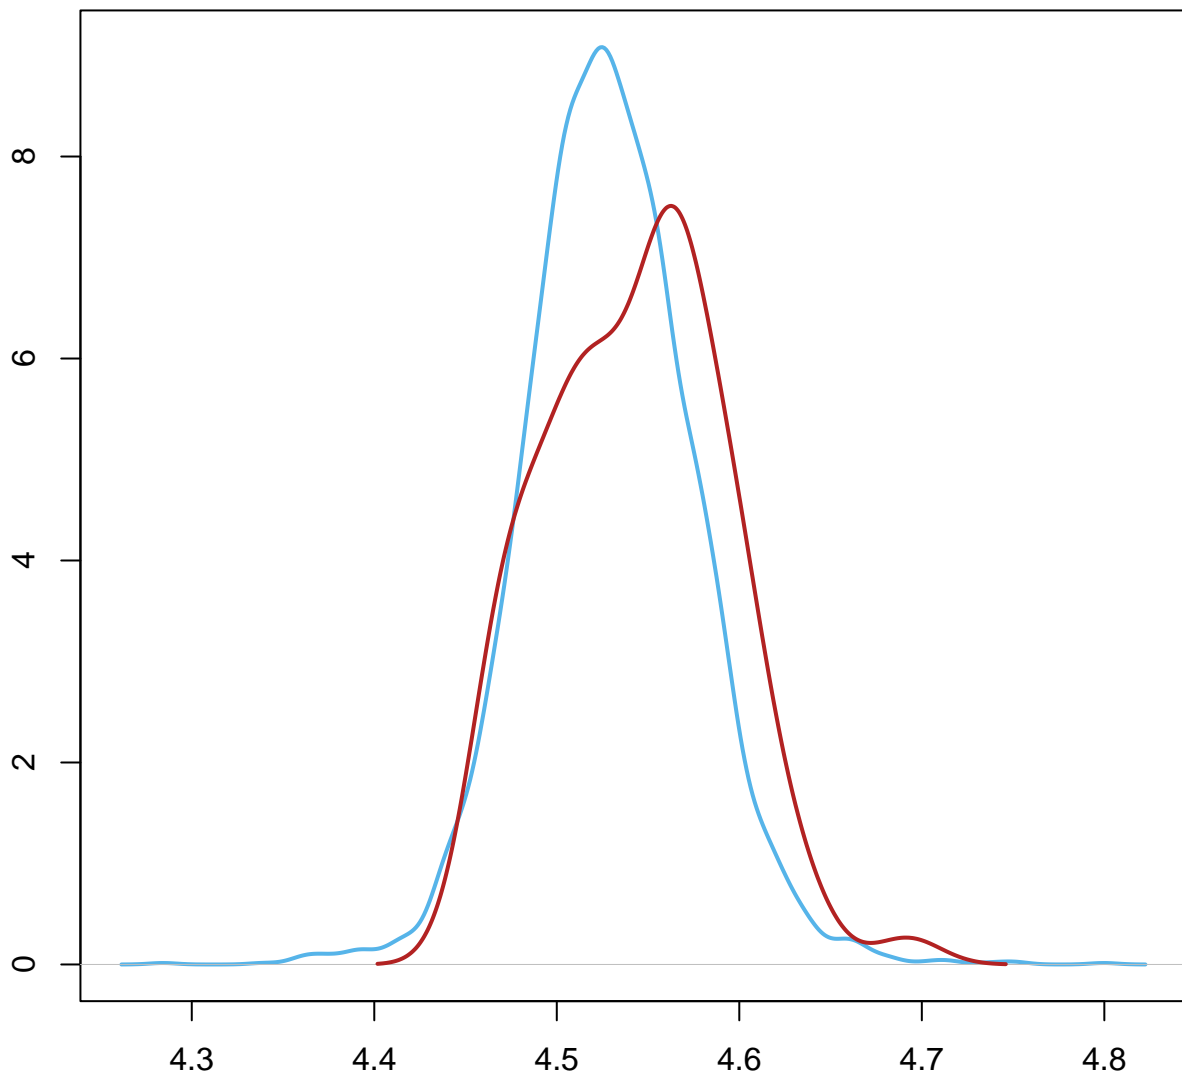

In\_Fe

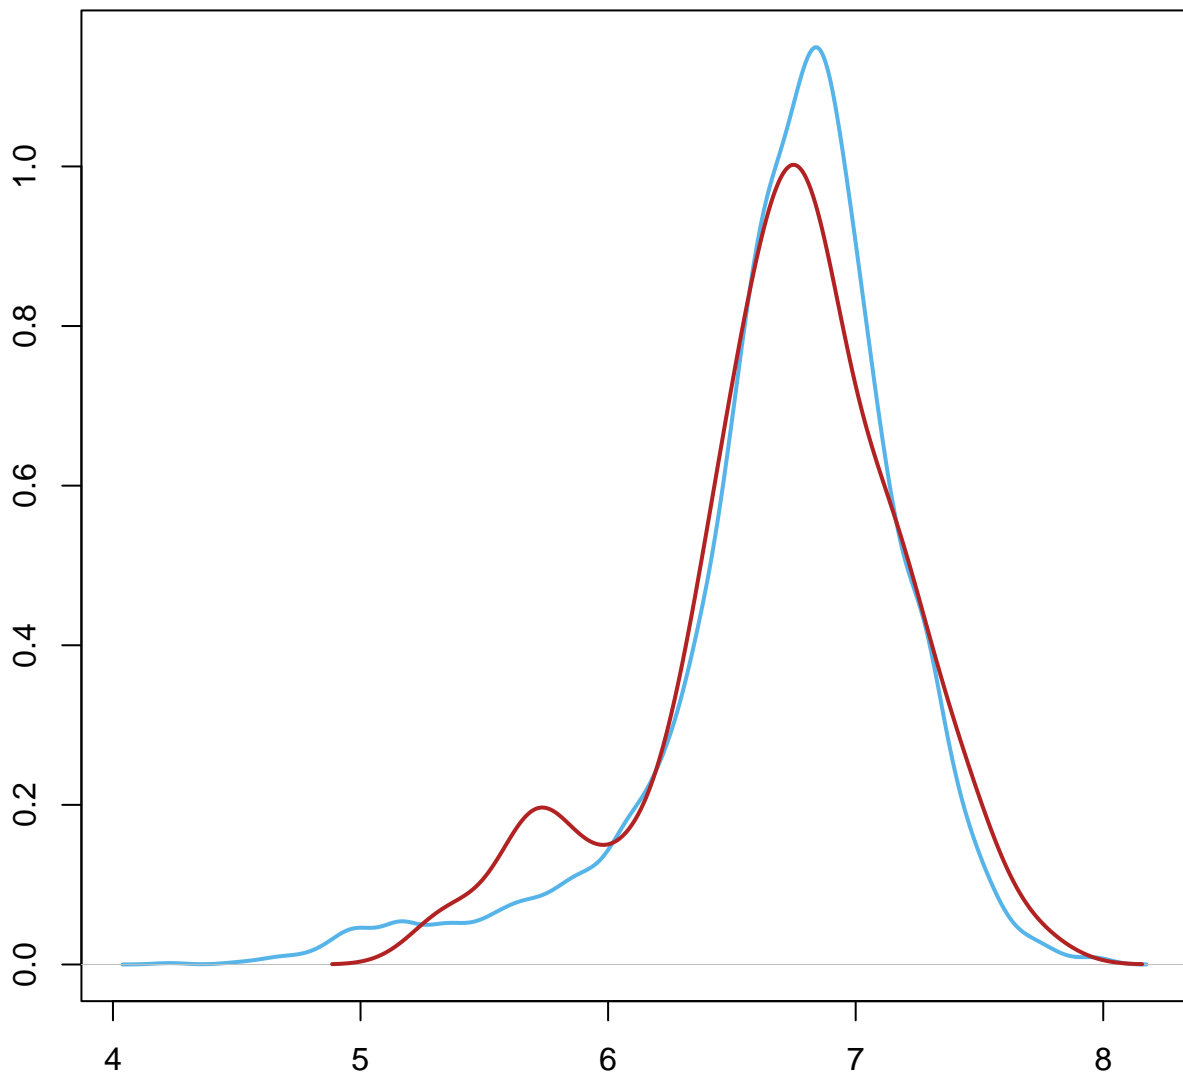

In\_Co

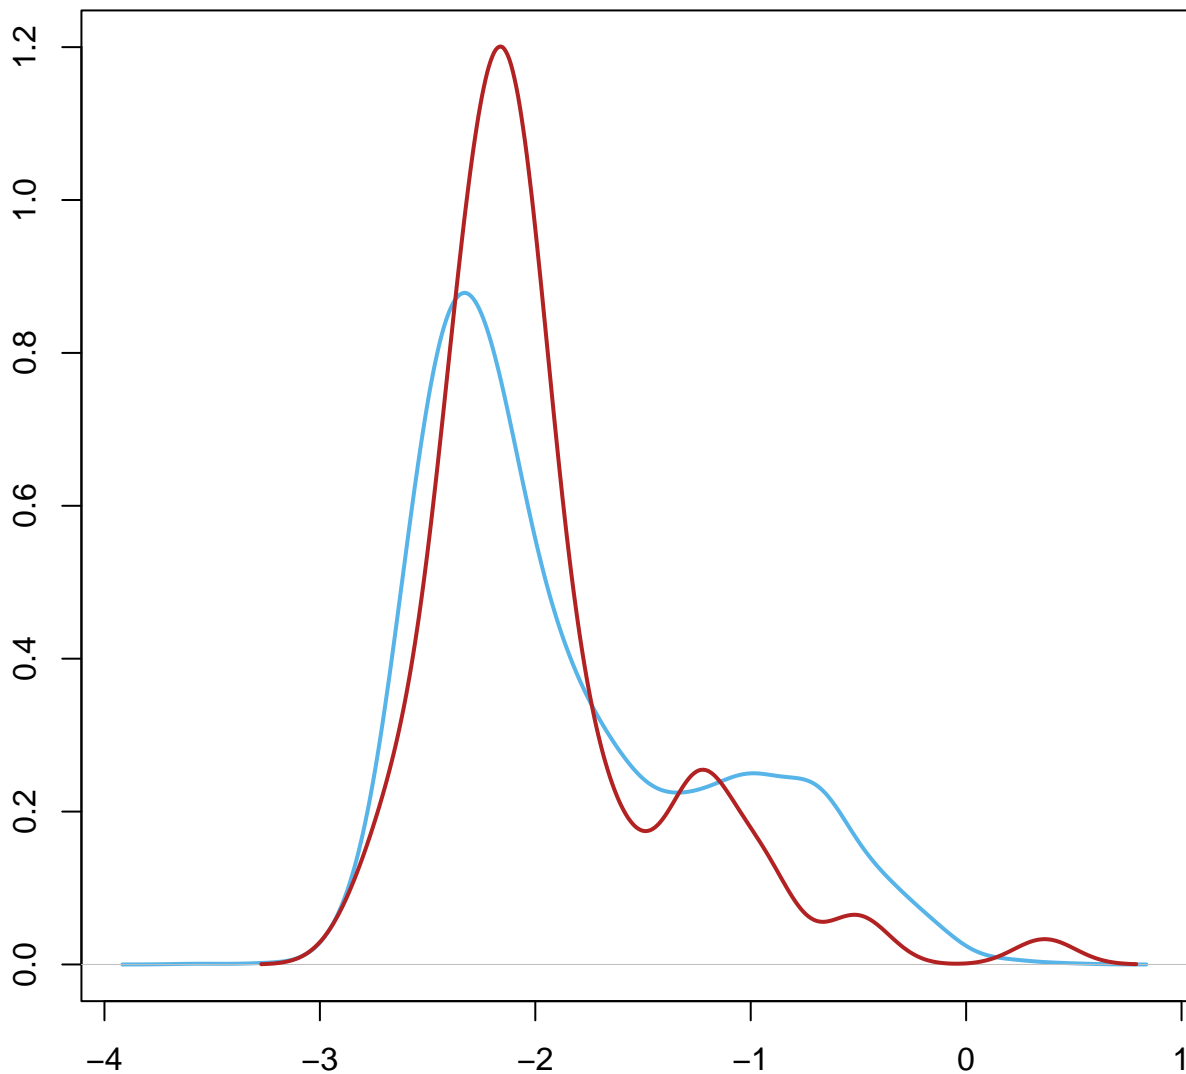



In\_Cu

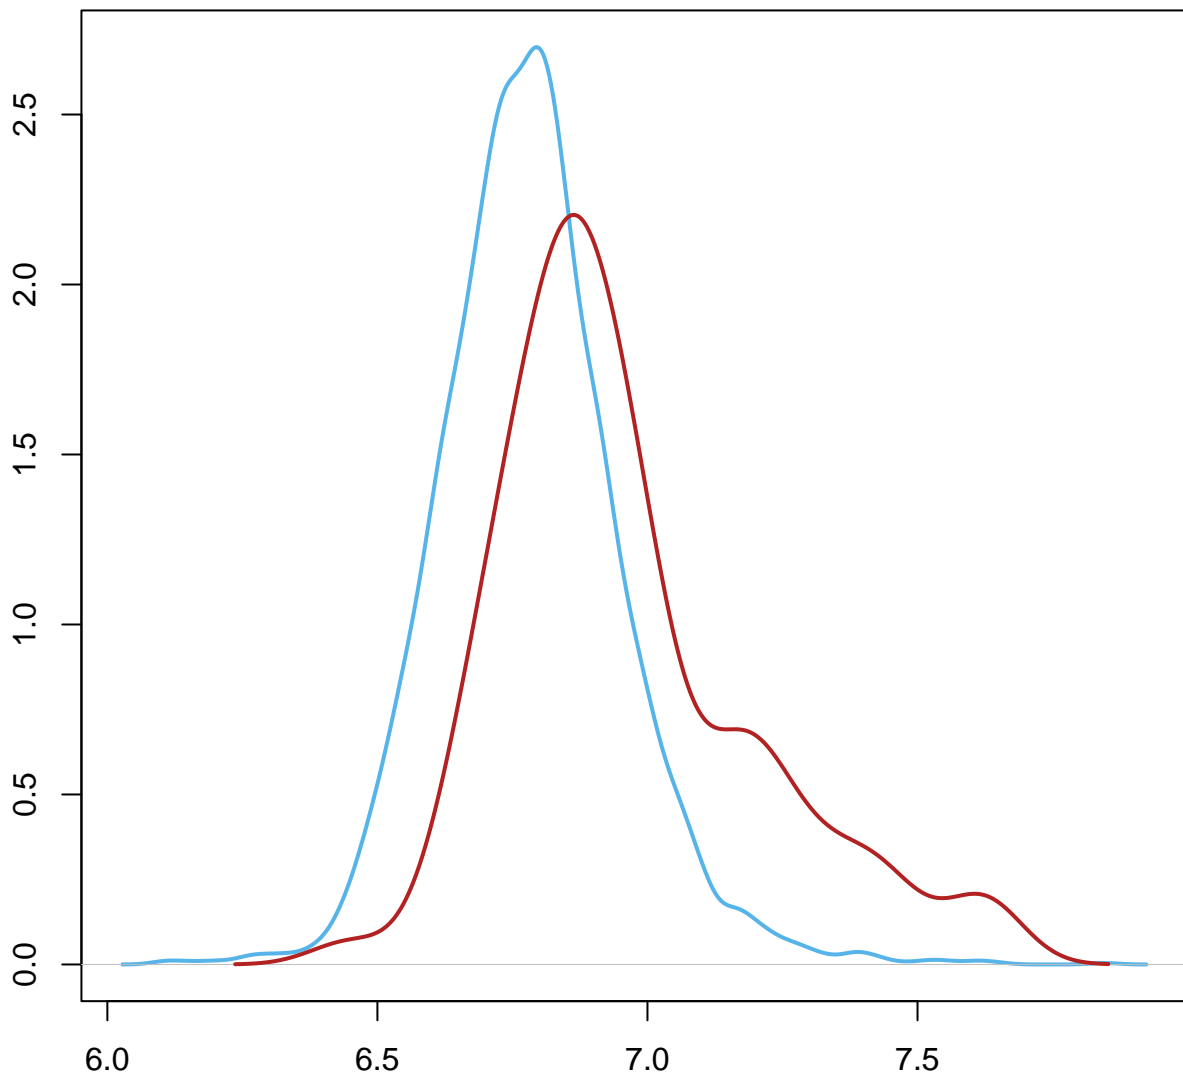

ln\_Zn

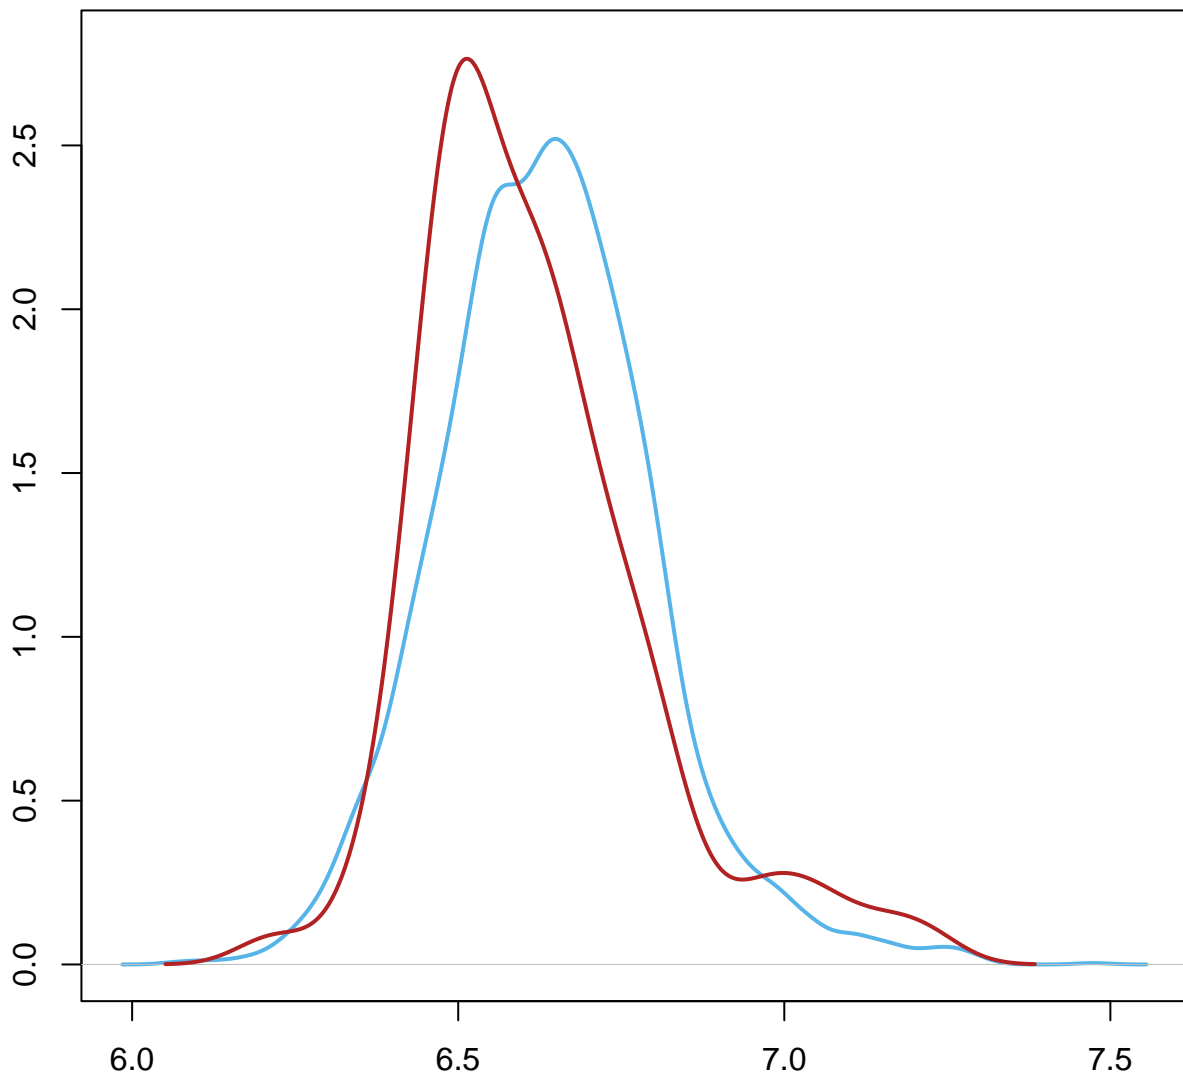

ln\_As

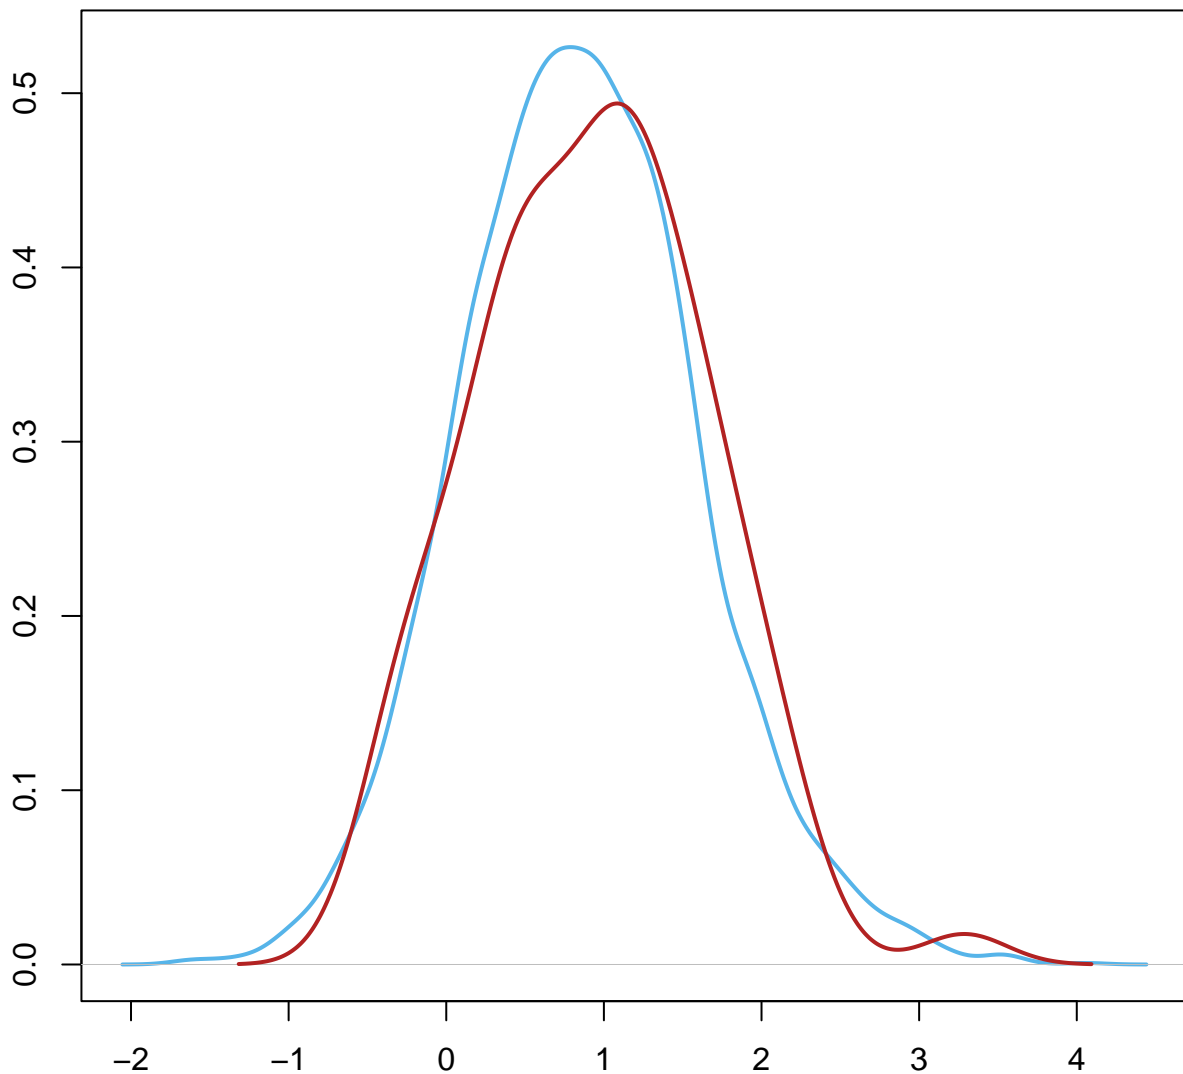

In\_Se

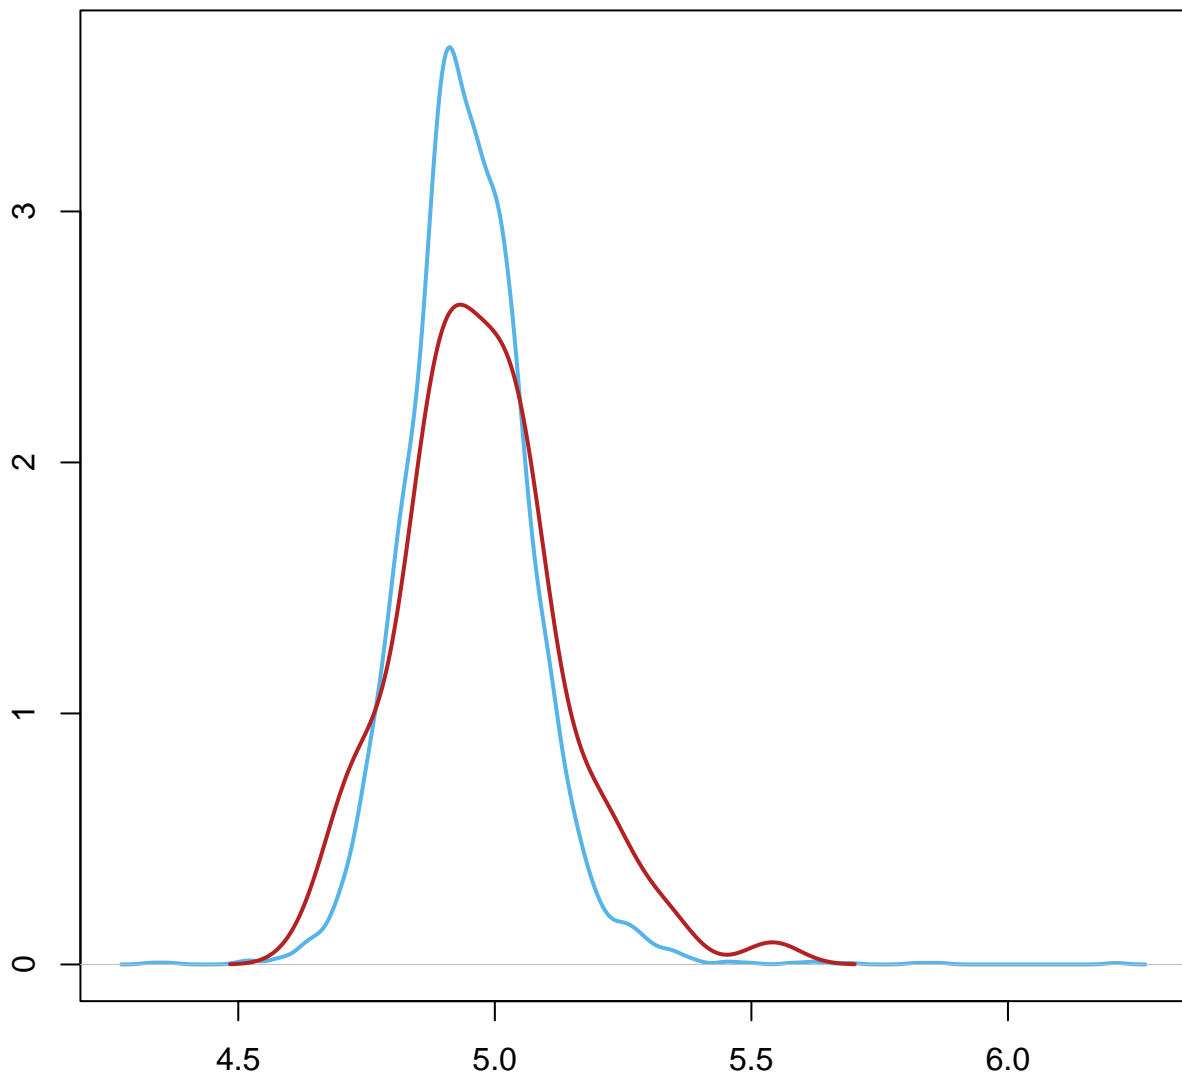

In\_Rb

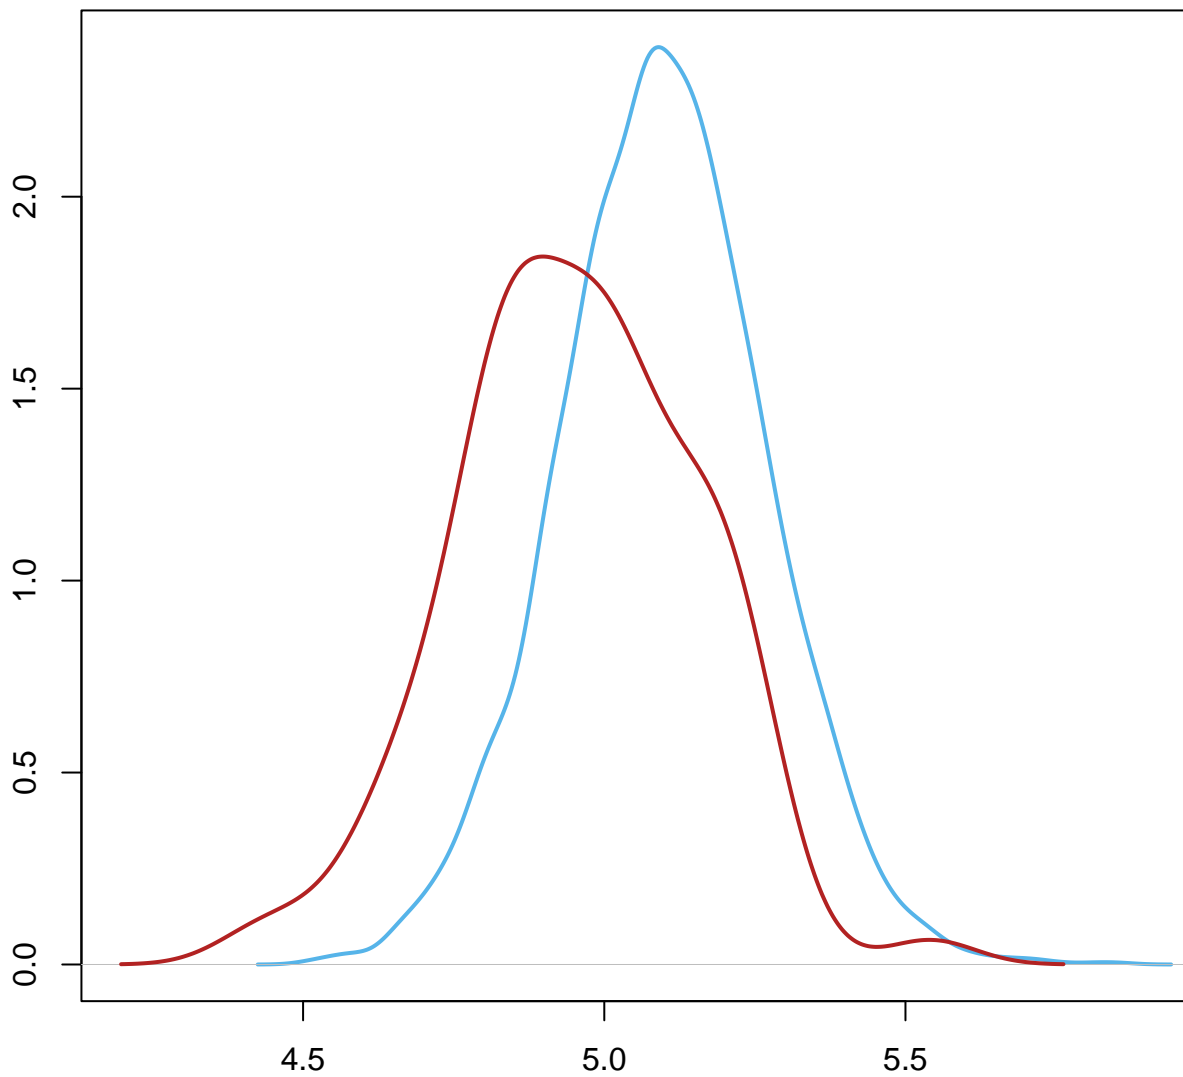

In\_Sr

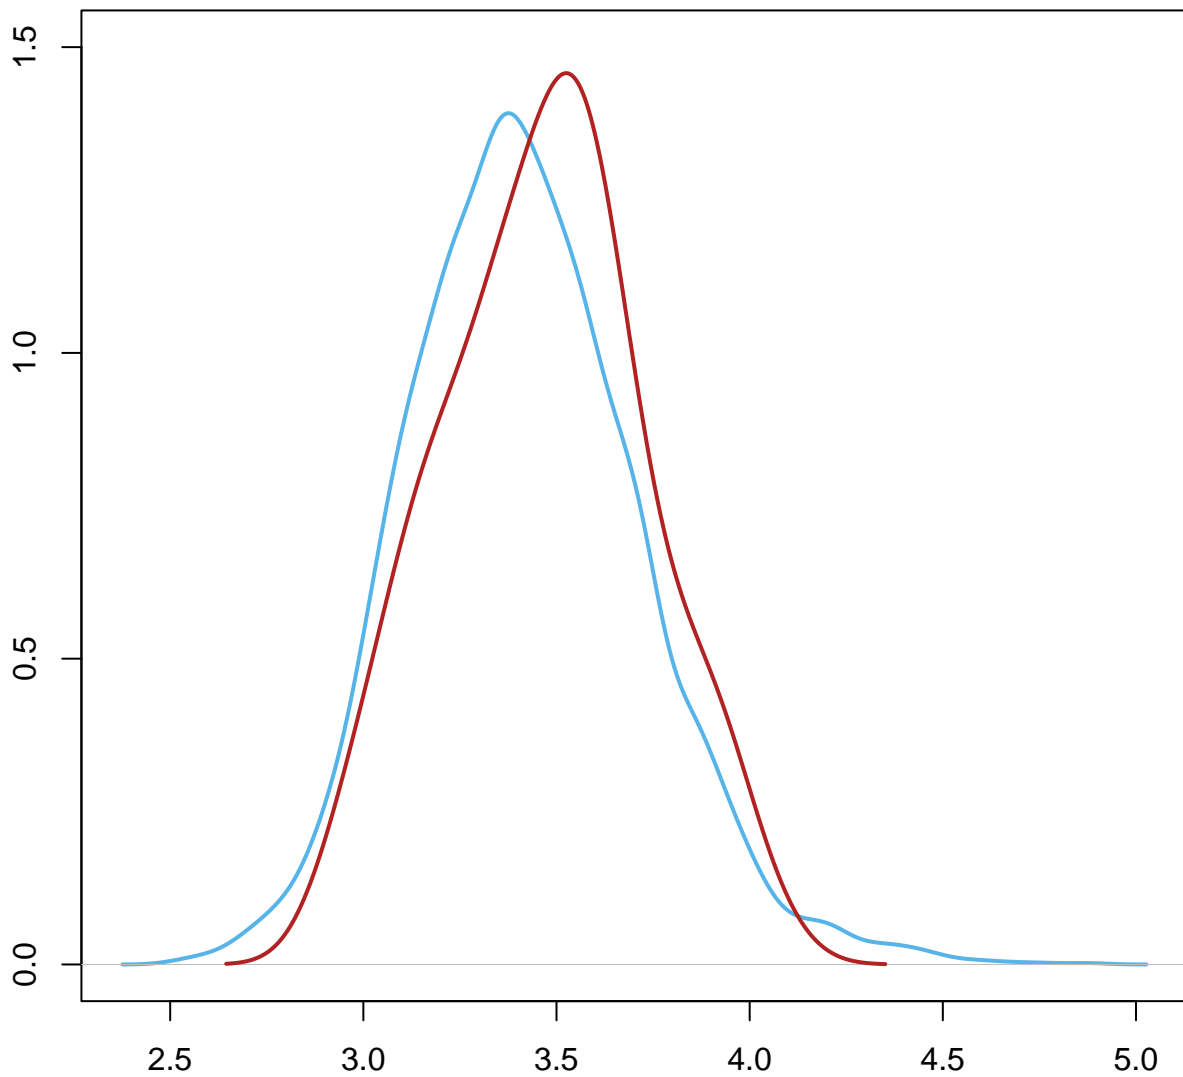

In\_Mo

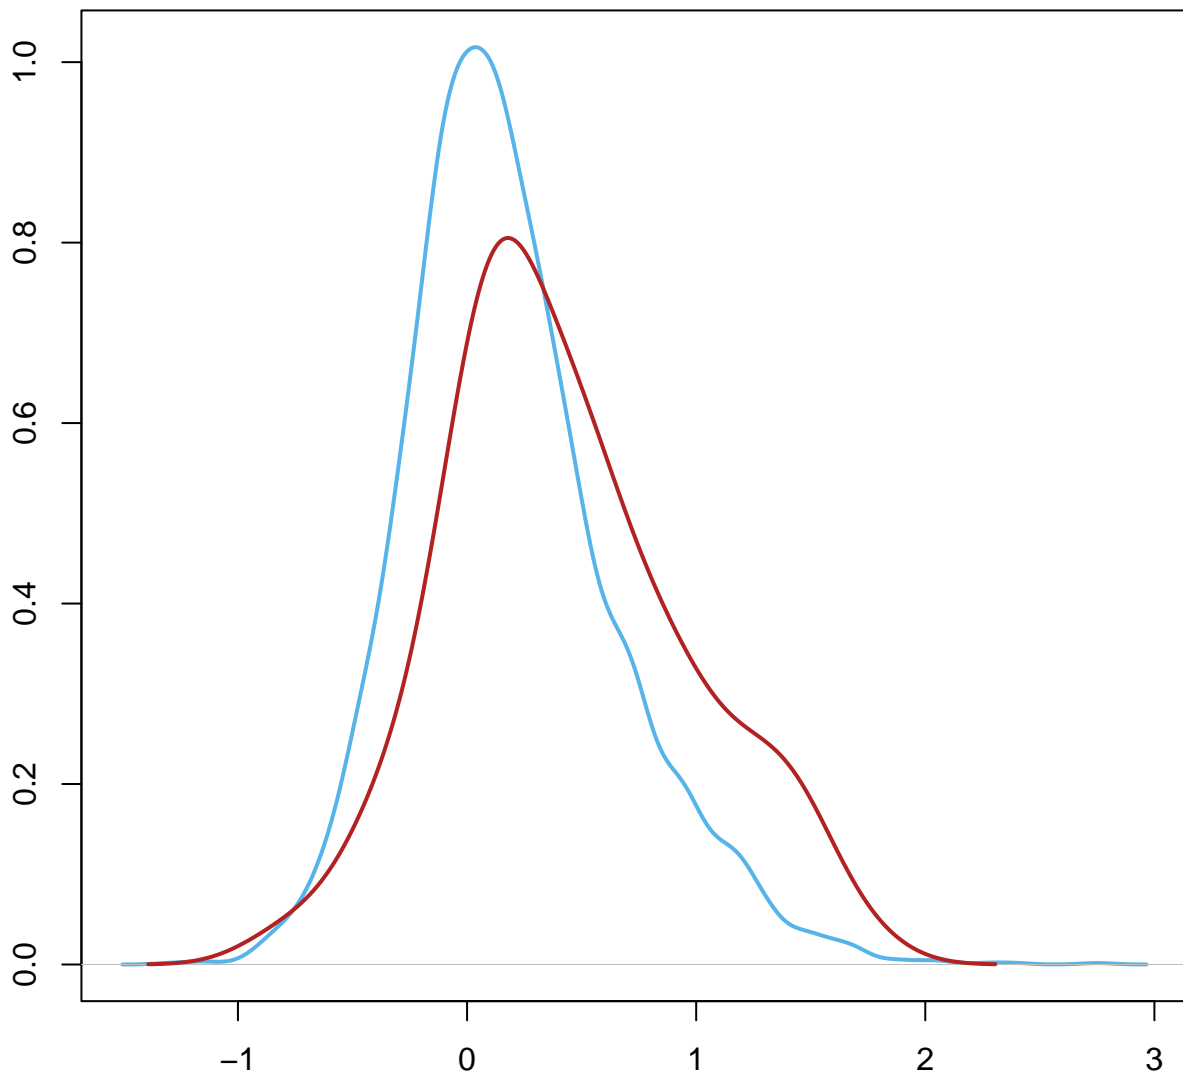

ln\_Ag

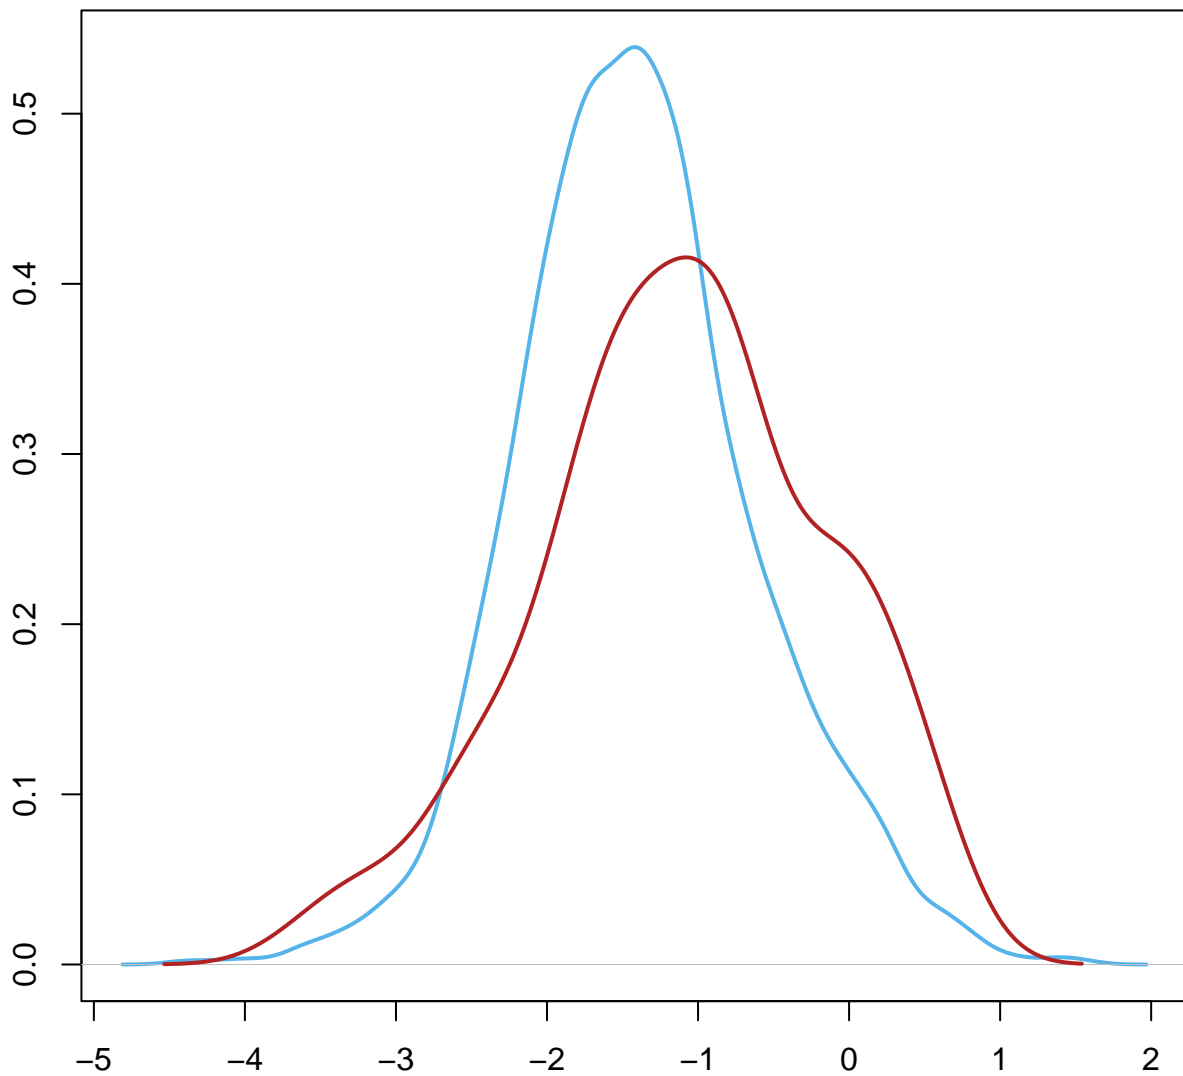



ln\_Cs

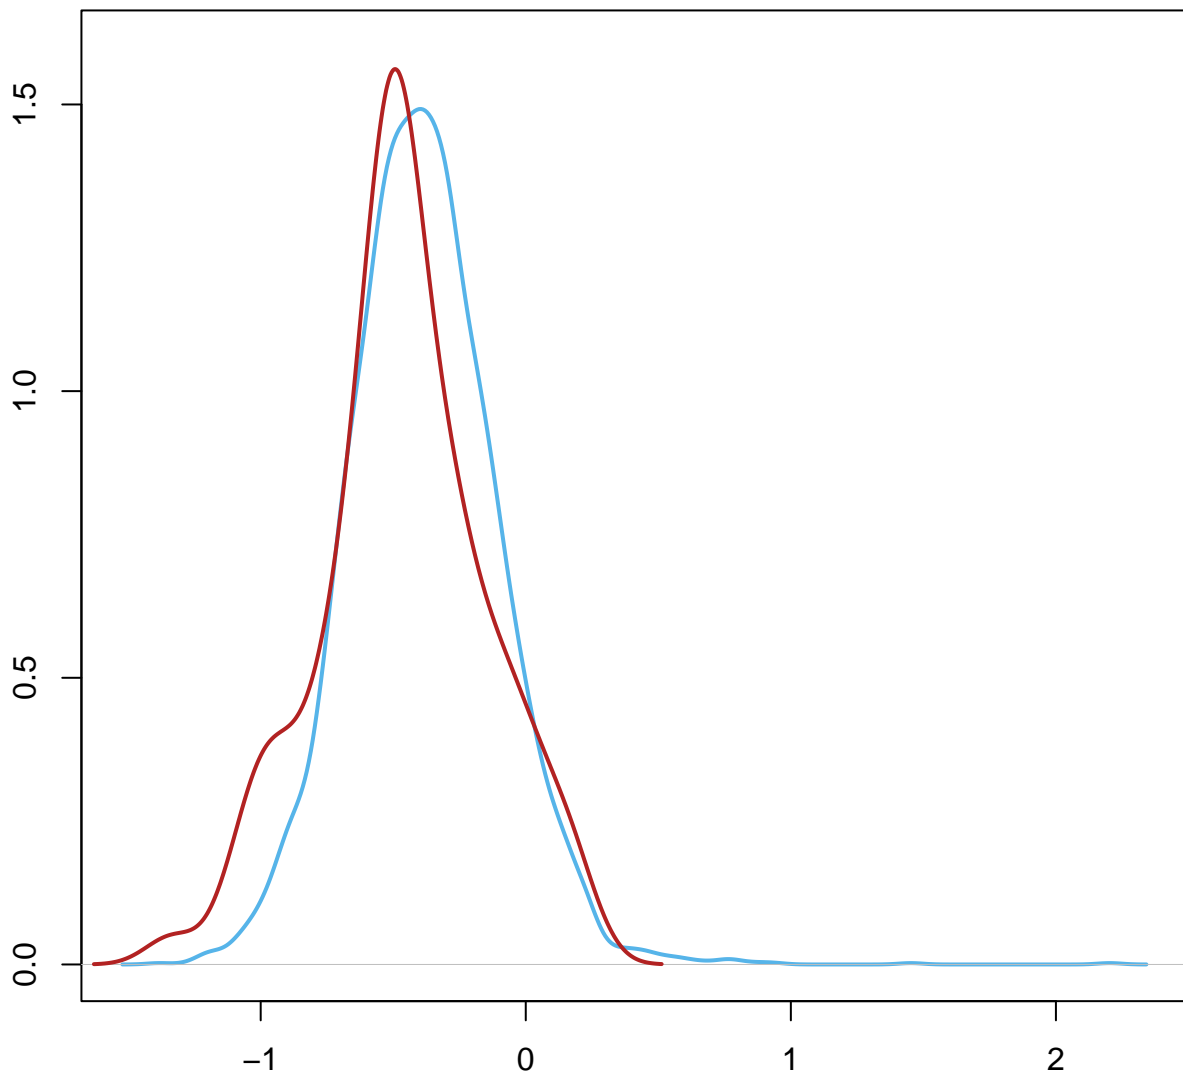

Supplement: Supporting_Figure_1.zip [file Supporting_Figure_1.zip]

In\_Na

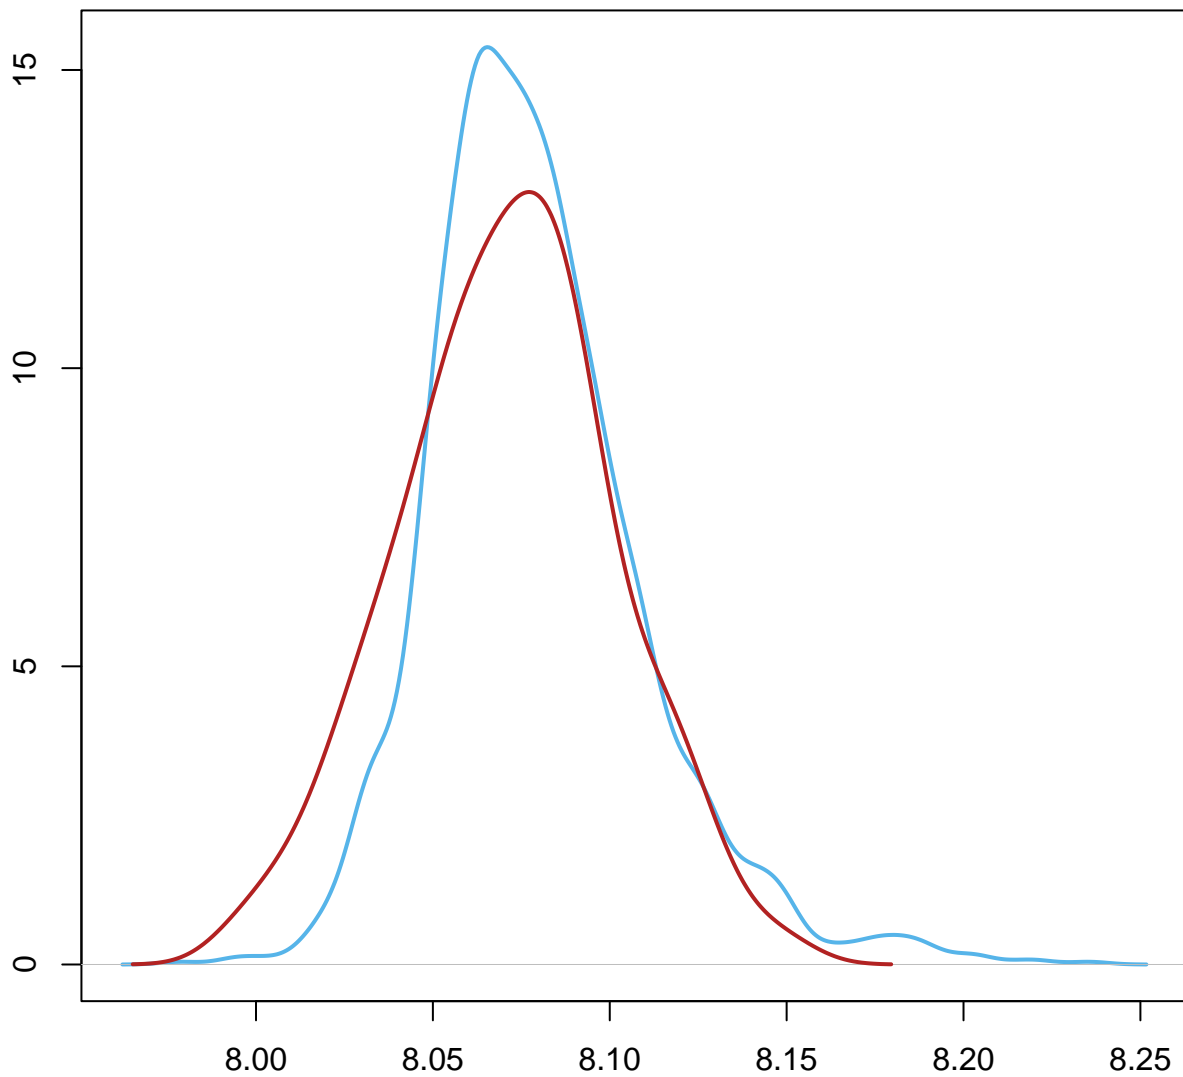

ln\_Mg

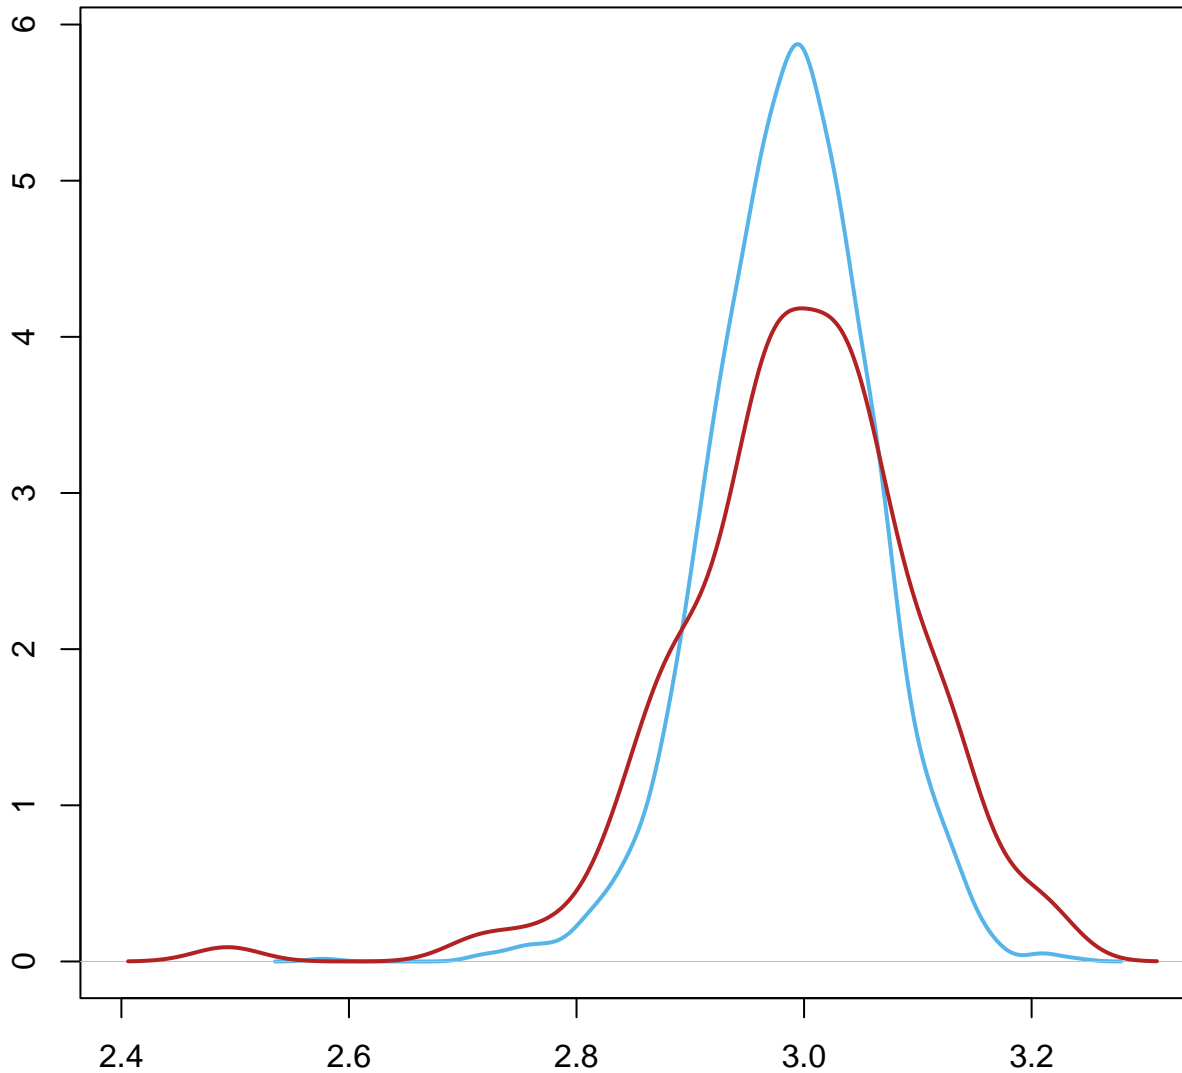

ln\_P

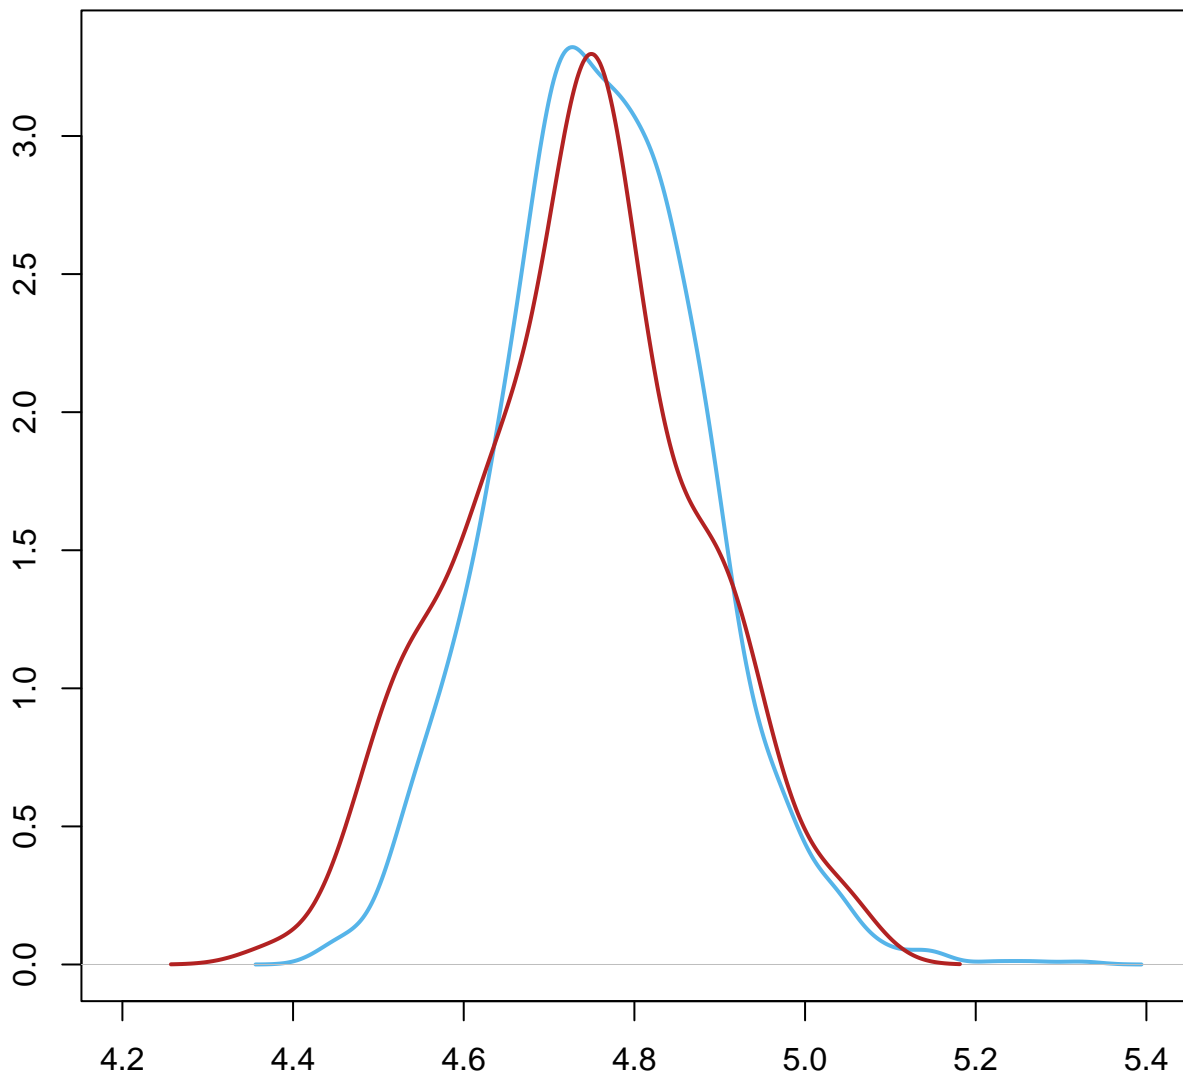

ln\_S

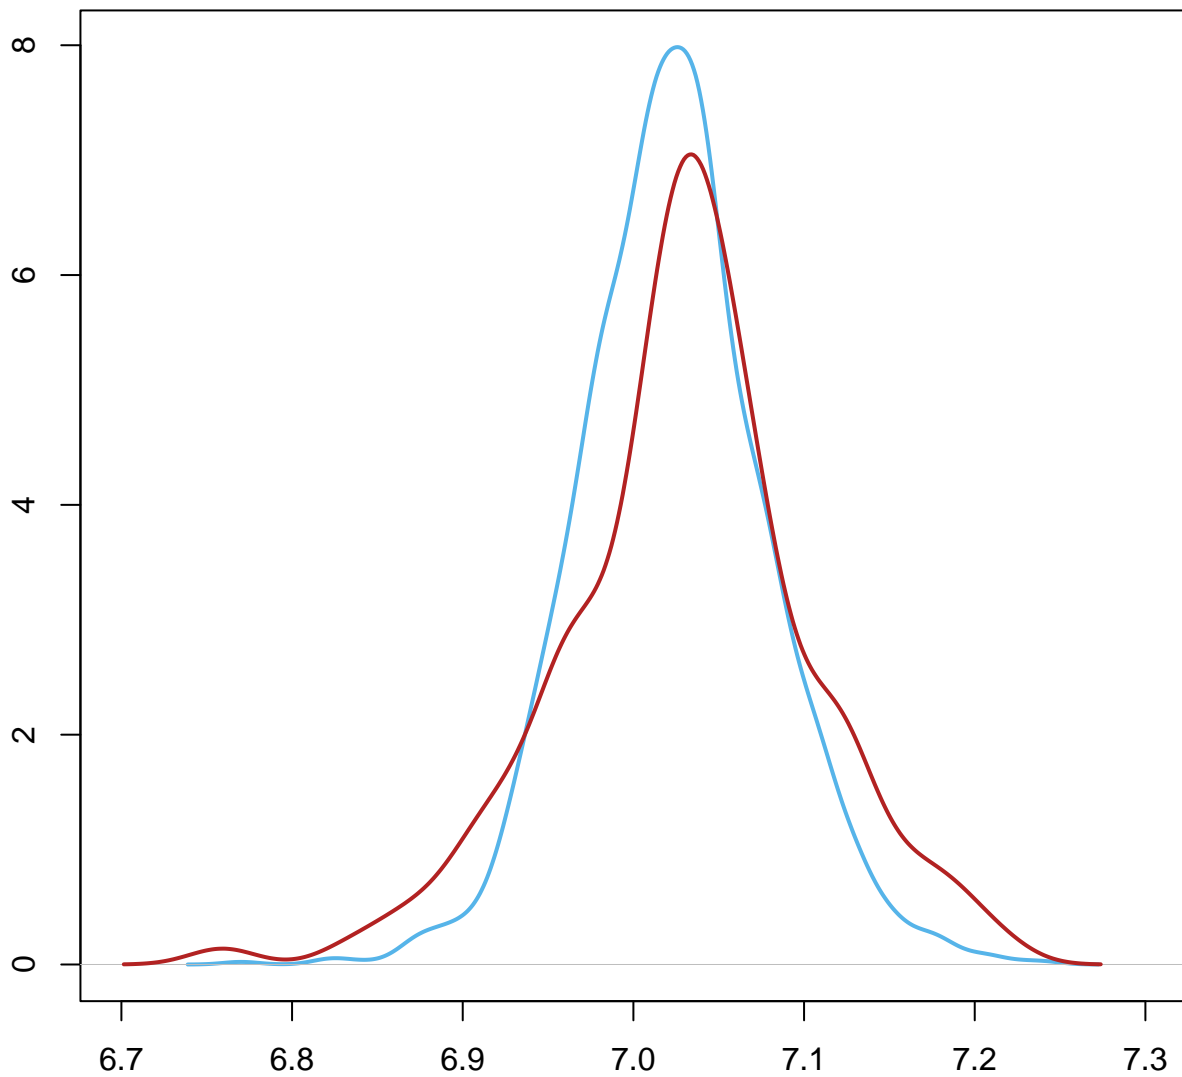

$\ln_K$

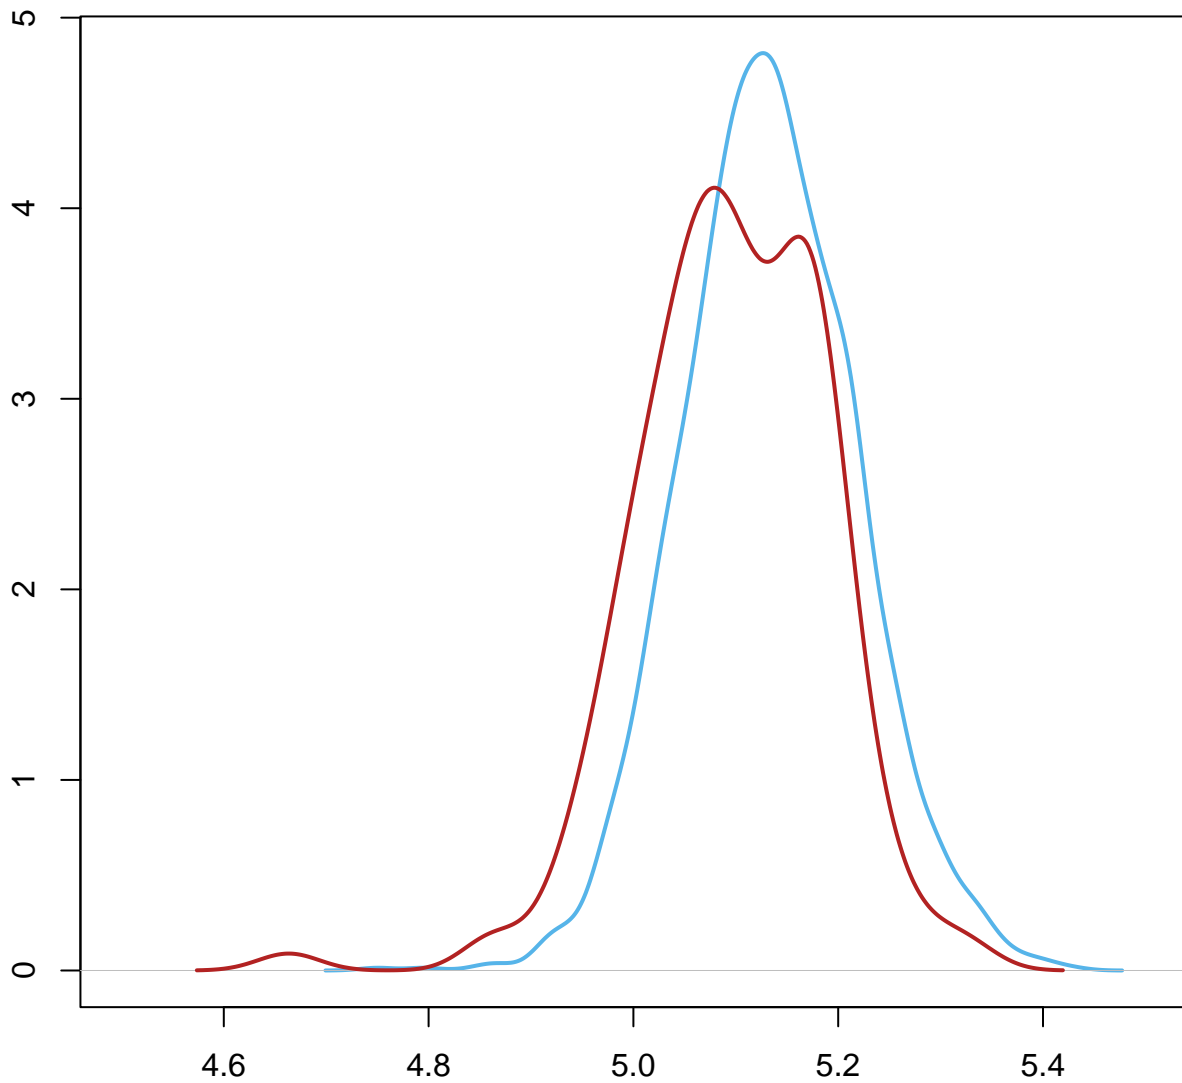

In\_Ca

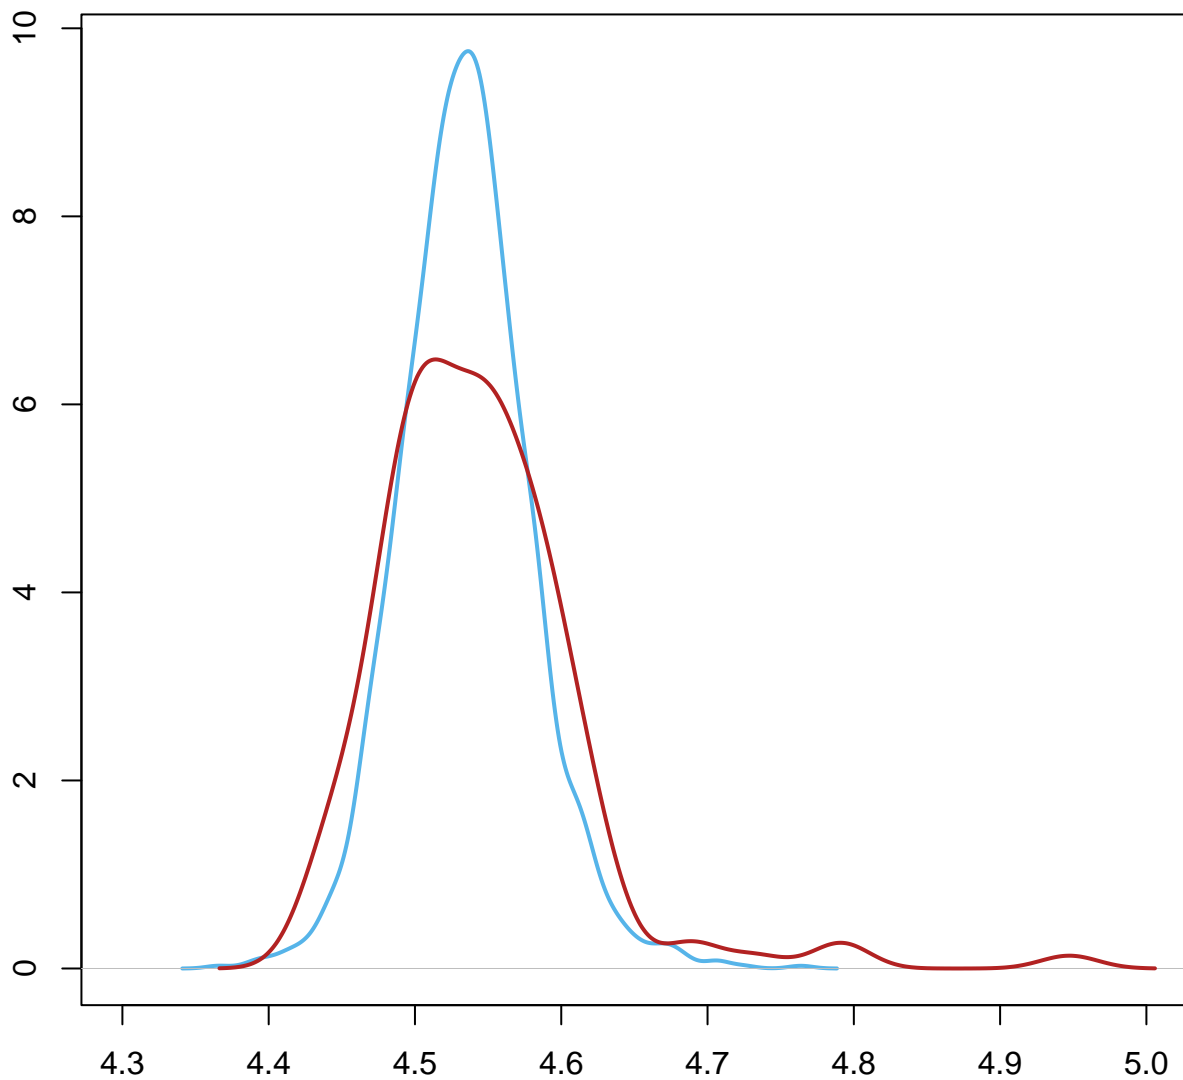

In\_Fe

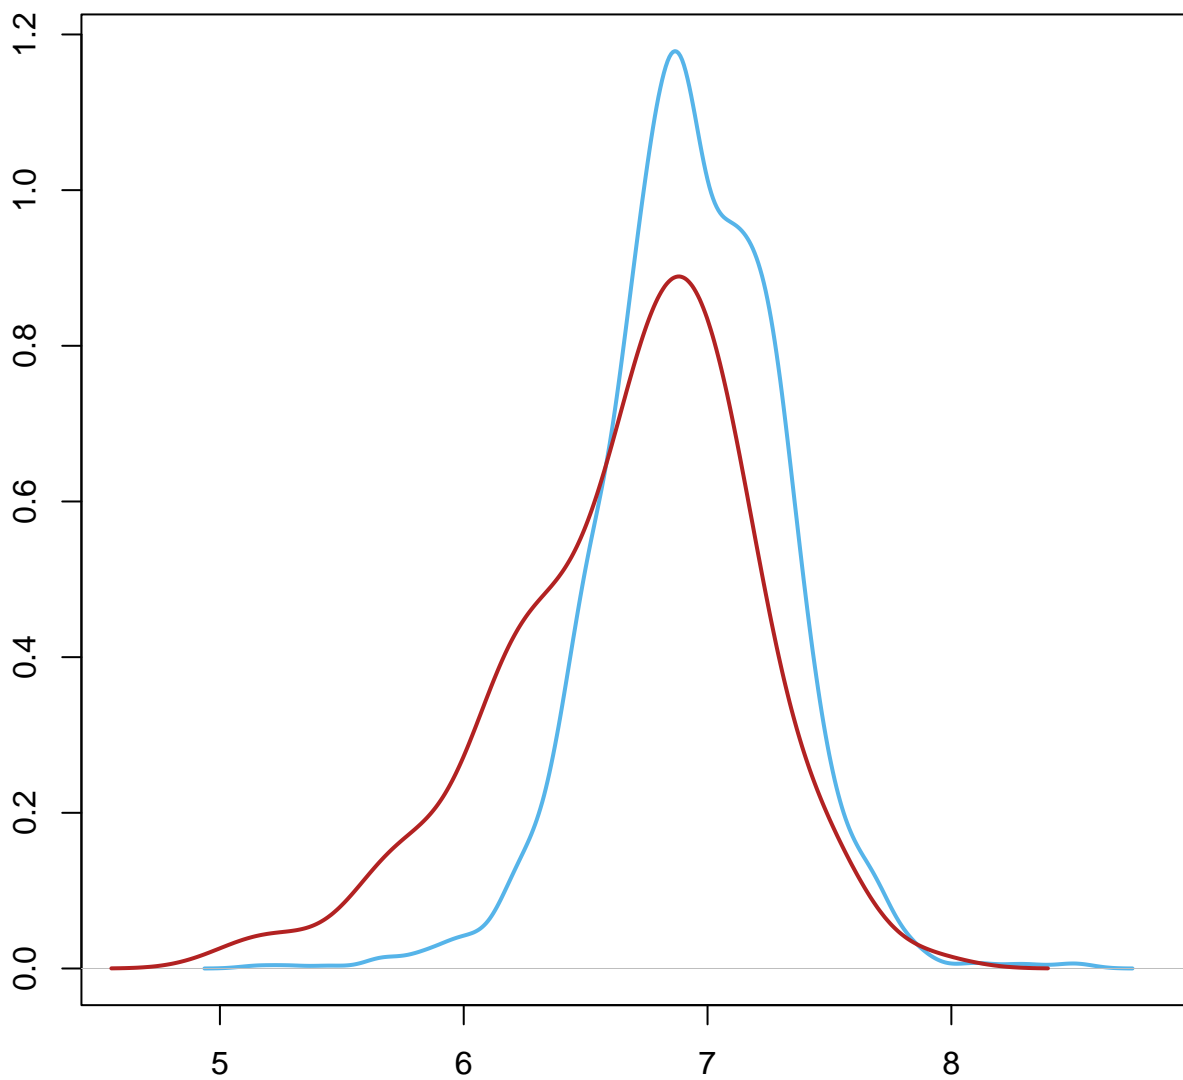

In\_Co

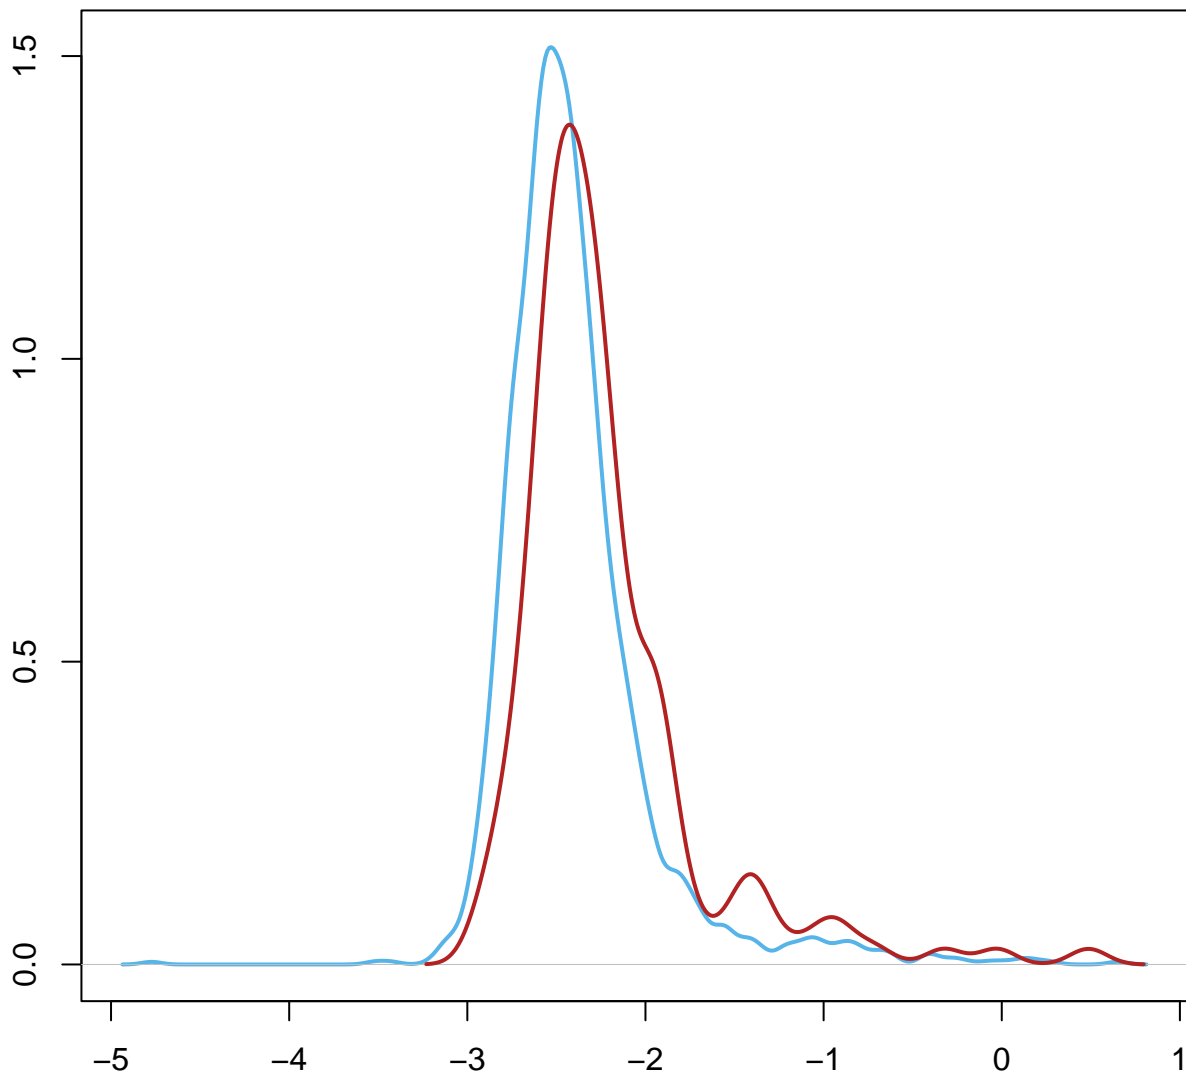



In\_Cu

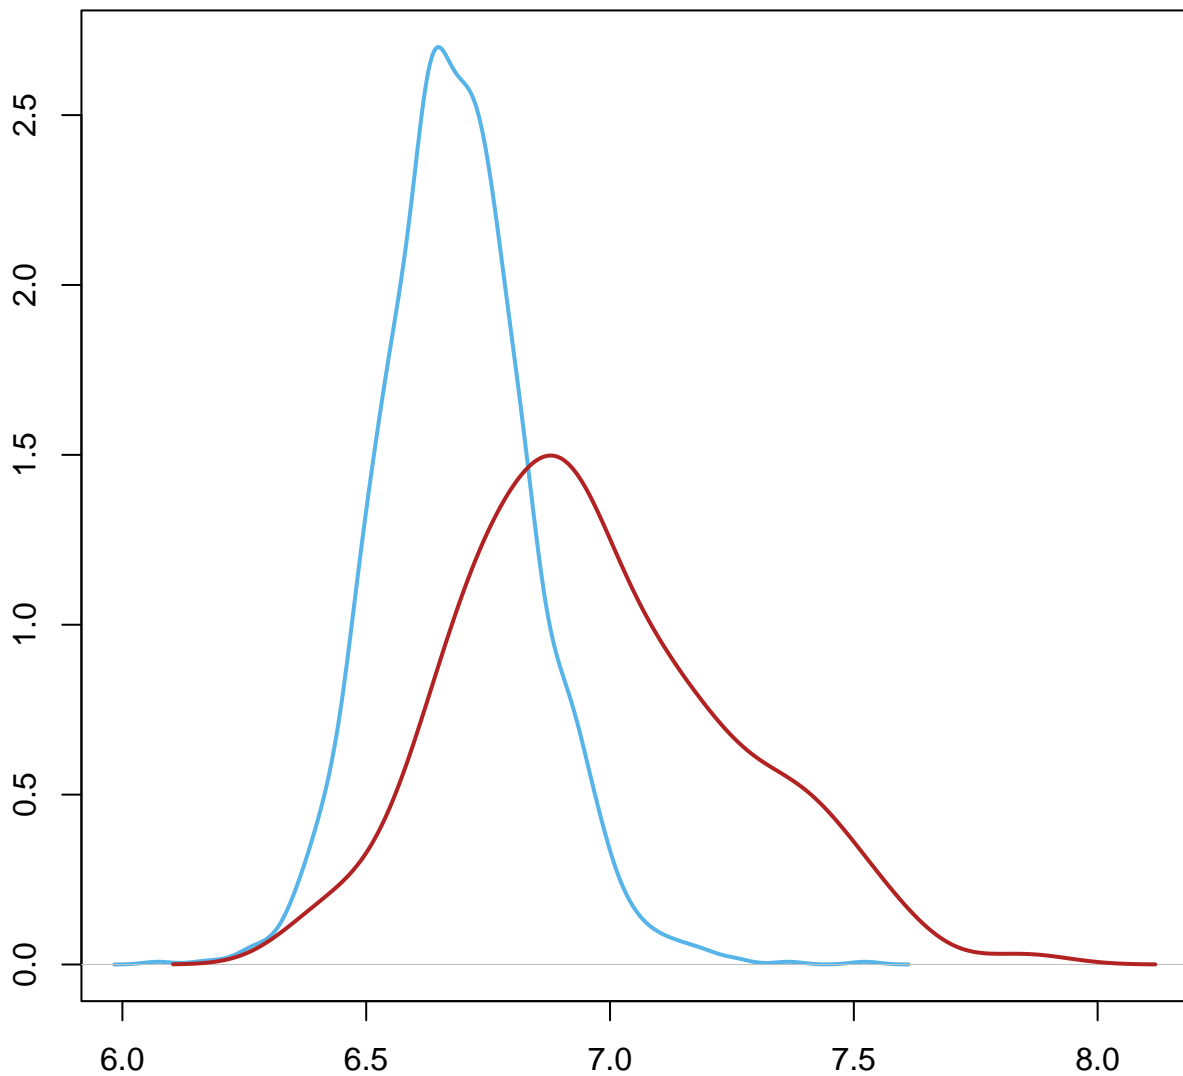

ln\_Zn

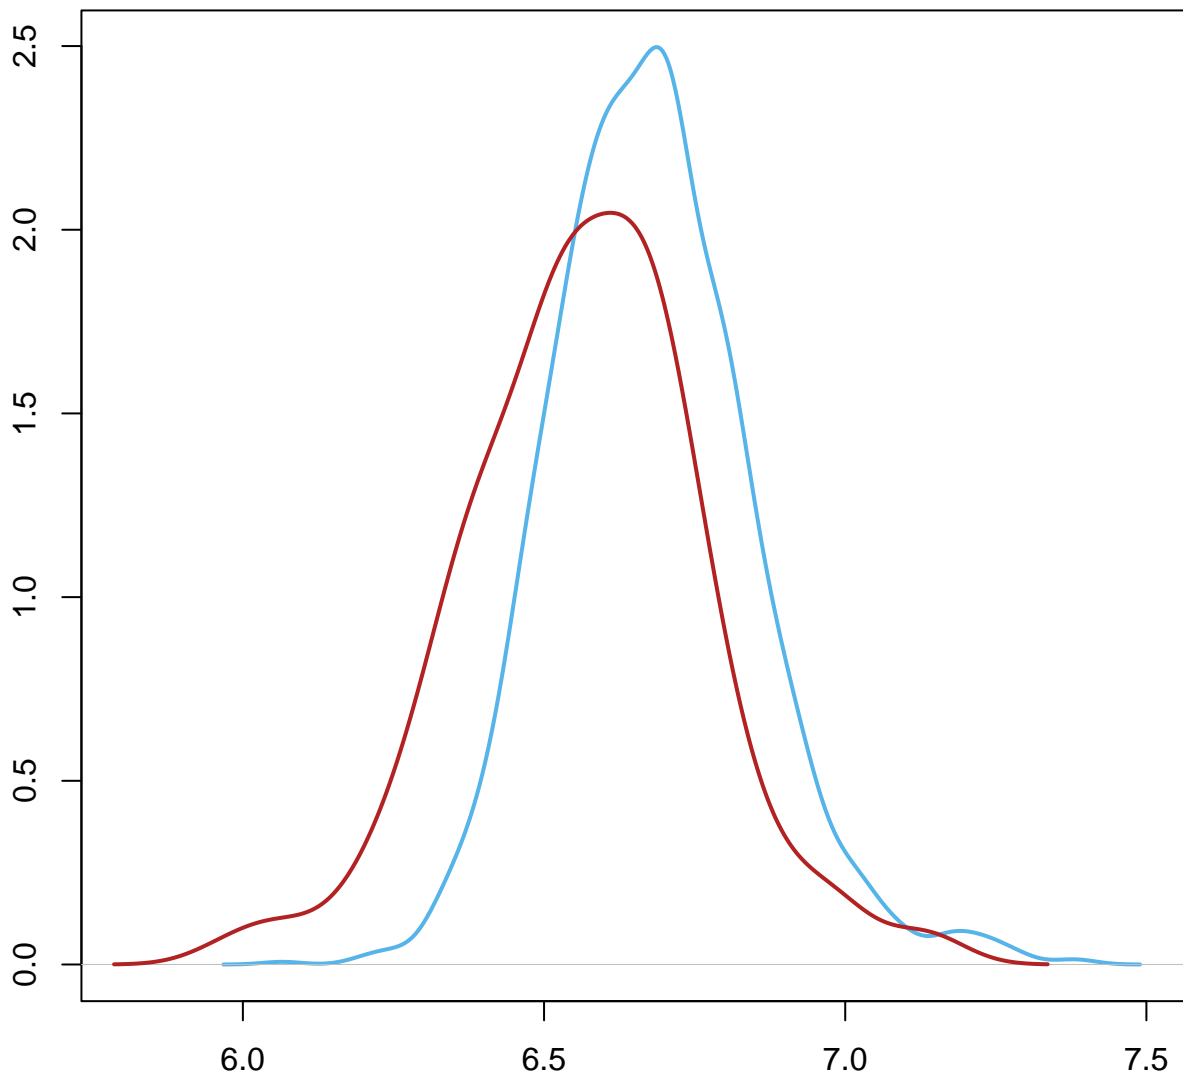

ln\_As

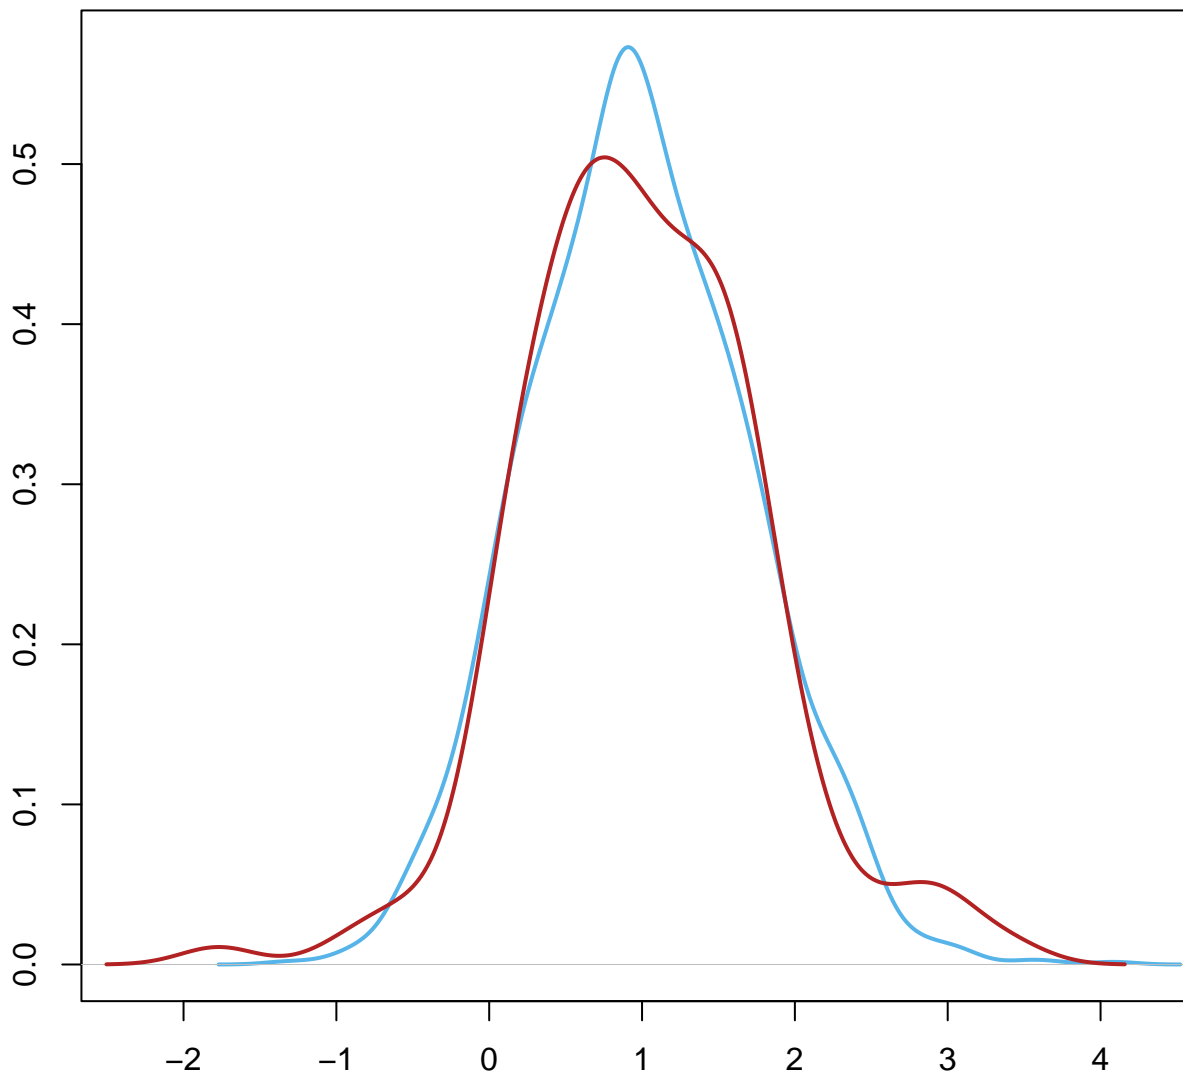

In\_Se

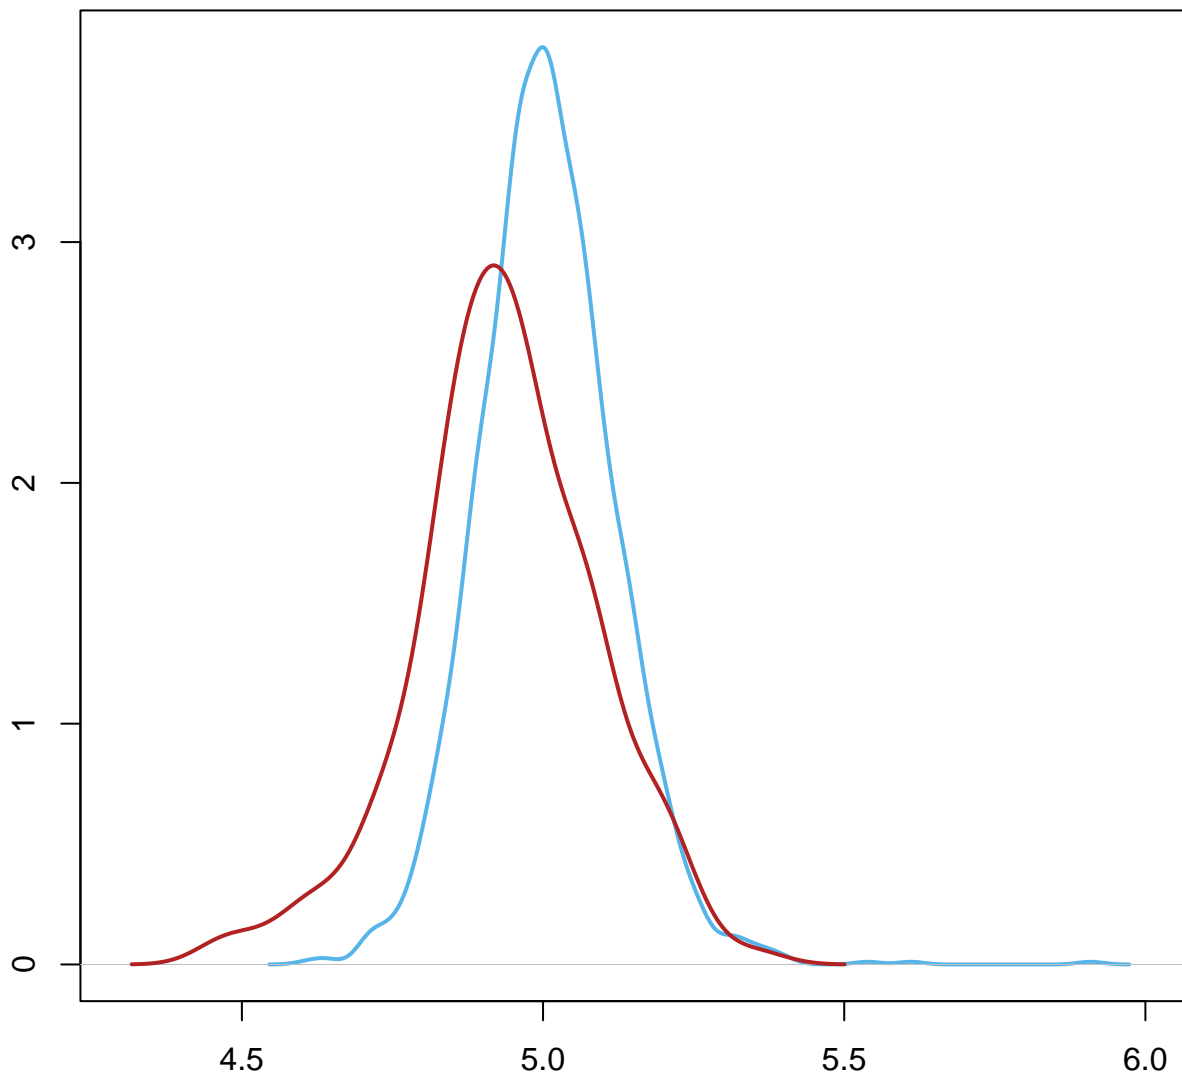

In\_Rb

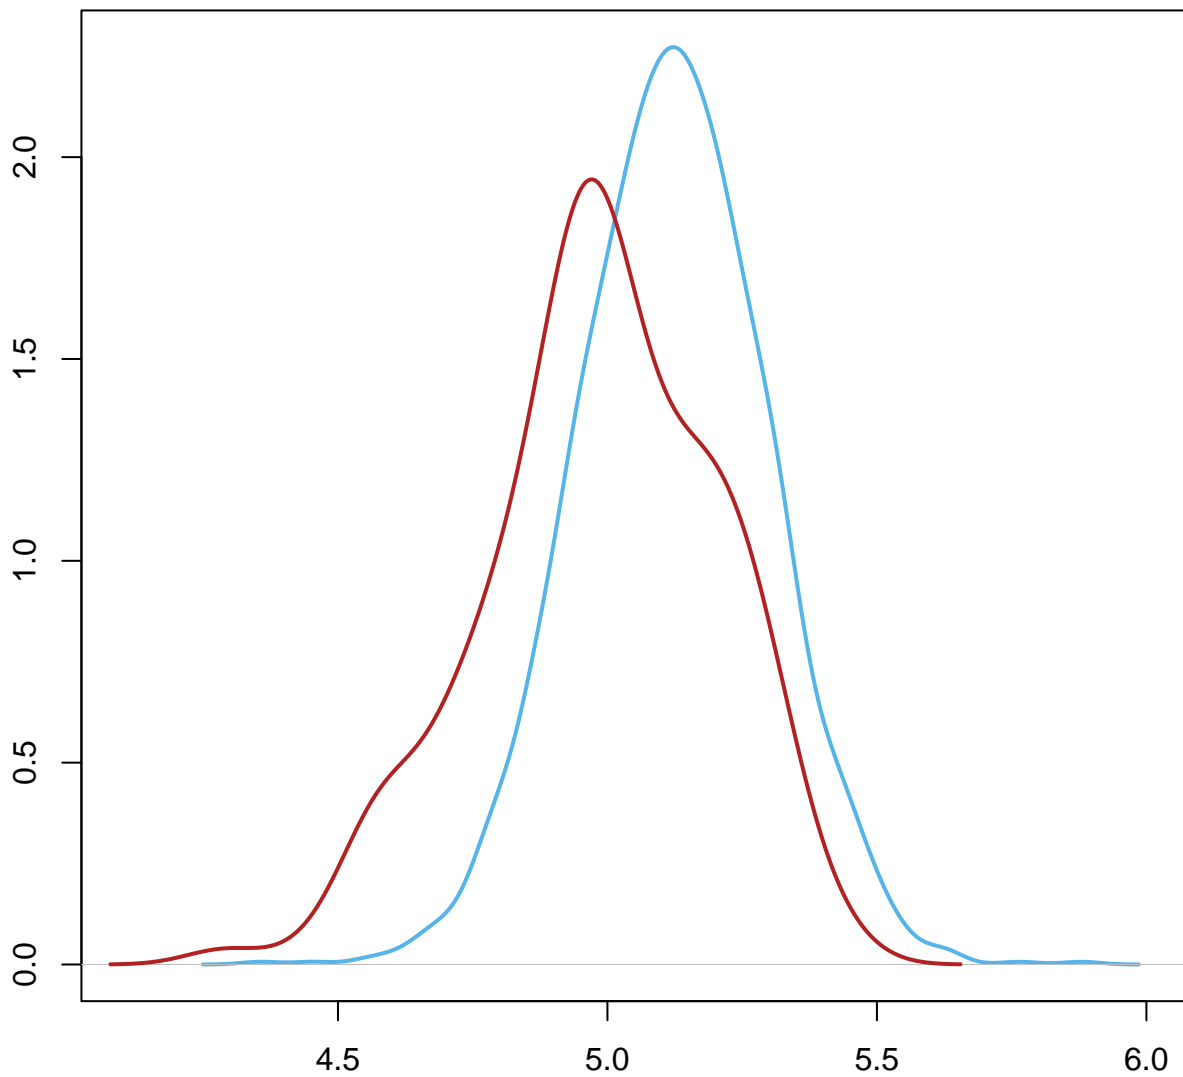

In\_Sr

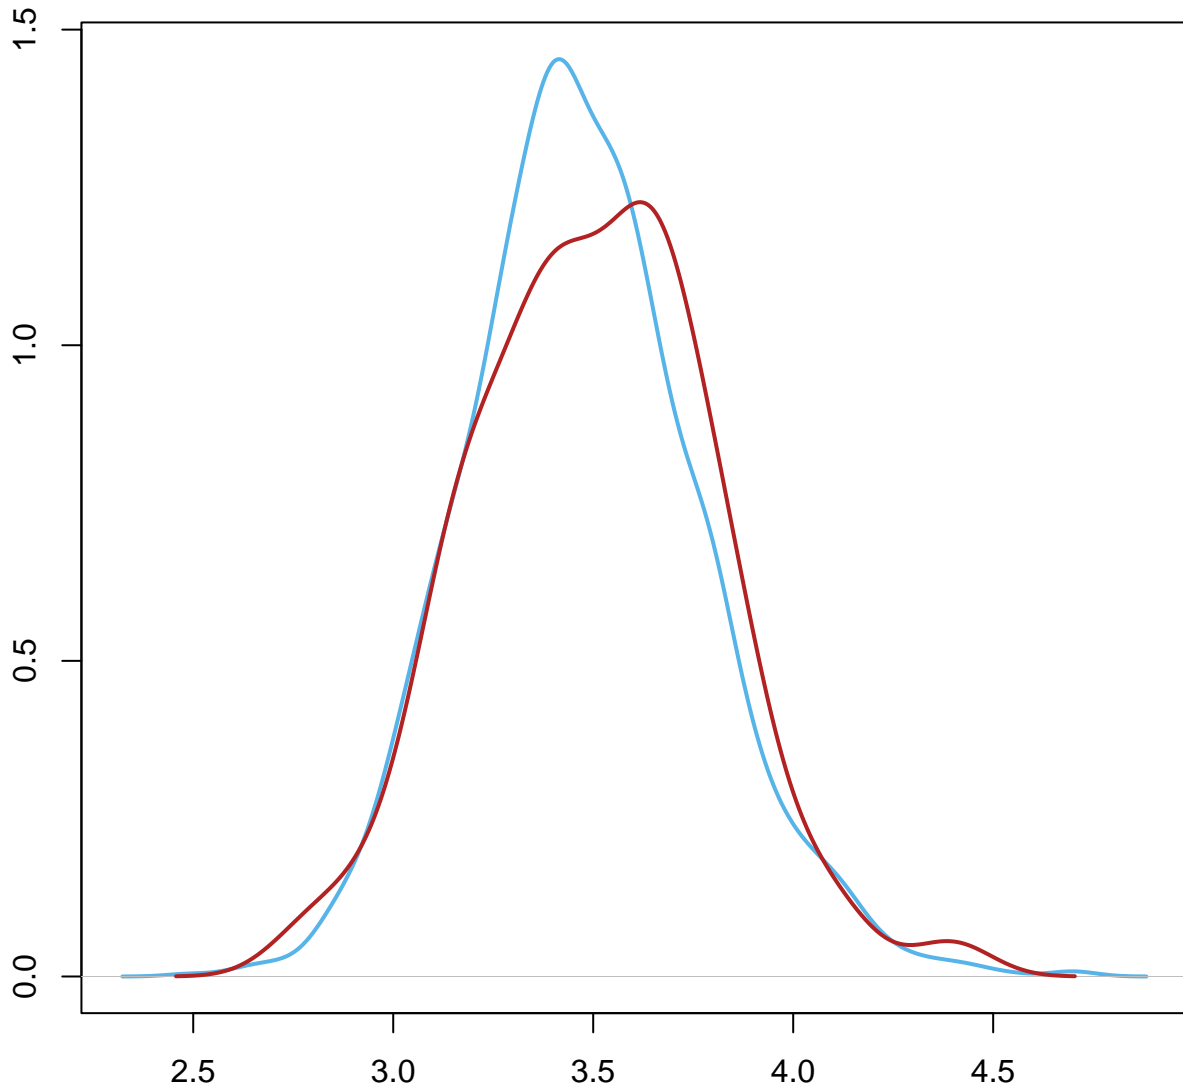

In\_Mo

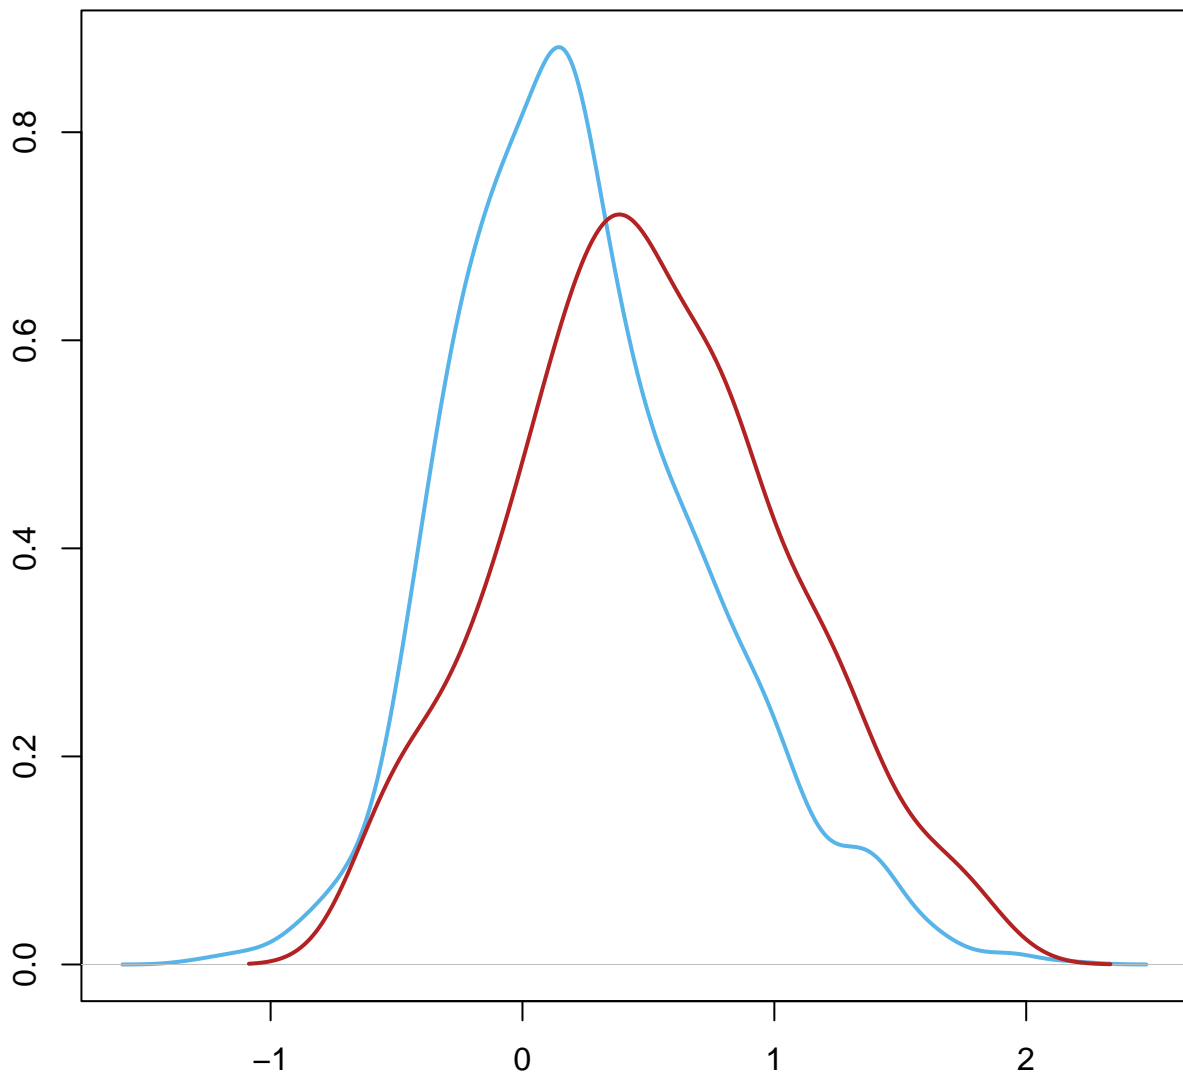

In\_Ag

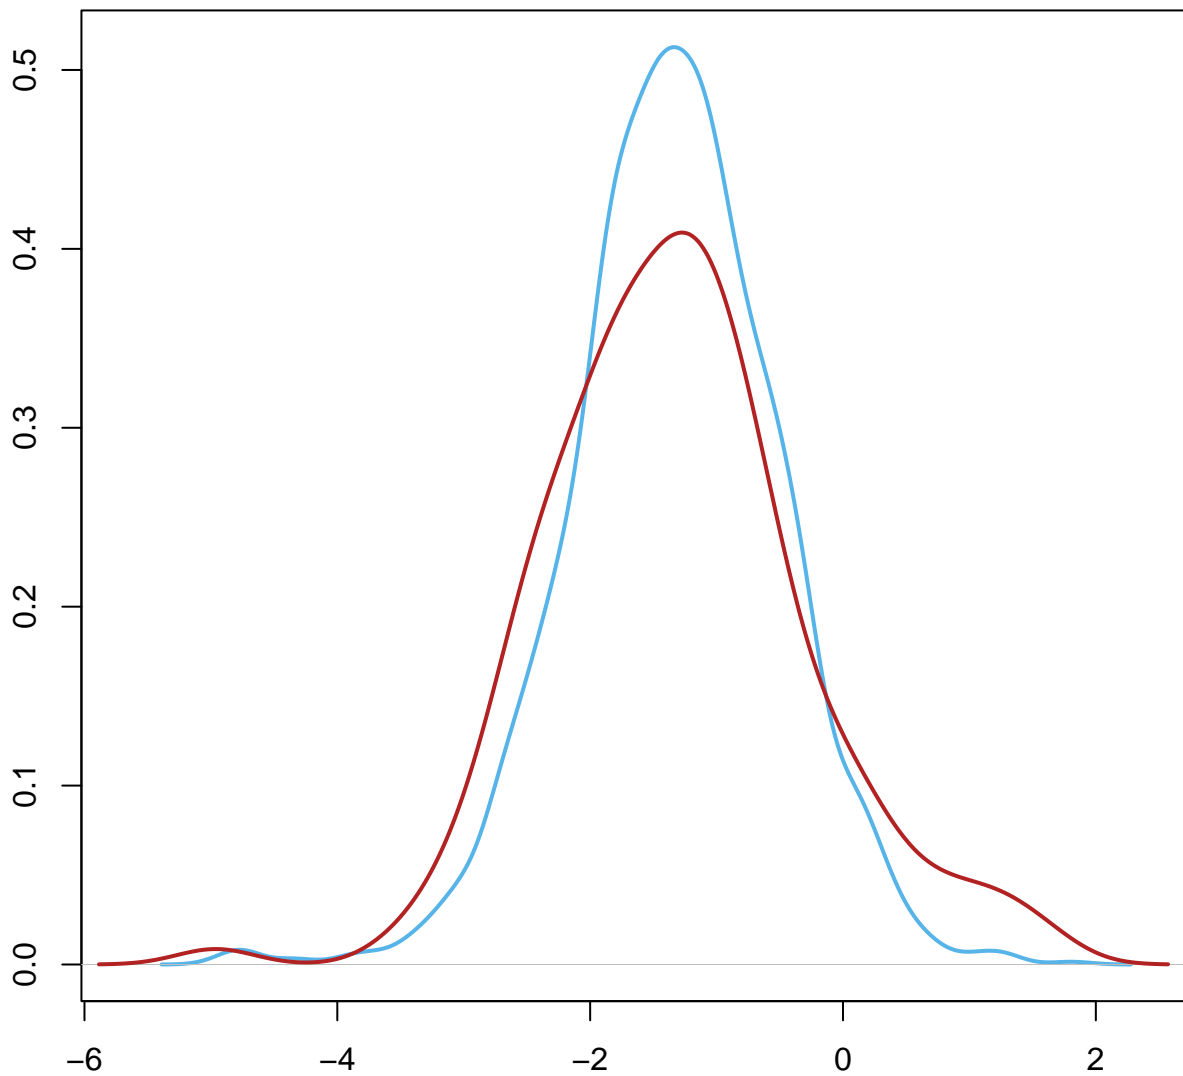



ln\_Cs

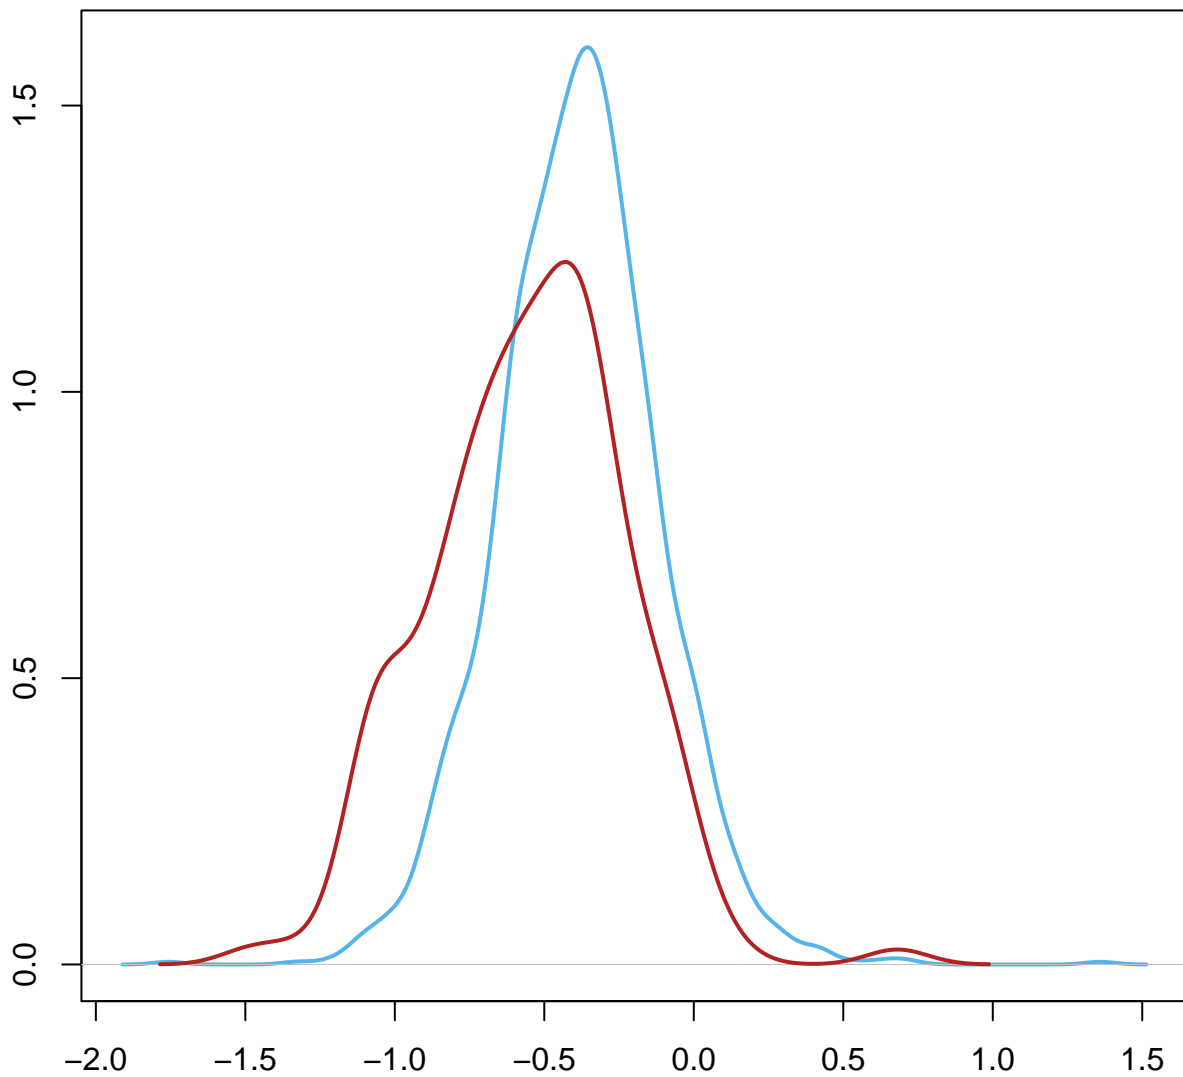

Supplement: Supporting_Figure_1.zip [file Supporting_Figure_1.zip]

In\_Na

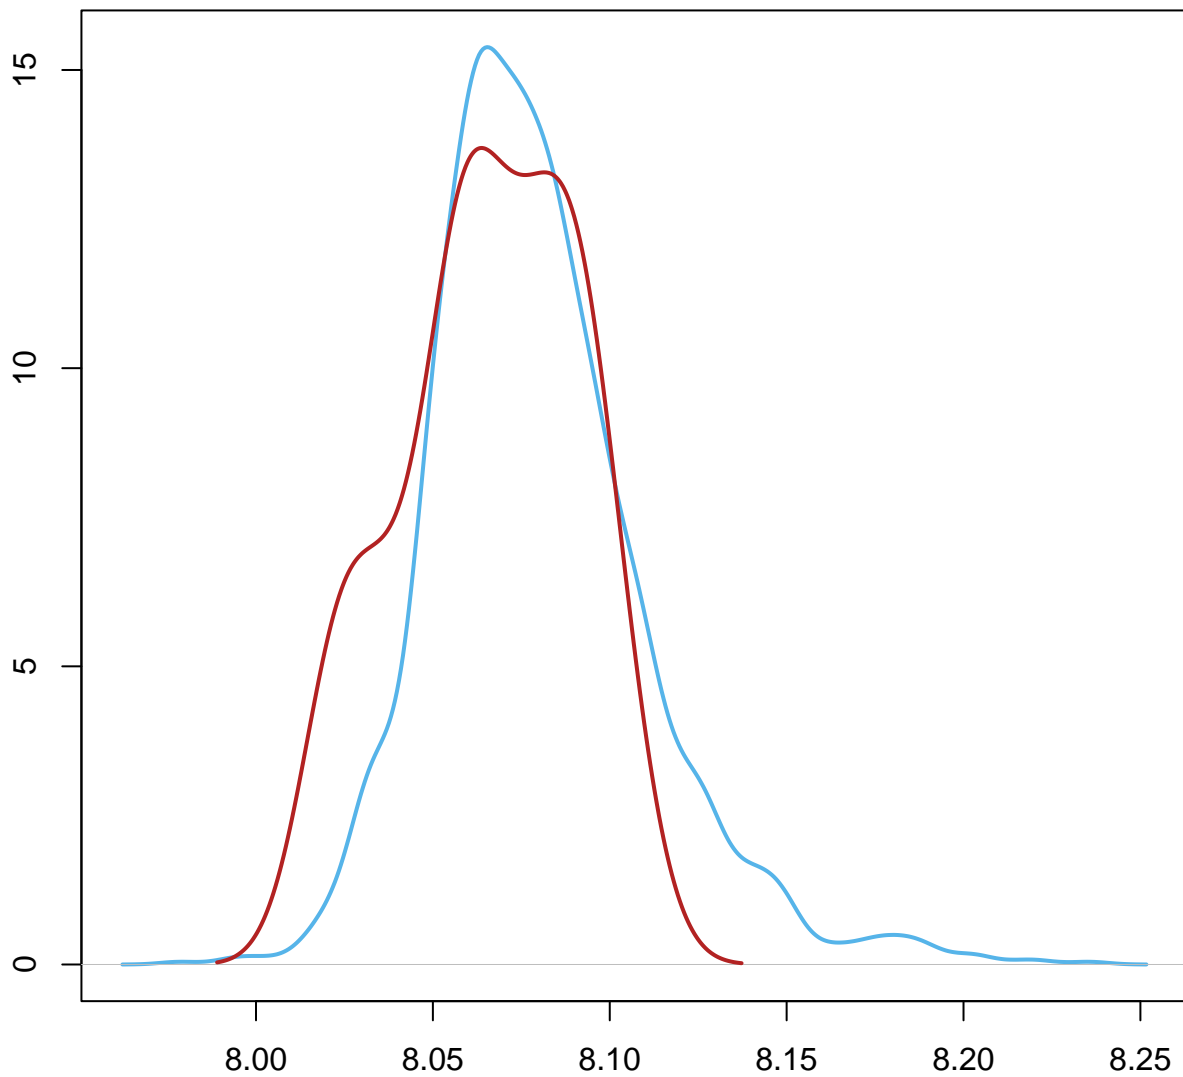

**ln\_Mg**

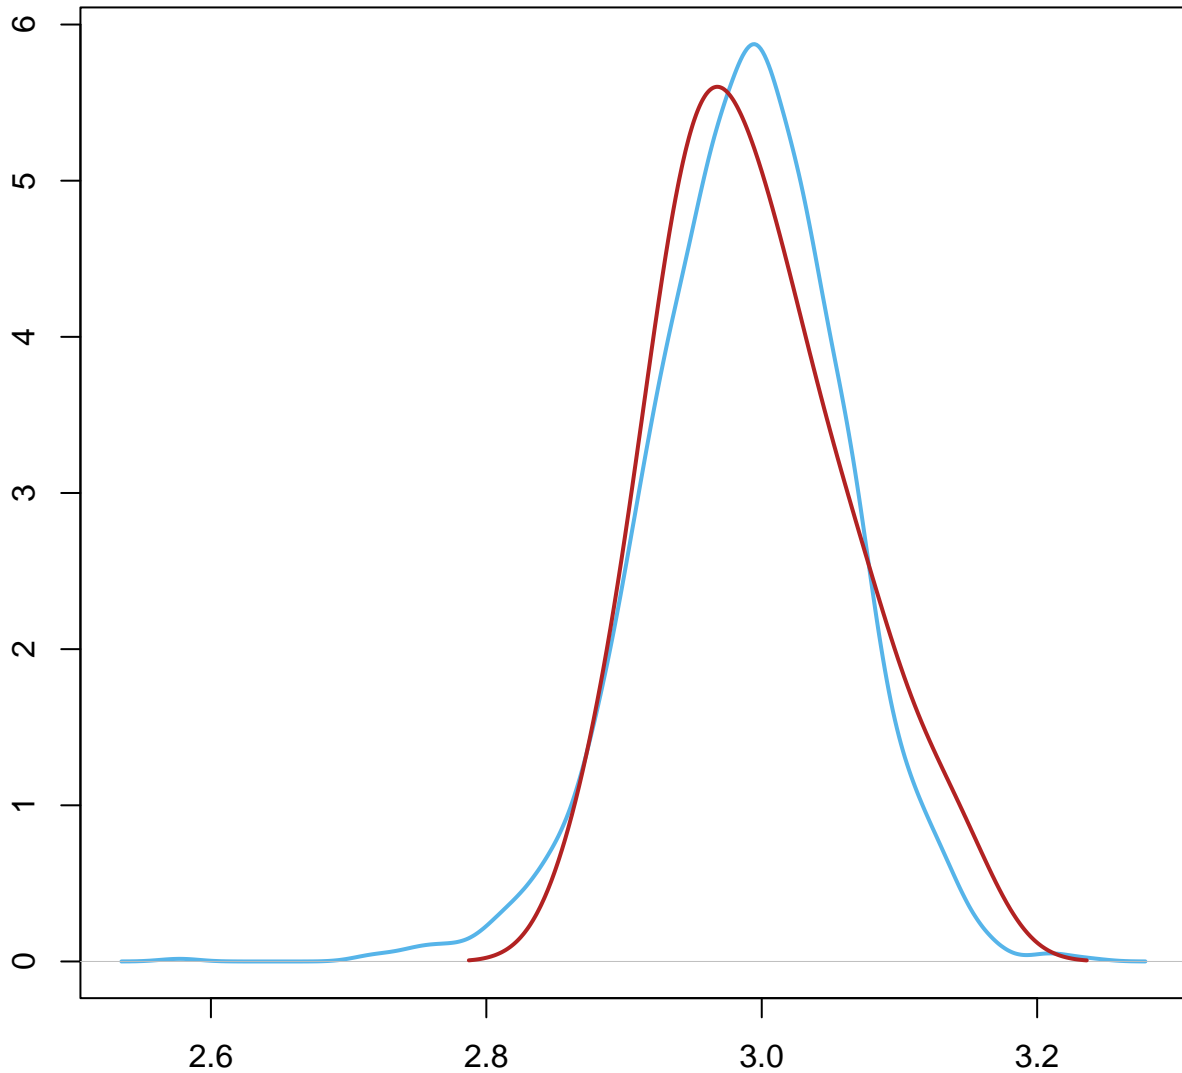

ln\_P

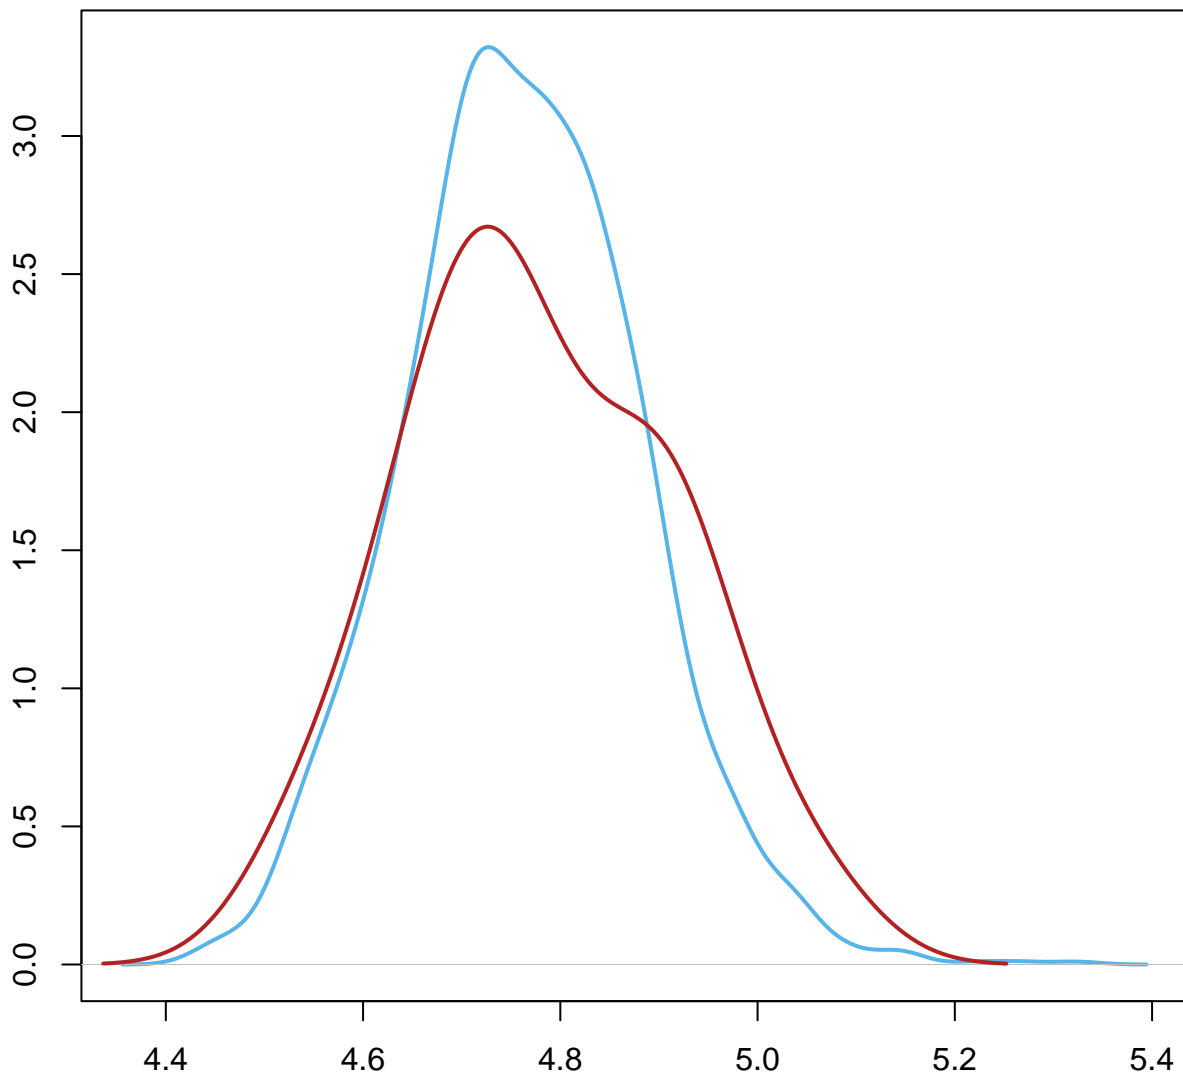

$\ln_S$

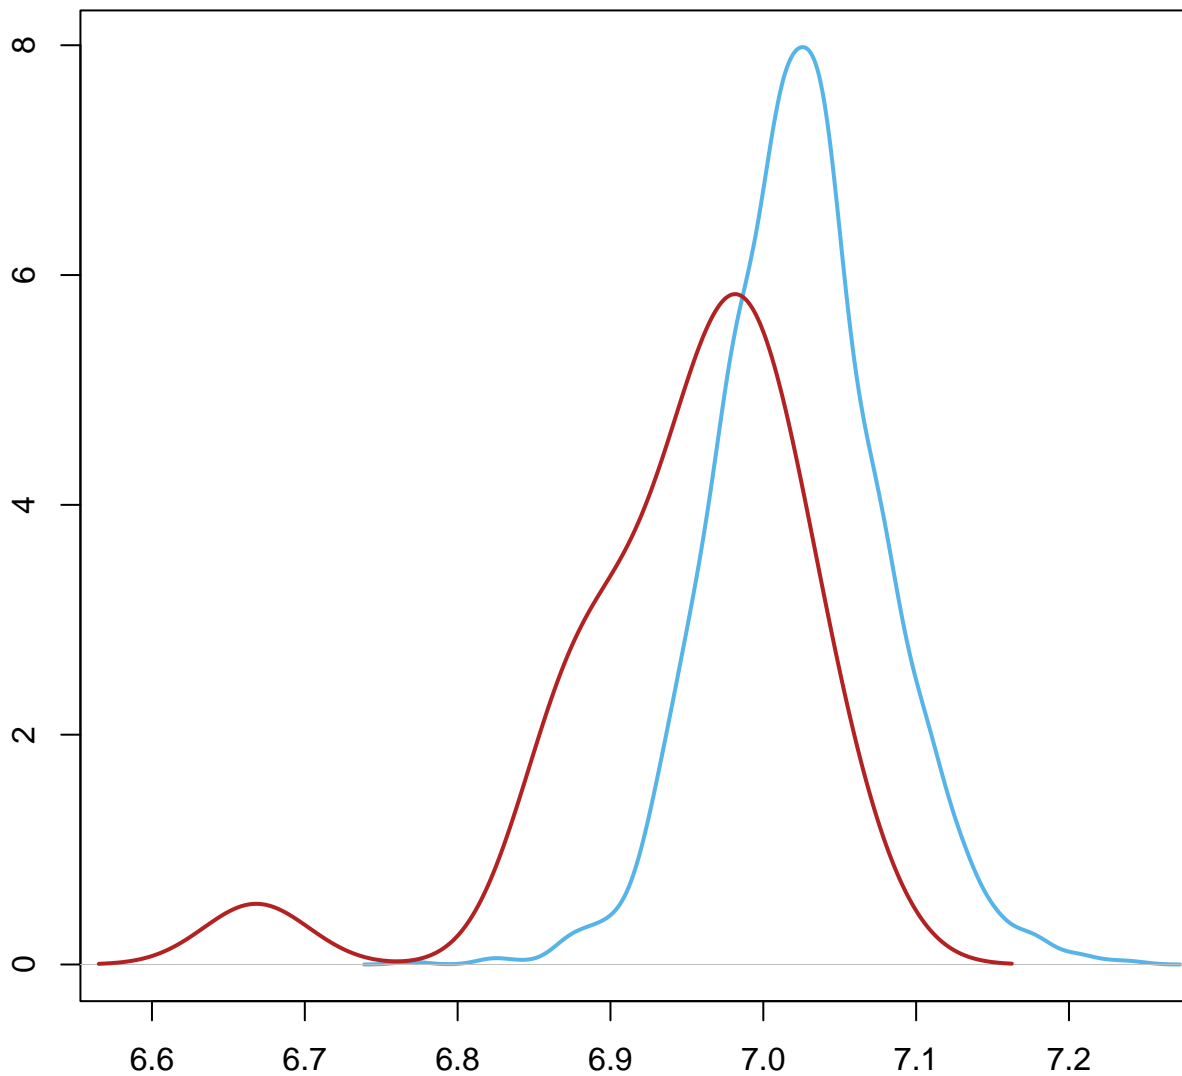

ln\_K

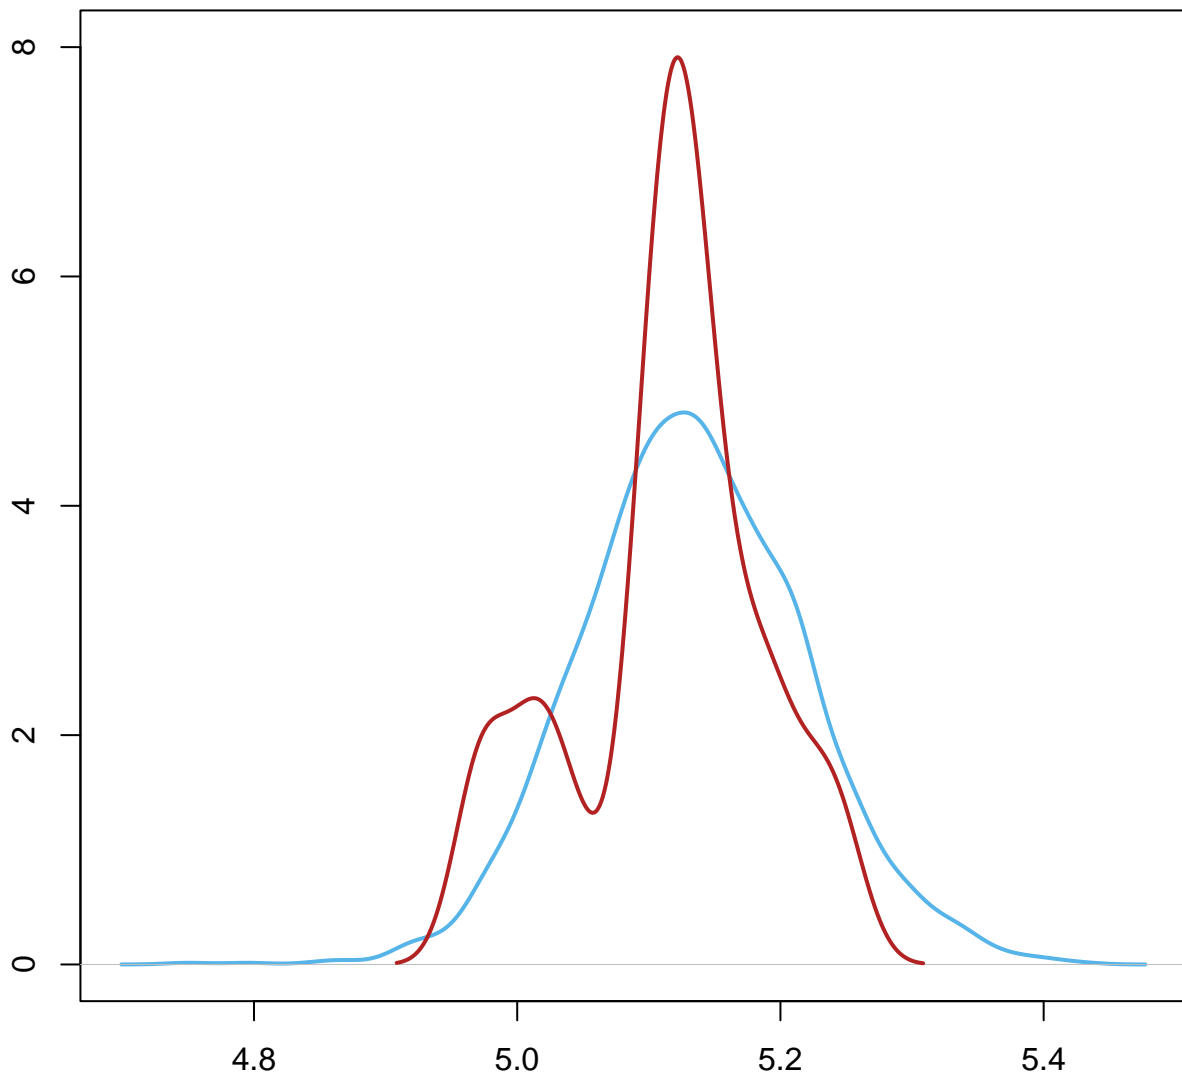

In\_Ca

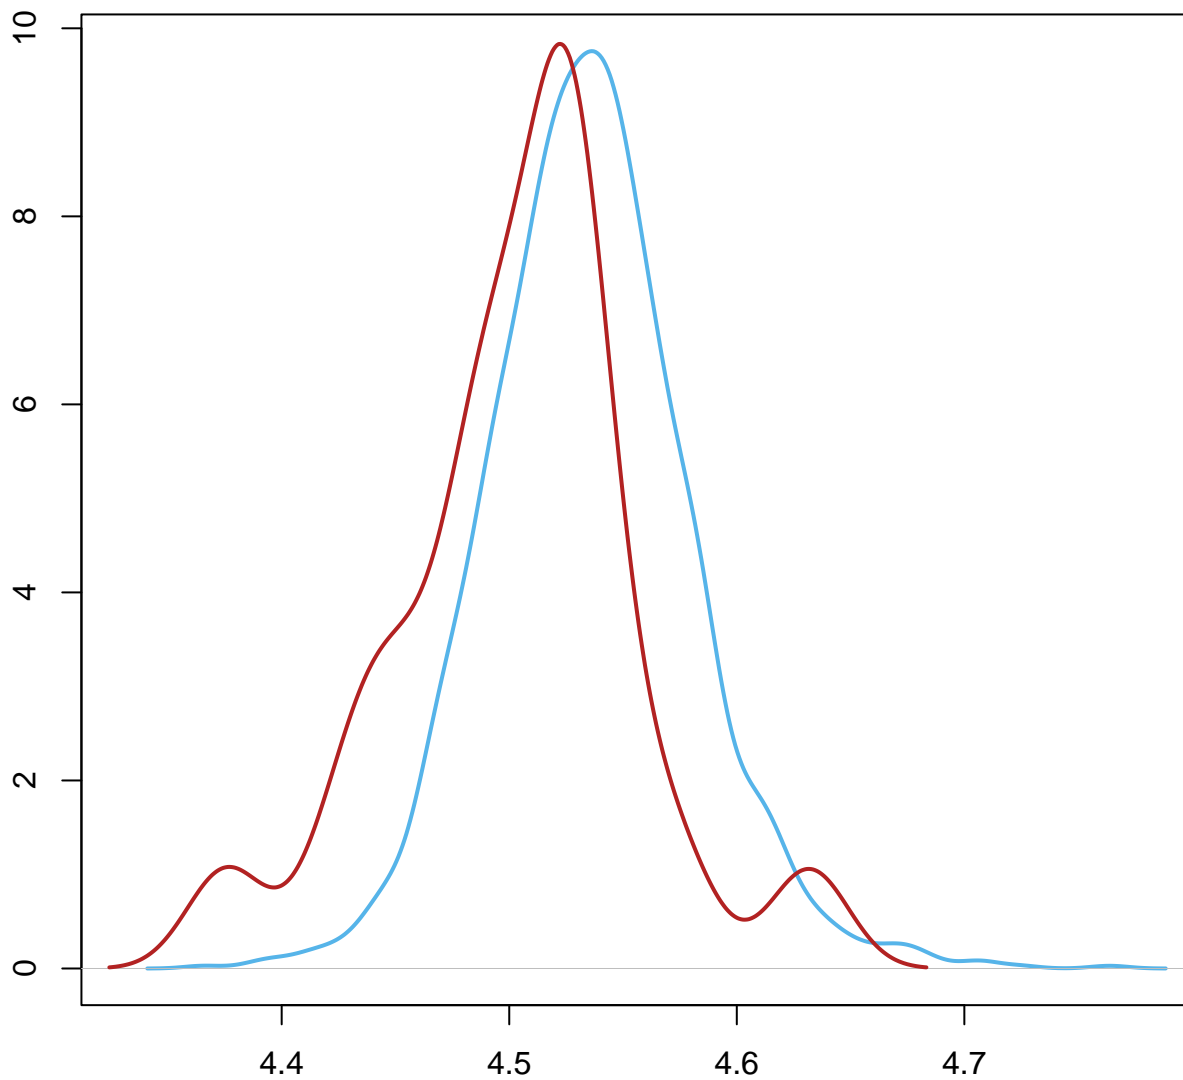

**In\_Fe**

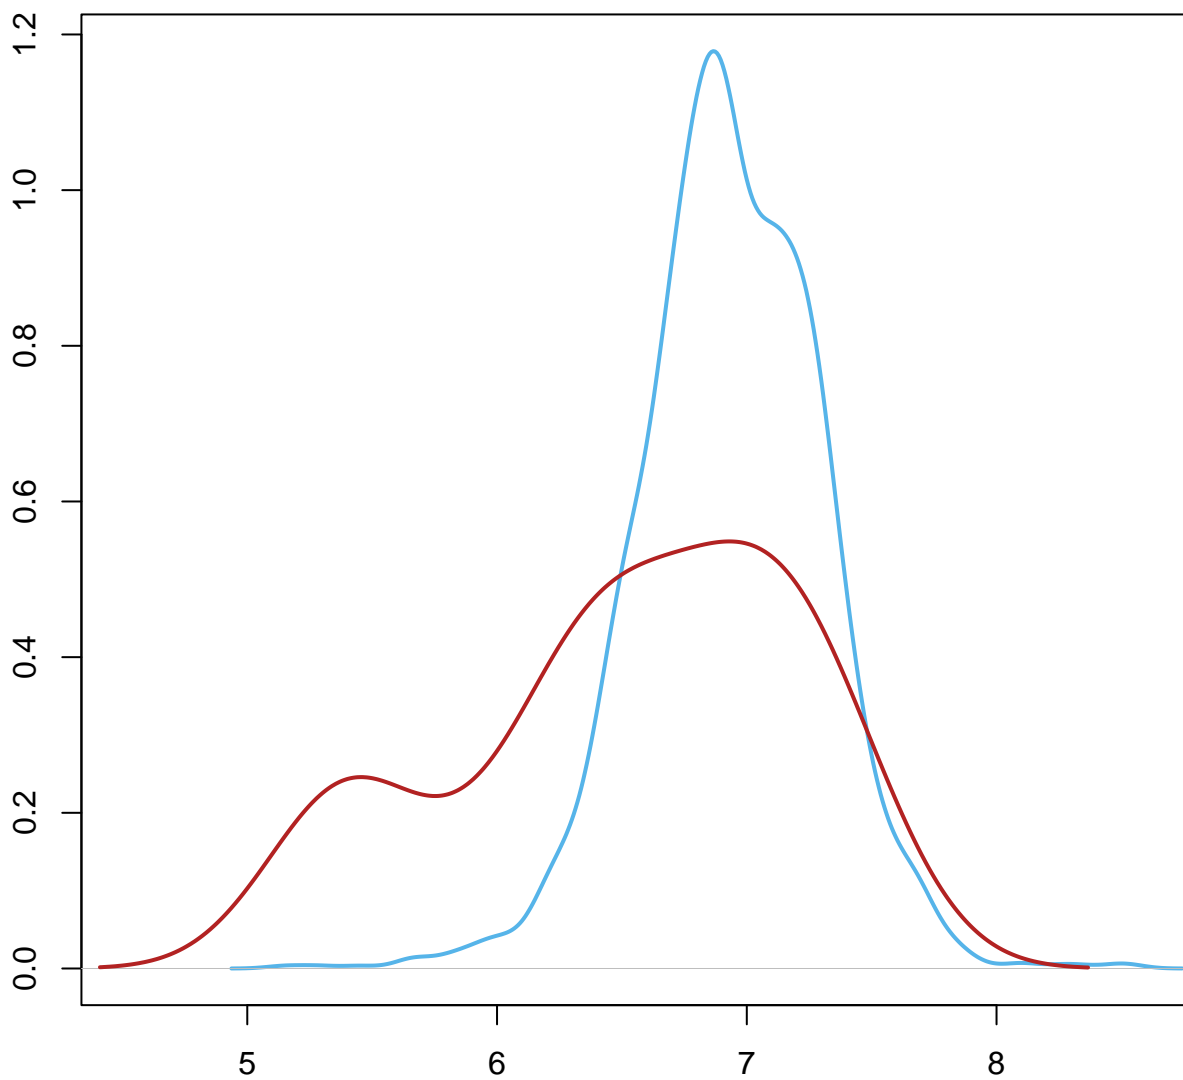

ln\_Co

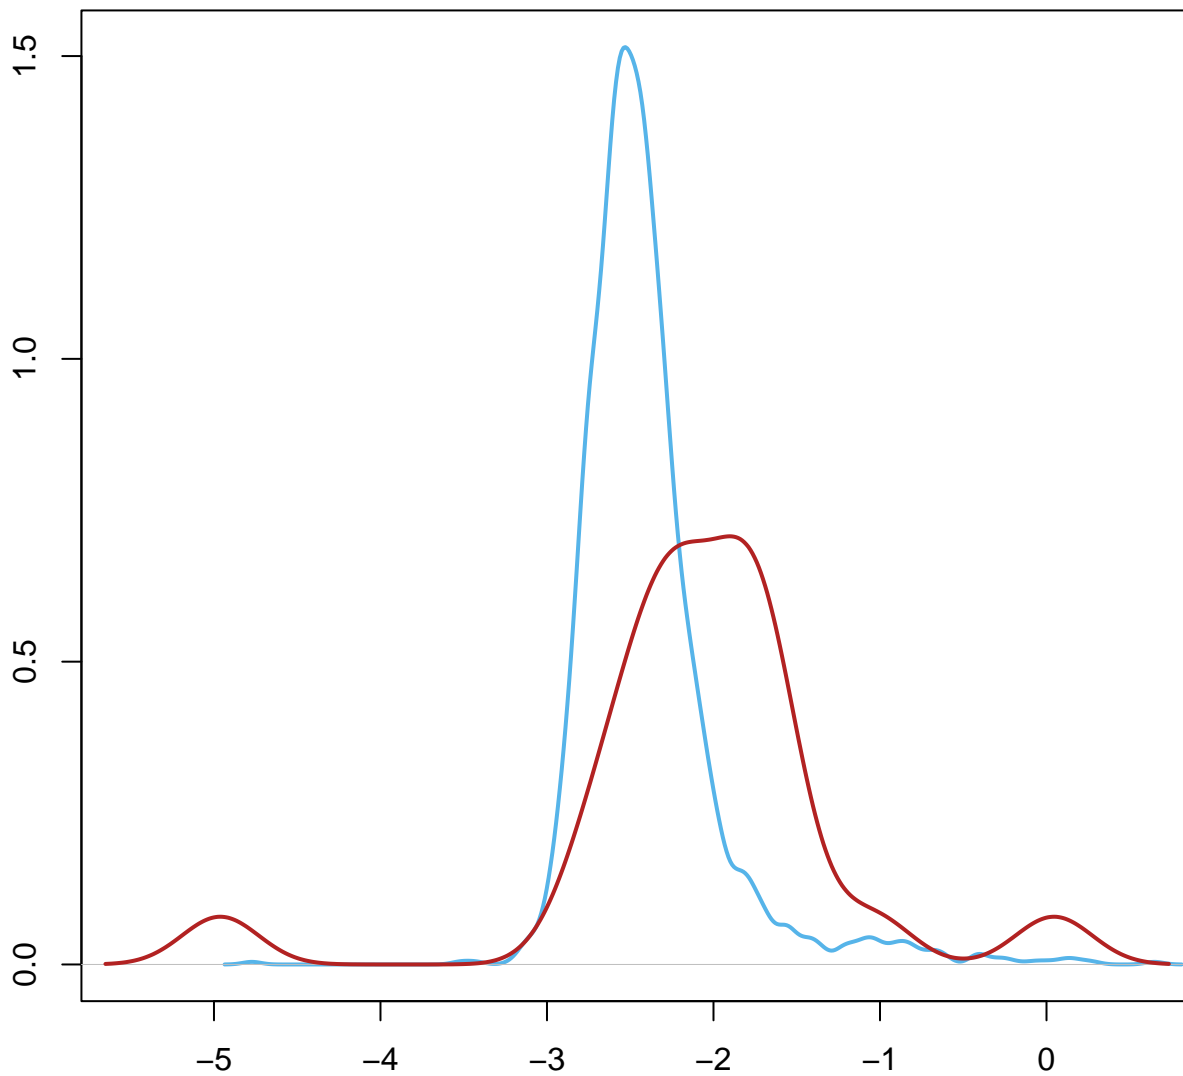



In\_Cu

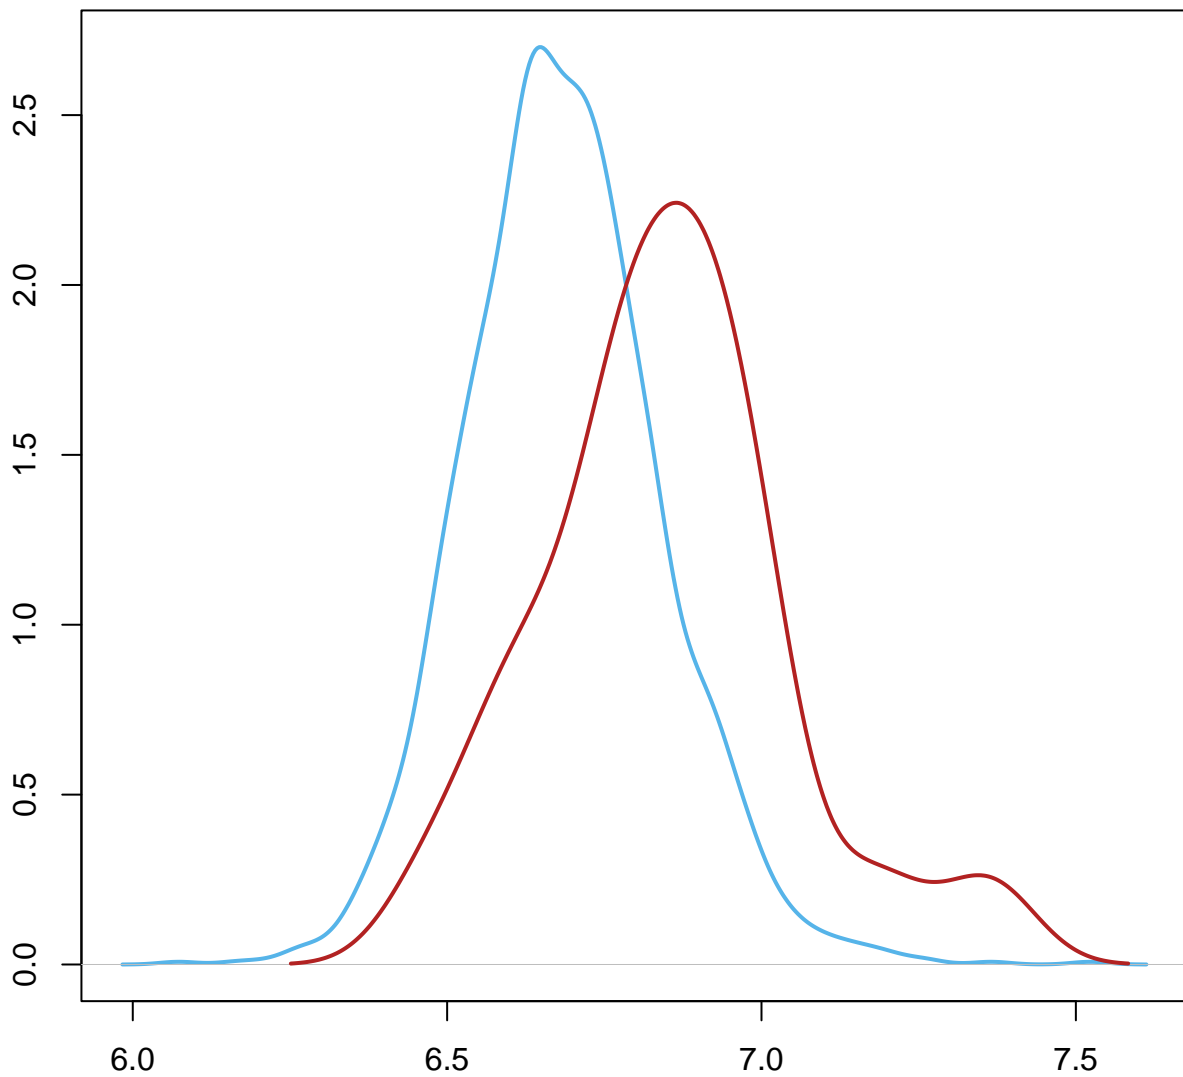

ln\_Zn

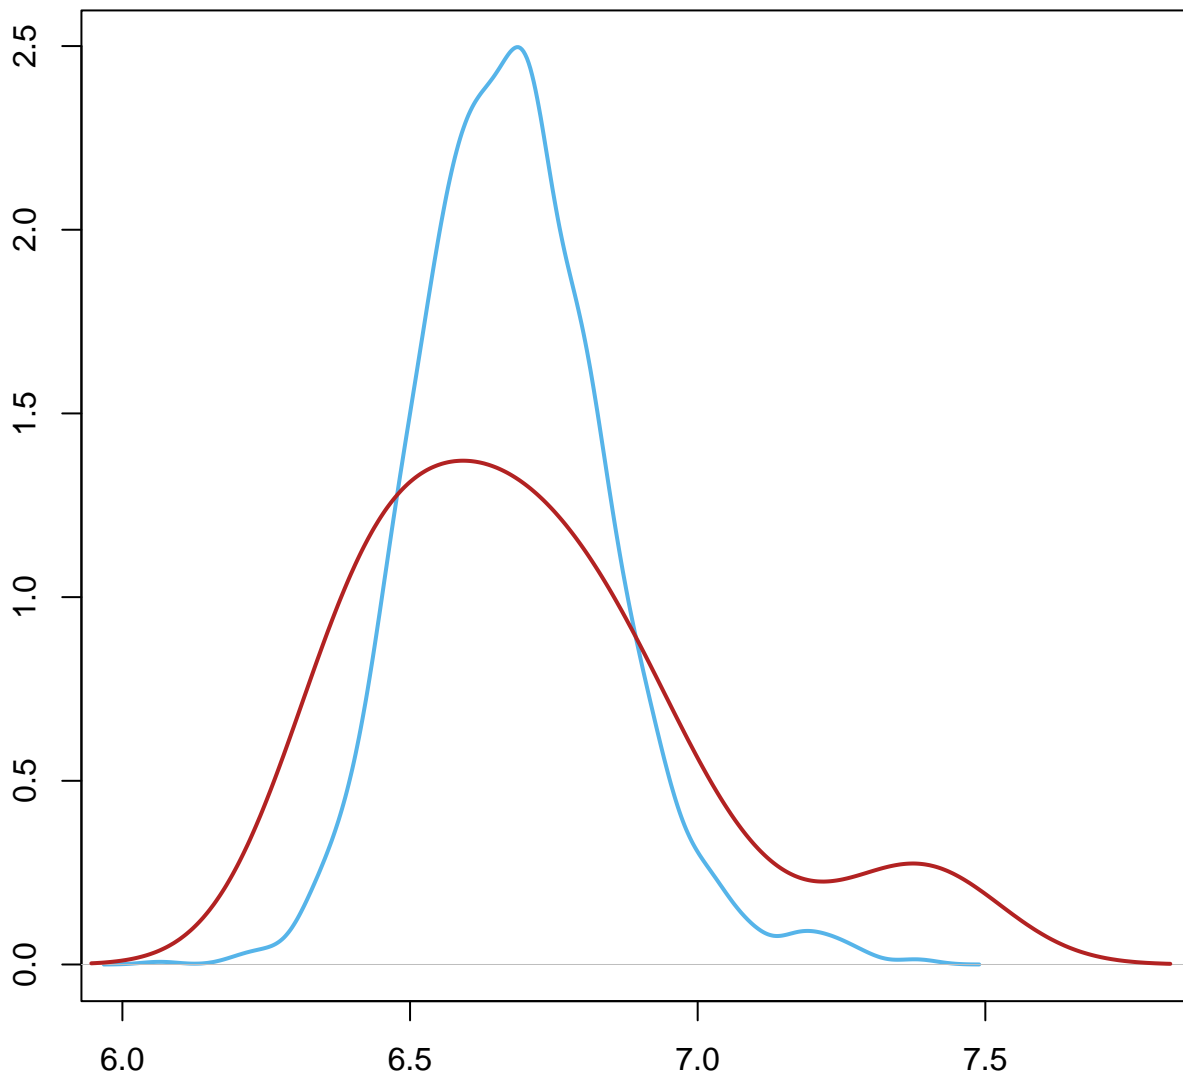

ln\_As

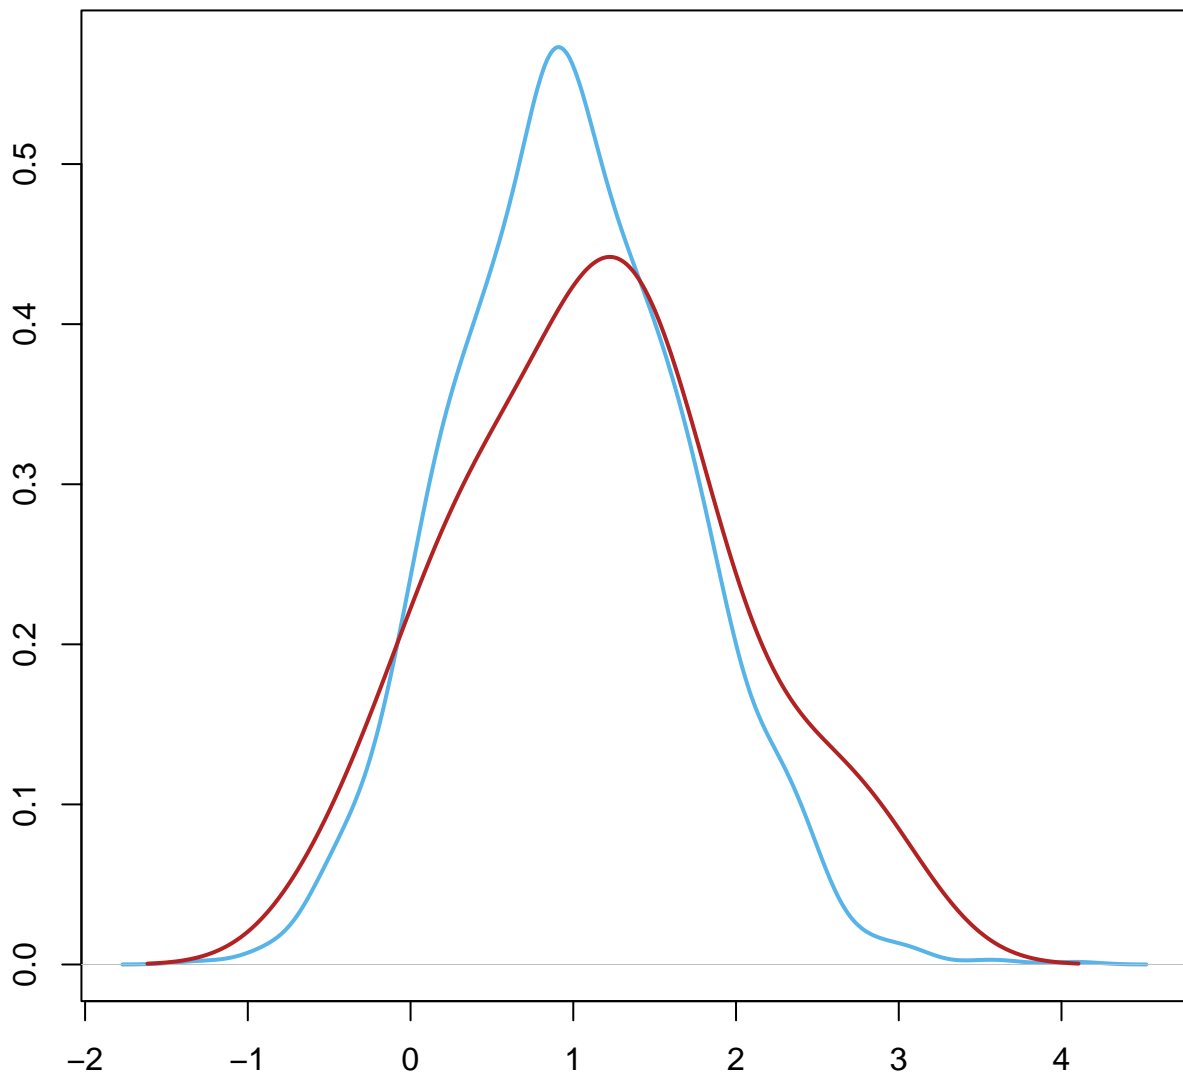

In\_Se

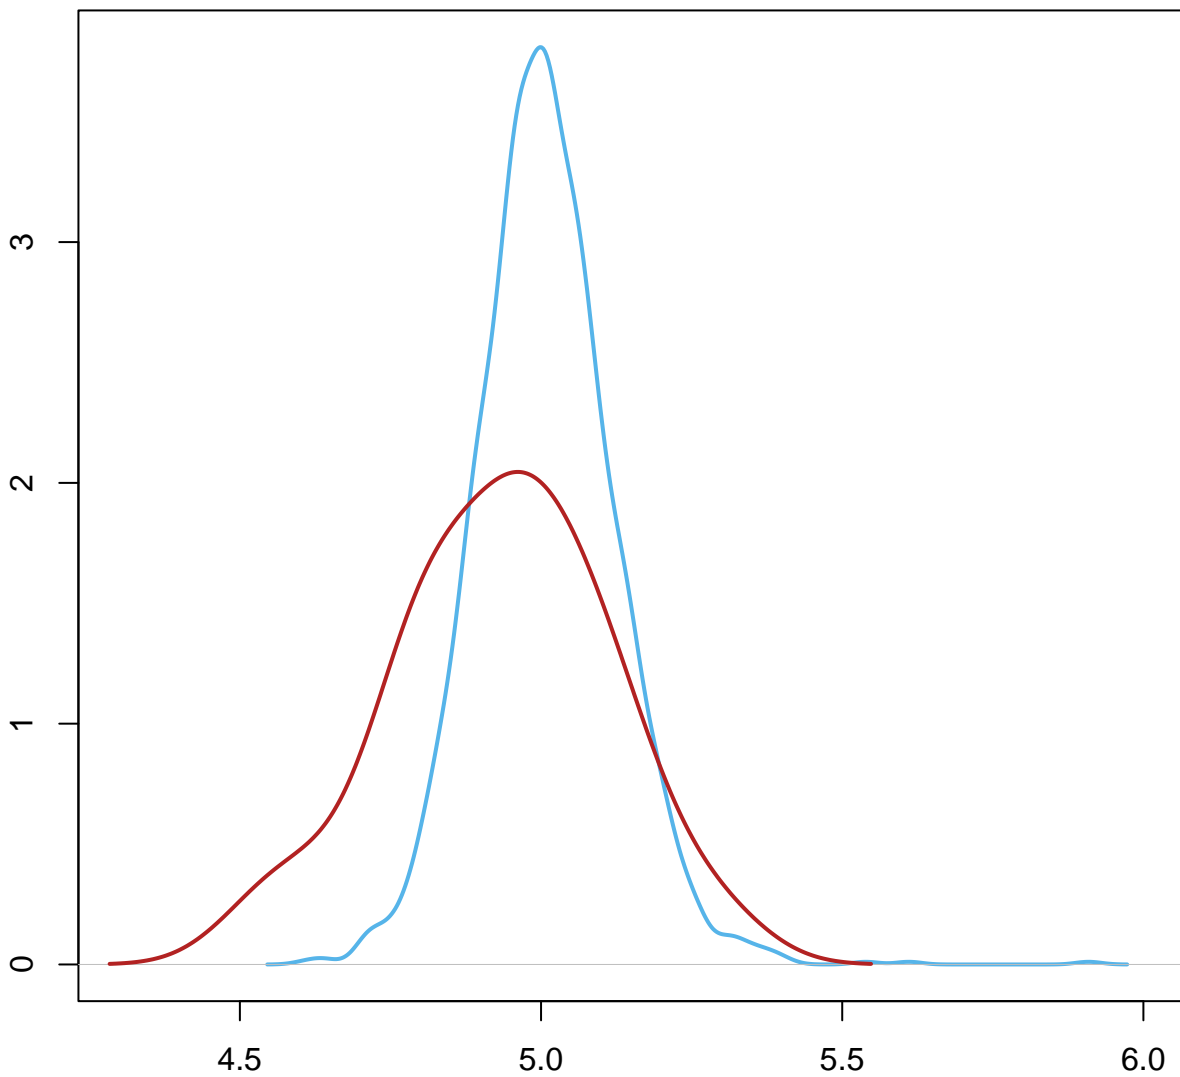

In\_Rb

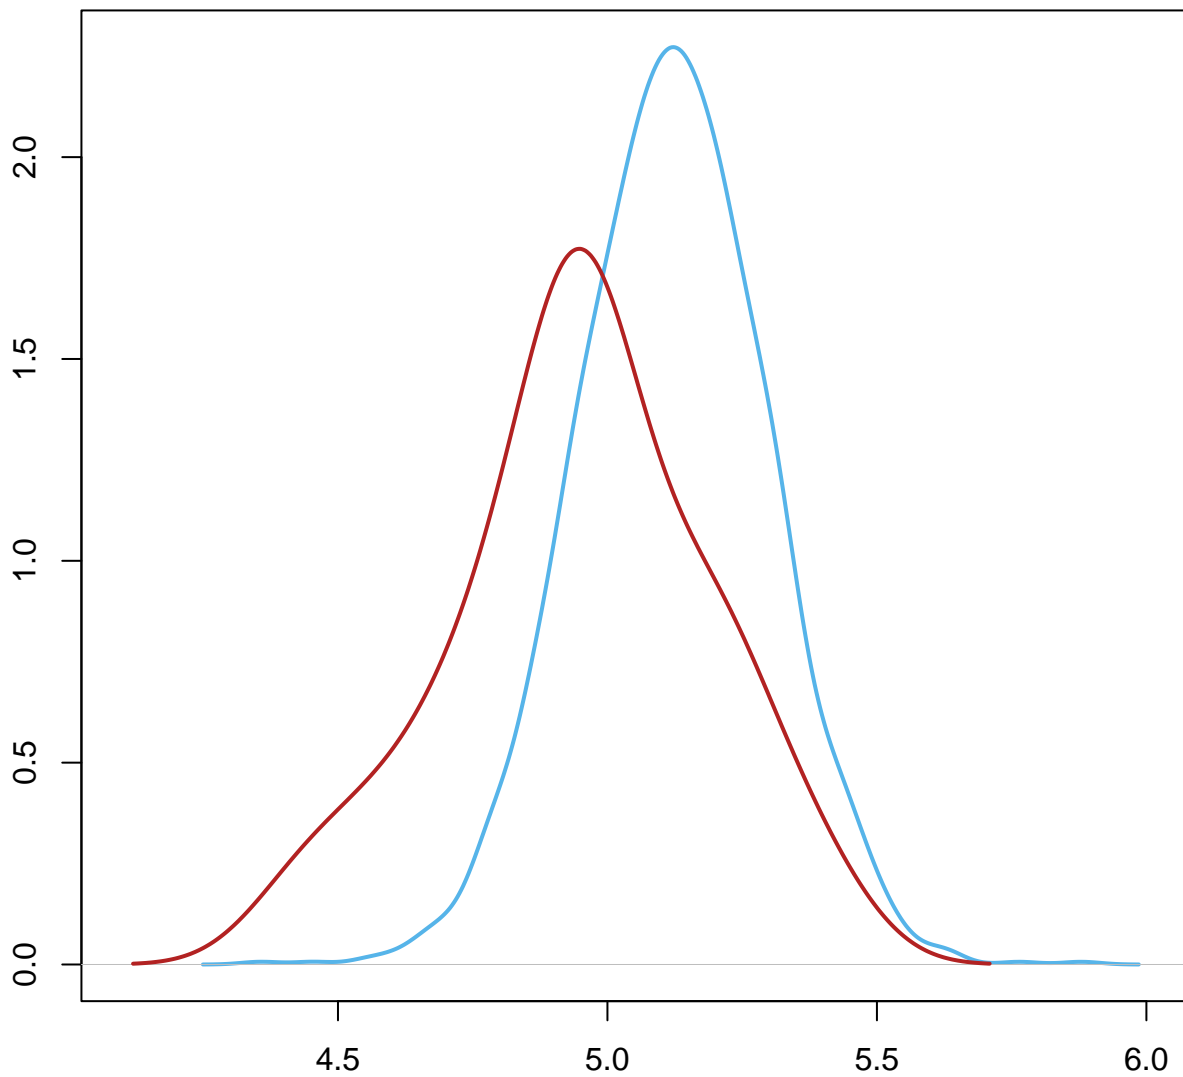

ln\_Sr

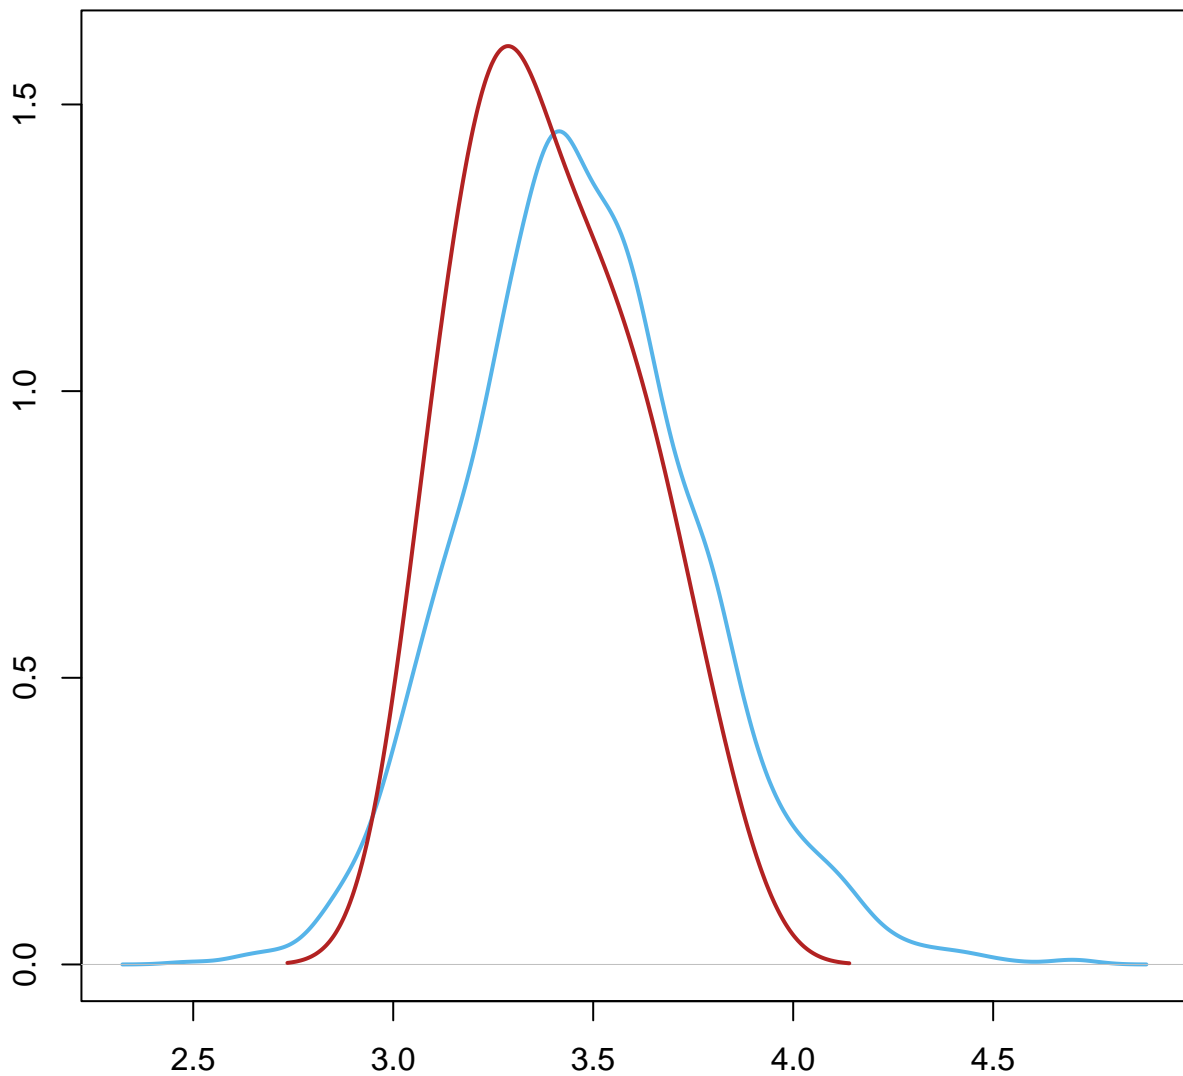

In\_Mo

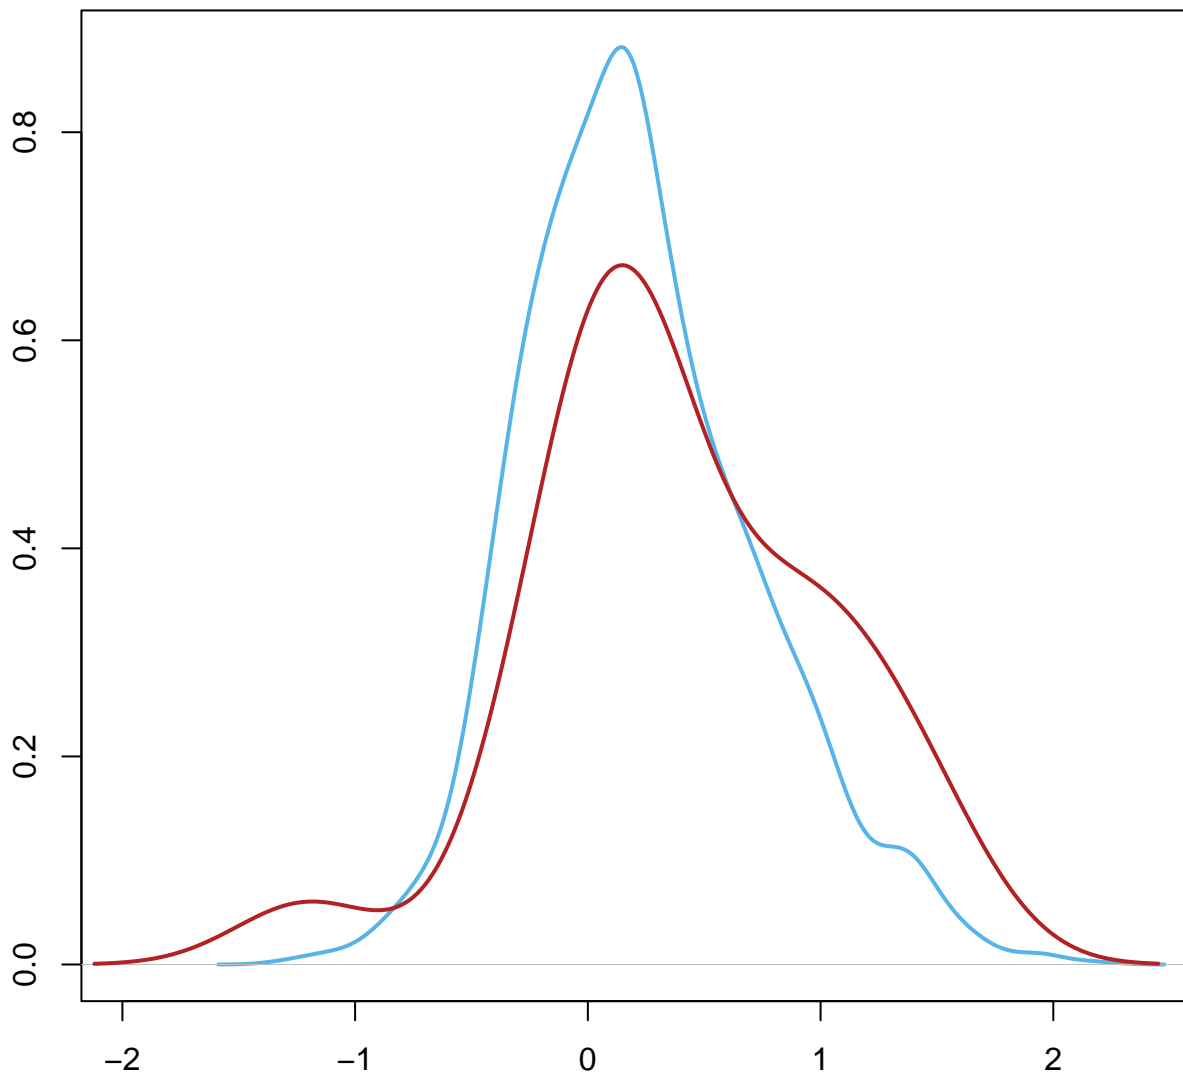

In\_Ag

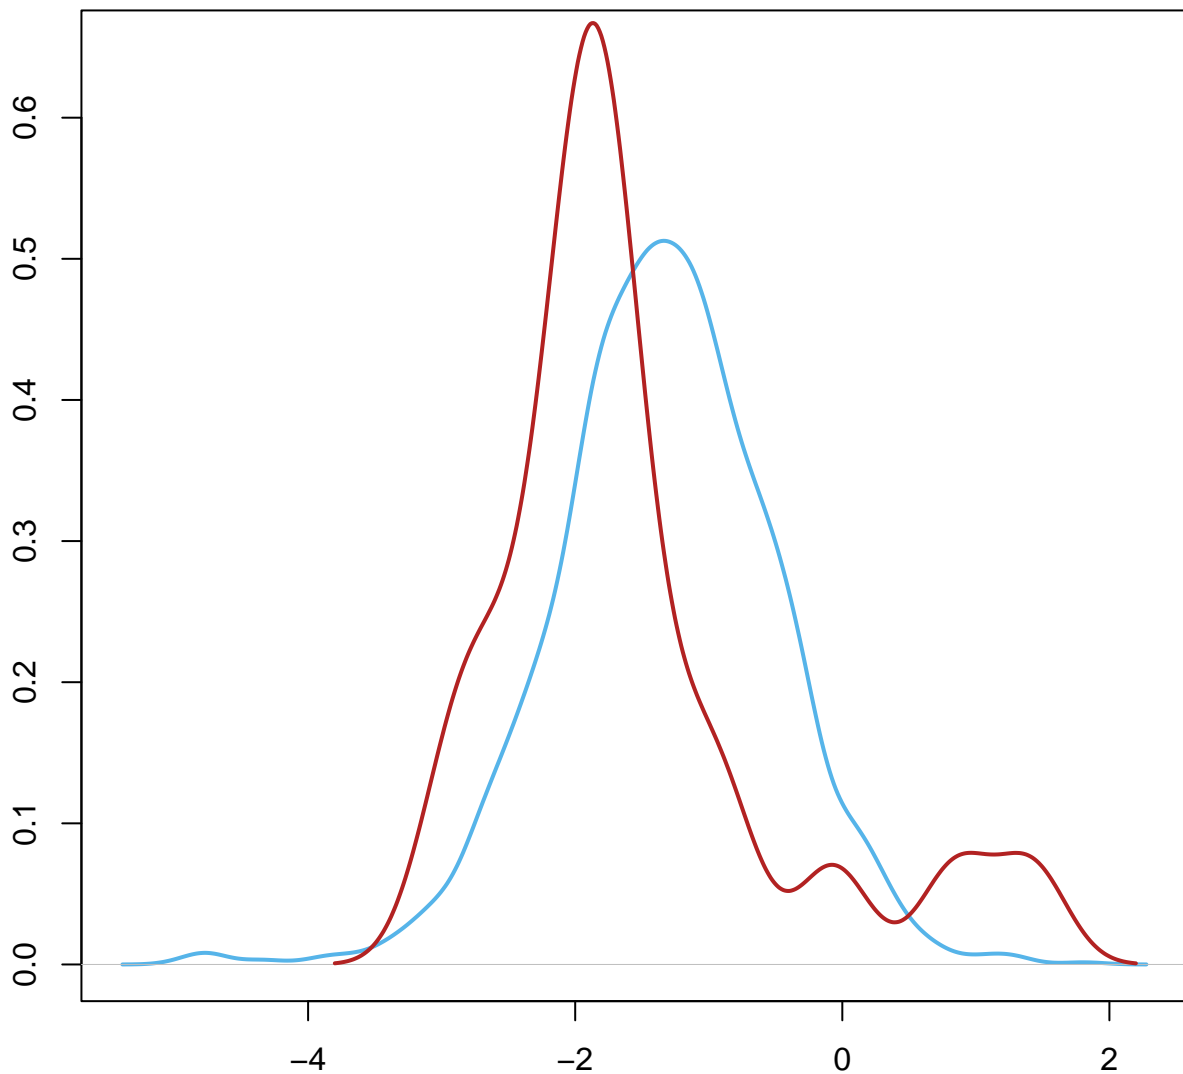



**ln\_Cs**

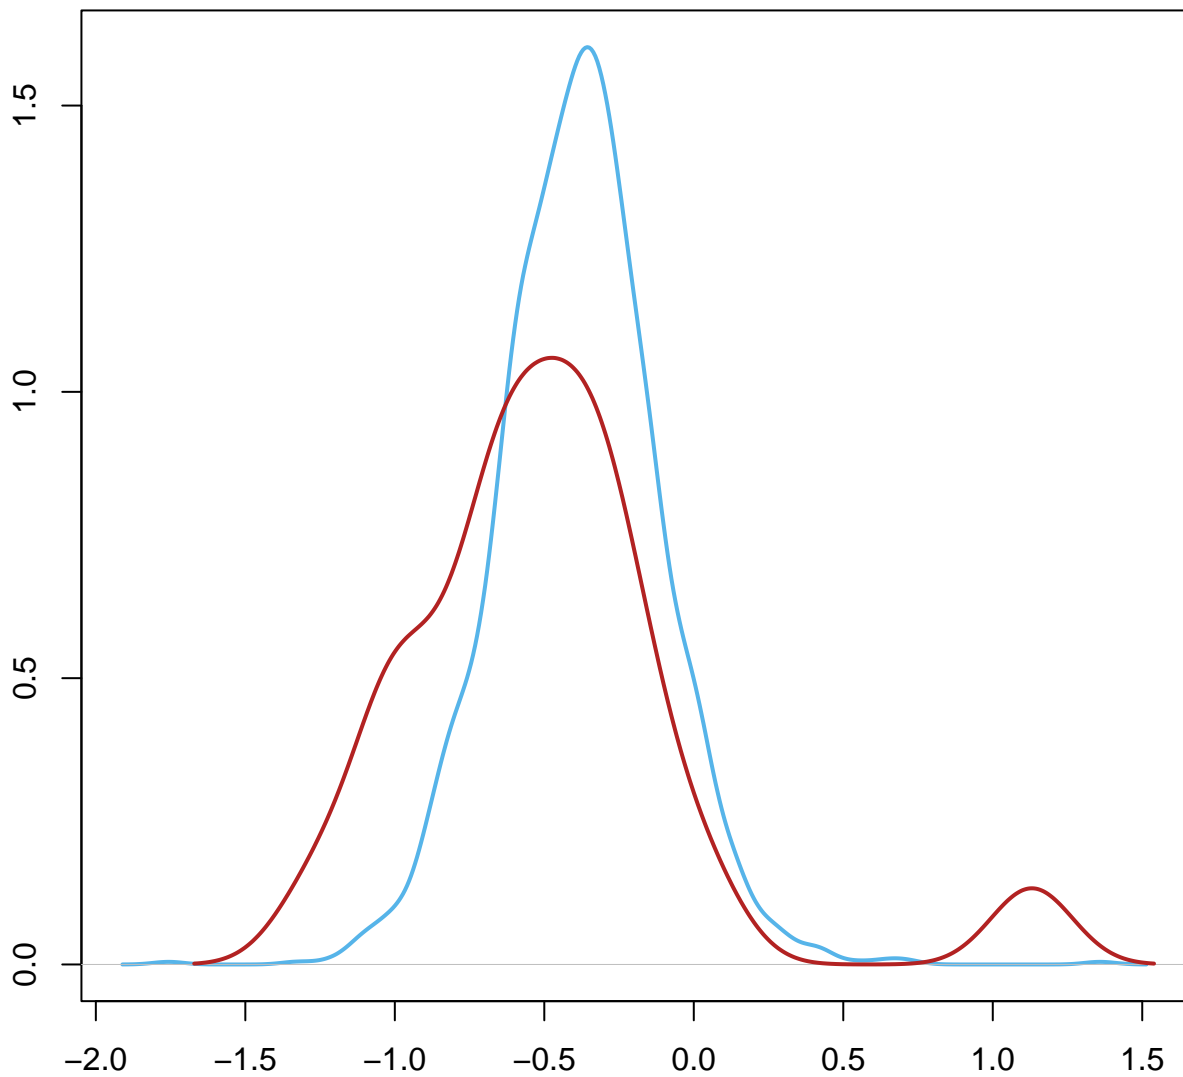

Supplement: Supporting_Figure_1.zip [file Supporting_Figure_1.zip]

In\_Na

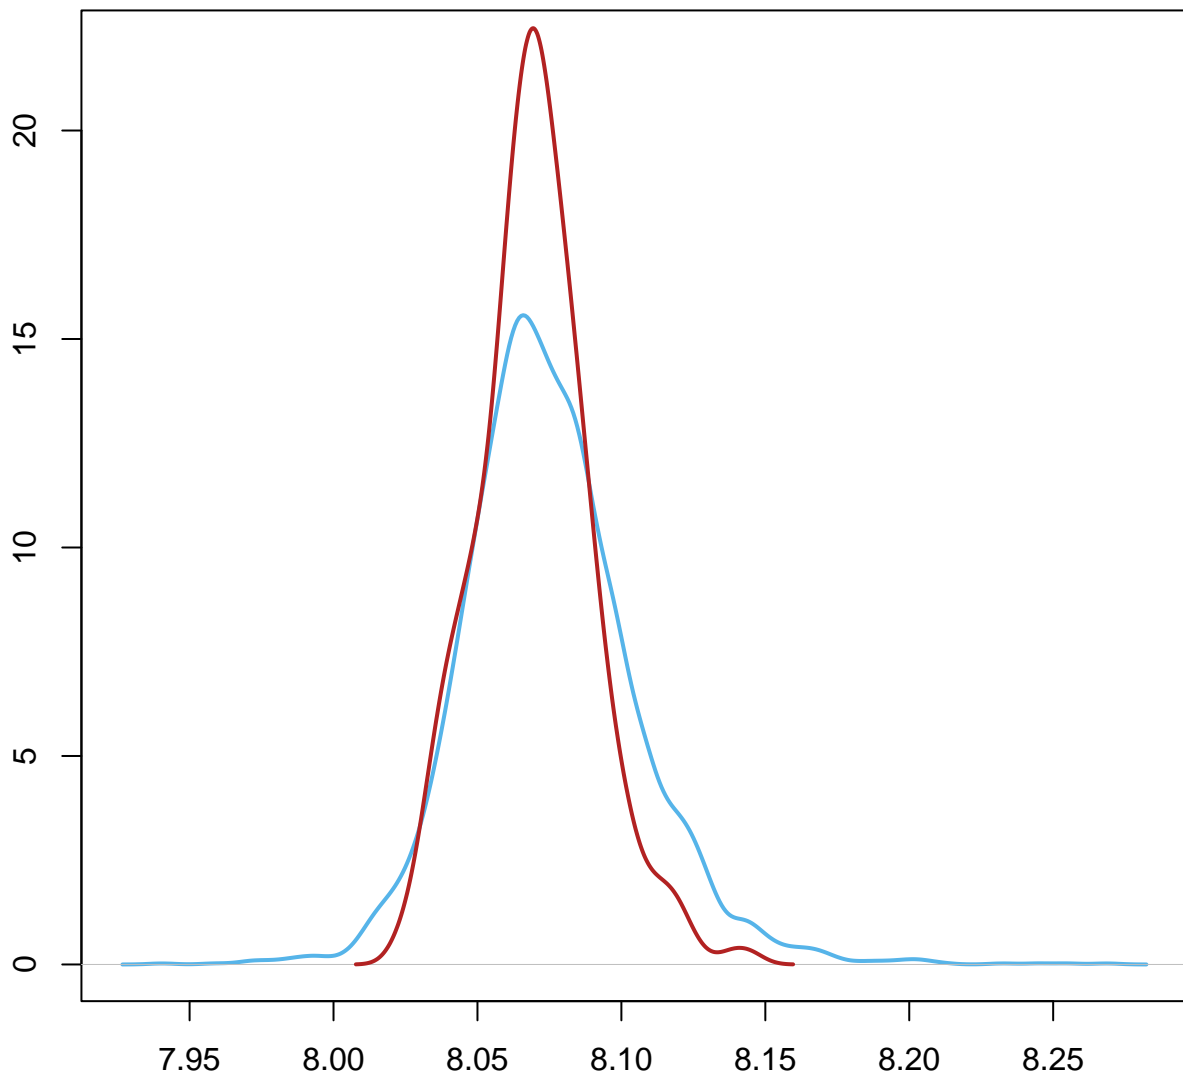

**ln\_Mg**

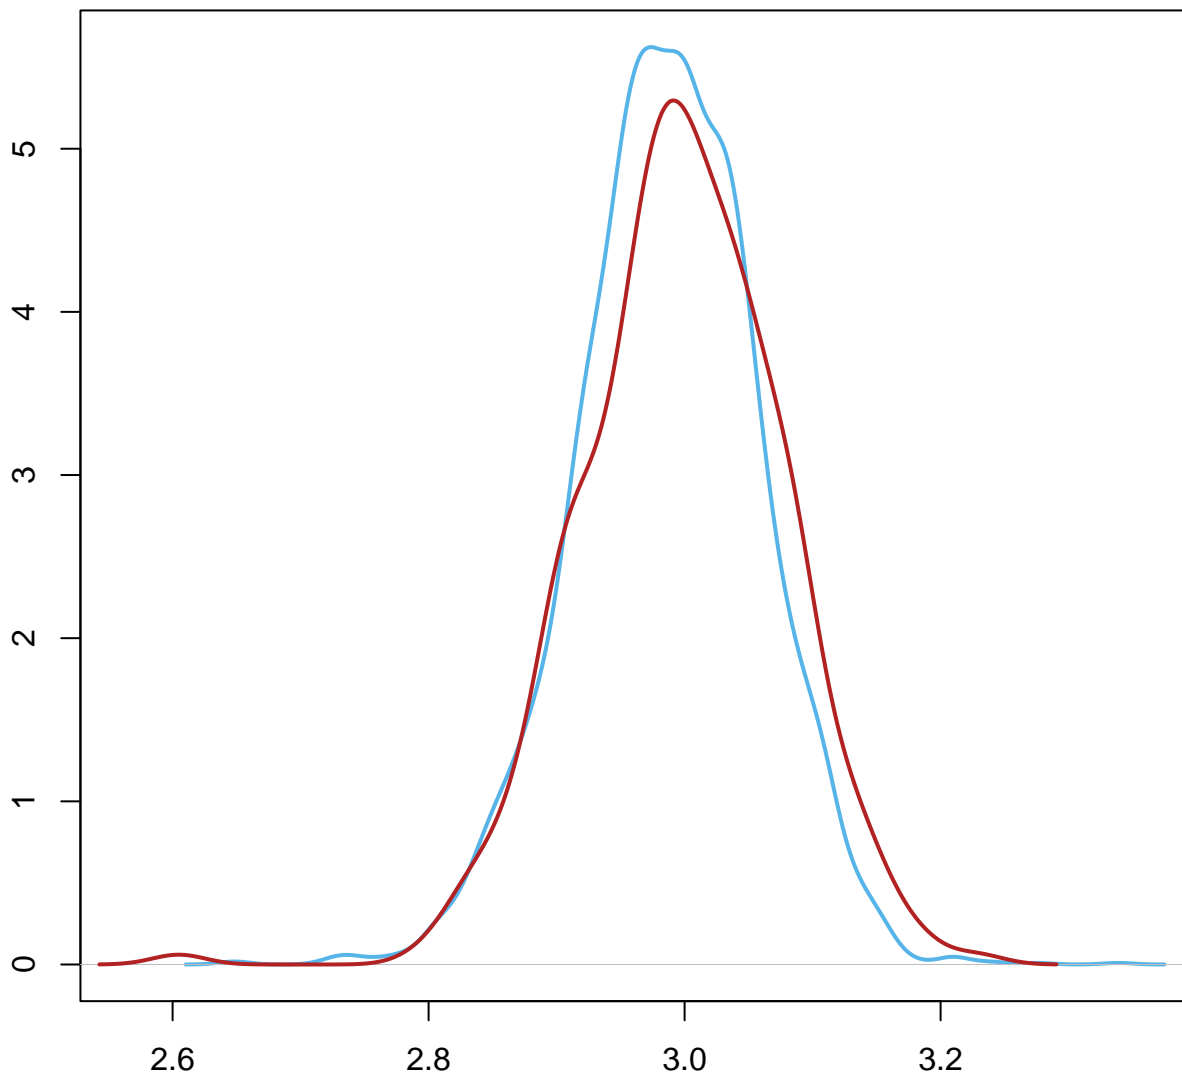

ln\_P

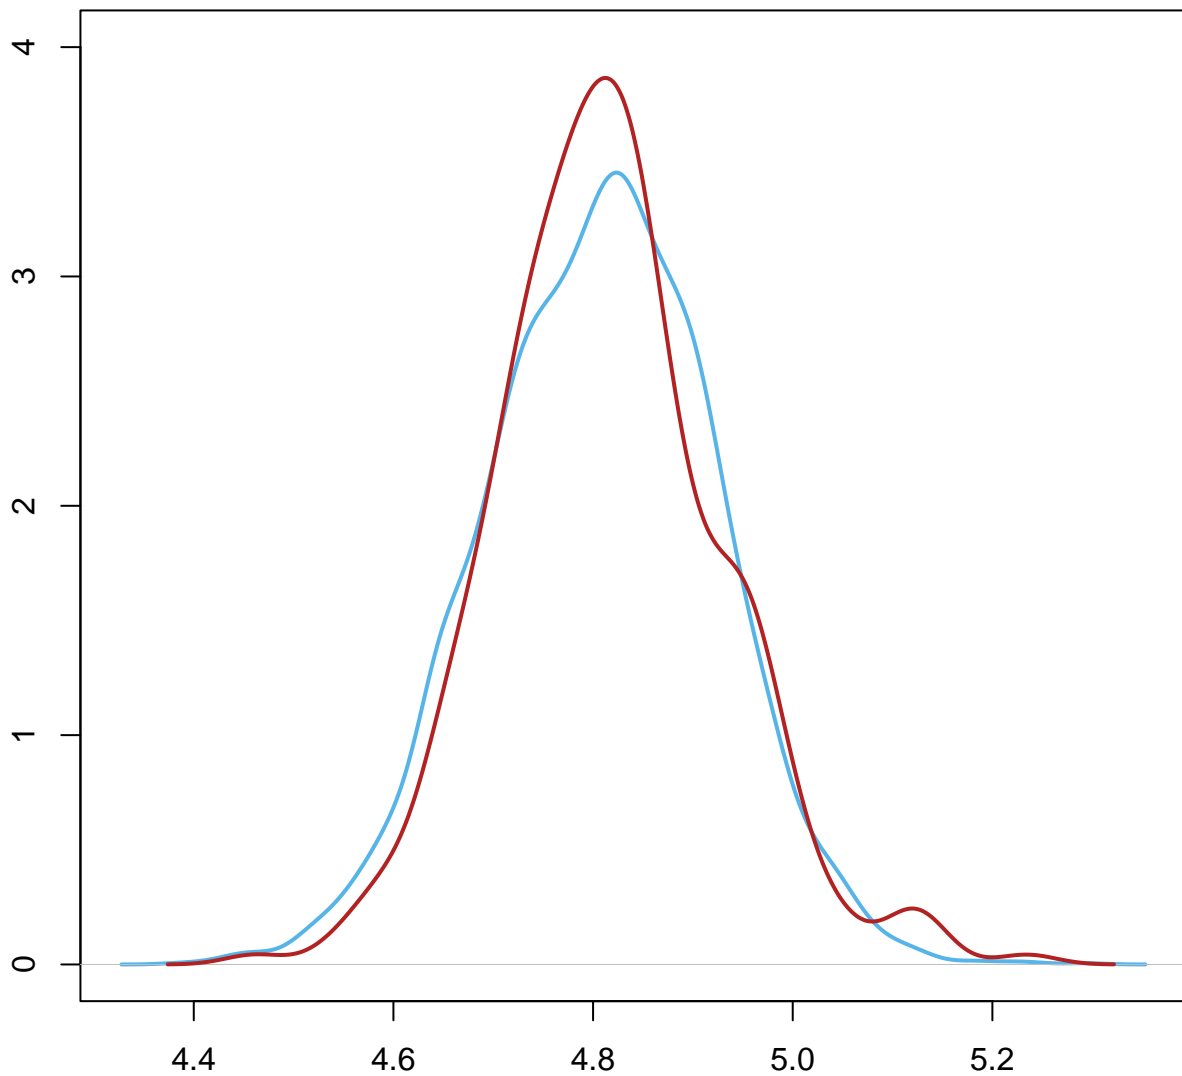

$\ln_S$

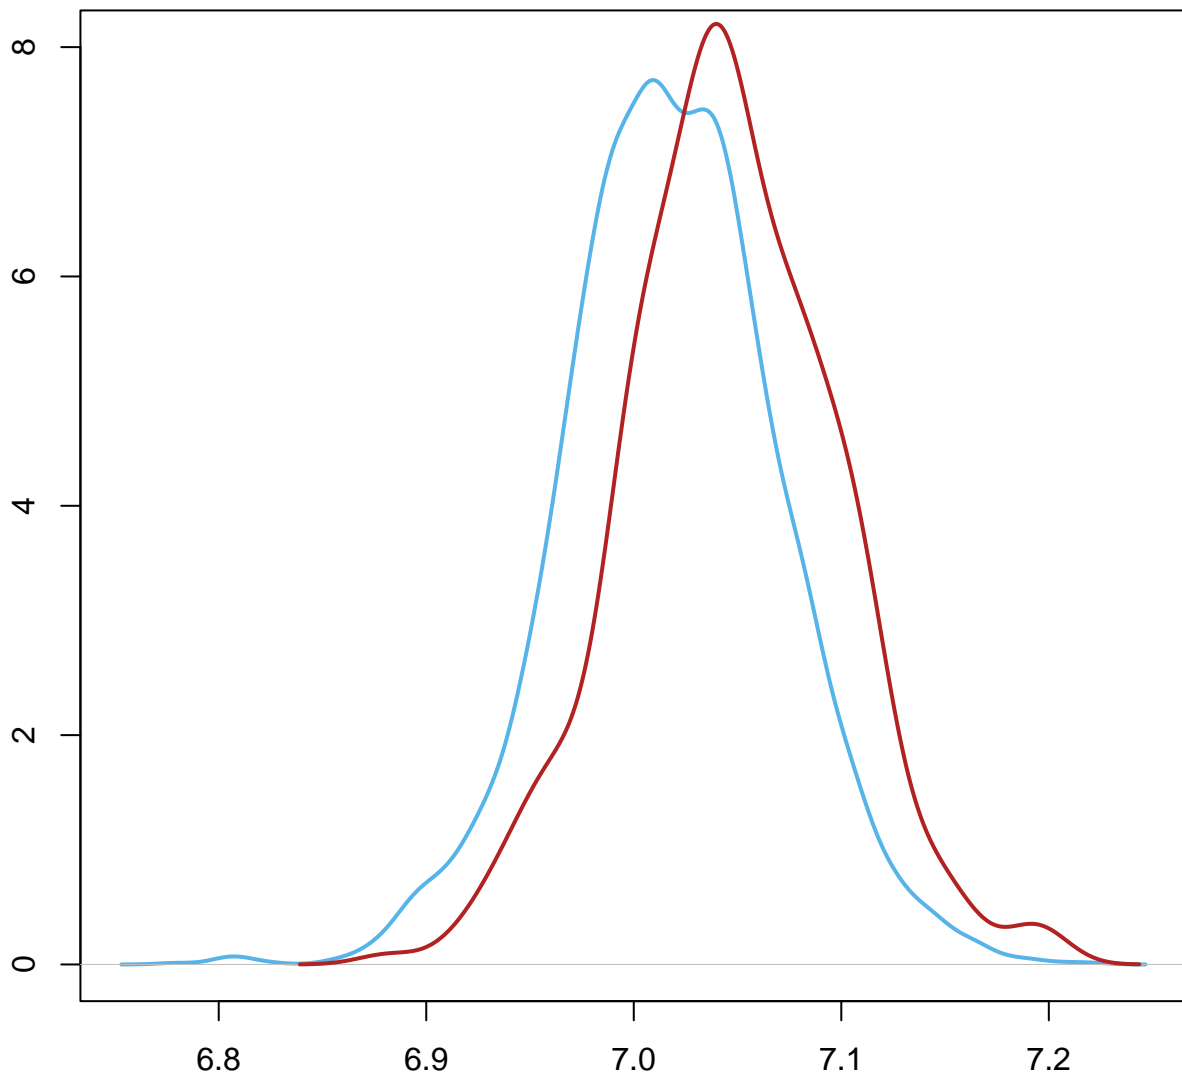

ln\_K

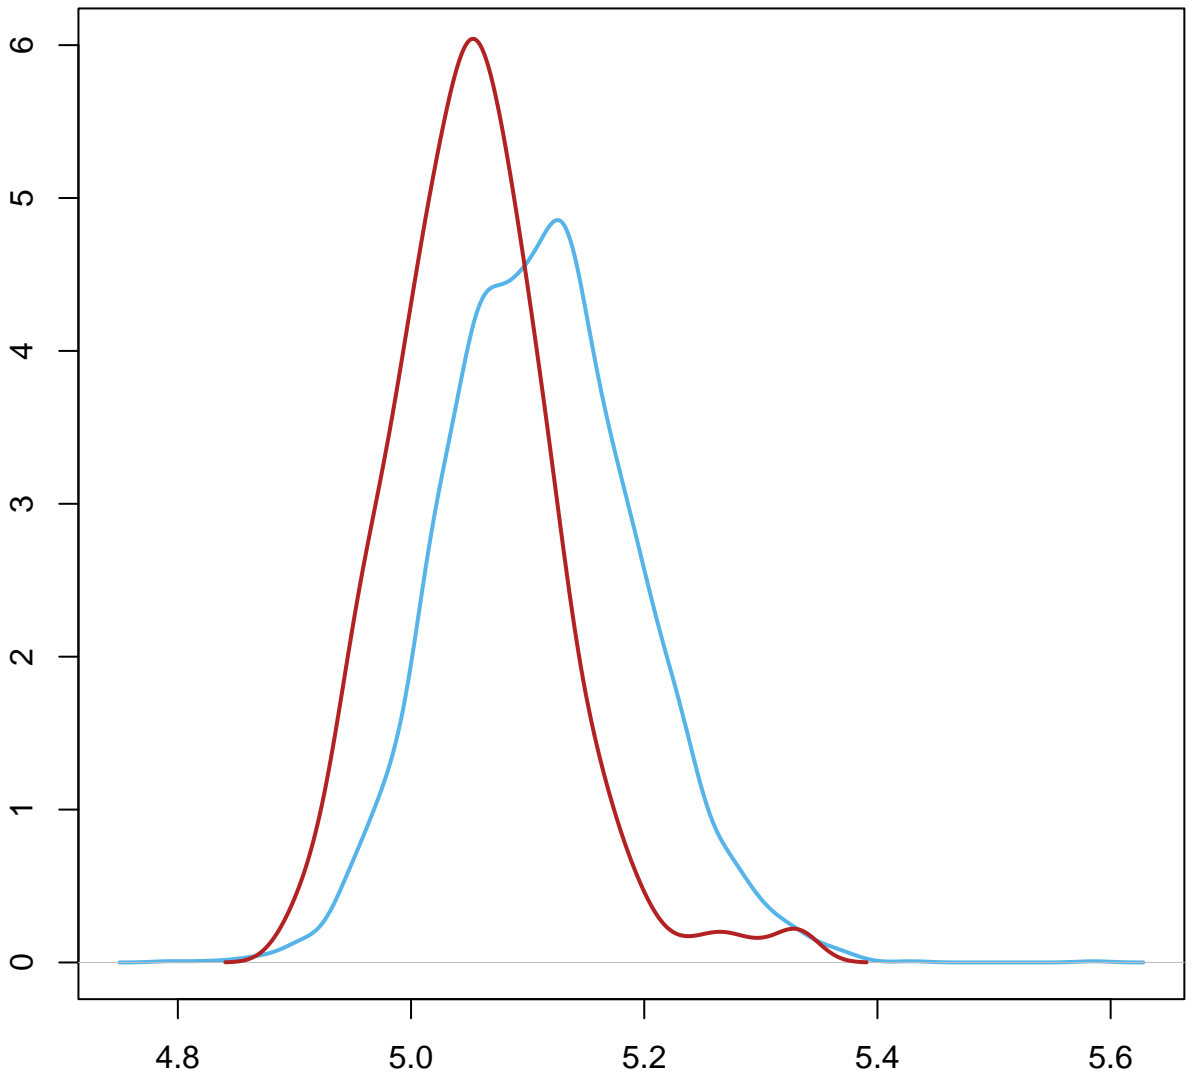

In\_Ca

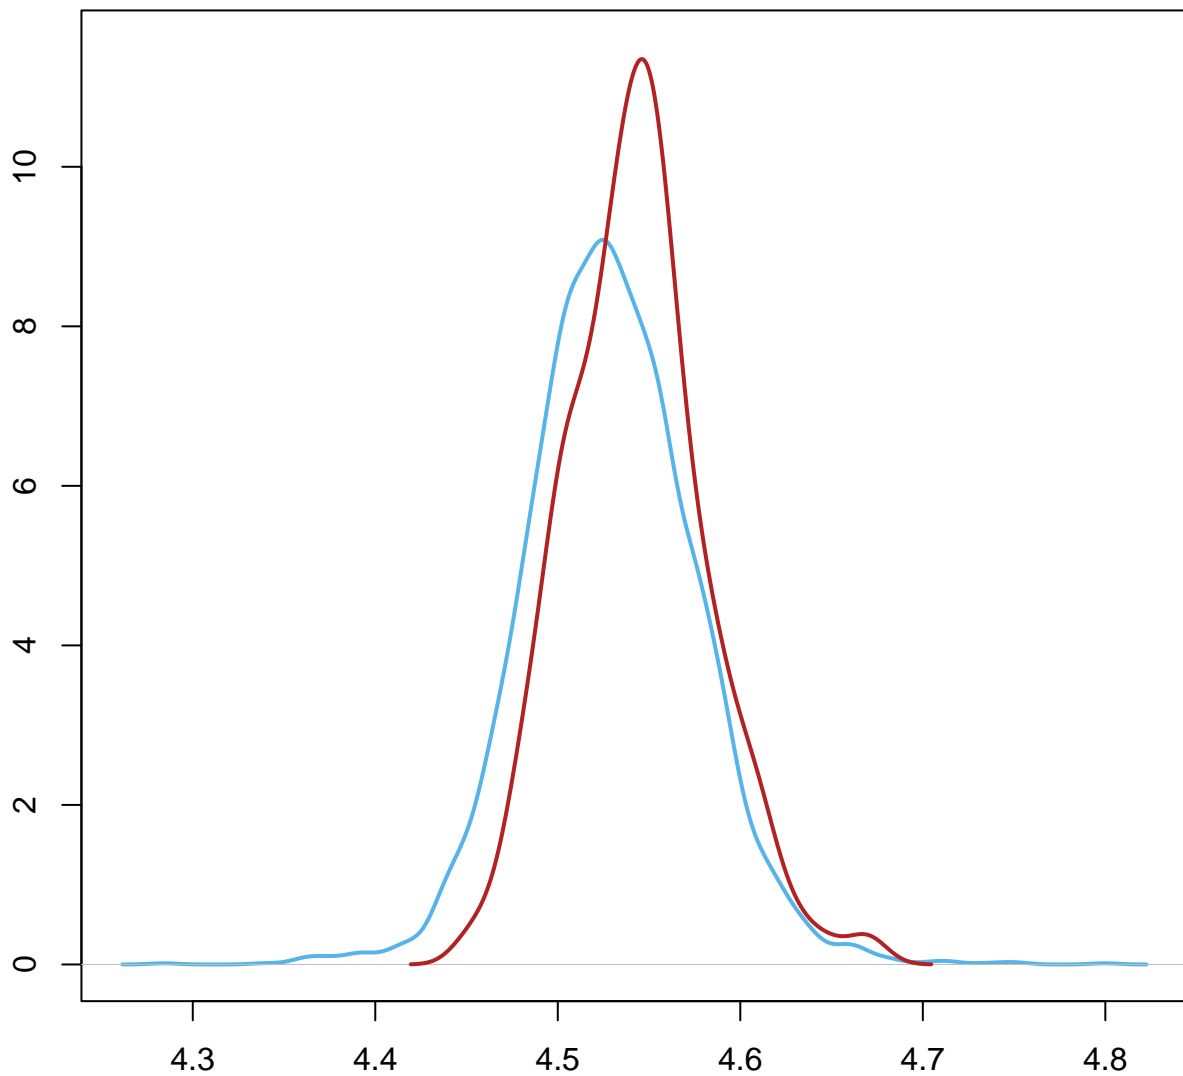

In\_Fe

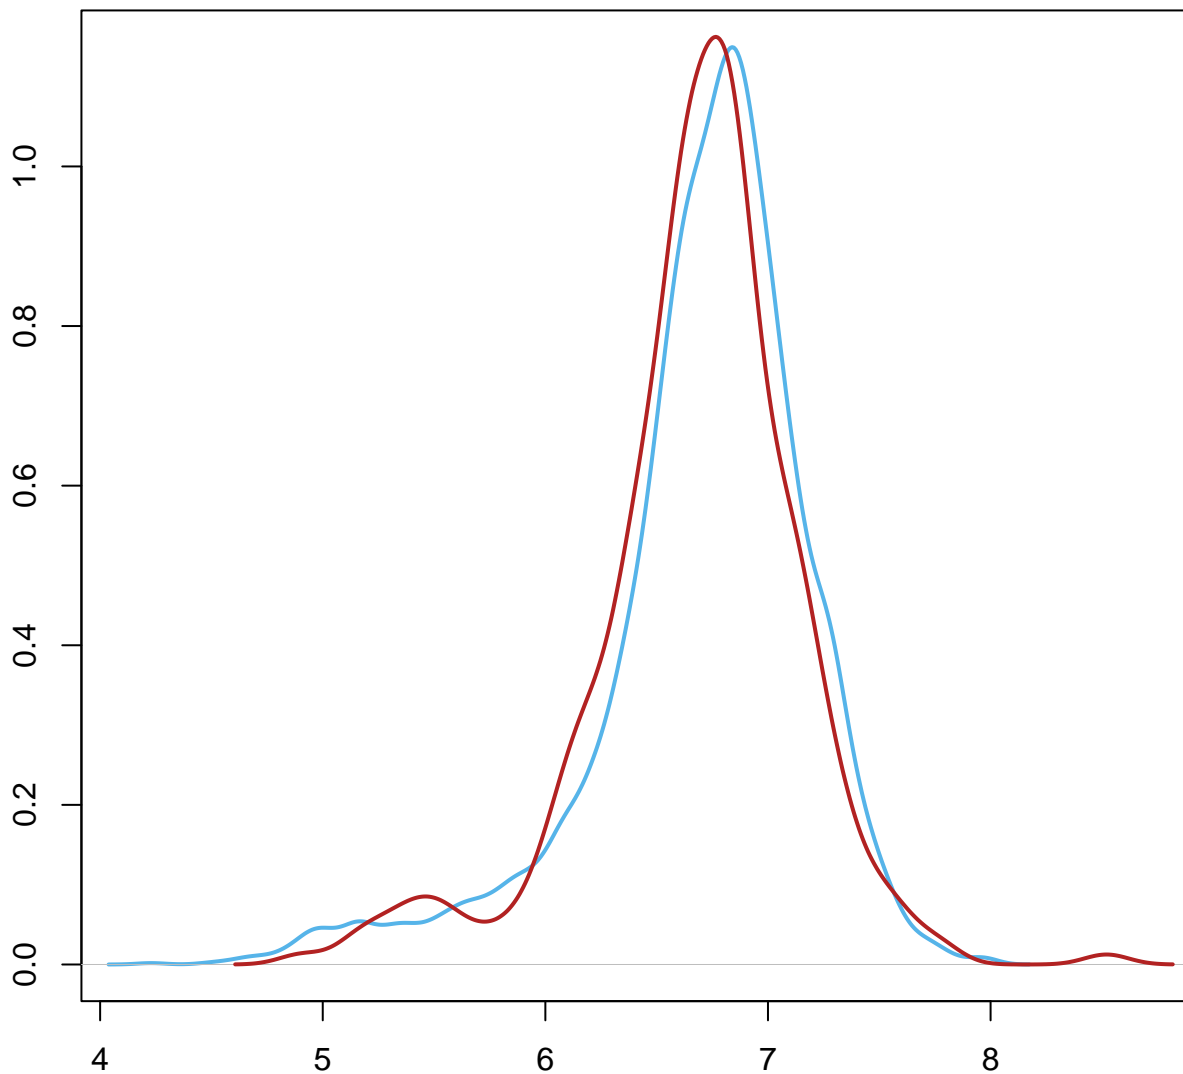

In\_Co

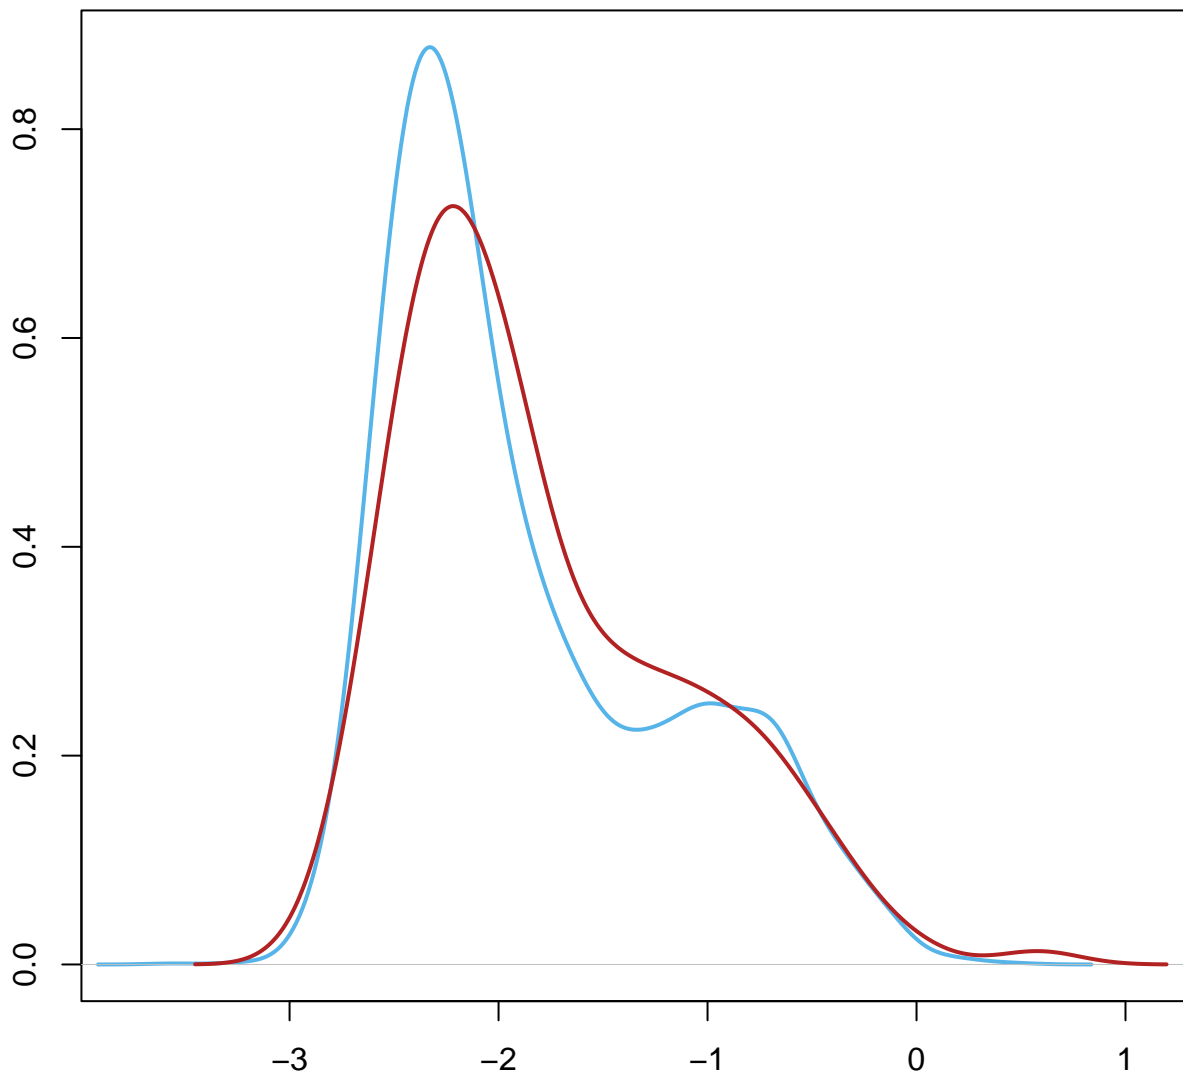



In\_Cu

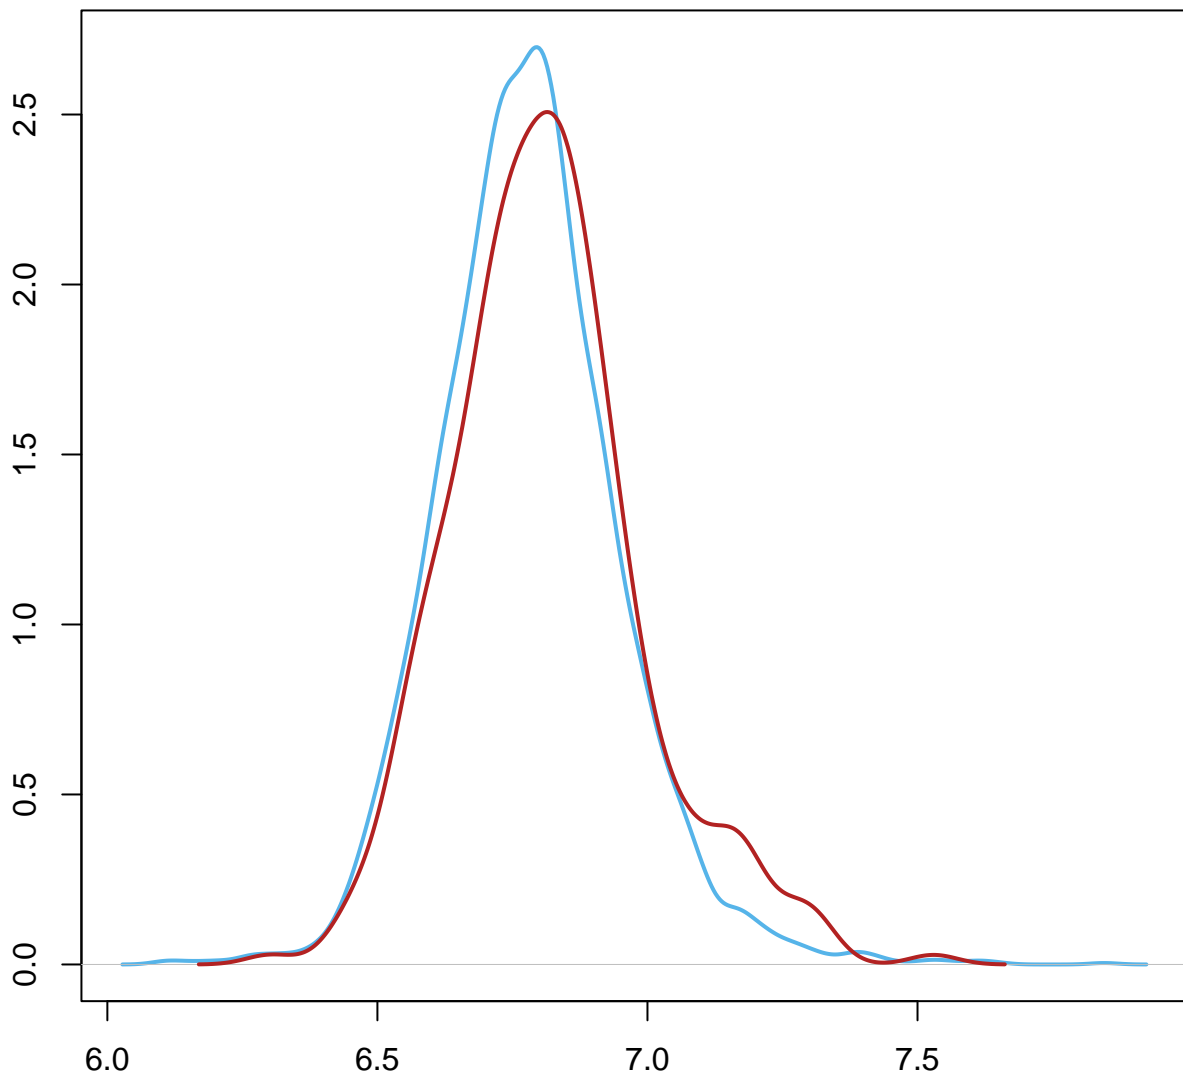

ln\_Zn

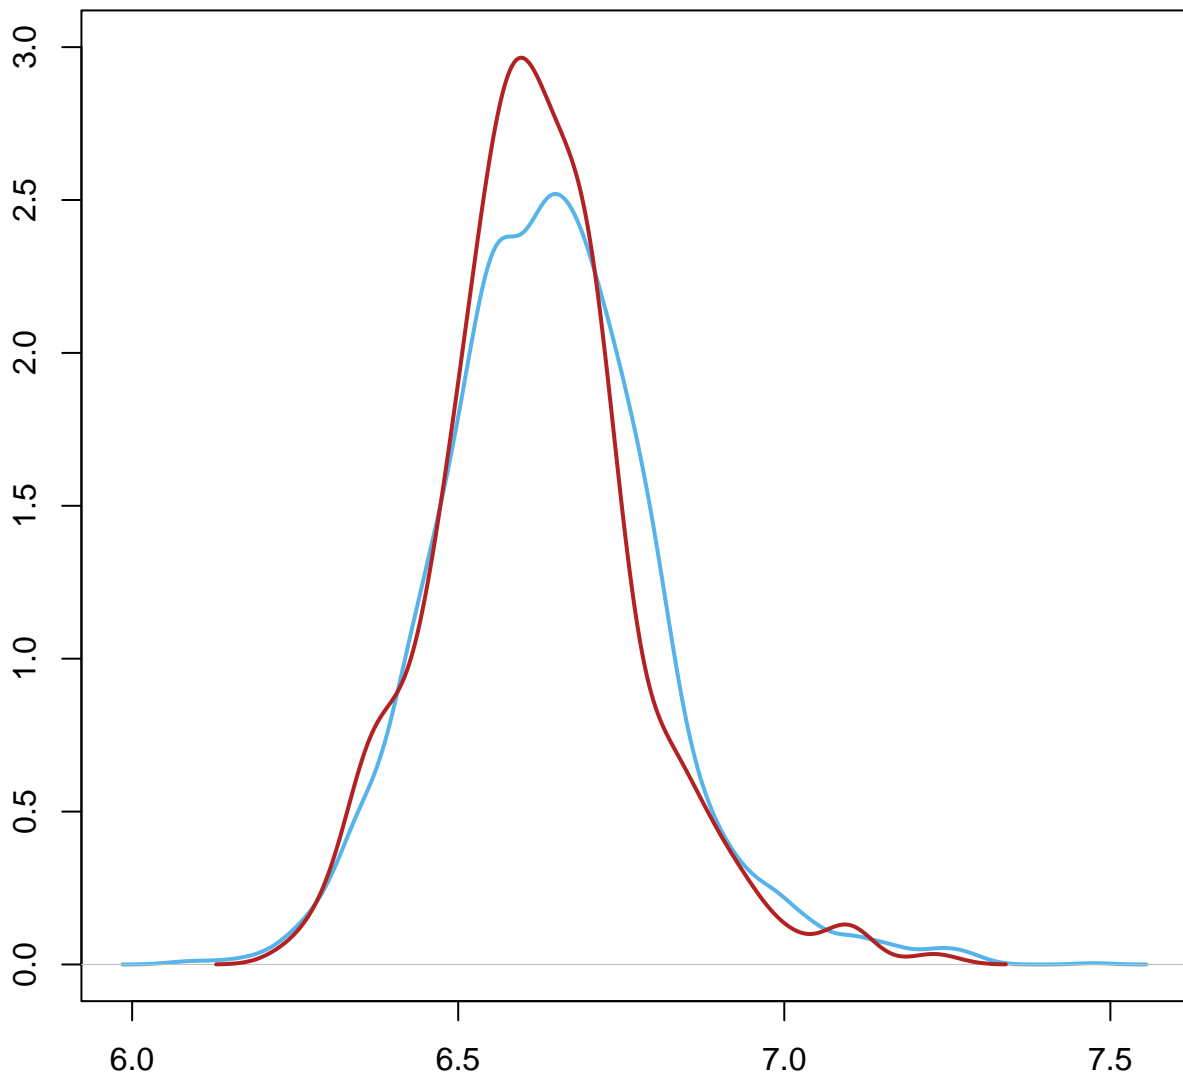

**ln\_As**

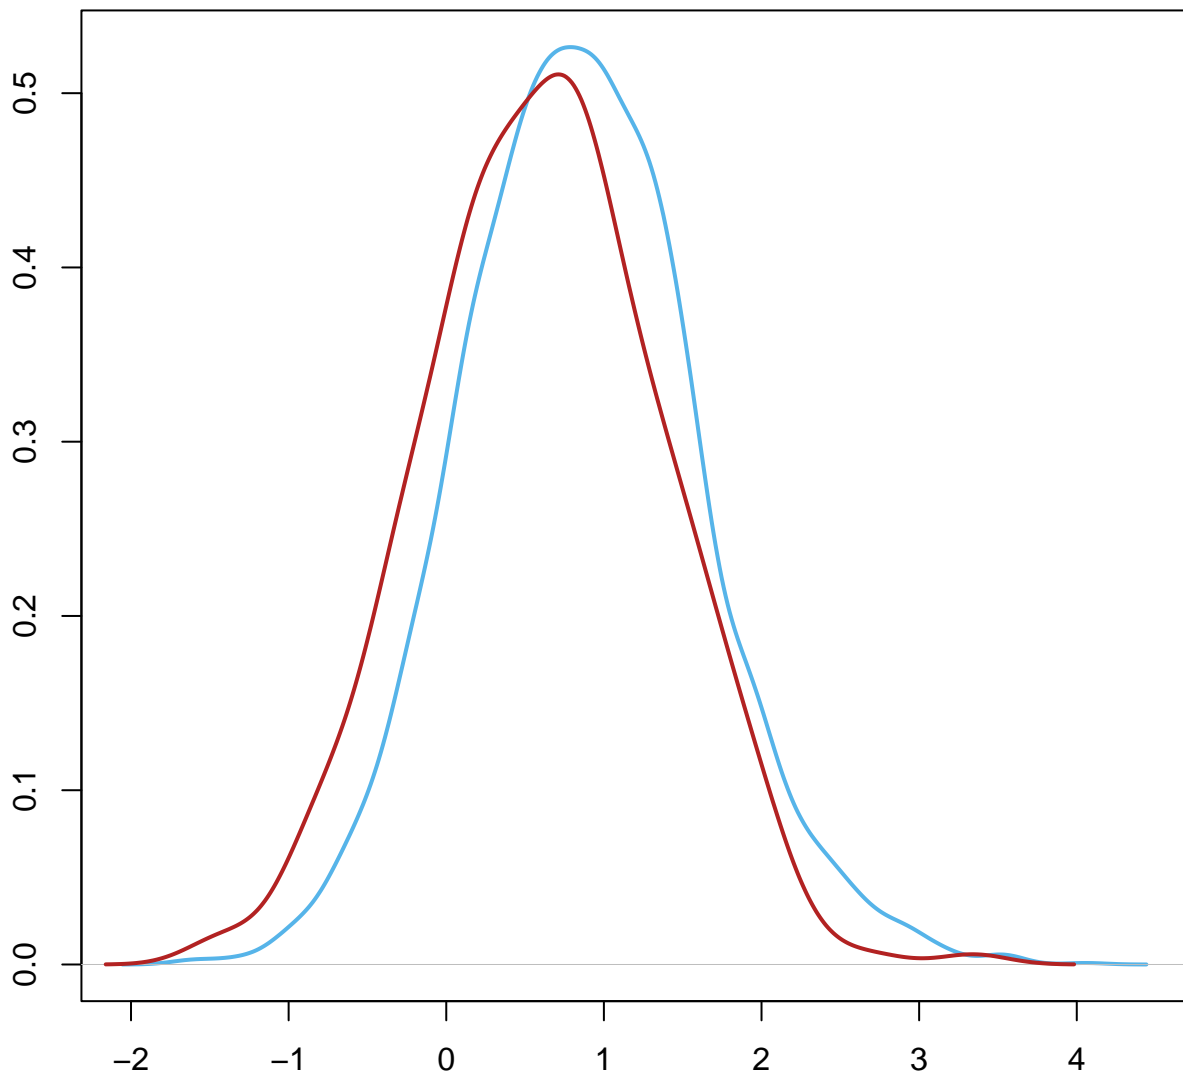

In\_Se

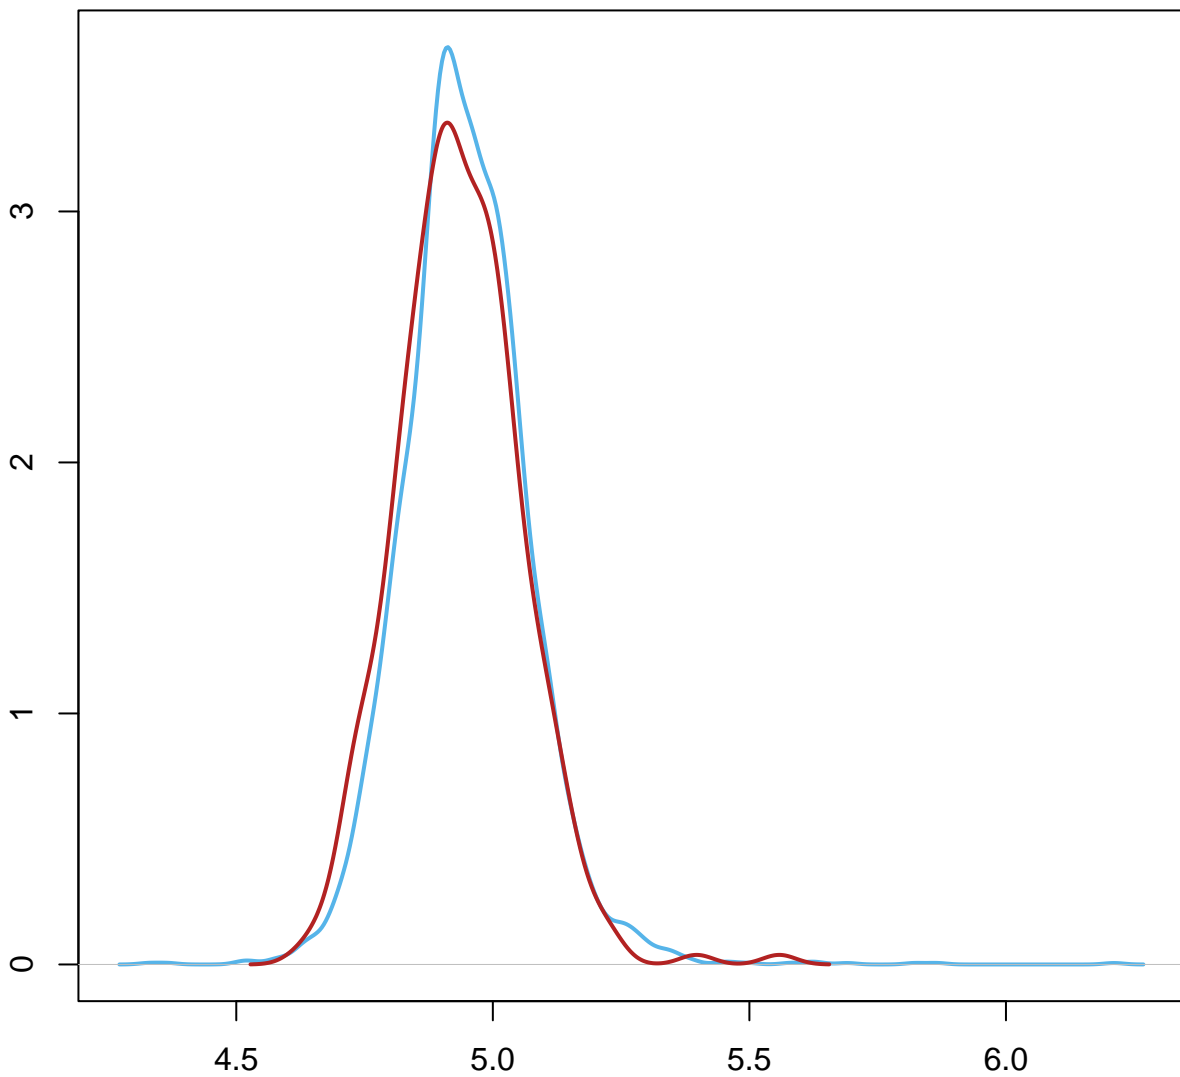

In\_Rb

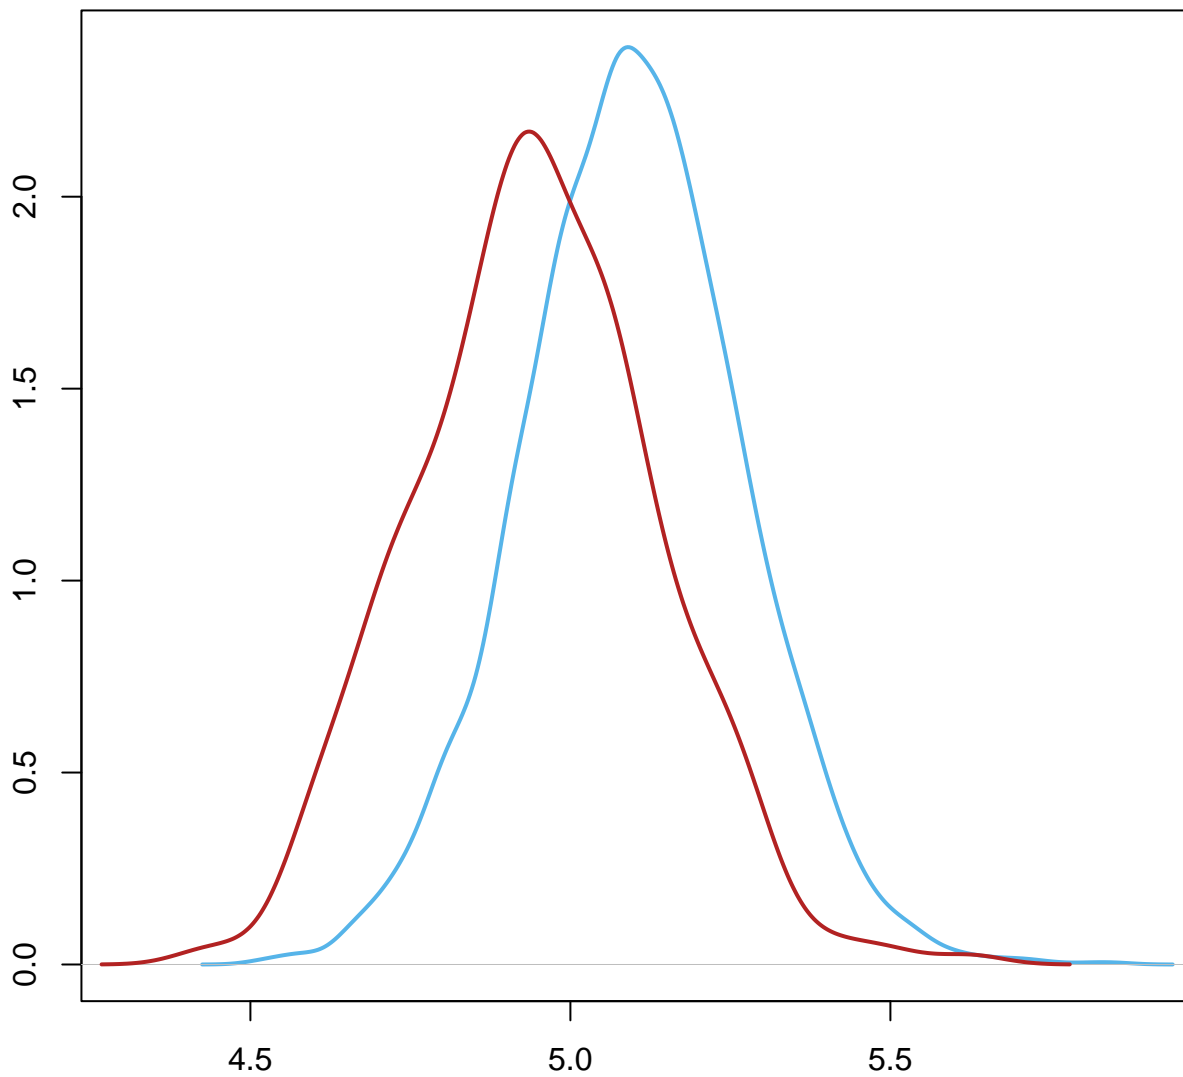

In\_Sr

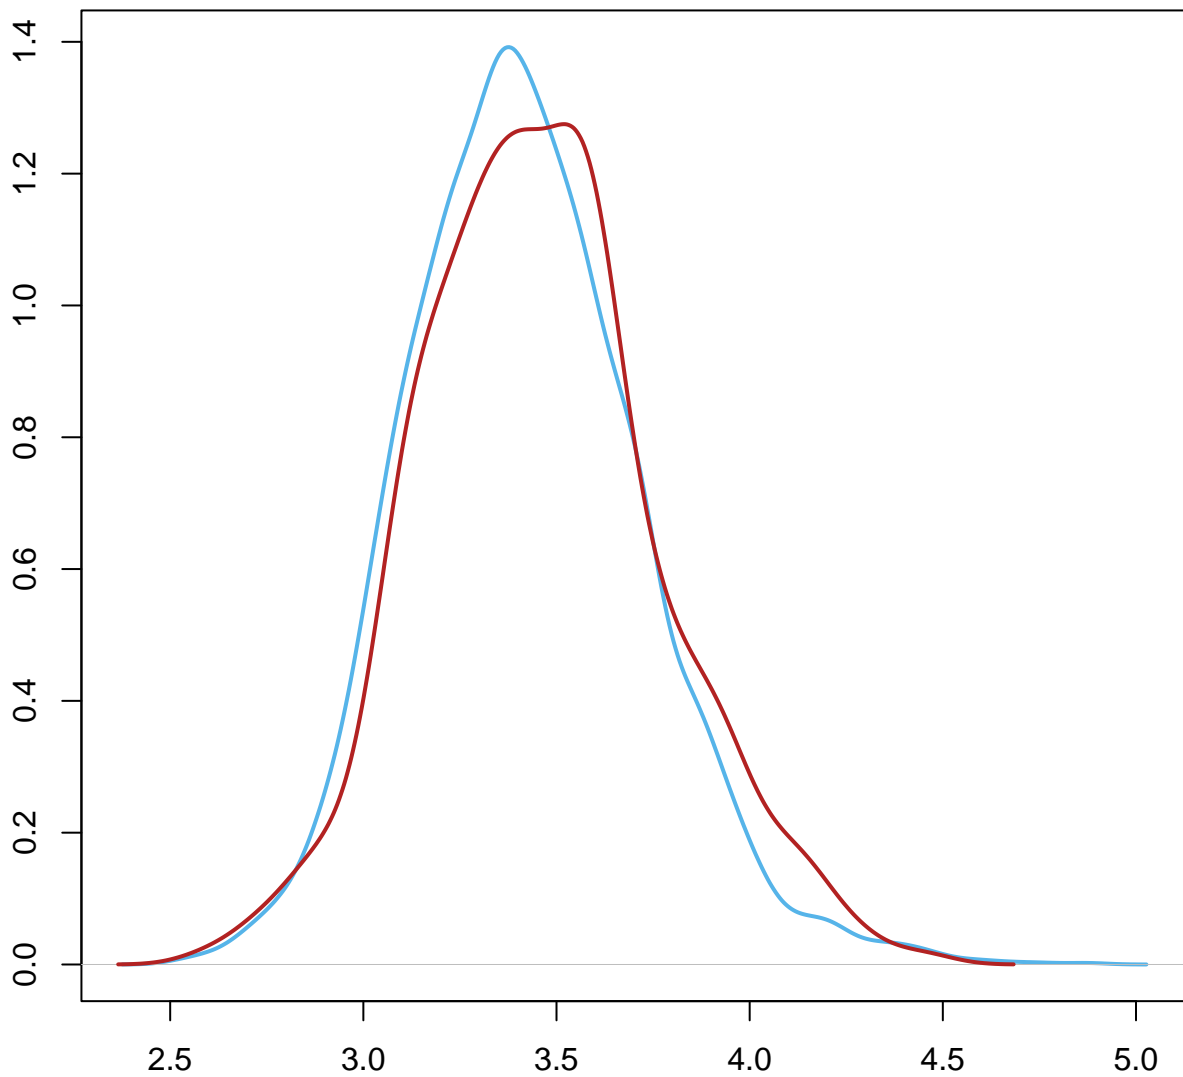

In\_Mo

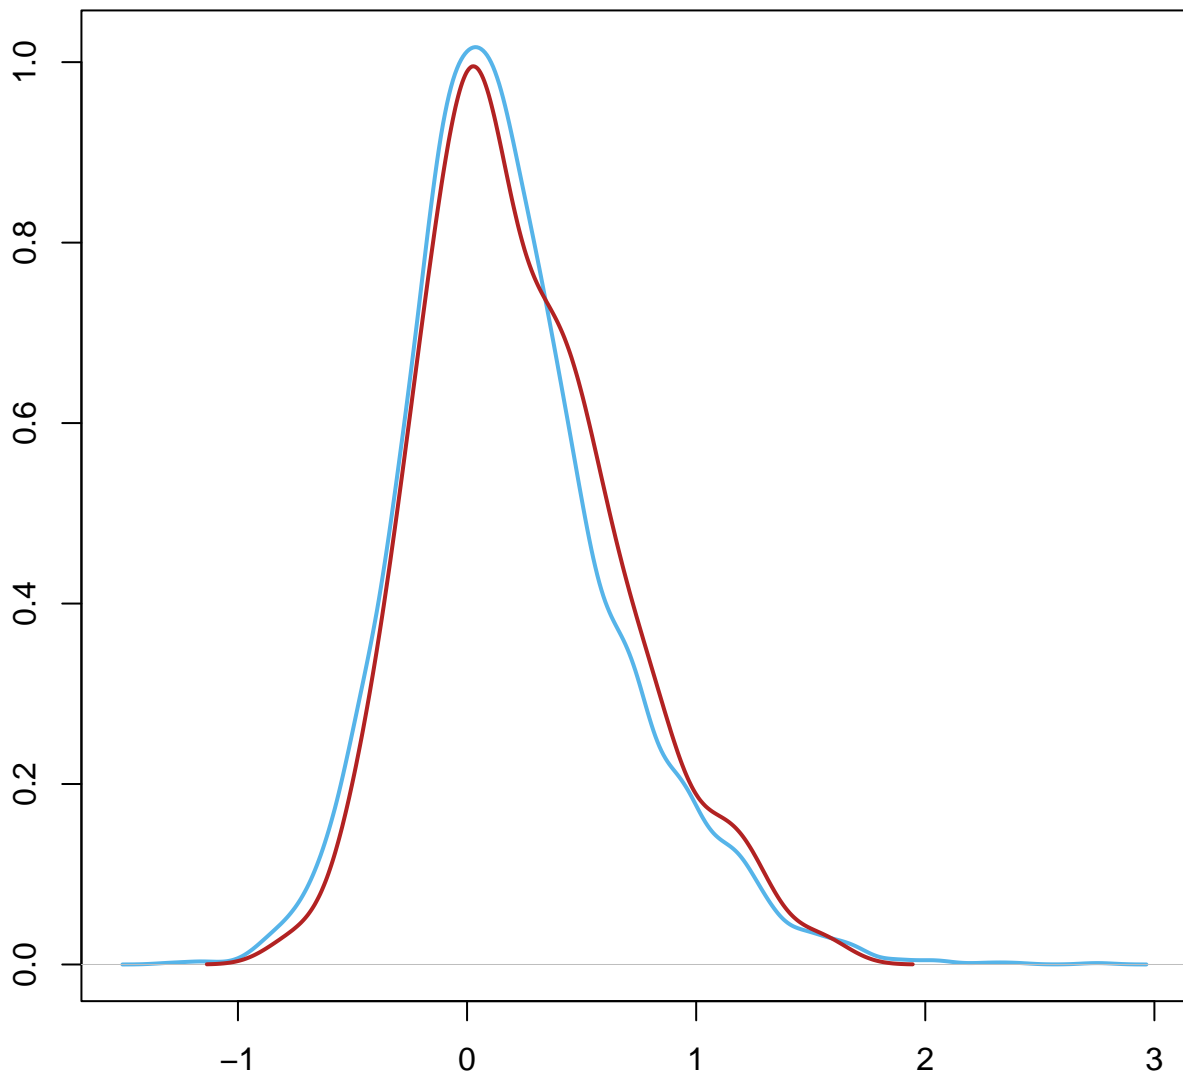

In\_Ag

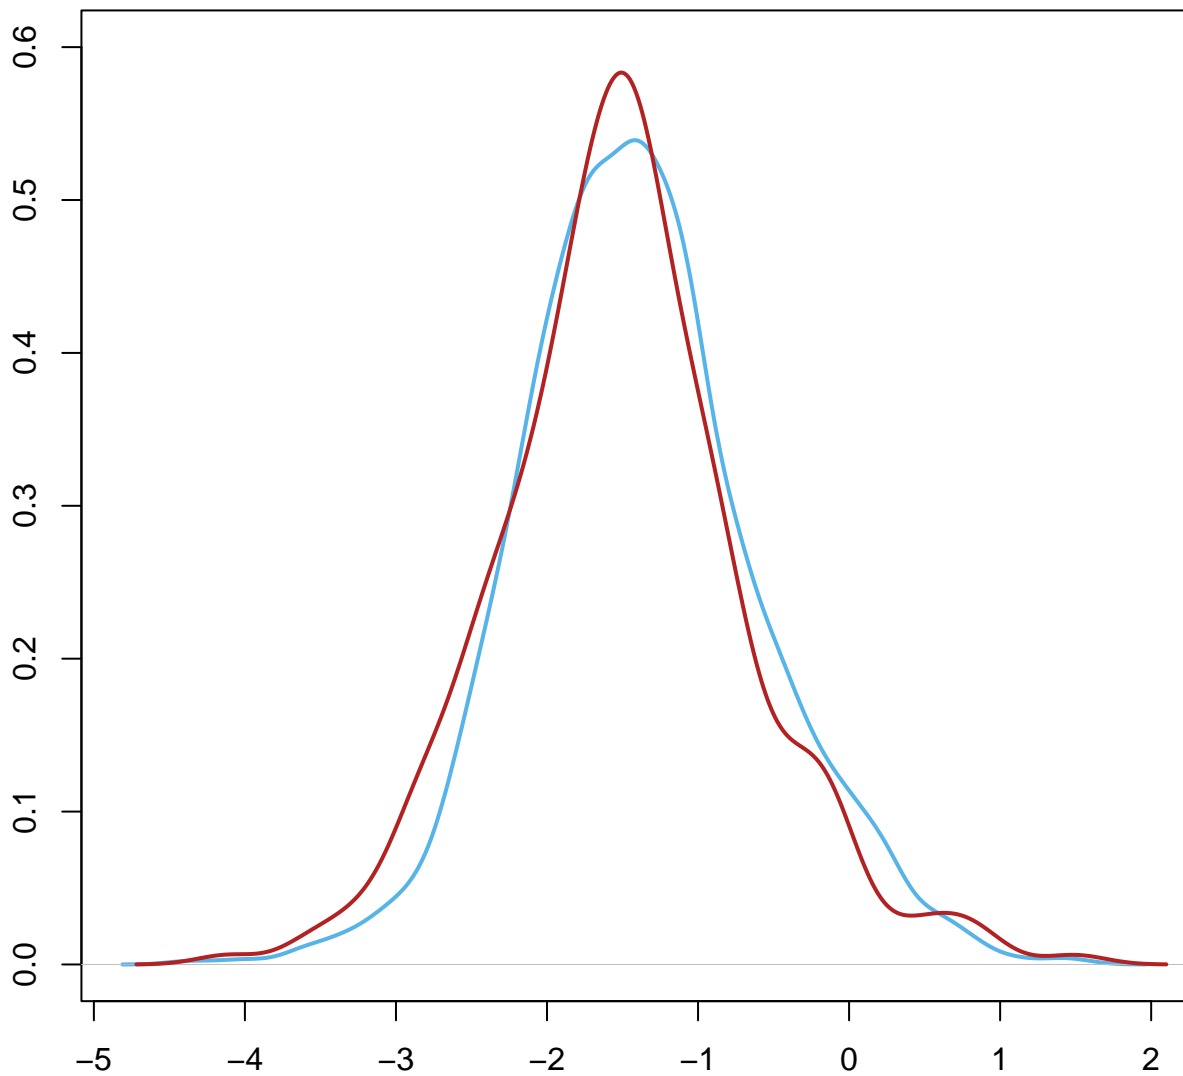



ln\_Cs

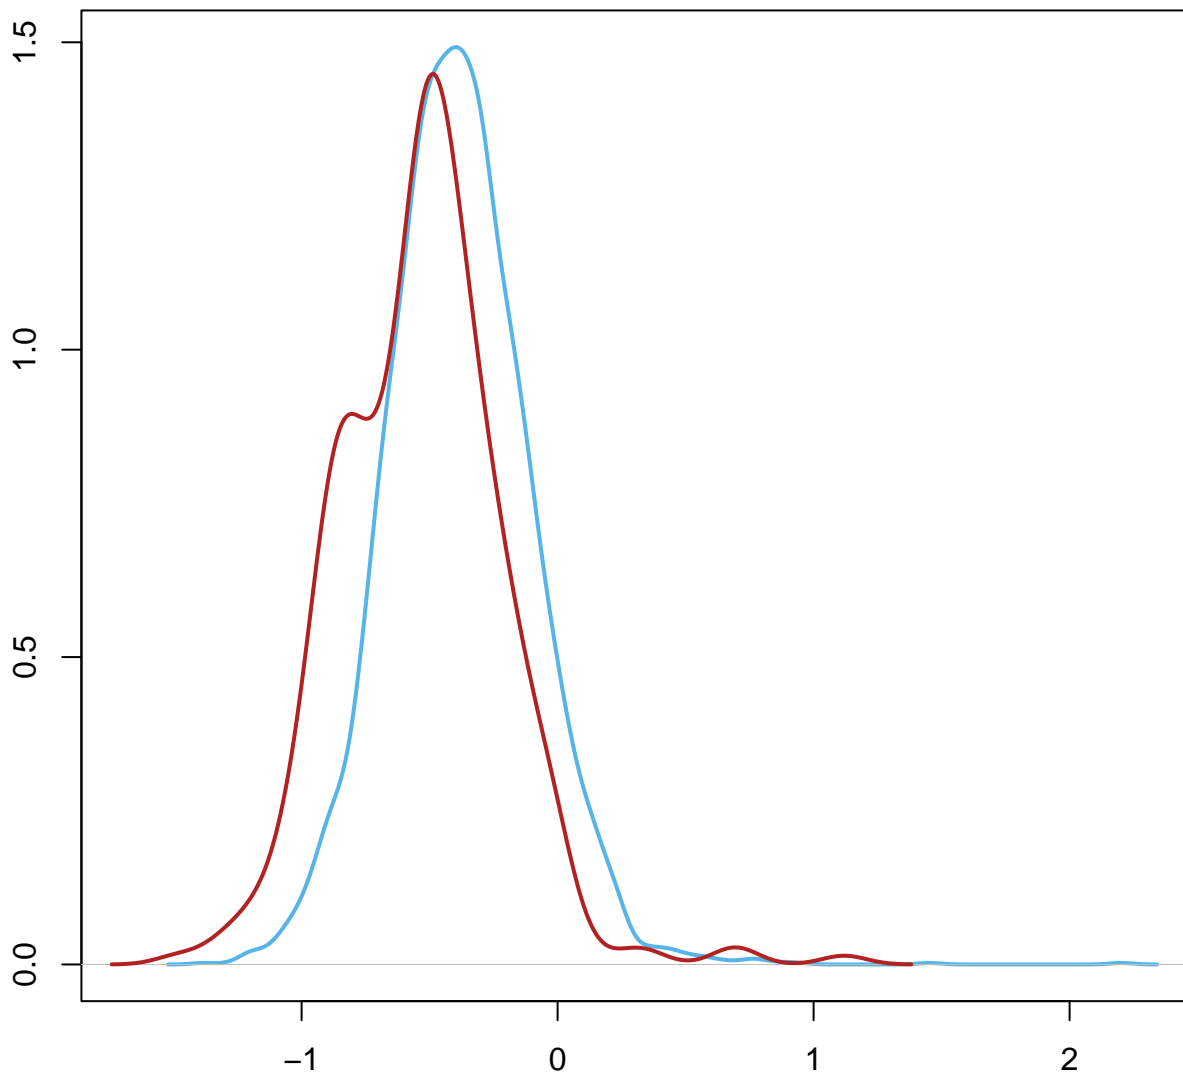

Supplement: Supporting_Figure_1.zip [file Supporting_Figure_1.zip]

In\_Na

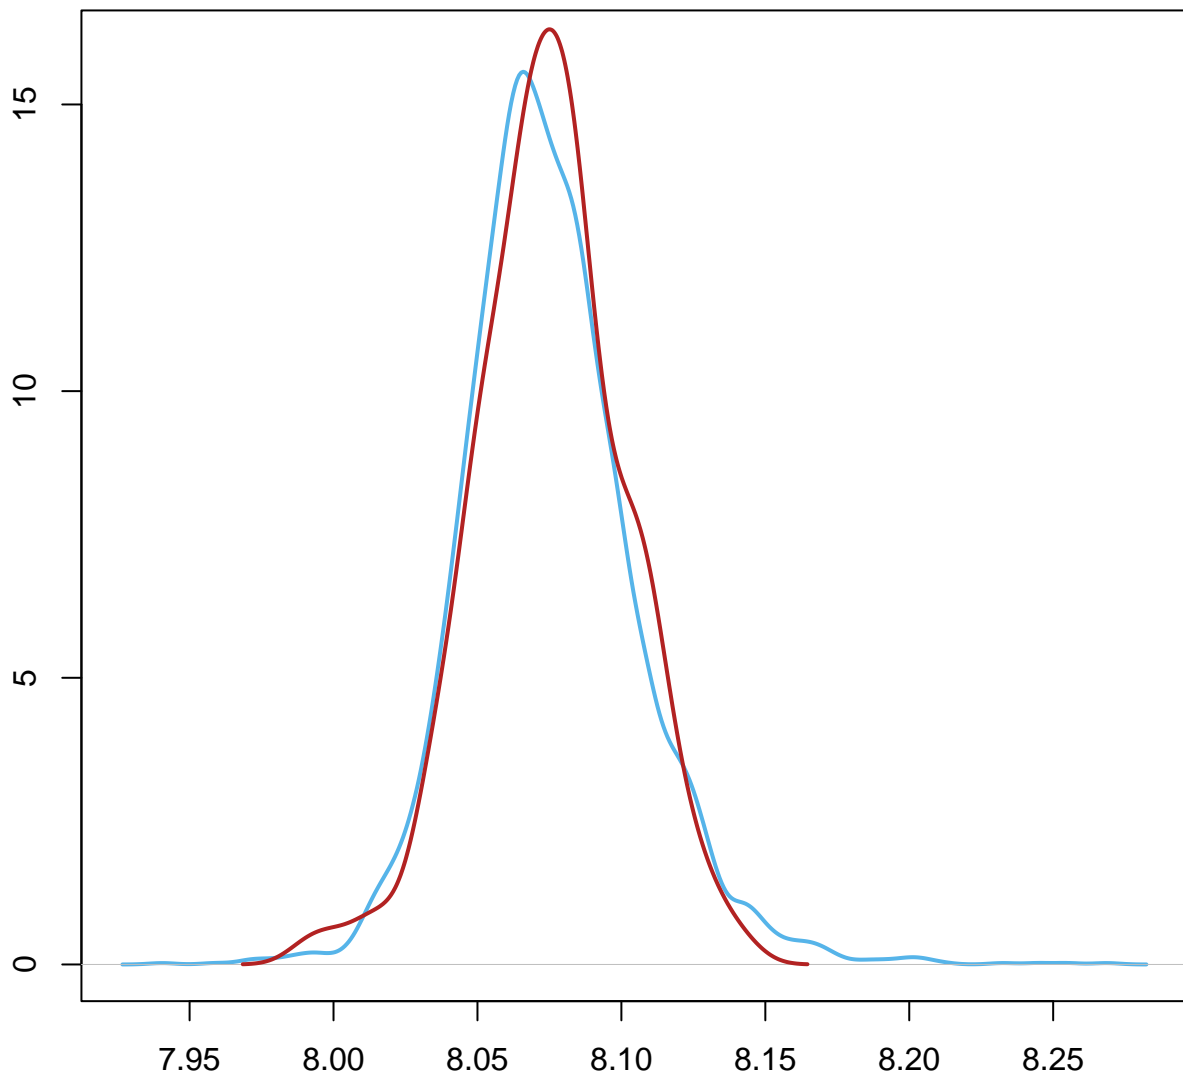

ln\_Mg

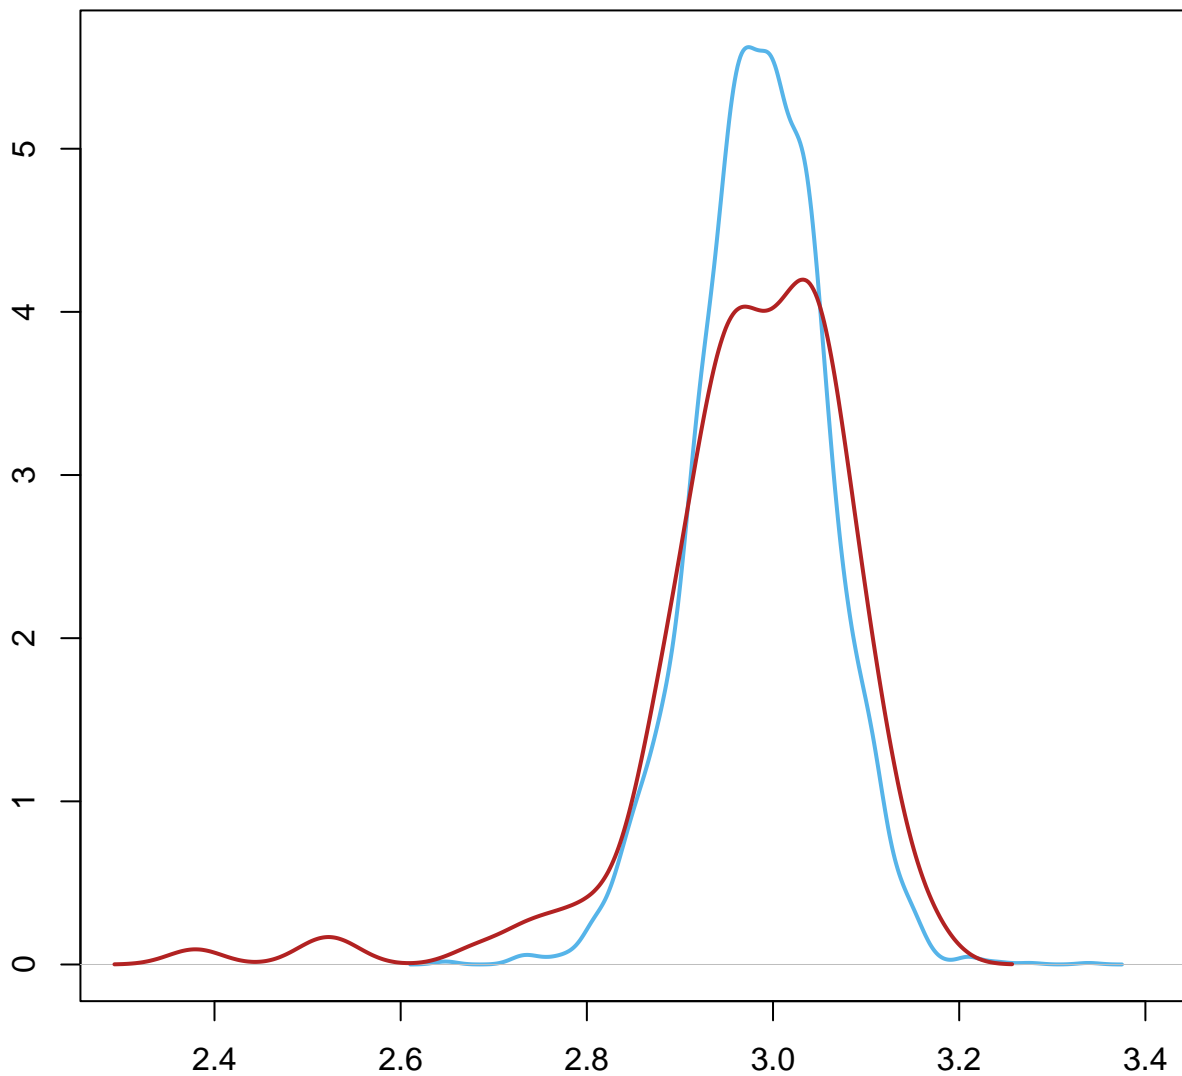

ln\_P

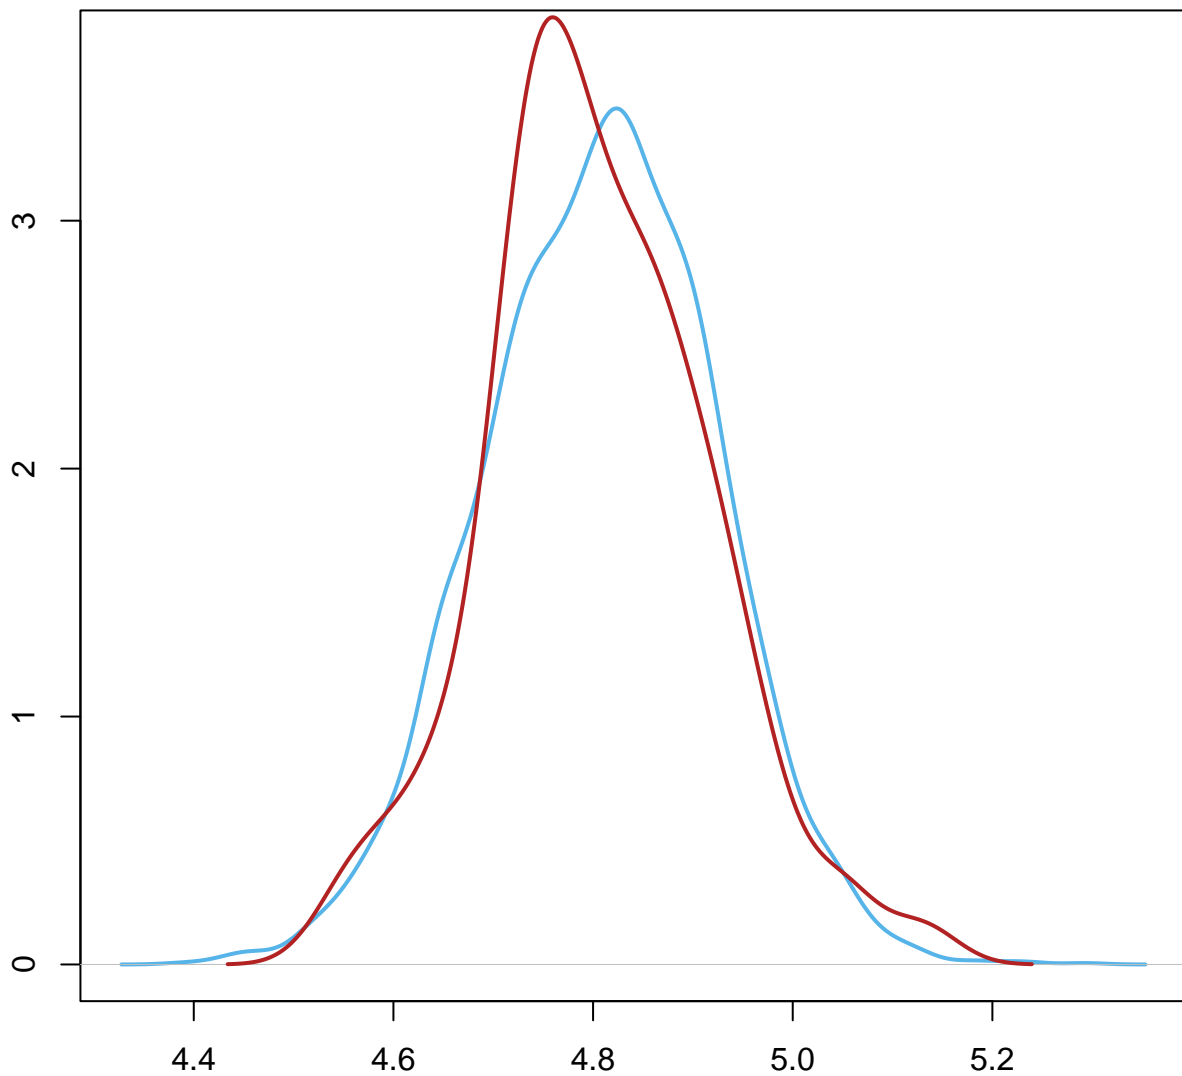

ln\_S

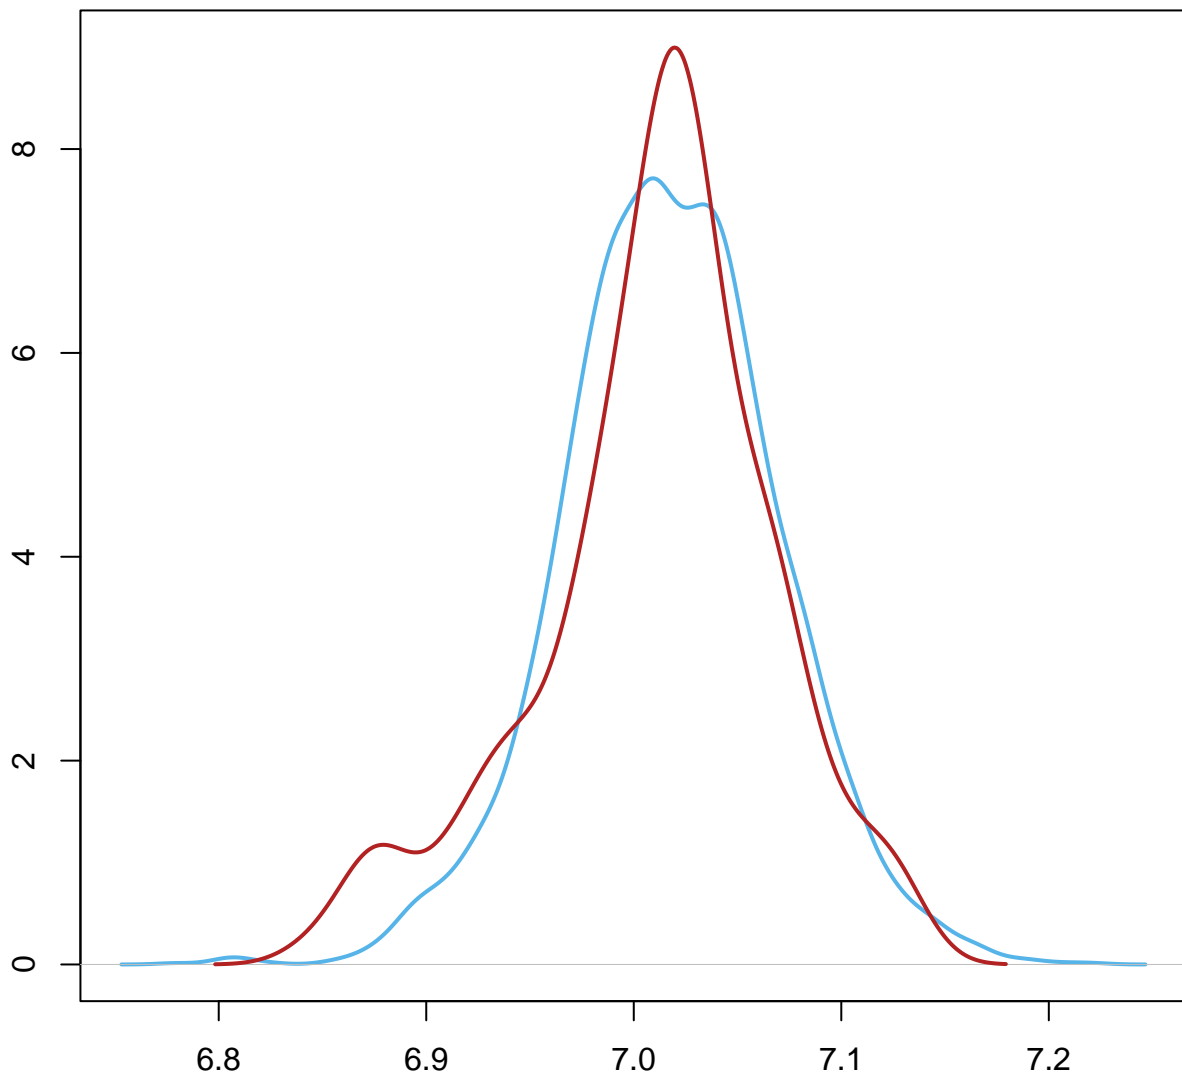

ln\_K

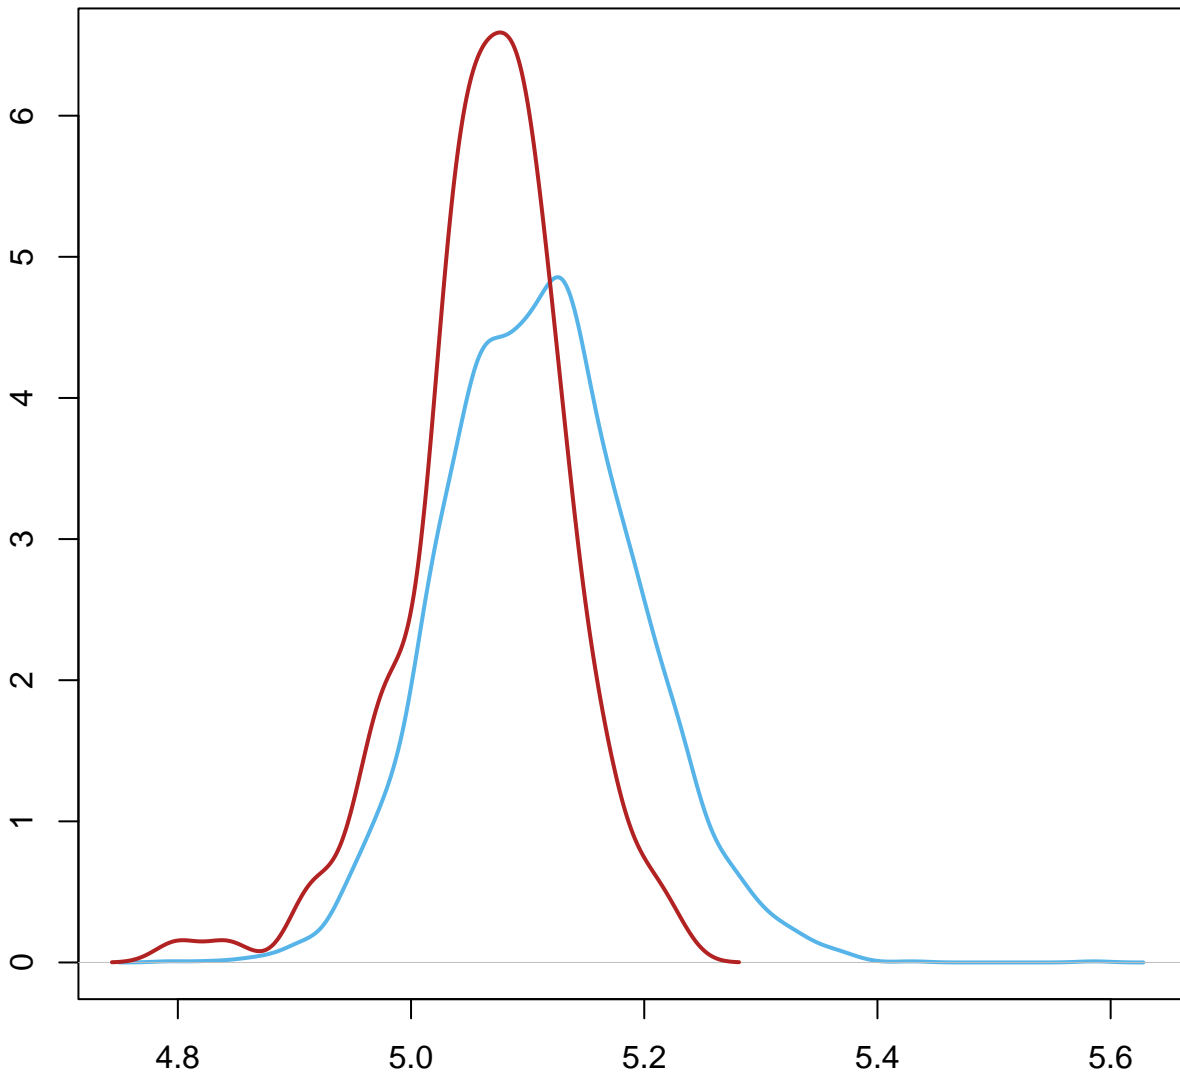

In\_Ca

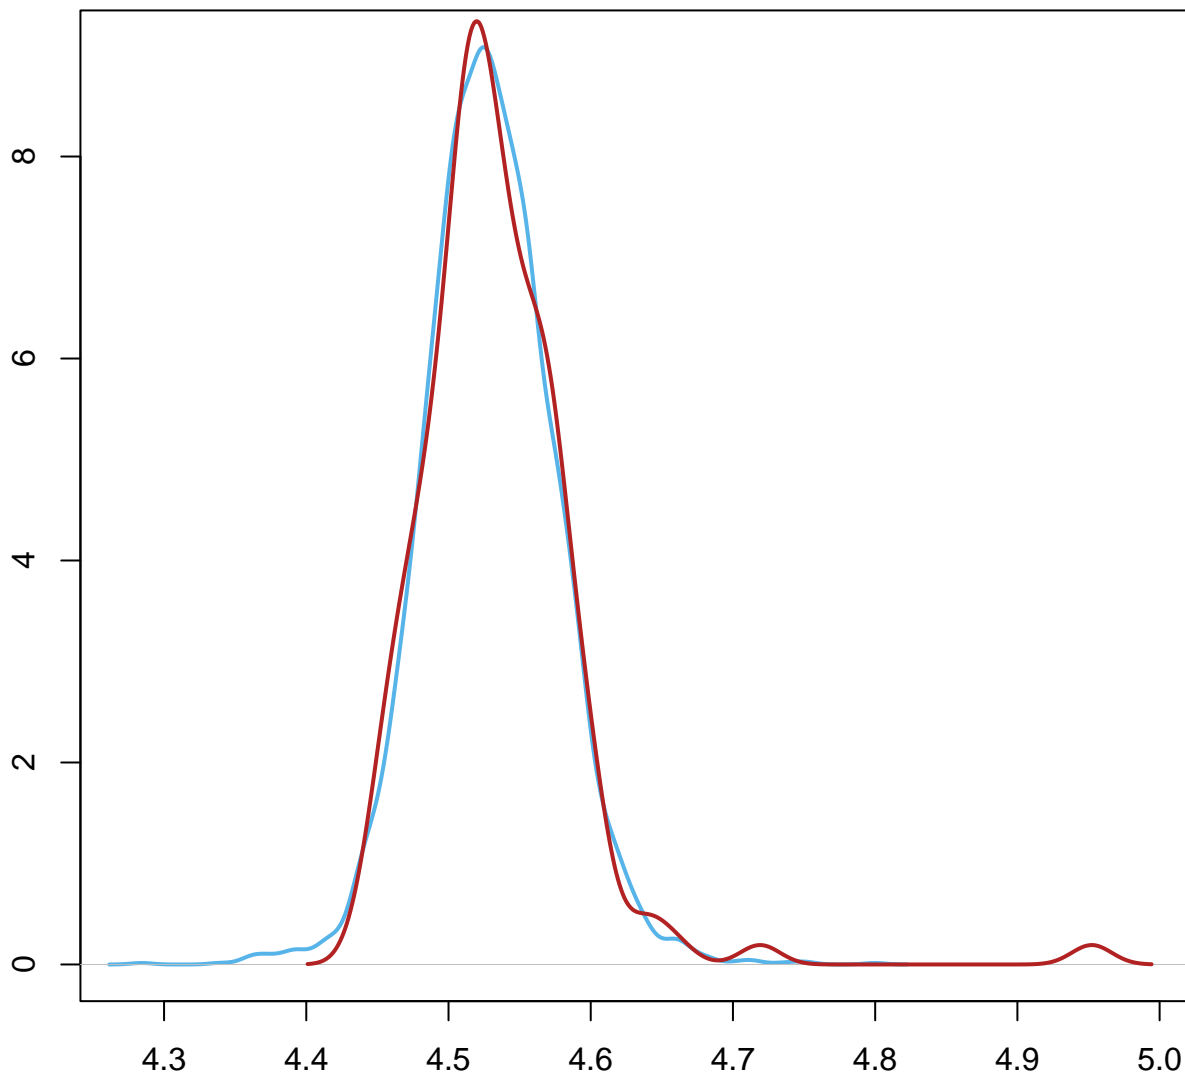

In\_Fe

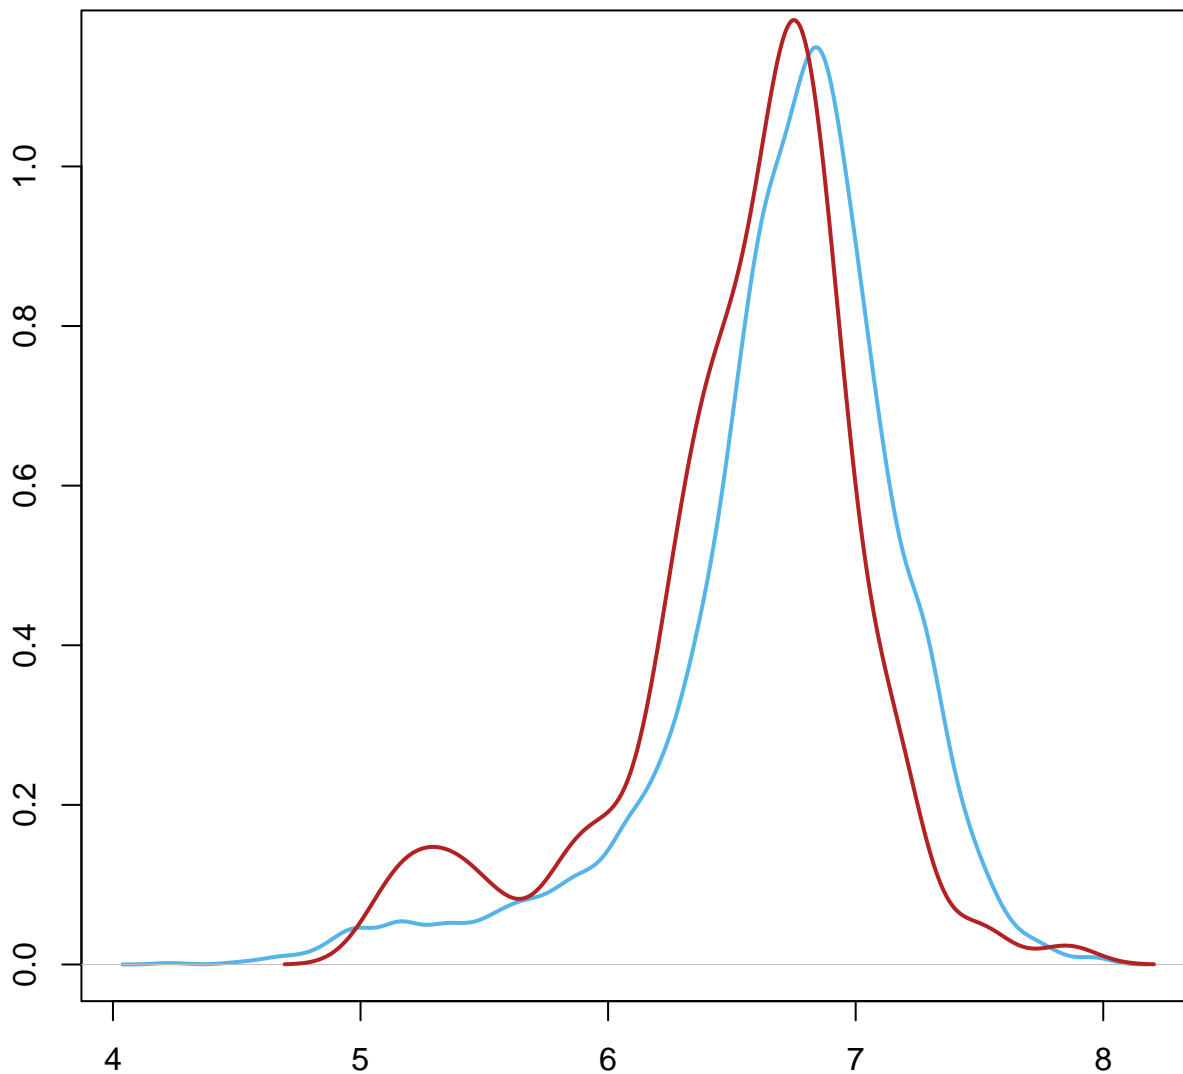

ln\_Co

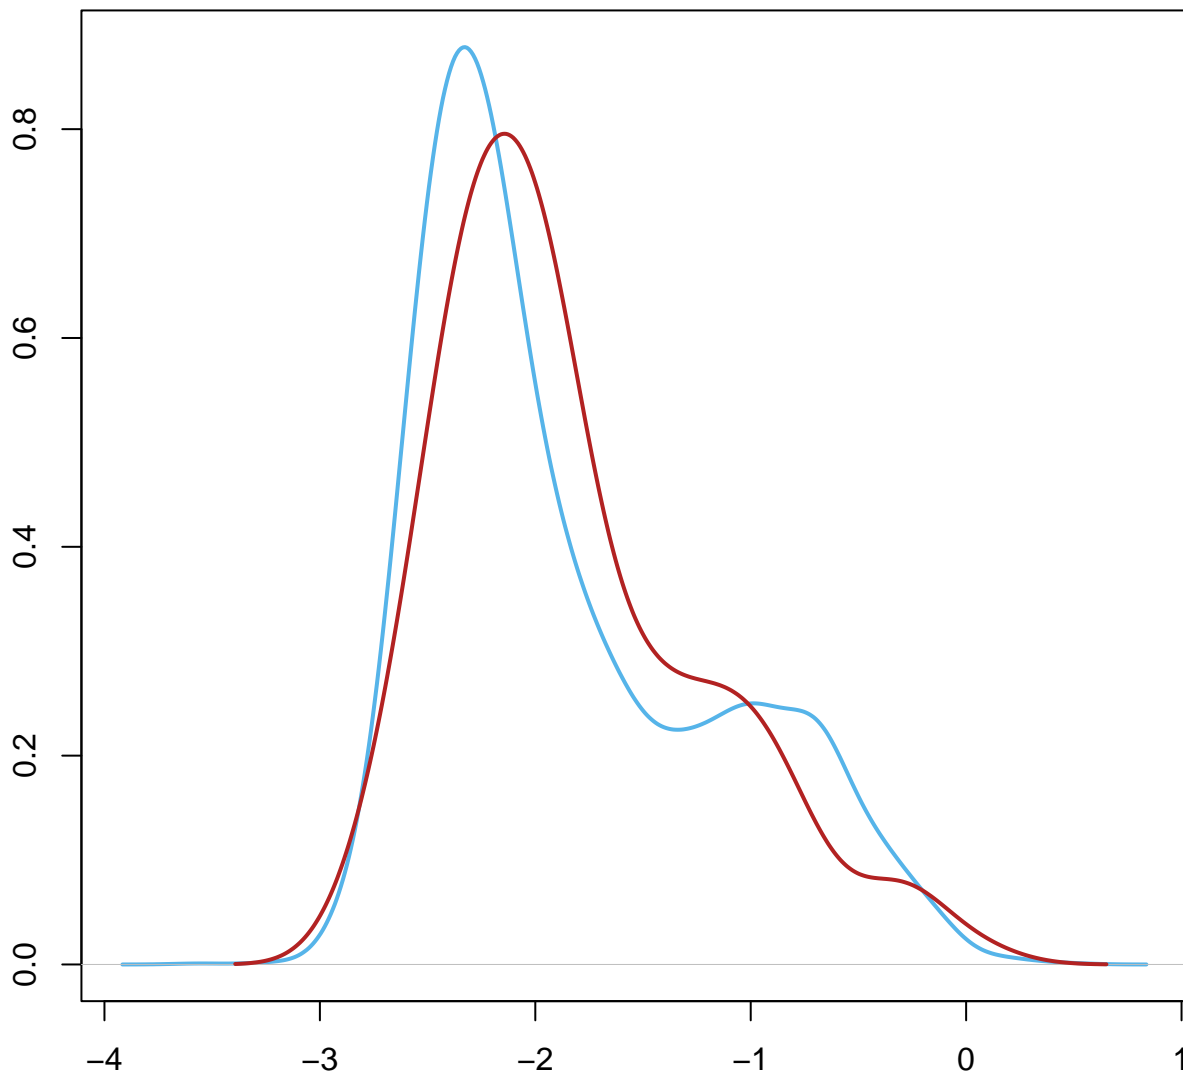



In\_Cu

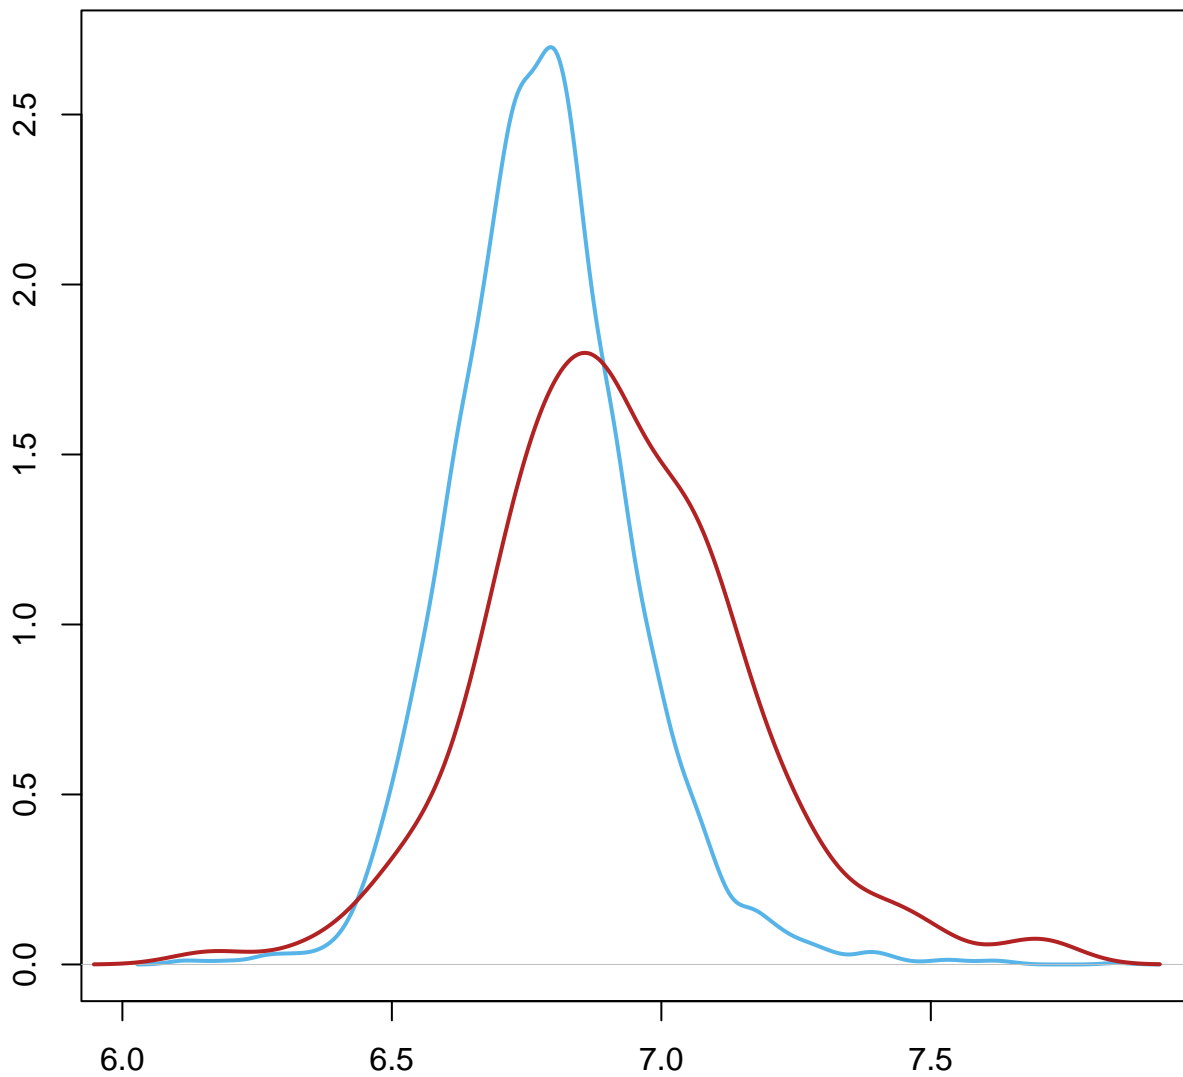

ln\_Zn

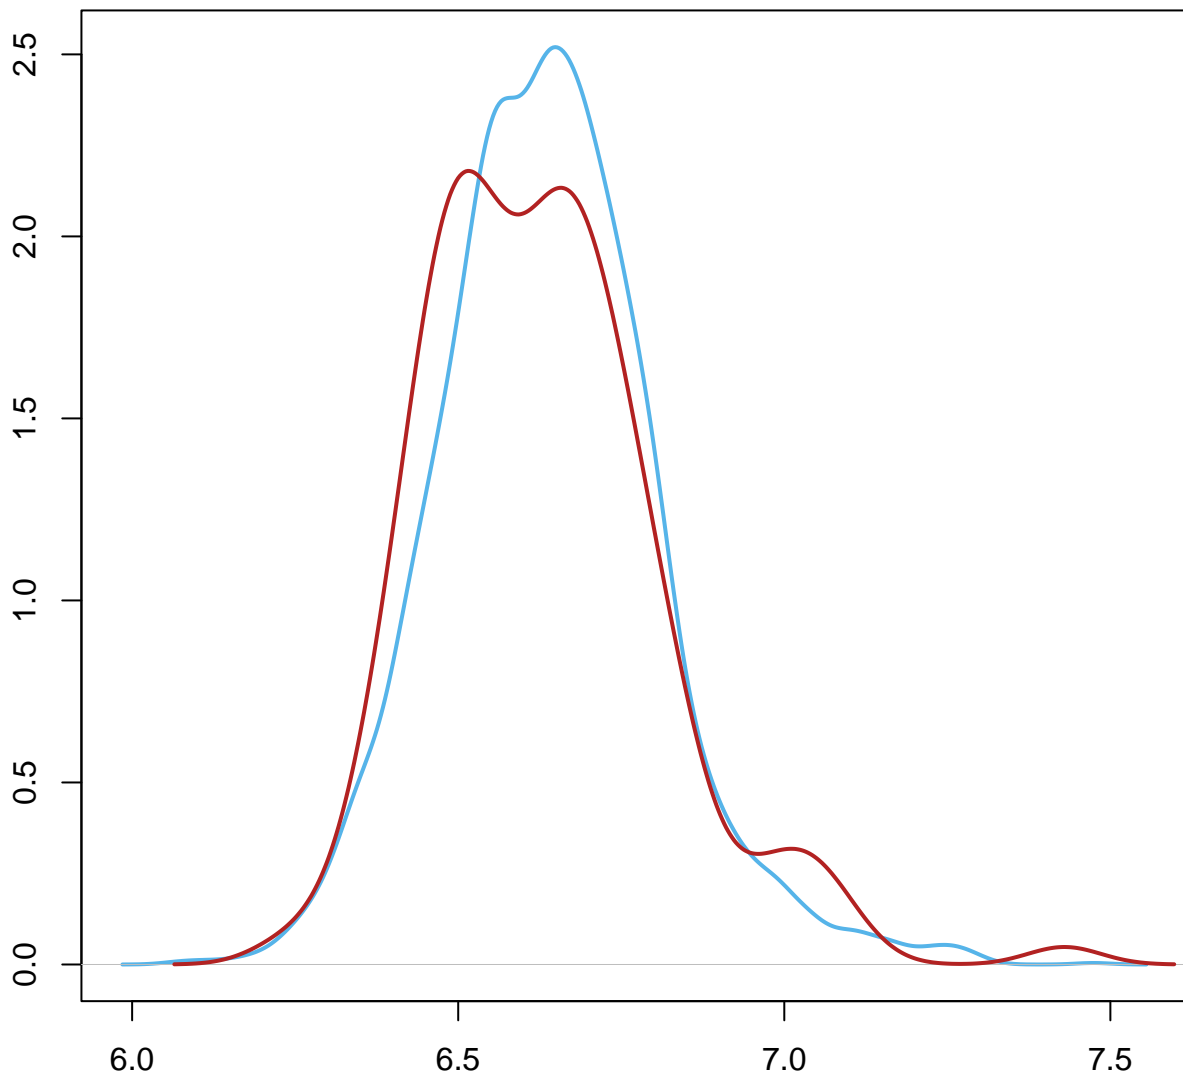

ln\_As

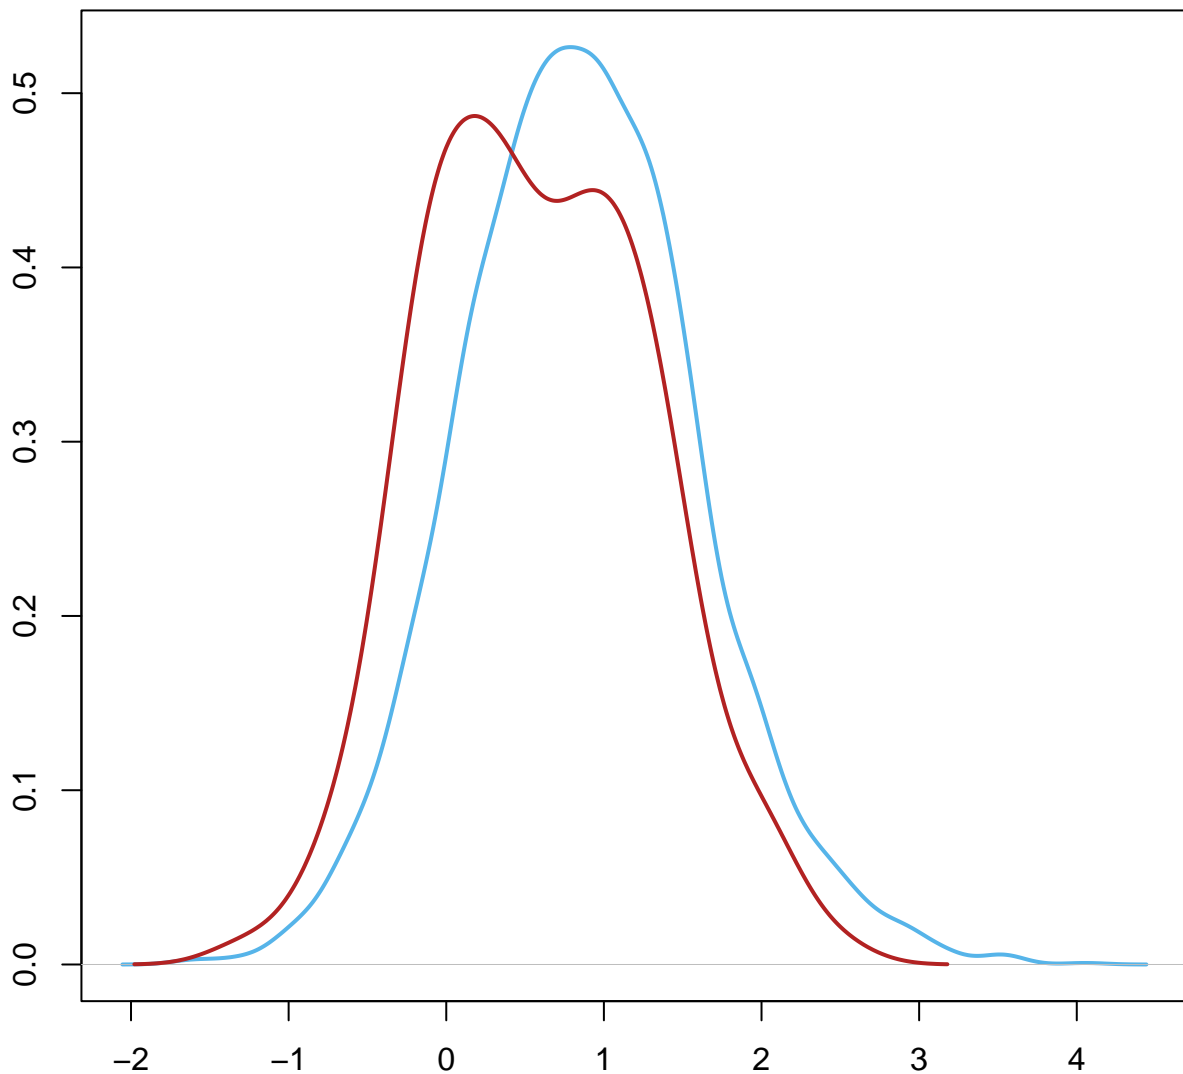

In\_Se

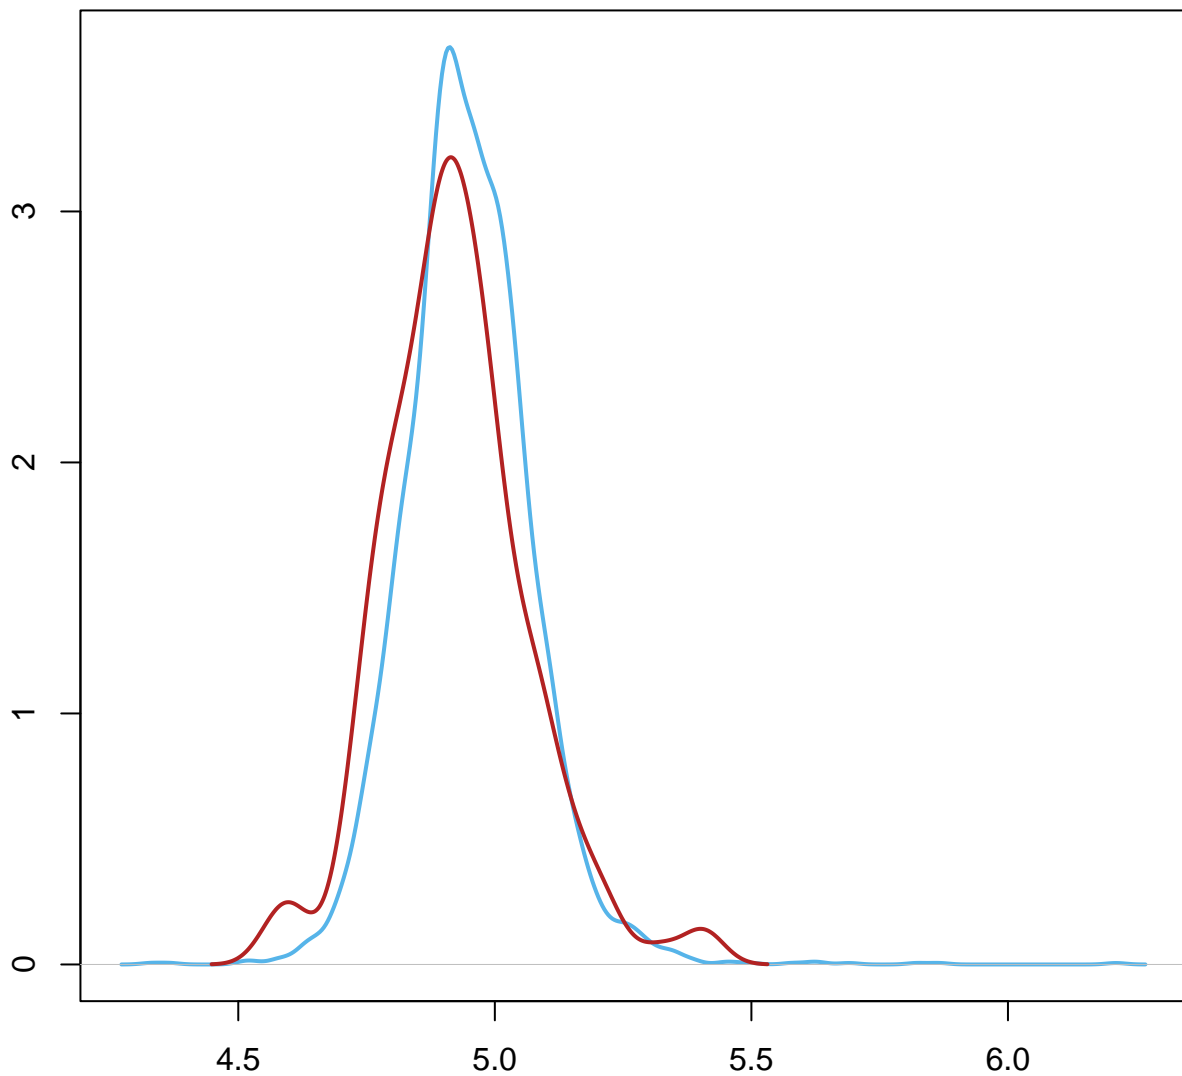

In\_Rb

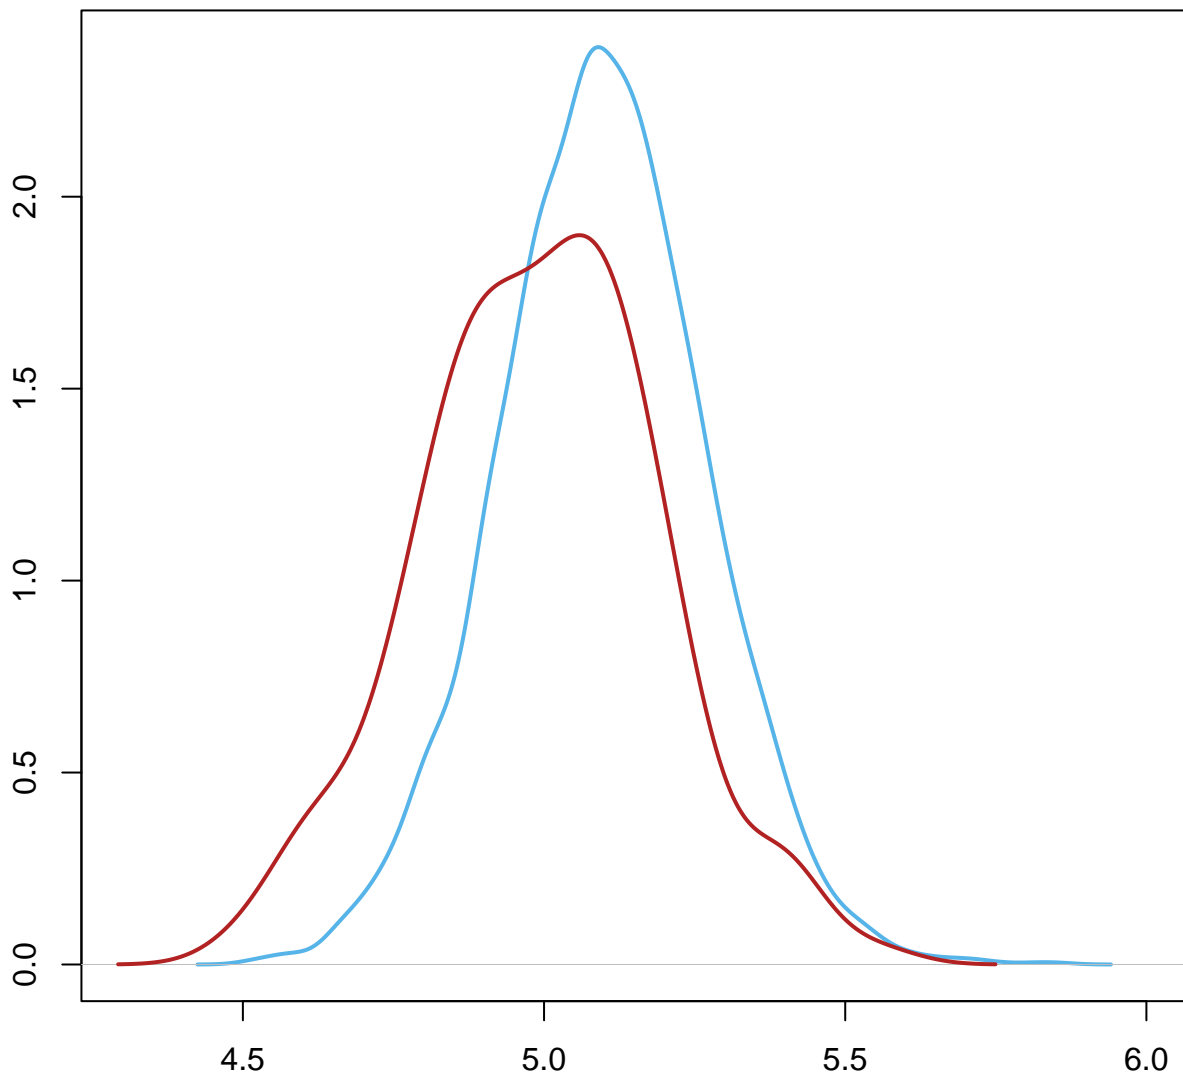

In\_Sr

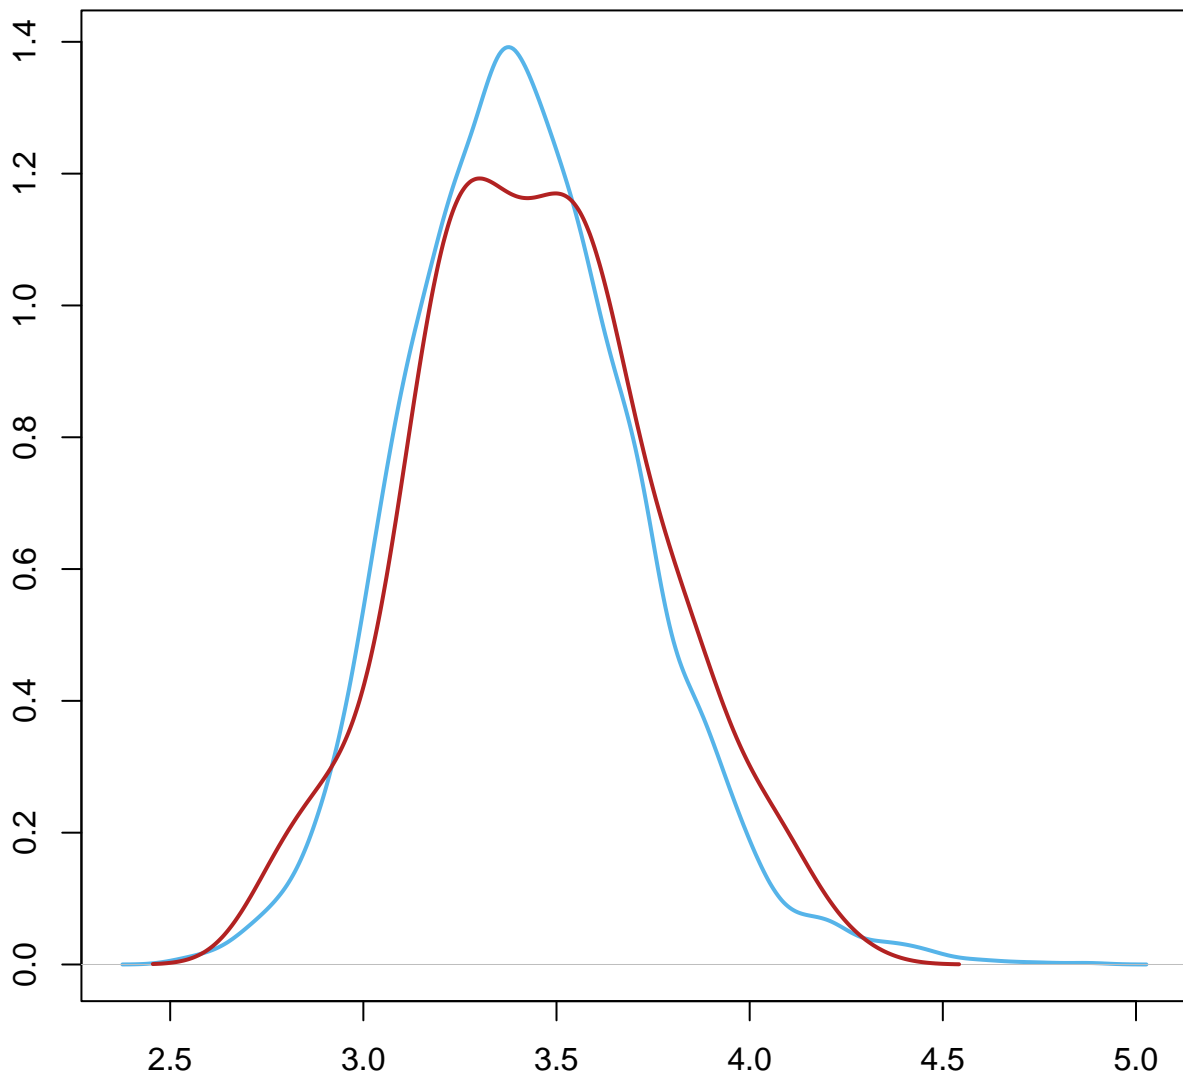

In\_Mo

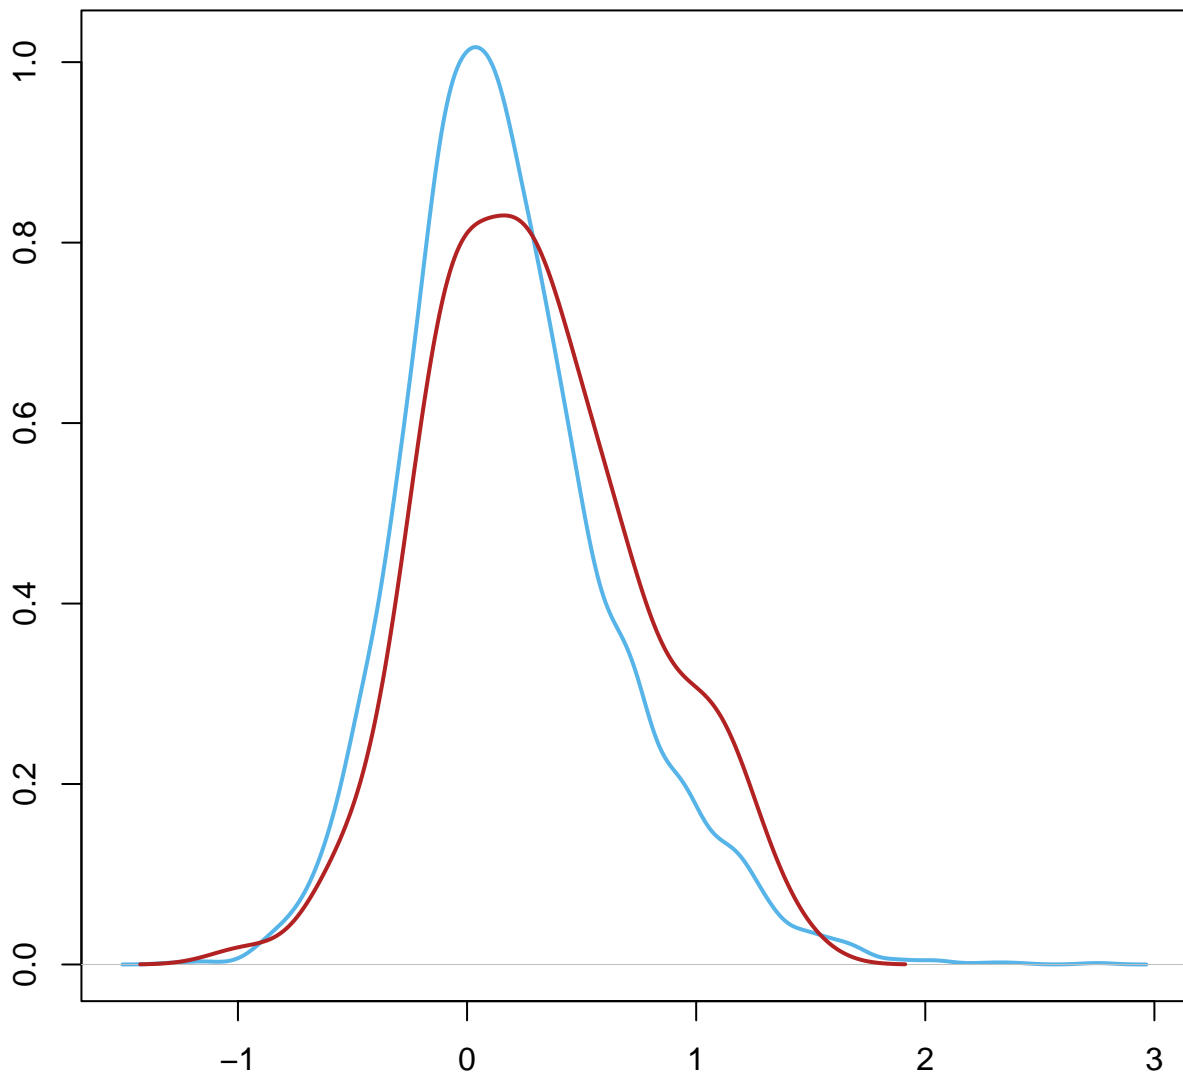

In\_Ag

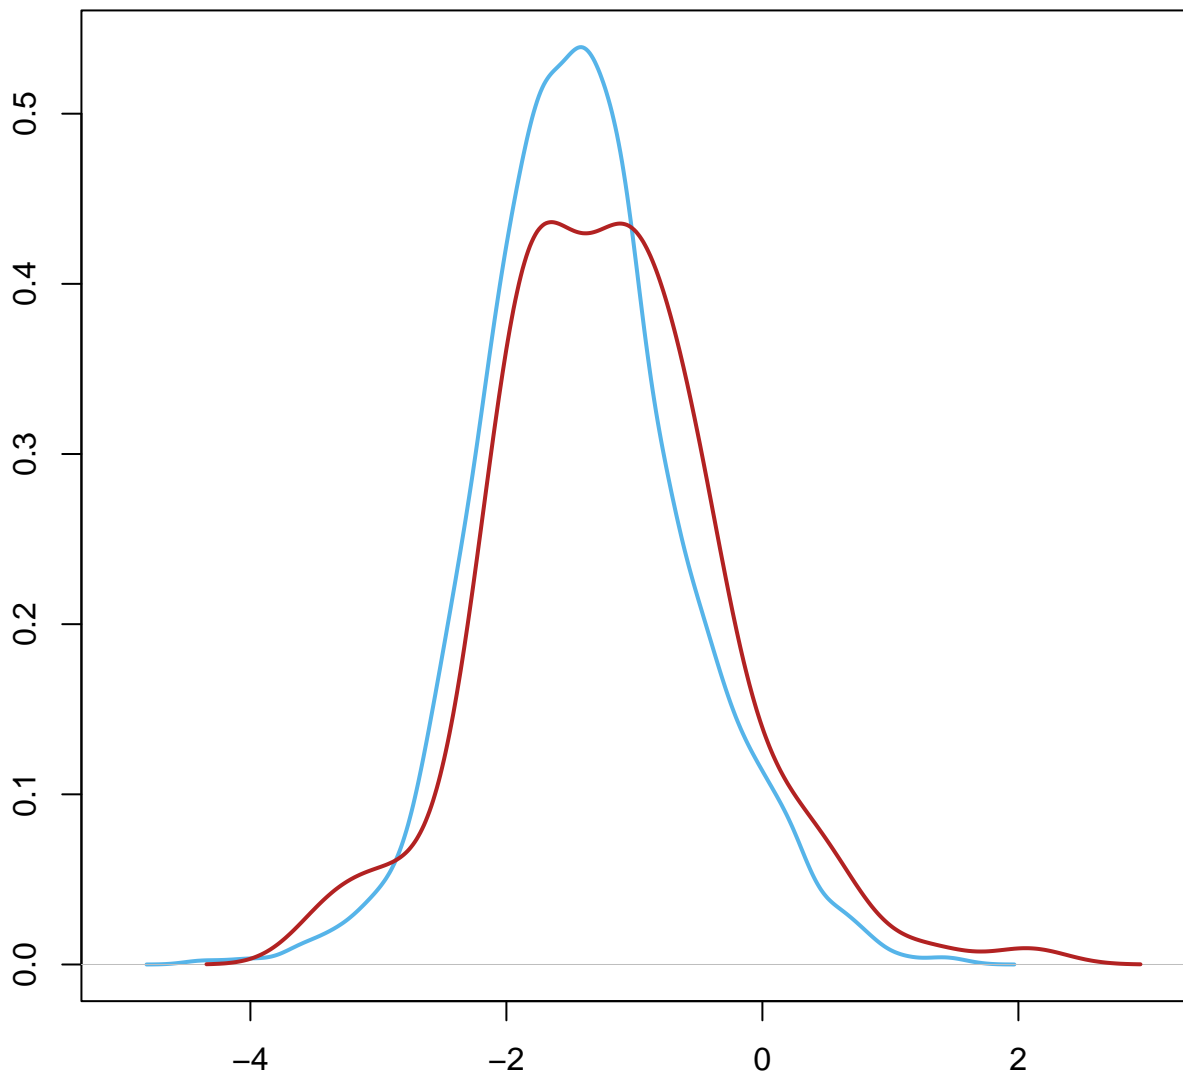



ln\_Cs

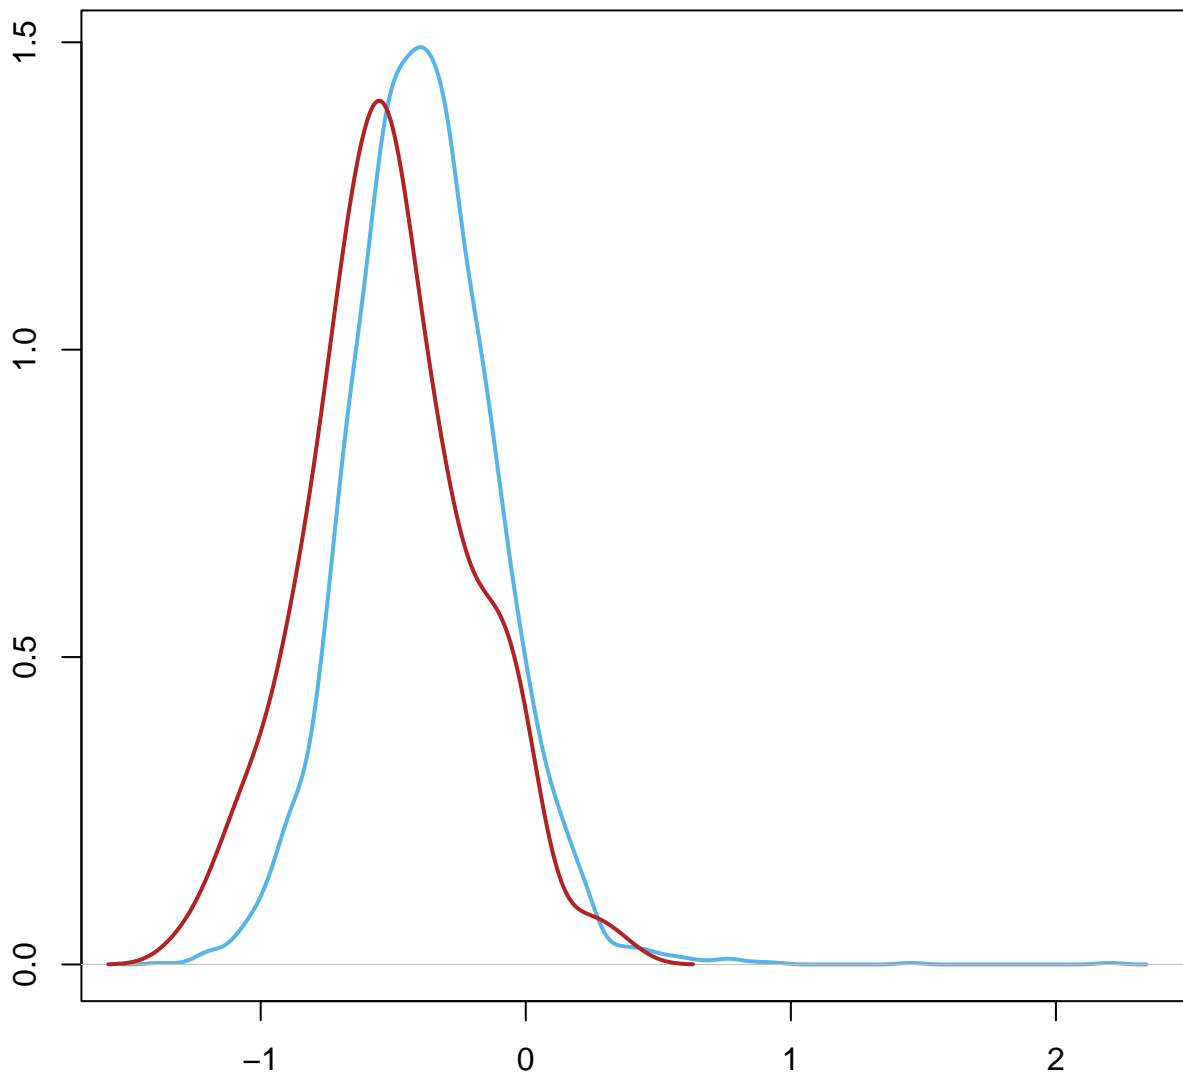

Supplement: Supporting_Figure_1.zip [file Supporting_Figure_1.zip]

In\_Na

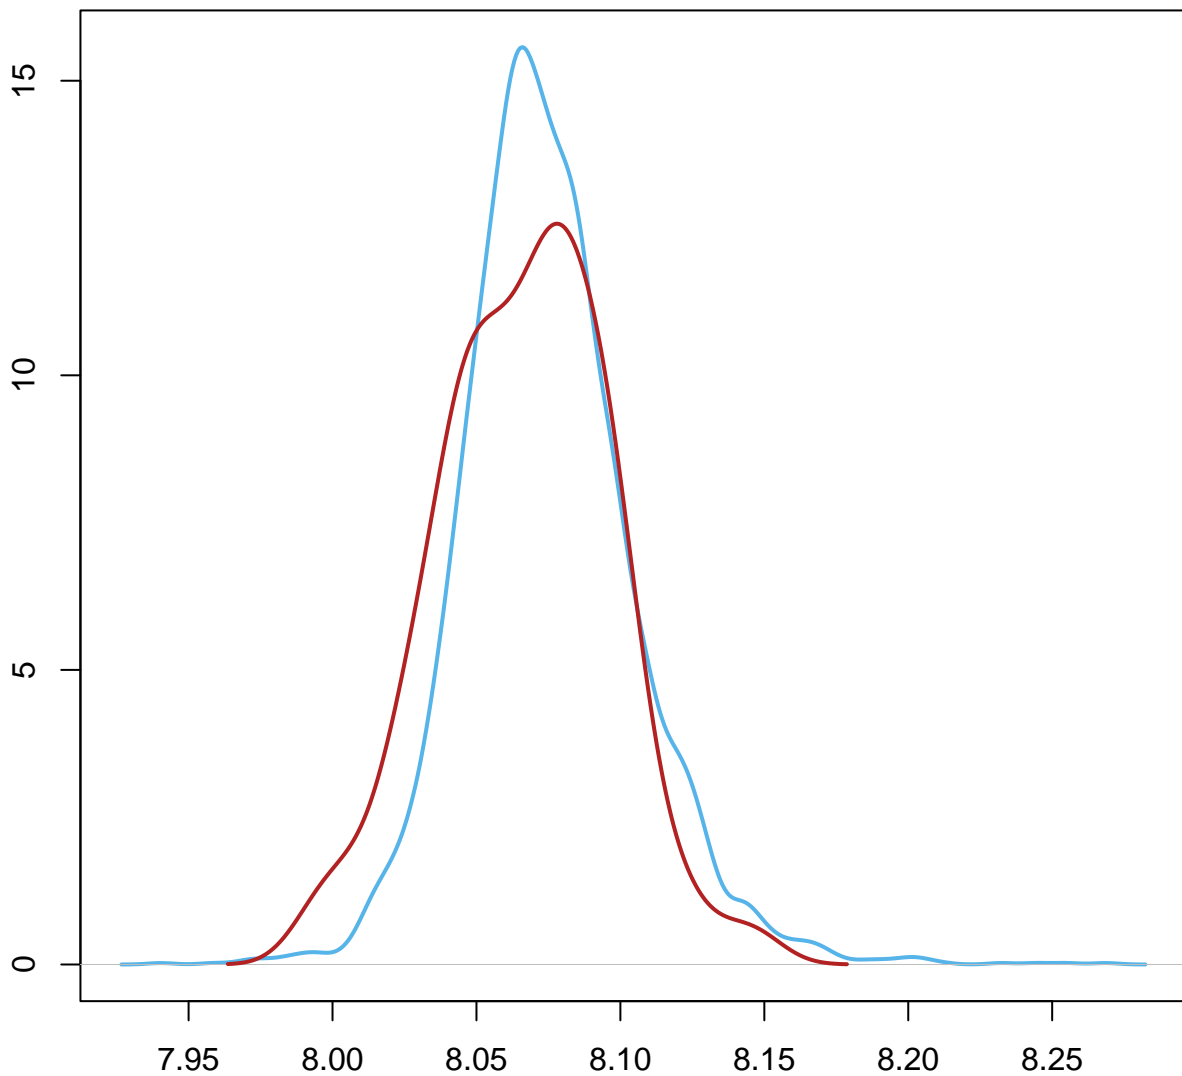

ln\_Mg

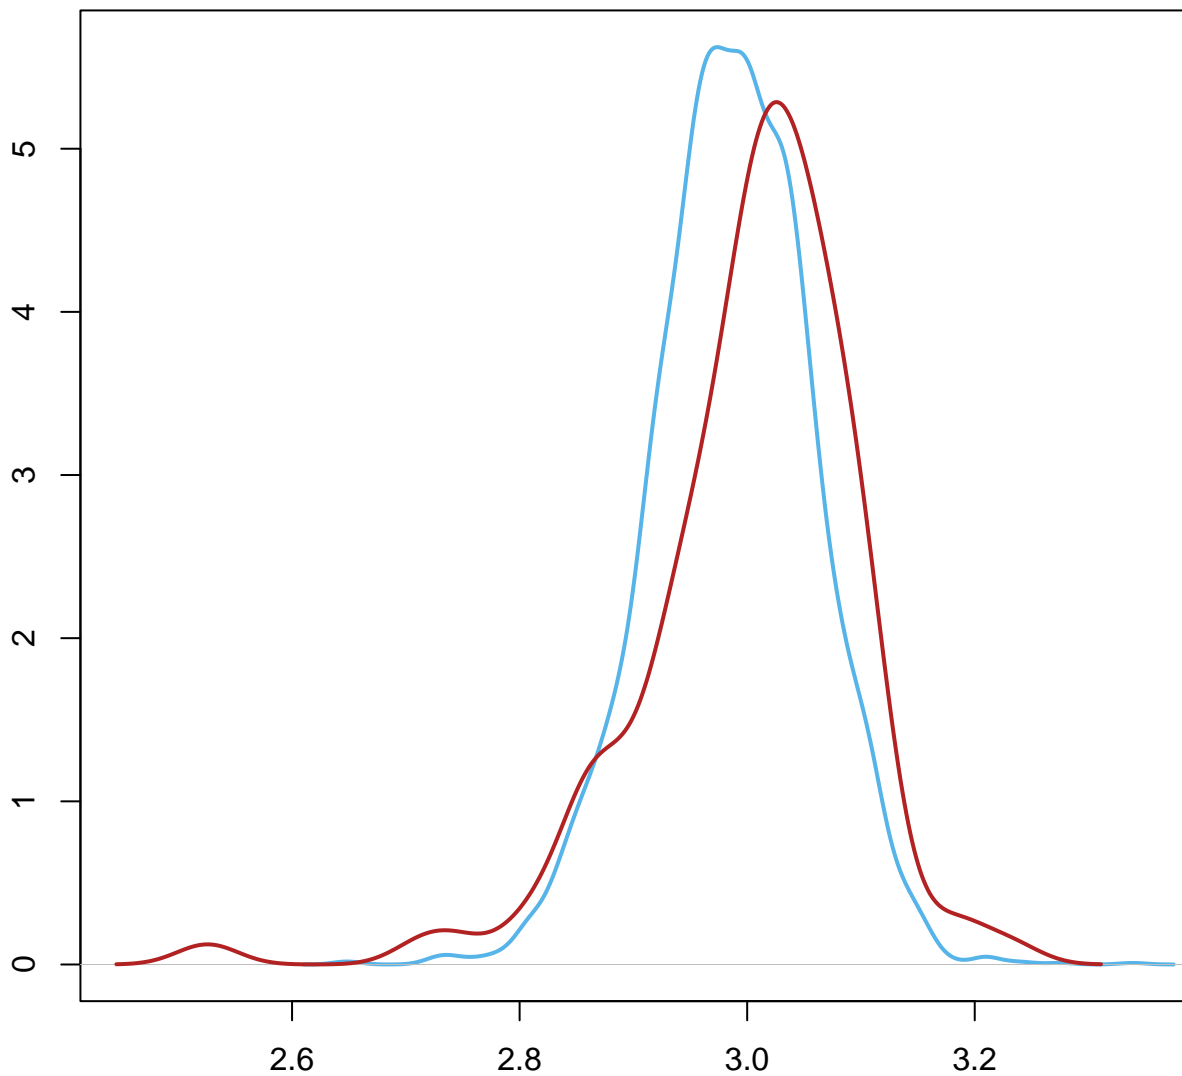

ln\_P

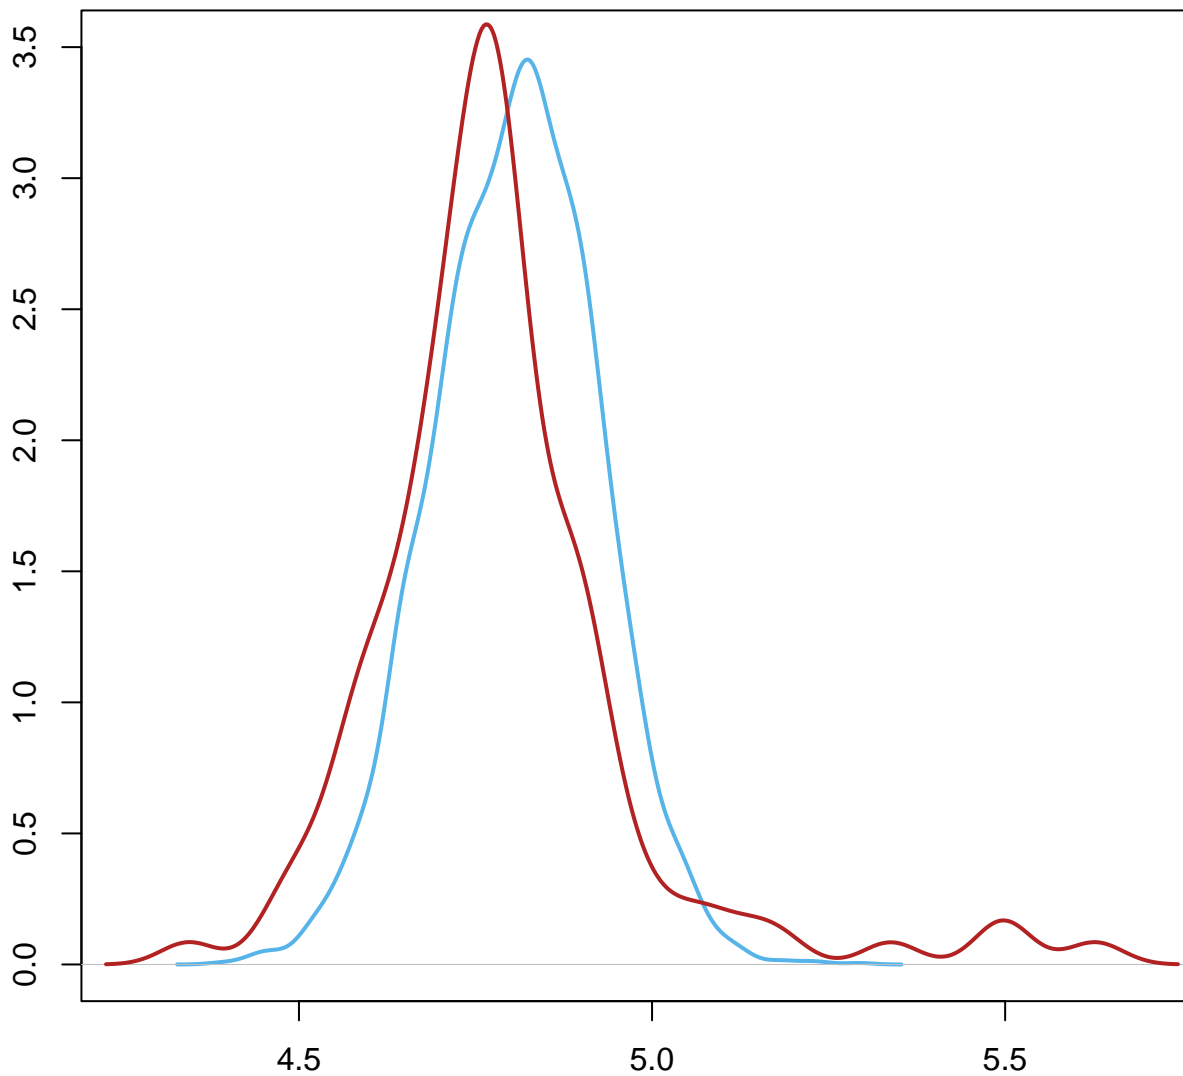

$\ln_S$

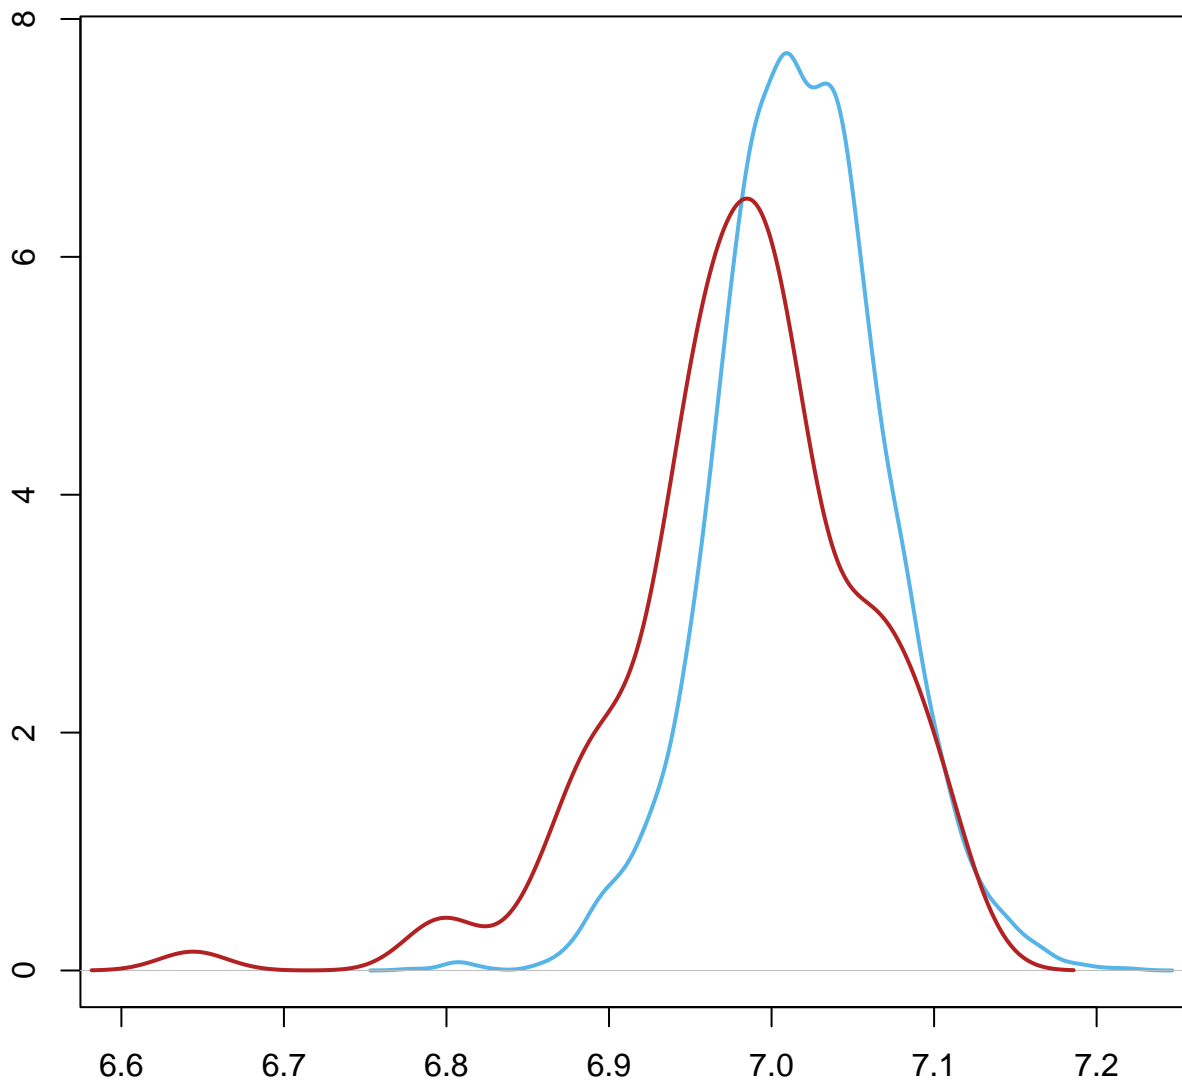

$\ln_K$

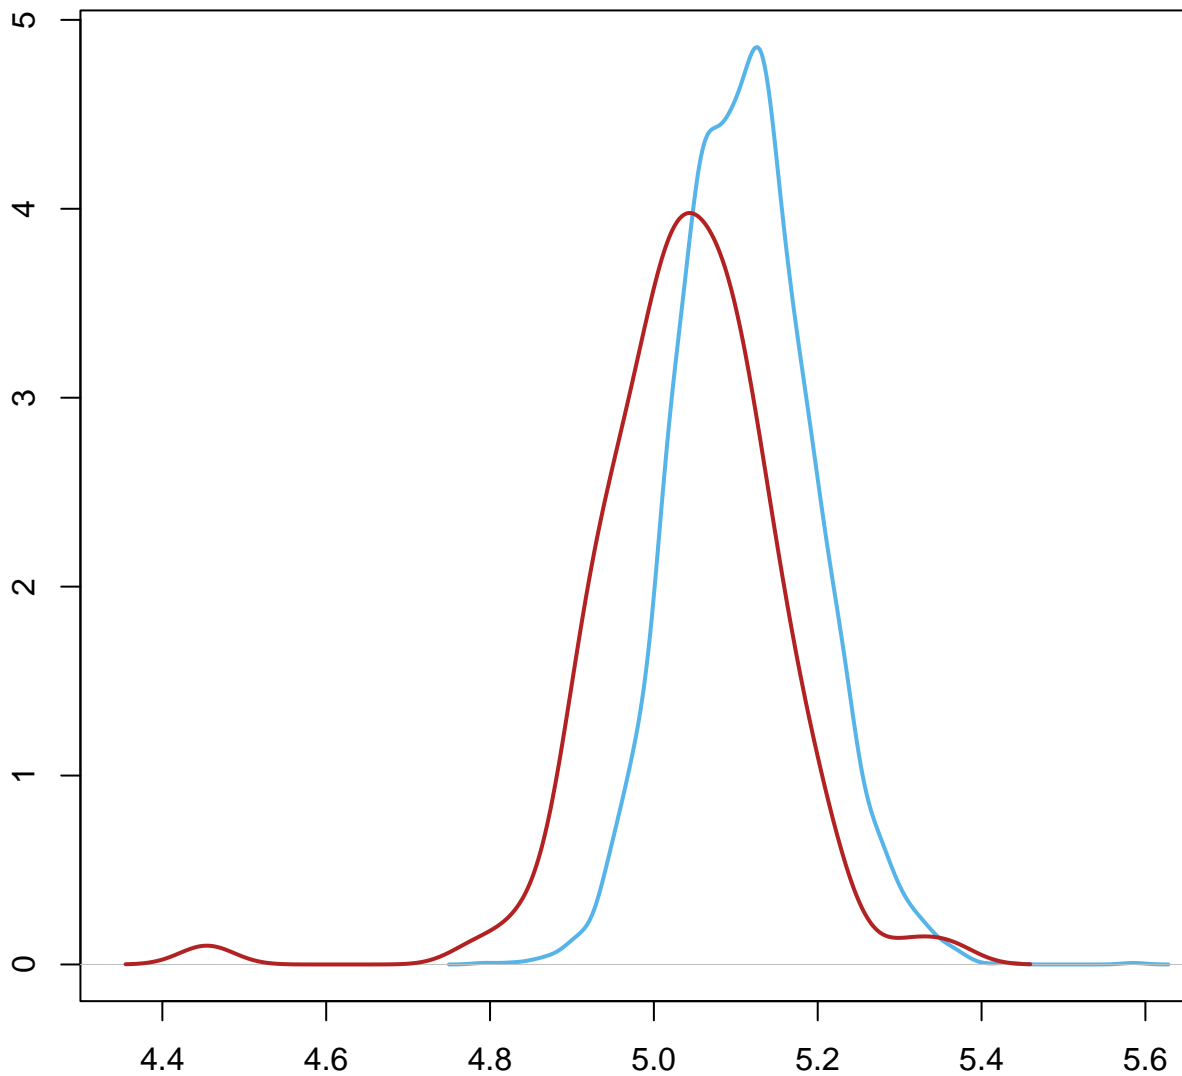

In\_Ca

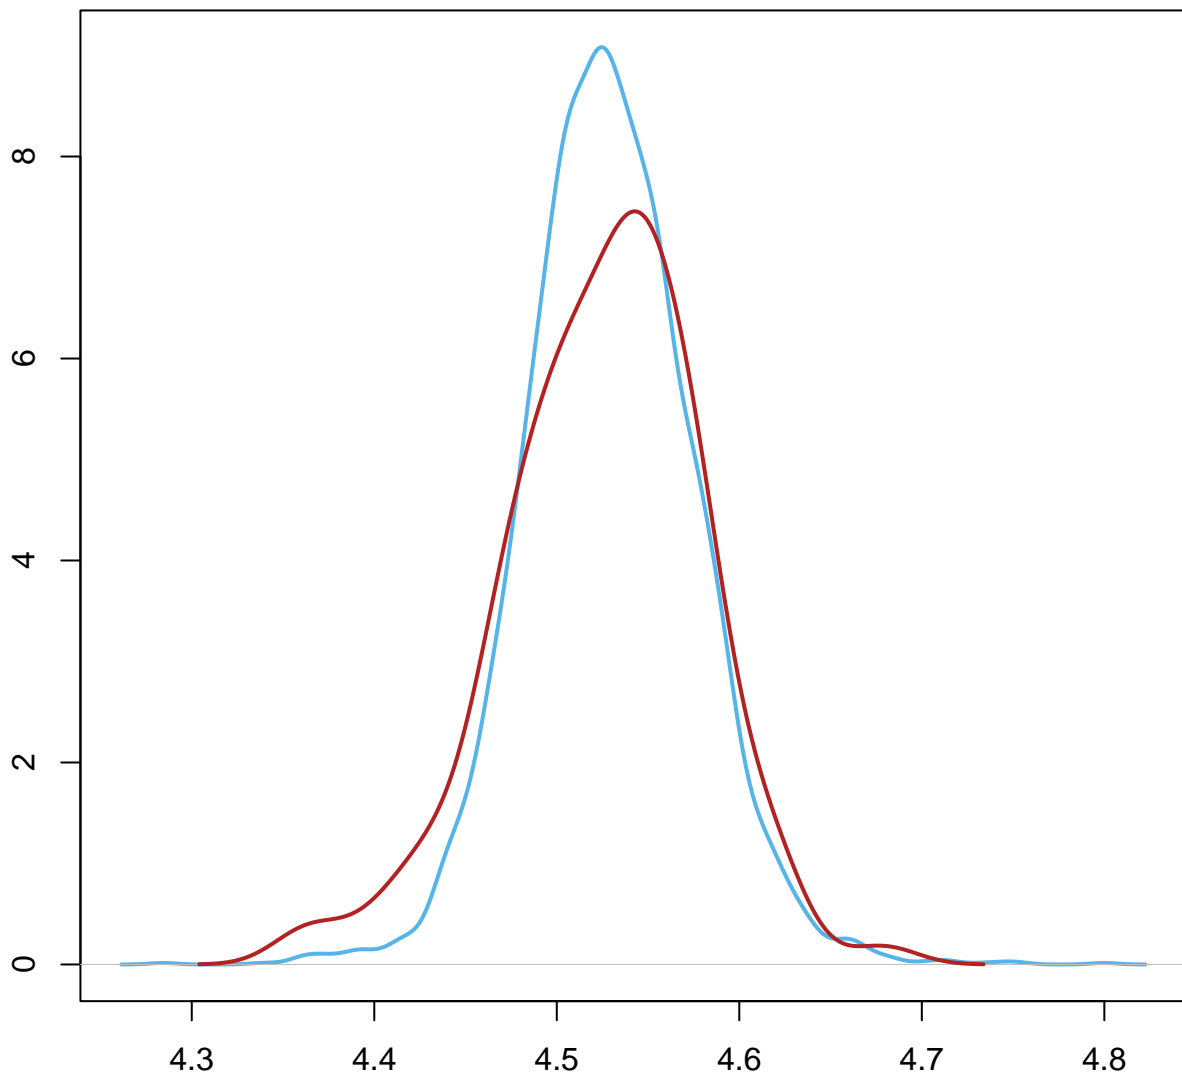

In\_Fe

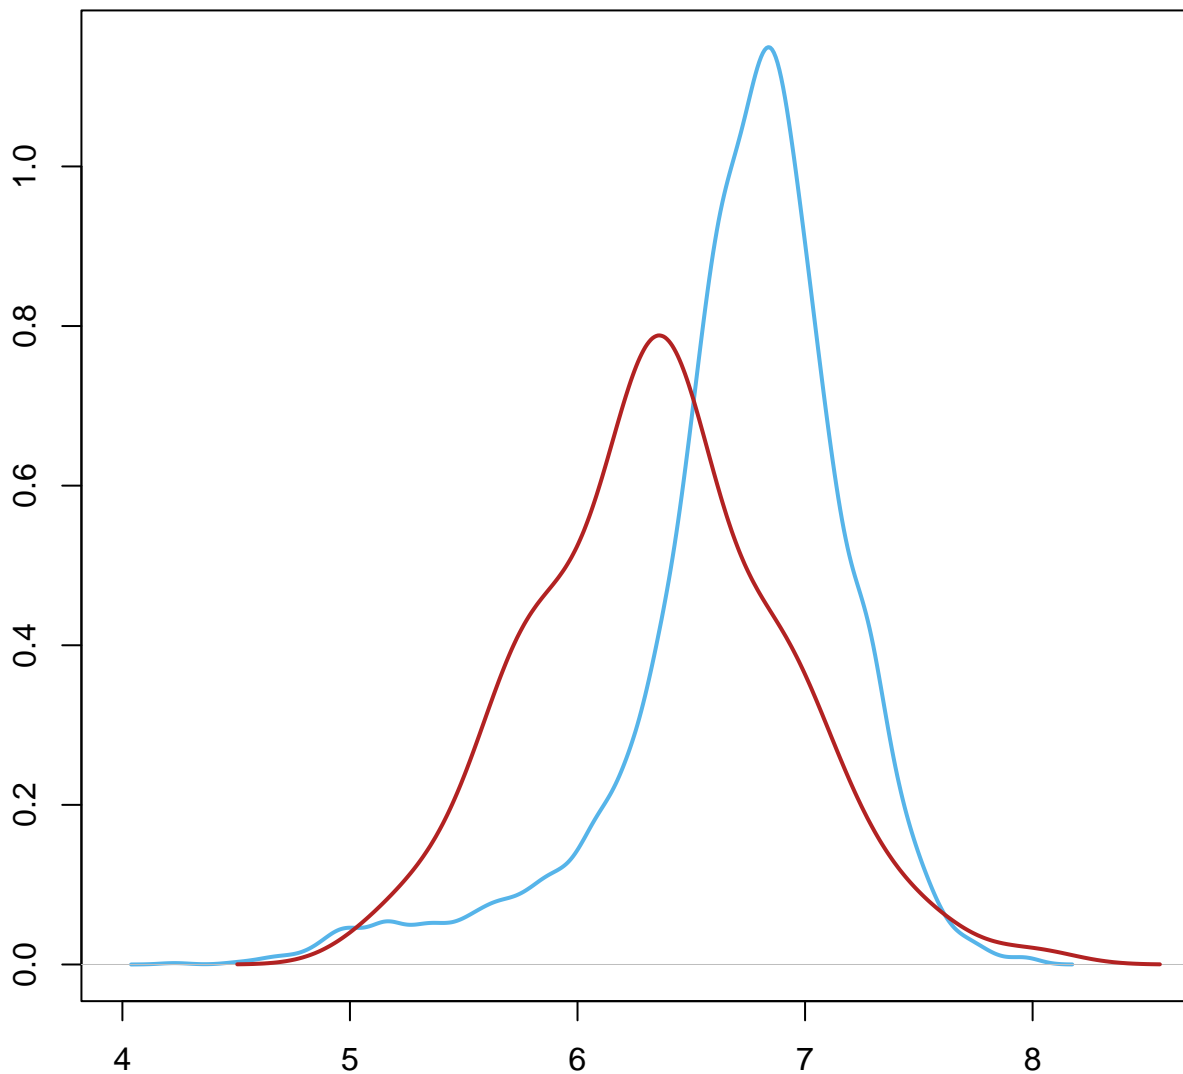

In\_Co

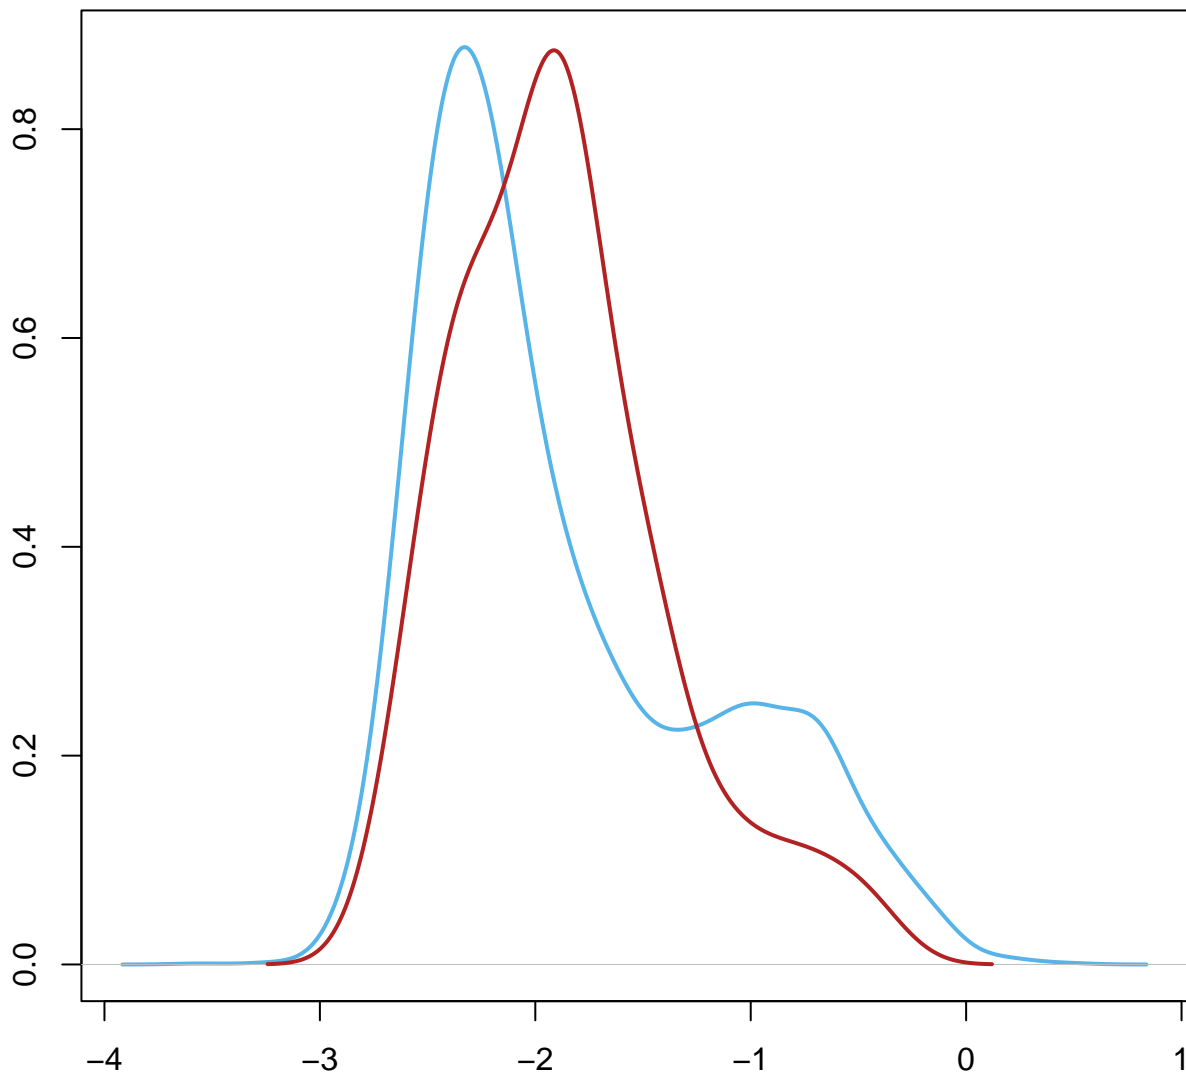



In\_Cu

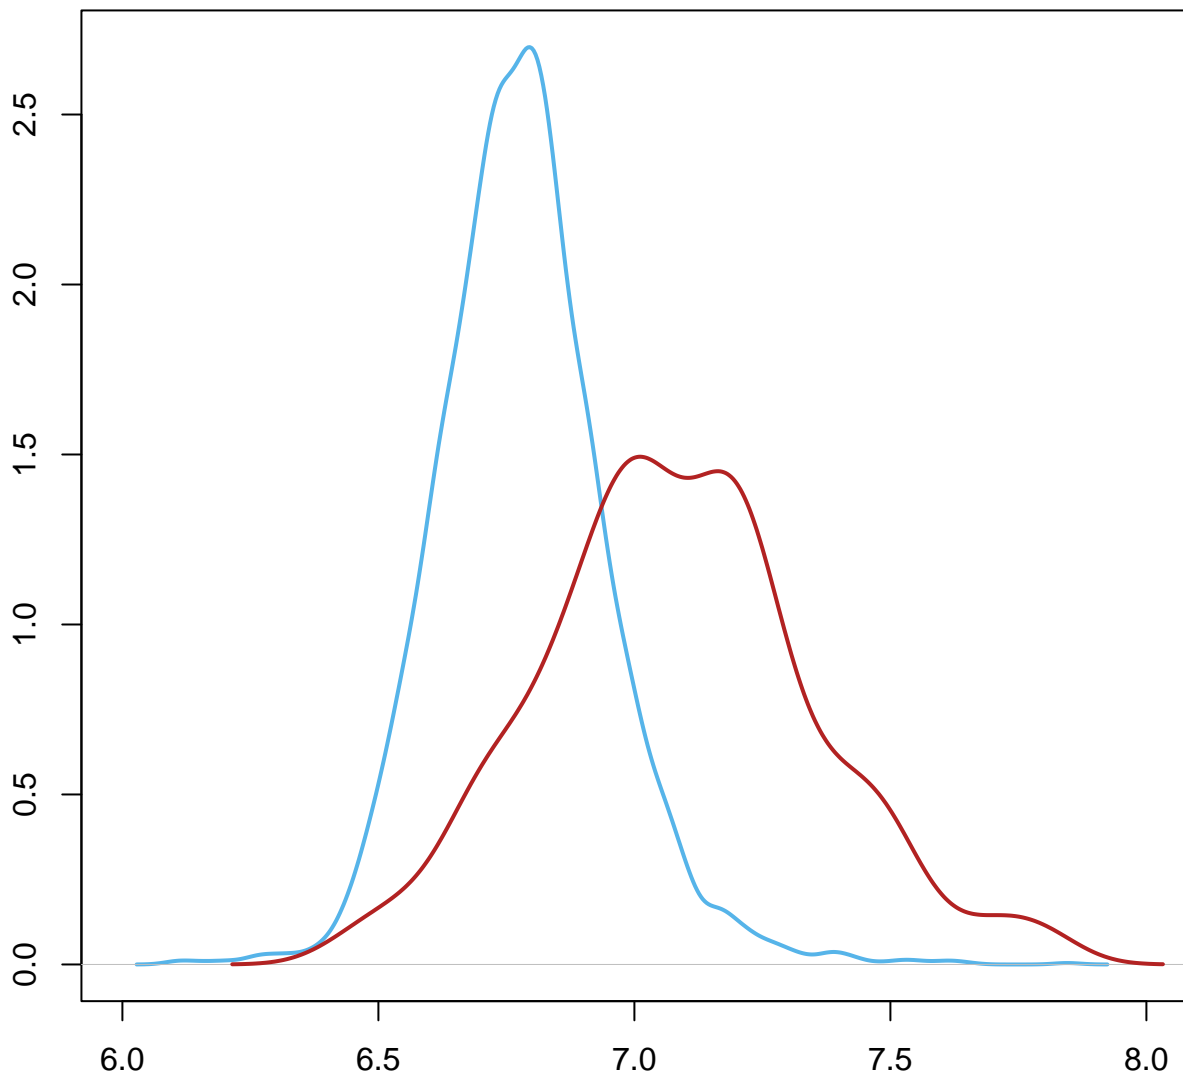

ln\_Zn

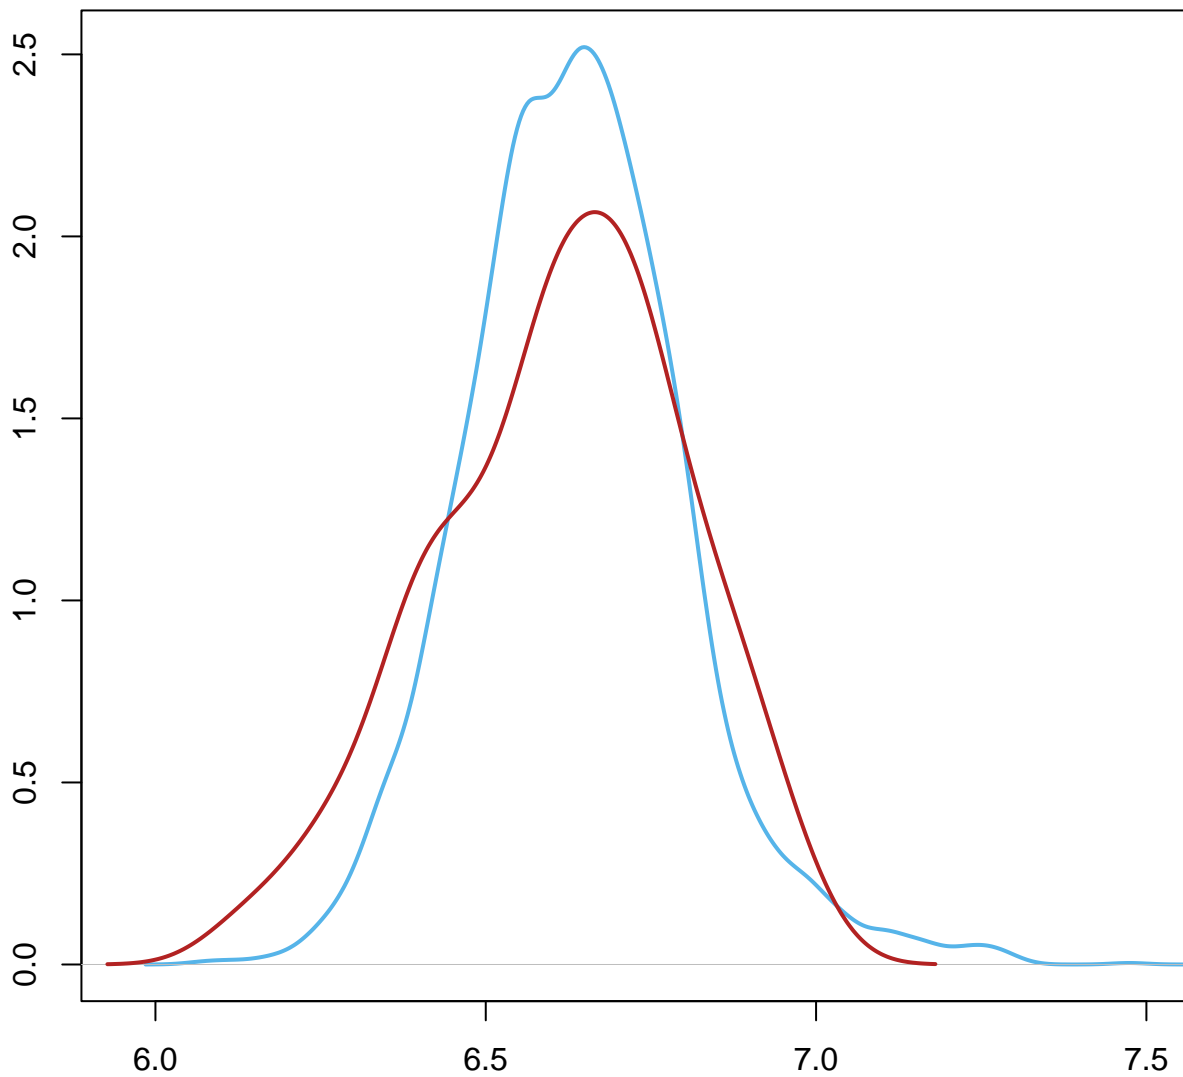

**ln\_As**

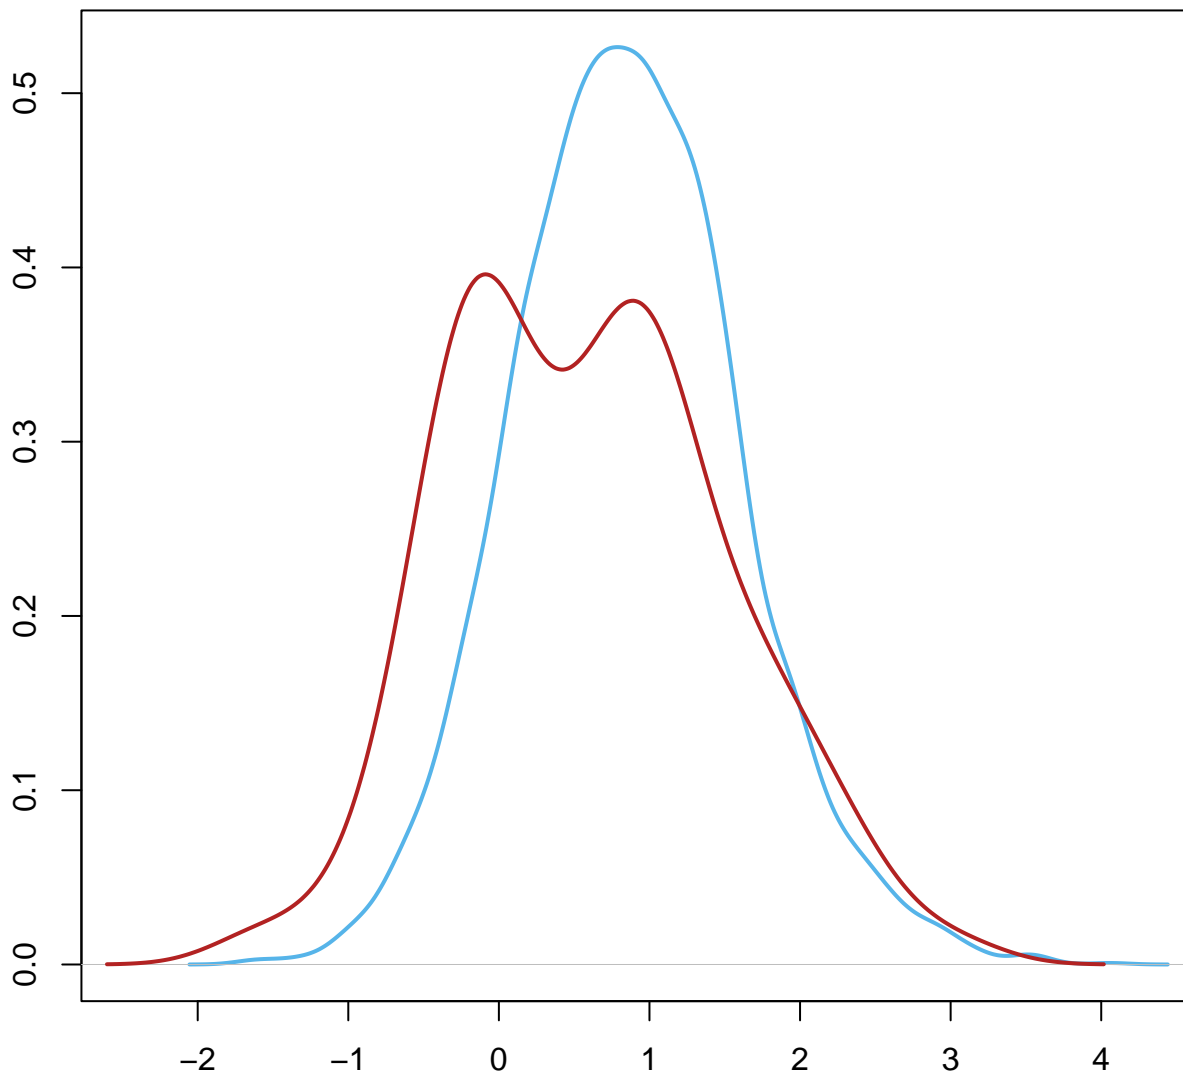

In\_Se

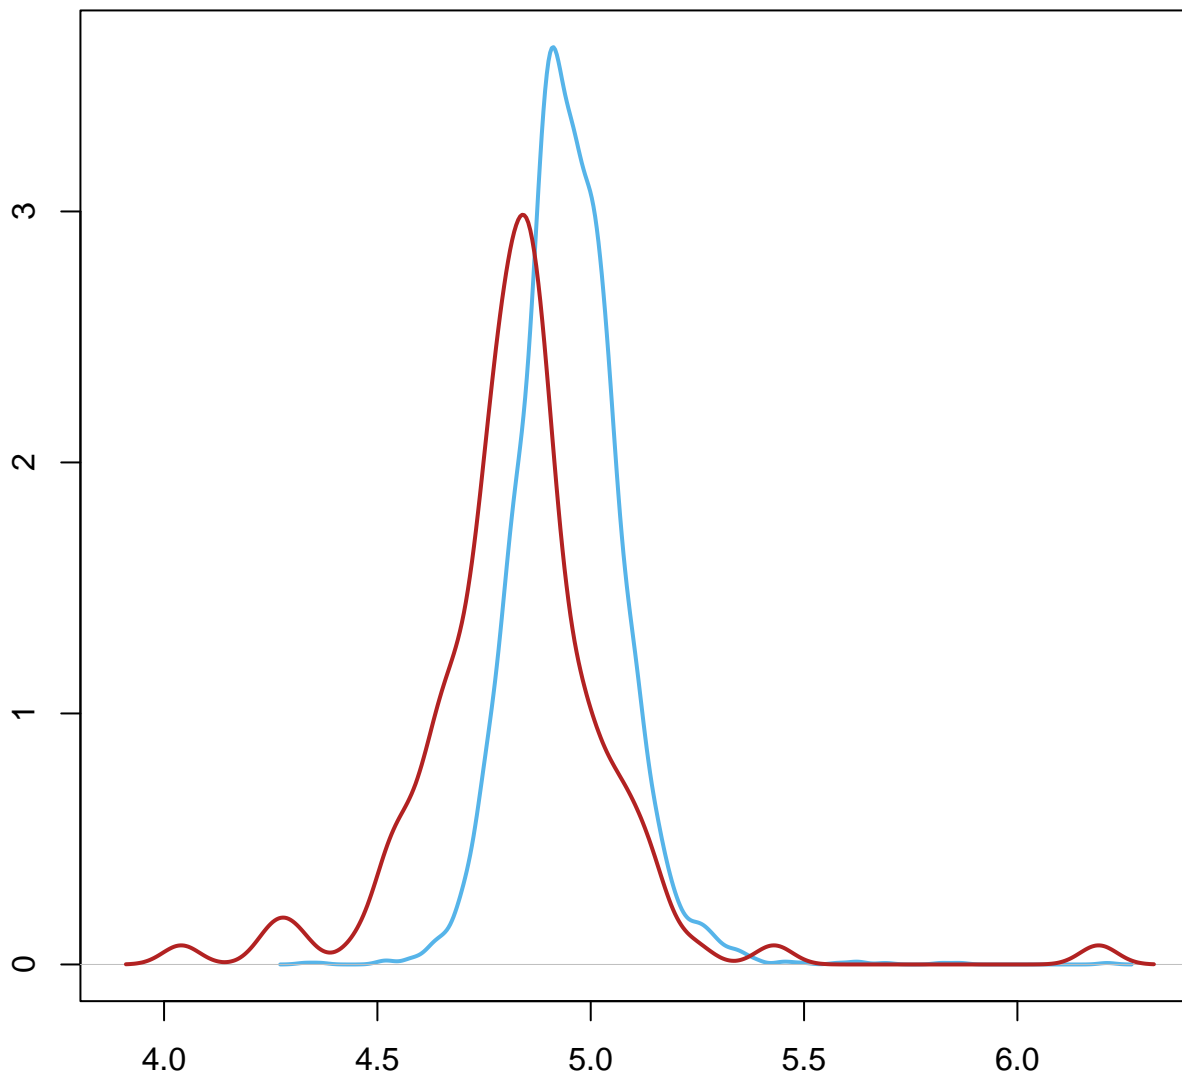

**ln\_Rb**

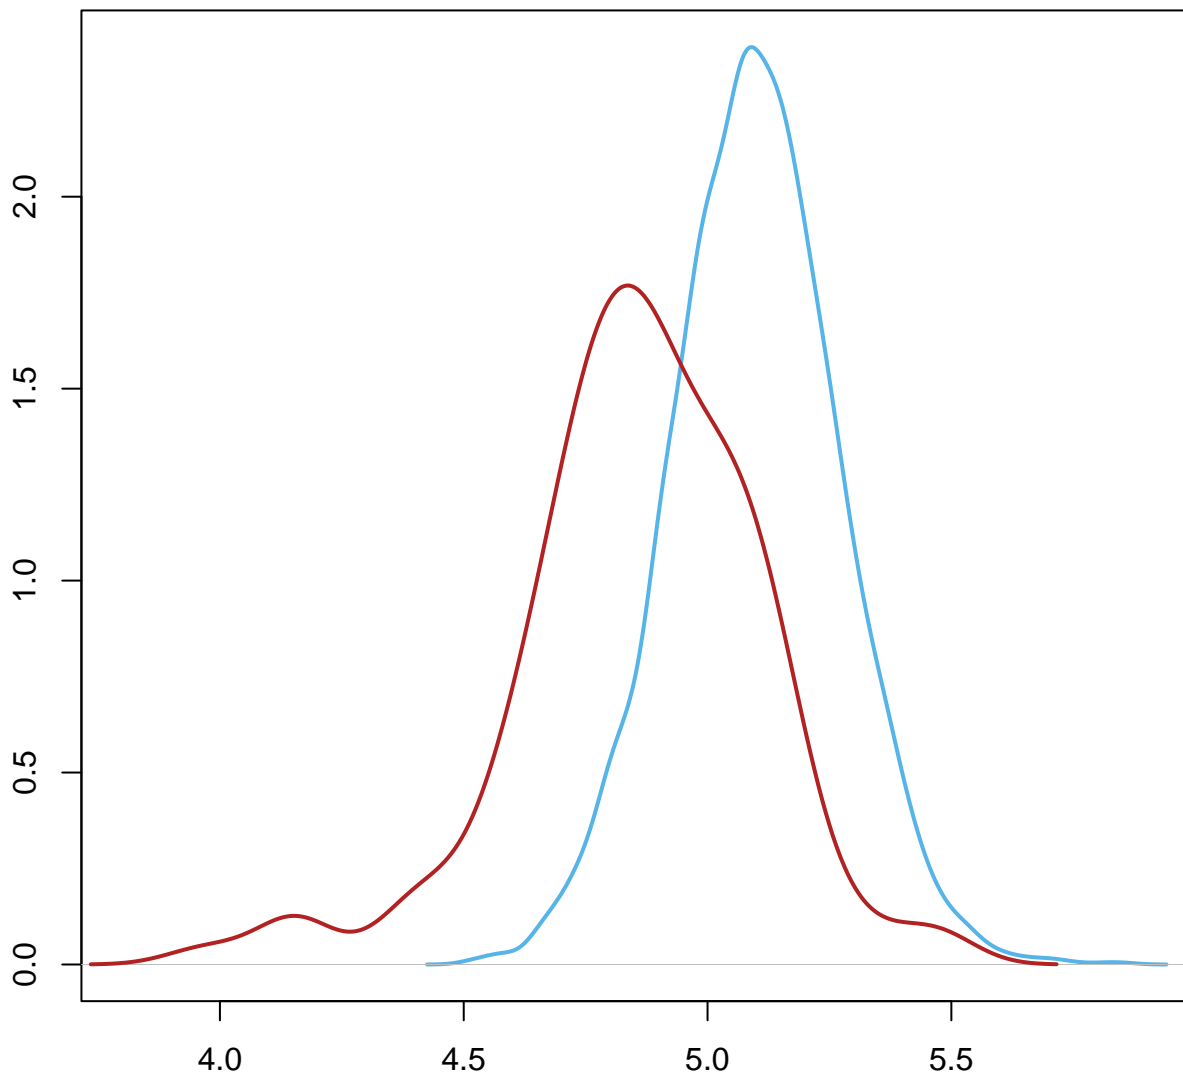

In\_Sr

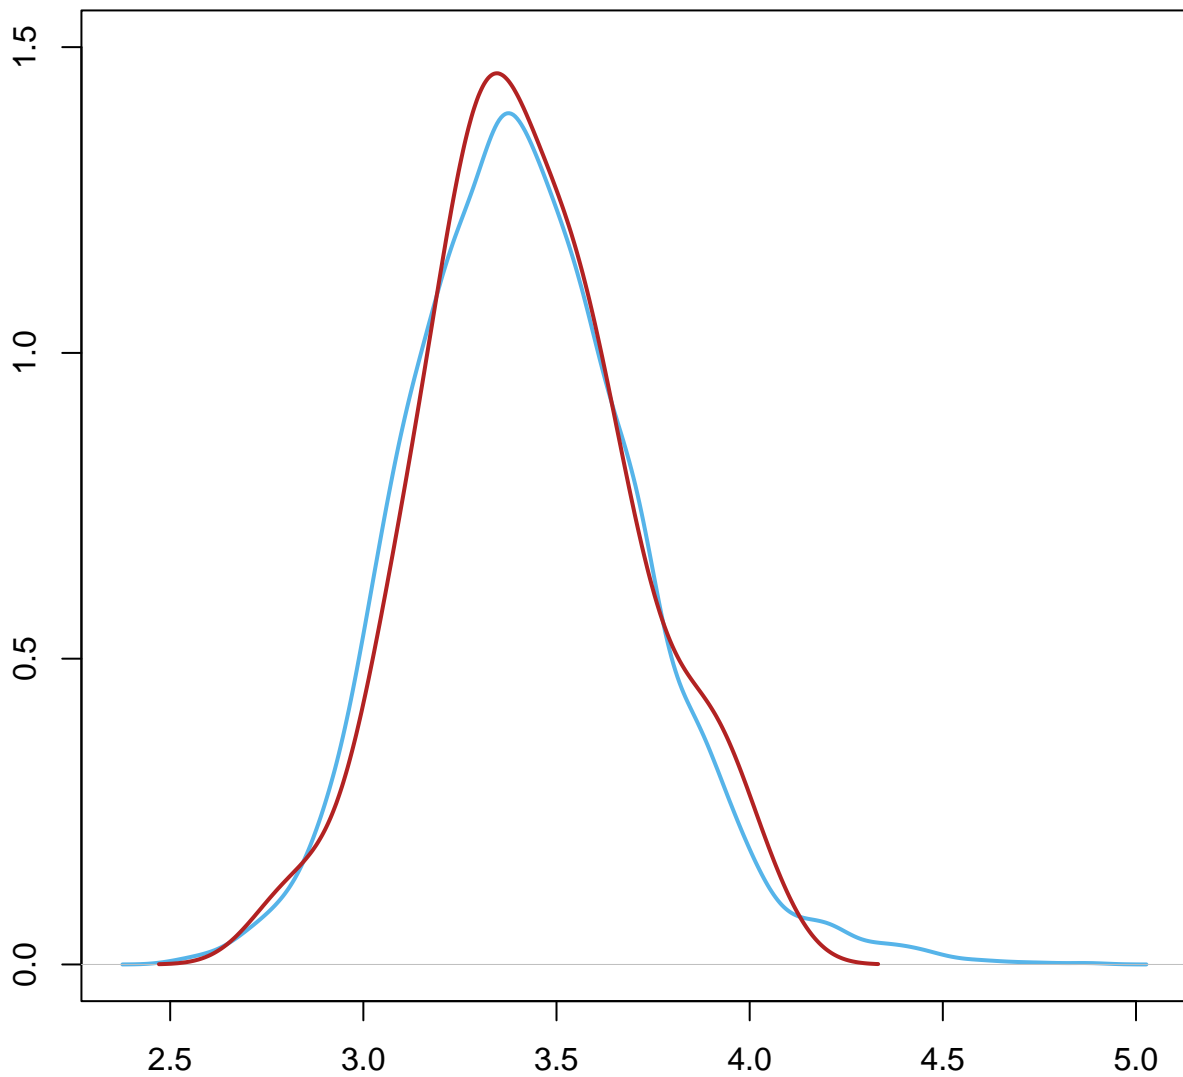

In\_Mo

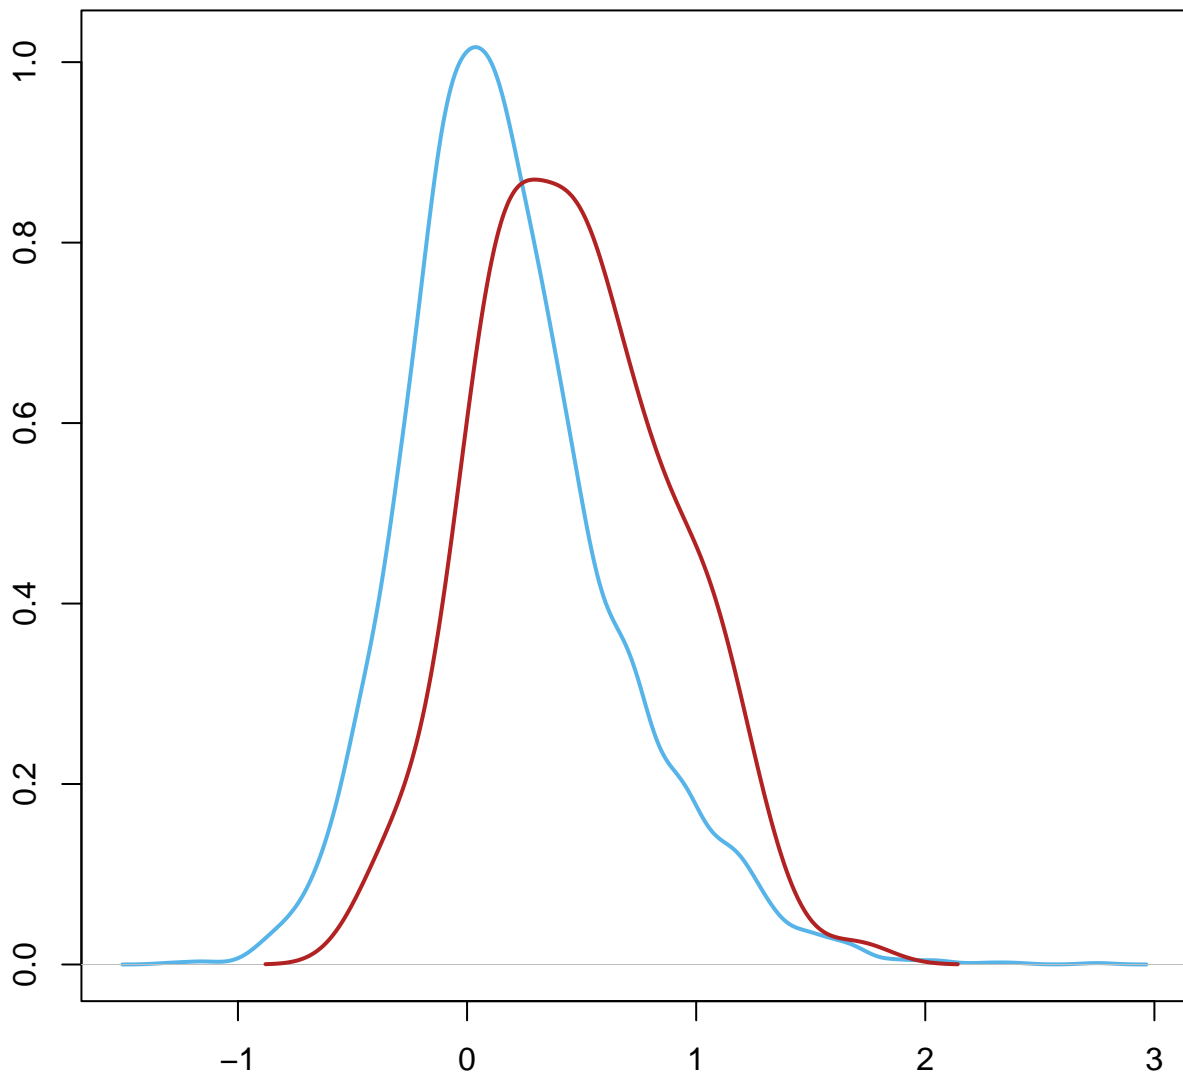

In\_Ag

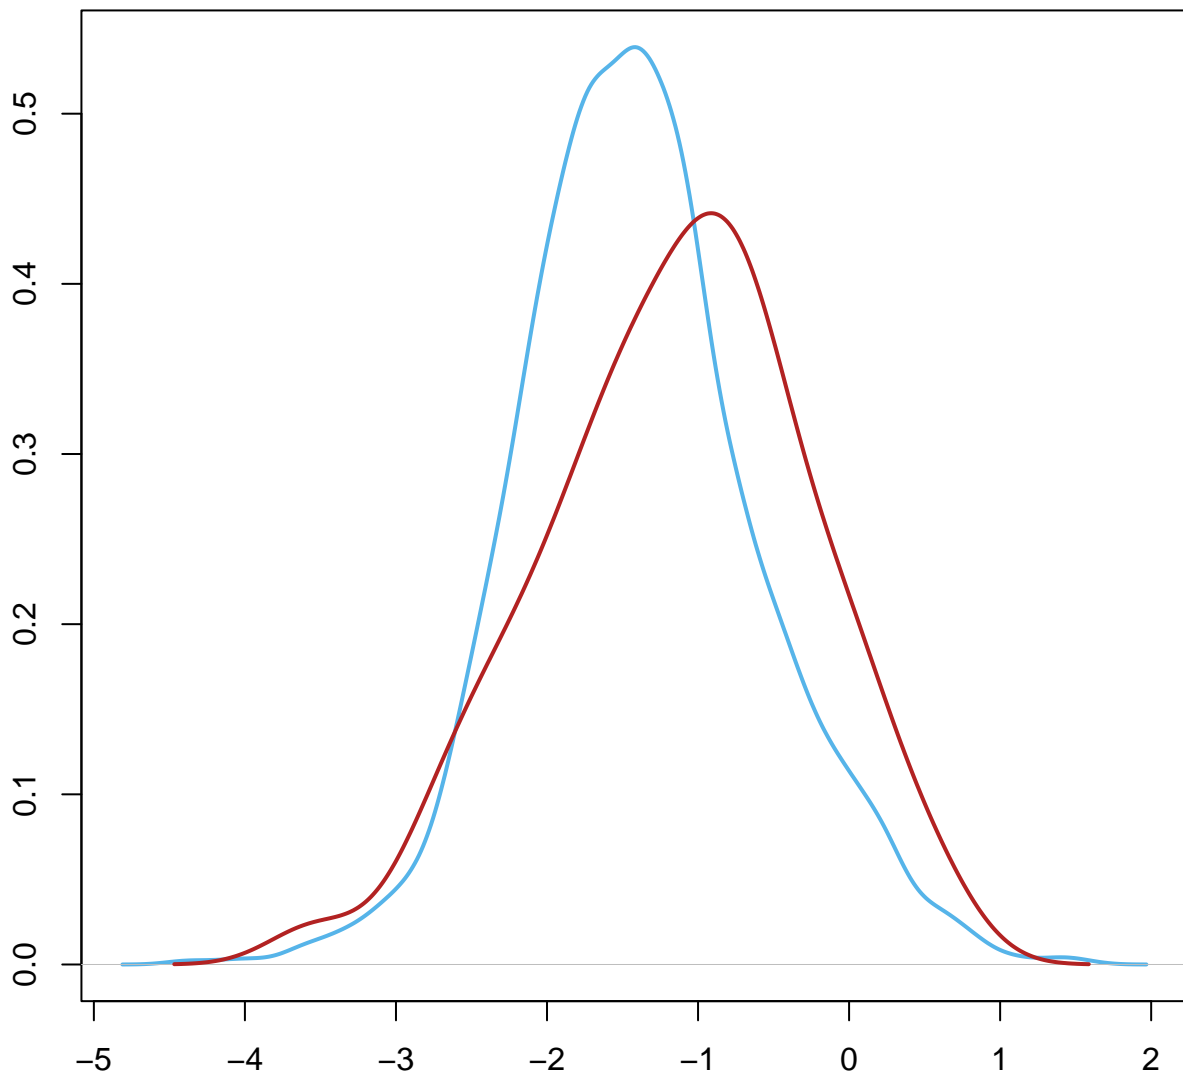



In\_Cs

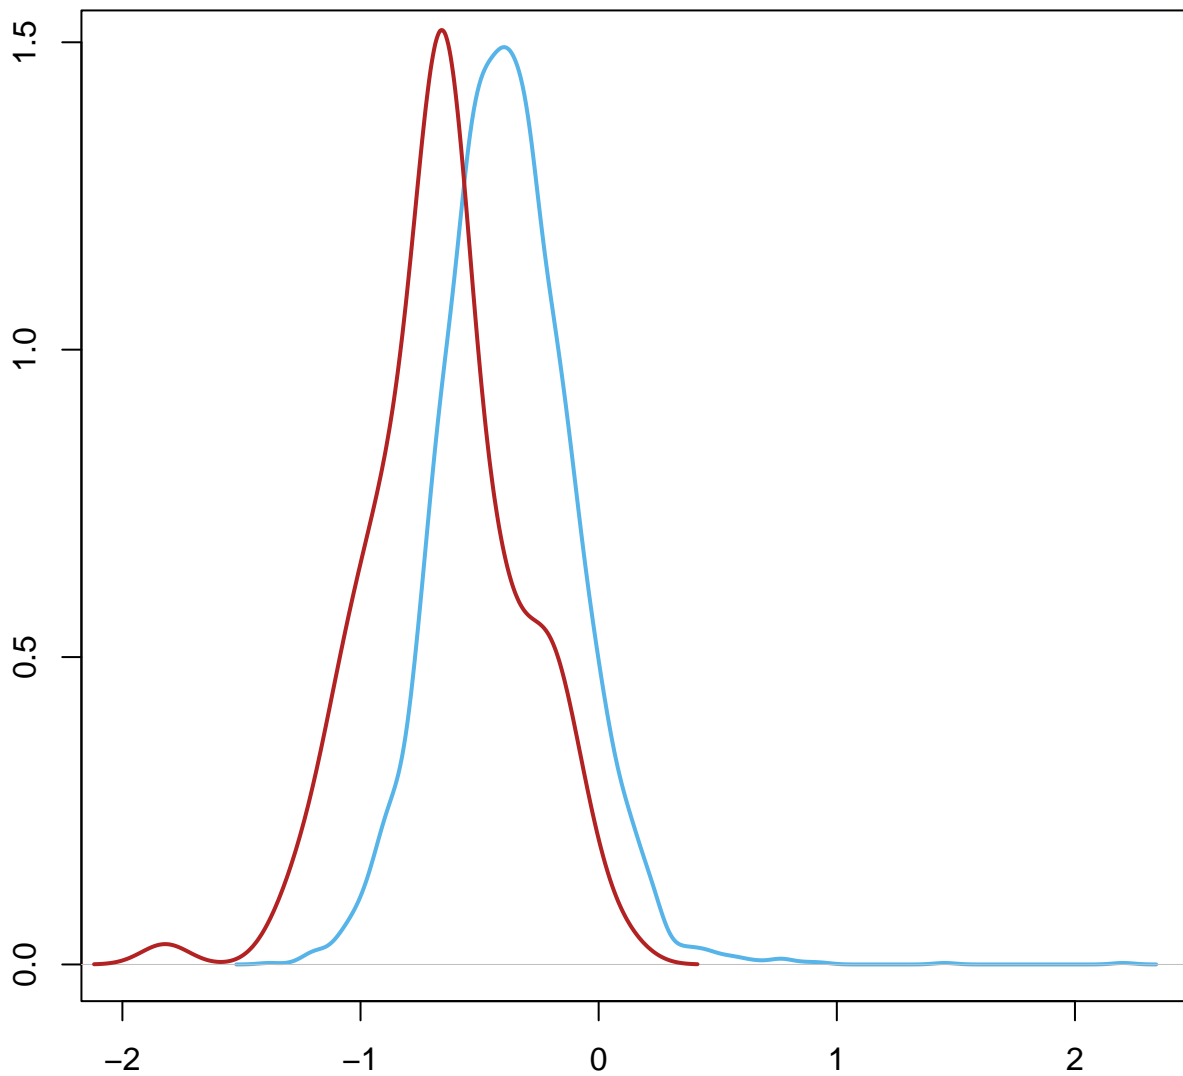

Supplement: Supporting_Figure_1.zip [file Supporting_Figure_1.zip]

In\_Na

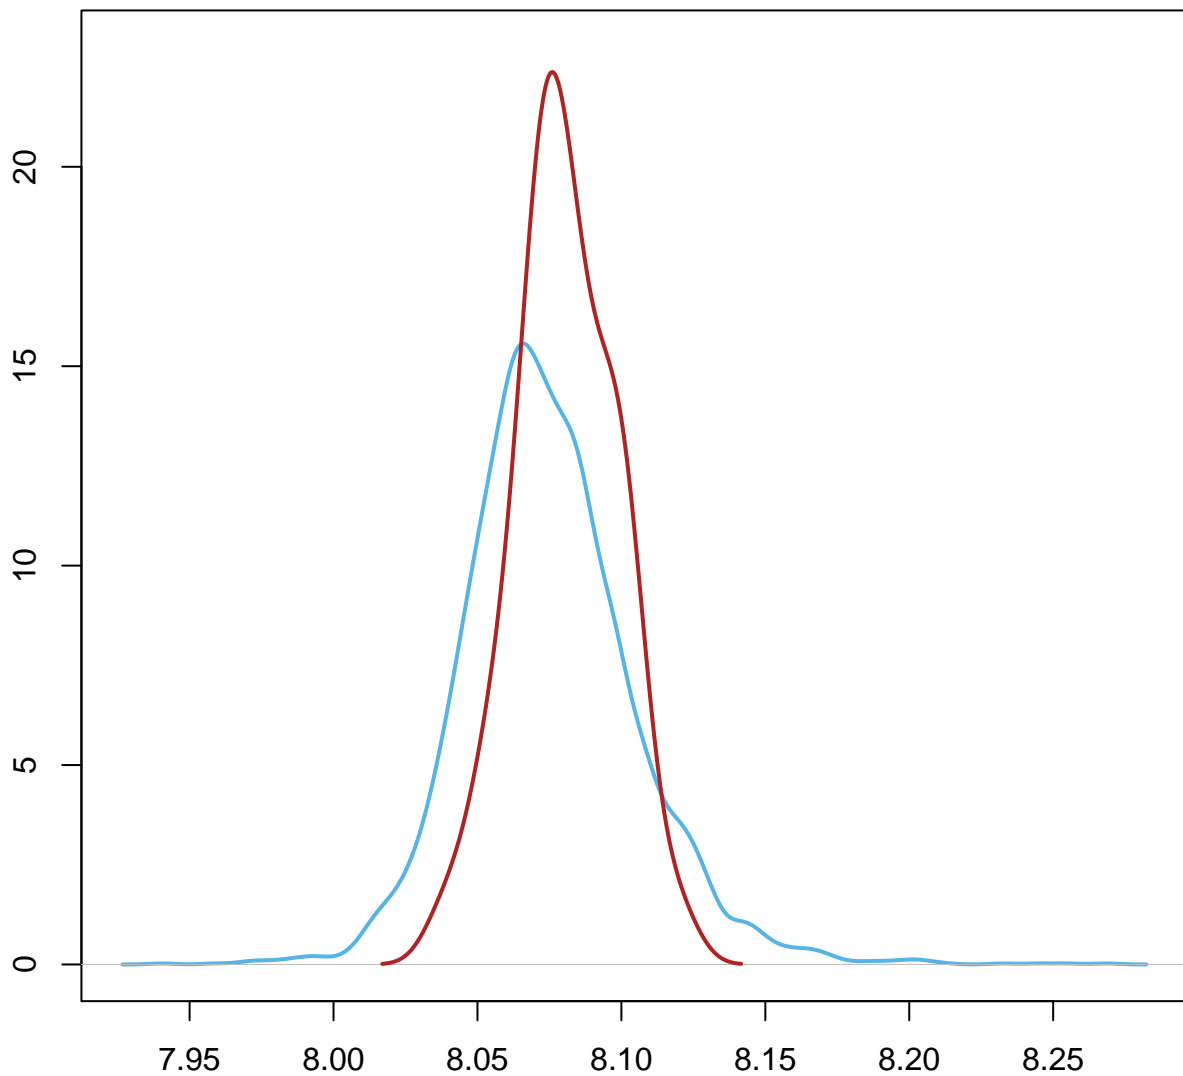

ln\_Mg

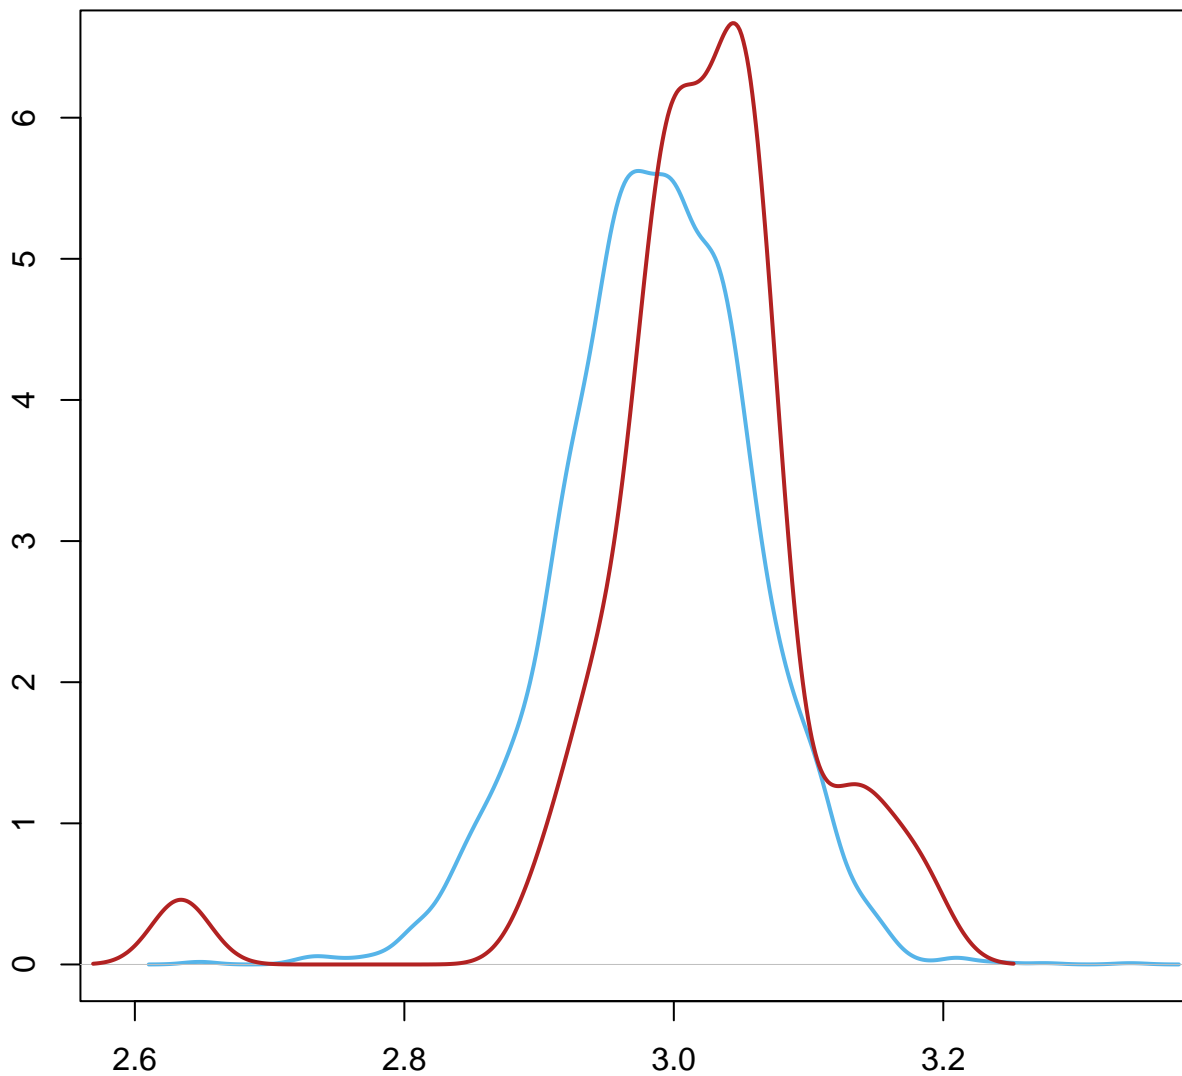

ln\_P

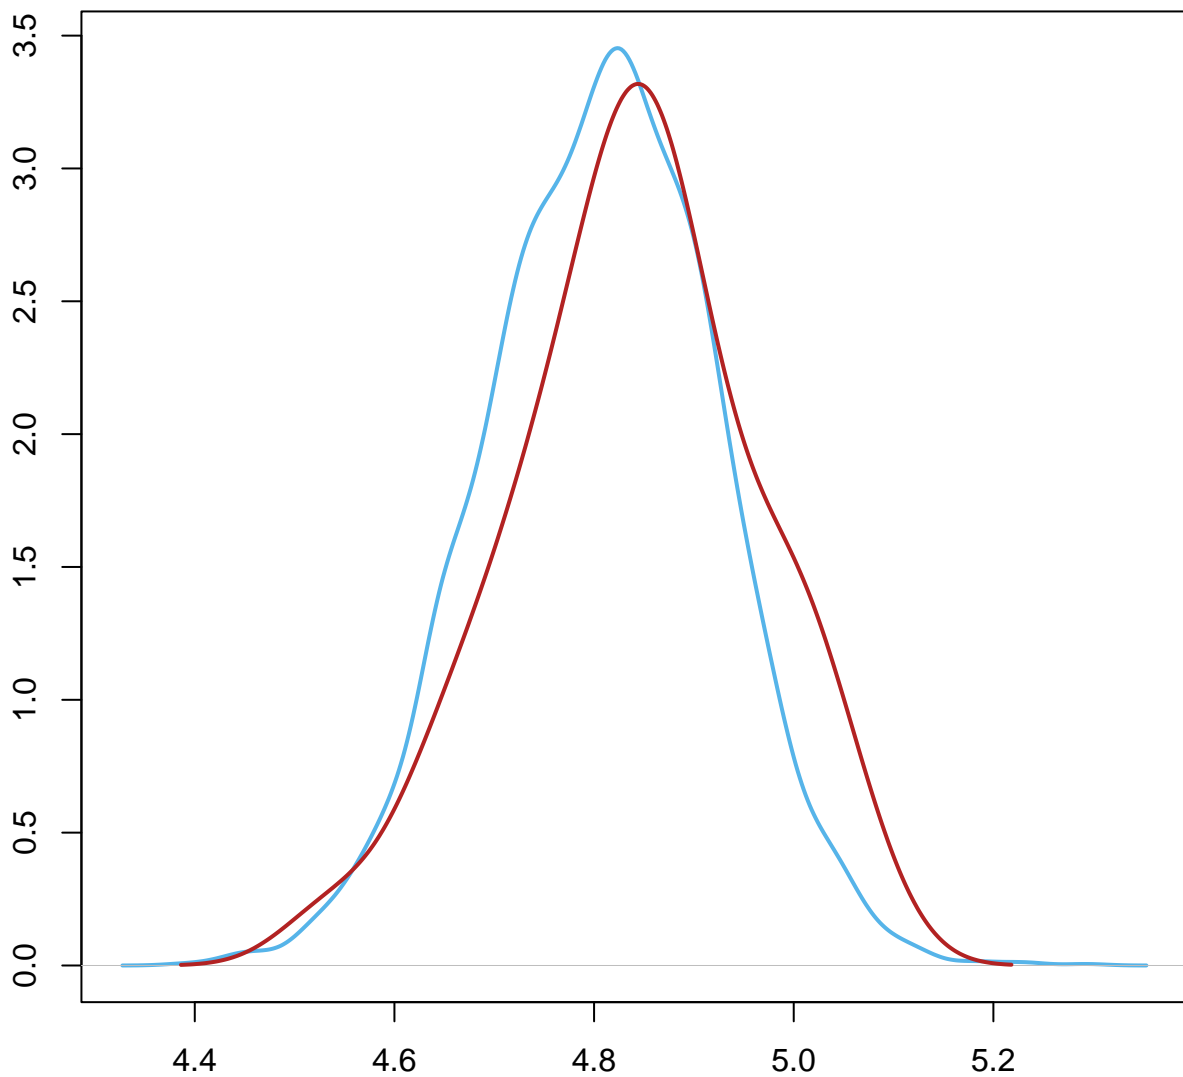

ln\_S

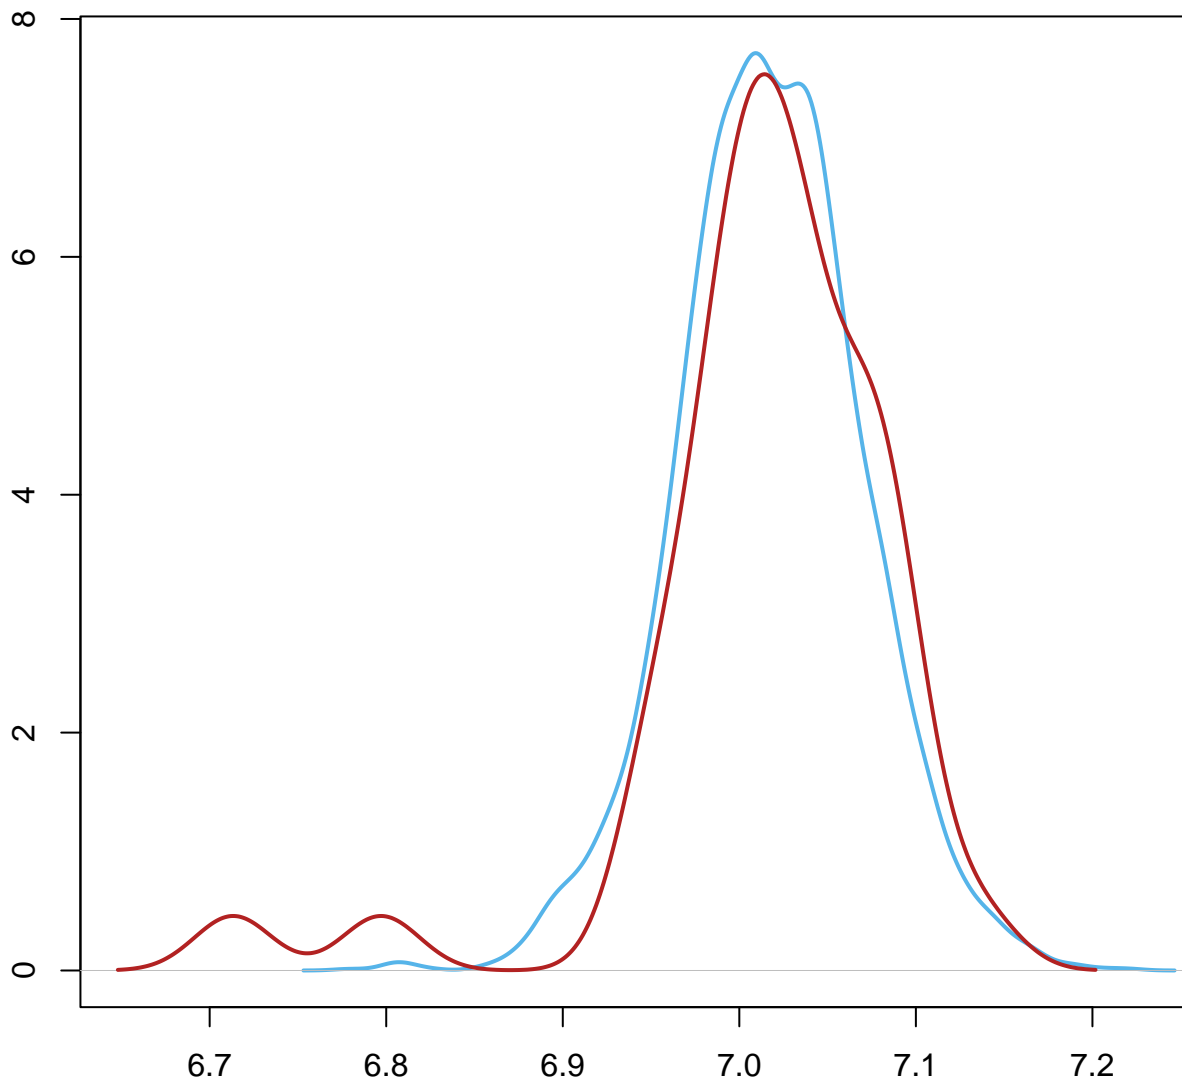

ln\_K

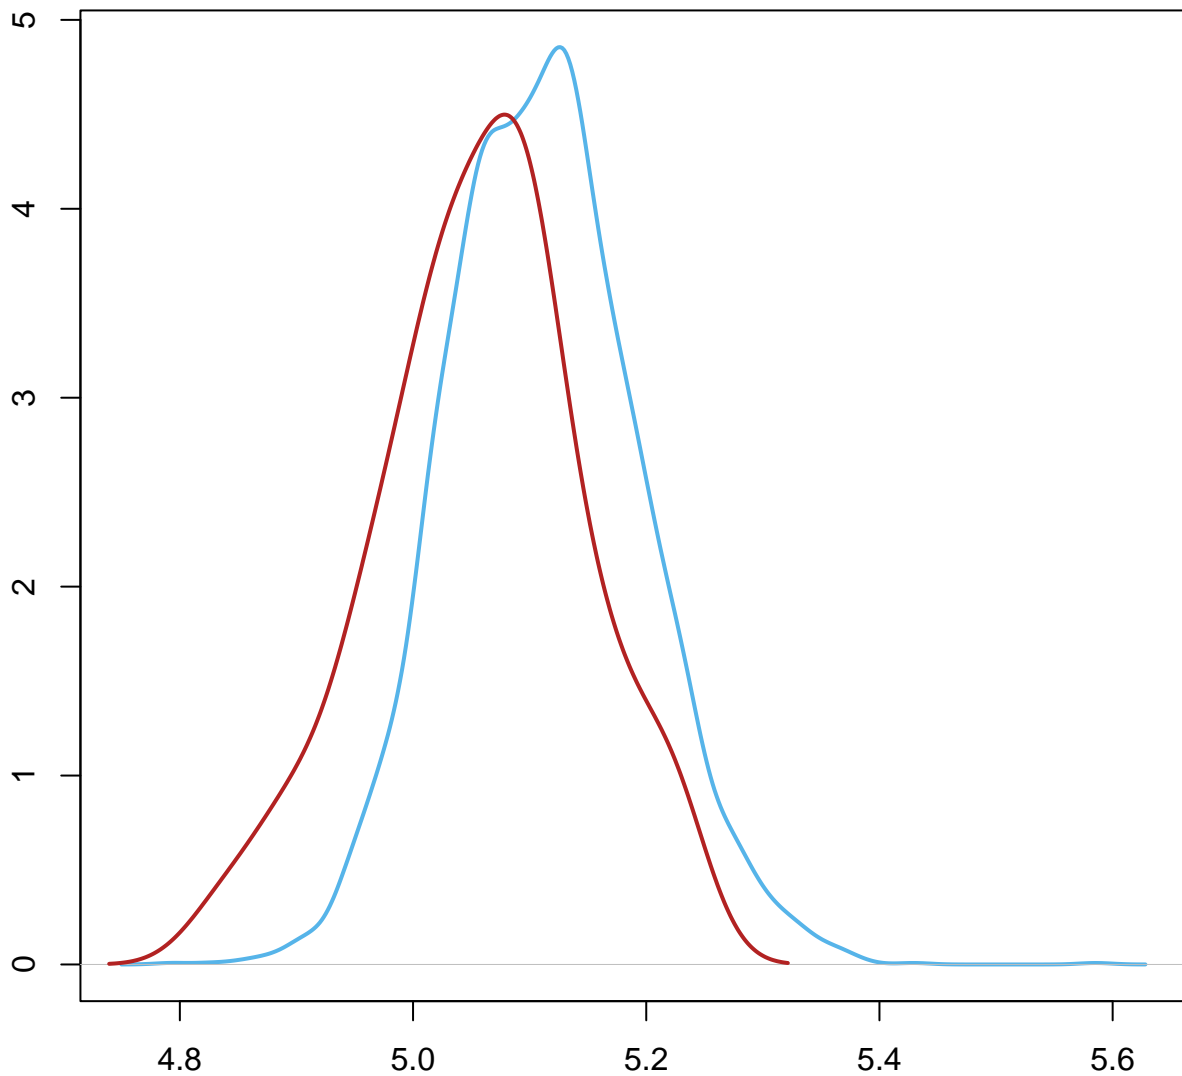

In\_Ca

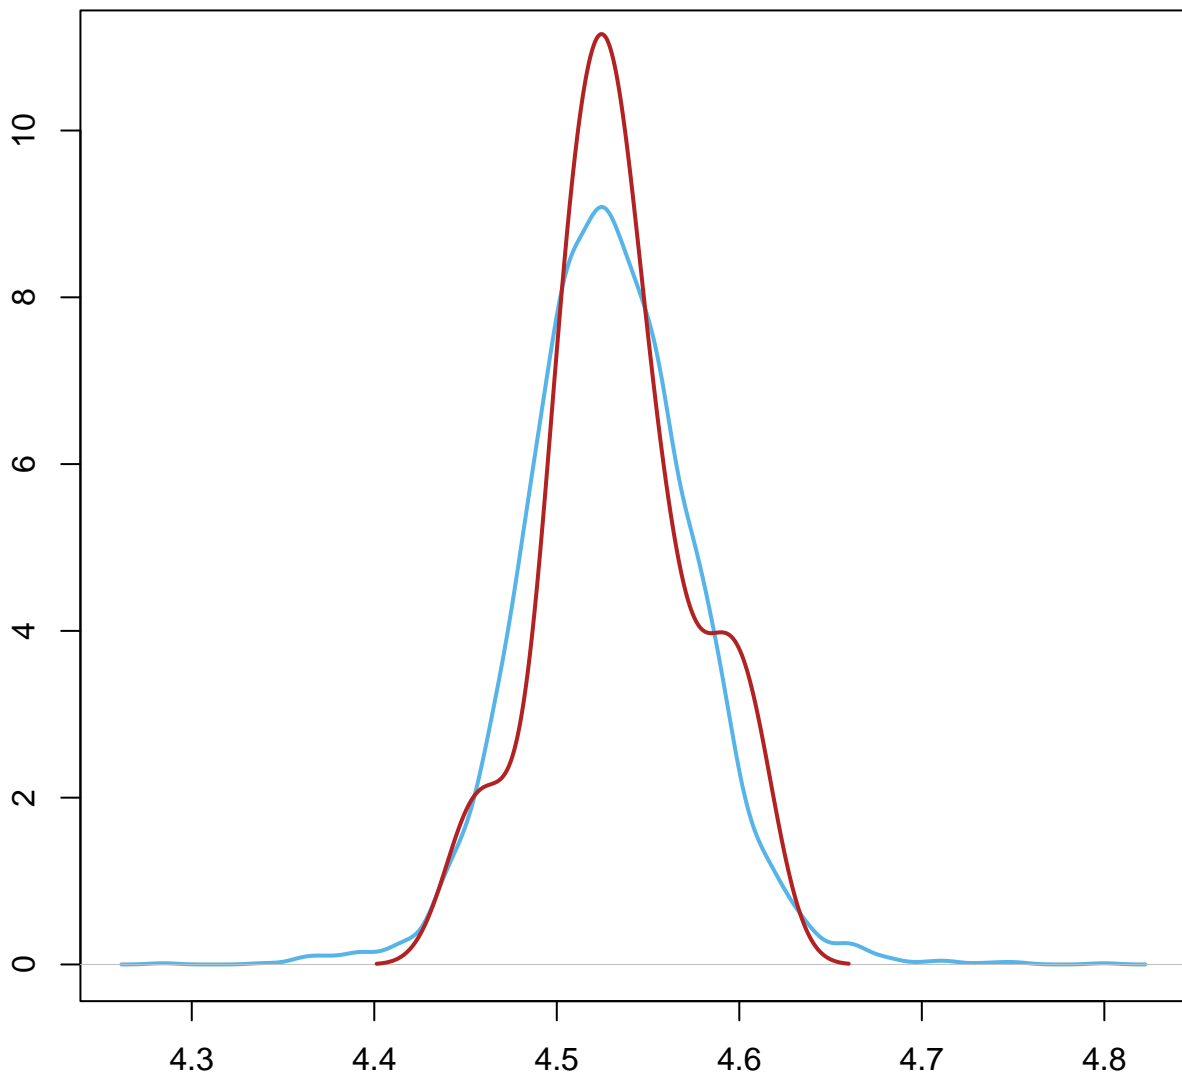

In\_Fe

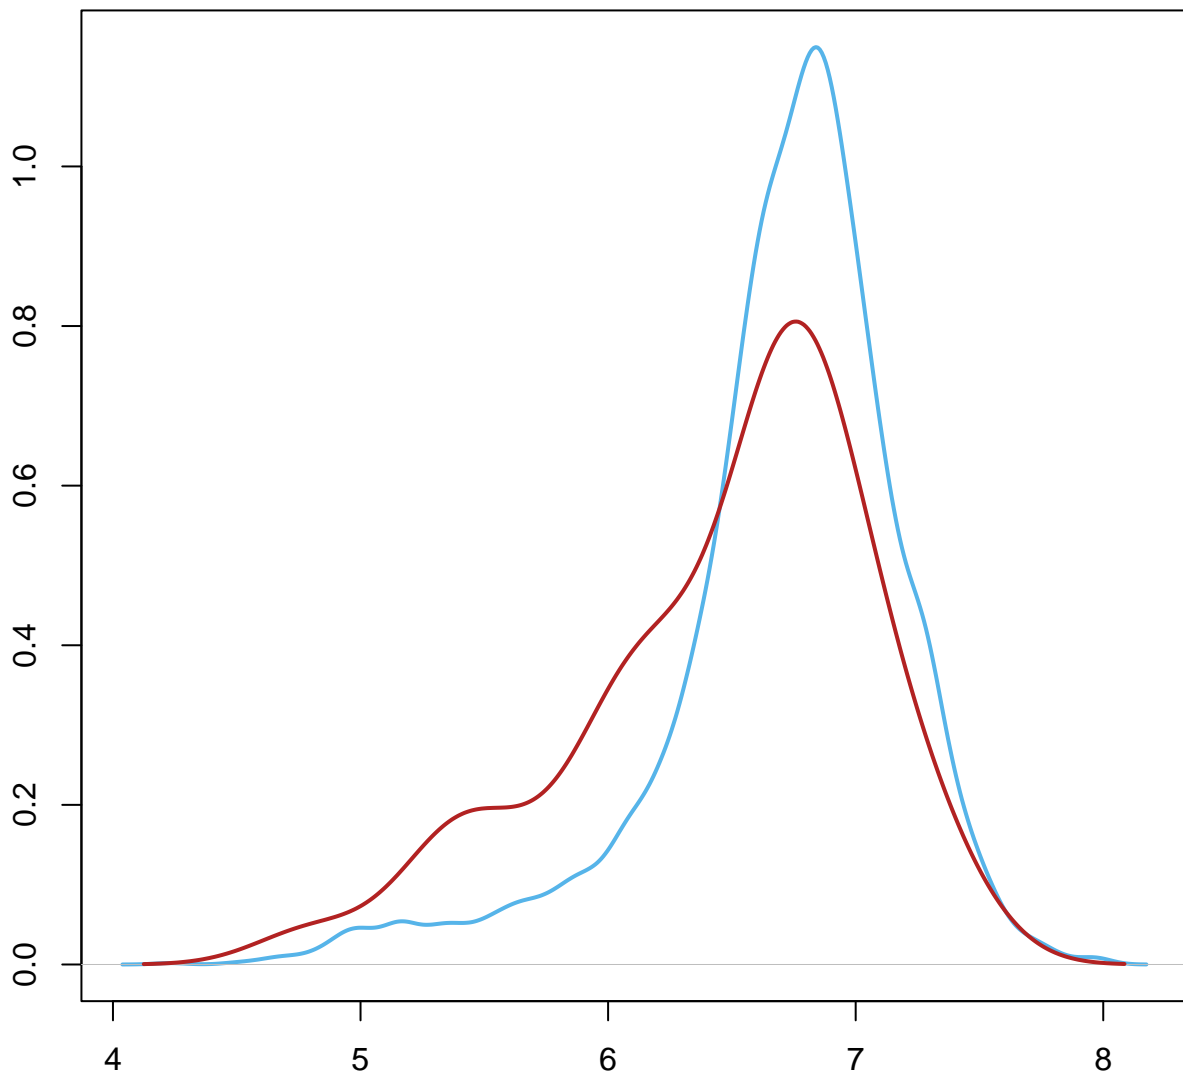

ln\_Co

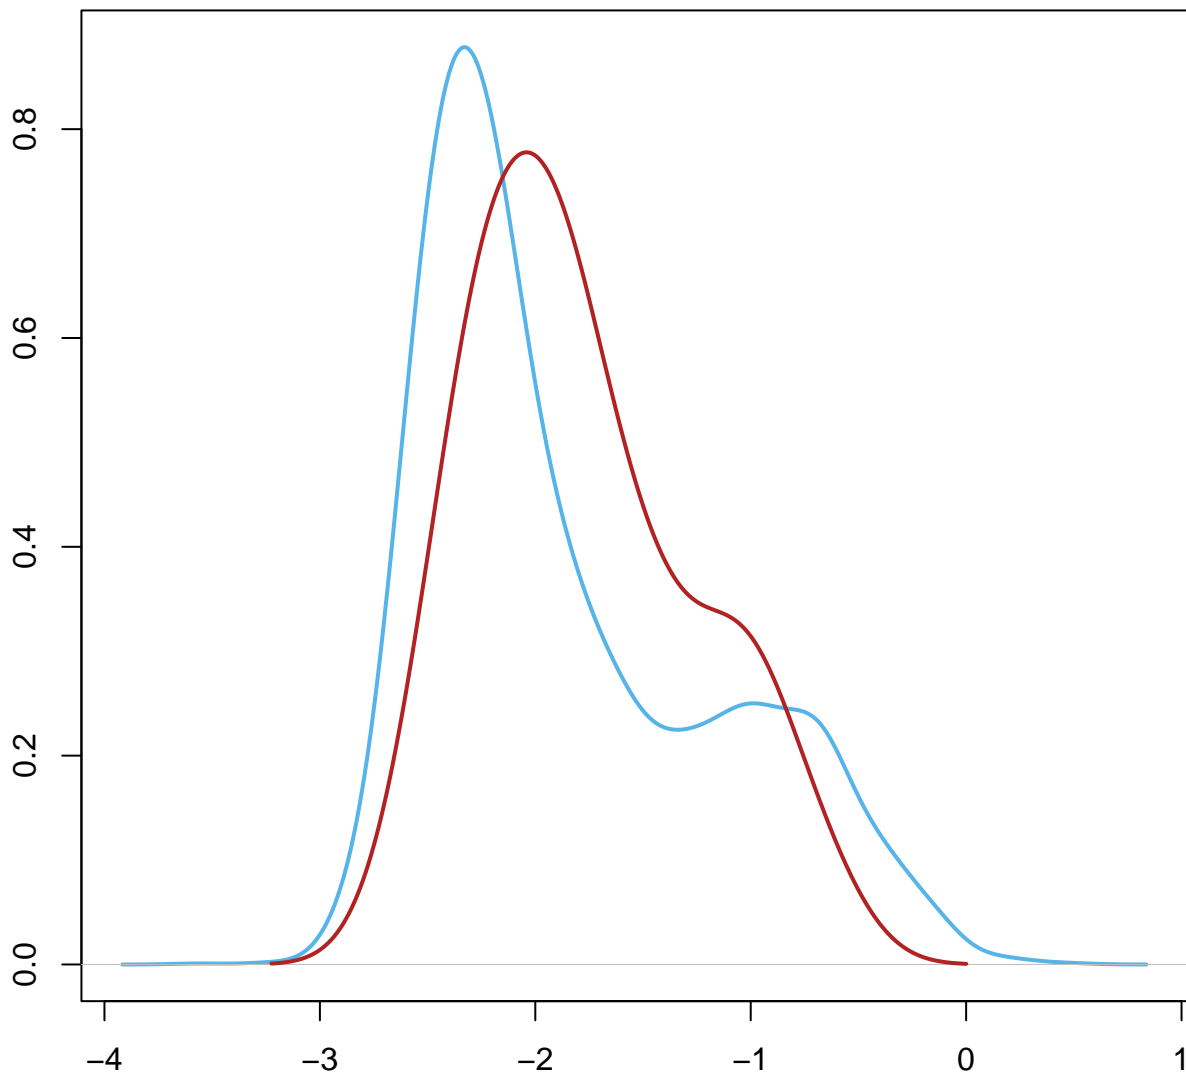



In\_Cu

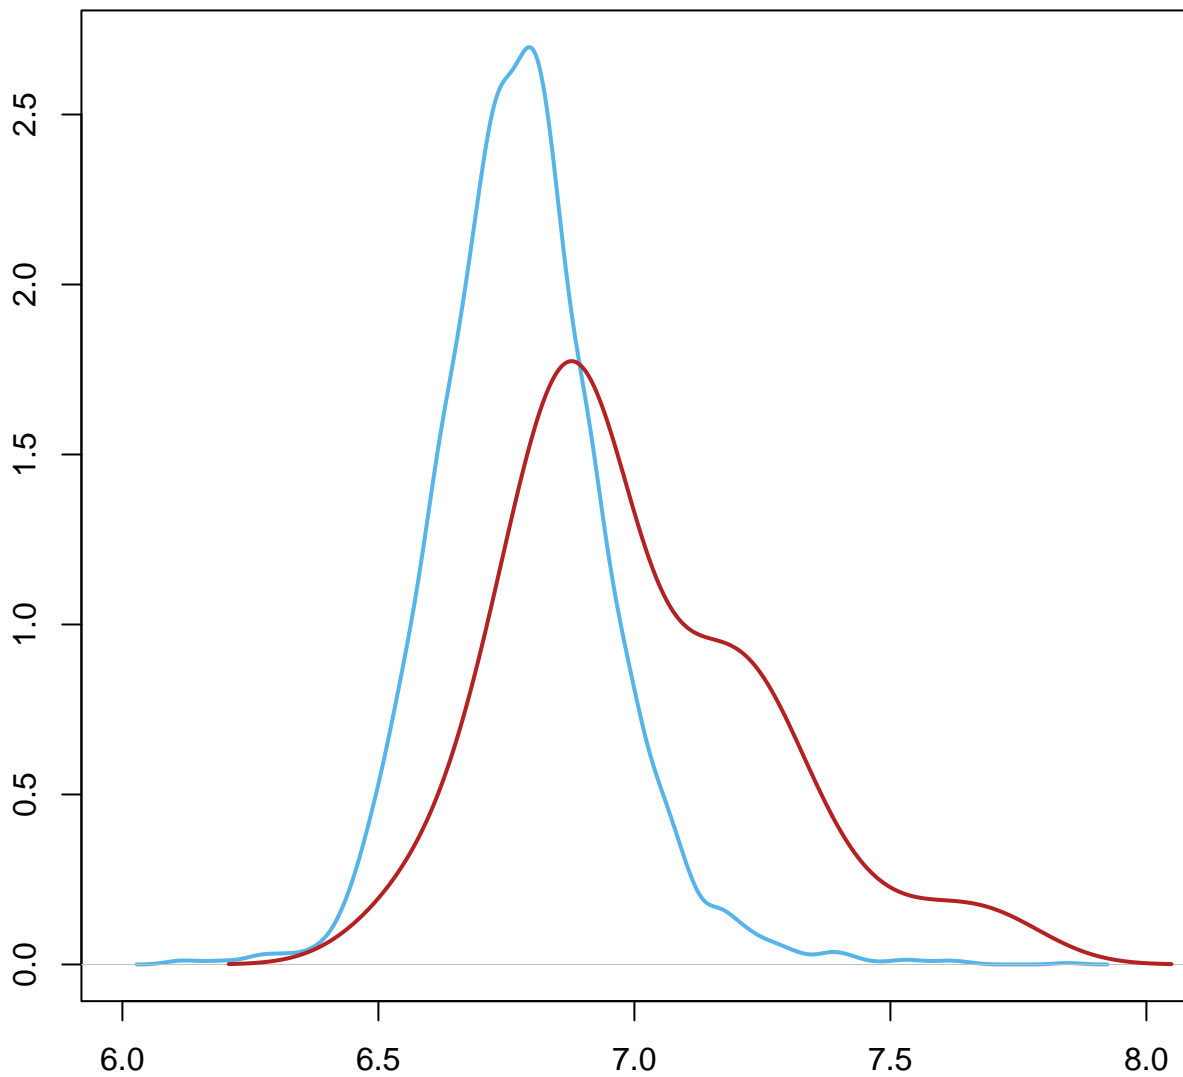

ln\_Zn

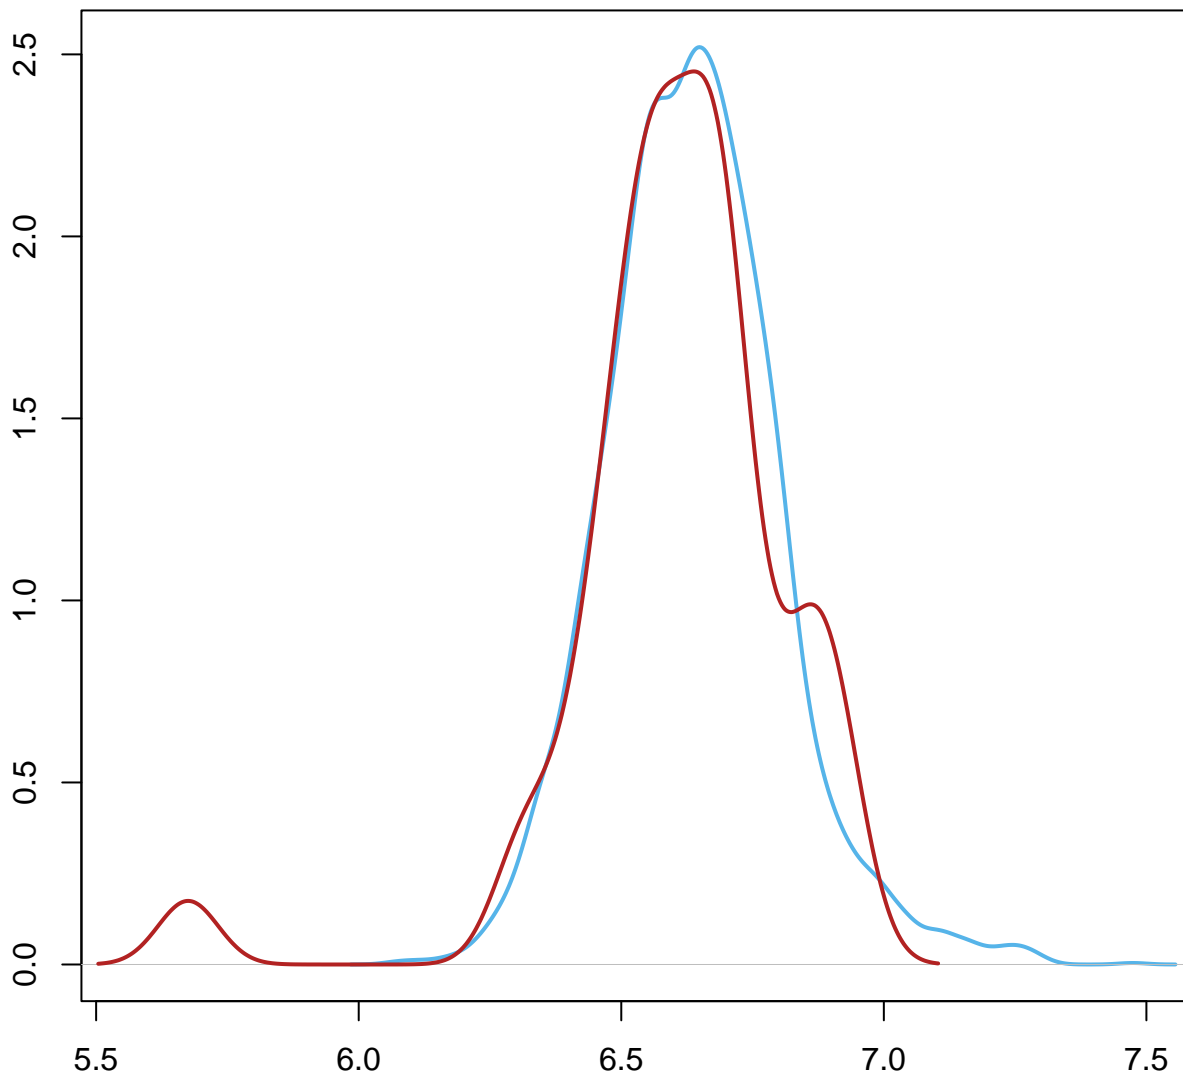

**ln\_As**

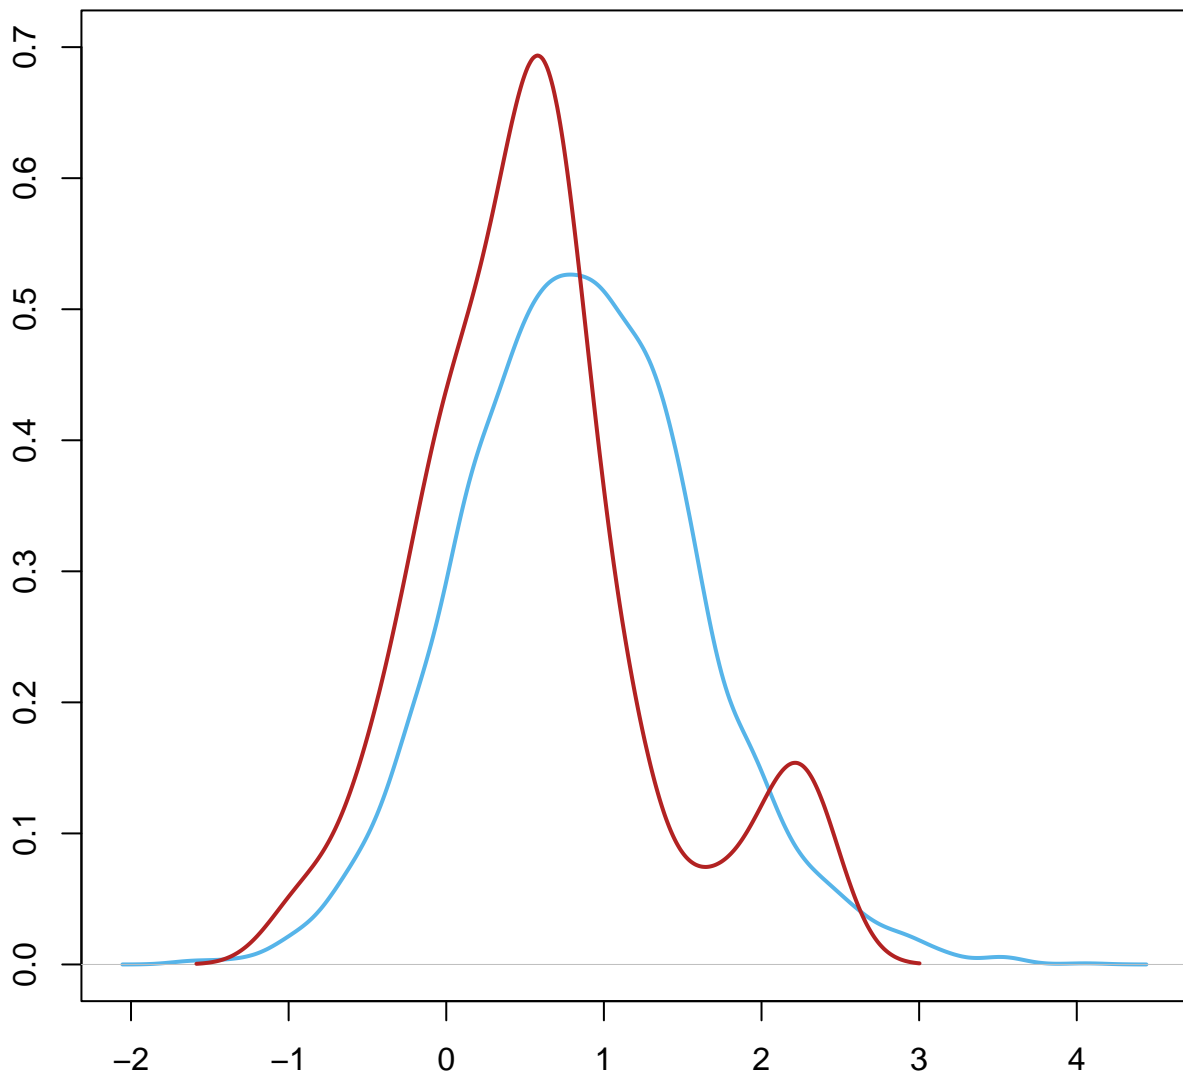

In\_Se

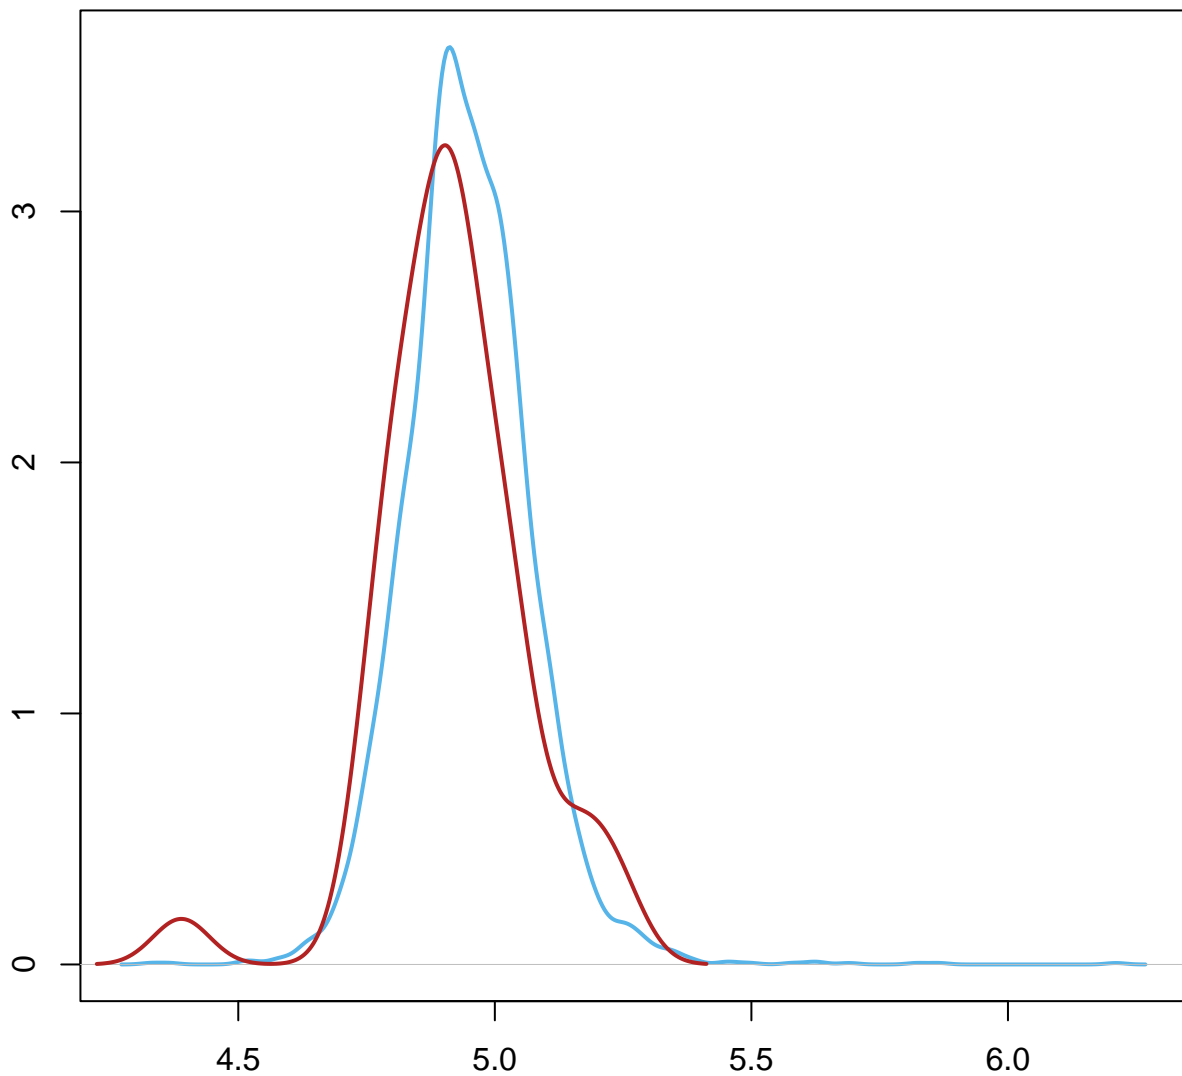

In\_Rb

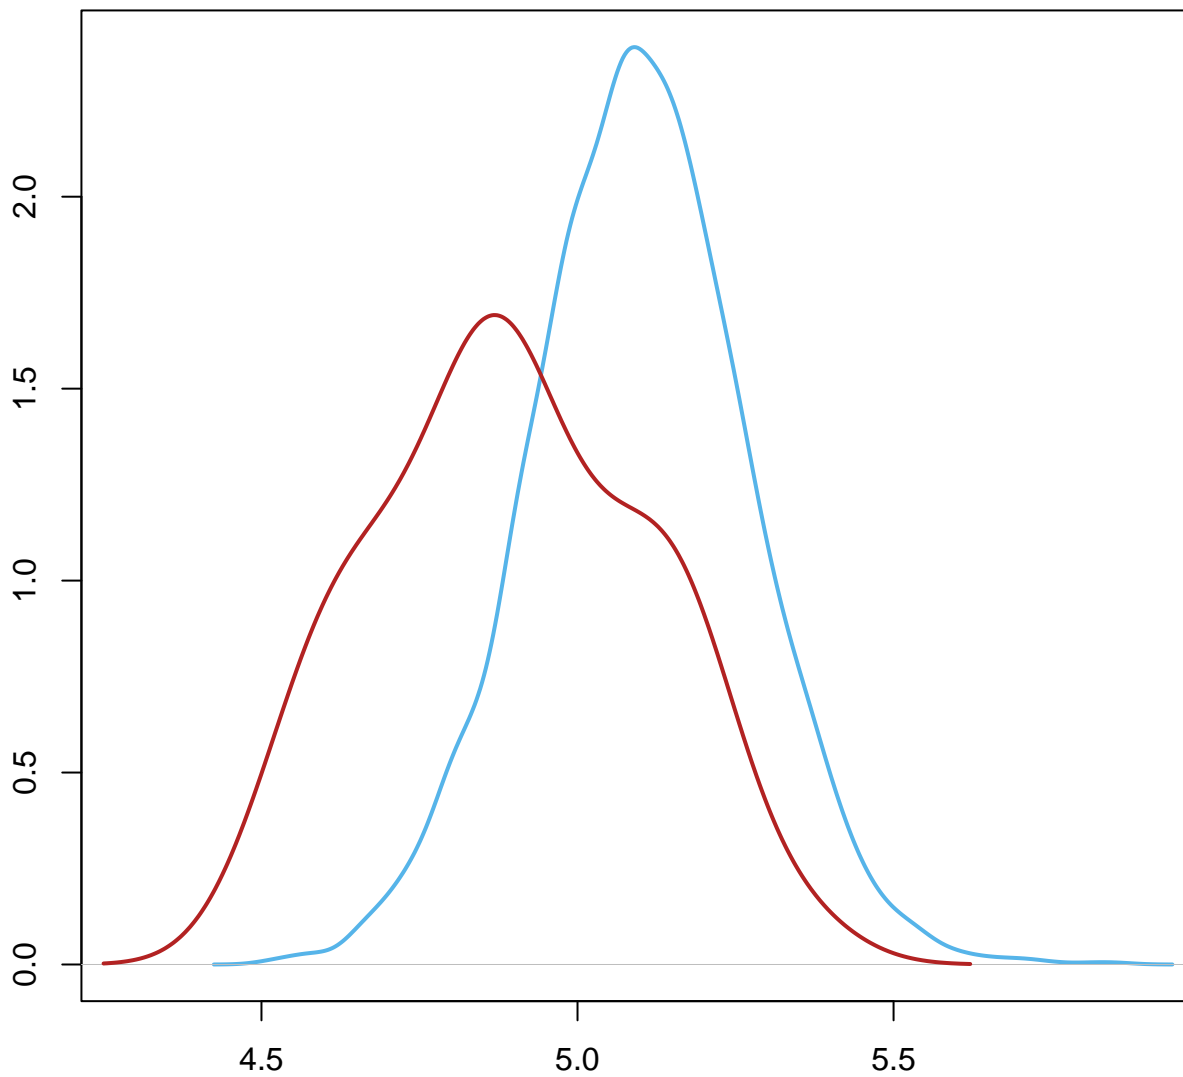

In\_Sr

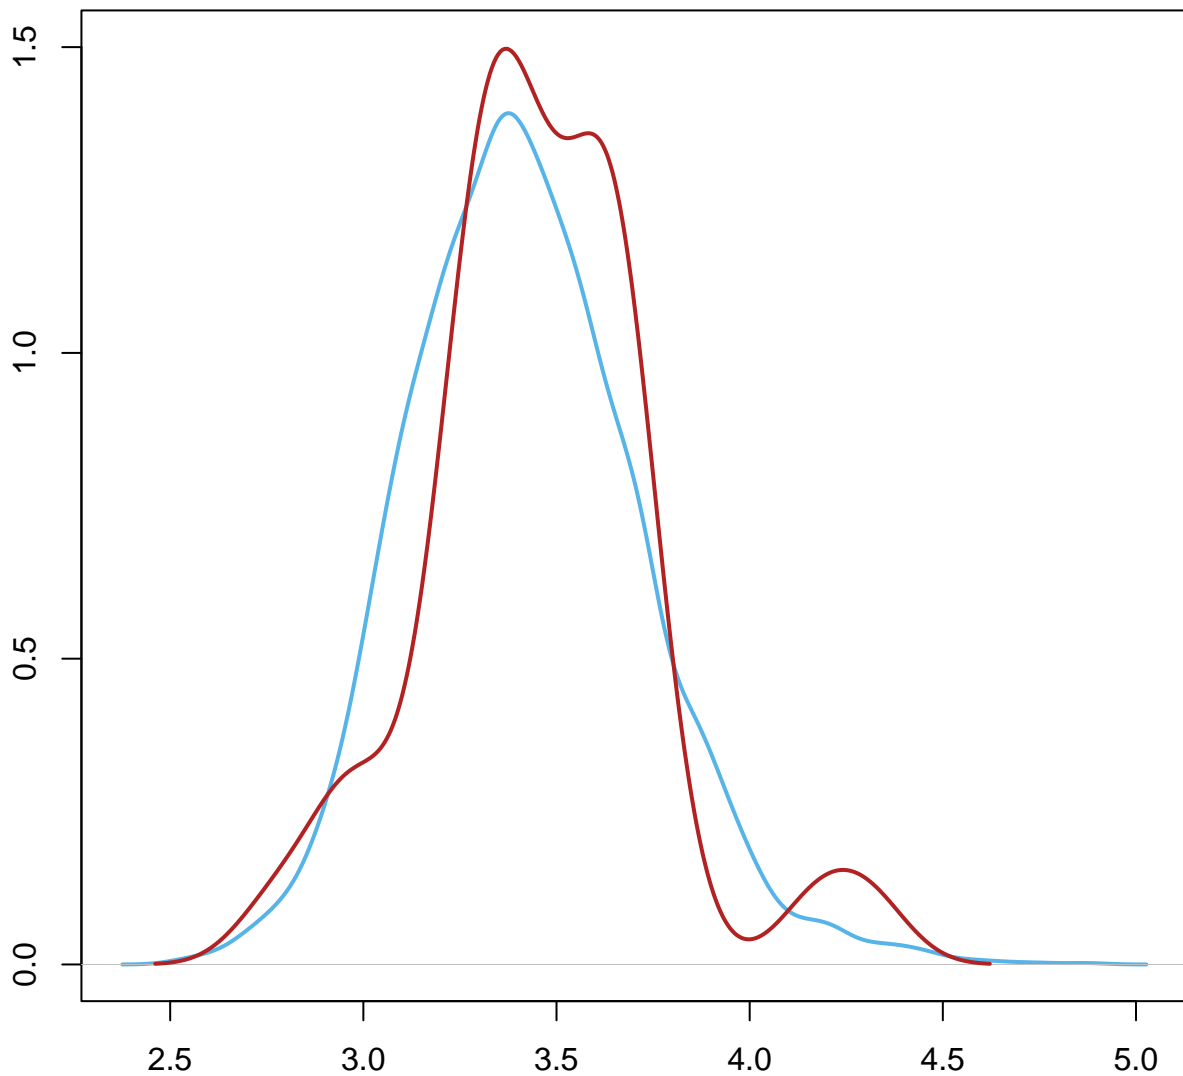

In\_Mo

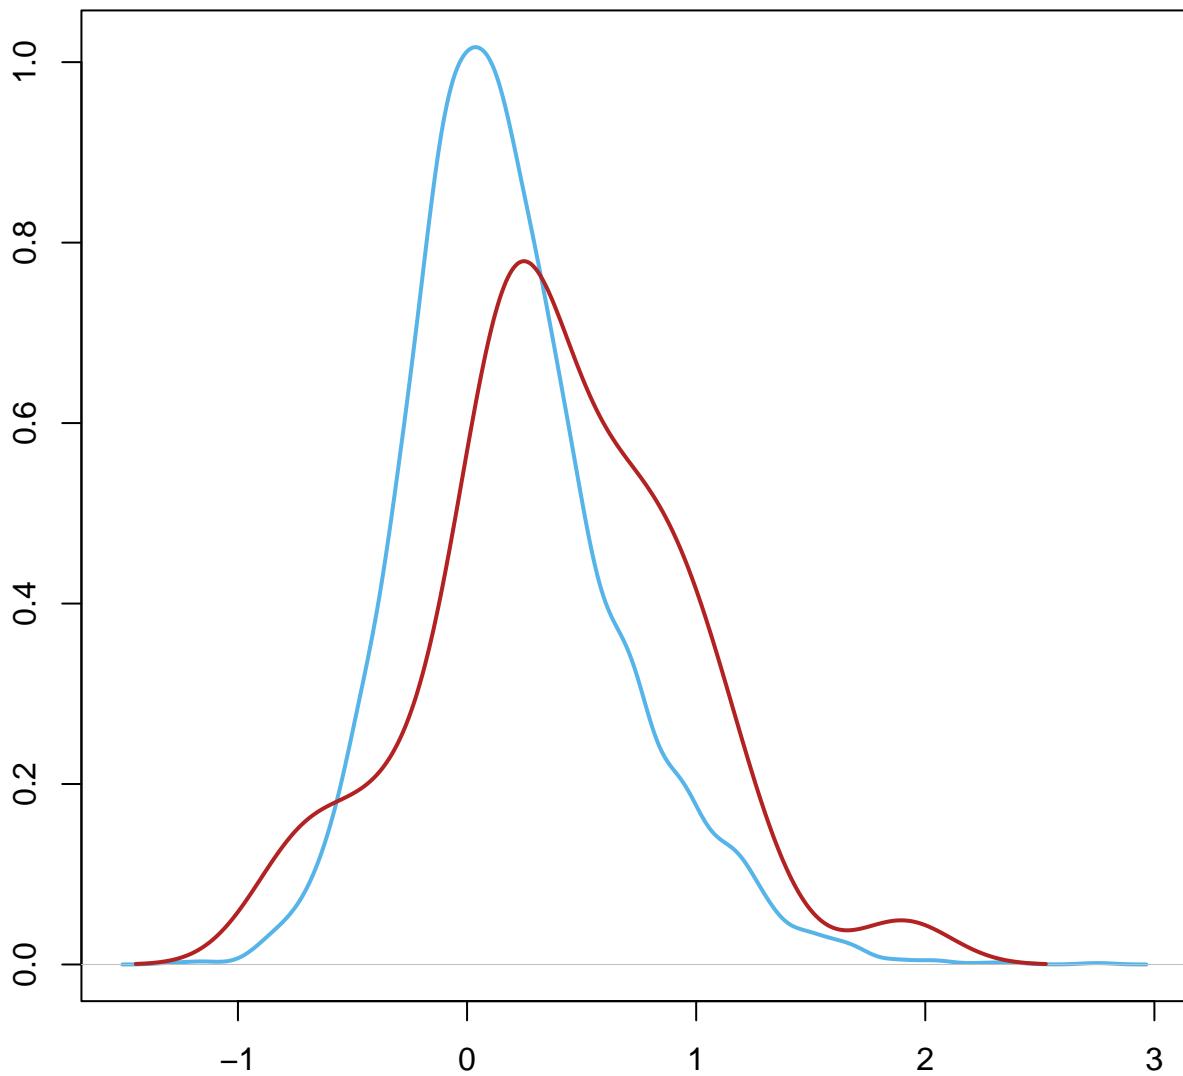

In\_Ag

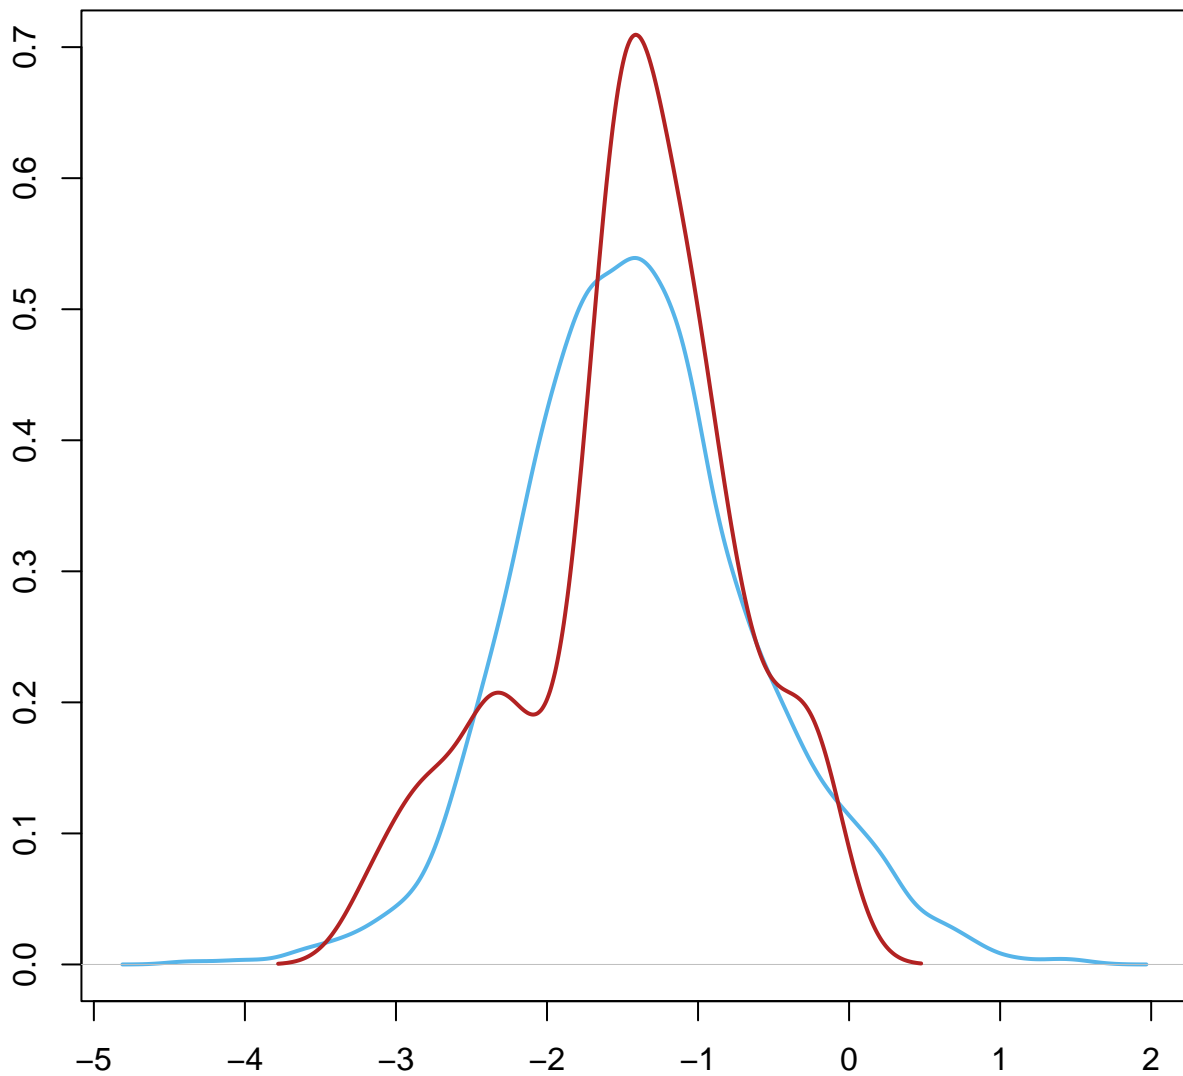



$\ln_{Cs}$

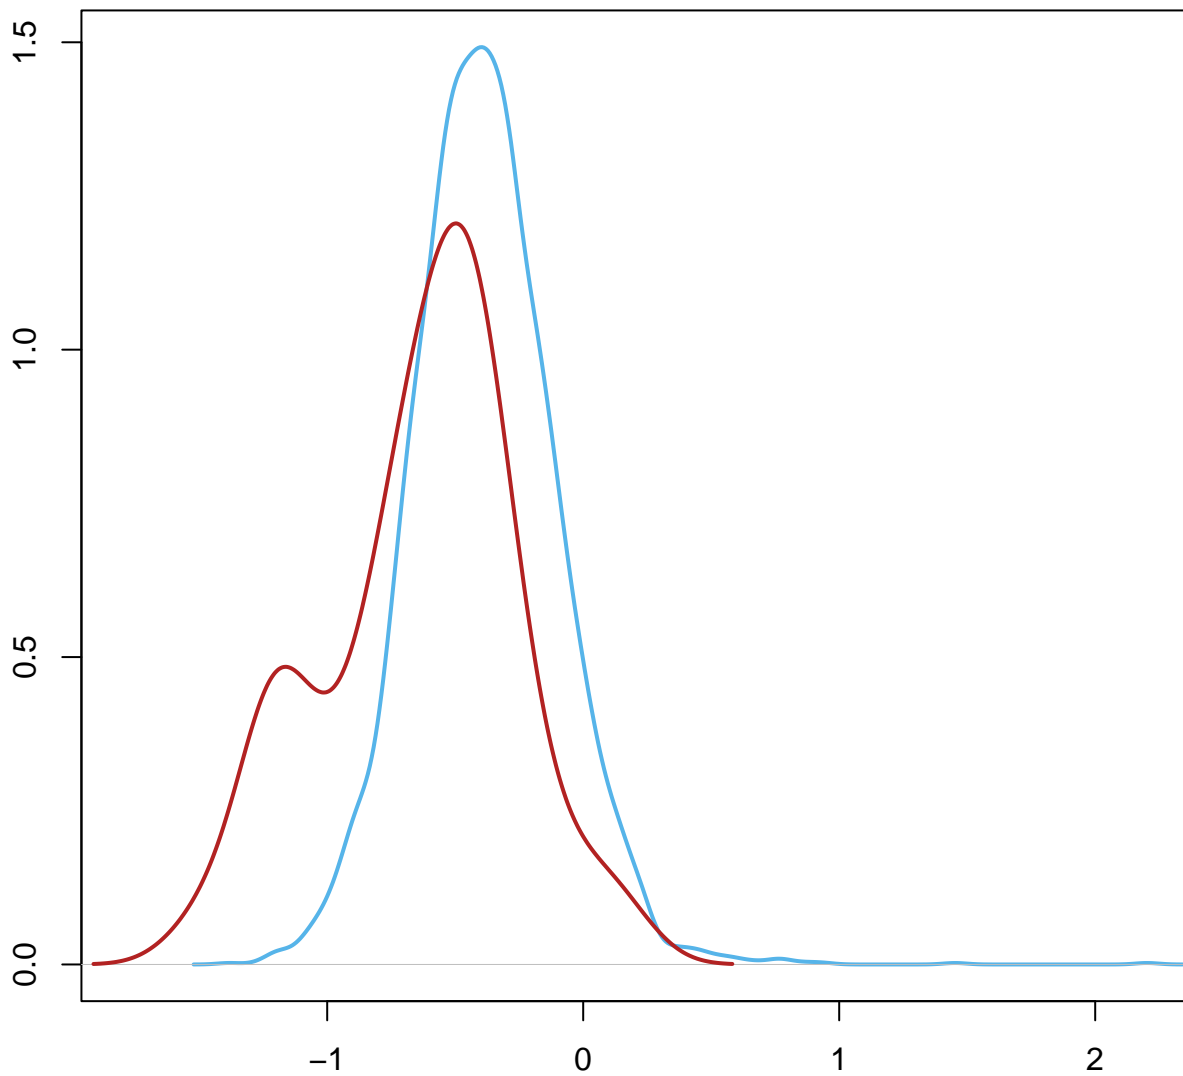

Supplement: Supporting_Figure_1.zip [file Supporting_Figure_1.zip]

In\_Na

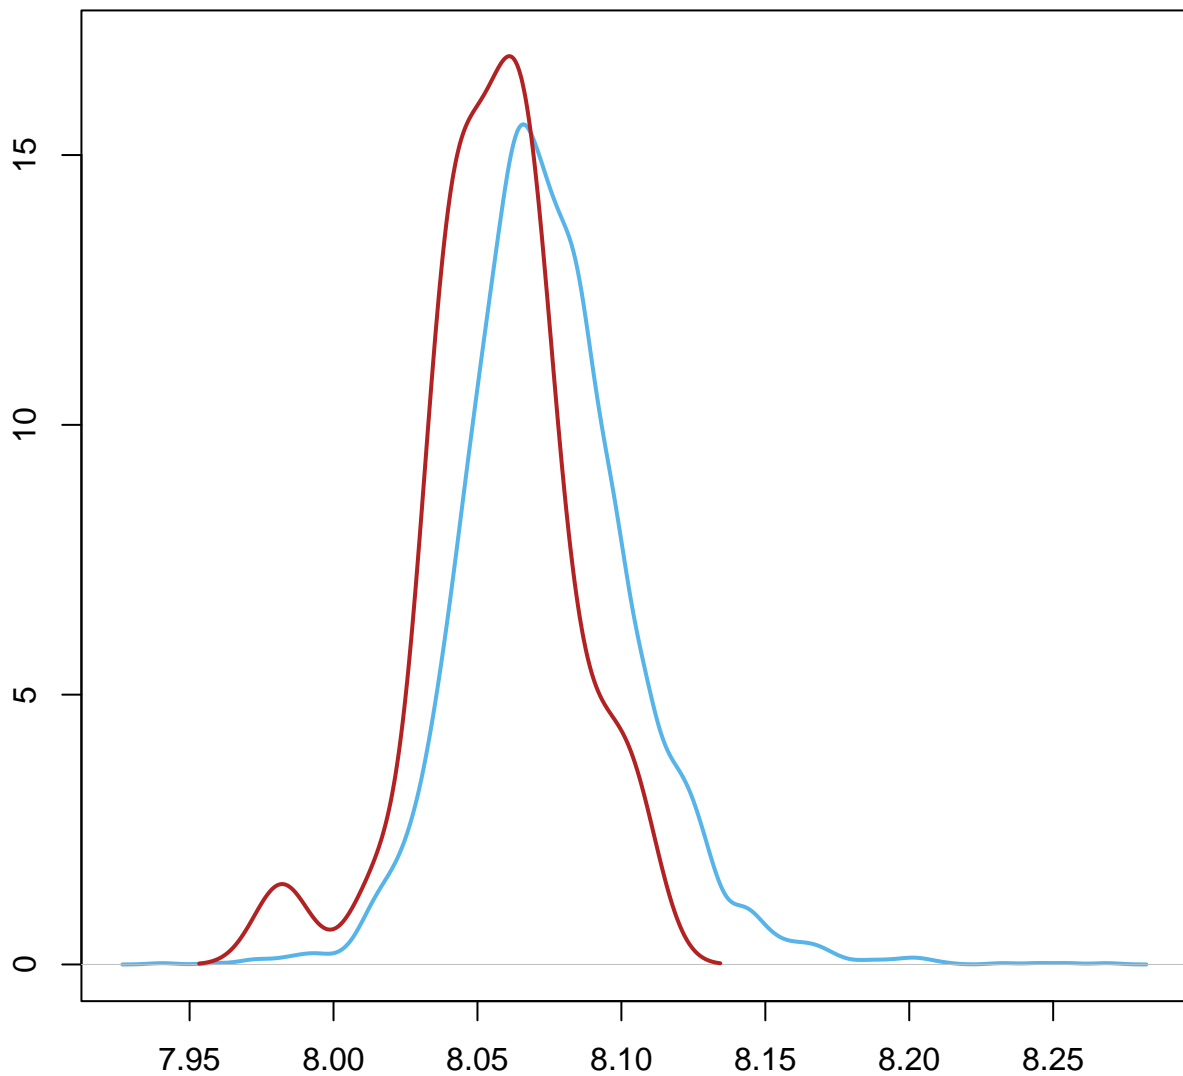

ln\_Mg

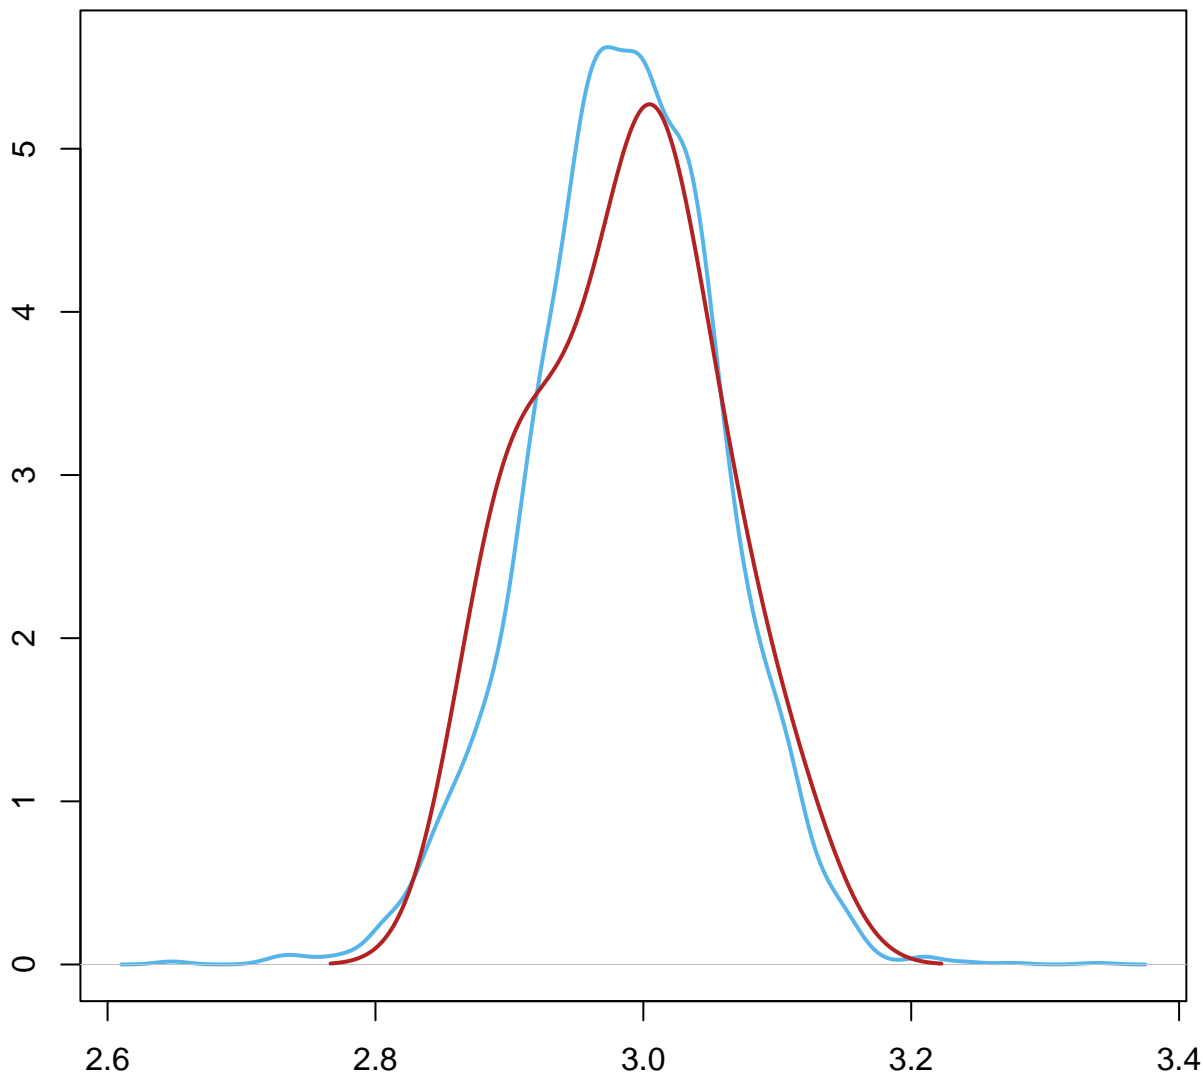

ln\_P

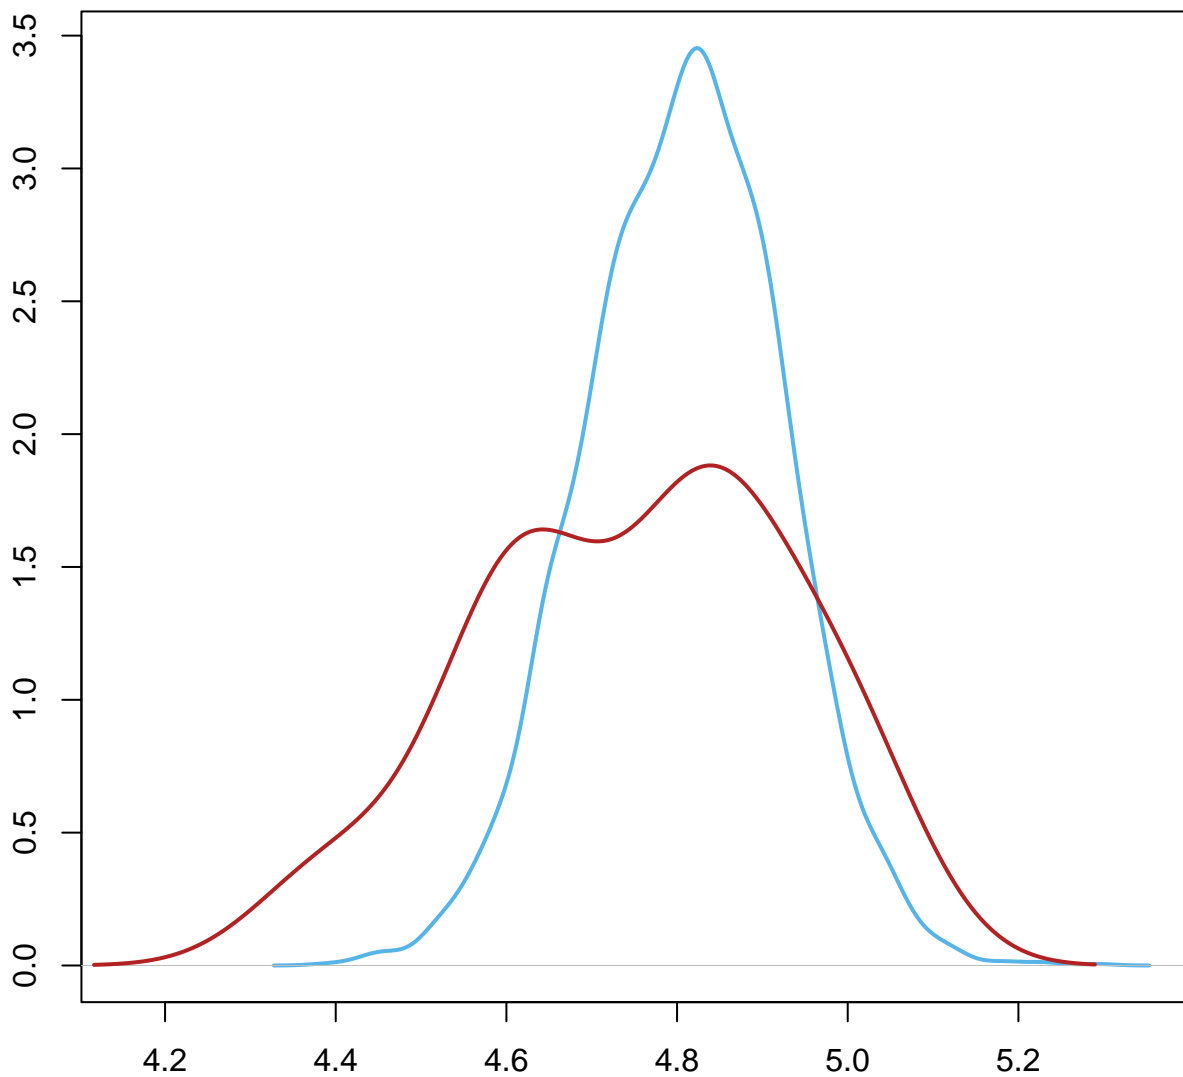

ln\_S

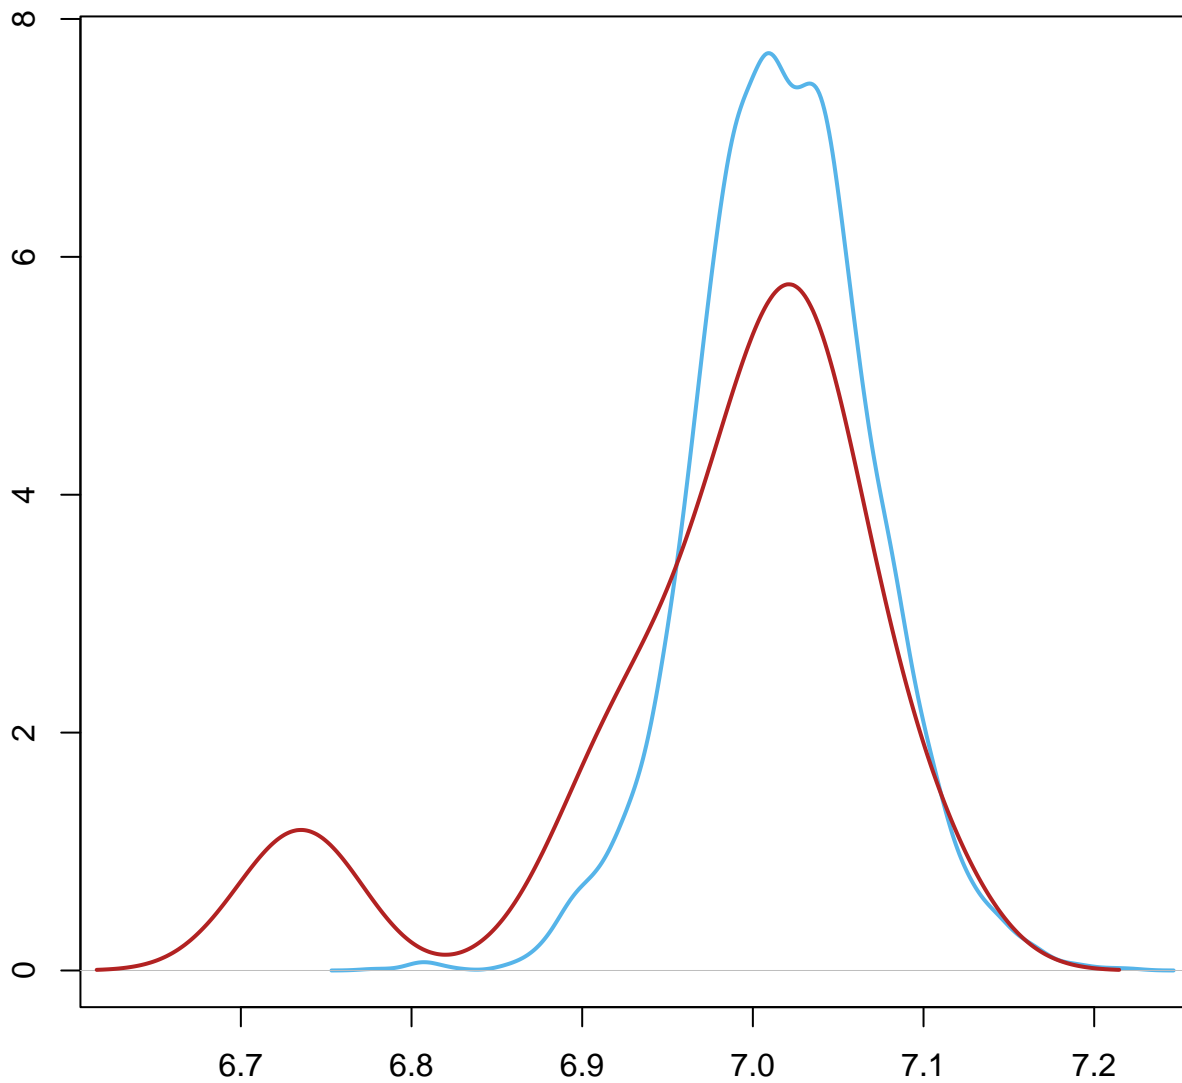

ln\_K

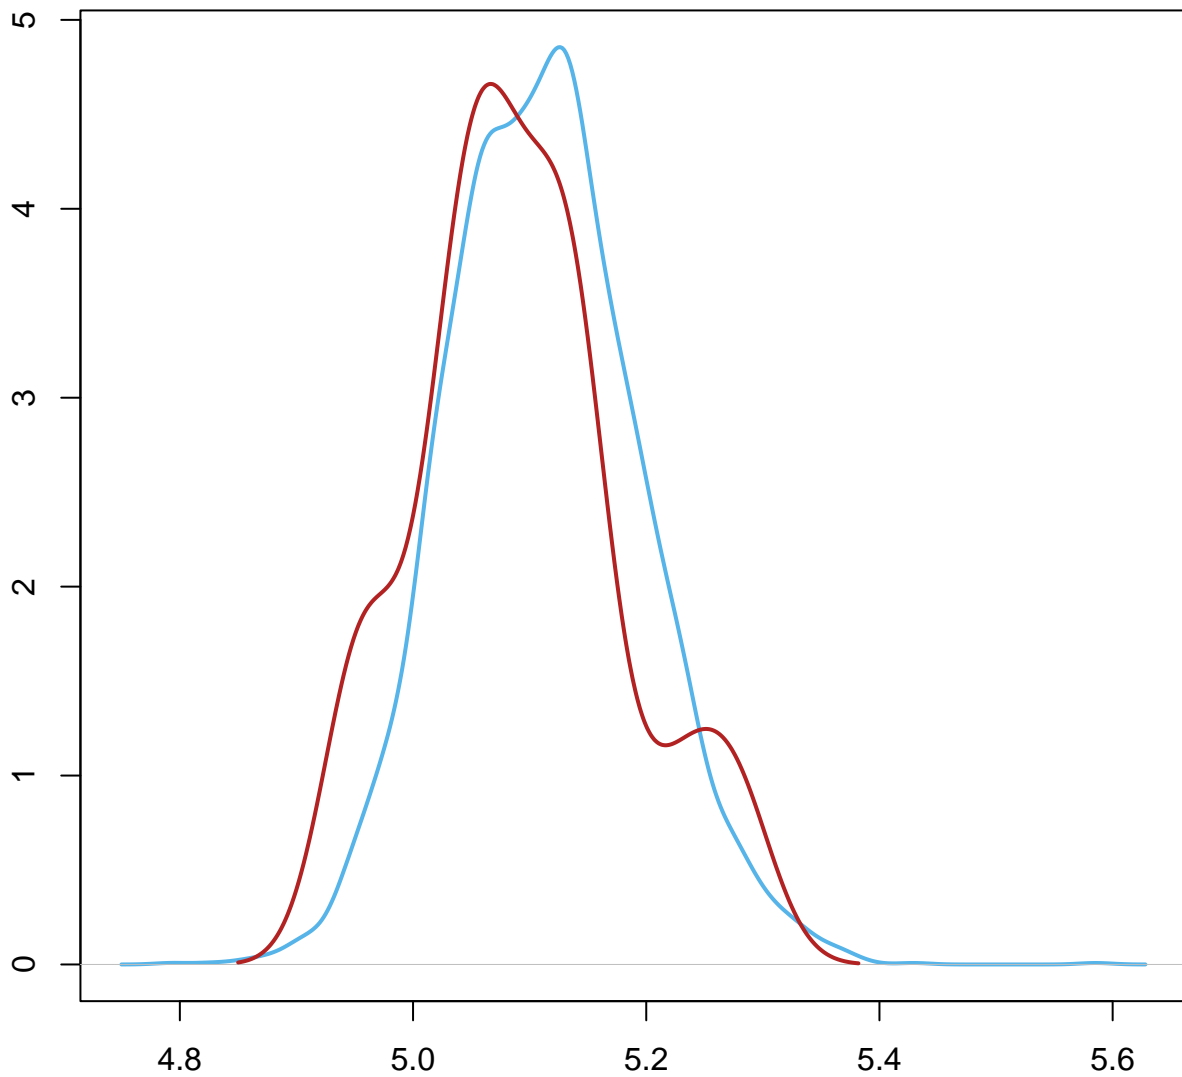

In\_Ca

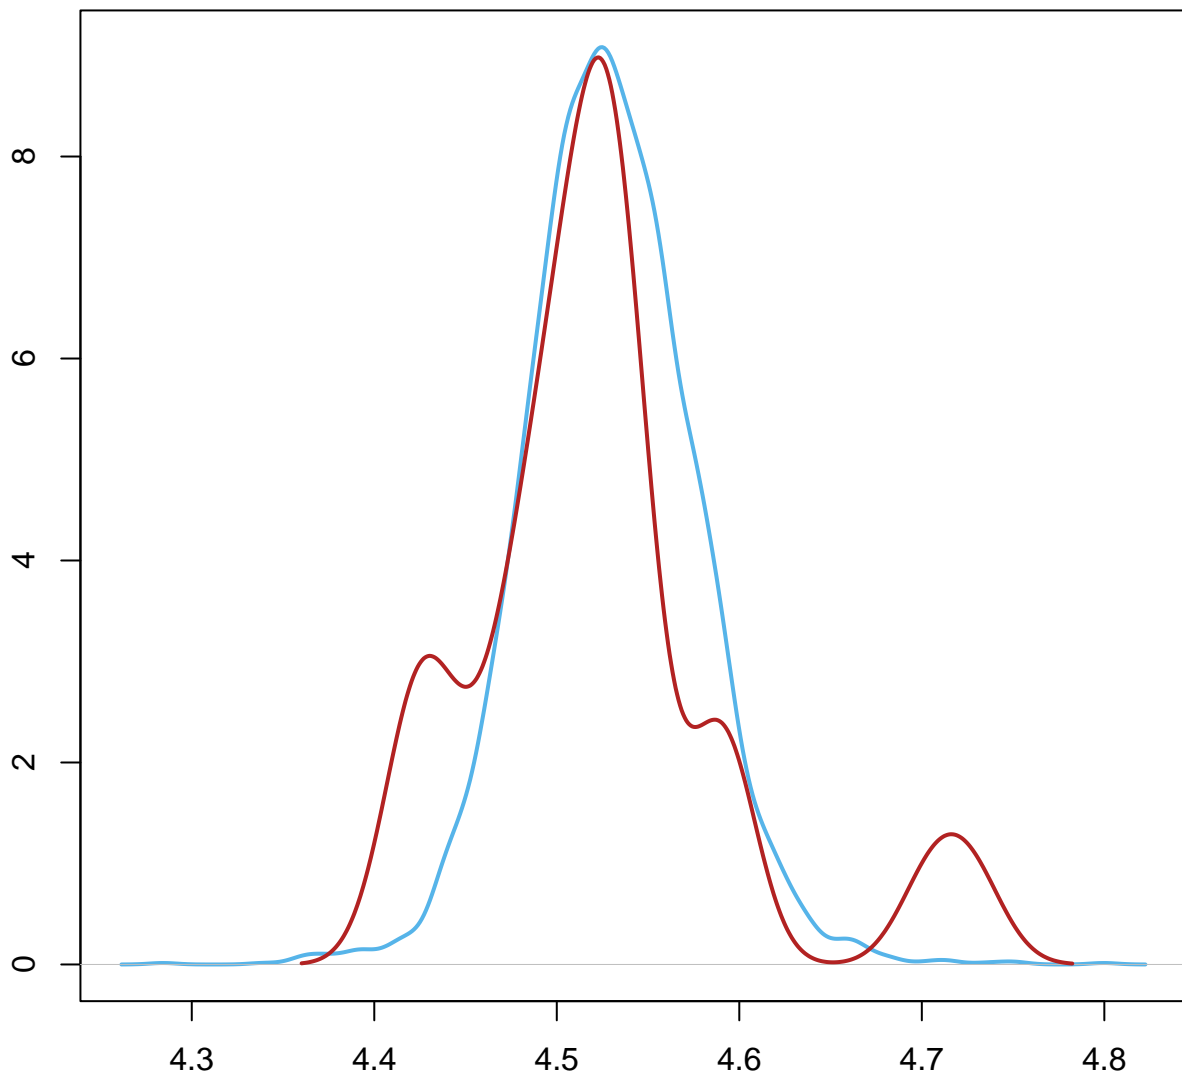

In\_Fe

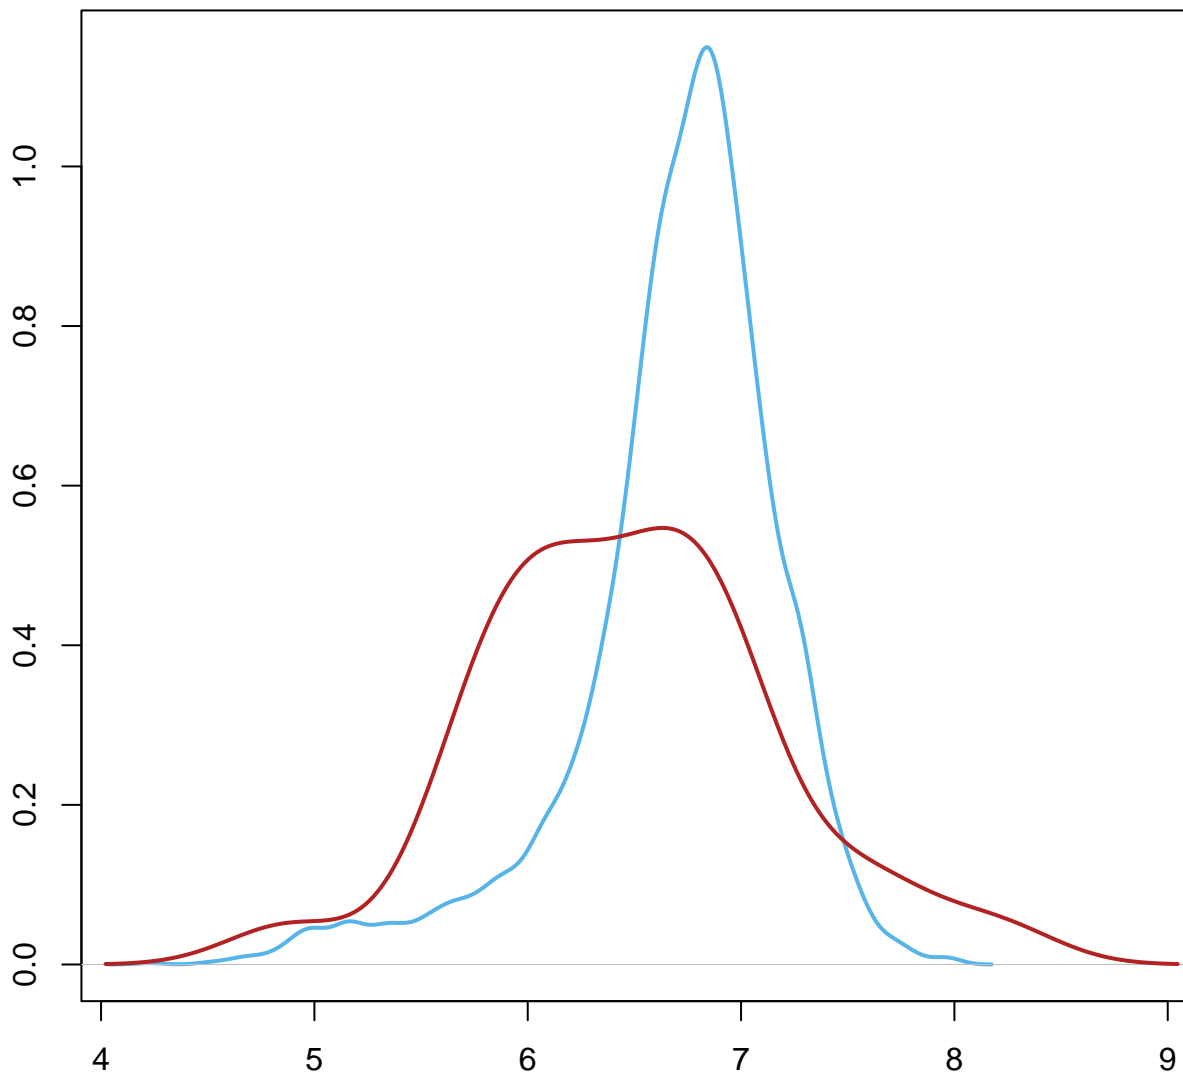

ln\_Co

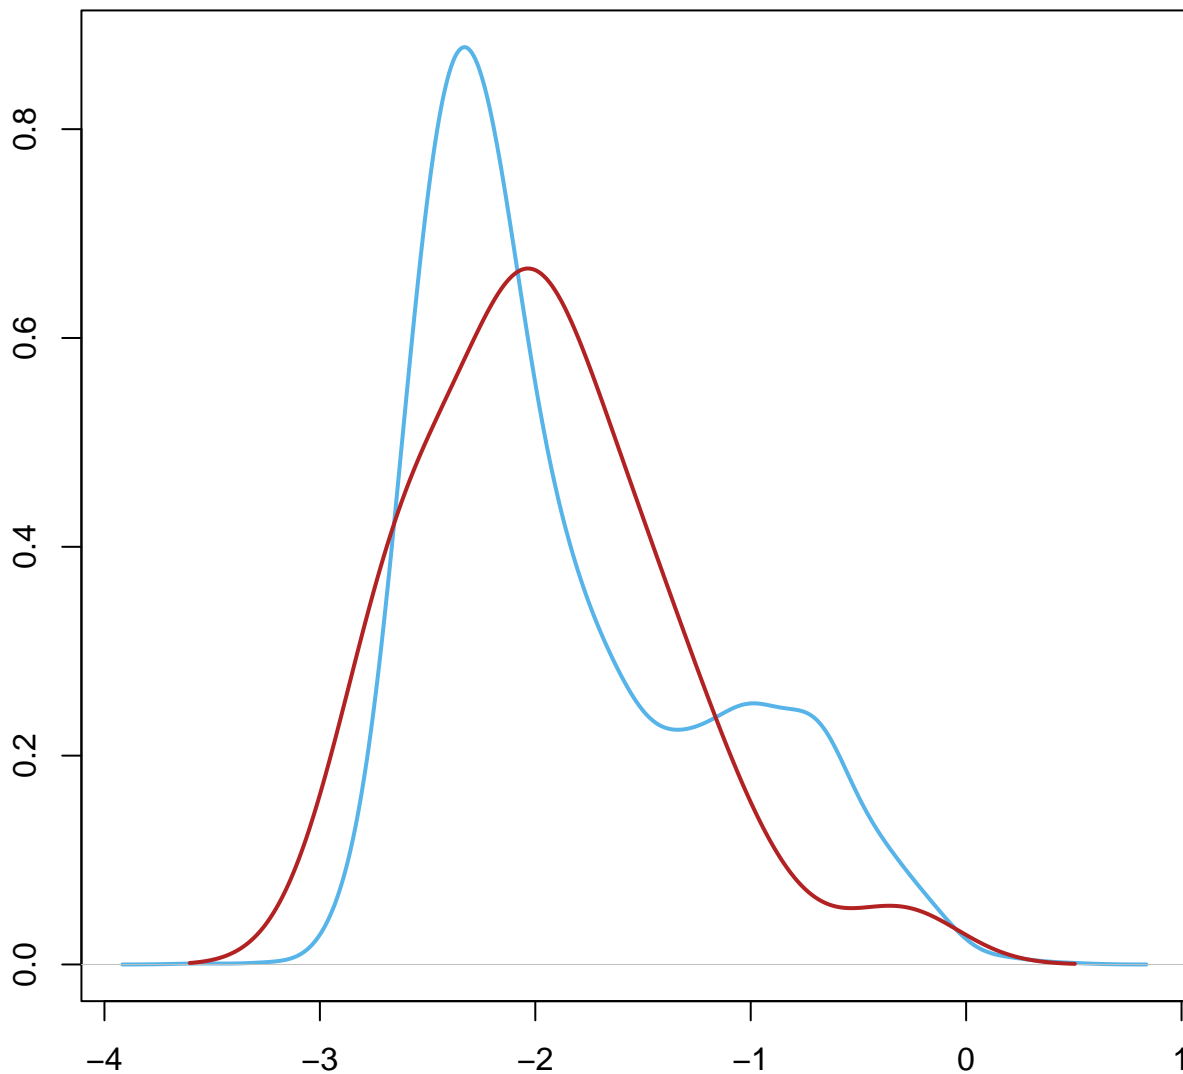



In\_Cu

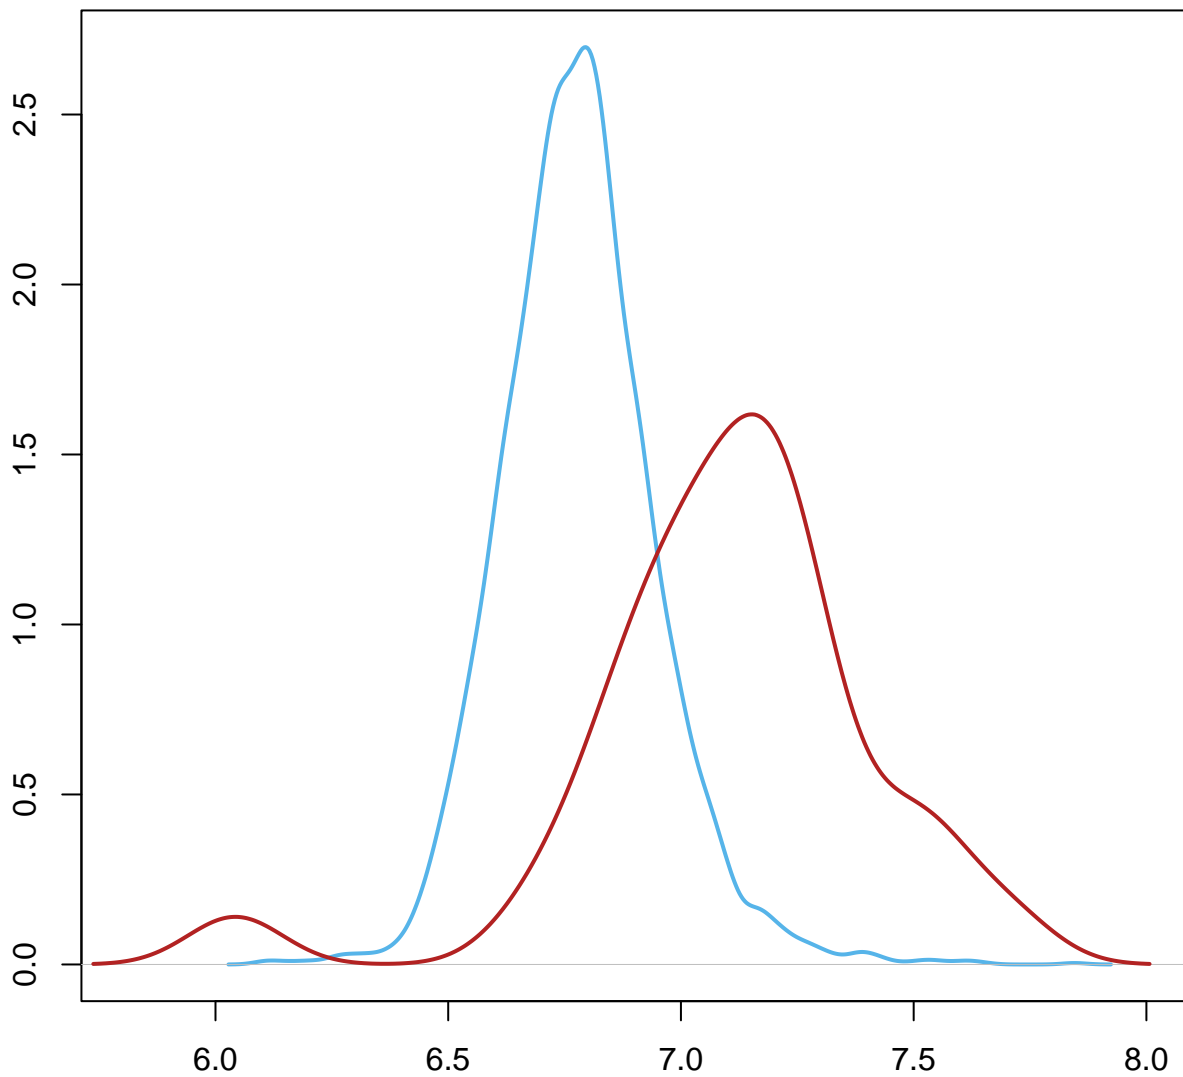

ln\_Zn

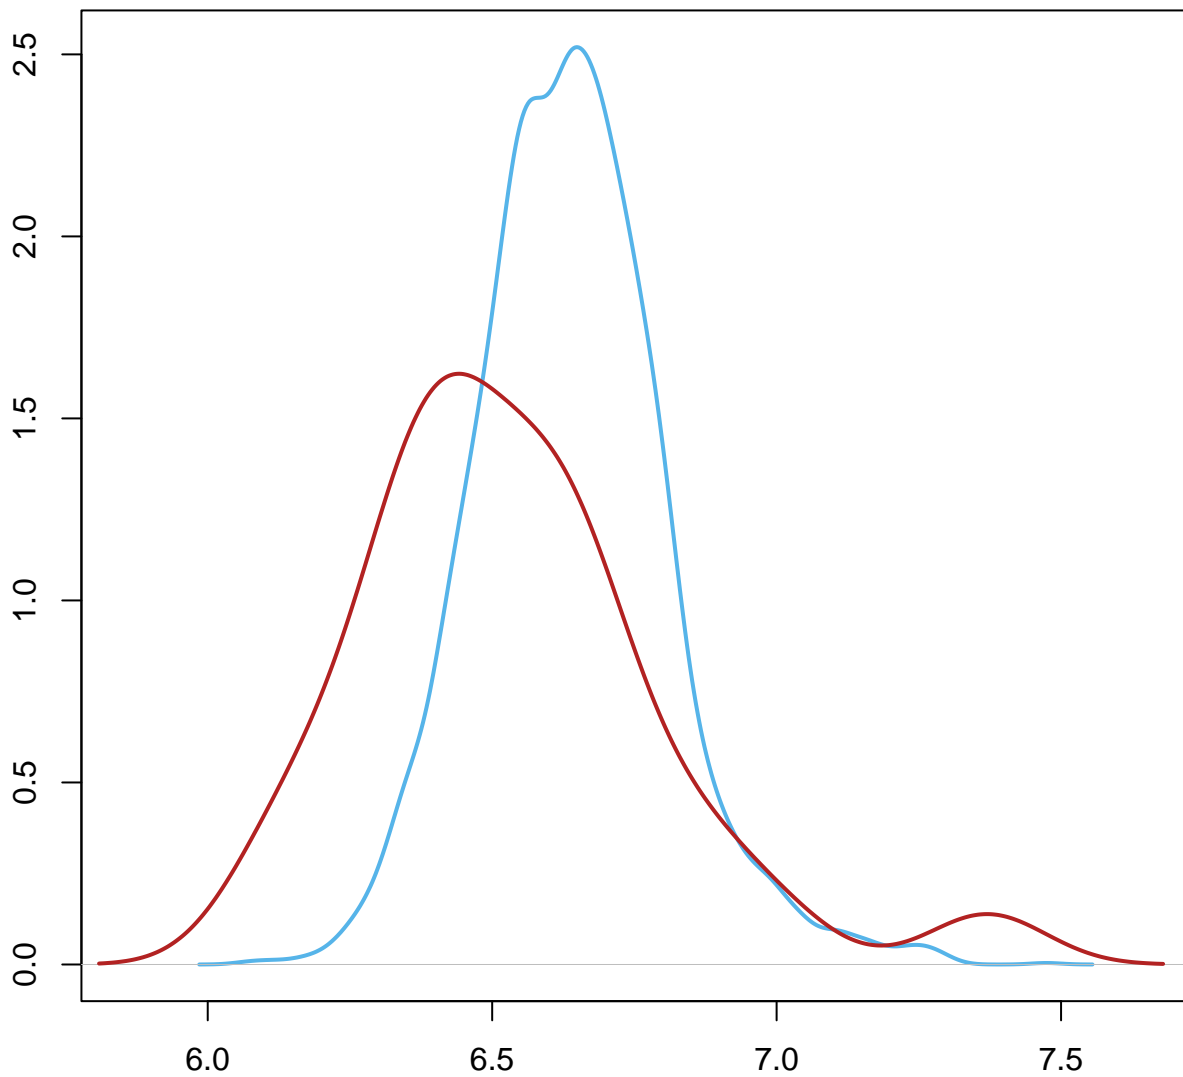

ln\_As

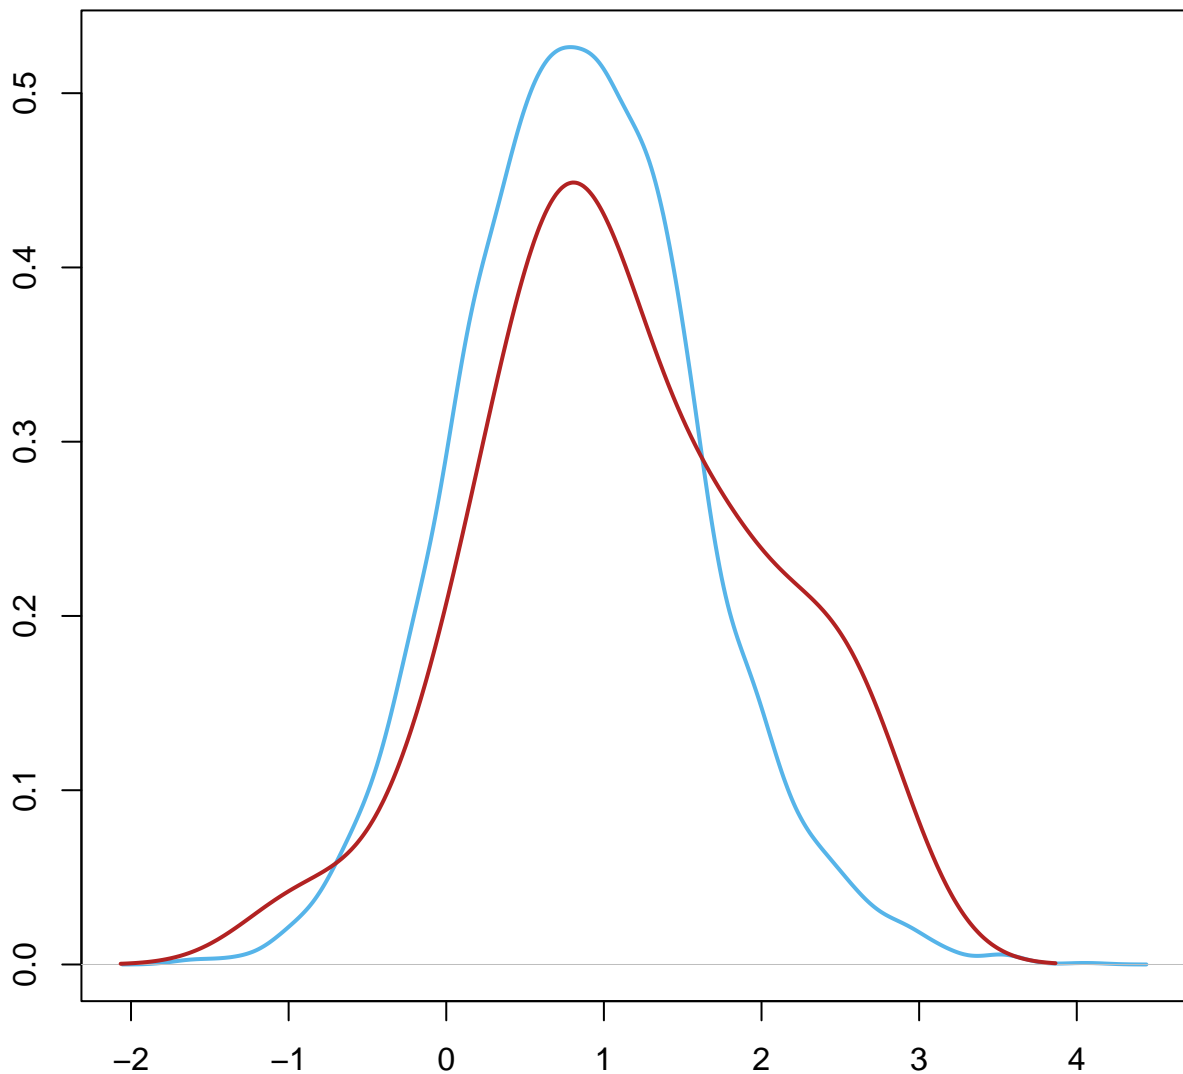

In\_Se

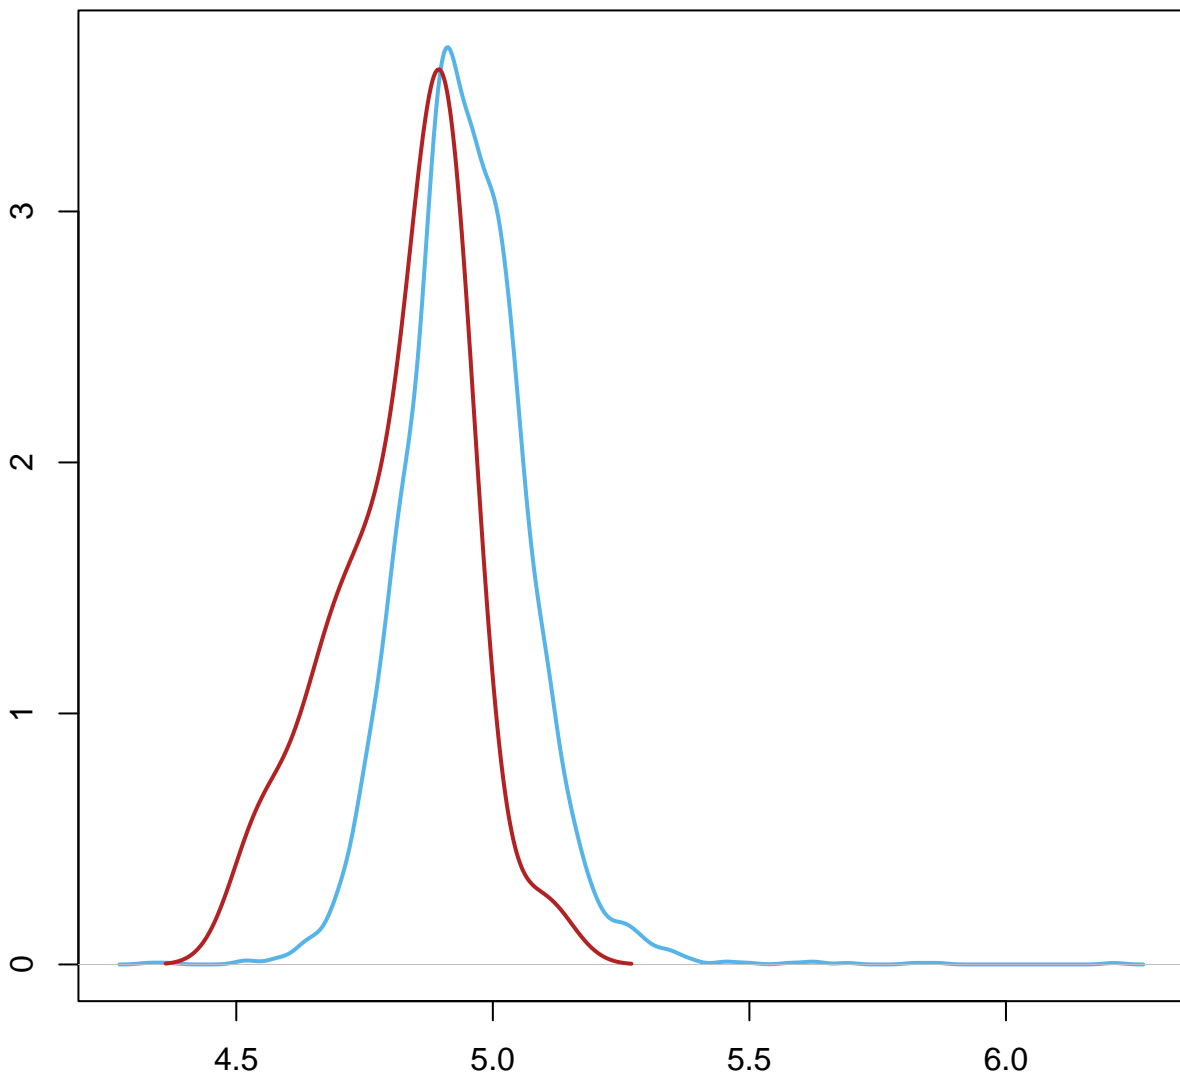

**ln\_Rb**

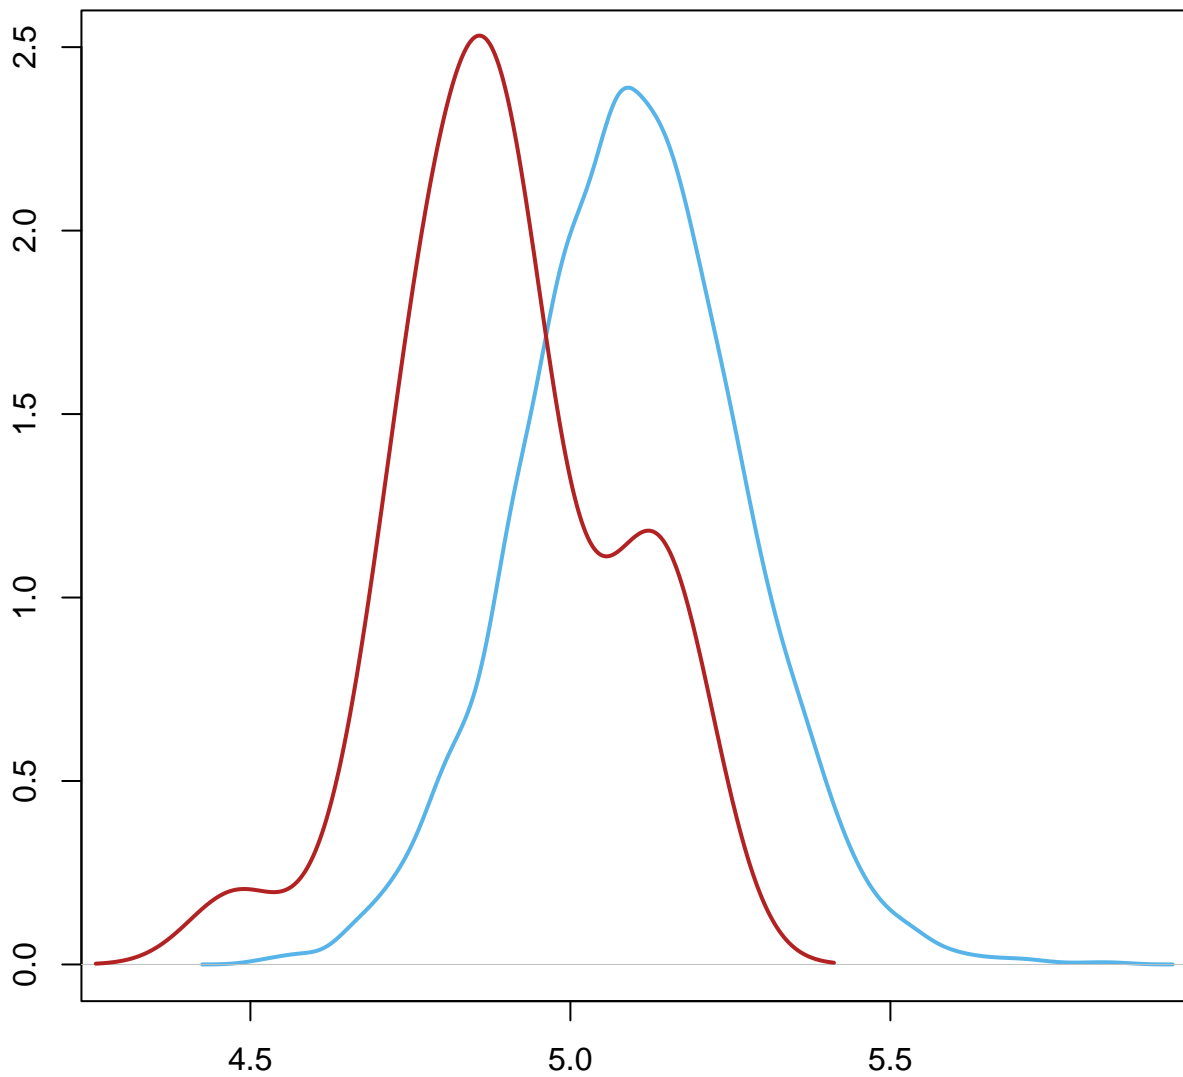

In\_Sr

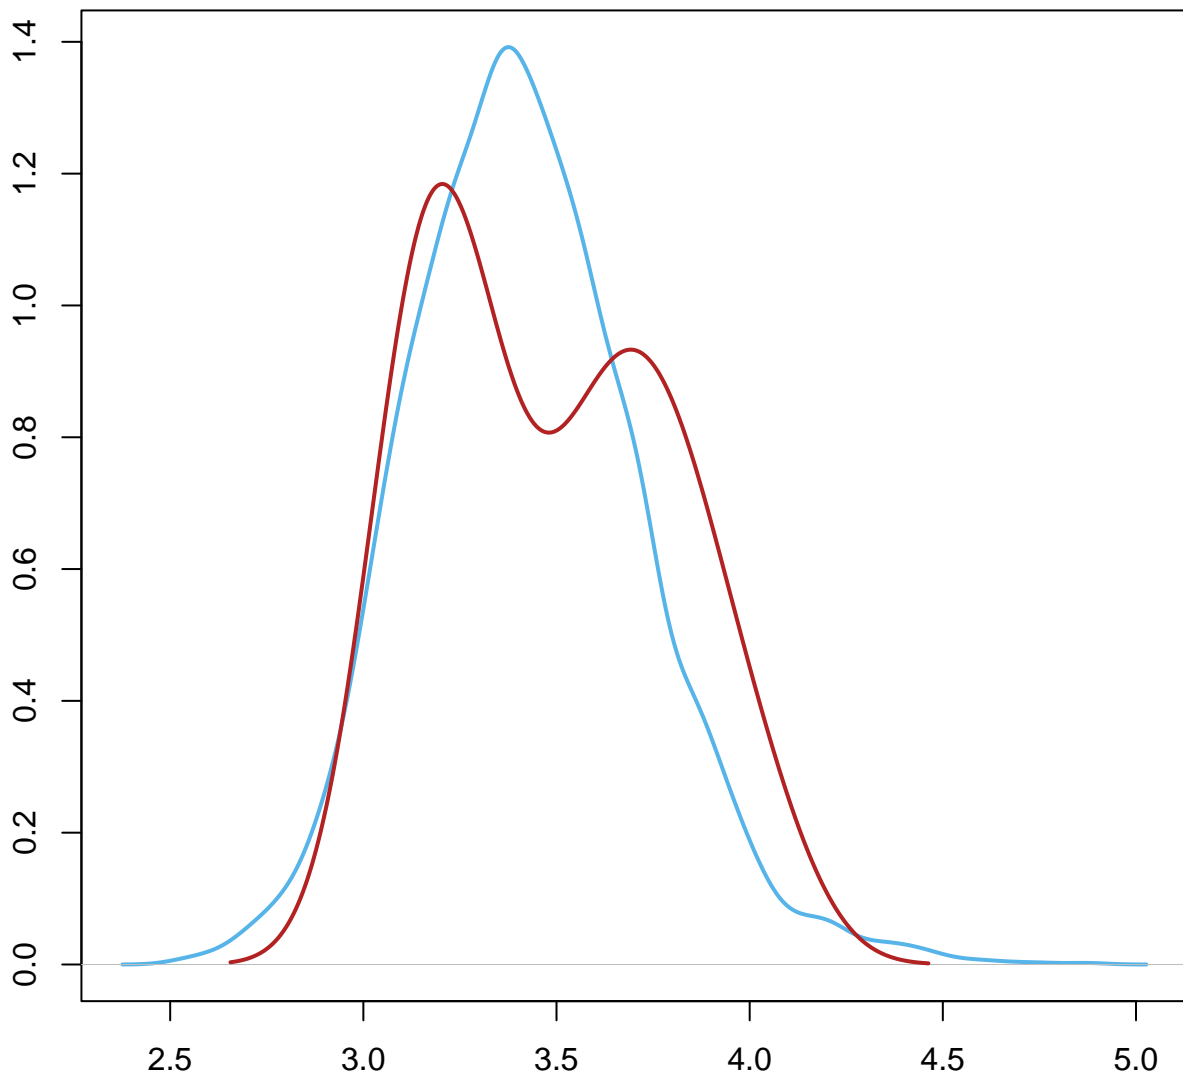

In\_Mo

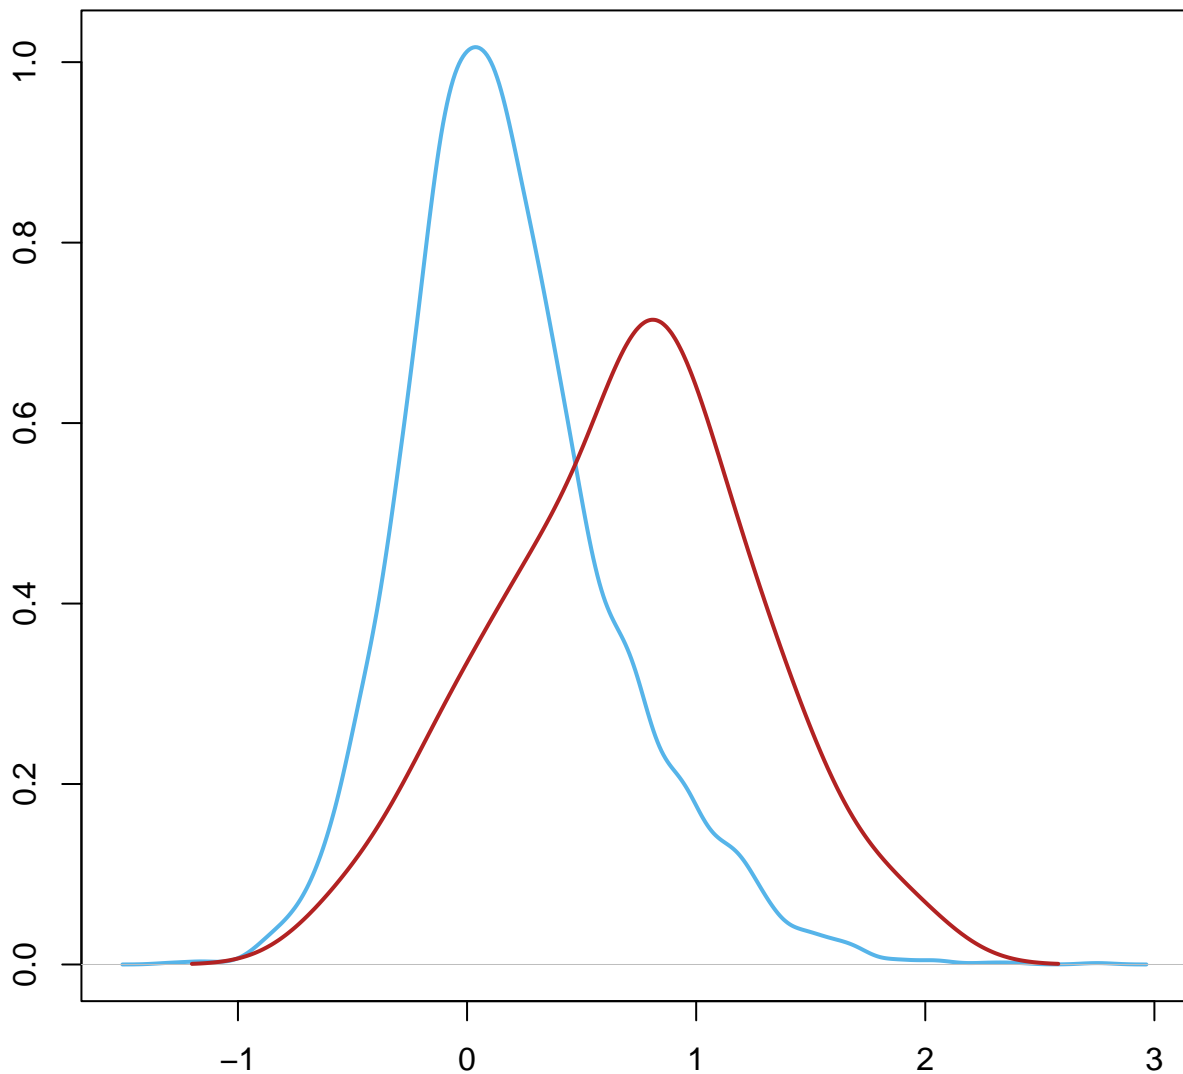

In\_Ag

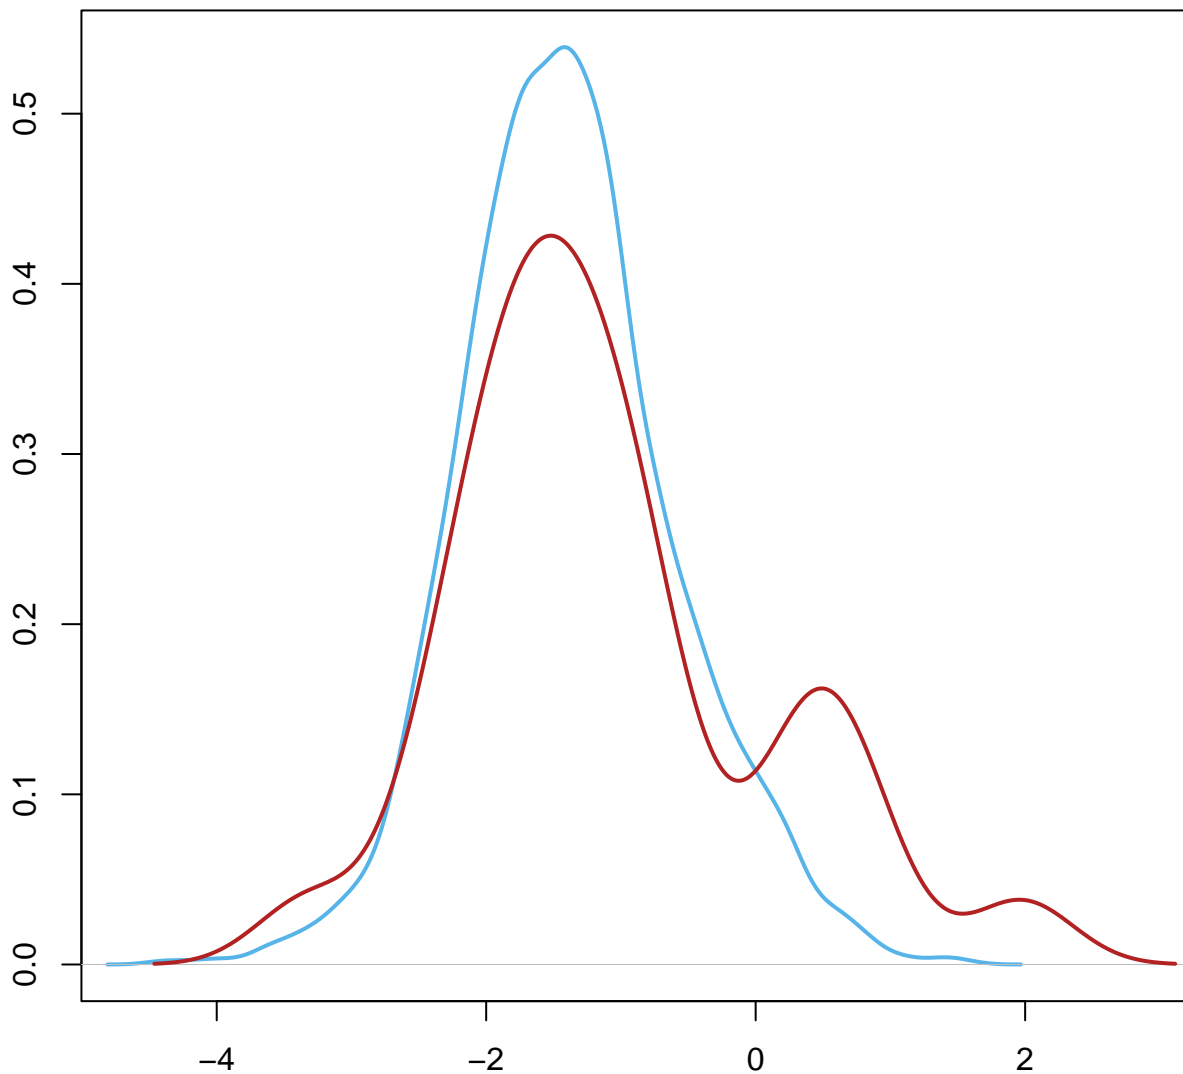



$\ln_{Cs}$

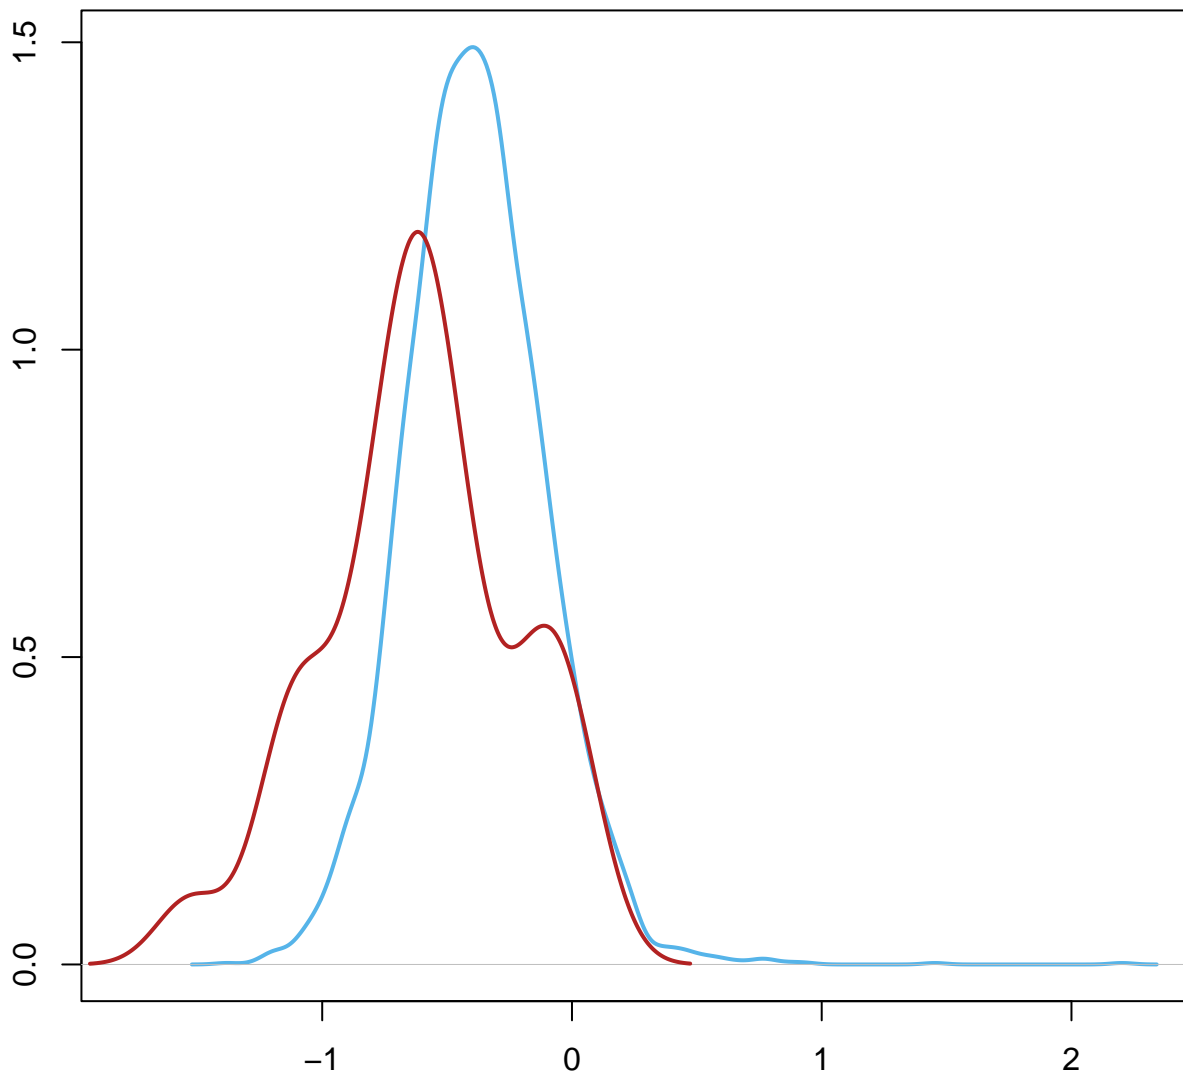

Supplement: Supporting_Figure_1.zip [file Supporting_Figure_1.zip]

In\_Na

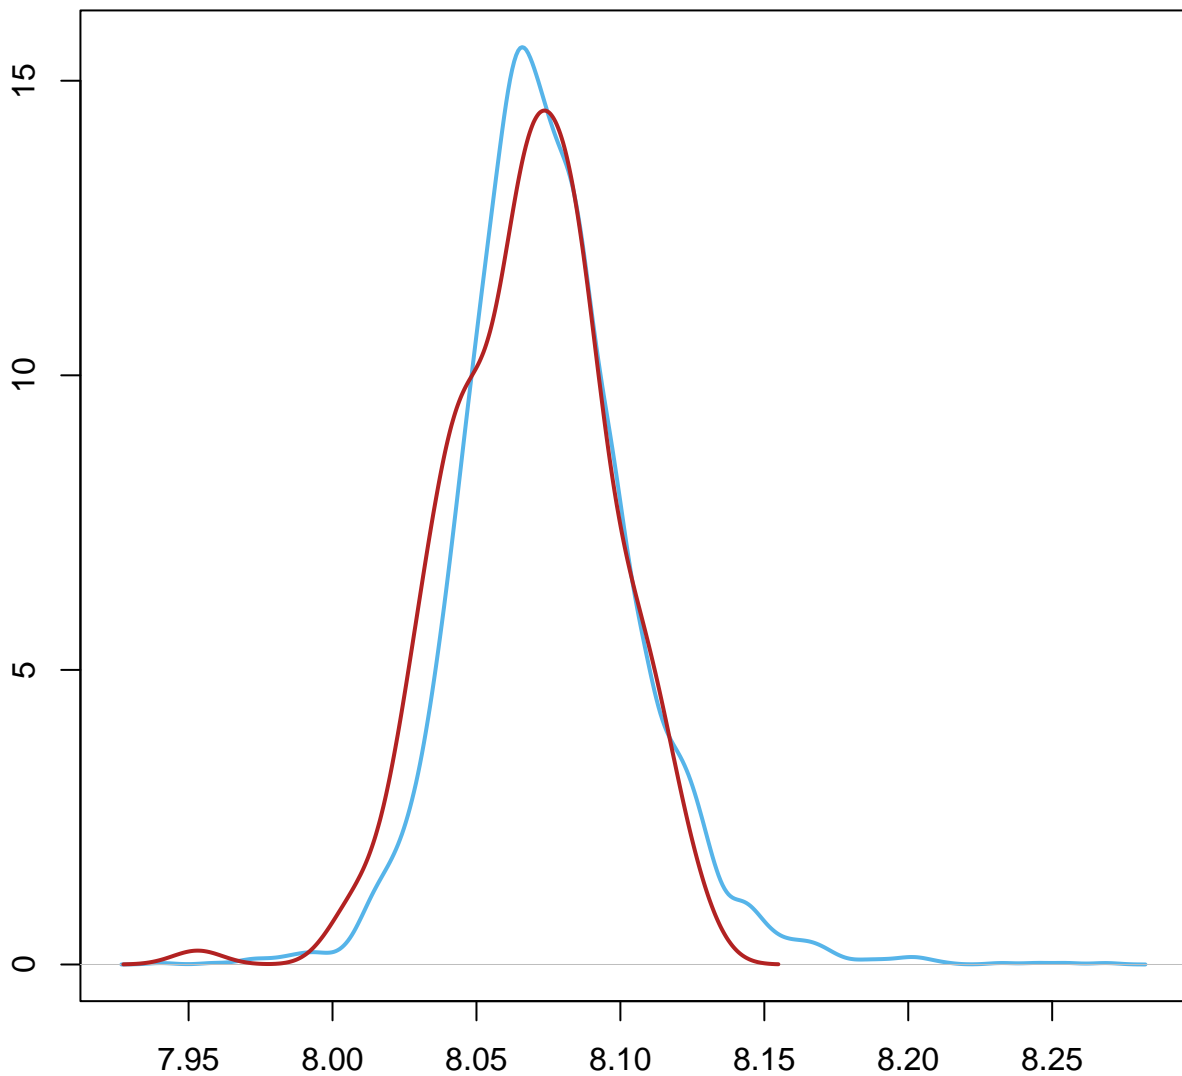

ln\_Mg

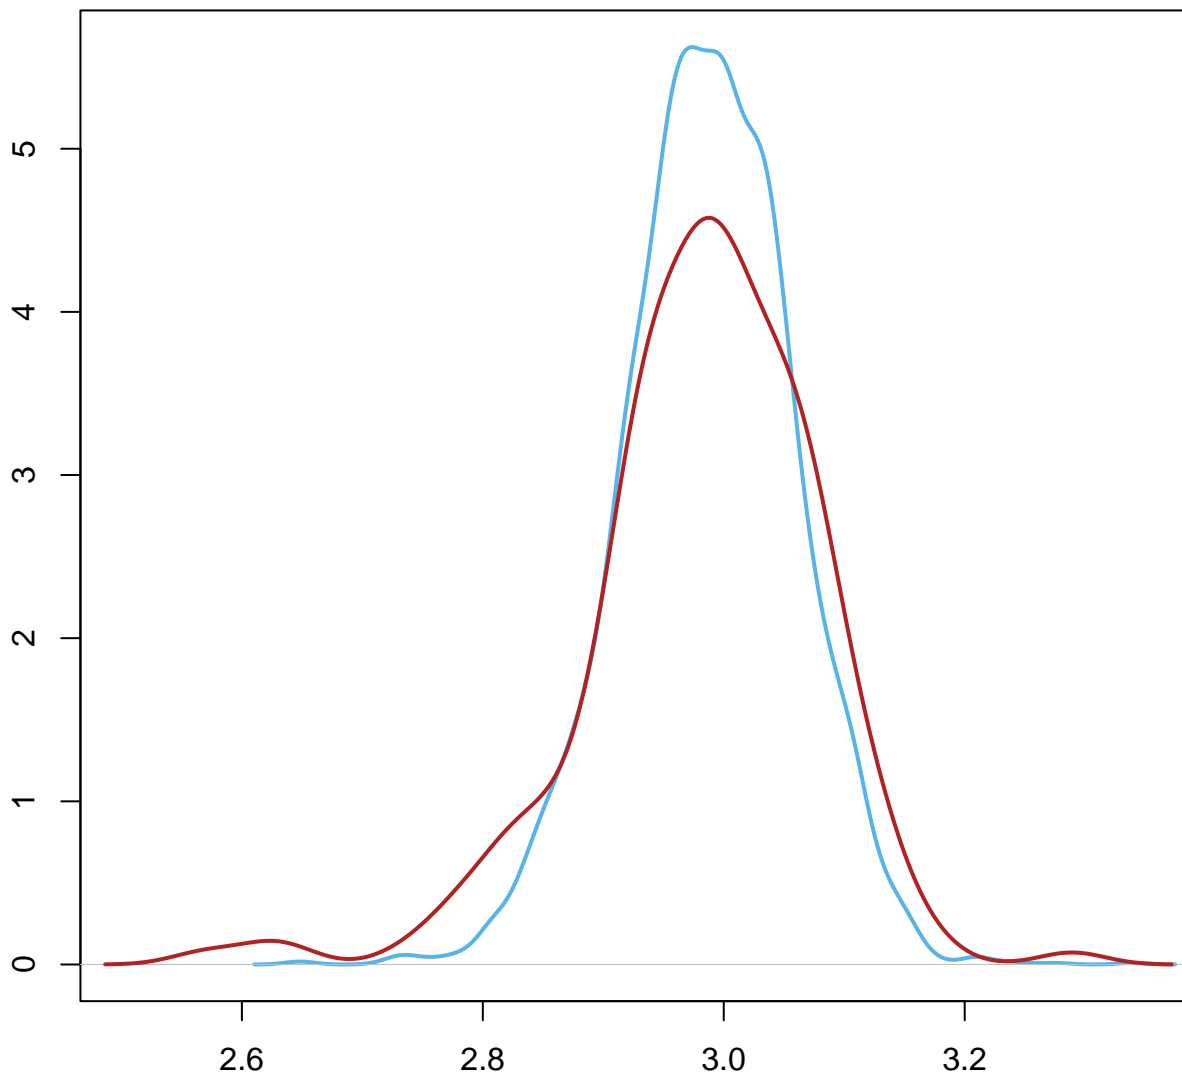

ln\_P

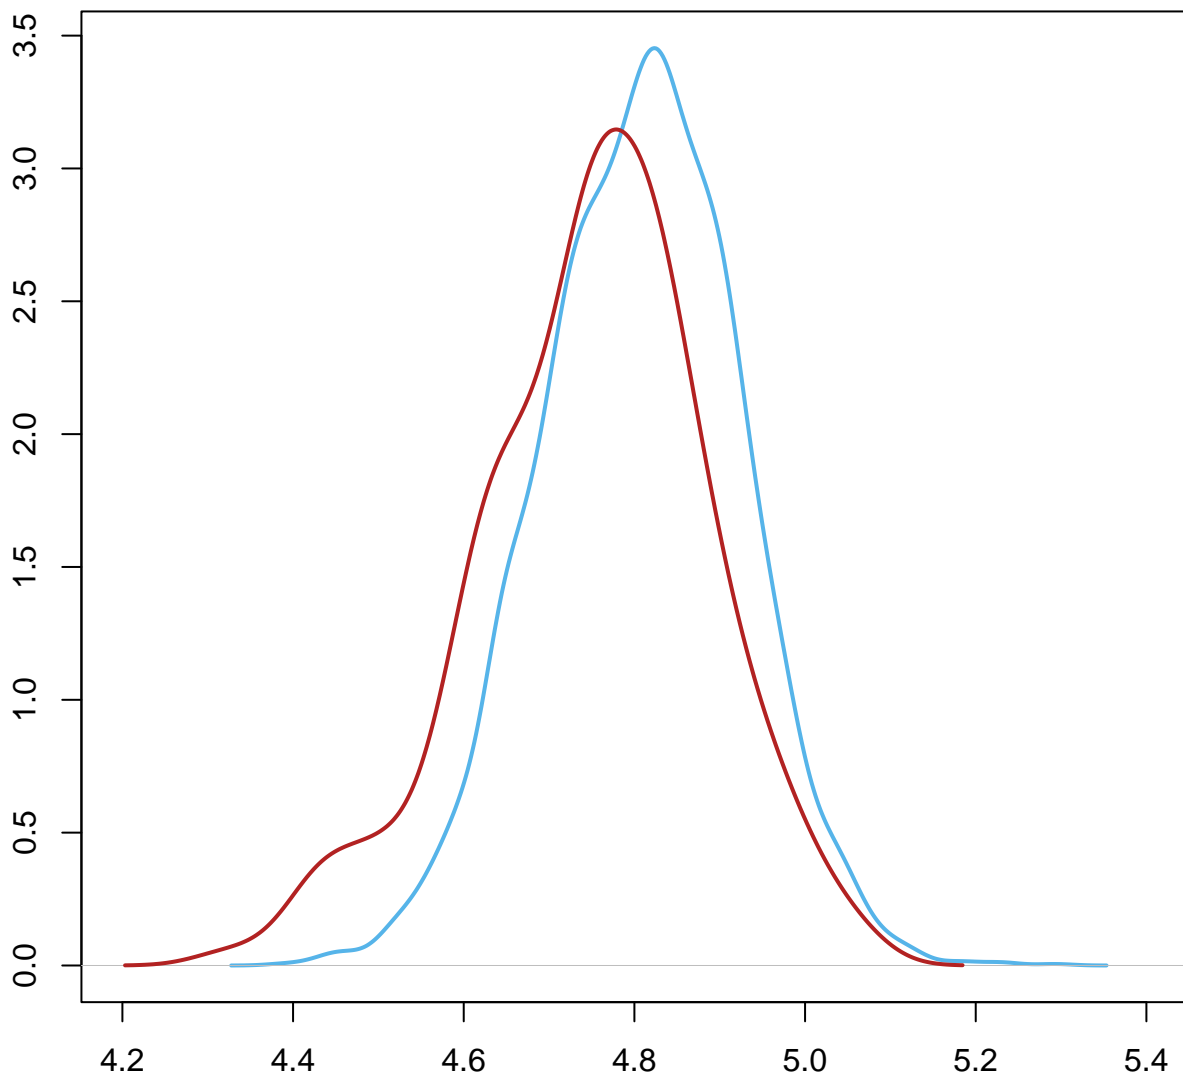

ln\_S

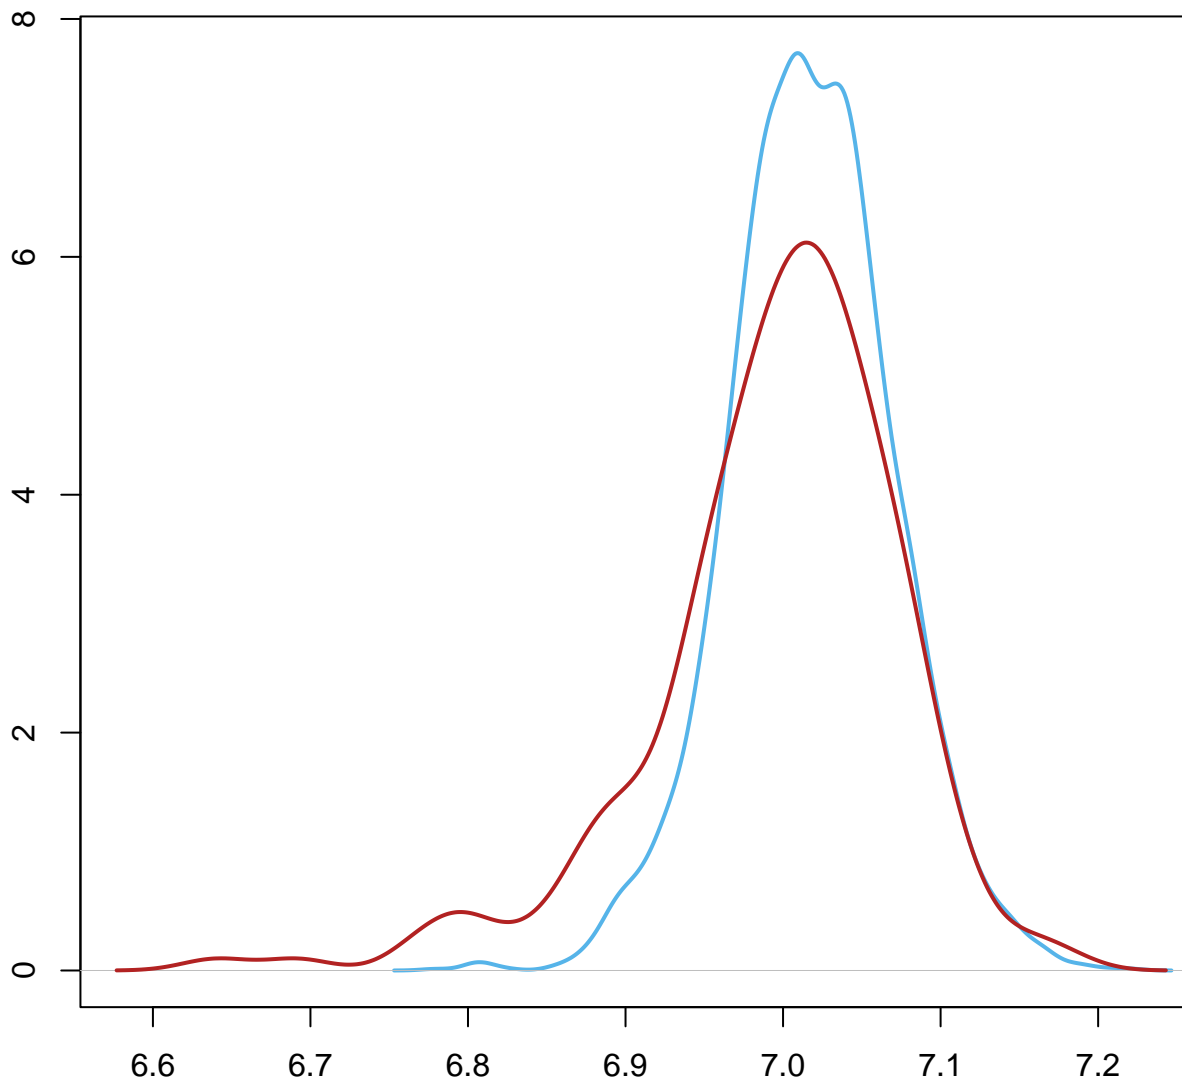

$\ln_K$

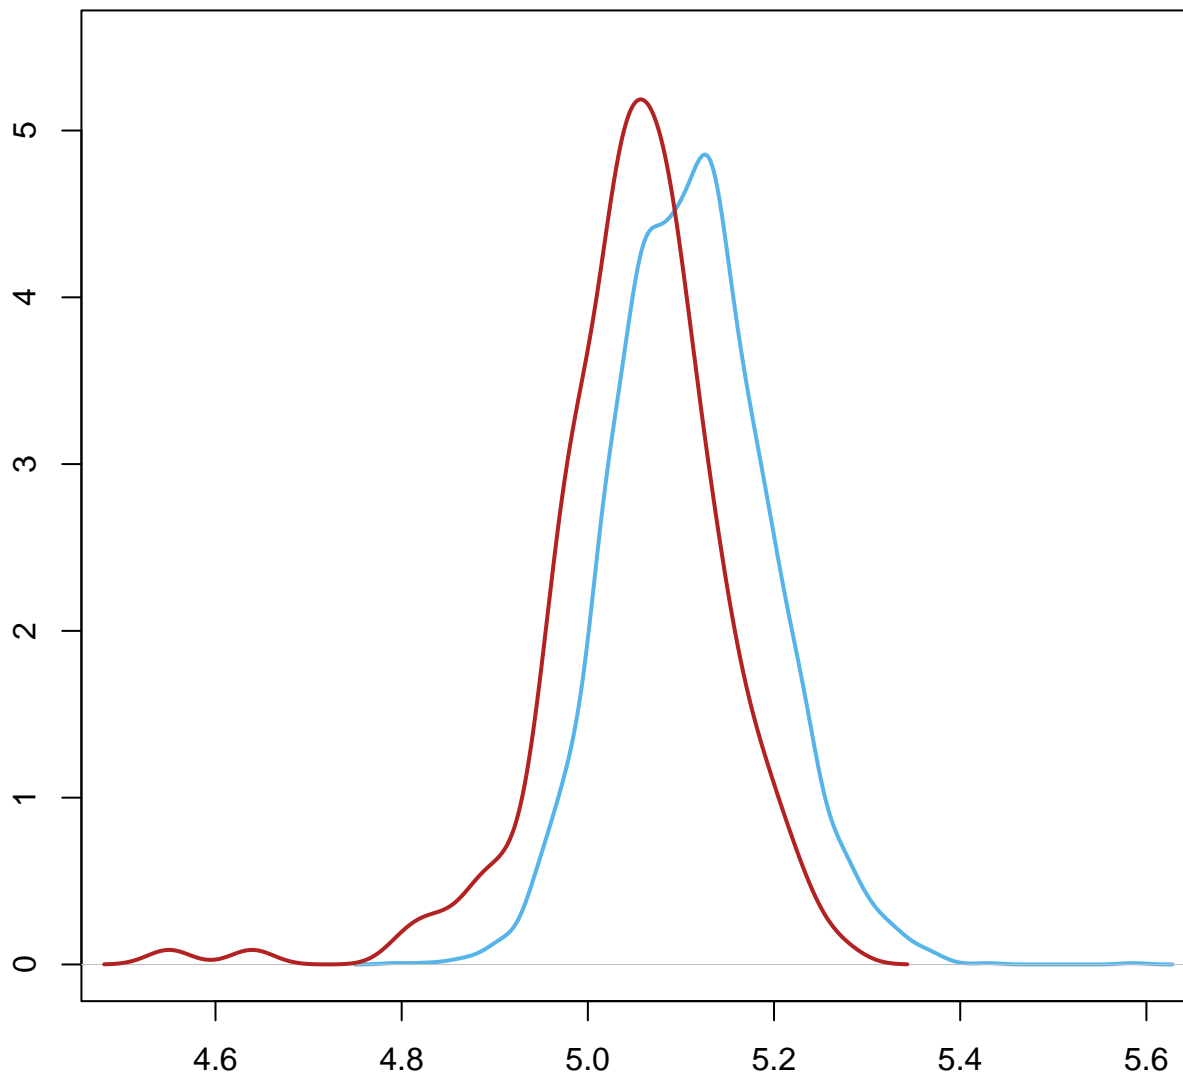

In\_Ca

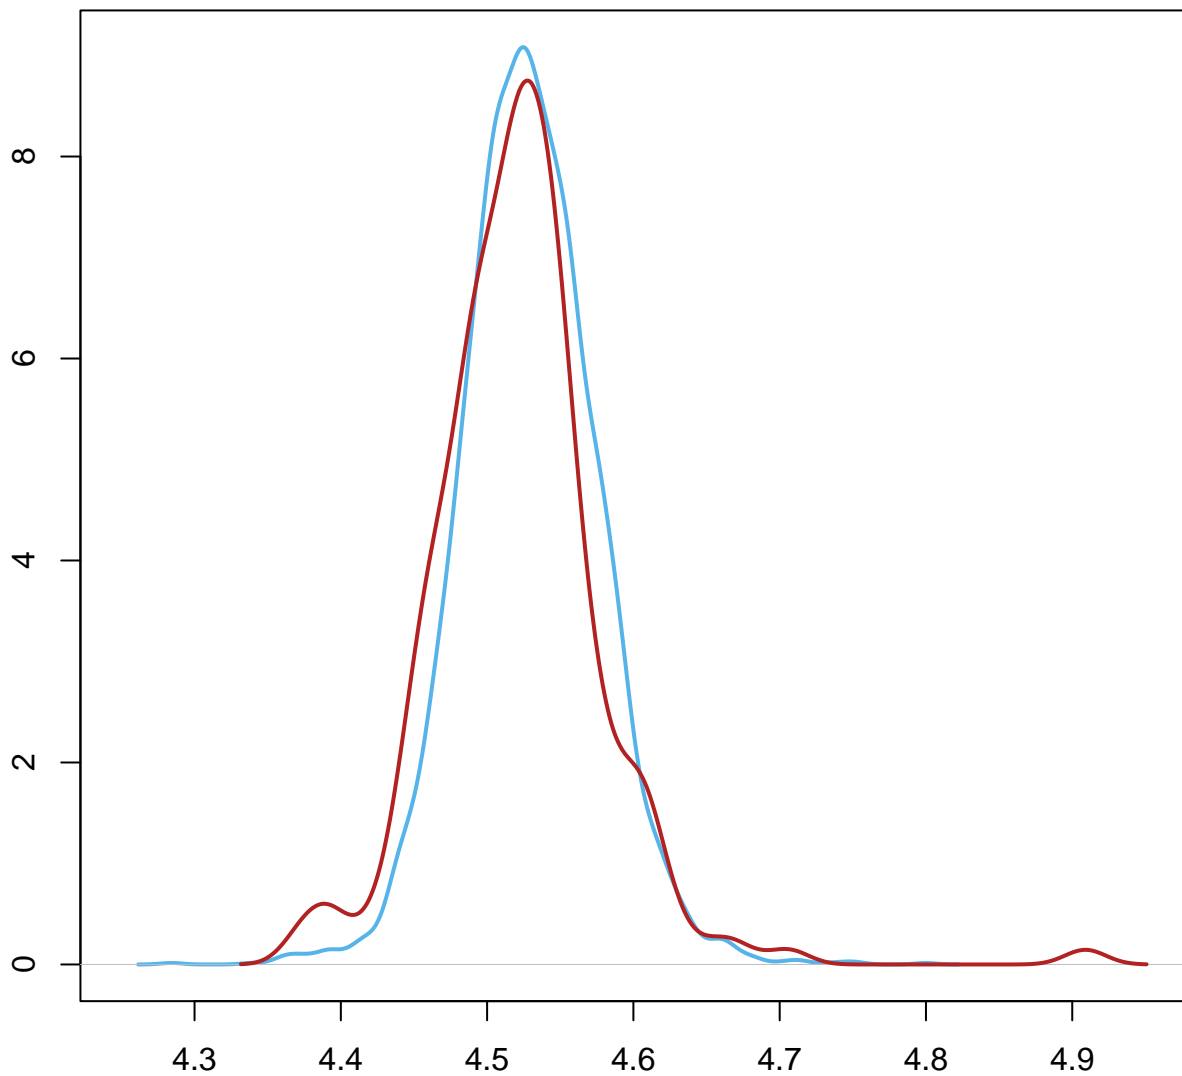

In\_Fe

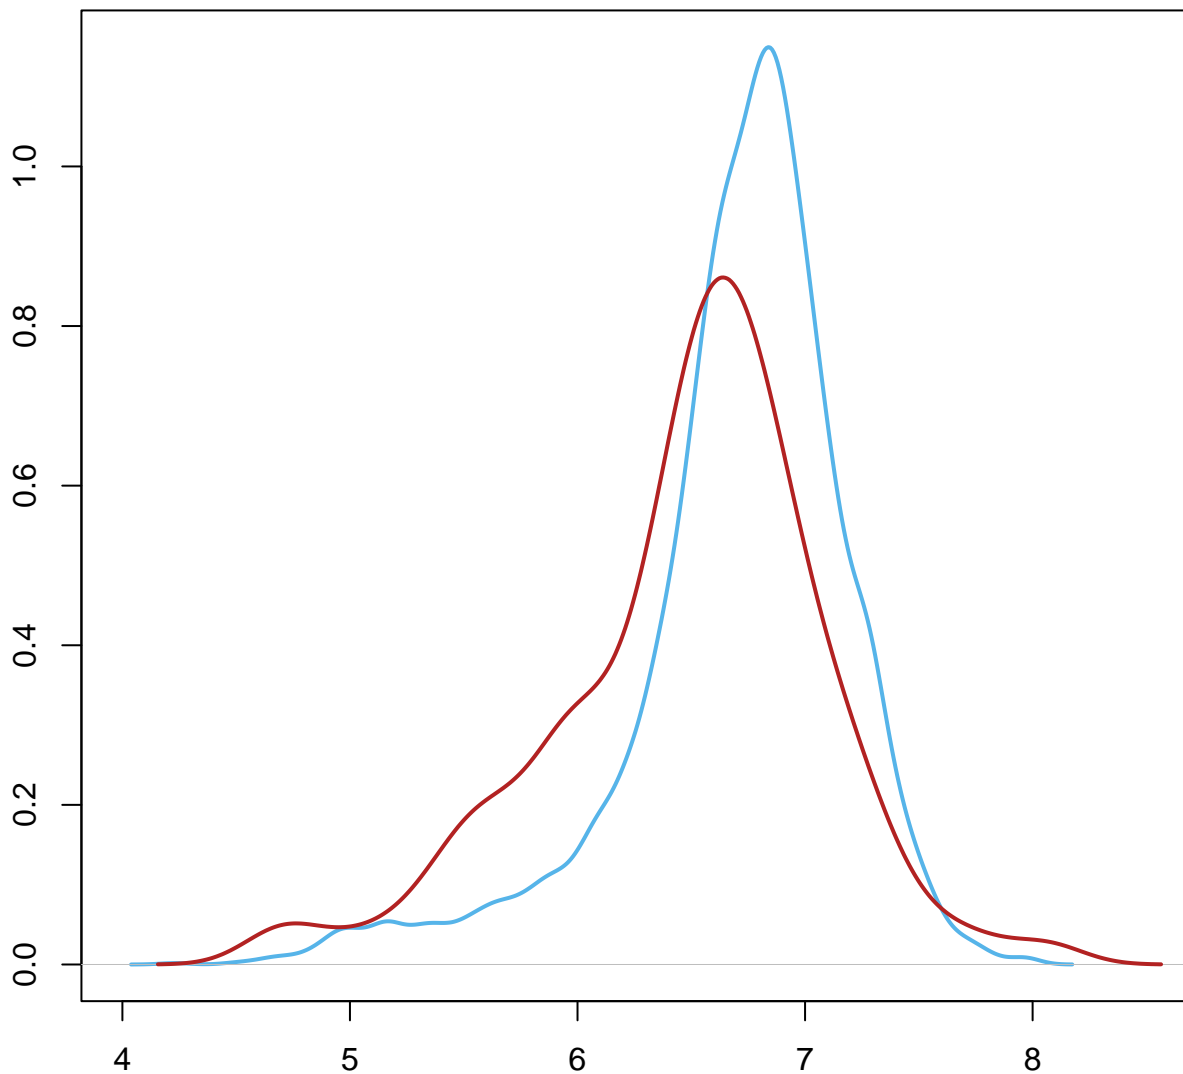

In\_Co

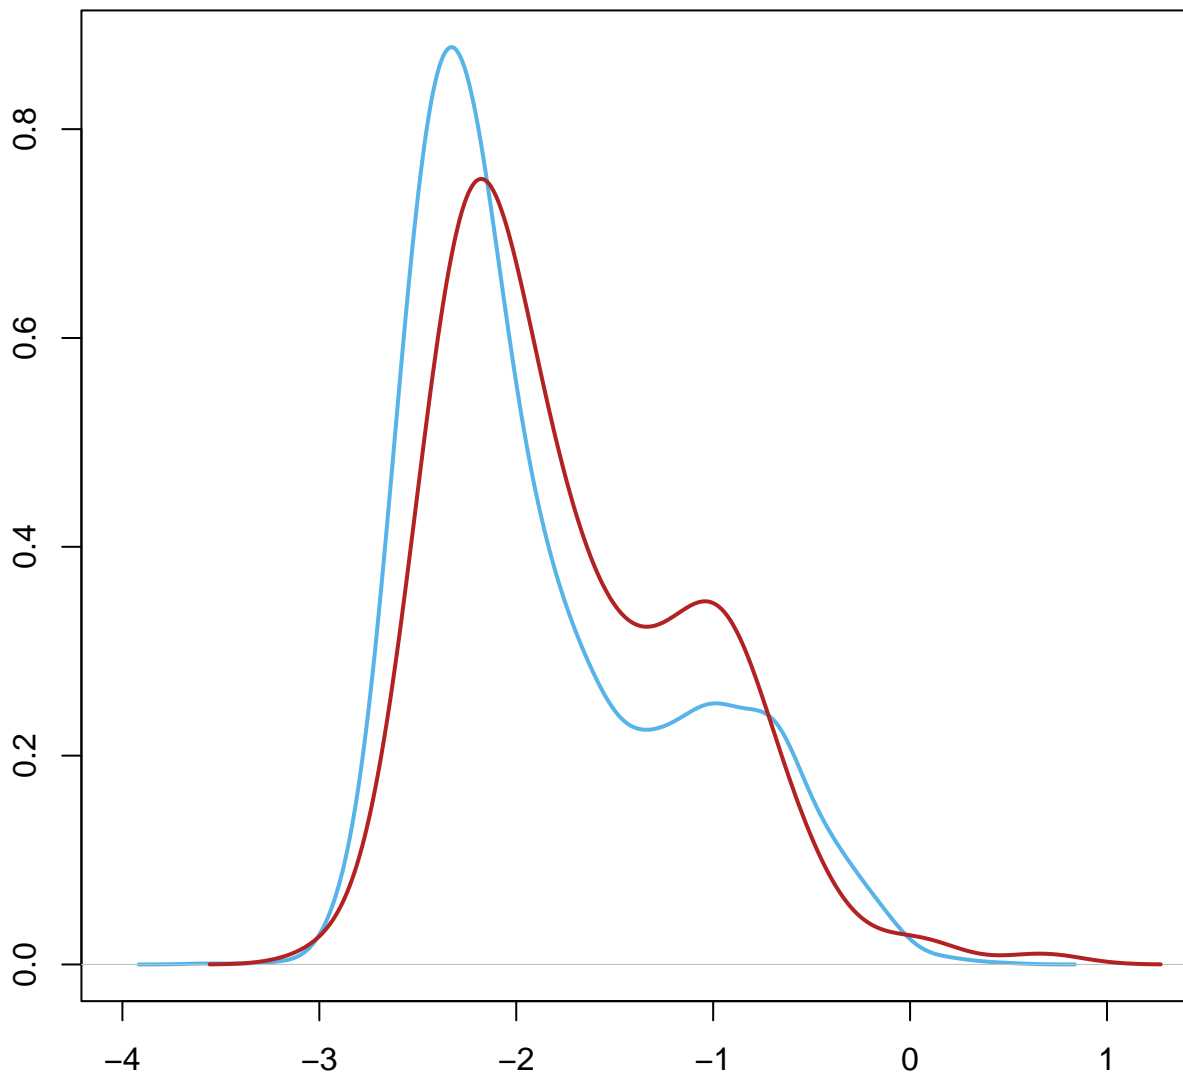



In\_Cu

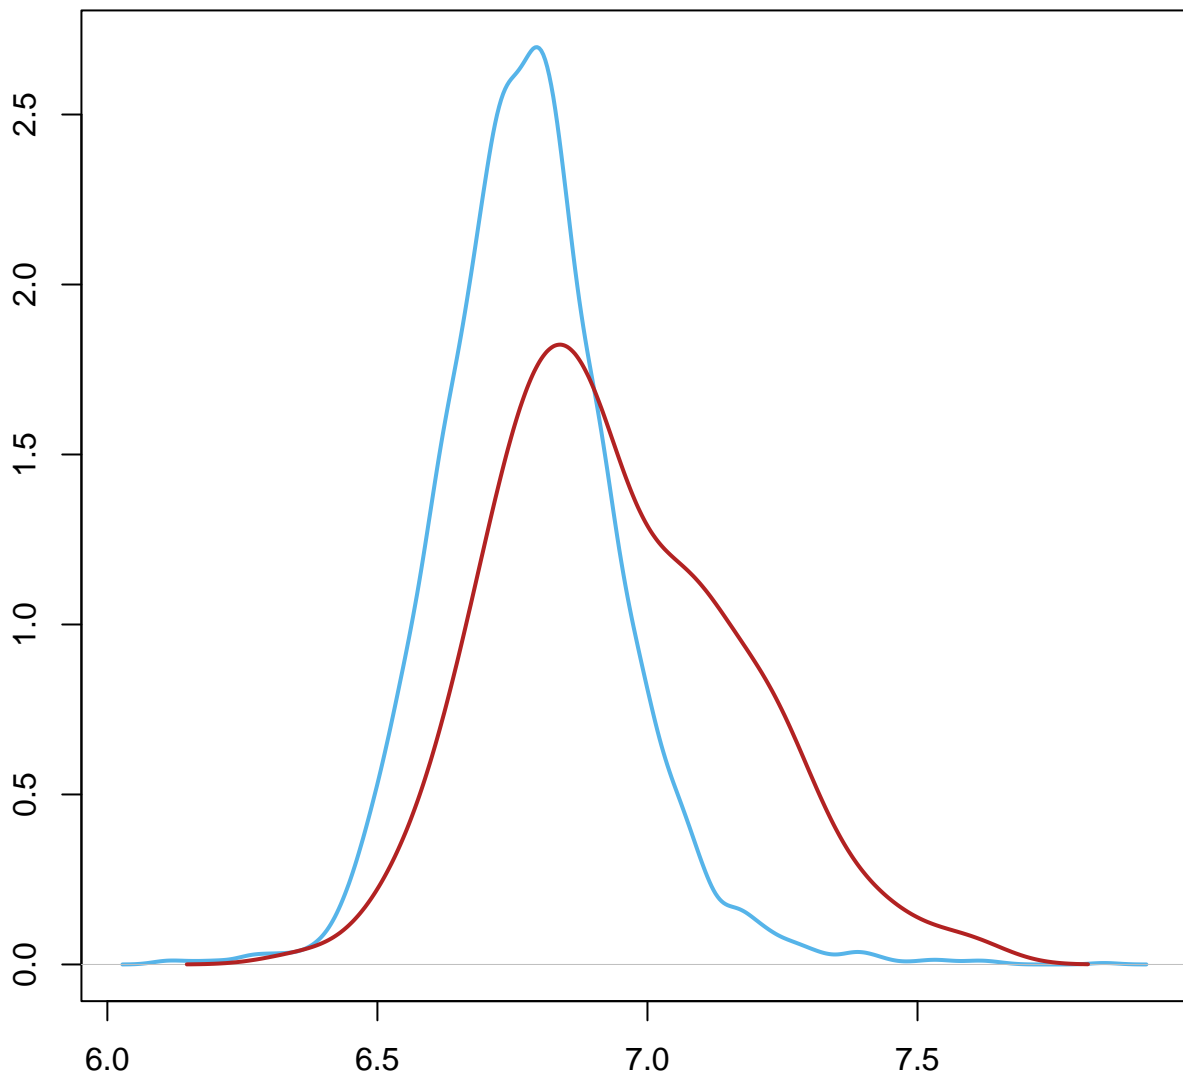

ln\_Zn

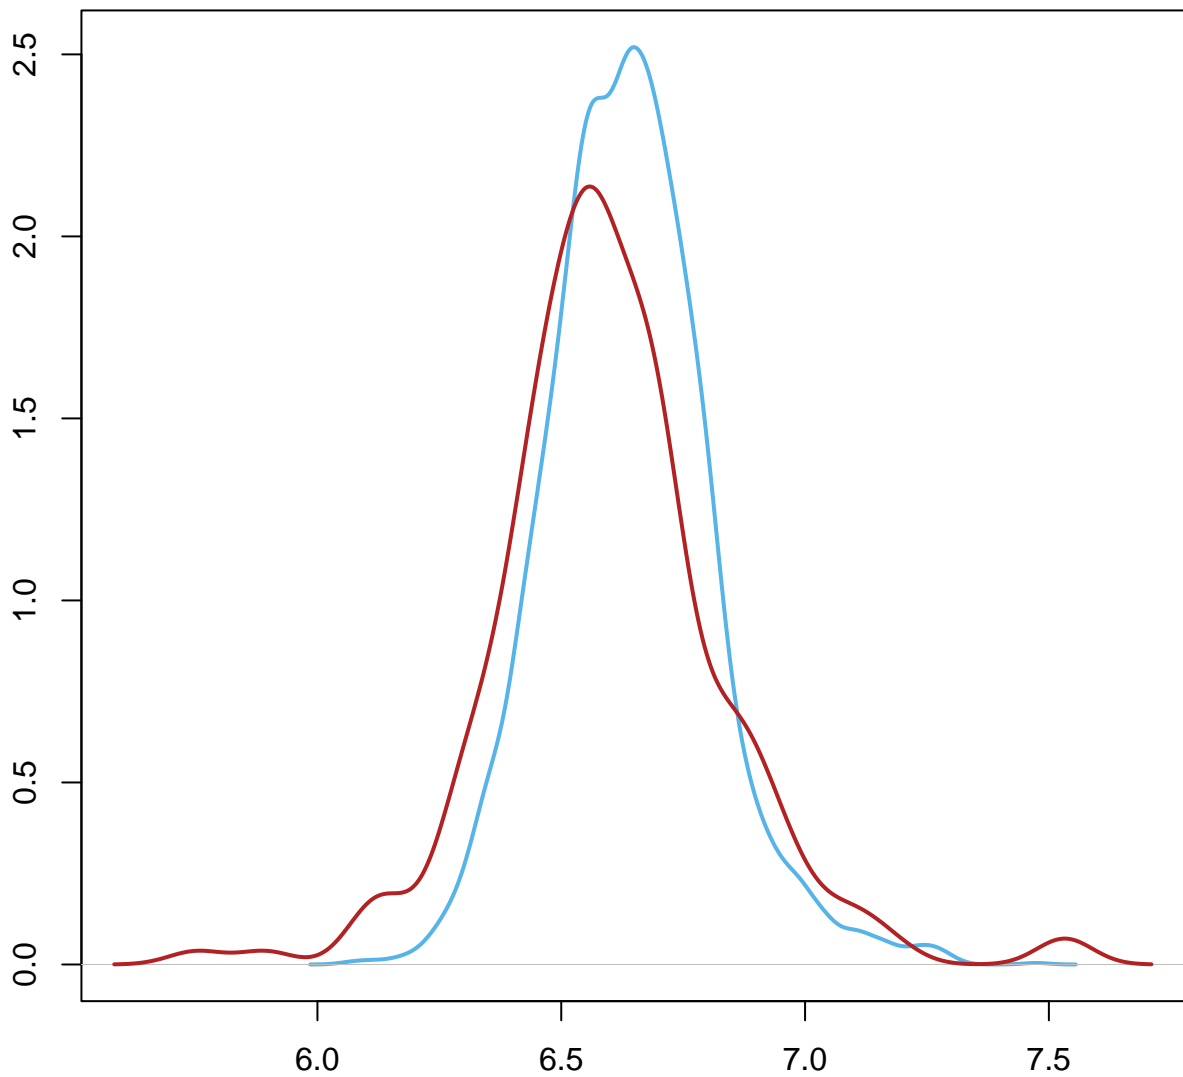

**ln\_As**

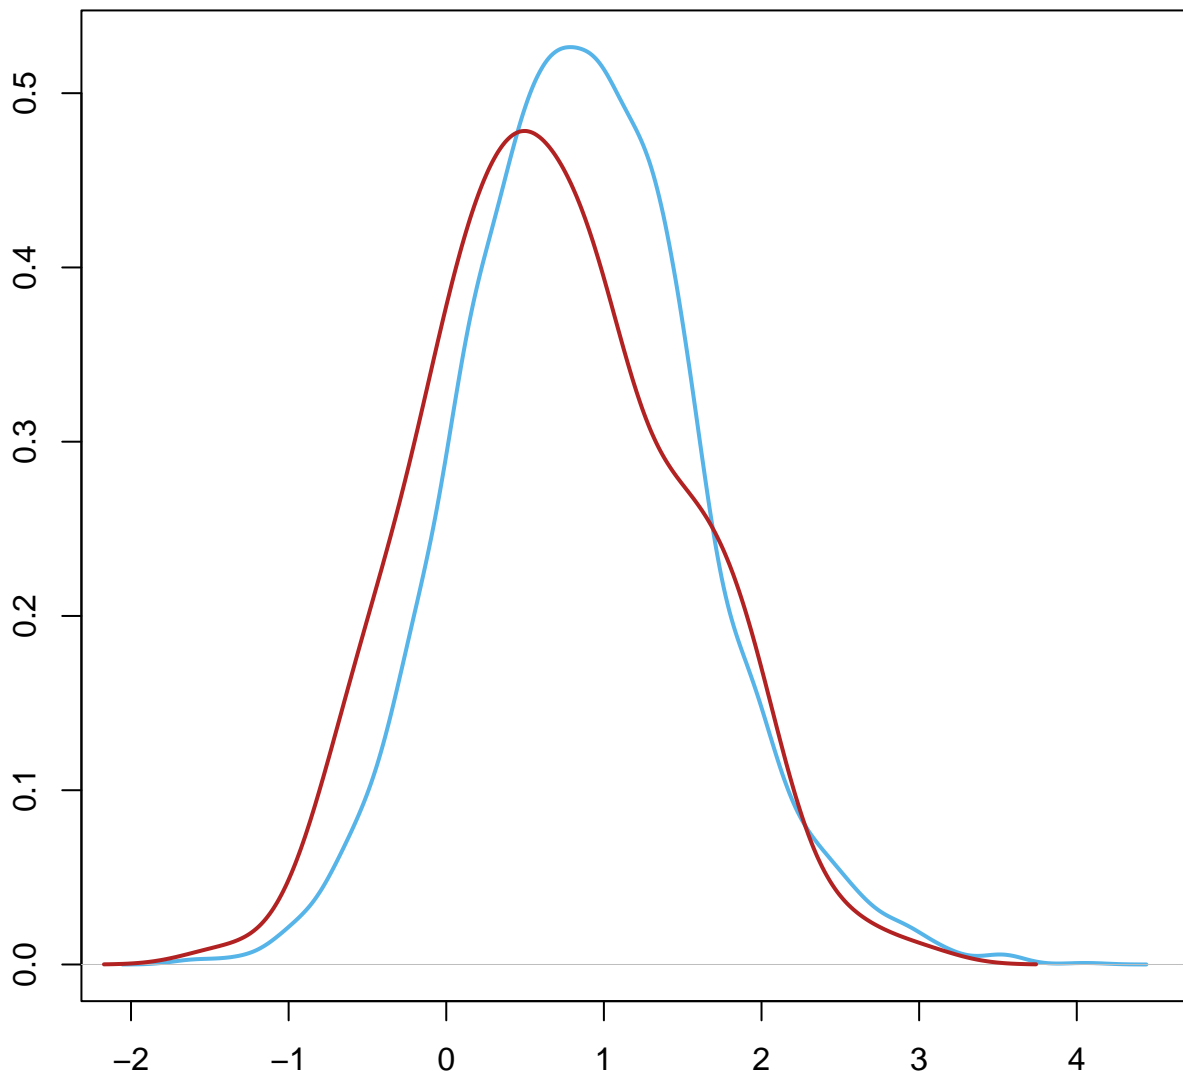

In\_Se

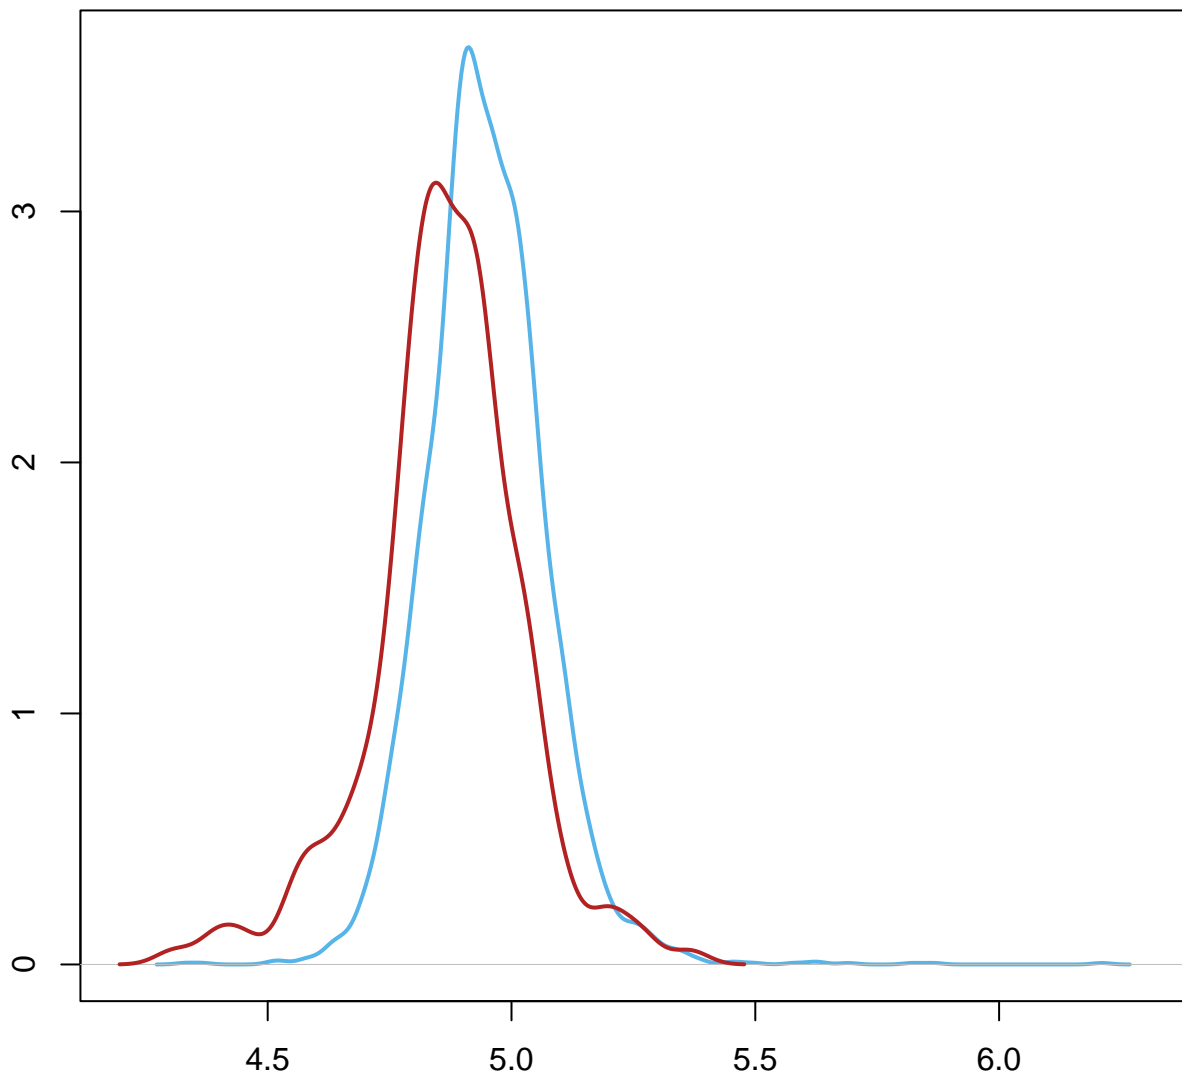

**ln\_Rb**

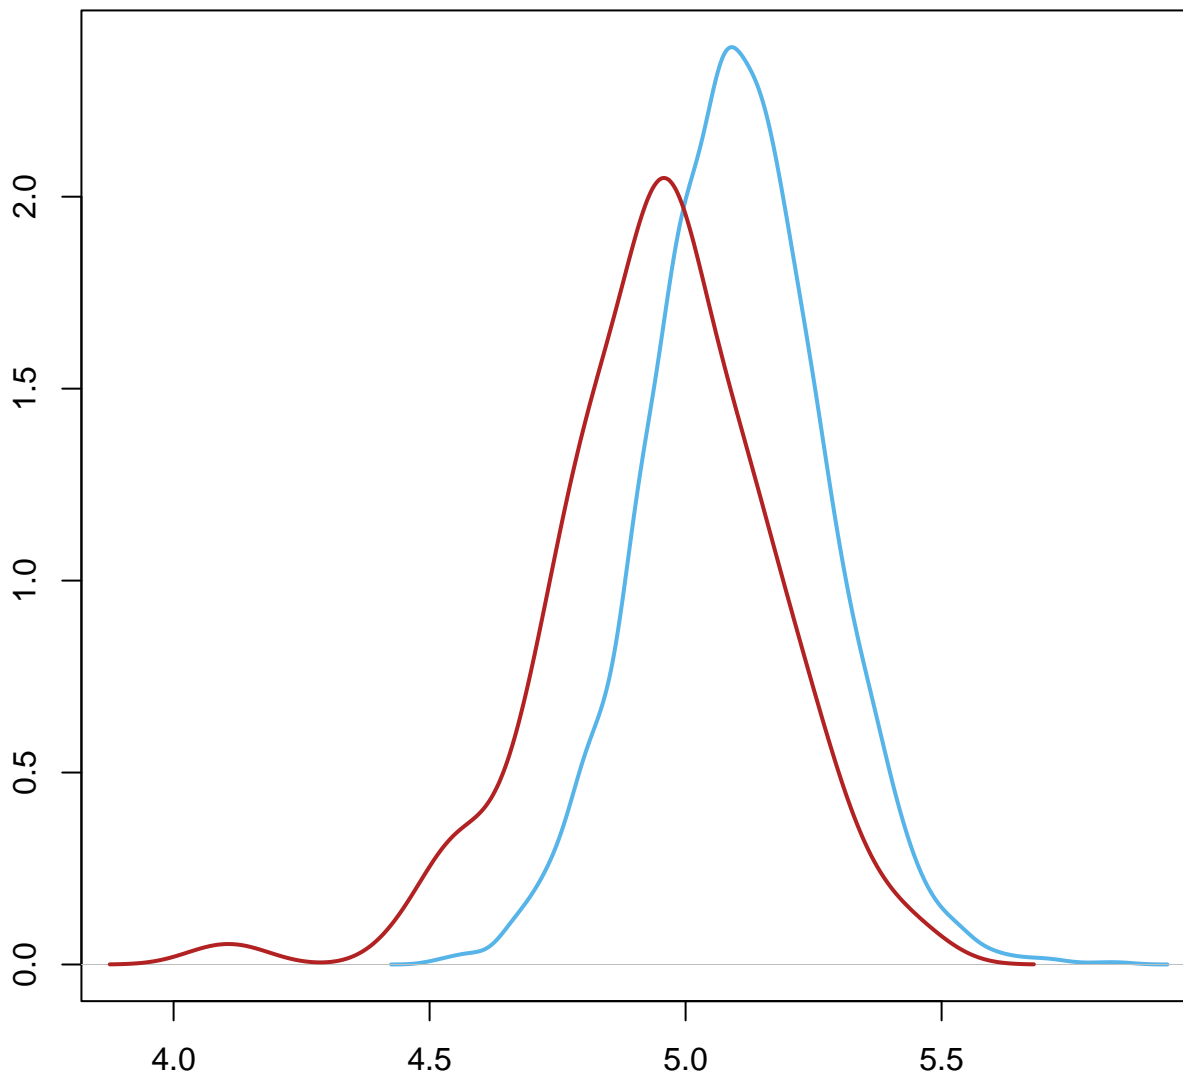

In\_Sr

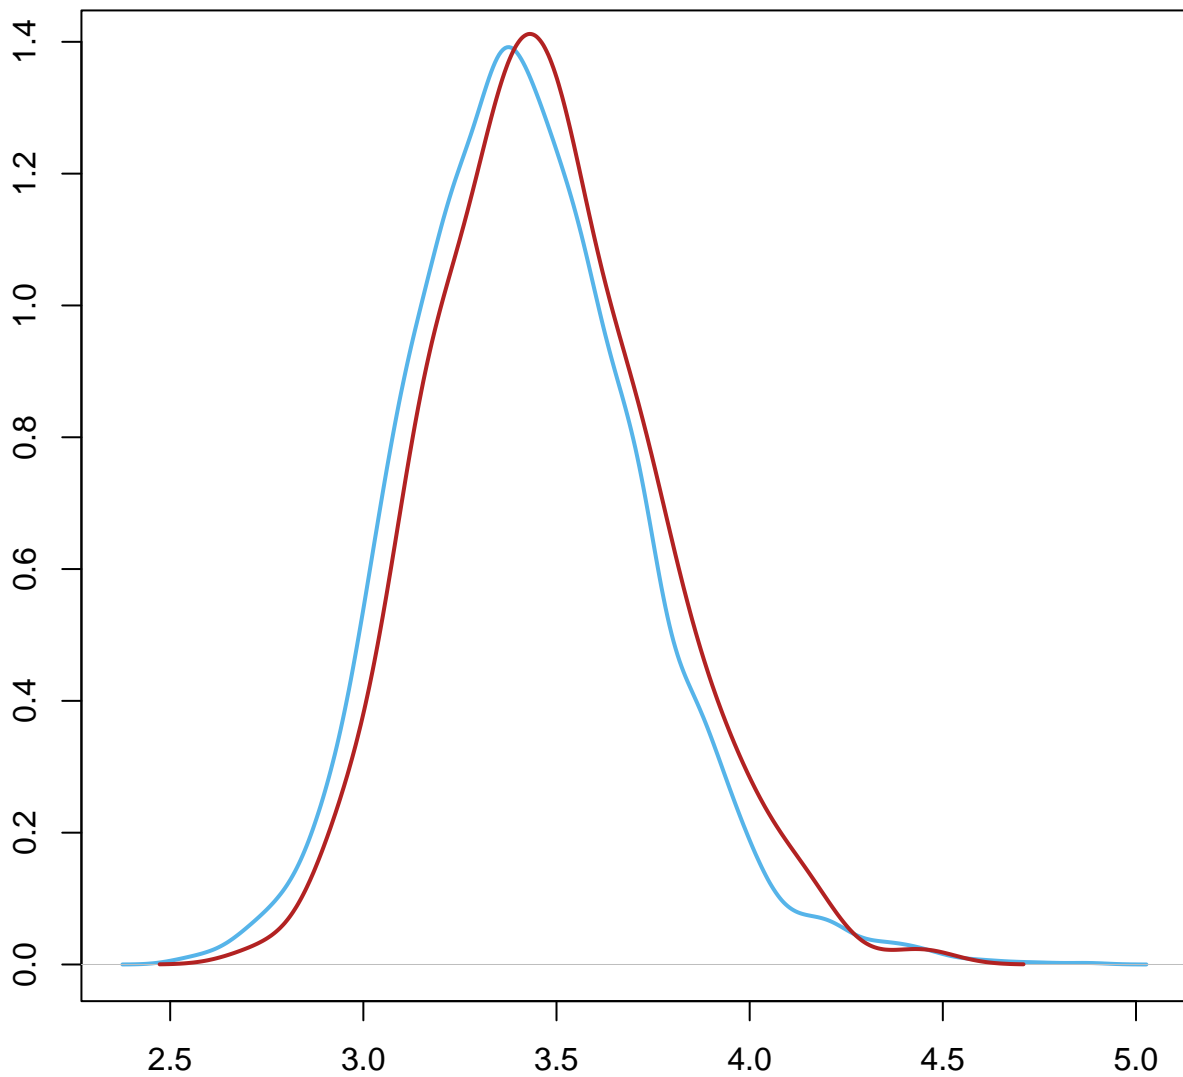

In\_Mo

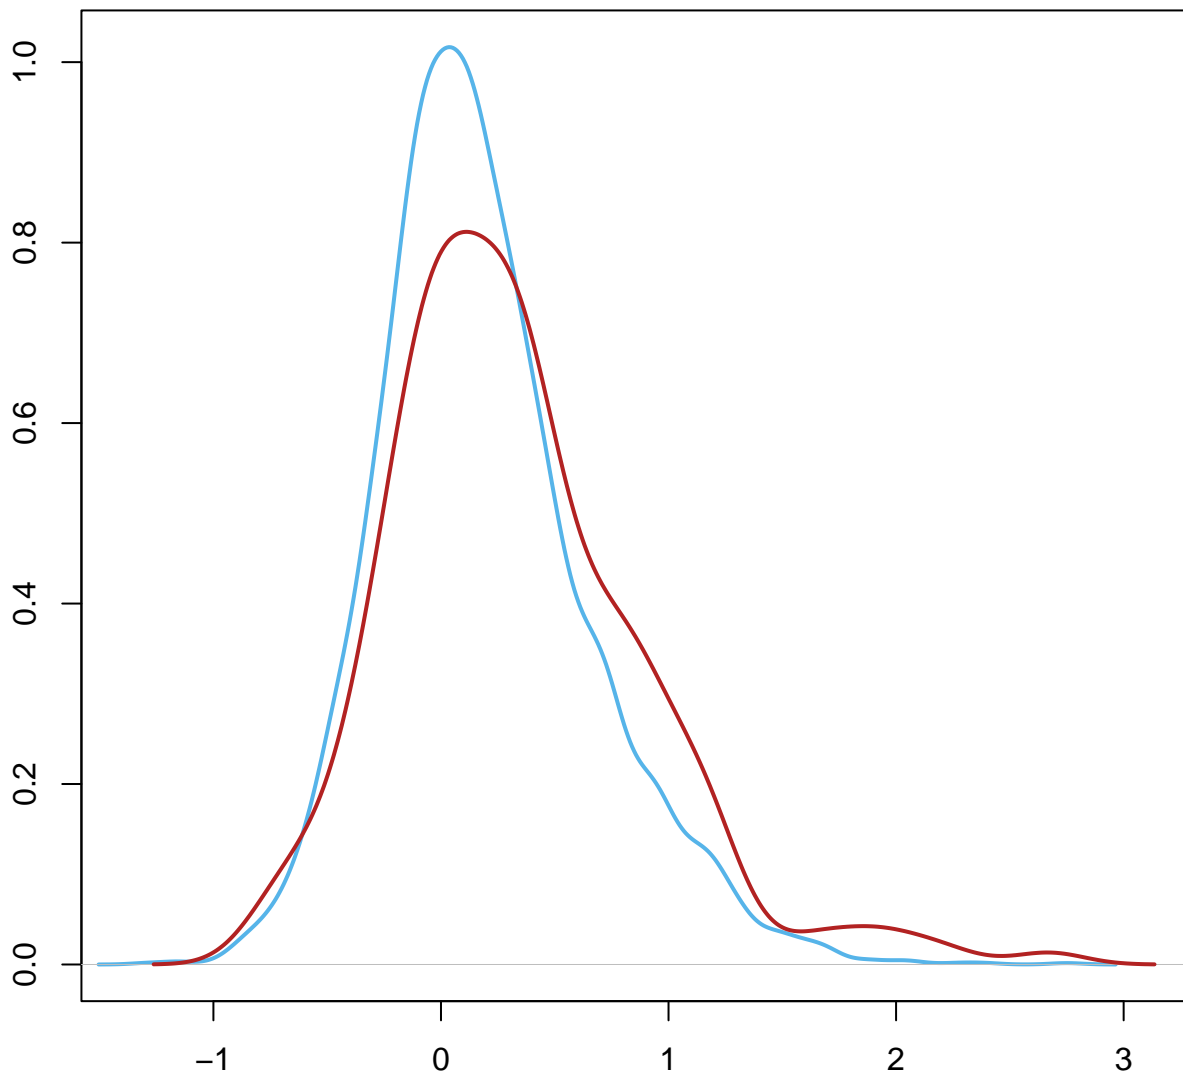

**ln\_Ag**

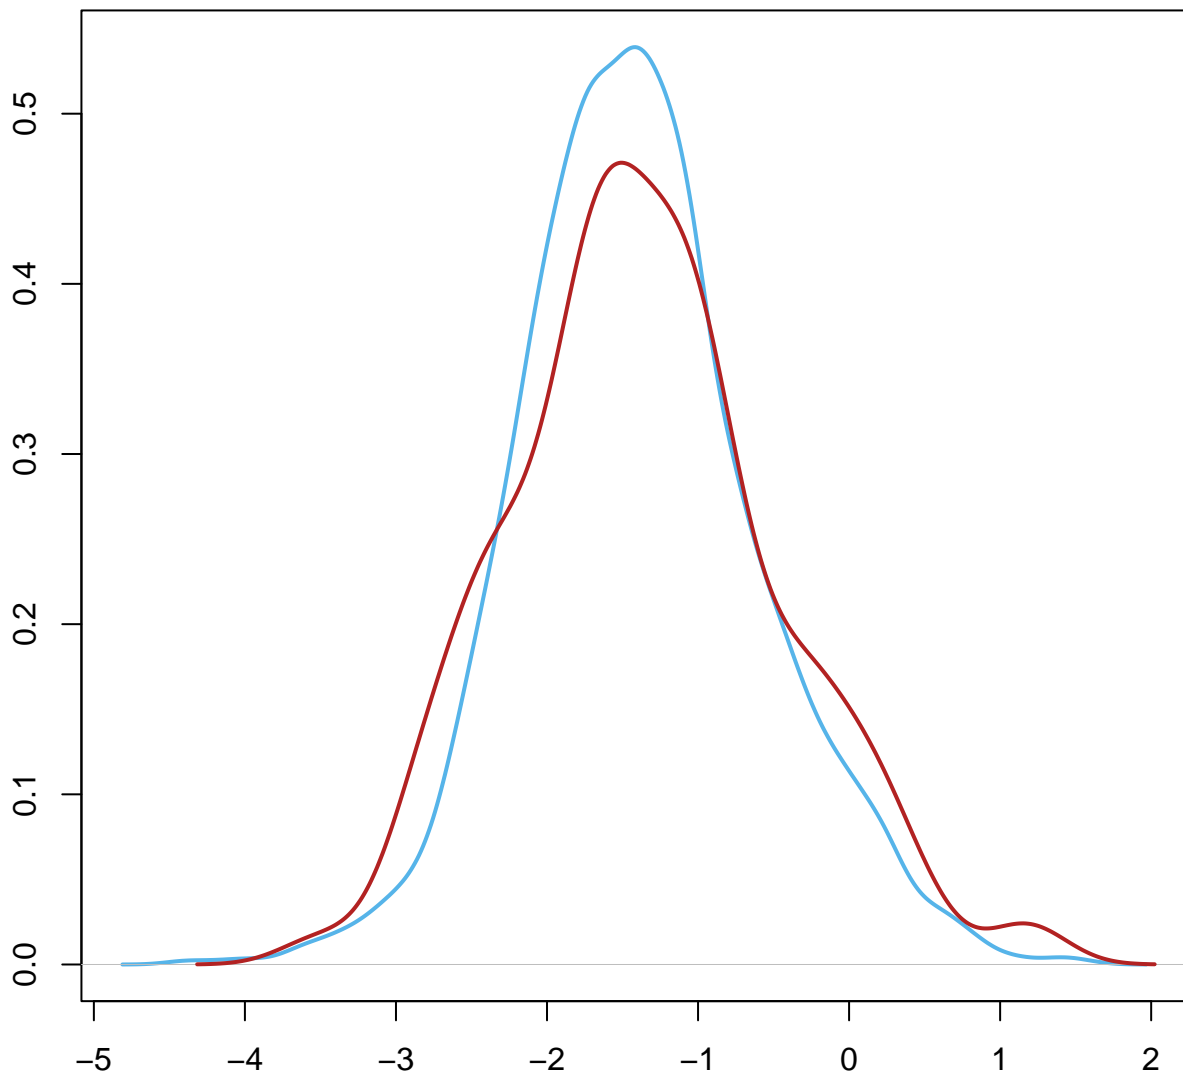



**ln\_Cs**

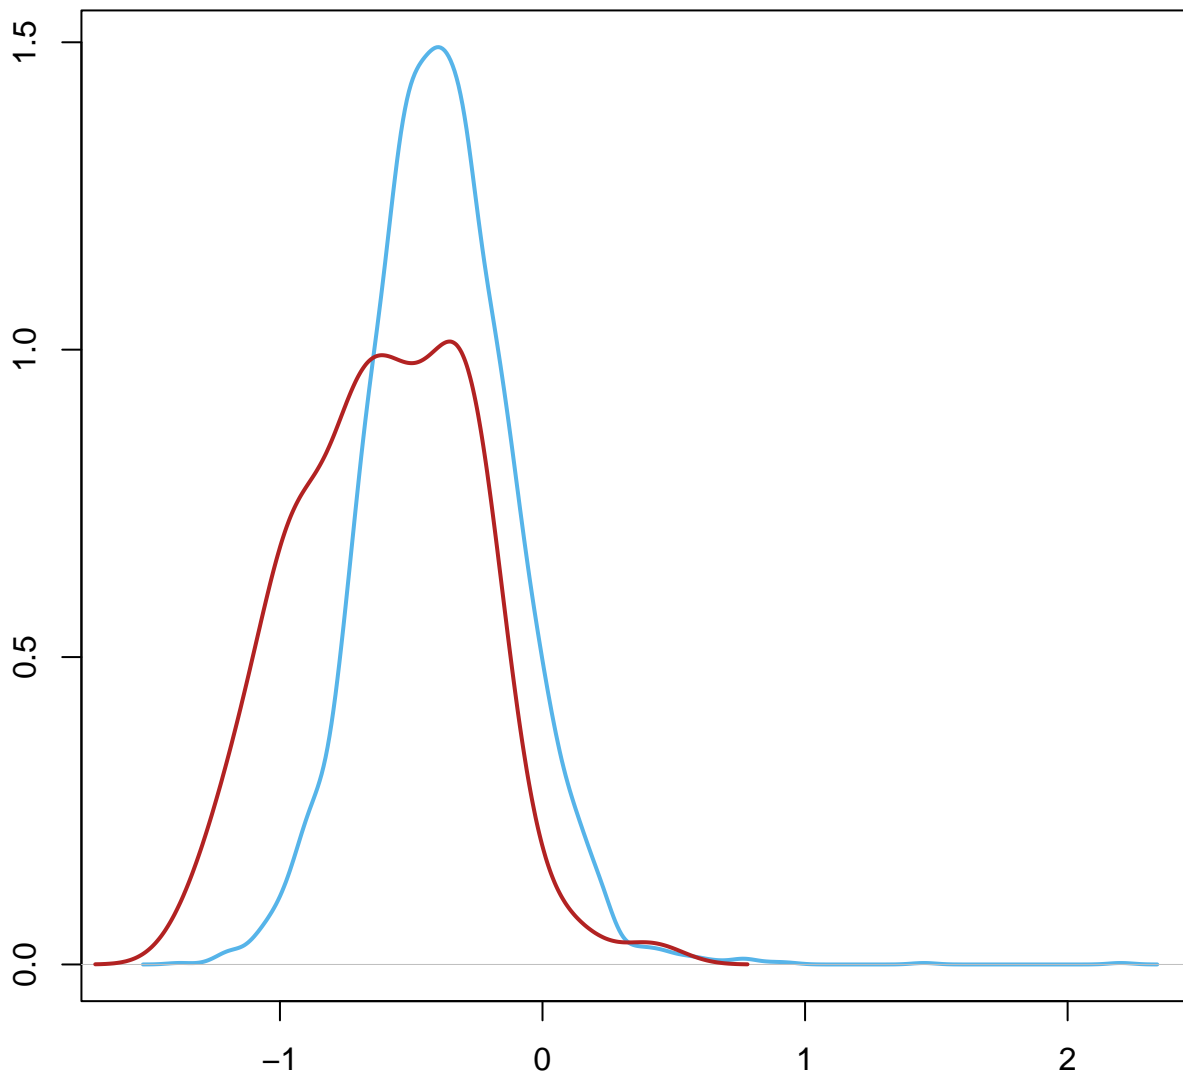

Supplement: Supporting_Figure_1.zip [file Supporting_Figure_1.zip]

In\_Na

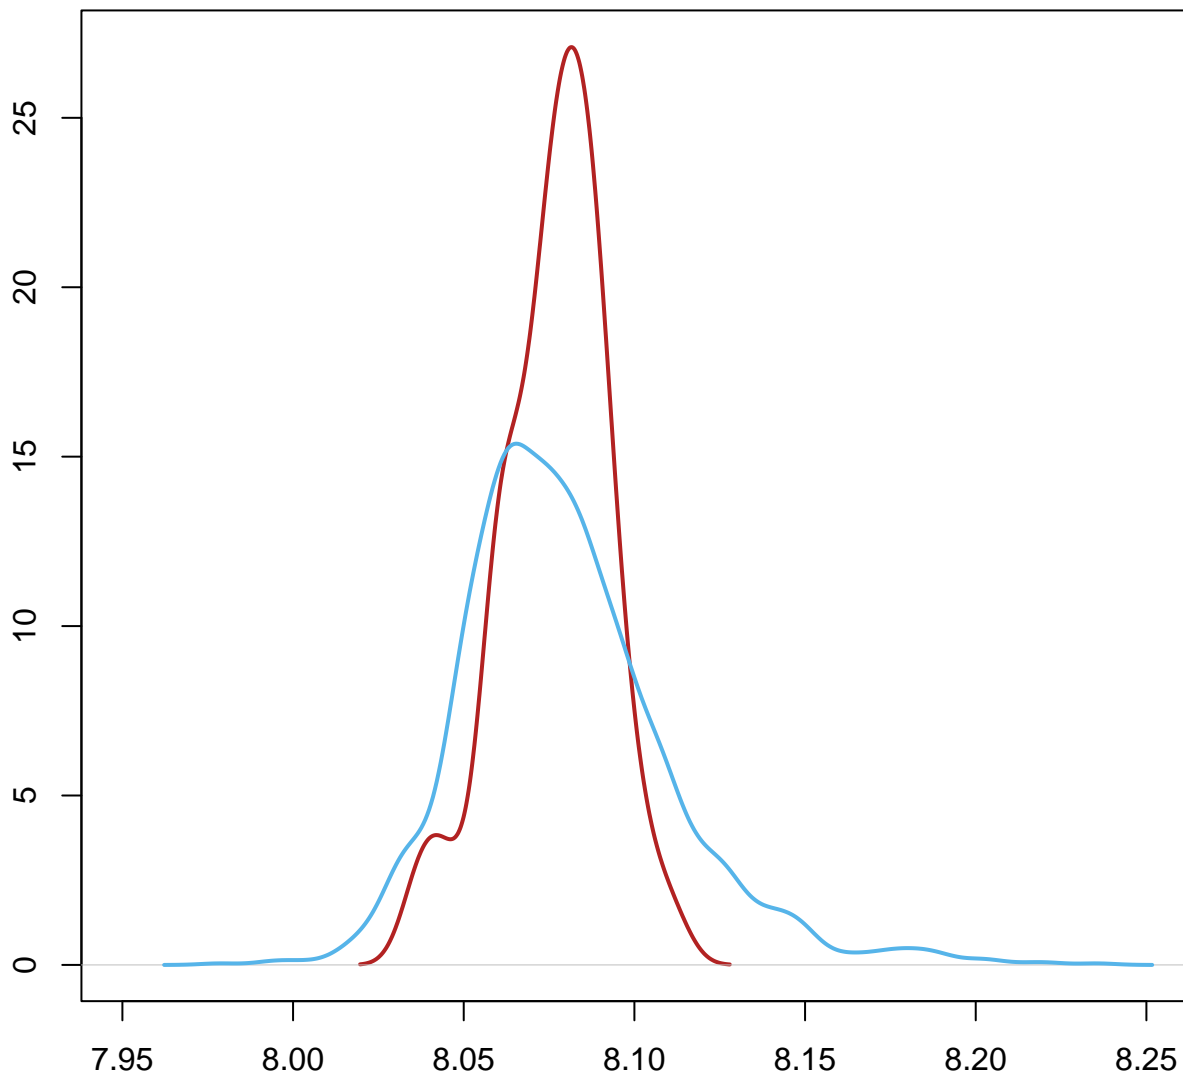

**ln\_Mg**

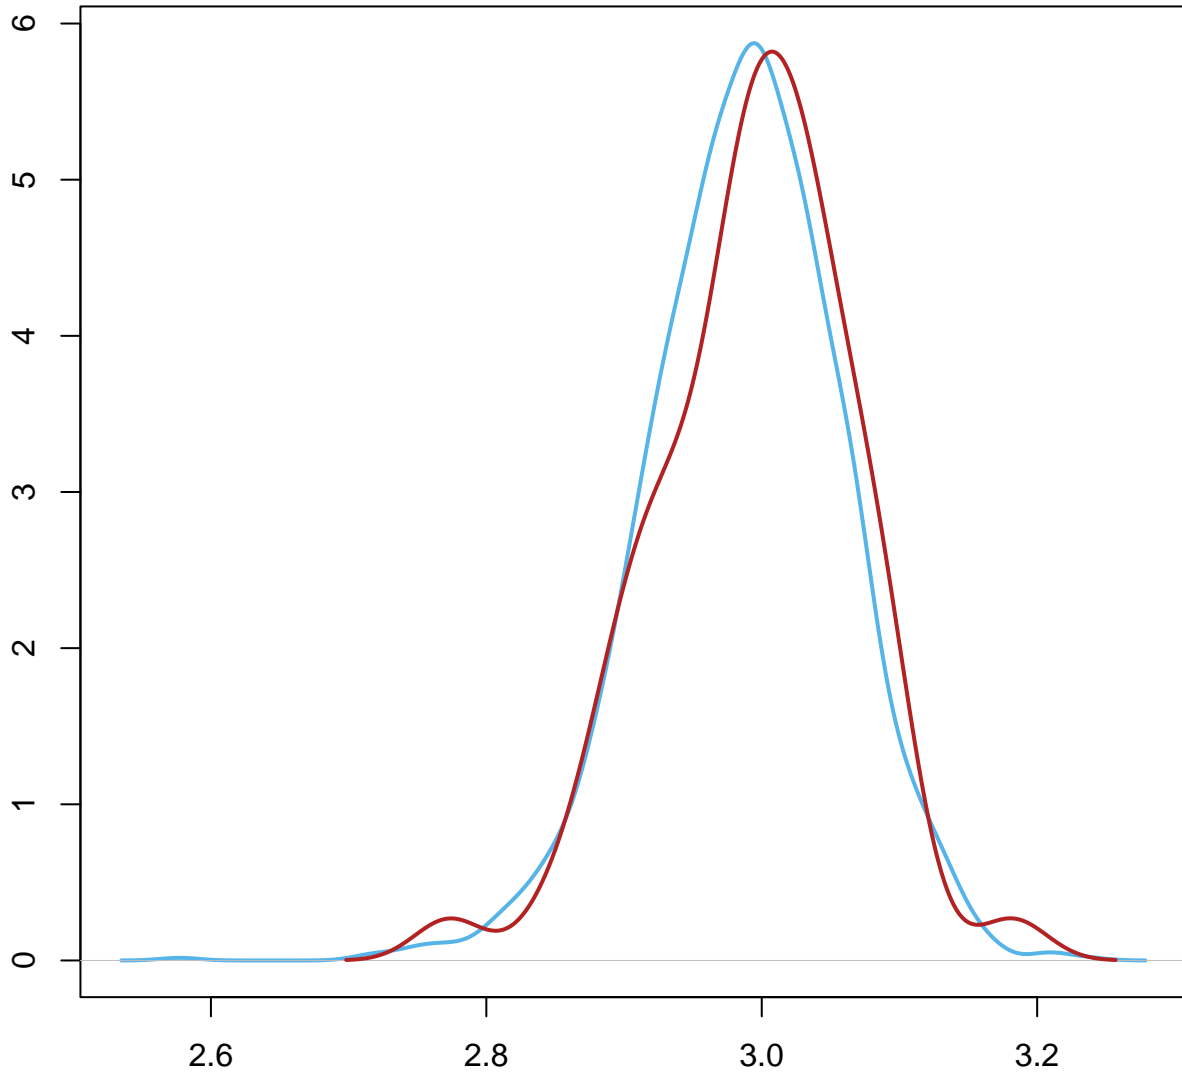

ln\_P

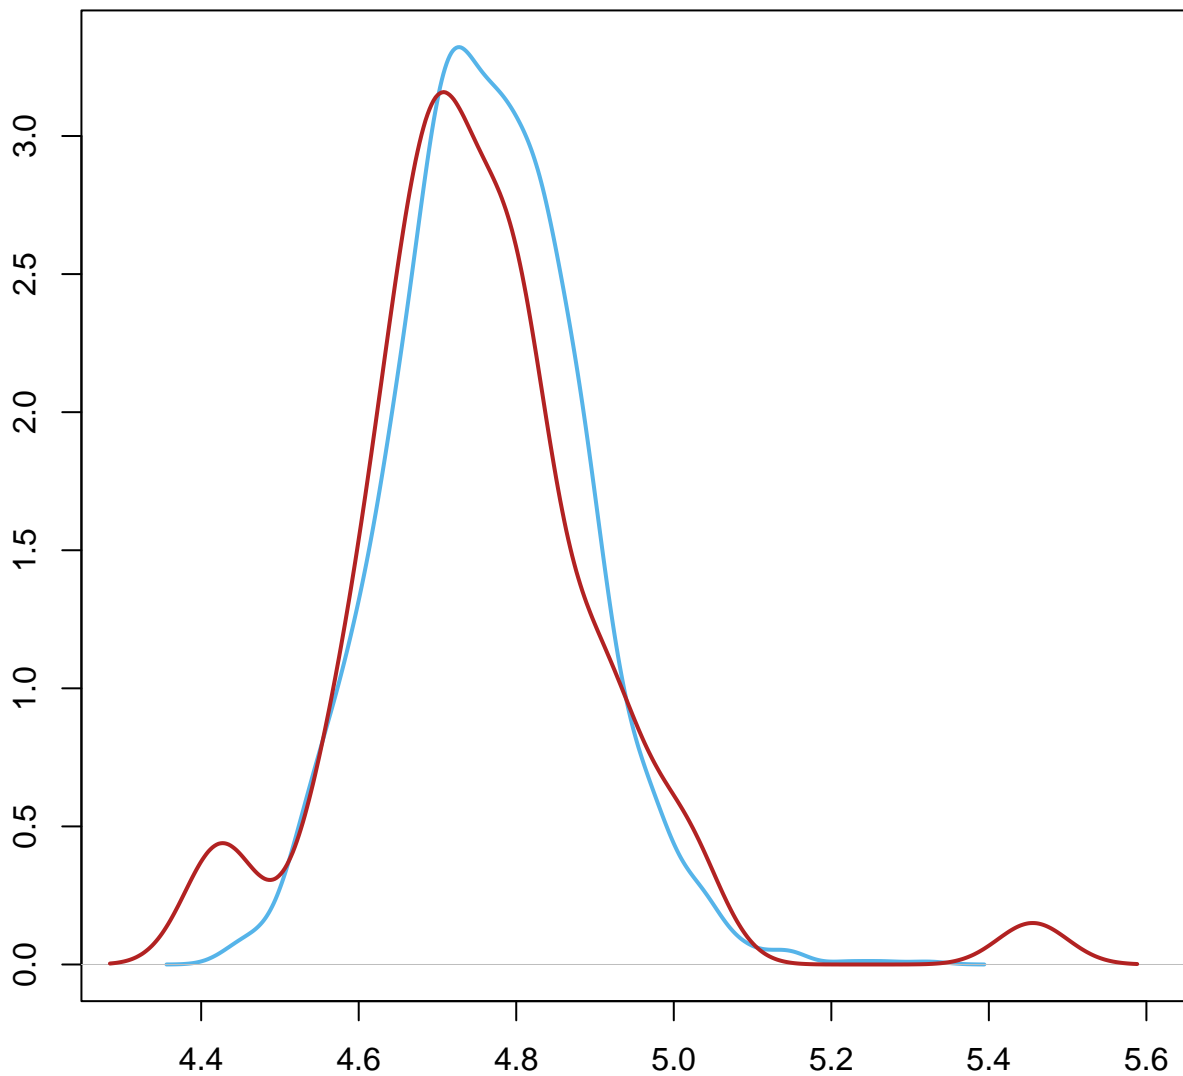

ln\_S

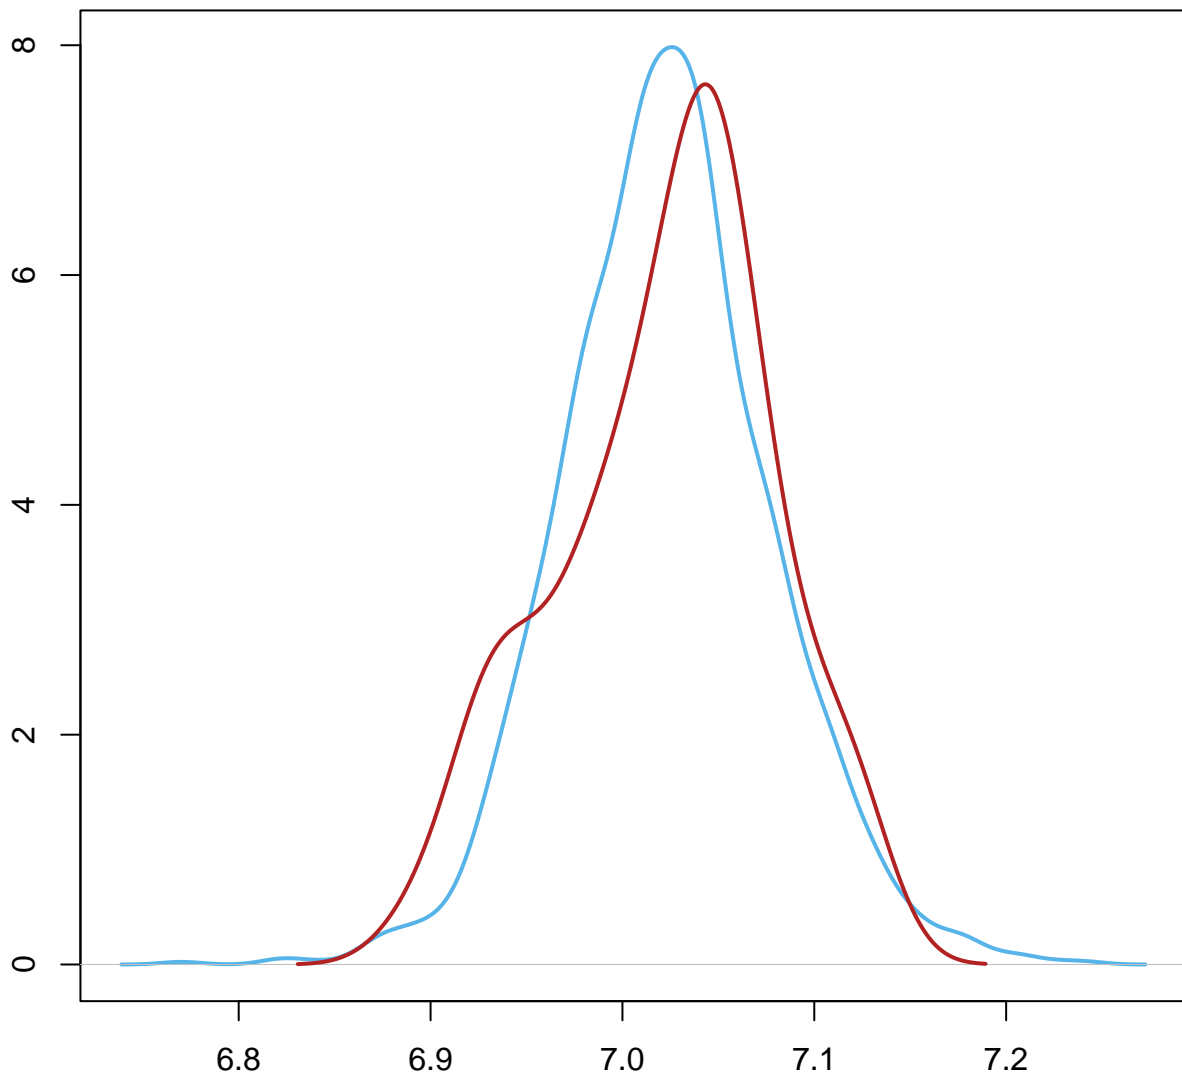

ln\_K

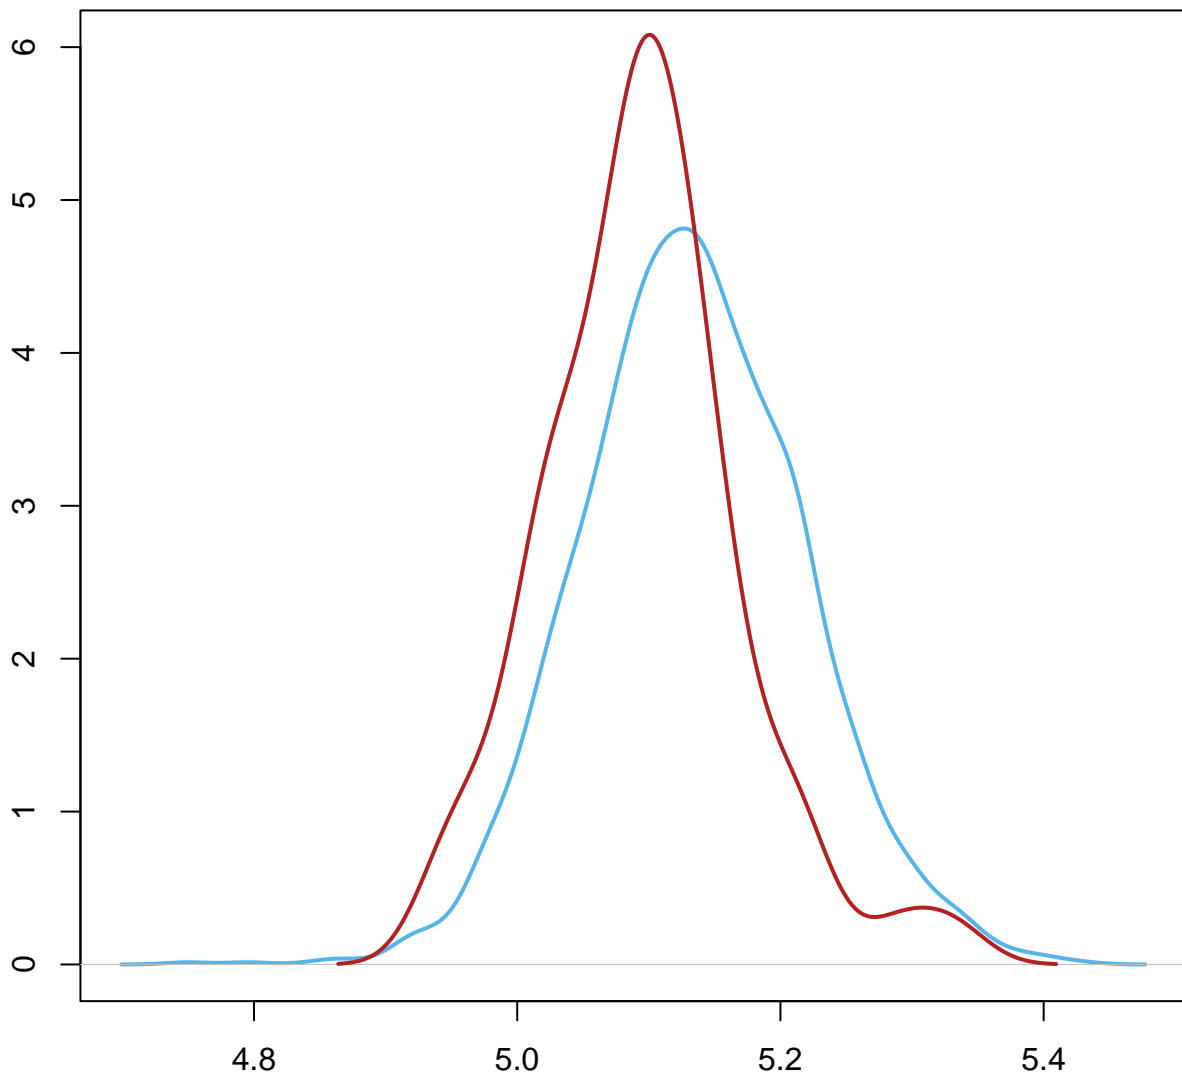

In\_Ca

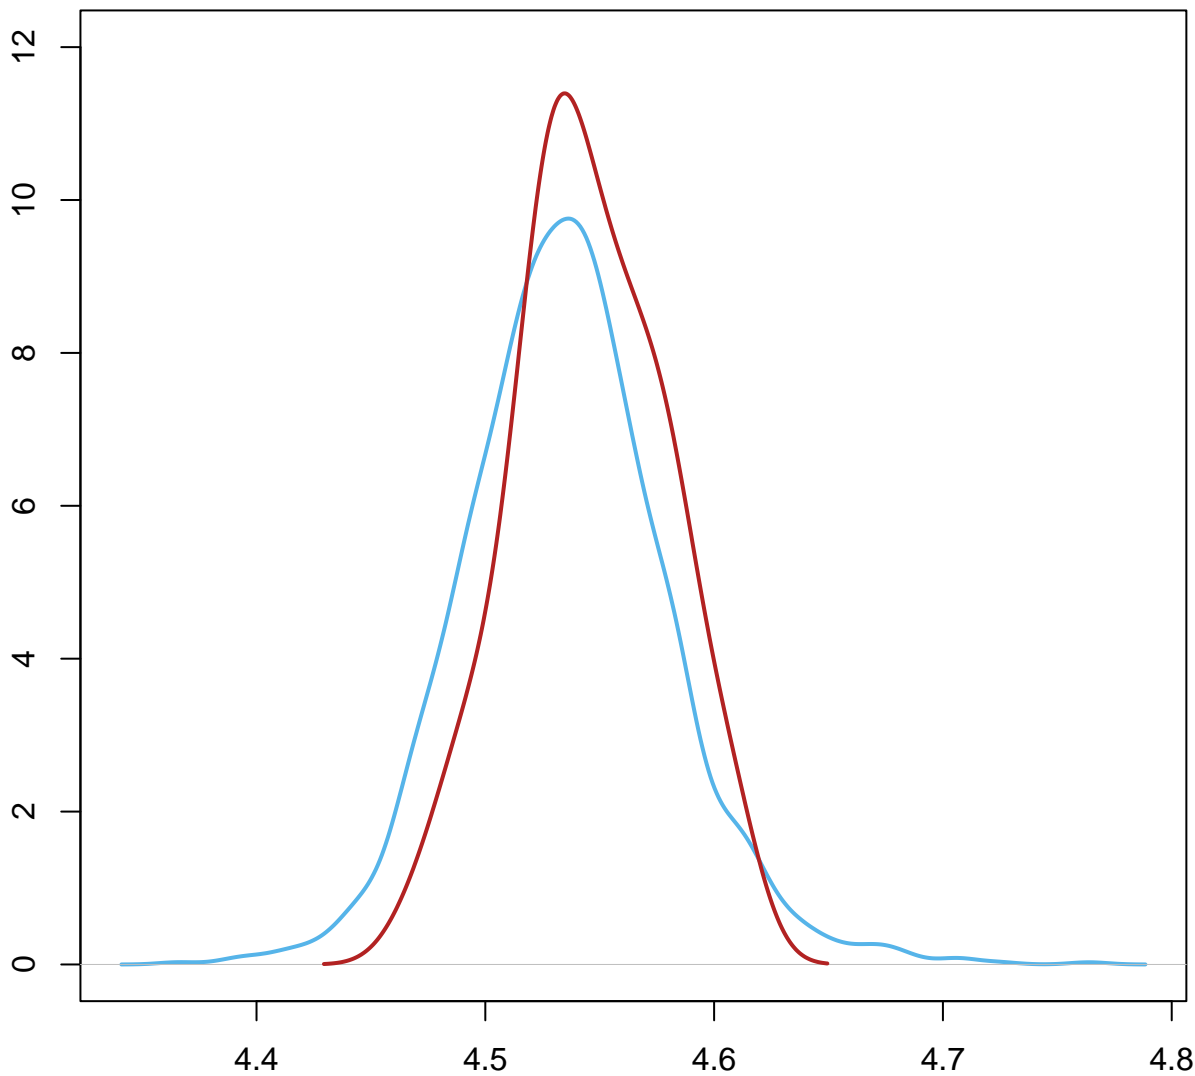

In\_Fe

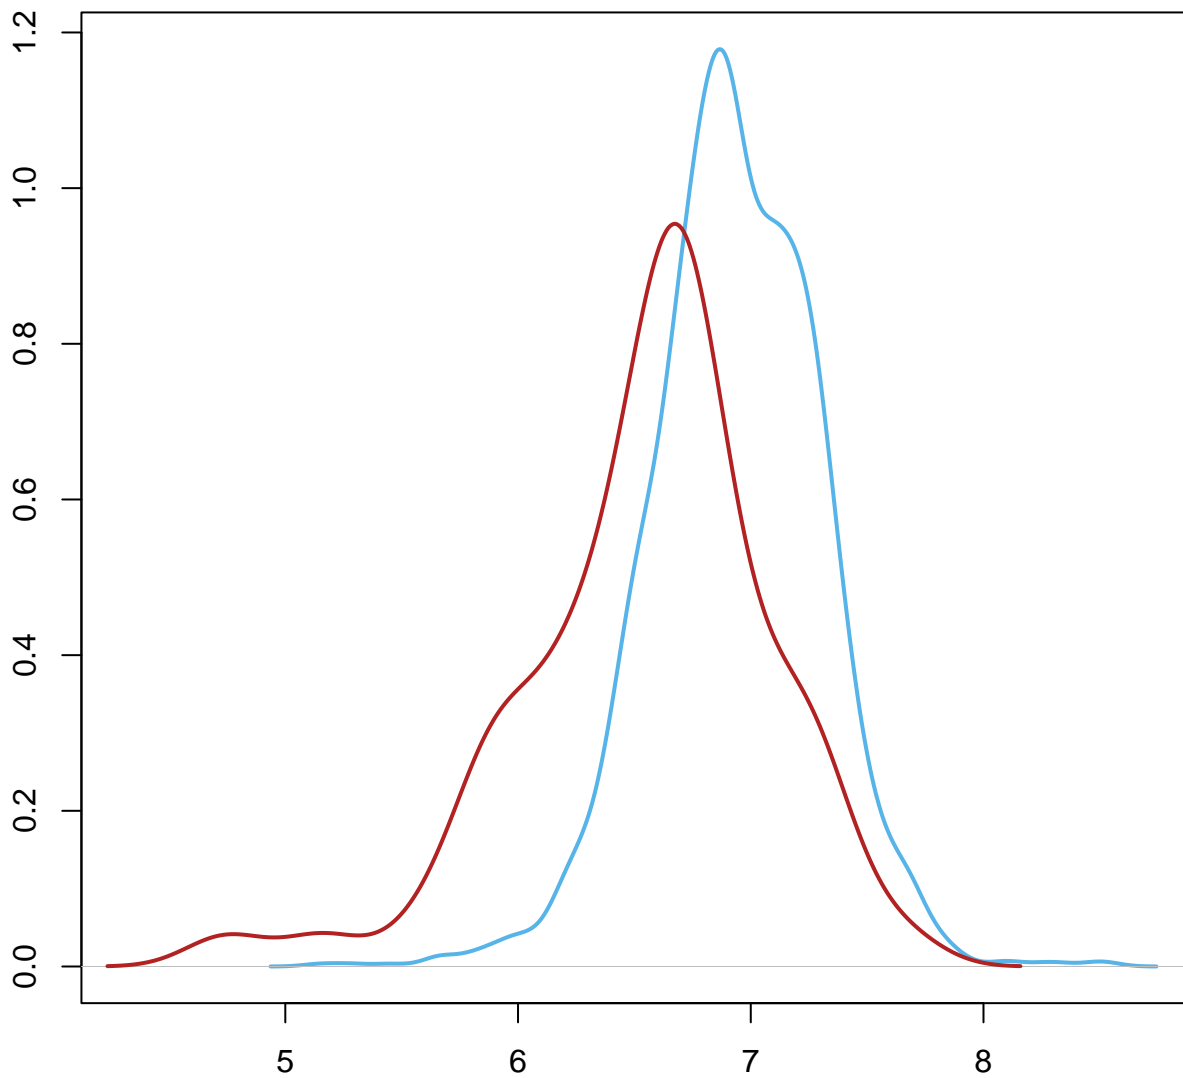

In\_Co

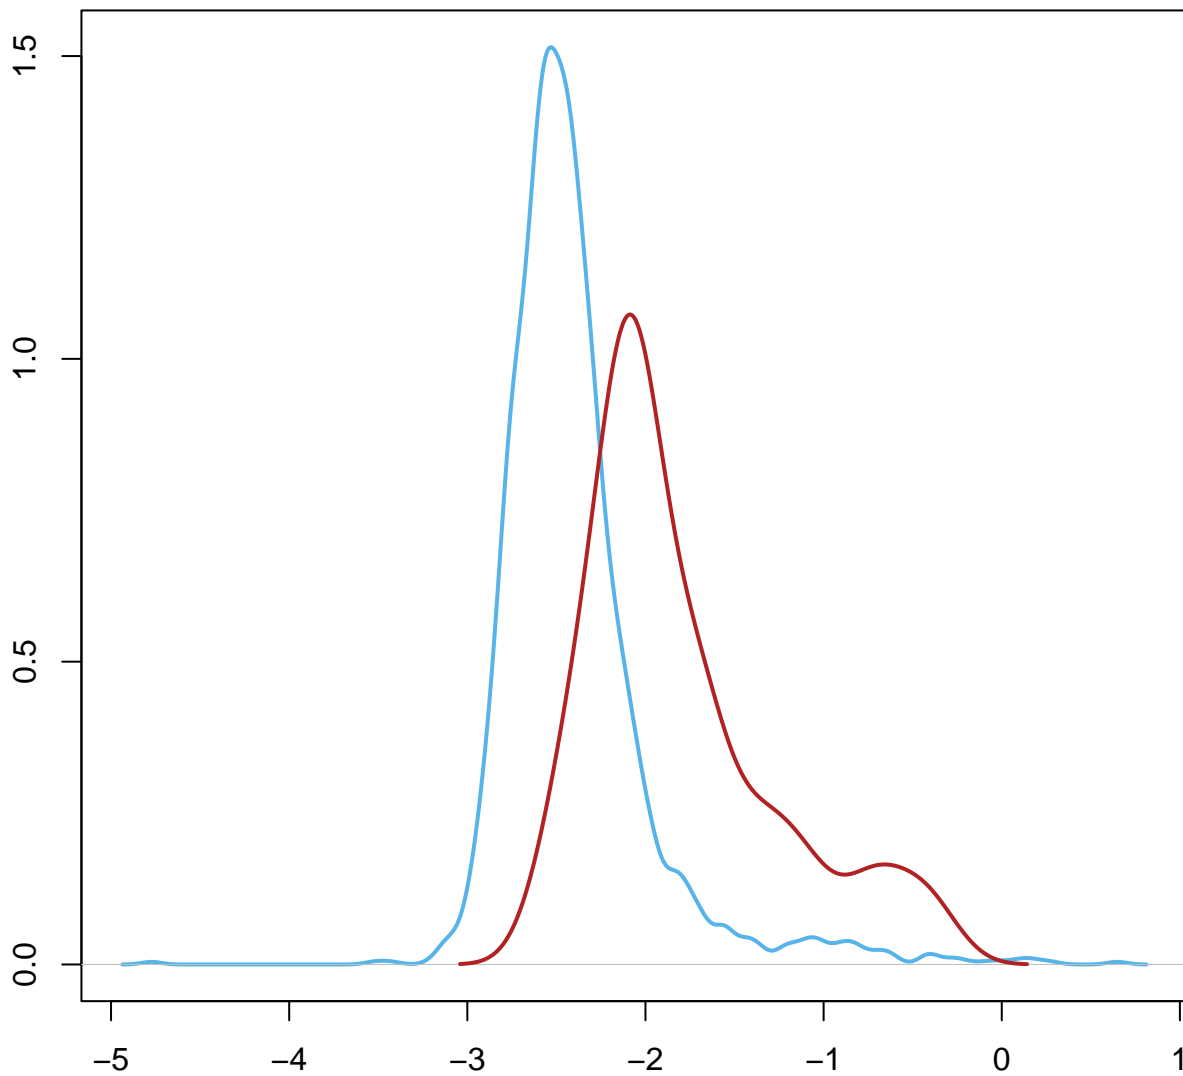



In\_Cu

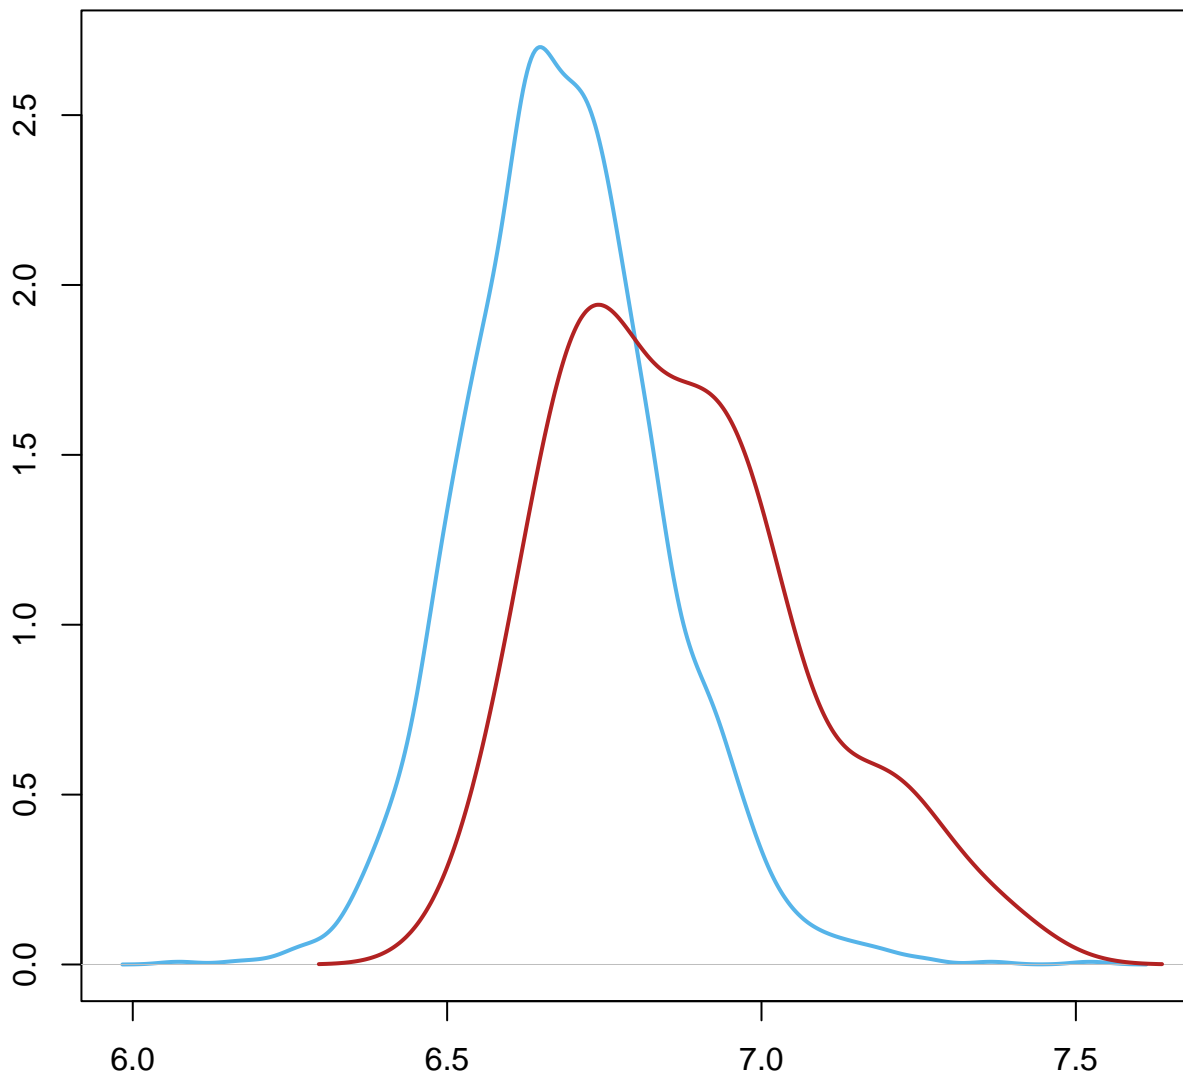

ln\_Zn

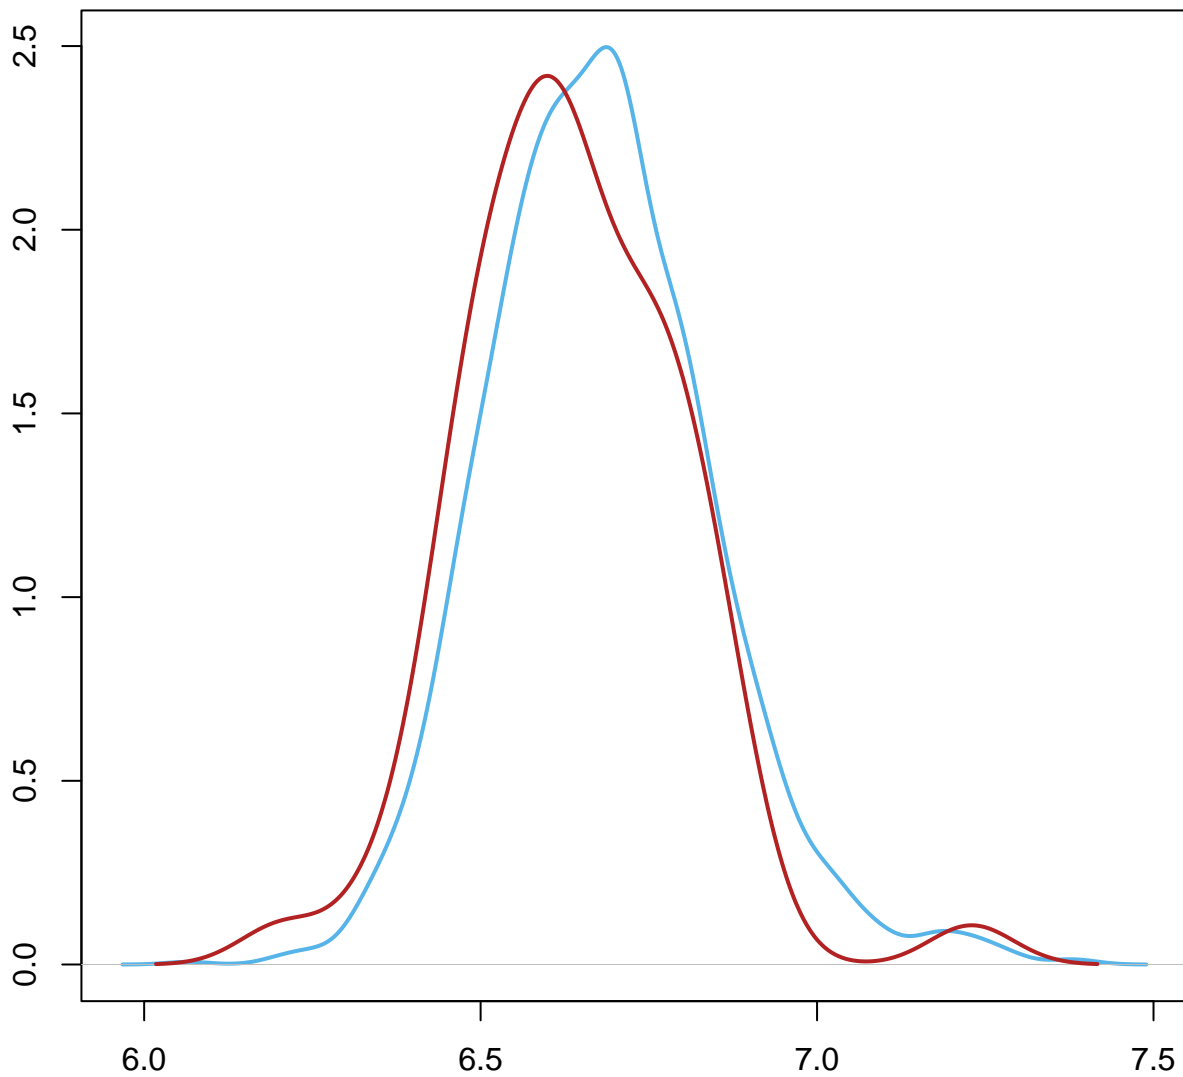

ln\_As

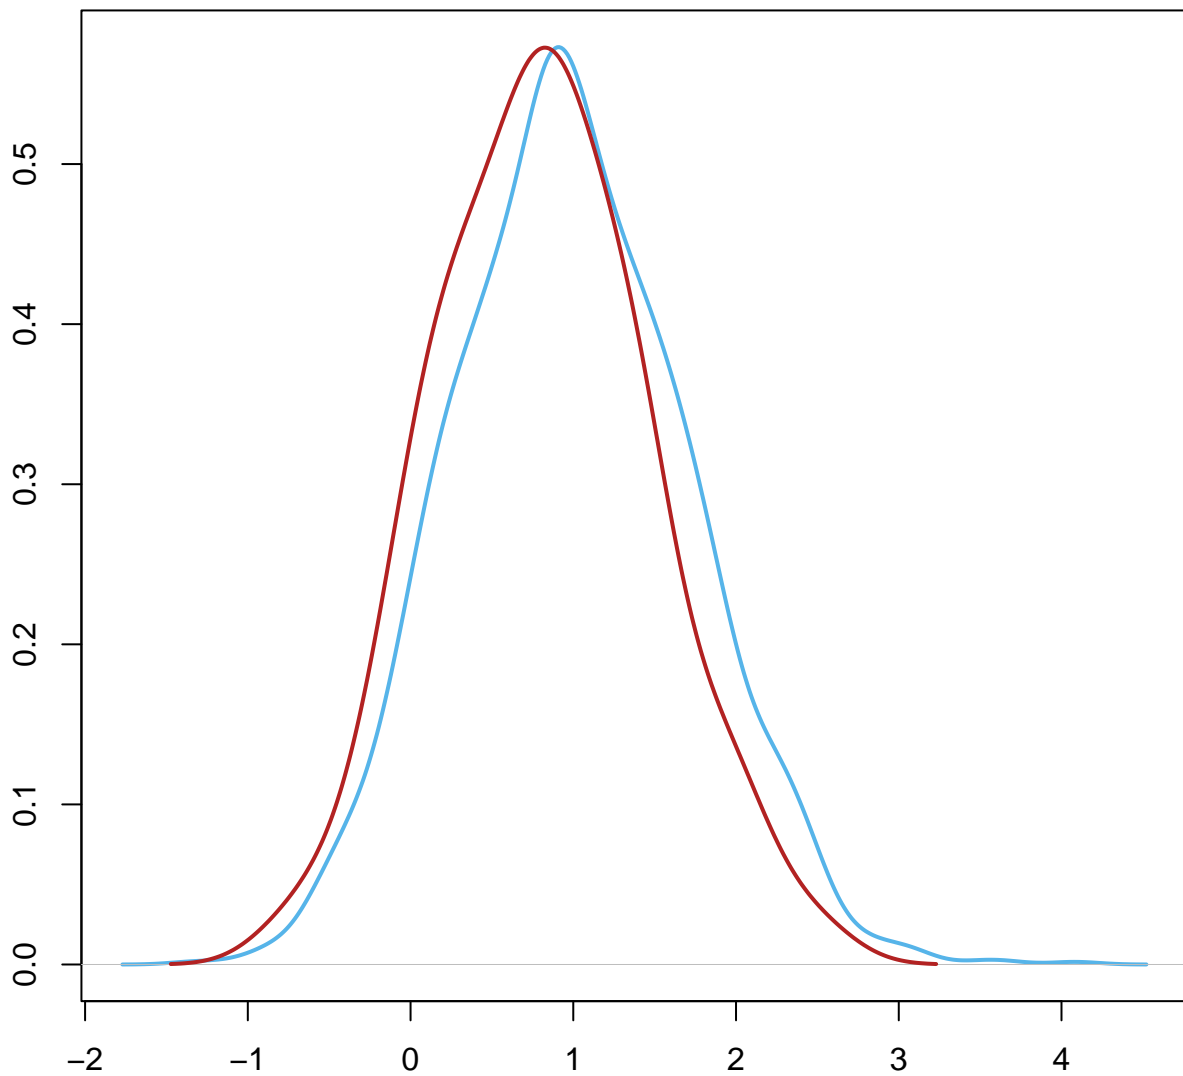

In\_Se

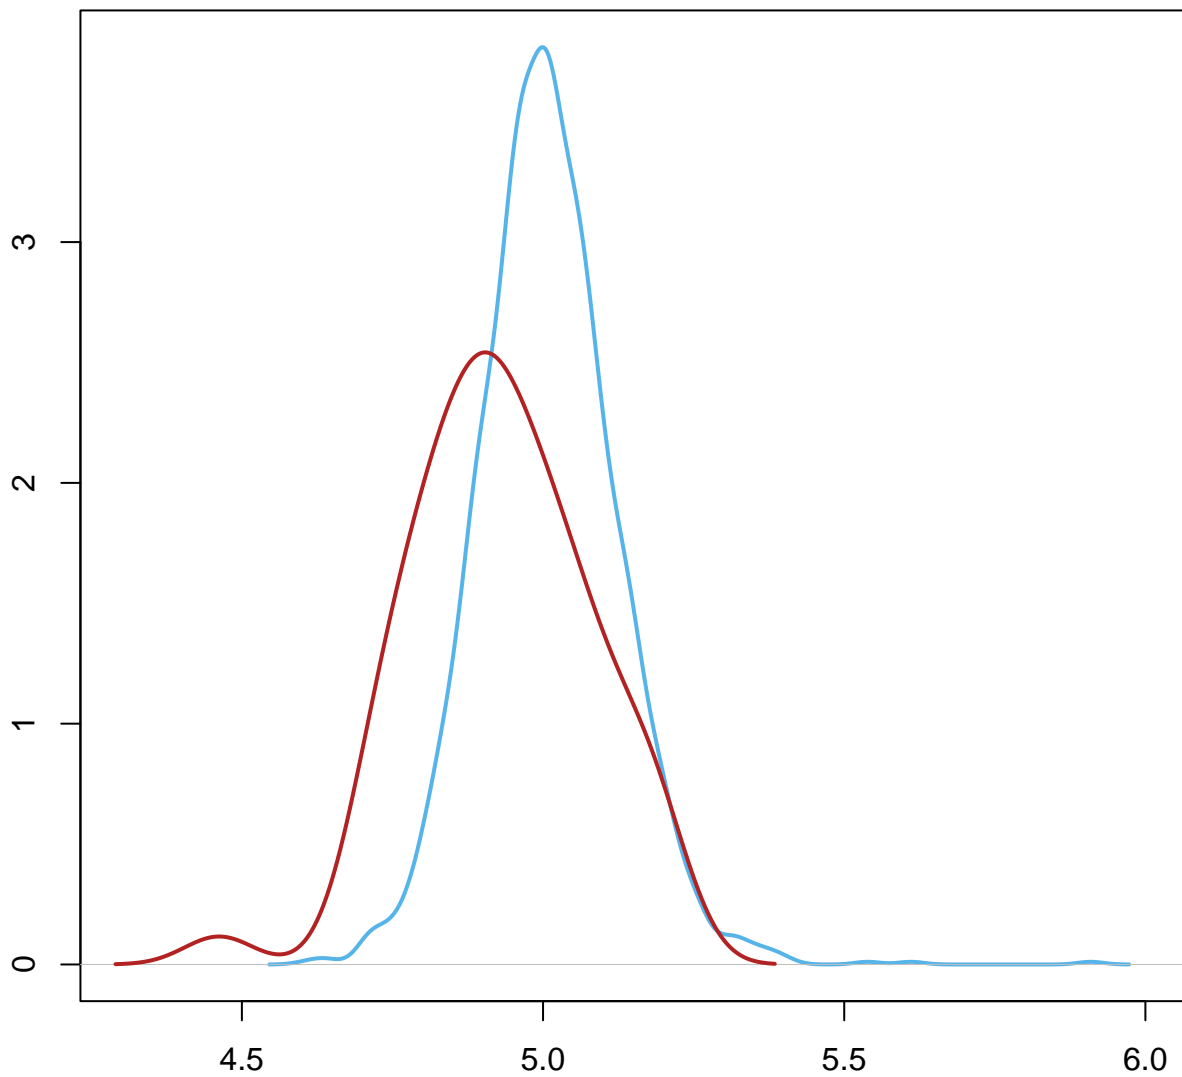

**ln\_Rb**

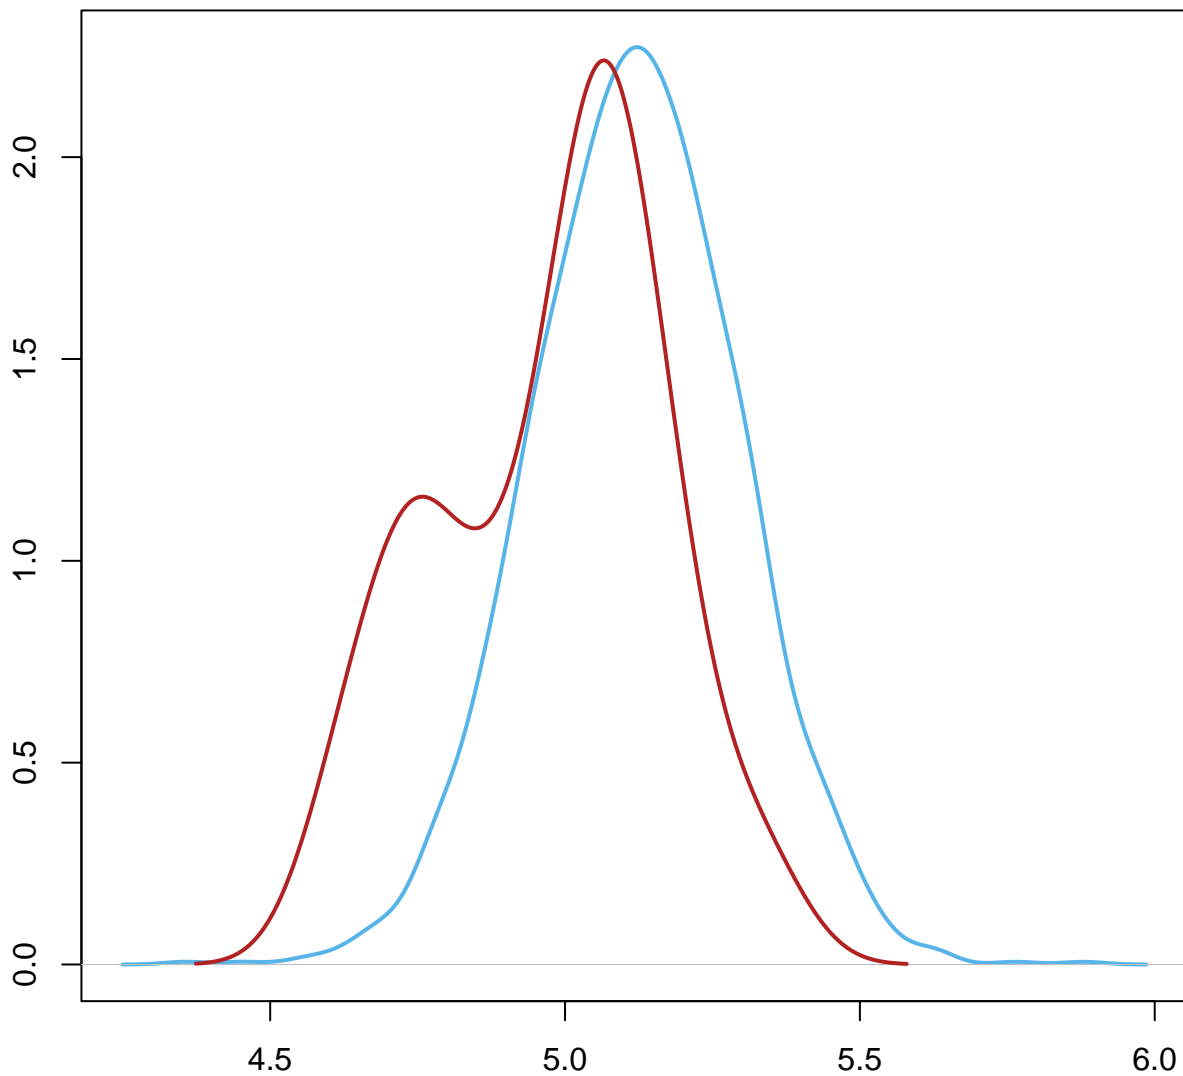

ln\_Sr

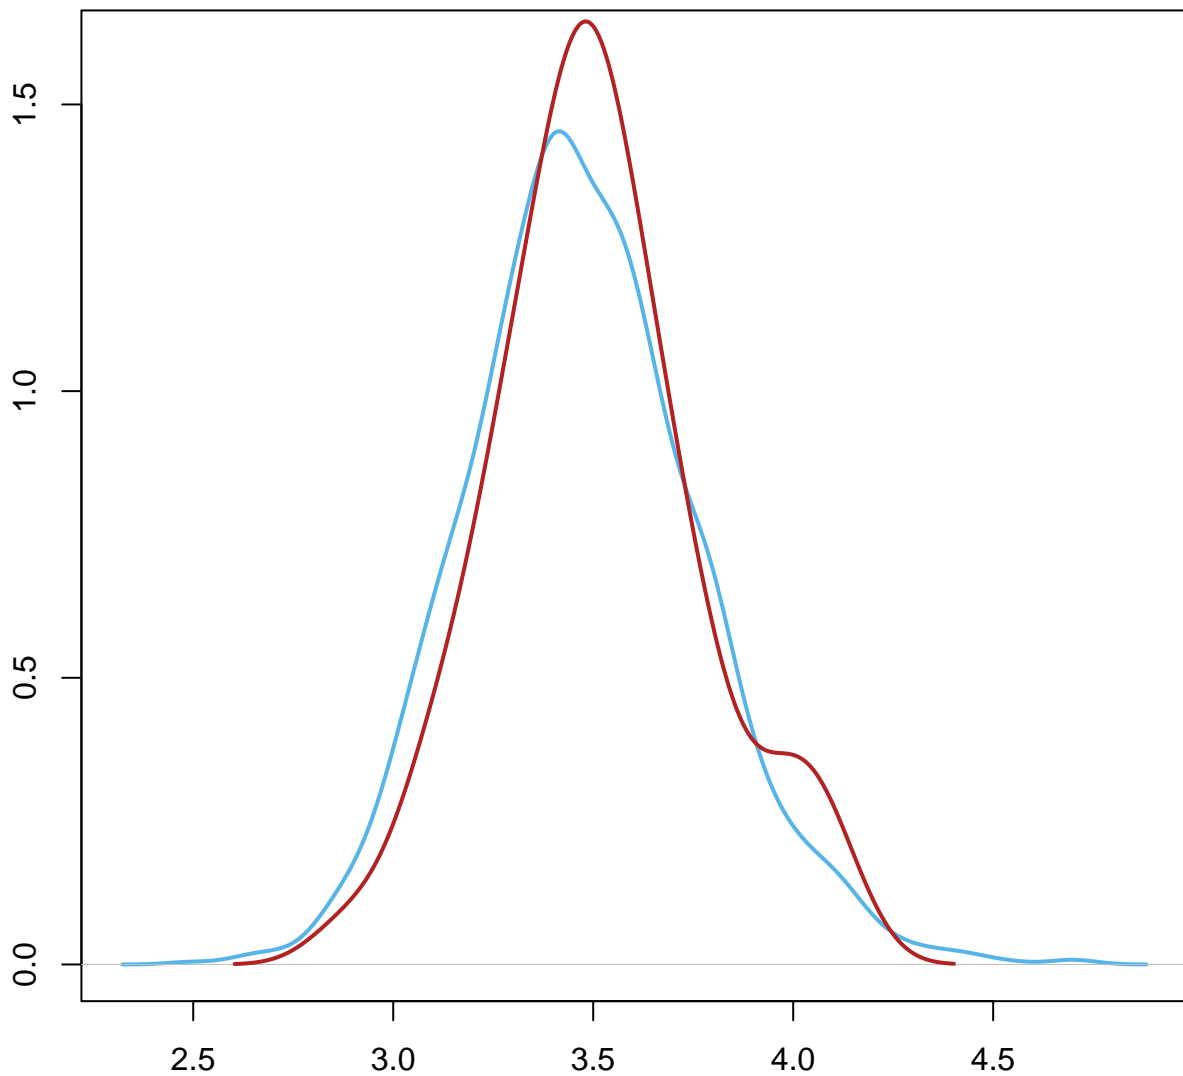

In\_Mo

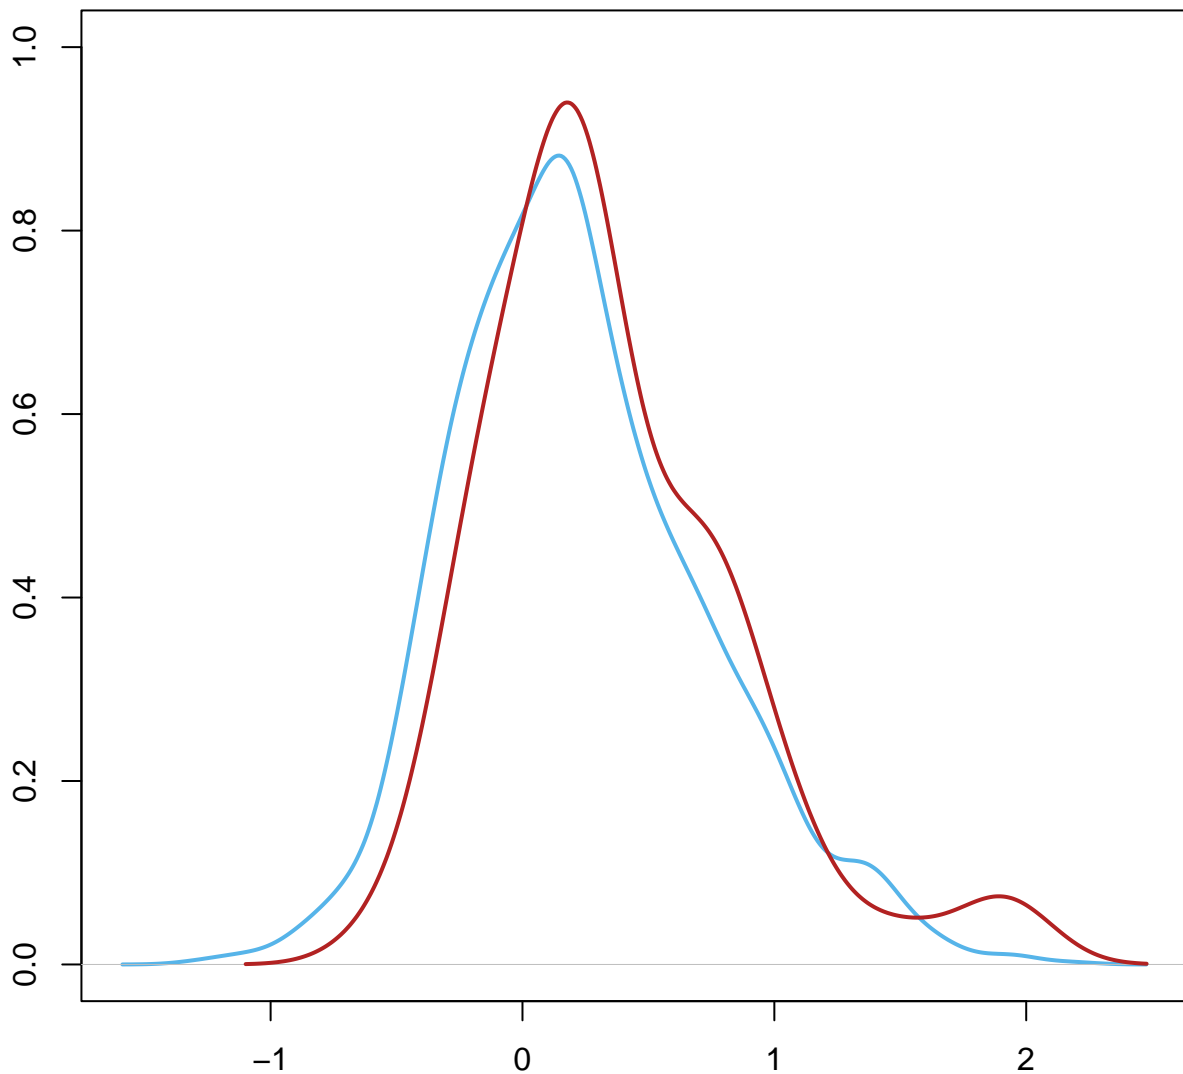

In\_Ag

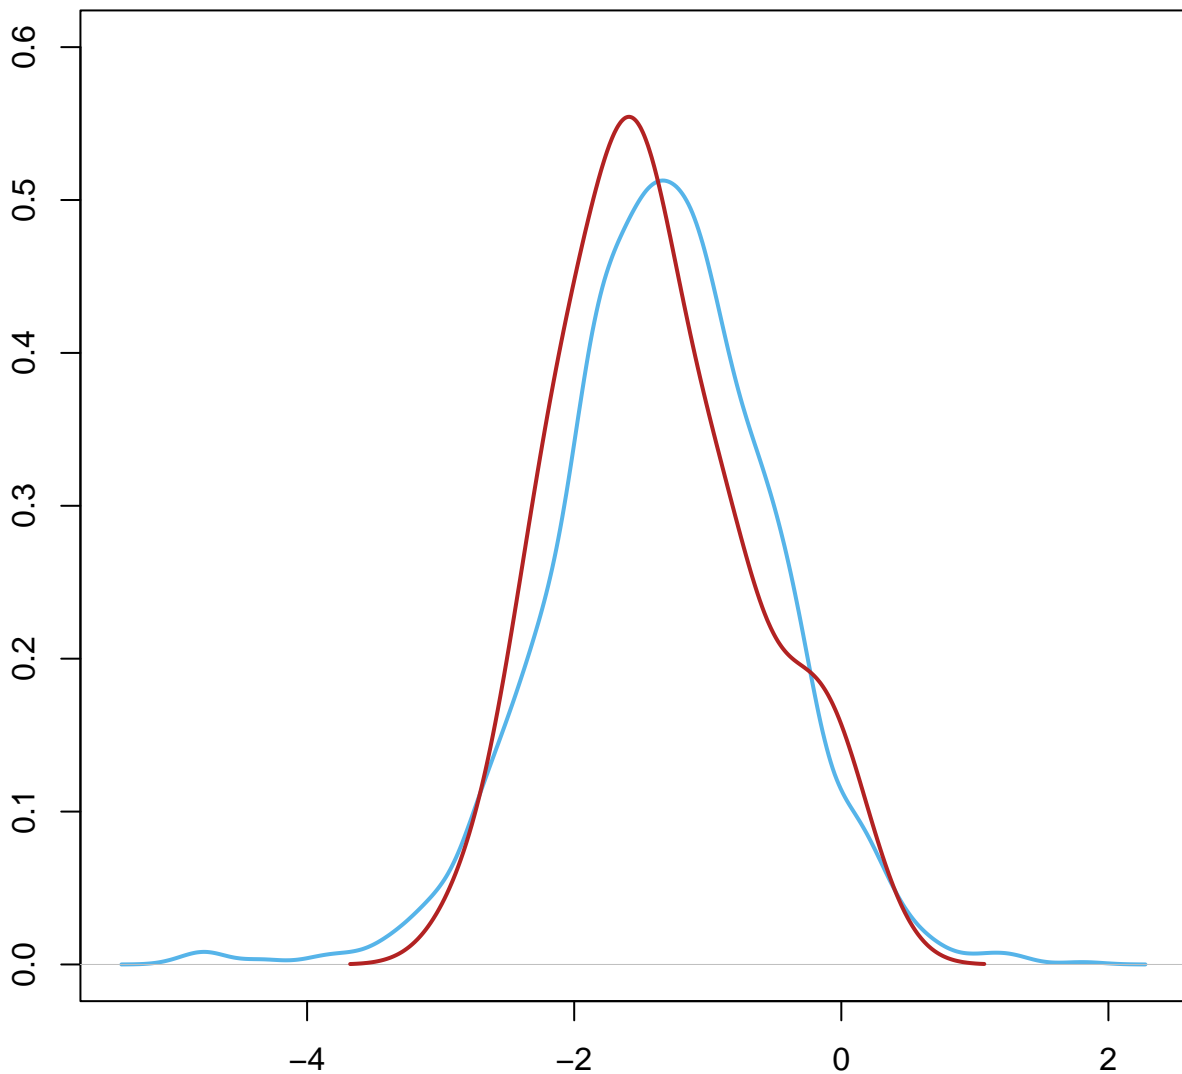



ln\_Cs

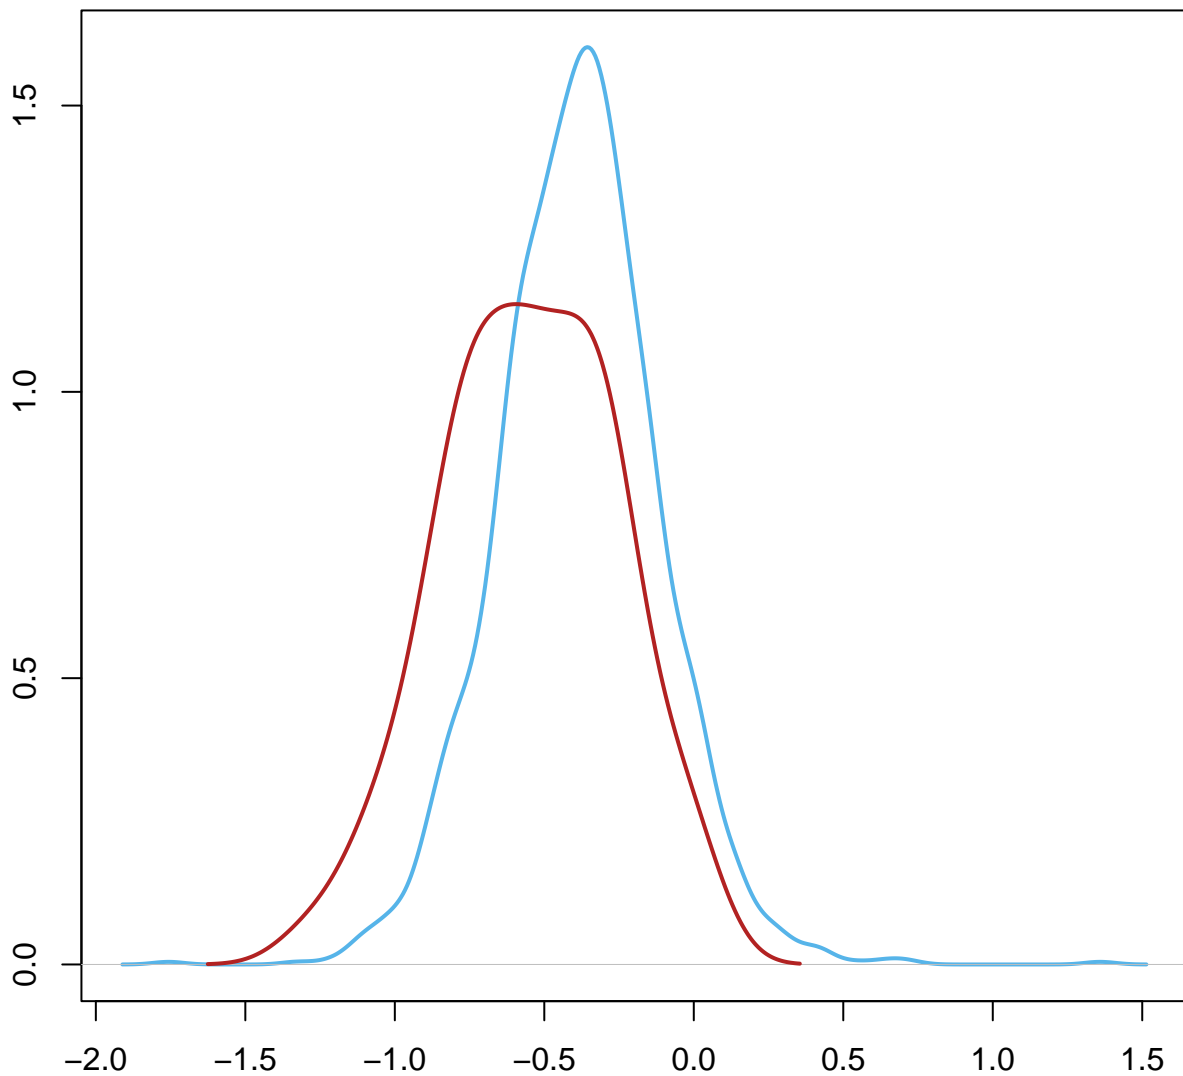

Supplement: Supporting_Figure_1.zip [file Supporting_Figure_1.zip]

In\_Na

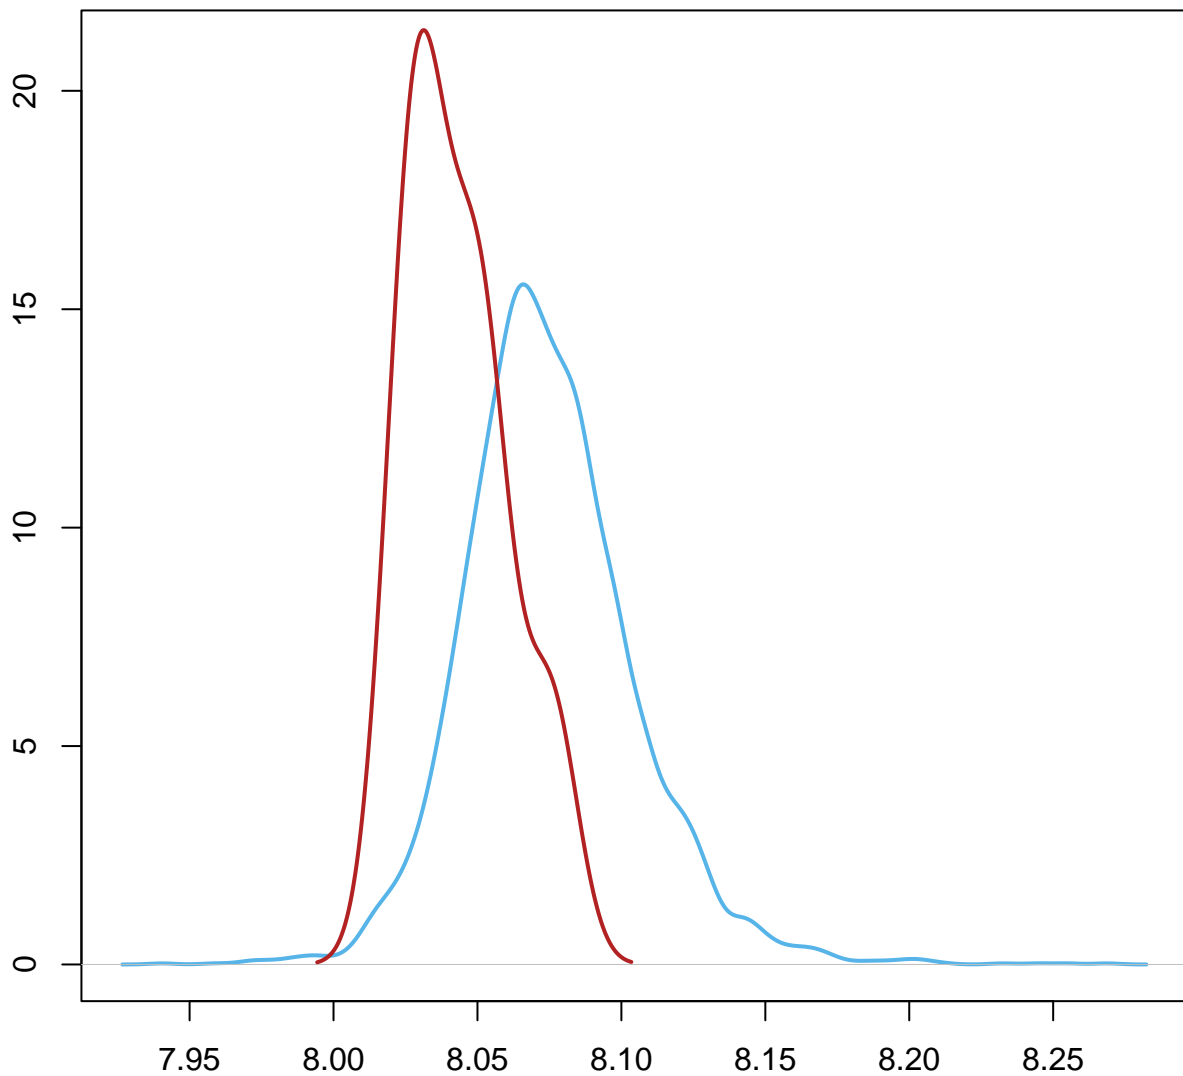

ln\_Mg

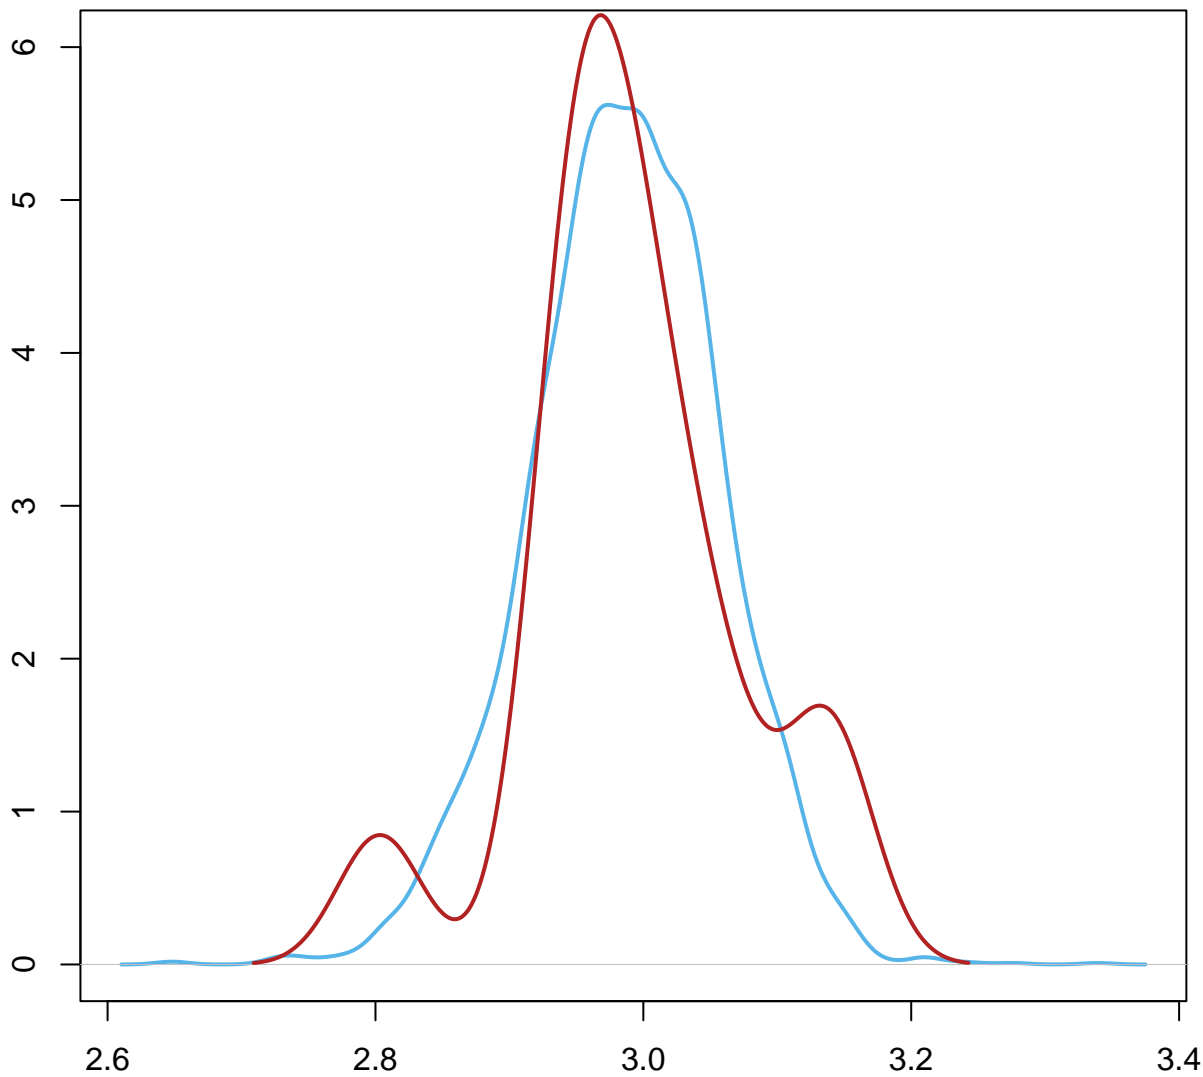

ln\_P

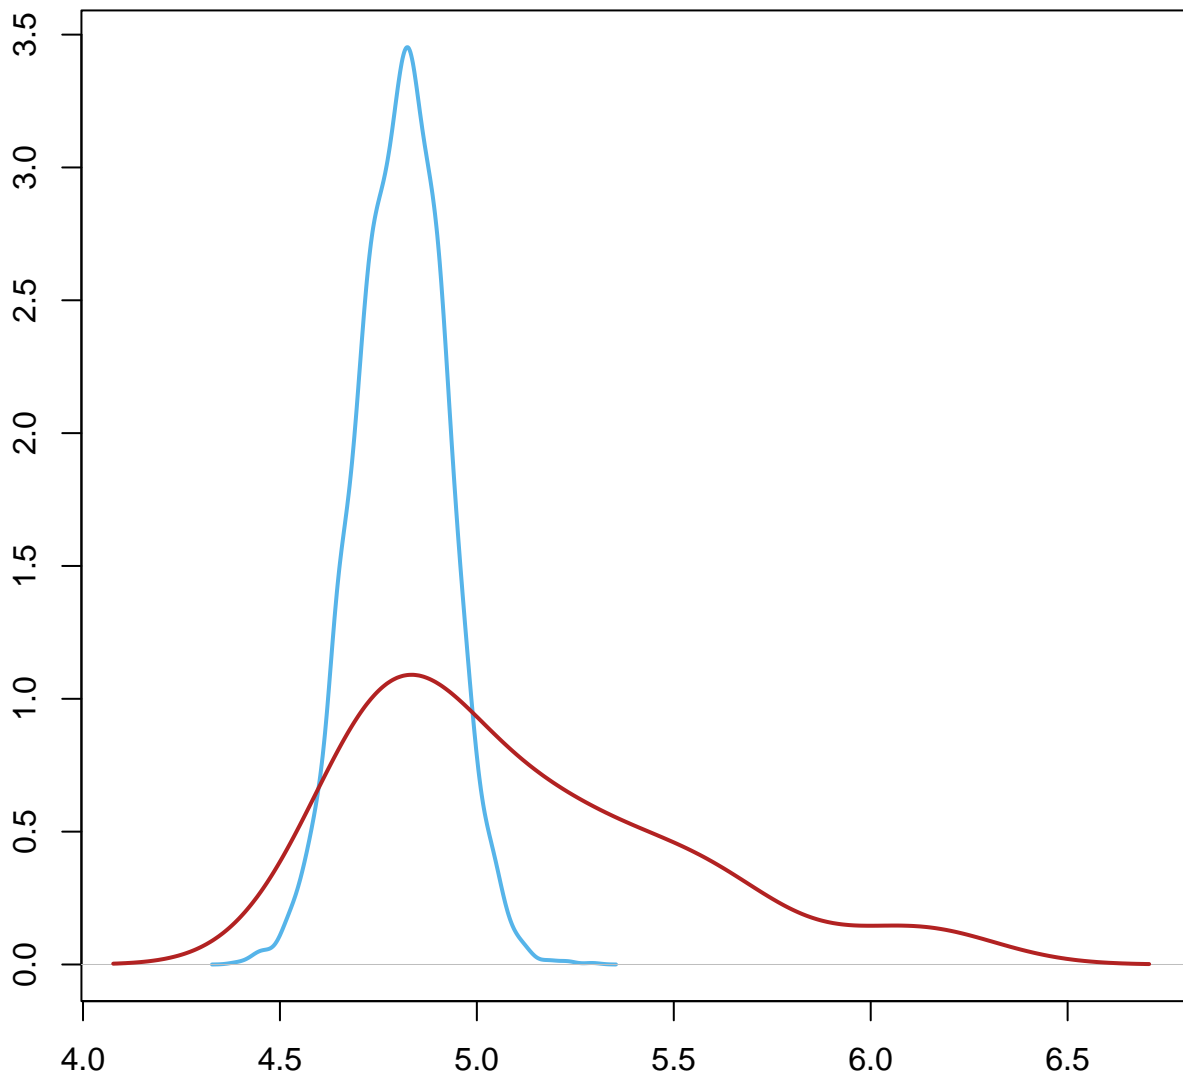

$\ln_S$

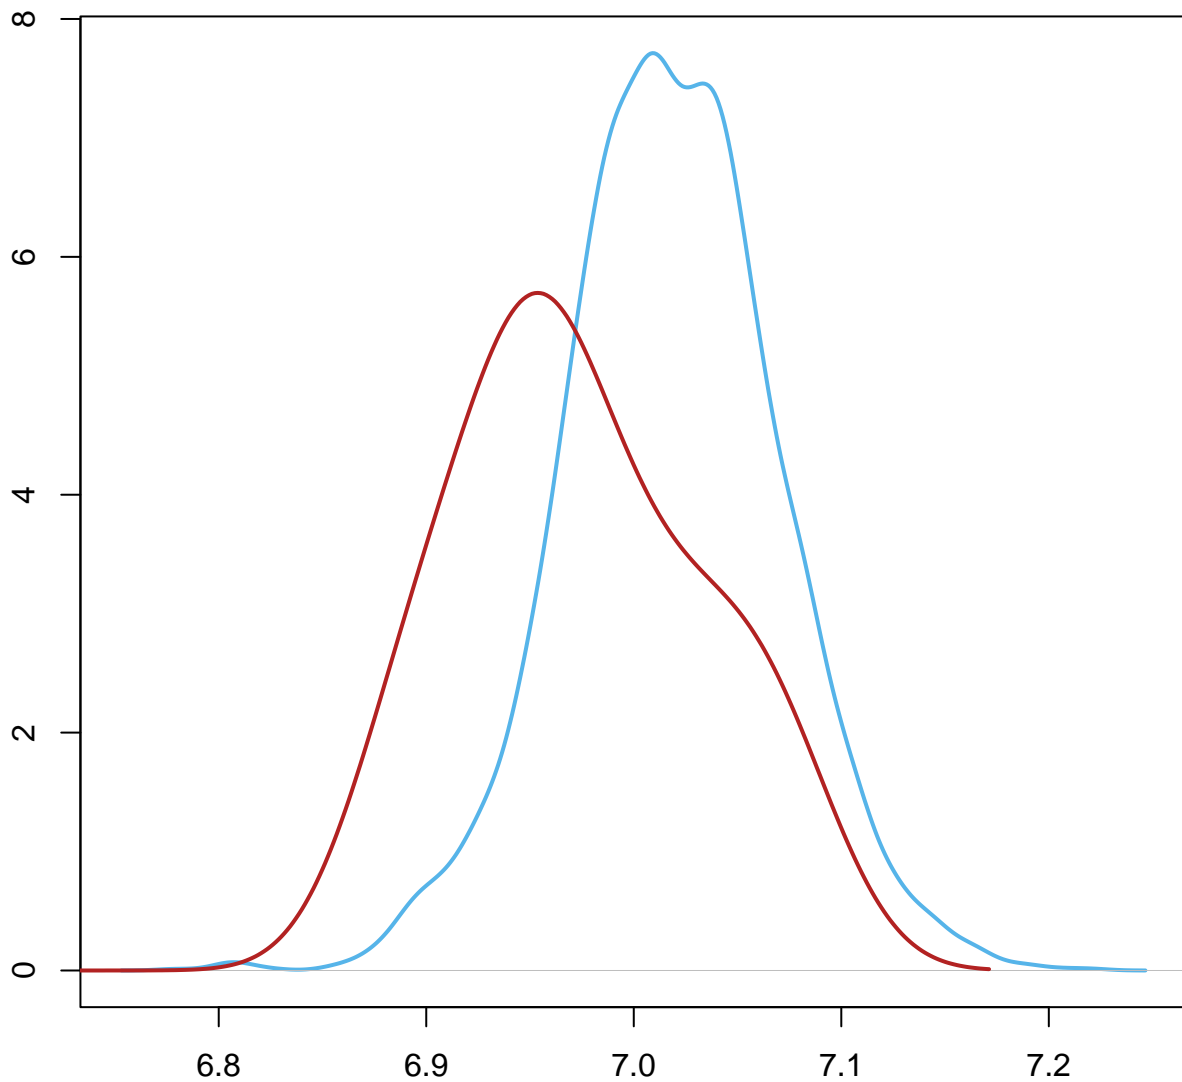

ln\_K

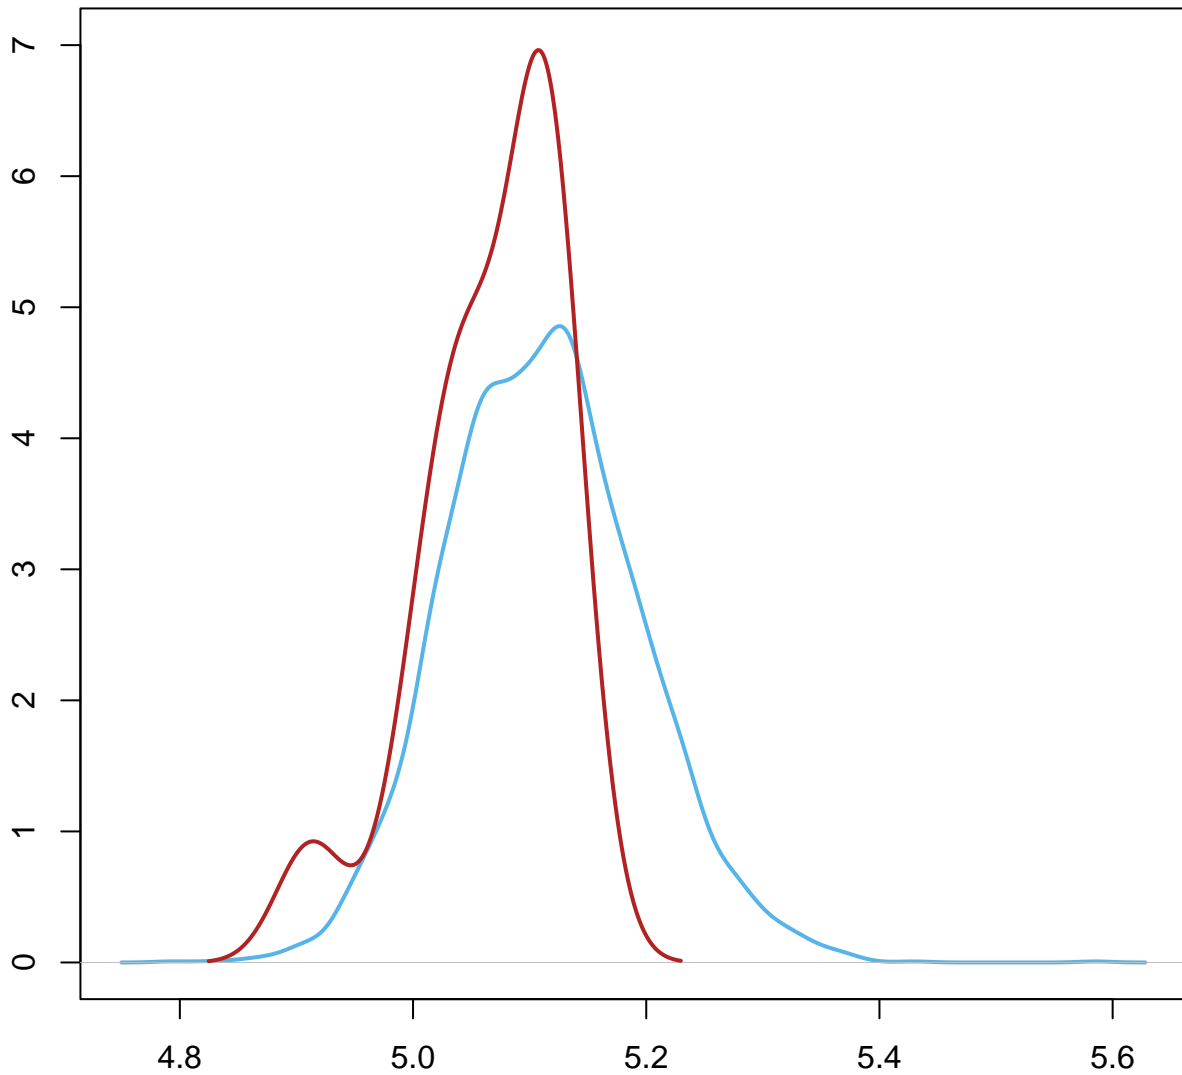

In\_Ca

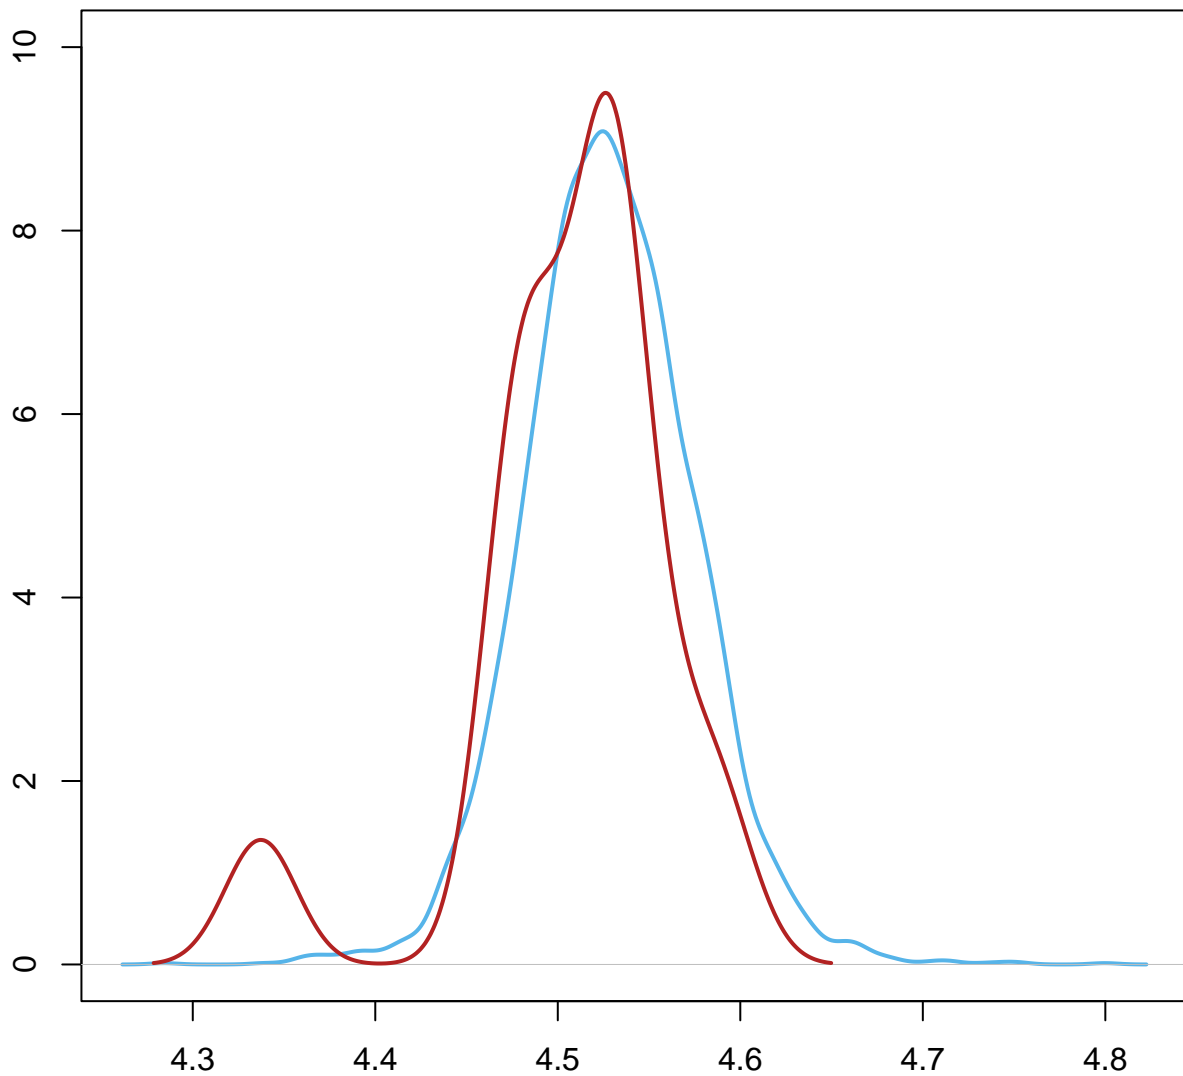

**In\_Fe**

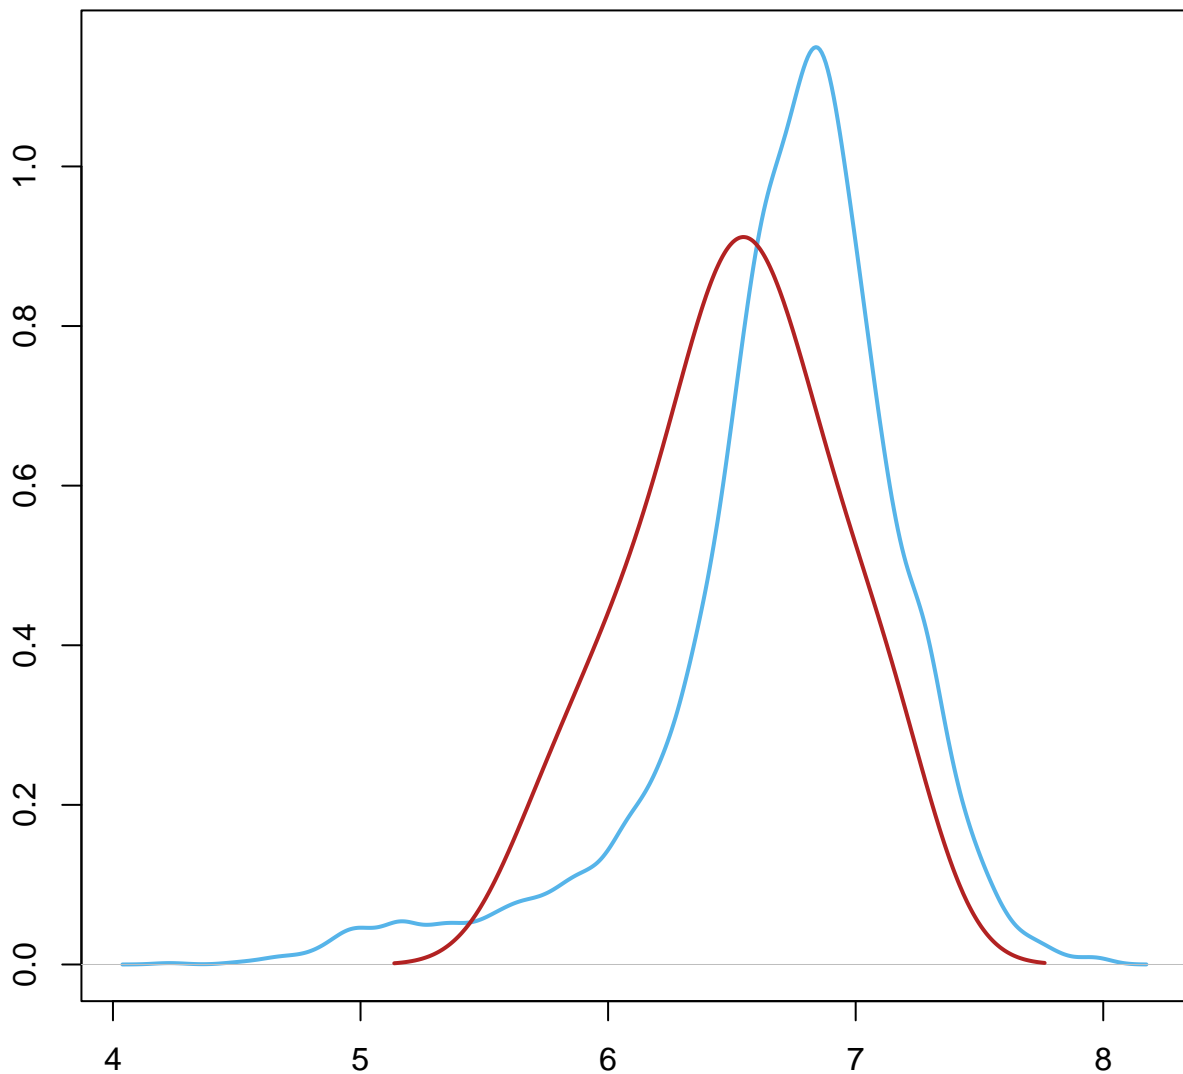

In\_Co

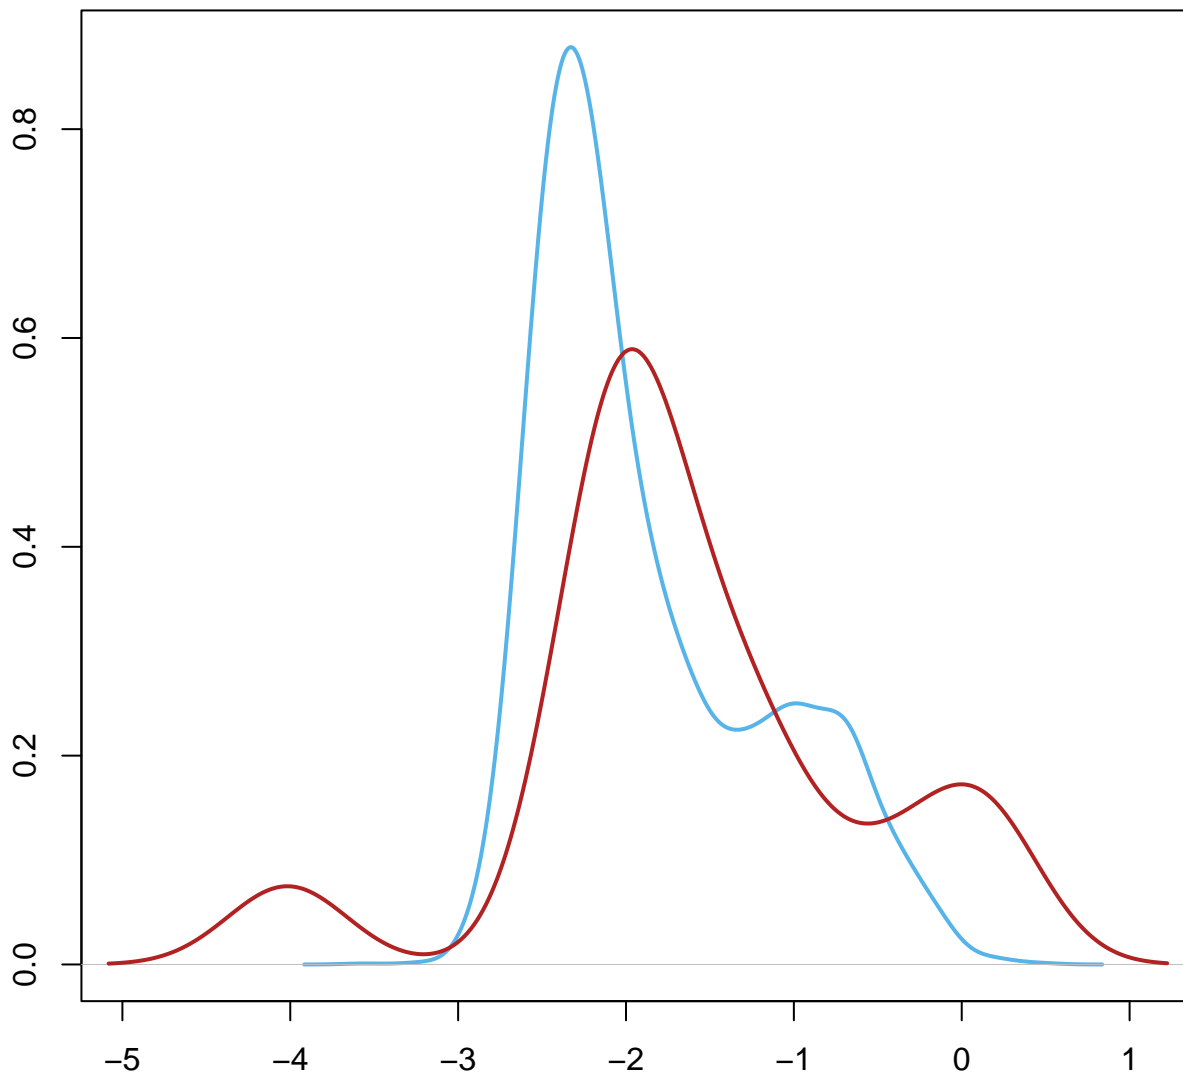



In\_Cu

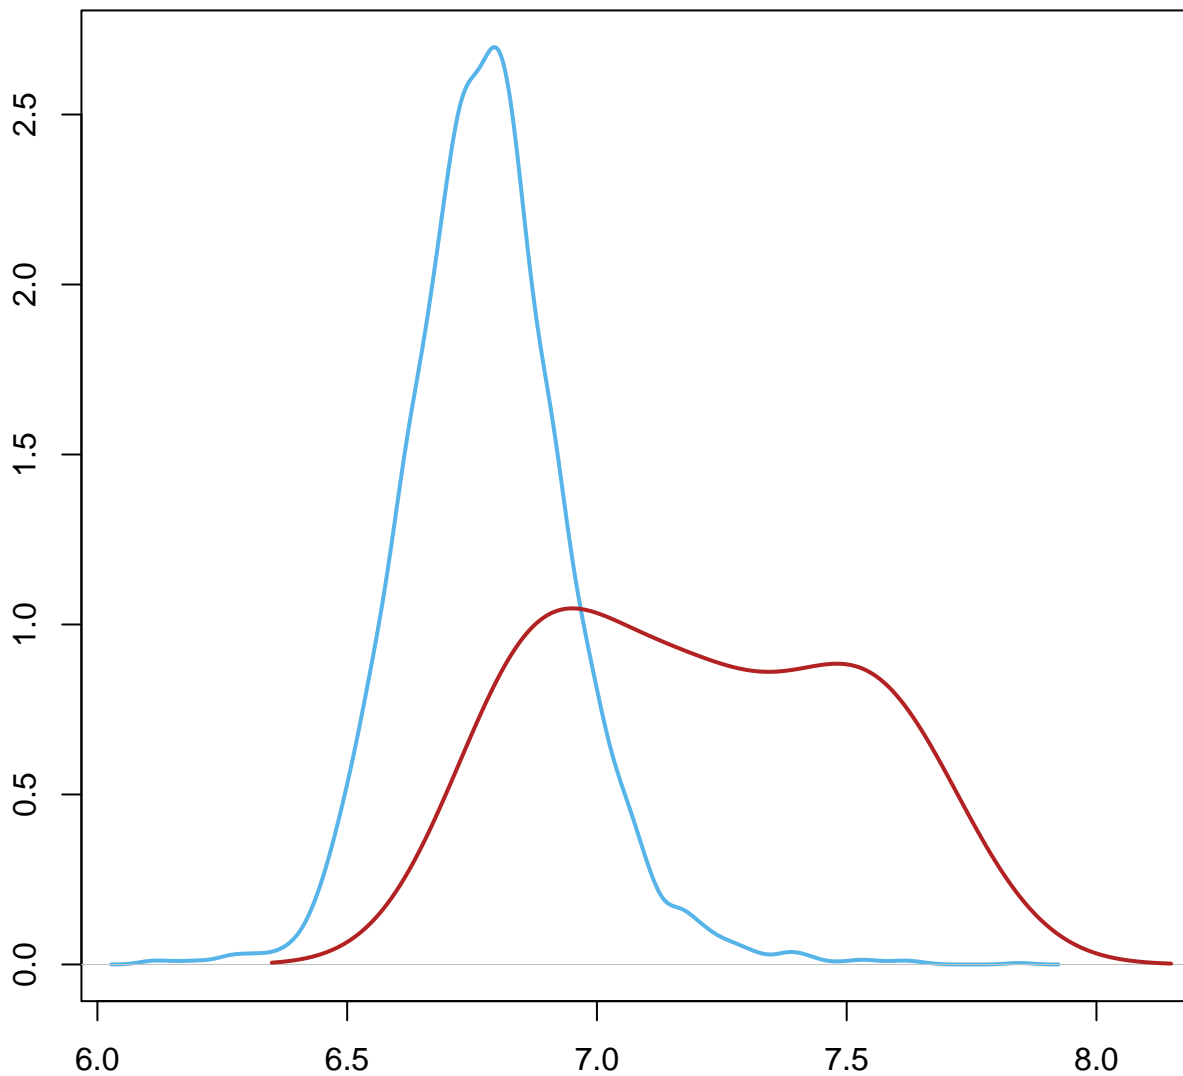

ln\_Zn

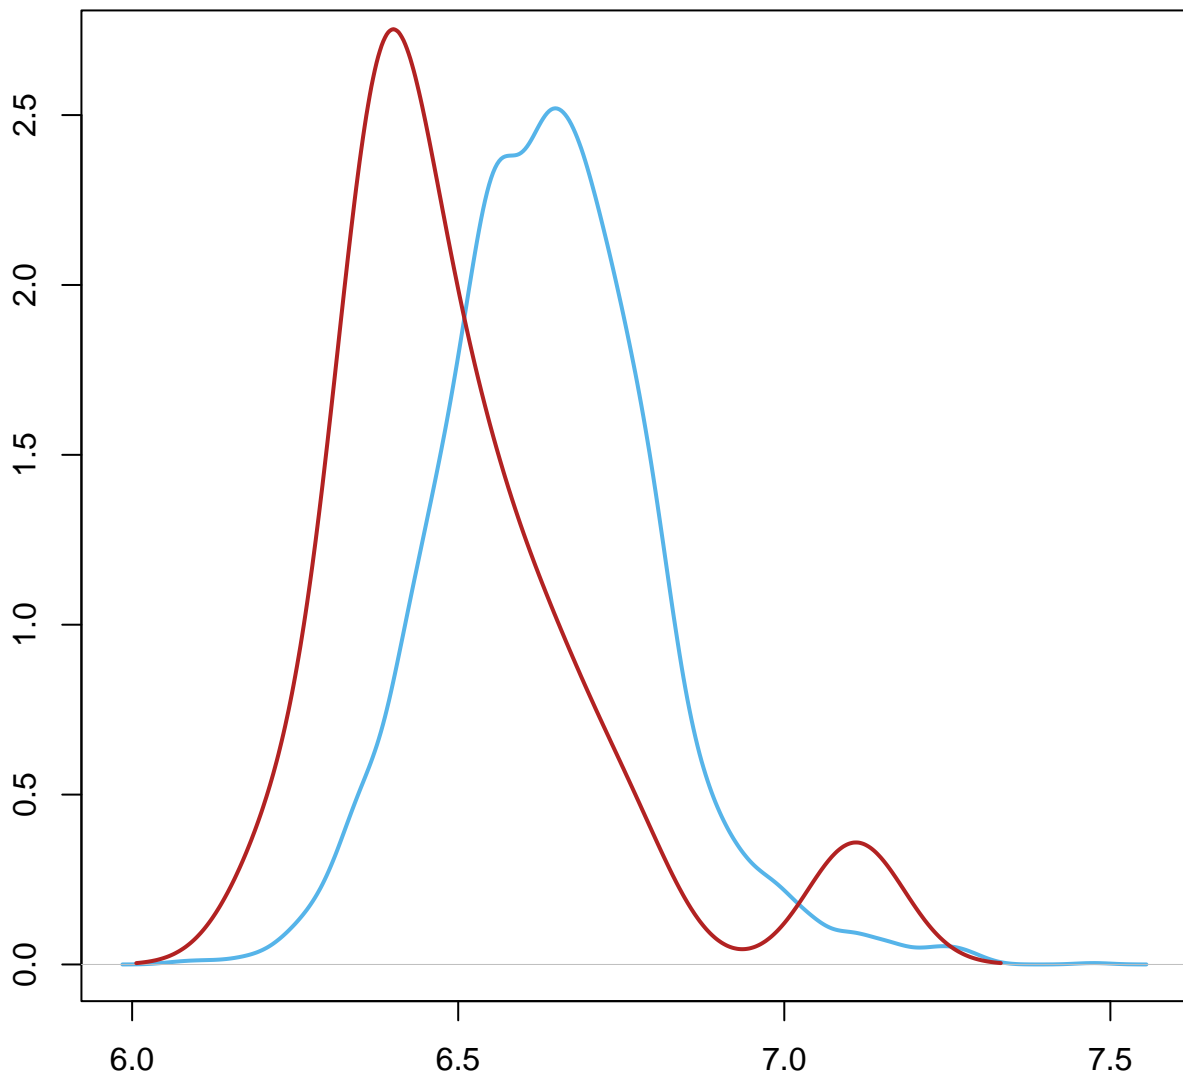

ln\_As

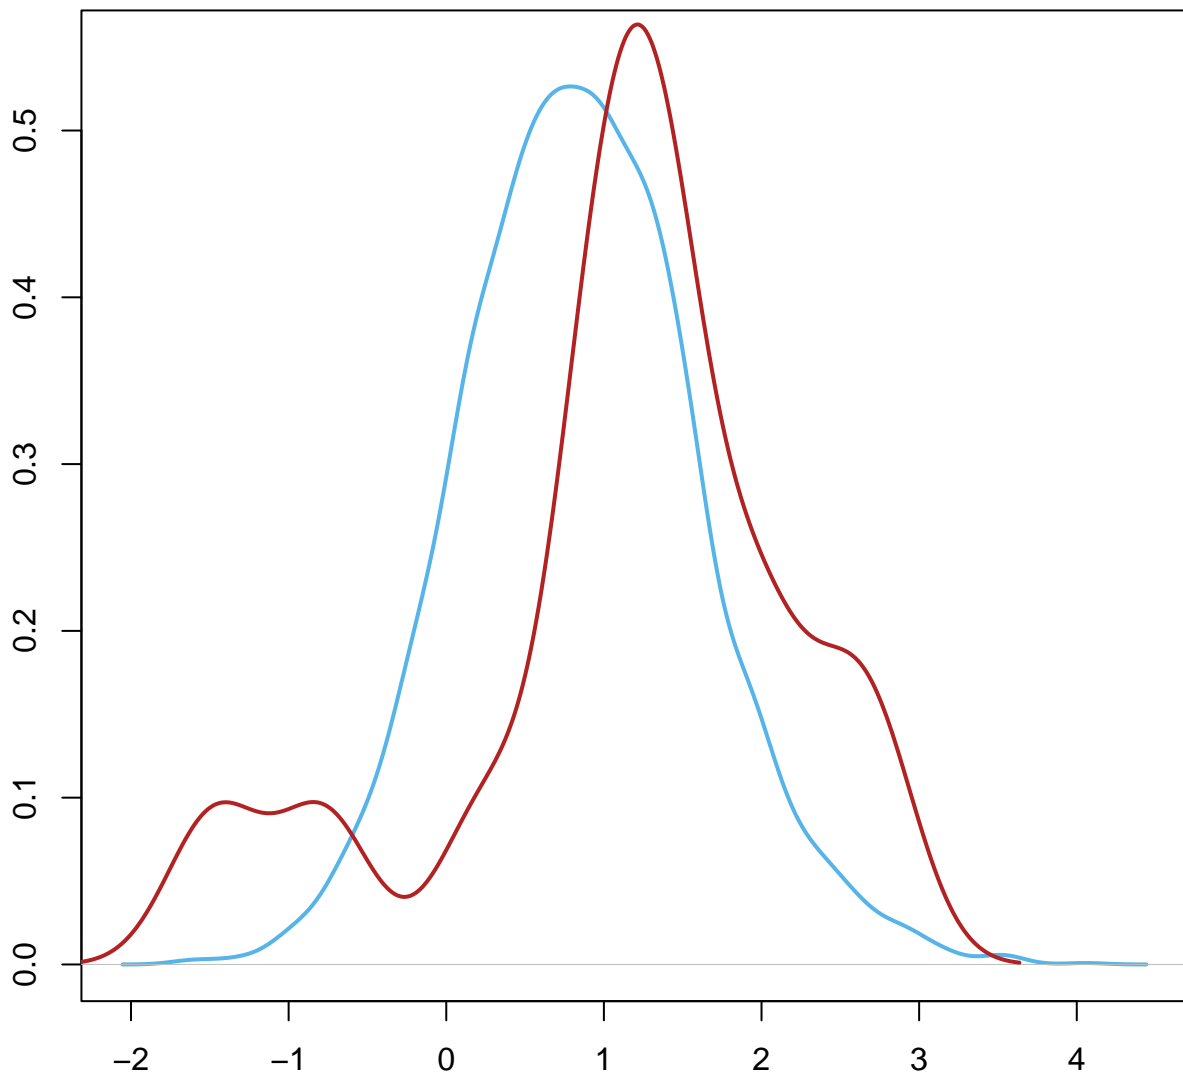

In\_Se

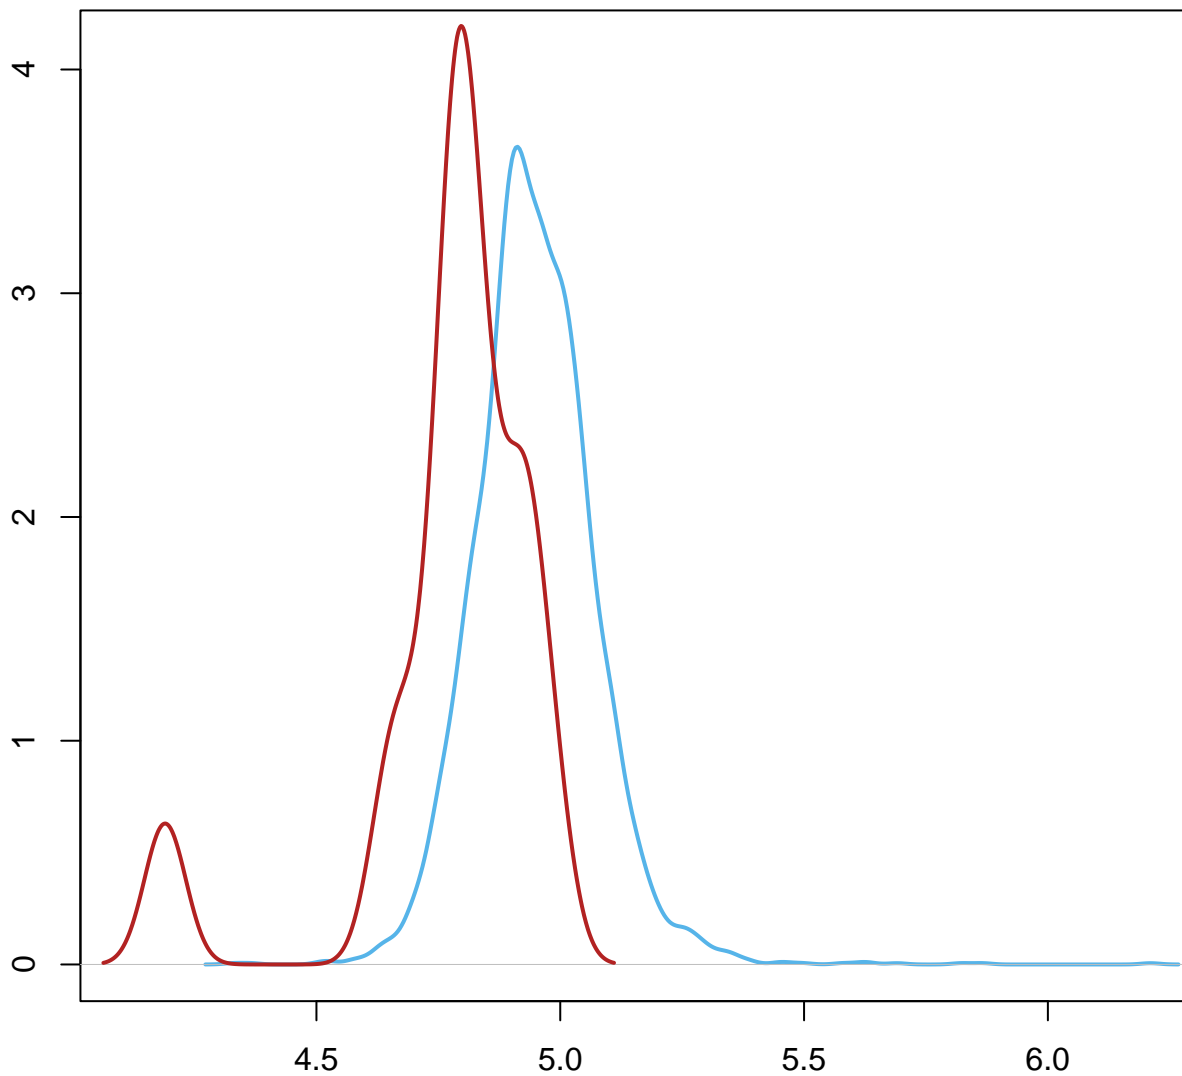

ln\_Rb

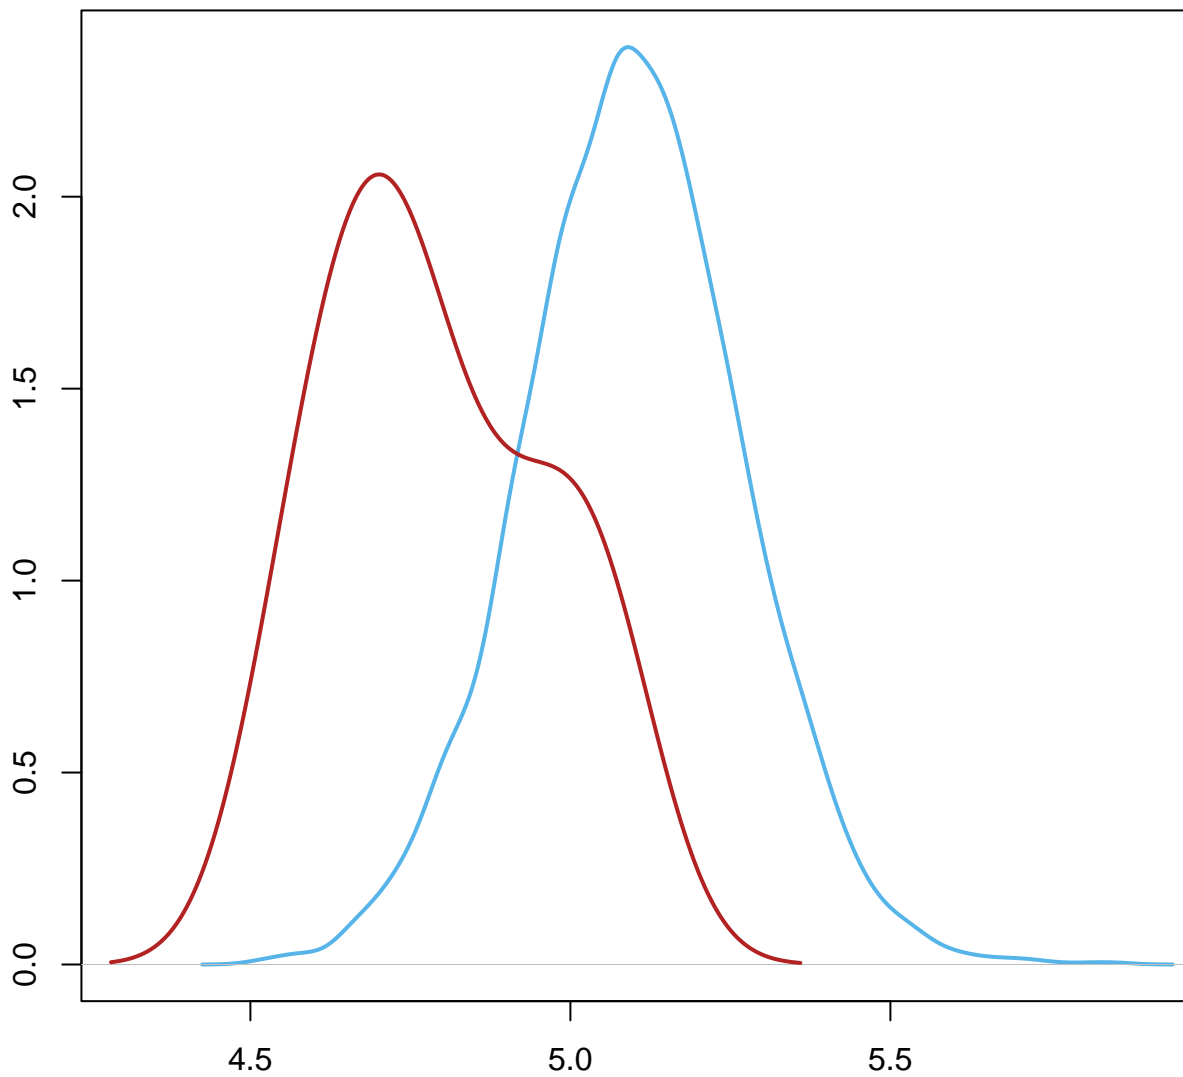

In\_Sr

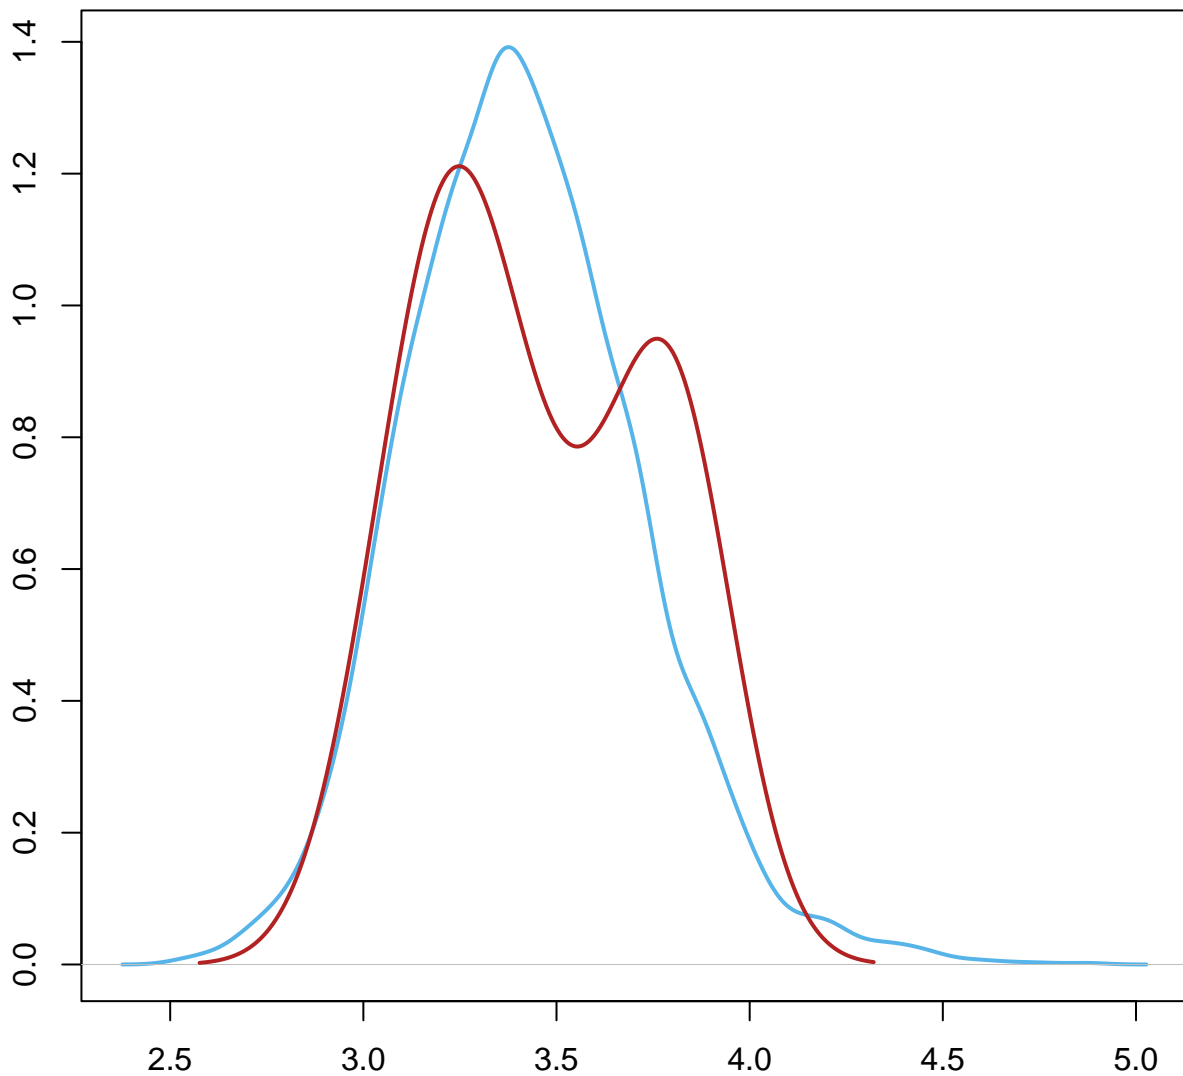

In\_Mo

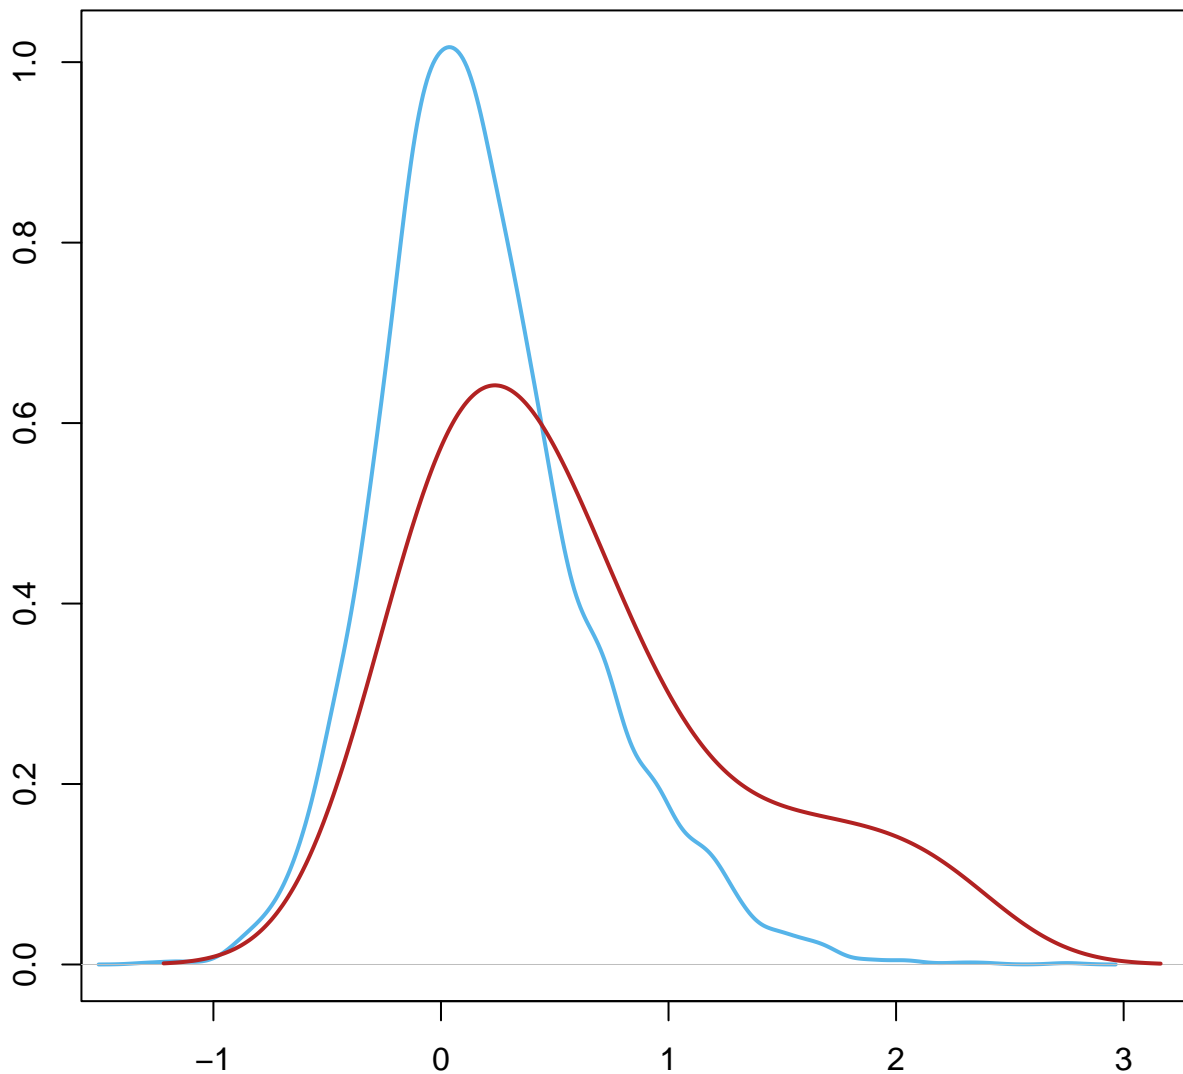

**In\_Ag**

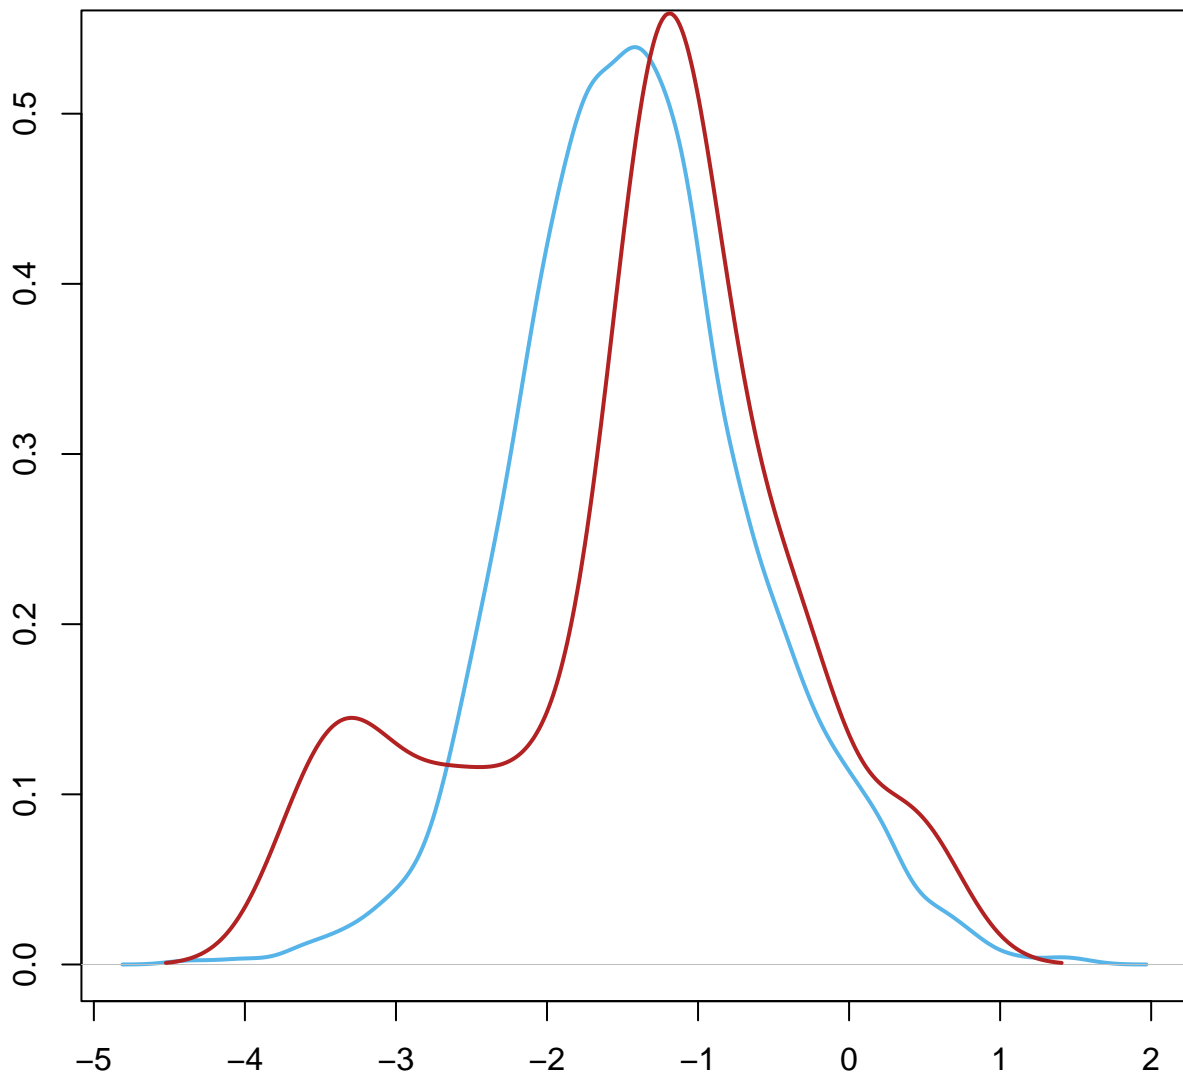



**ln\_Cs**

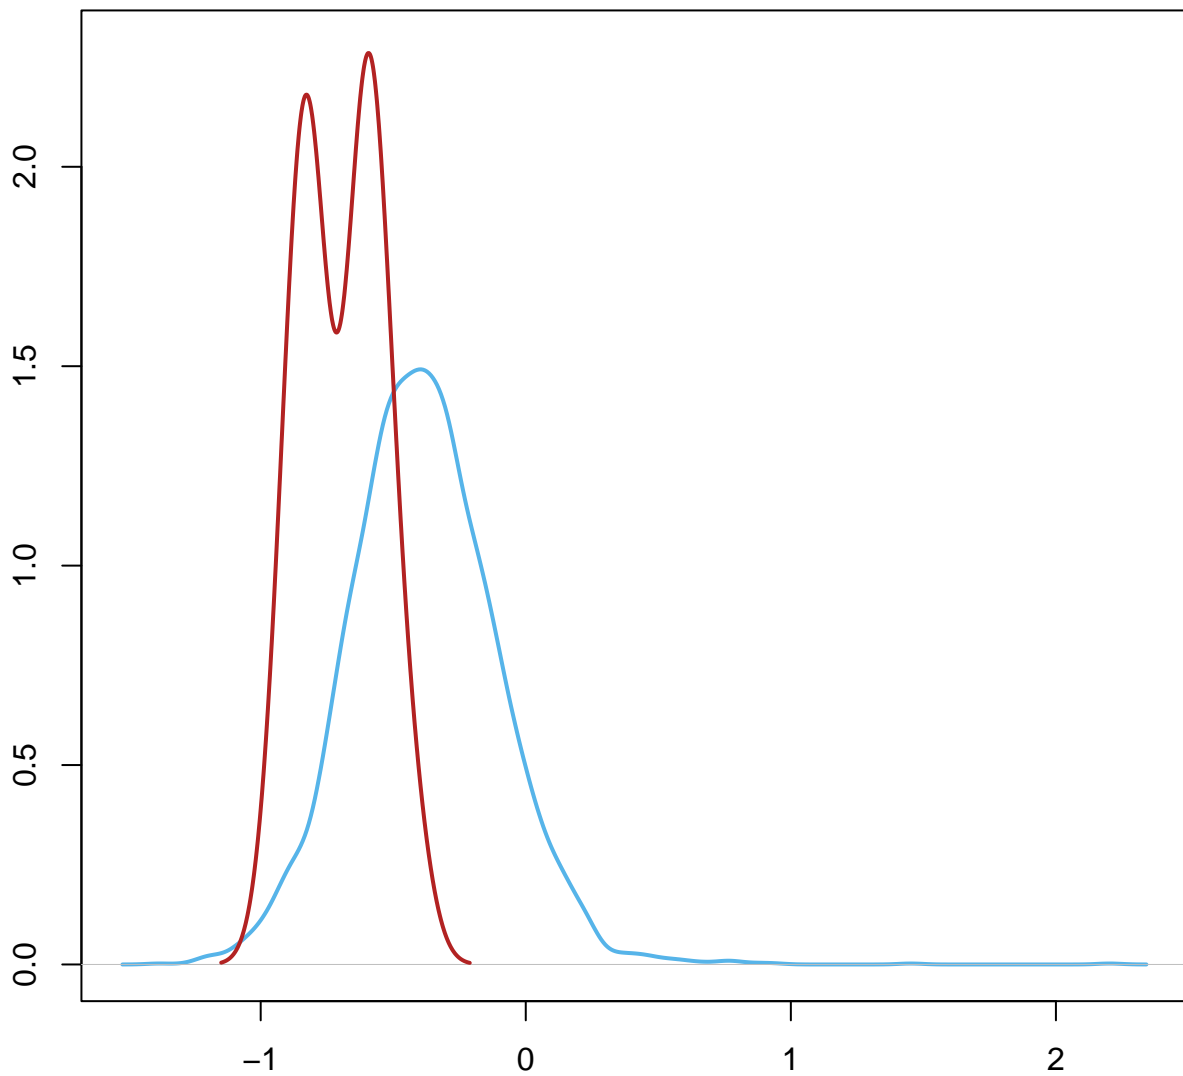

Supplement: Supporting_Figure_1.zip [file Supporting_Figure_1.zip]

In\_Na

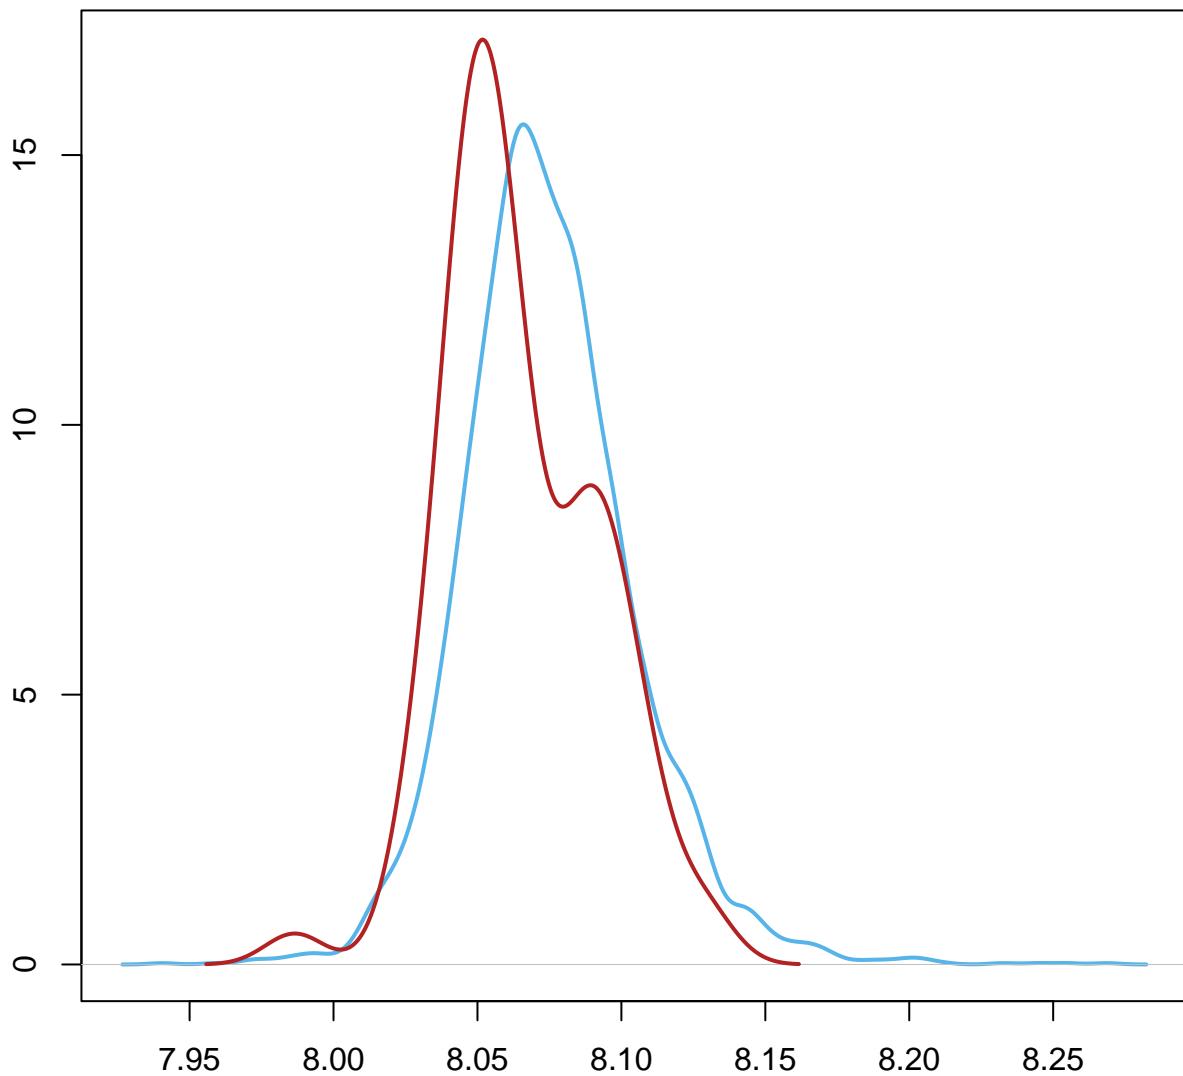

ln\_Mg

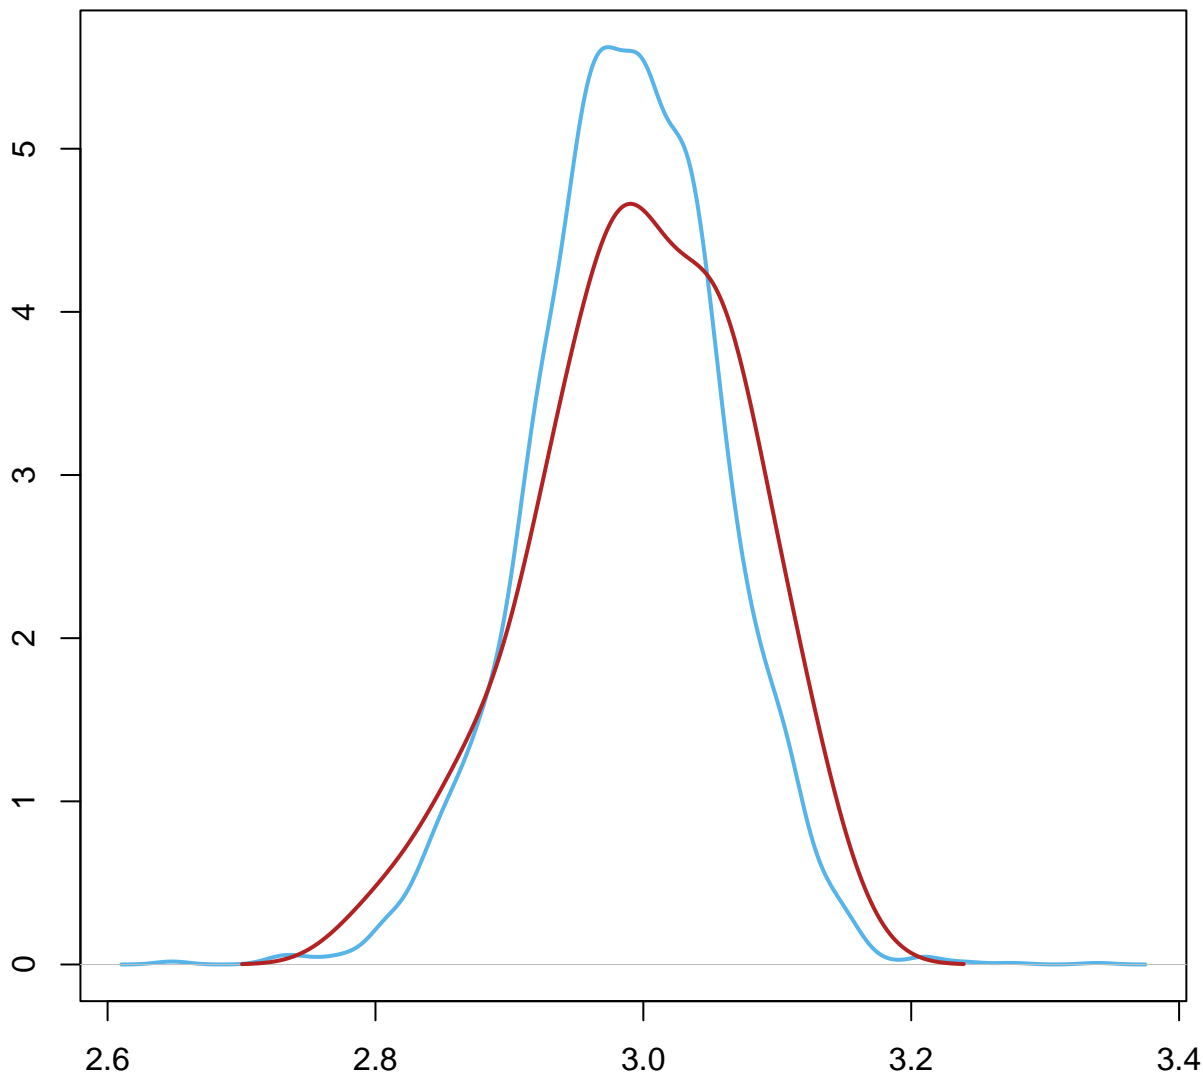

ln\_P

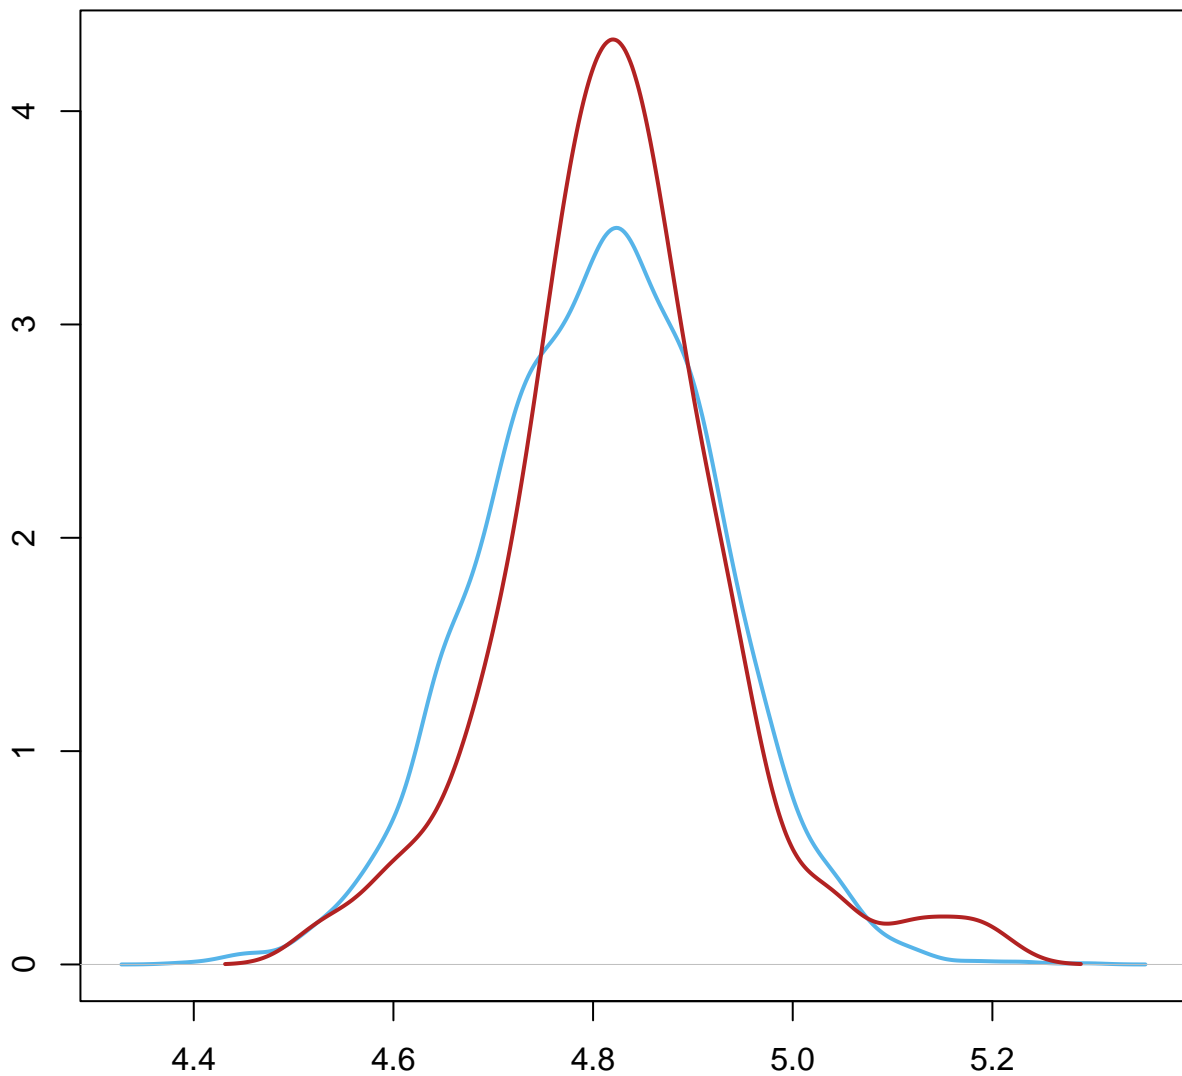

$\ln_S$

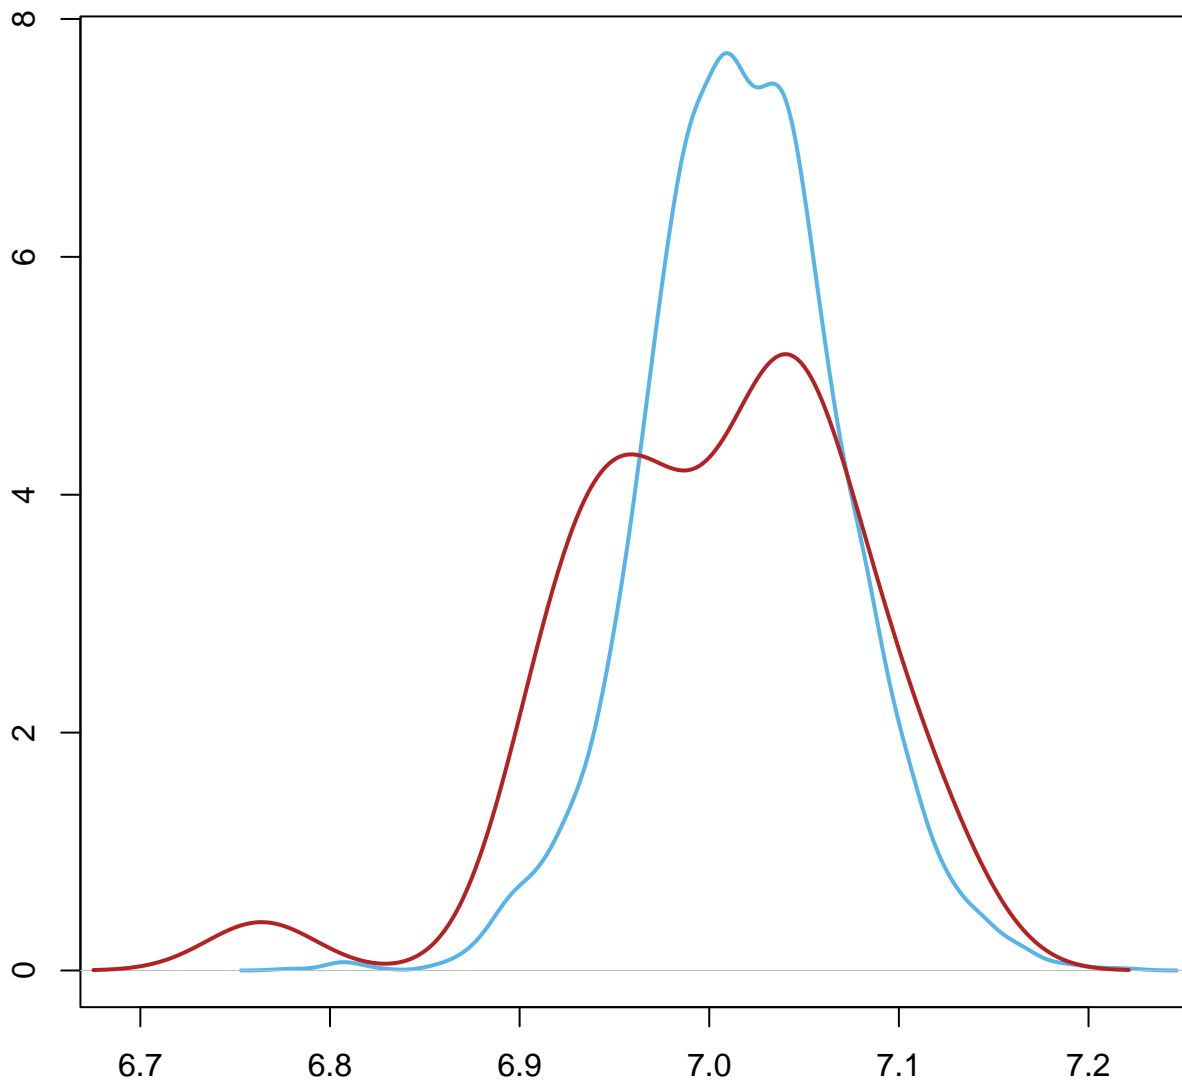

ln\_K

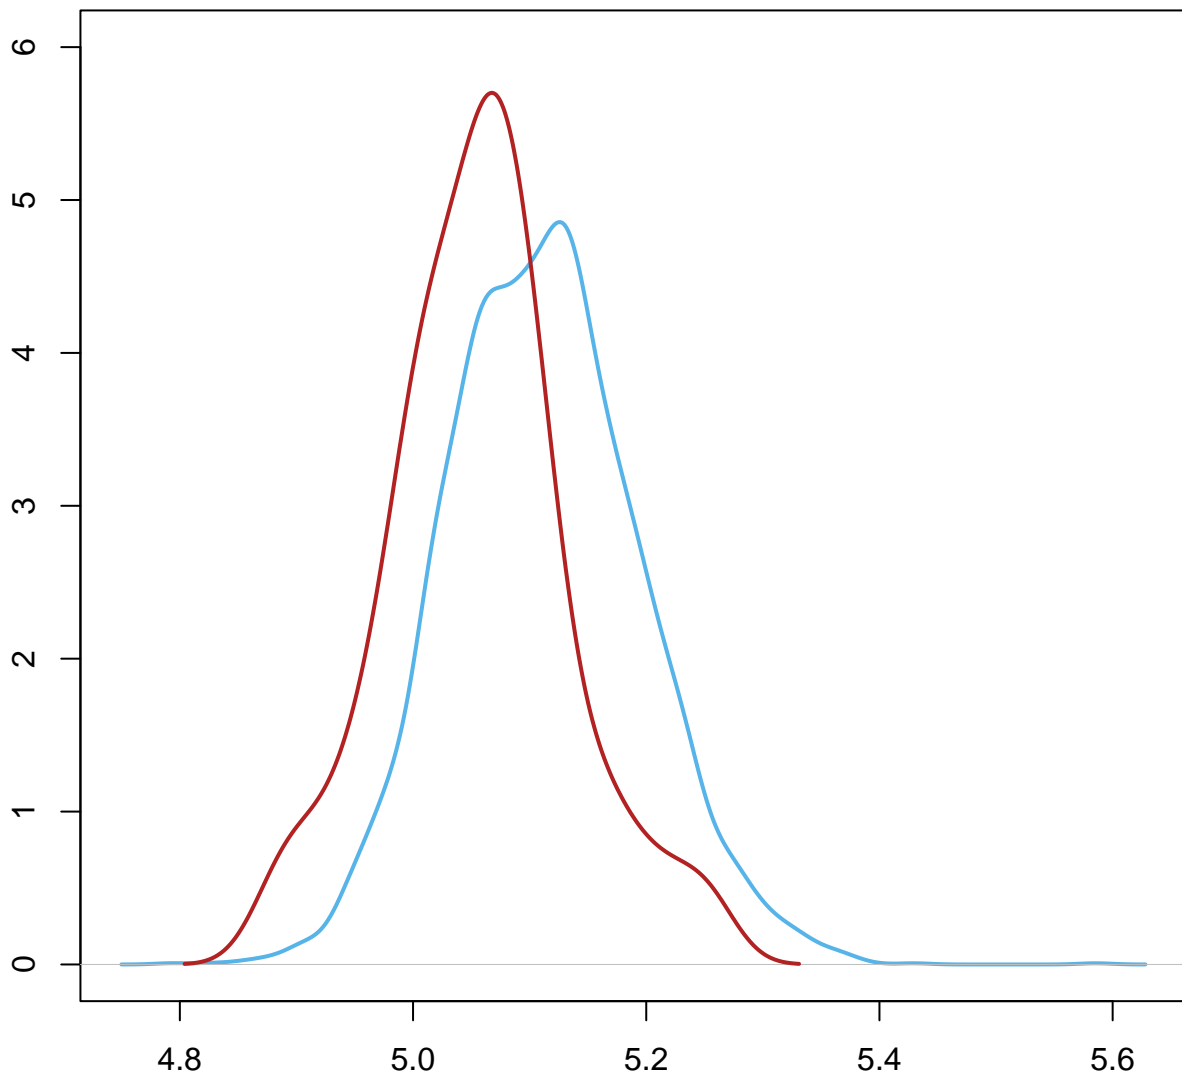

In\_Ca

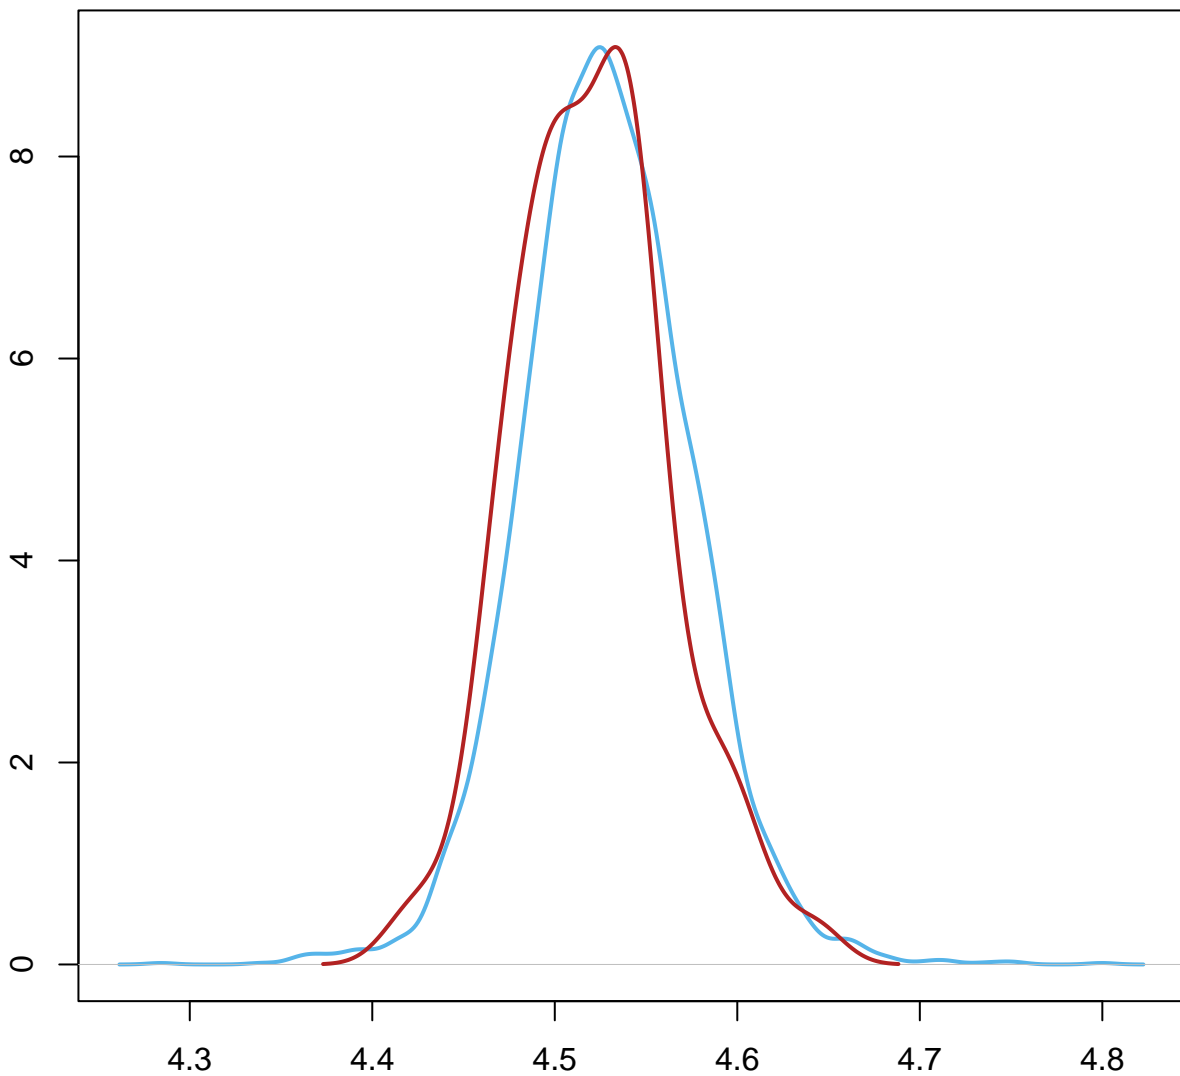

**In\_Fe**

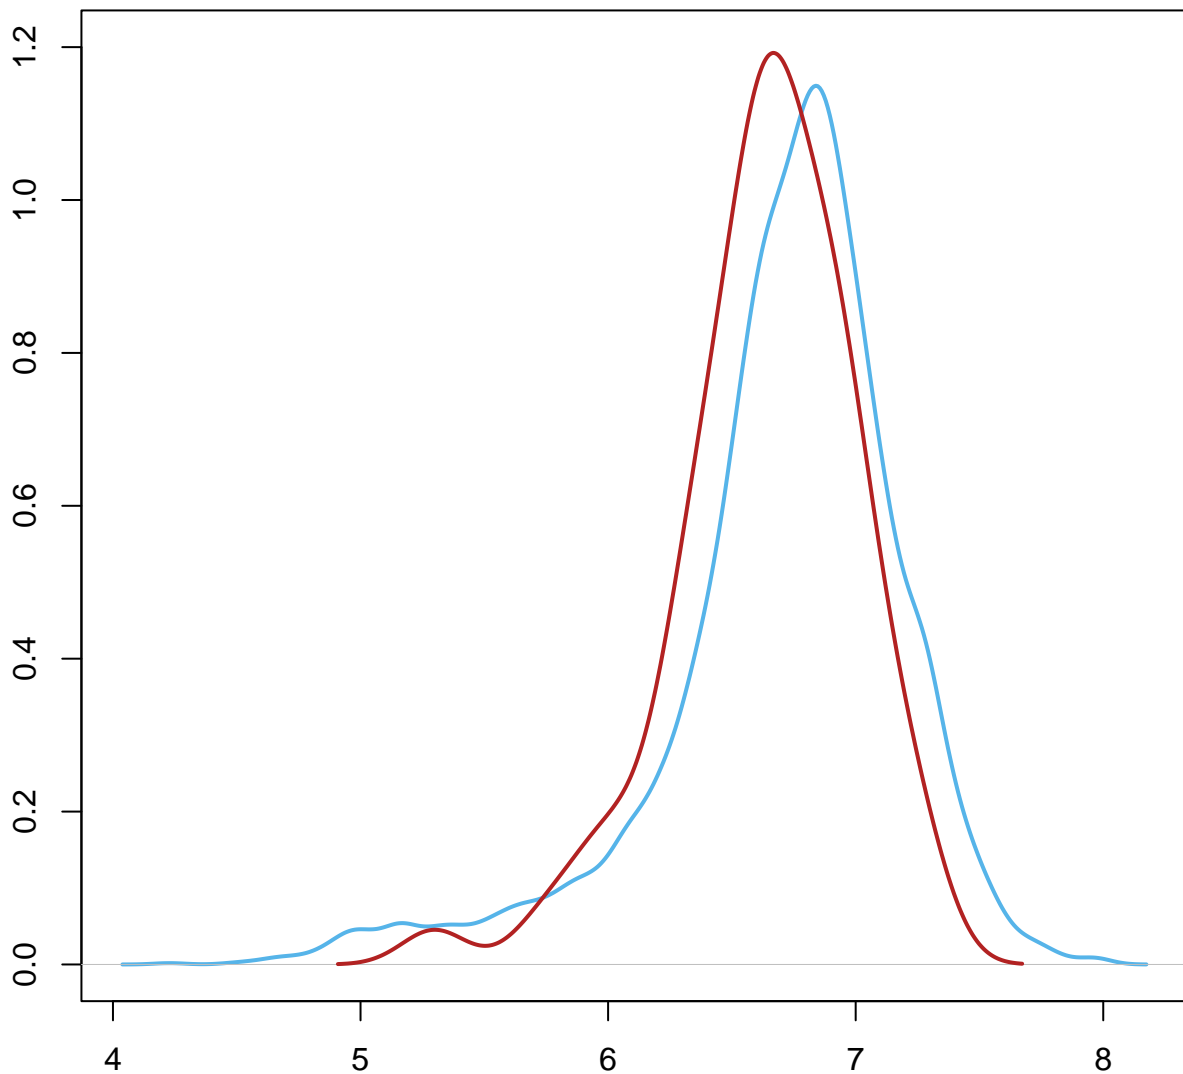

ln\_Co

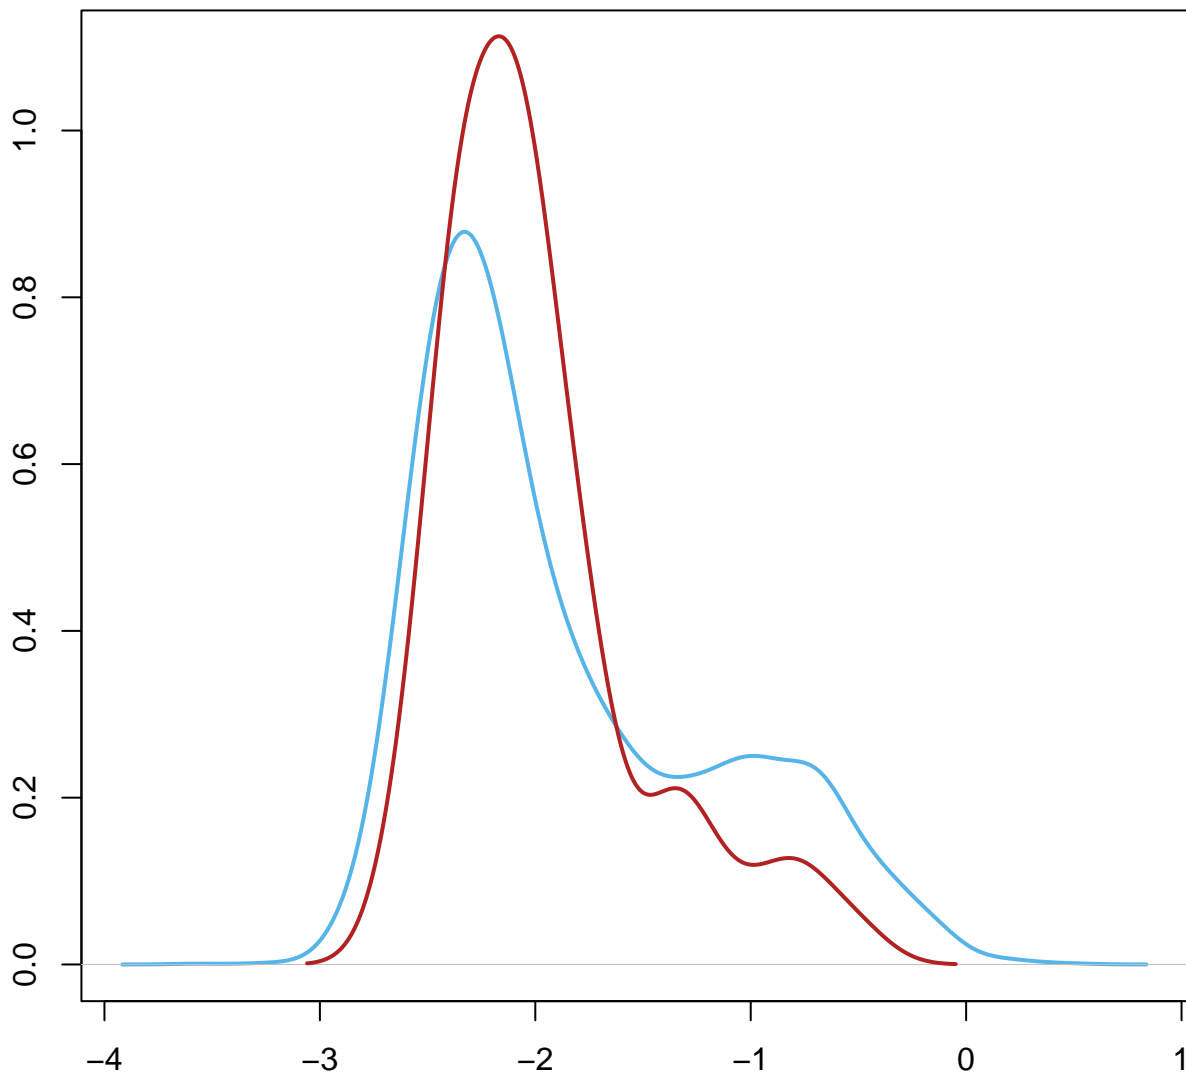



In\_Cu

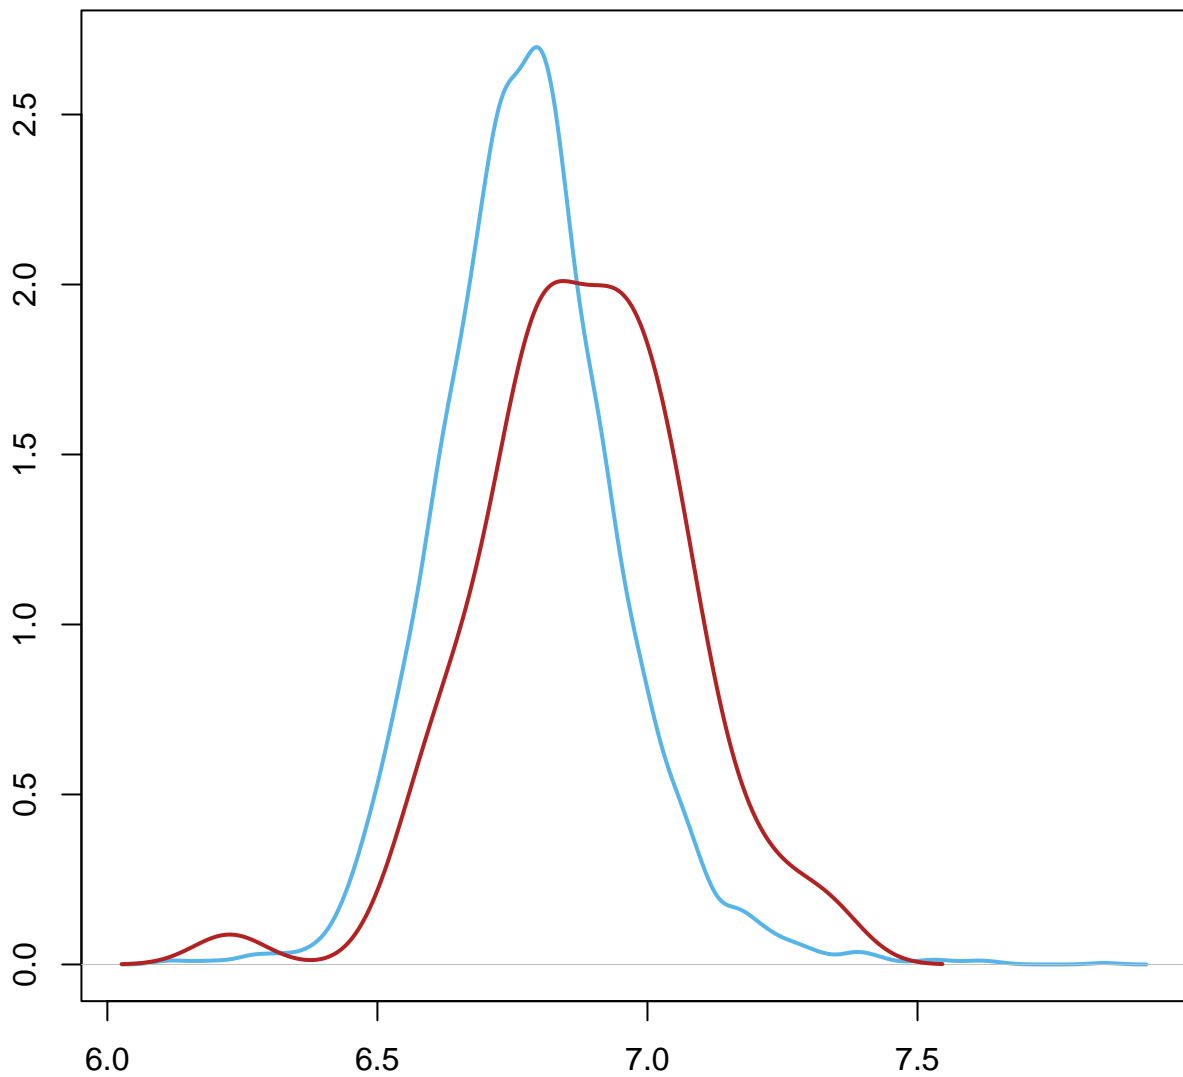

ln\_Zn

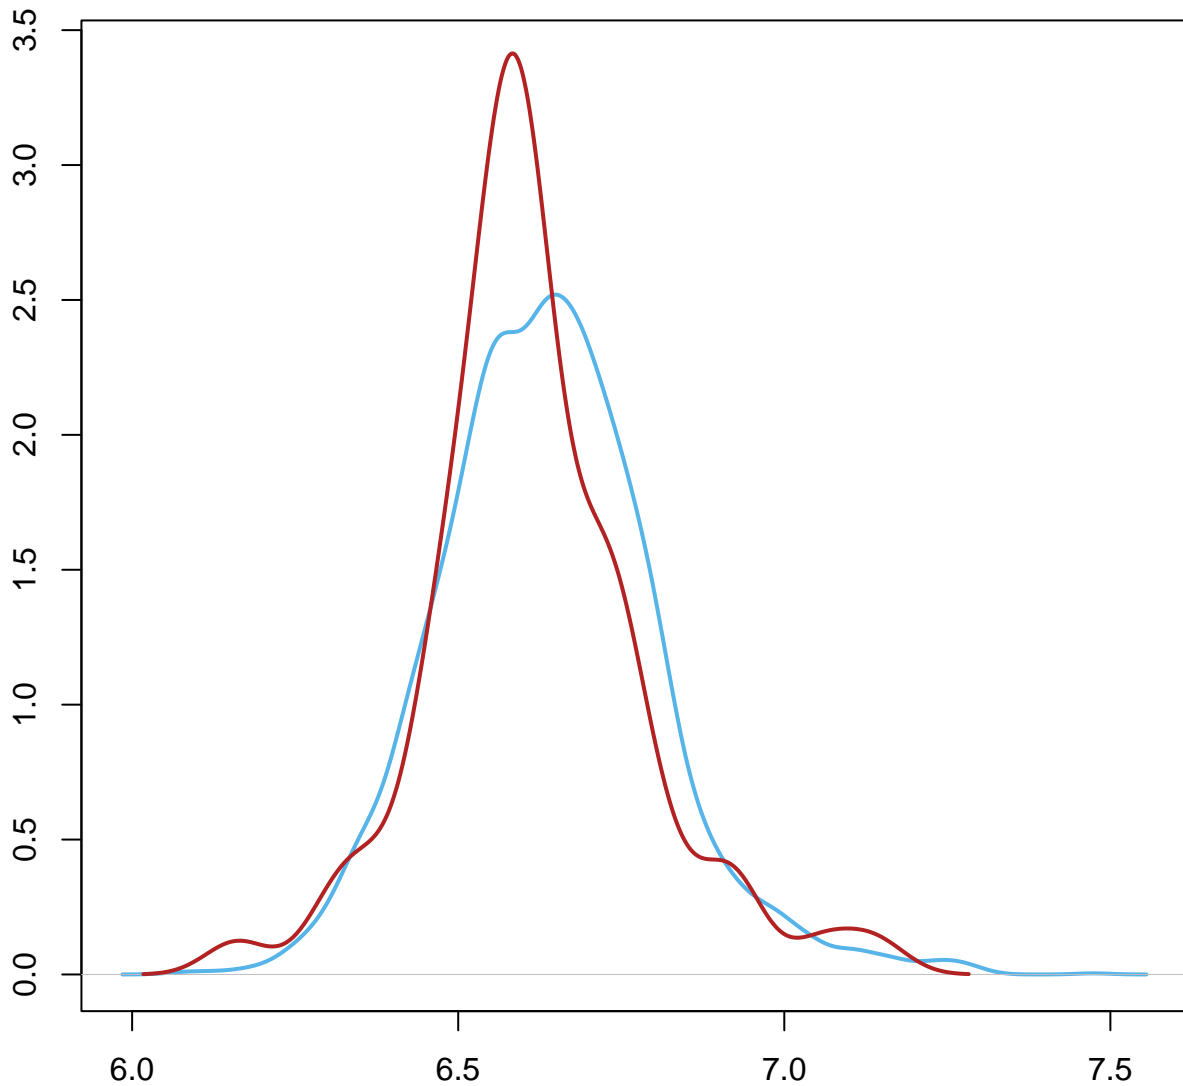

**ln\_As**

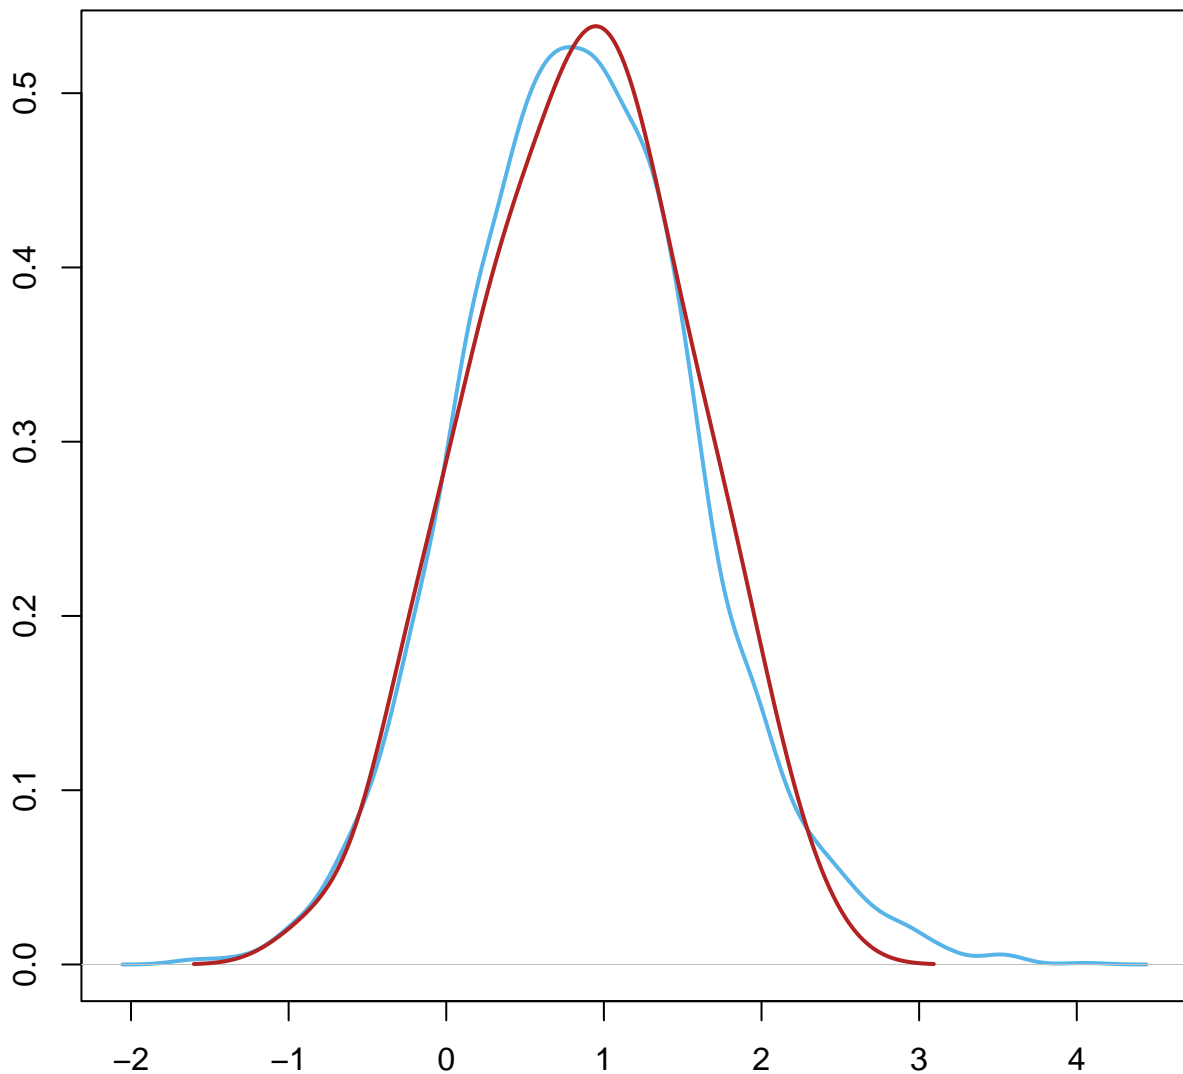

In\_Se

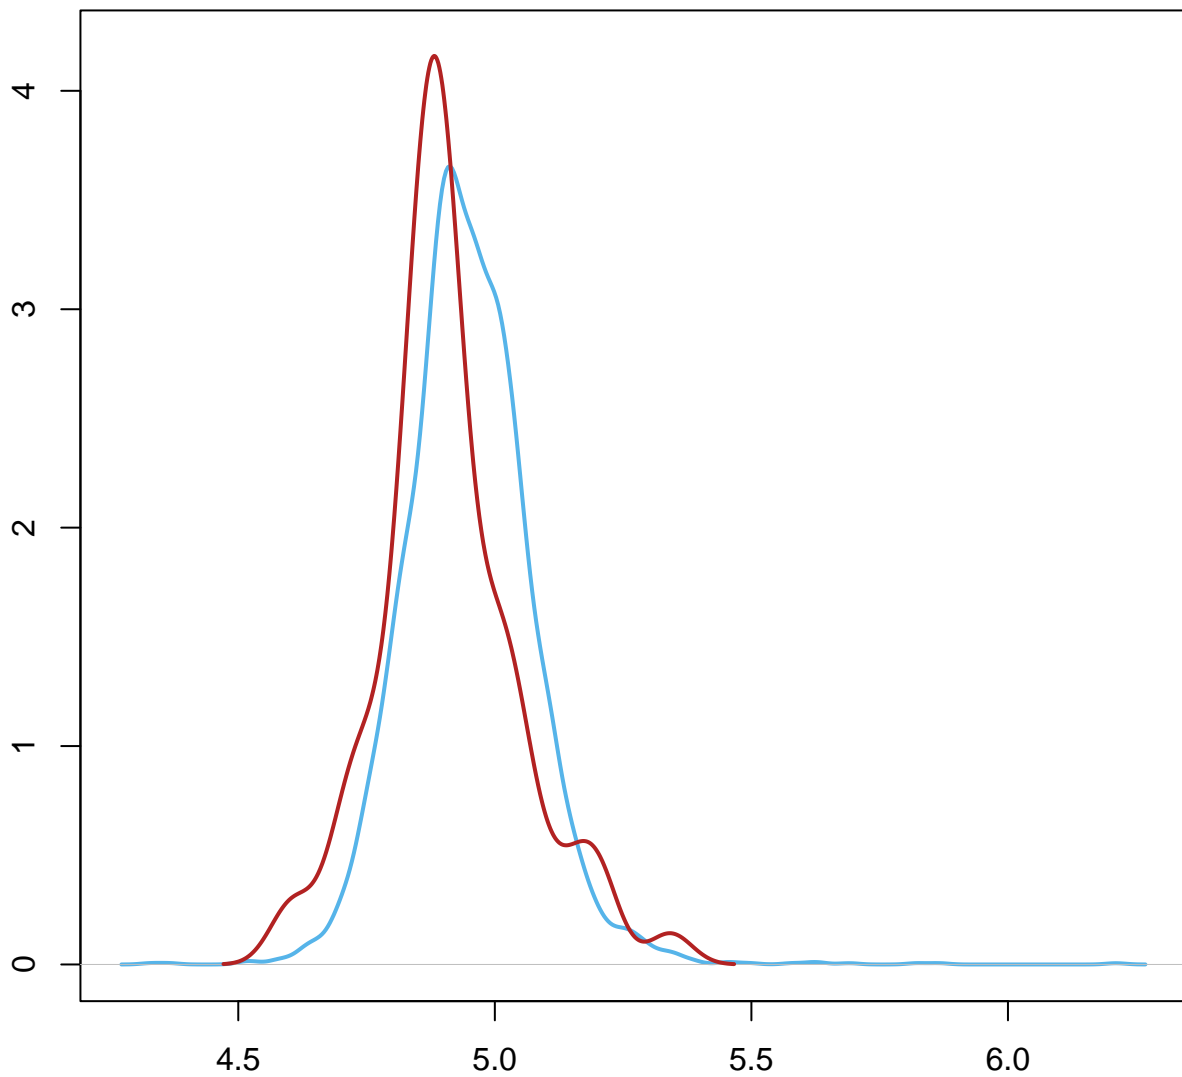

**ln\_Rb**

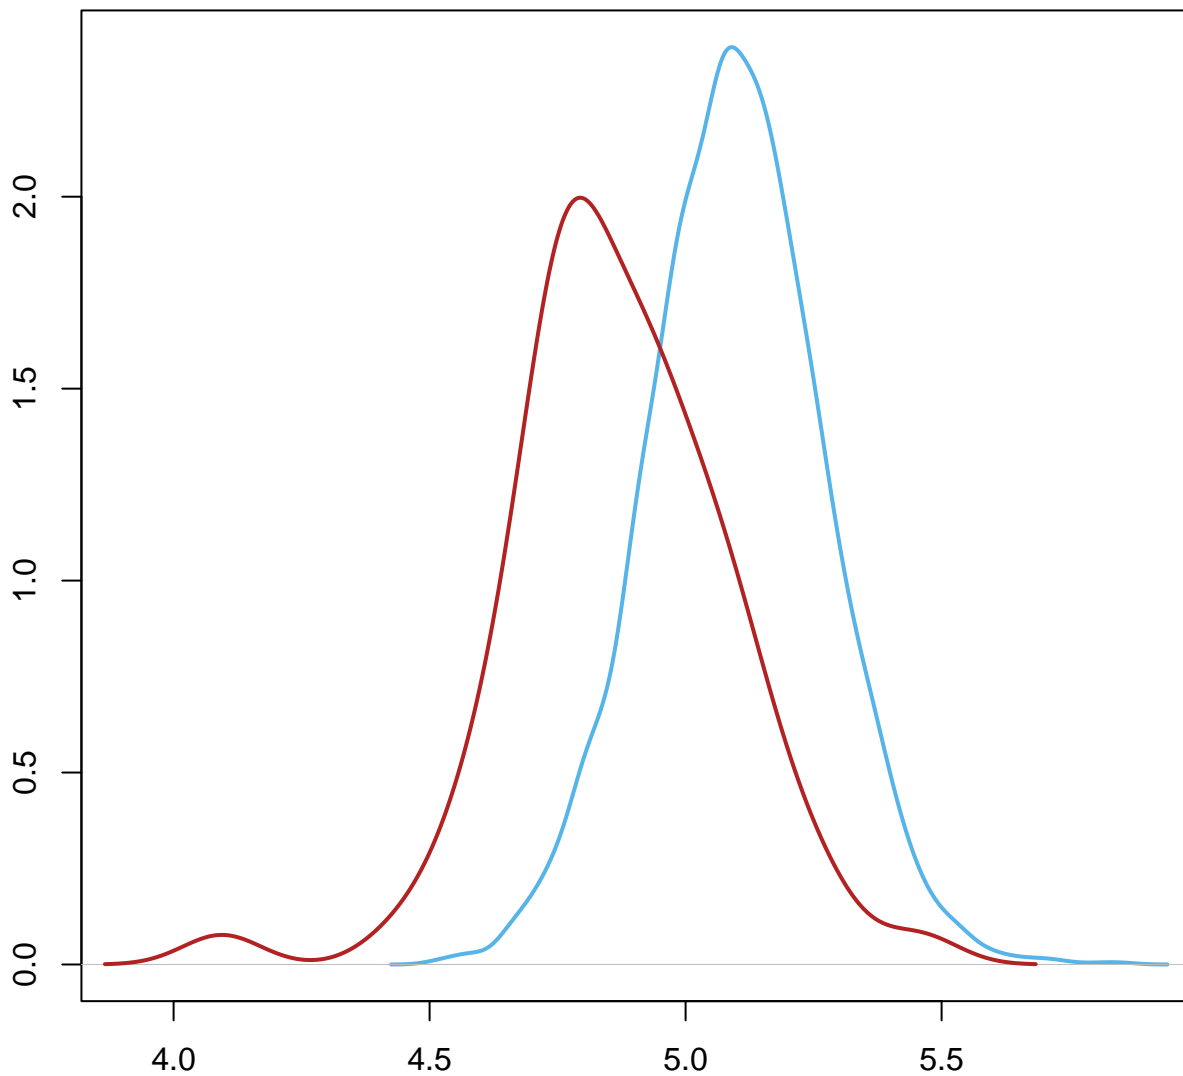

In\_Sr

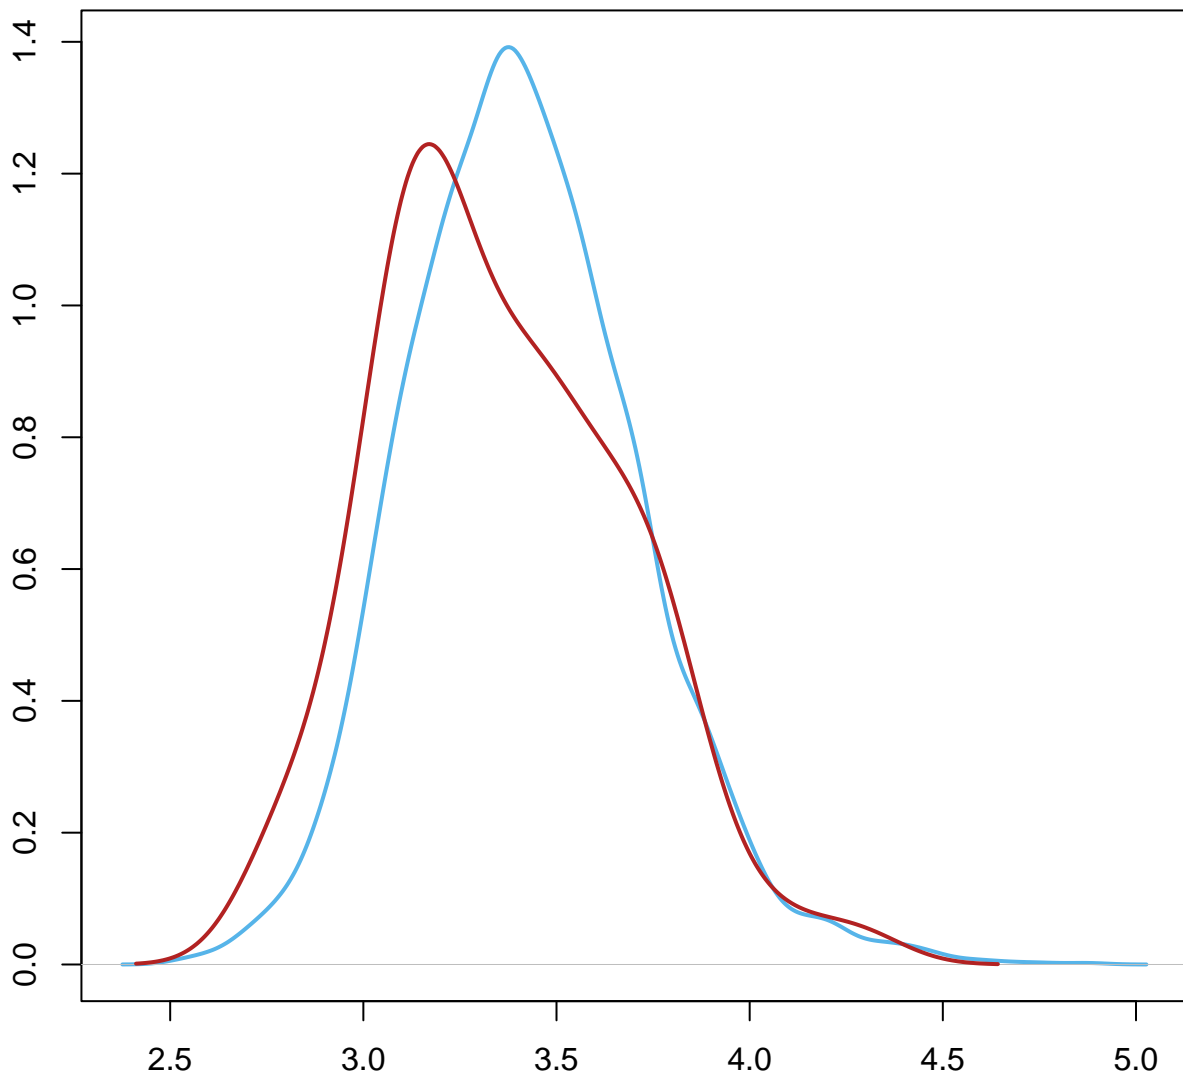

In\_Mo

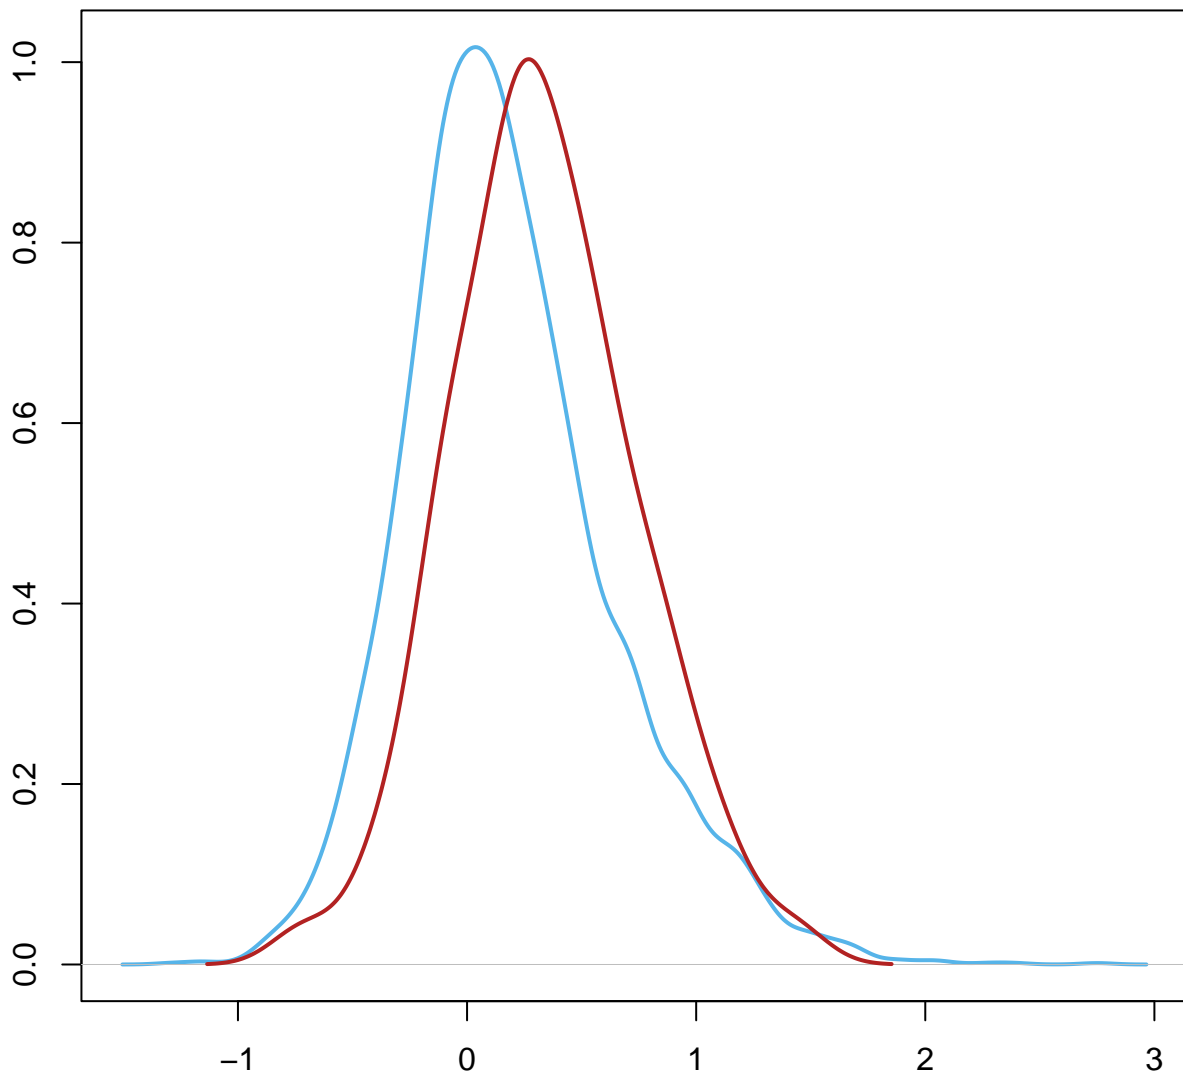

In\_Ag

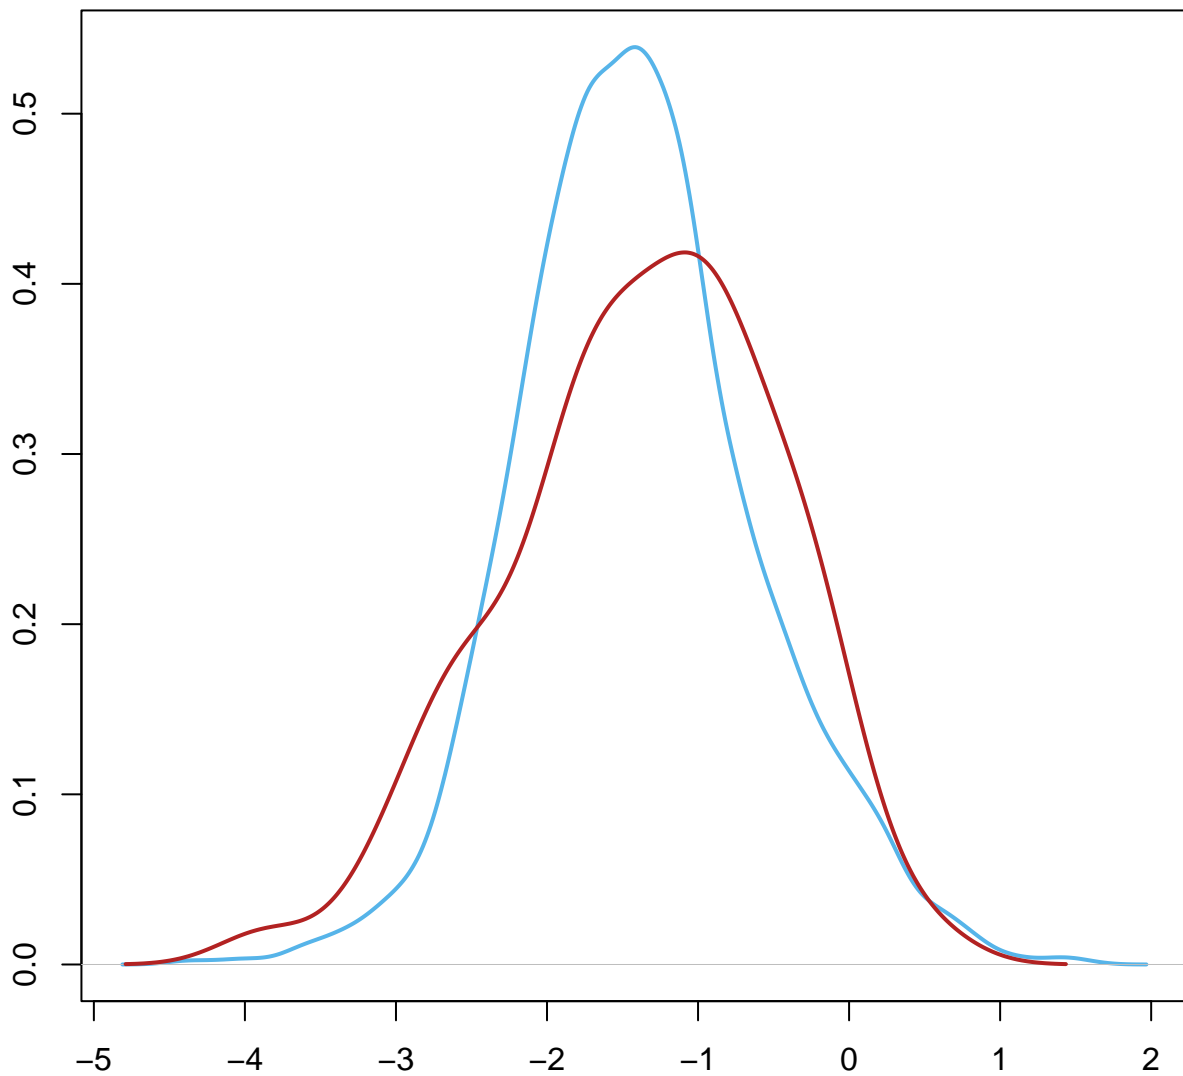



**ln\_Cs**

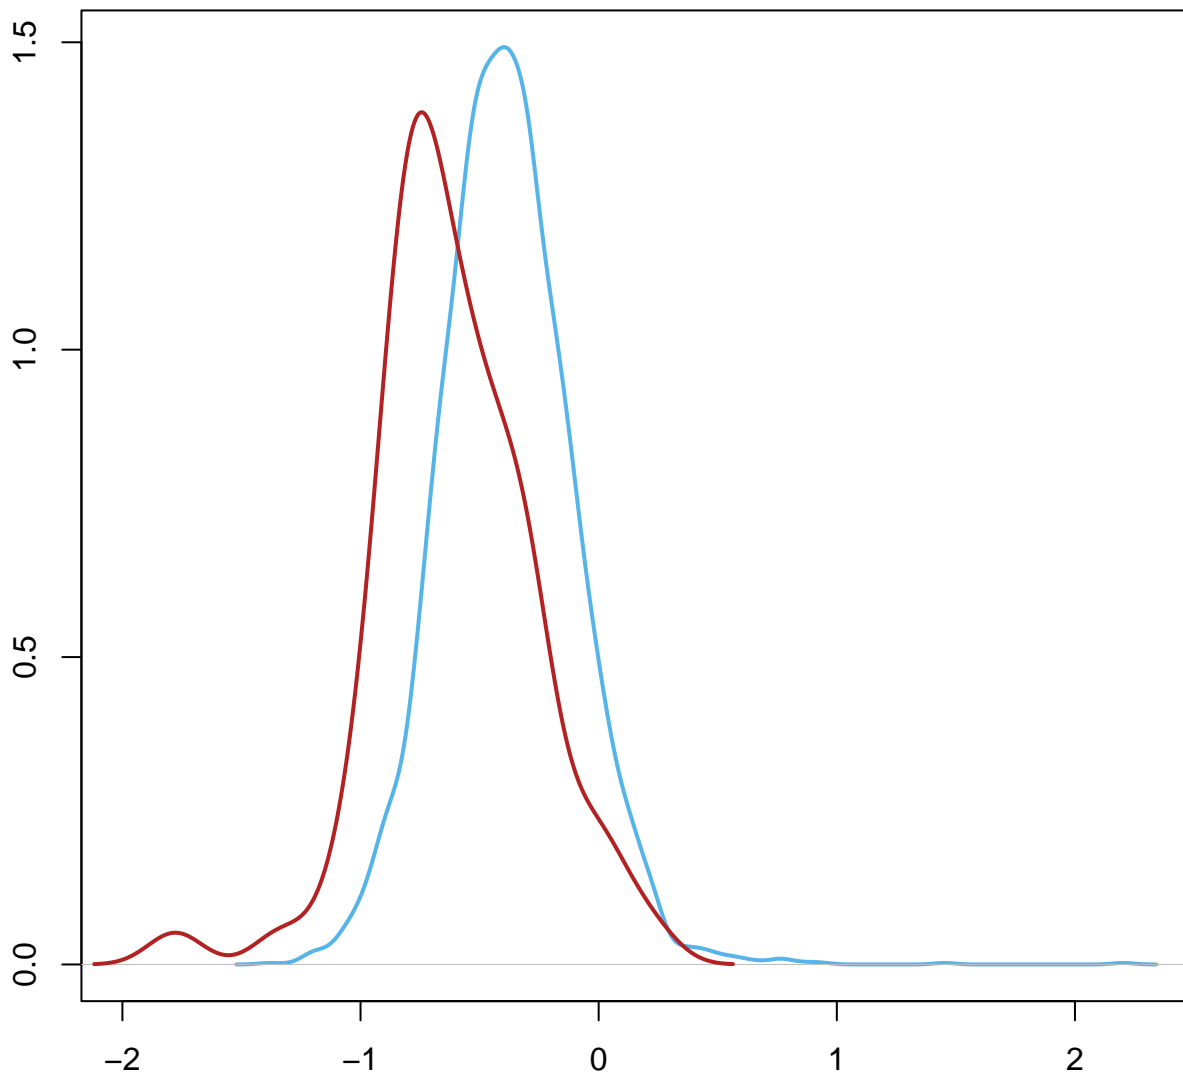

Supplement: Supporting_Figure_1.zip [file Supporting_Figure_1.zip]

In\_Na

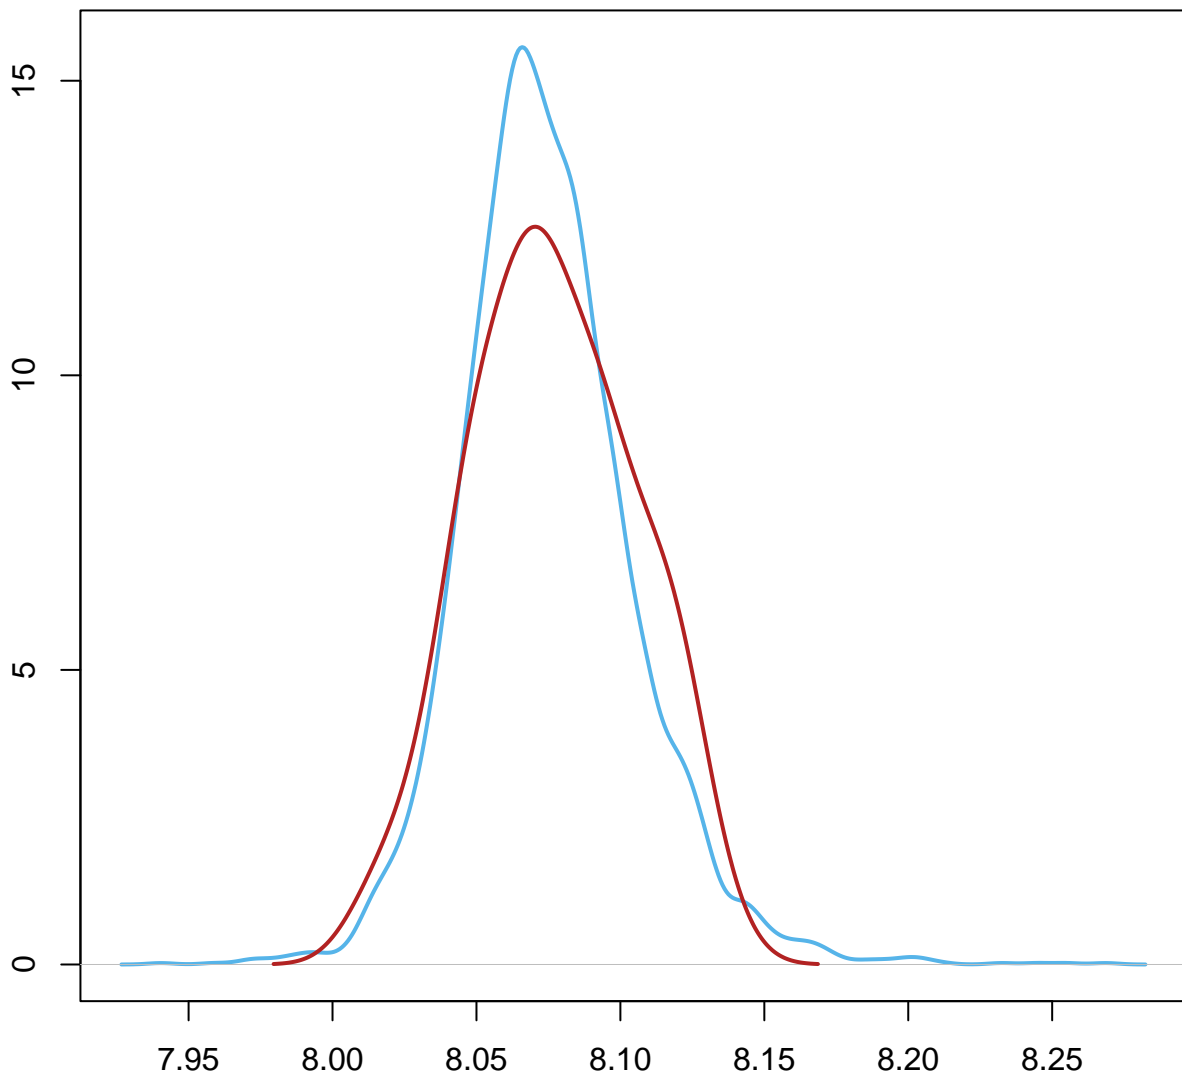

ln\_Mg

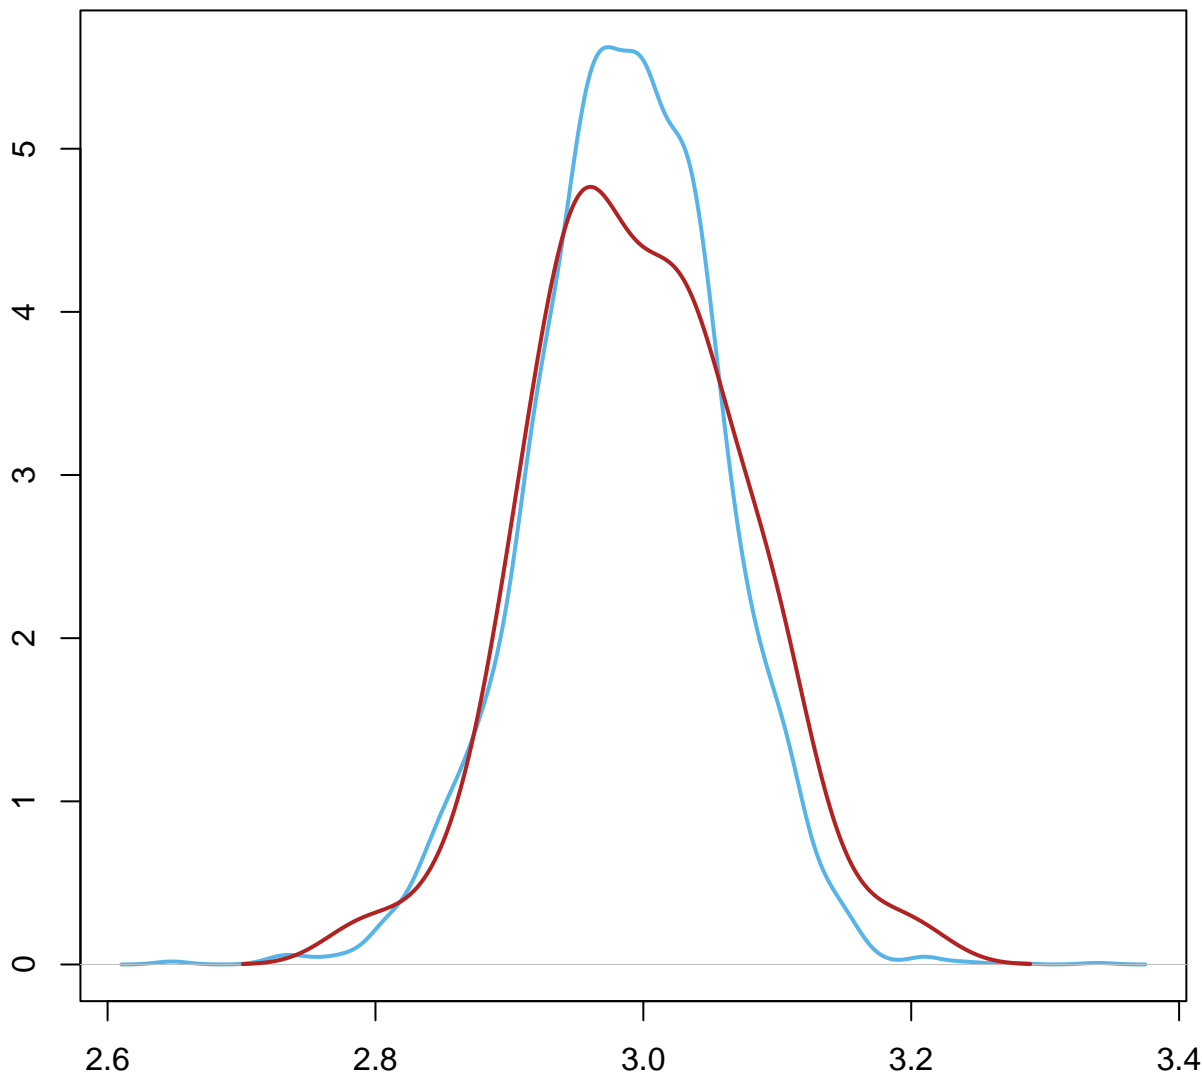

ln\_P

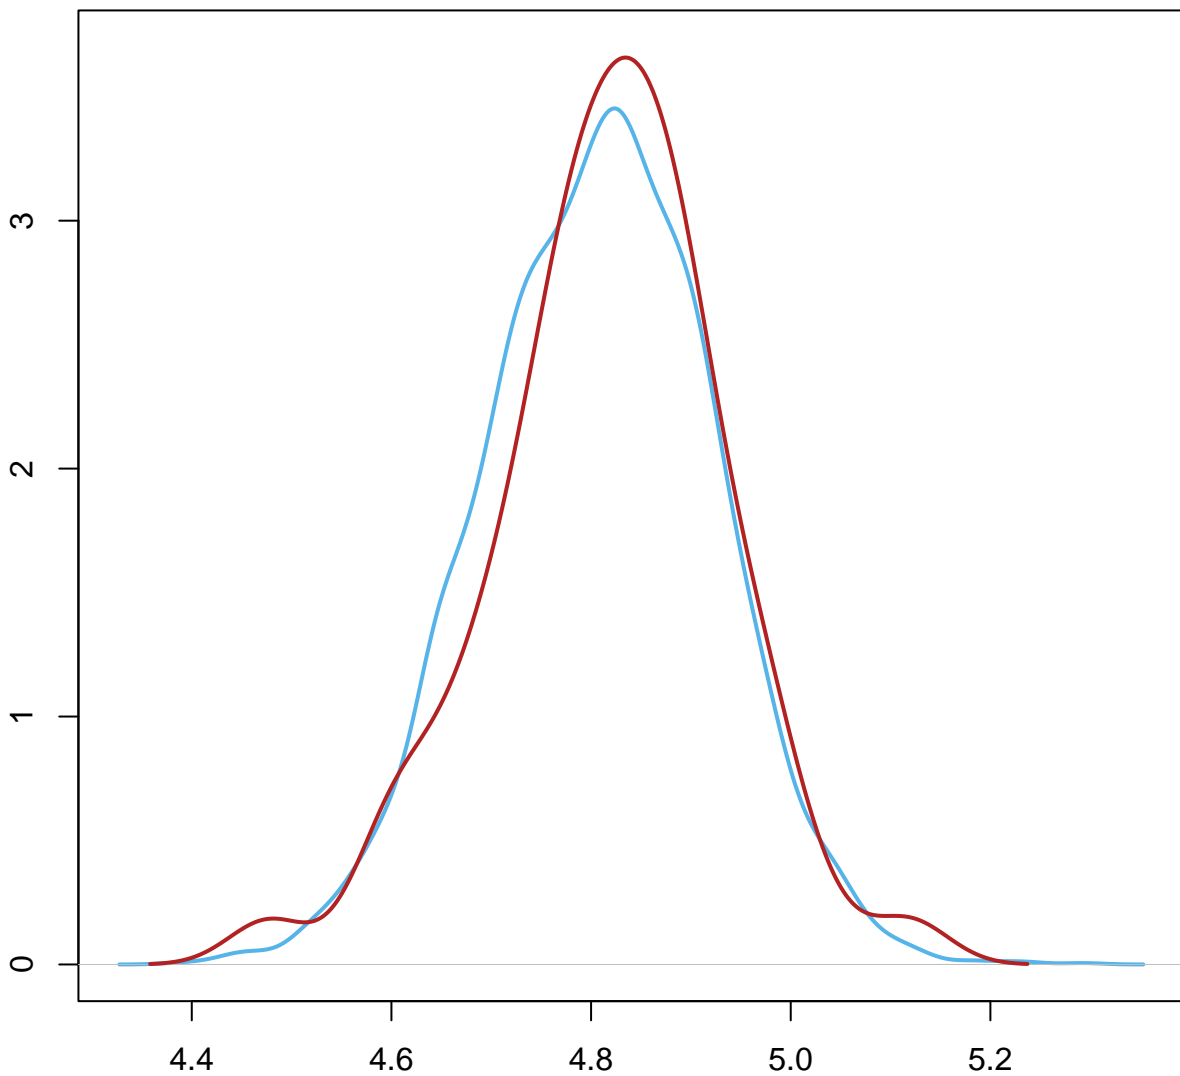

$\ln_S$

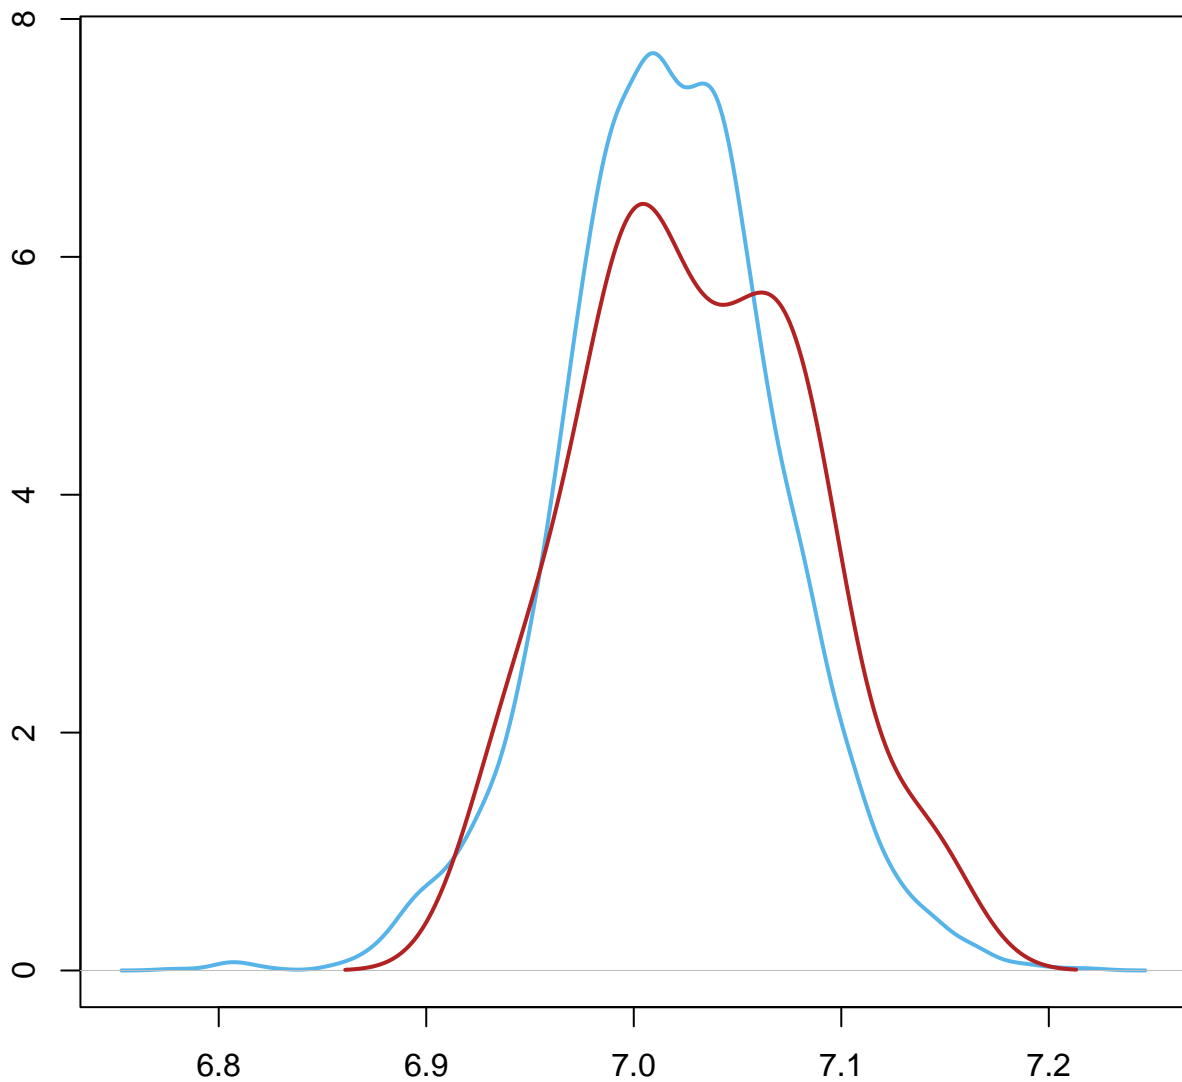

ln\_K

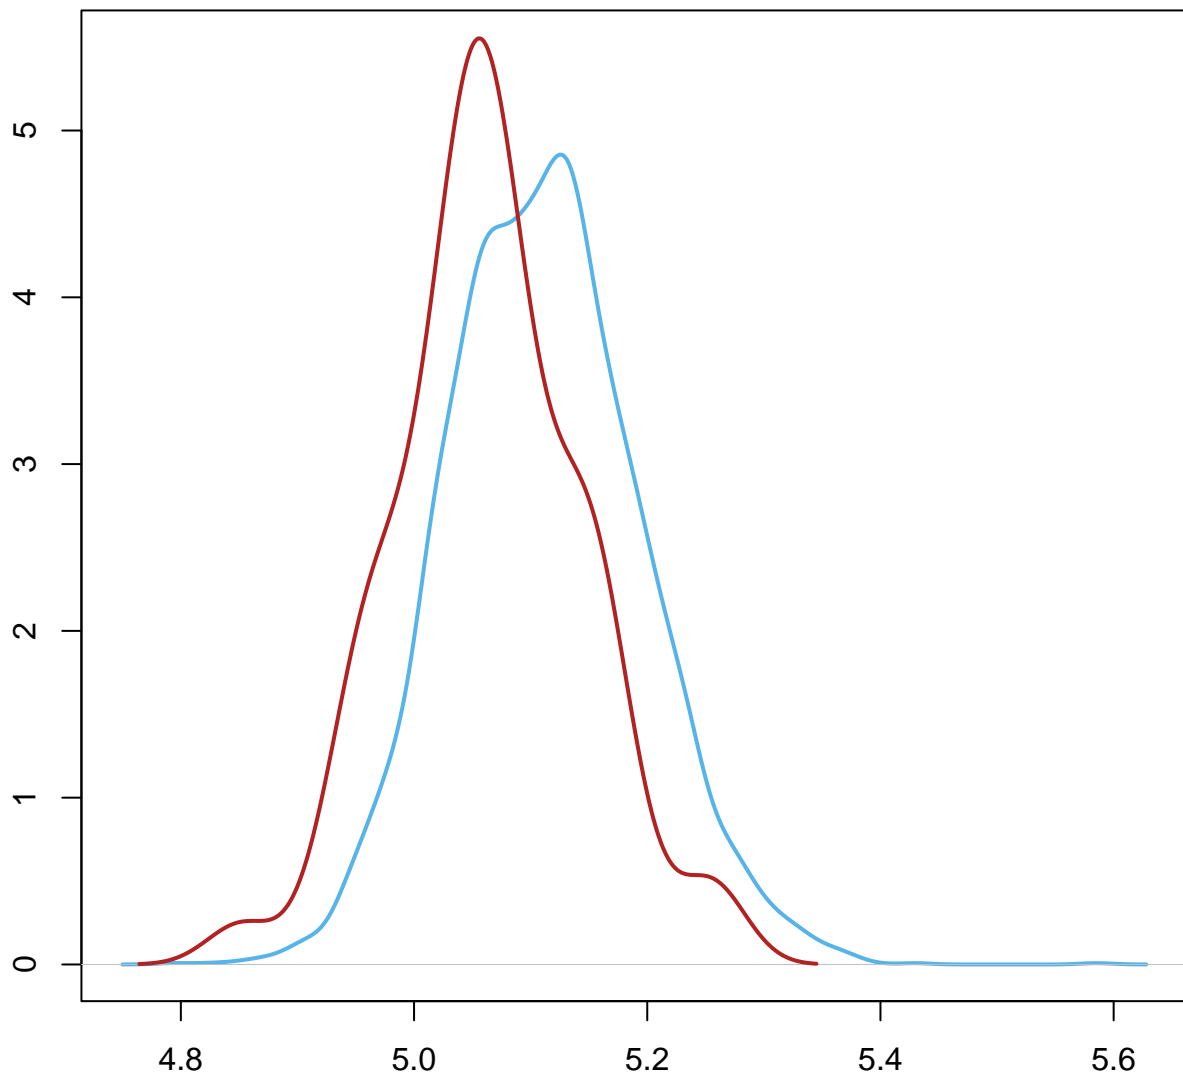

In\_Ca

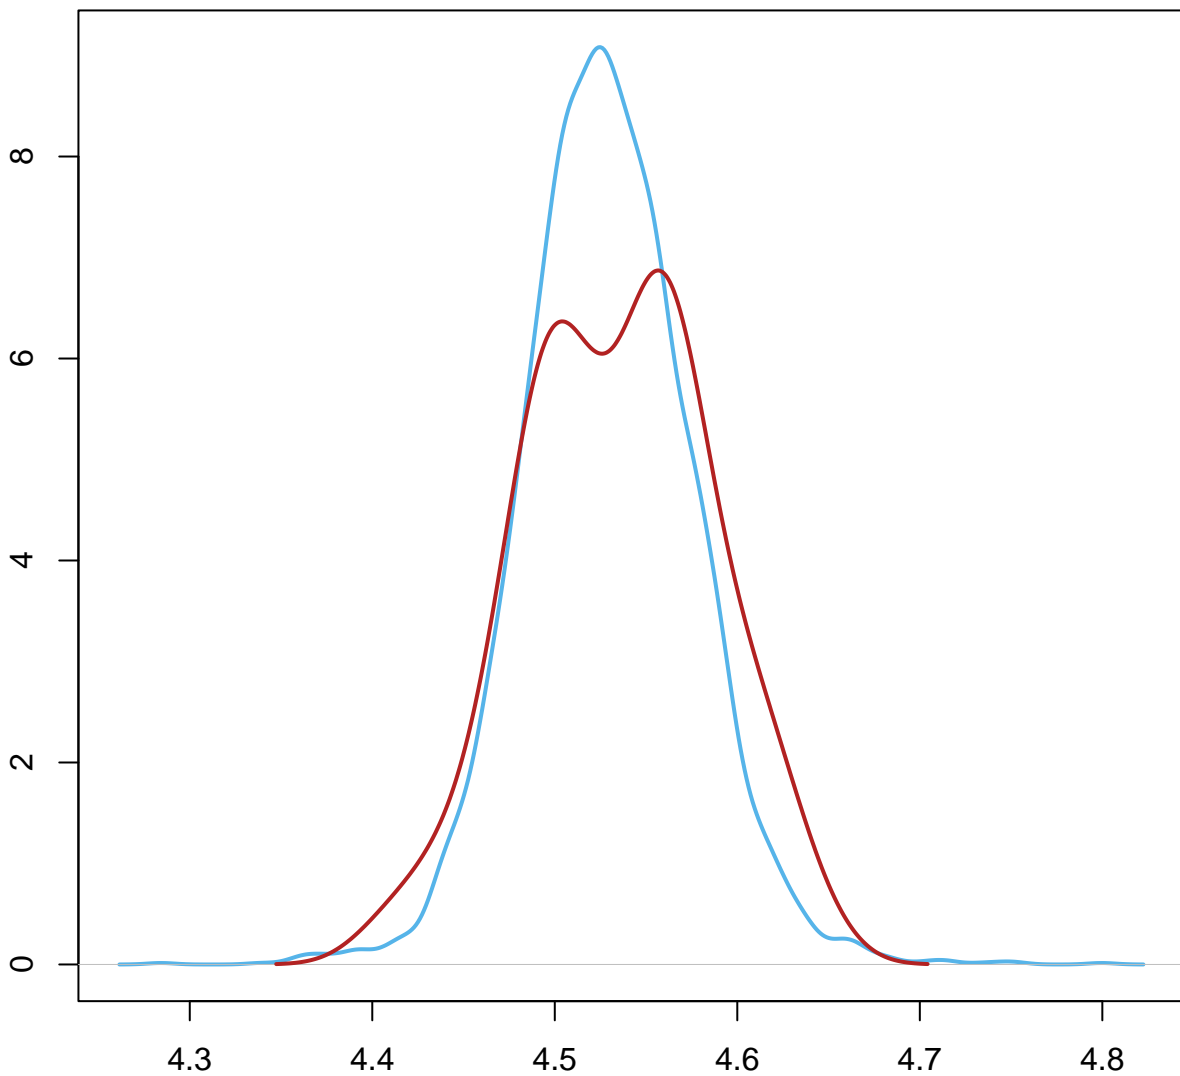

In\_Fe

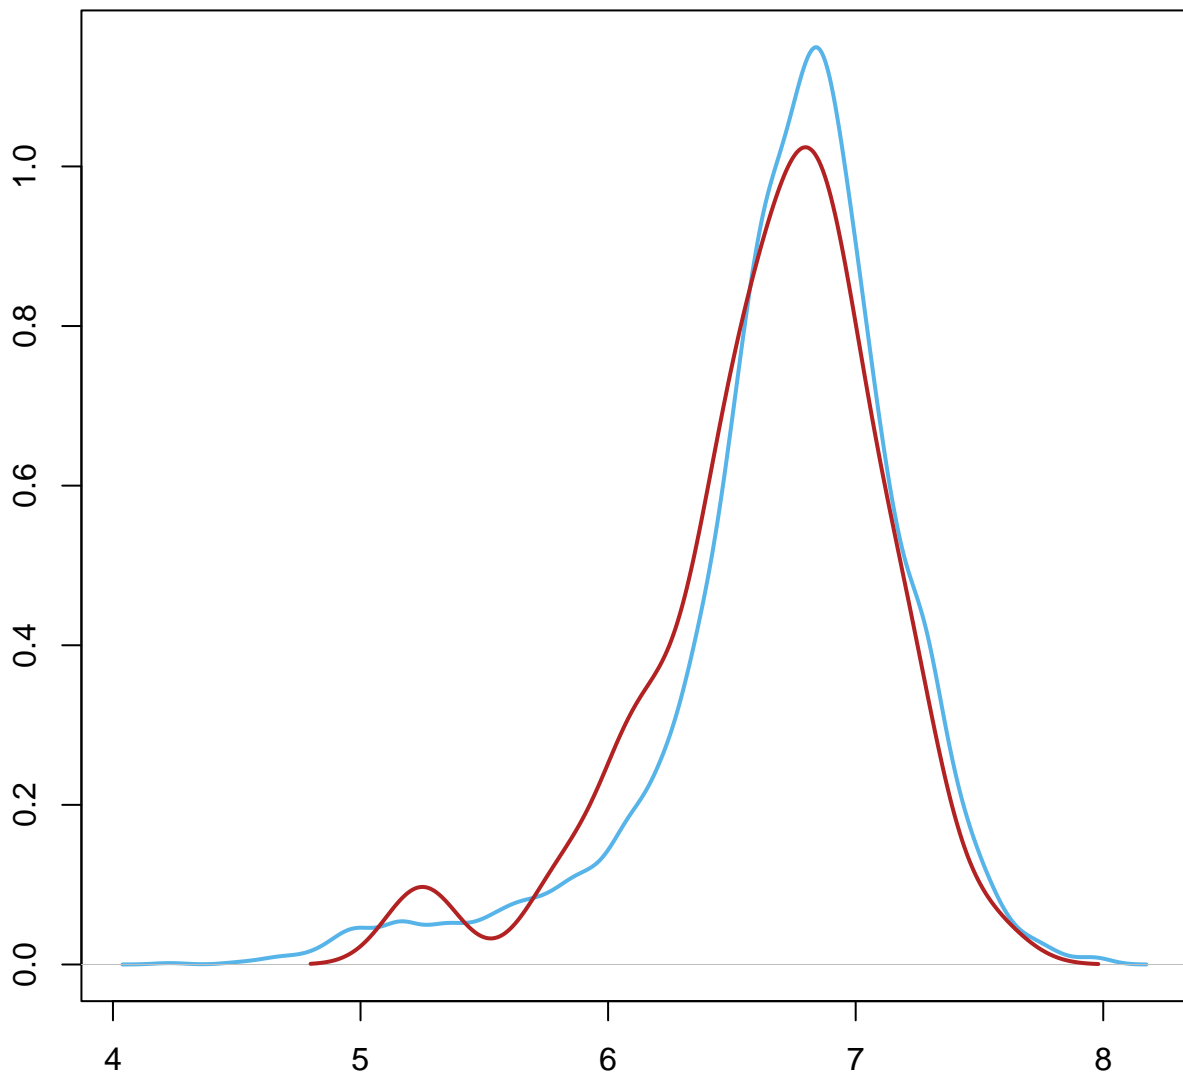

ln\_Co

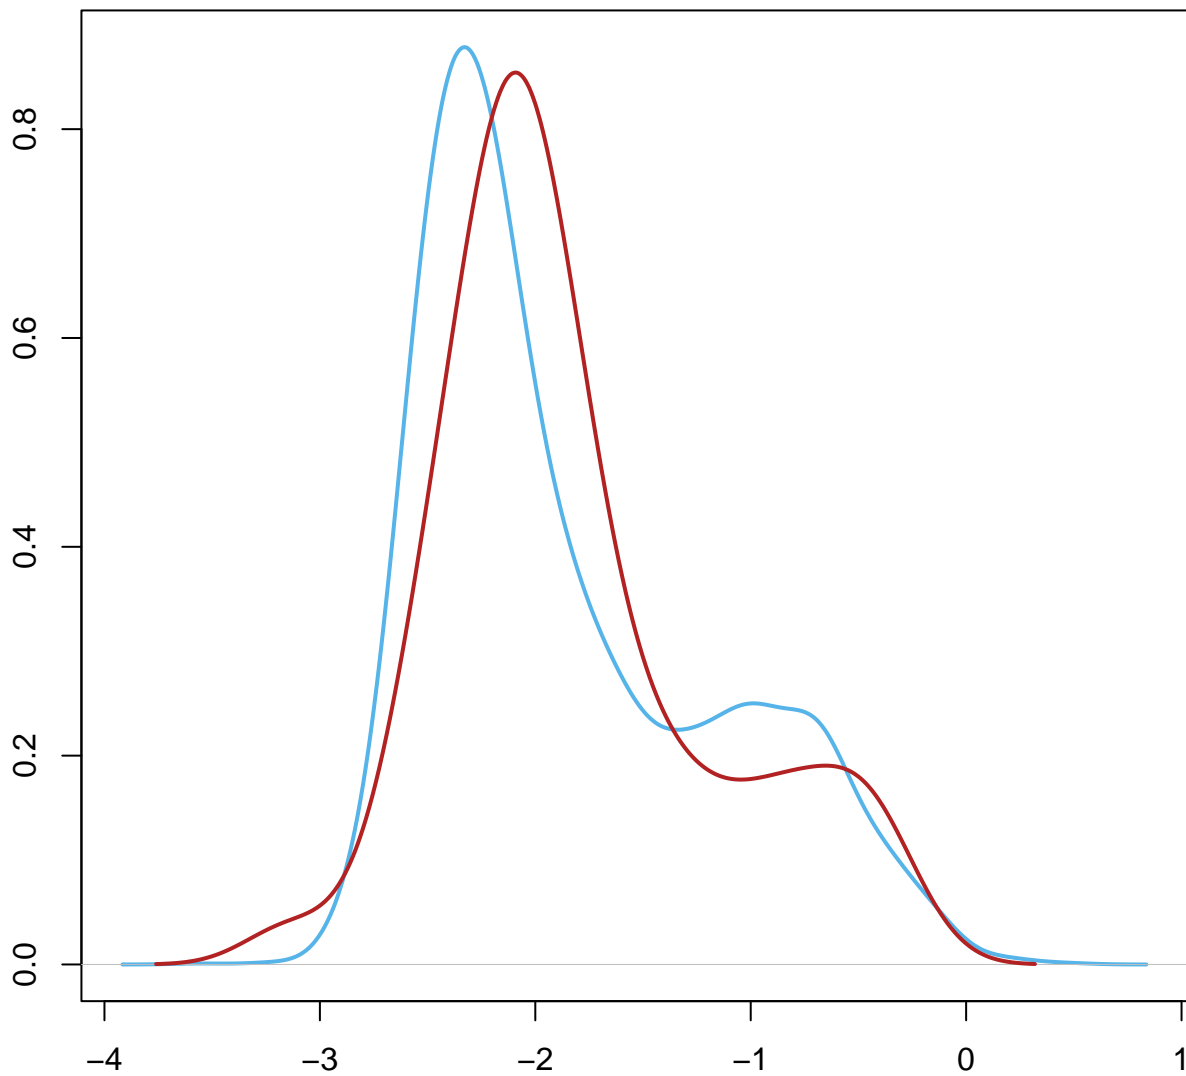



In\_Cu

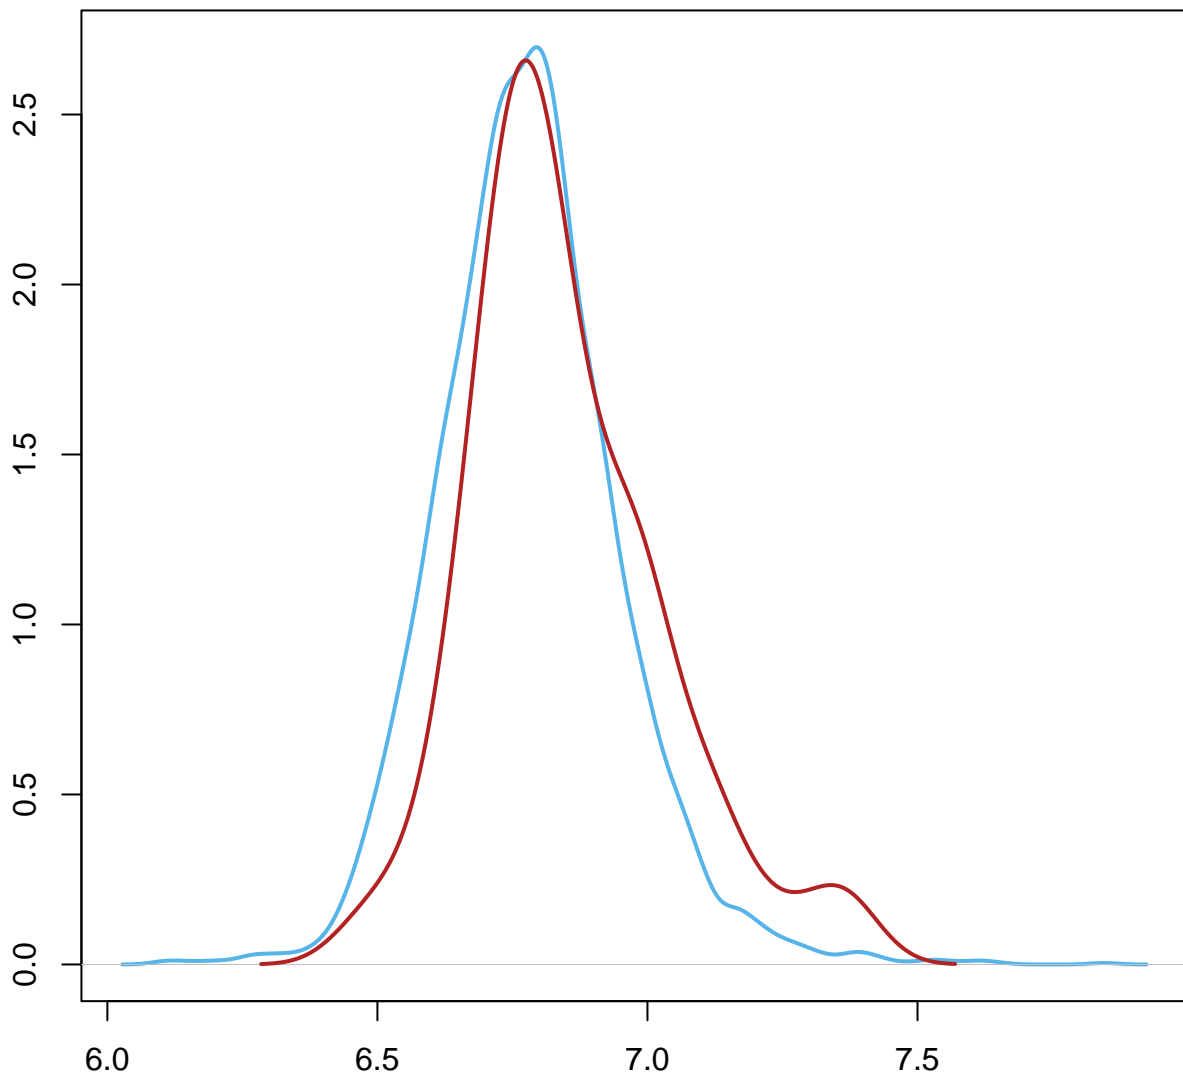

ln\_Zn

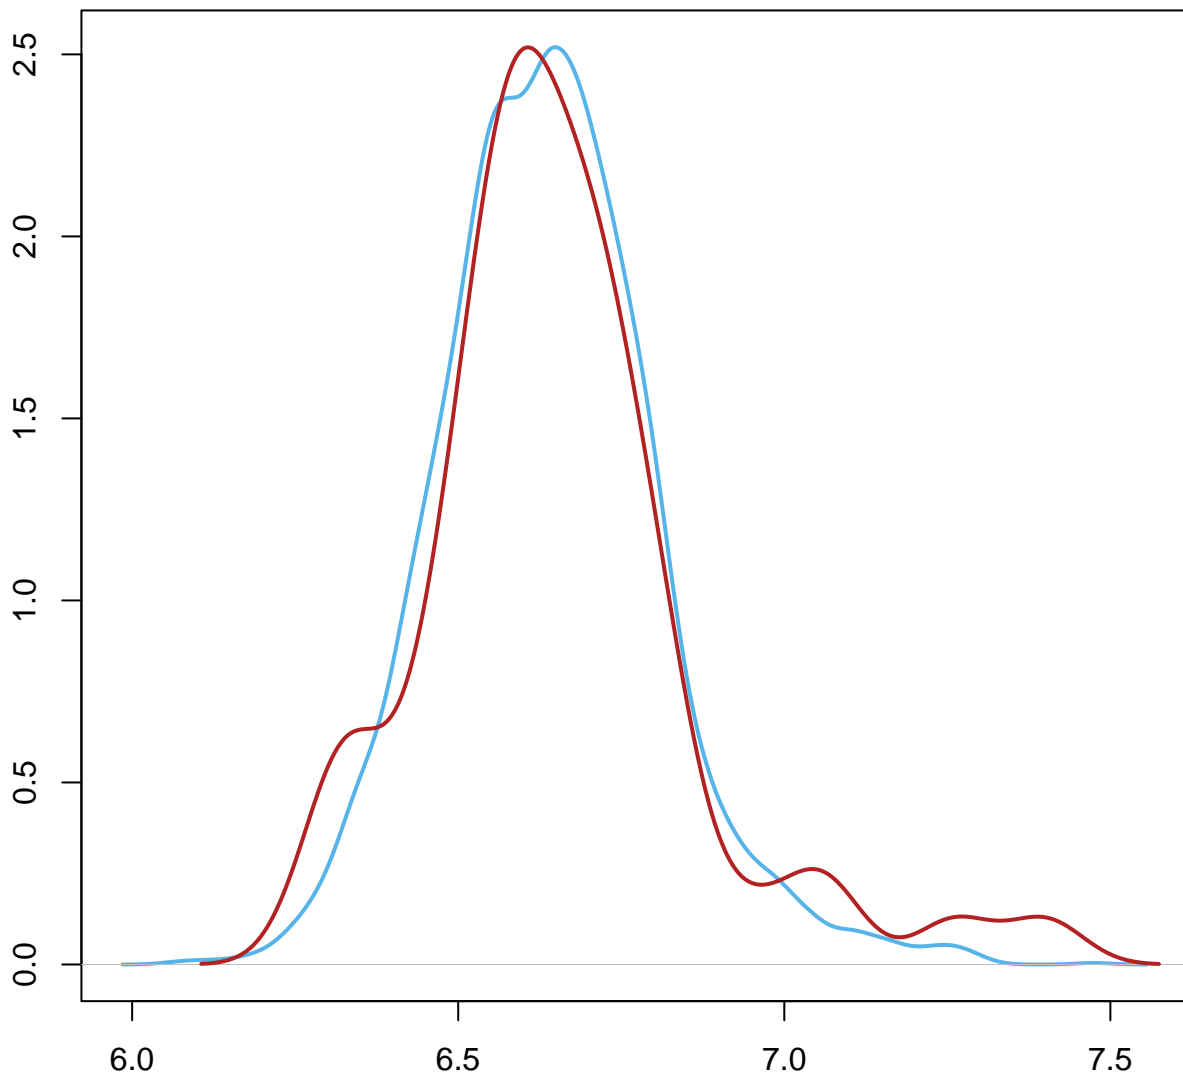

ln\_As

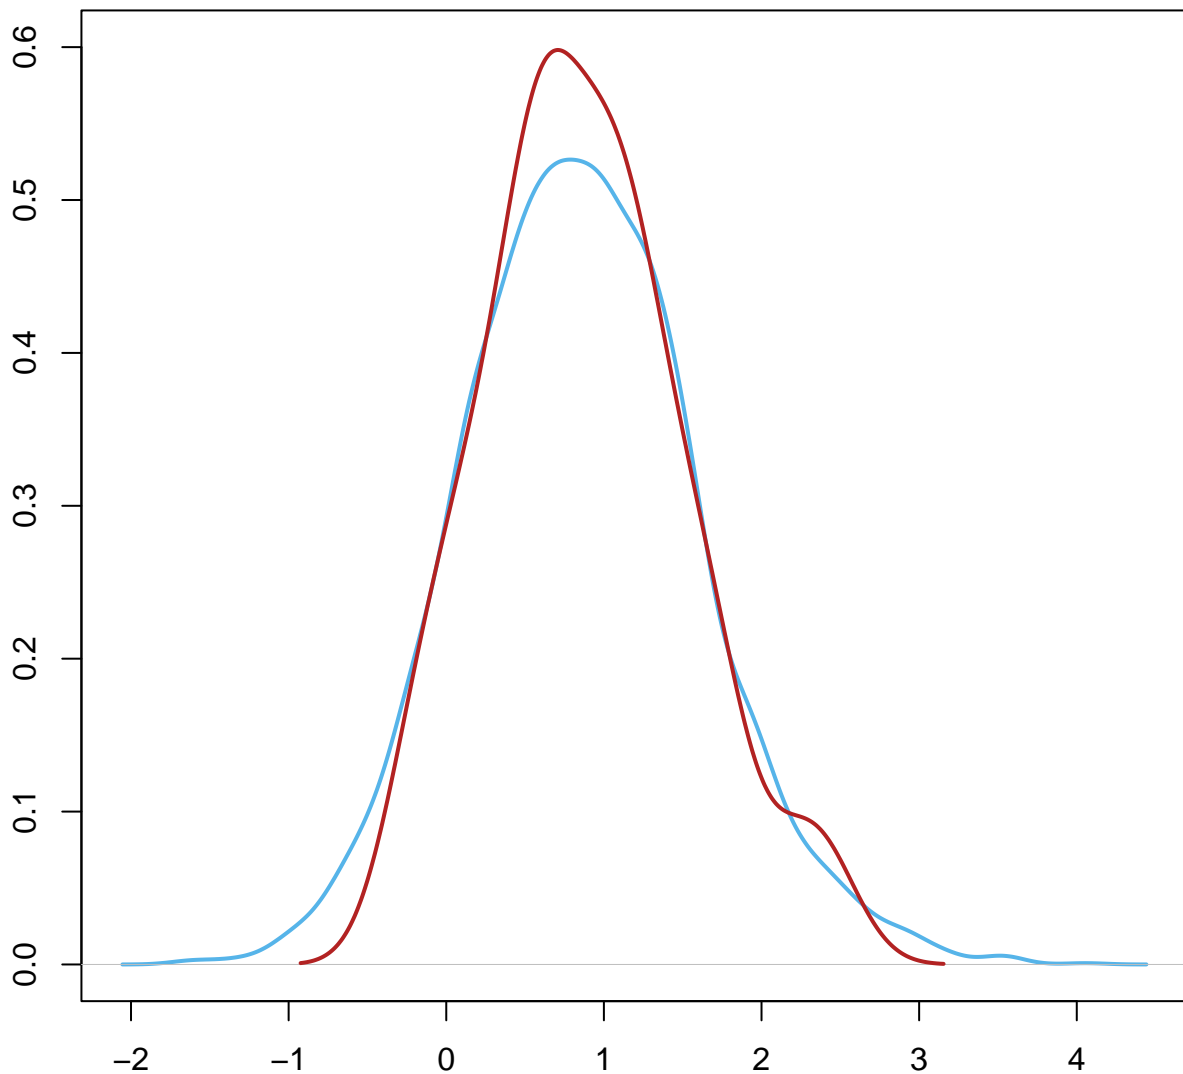

In\_Se

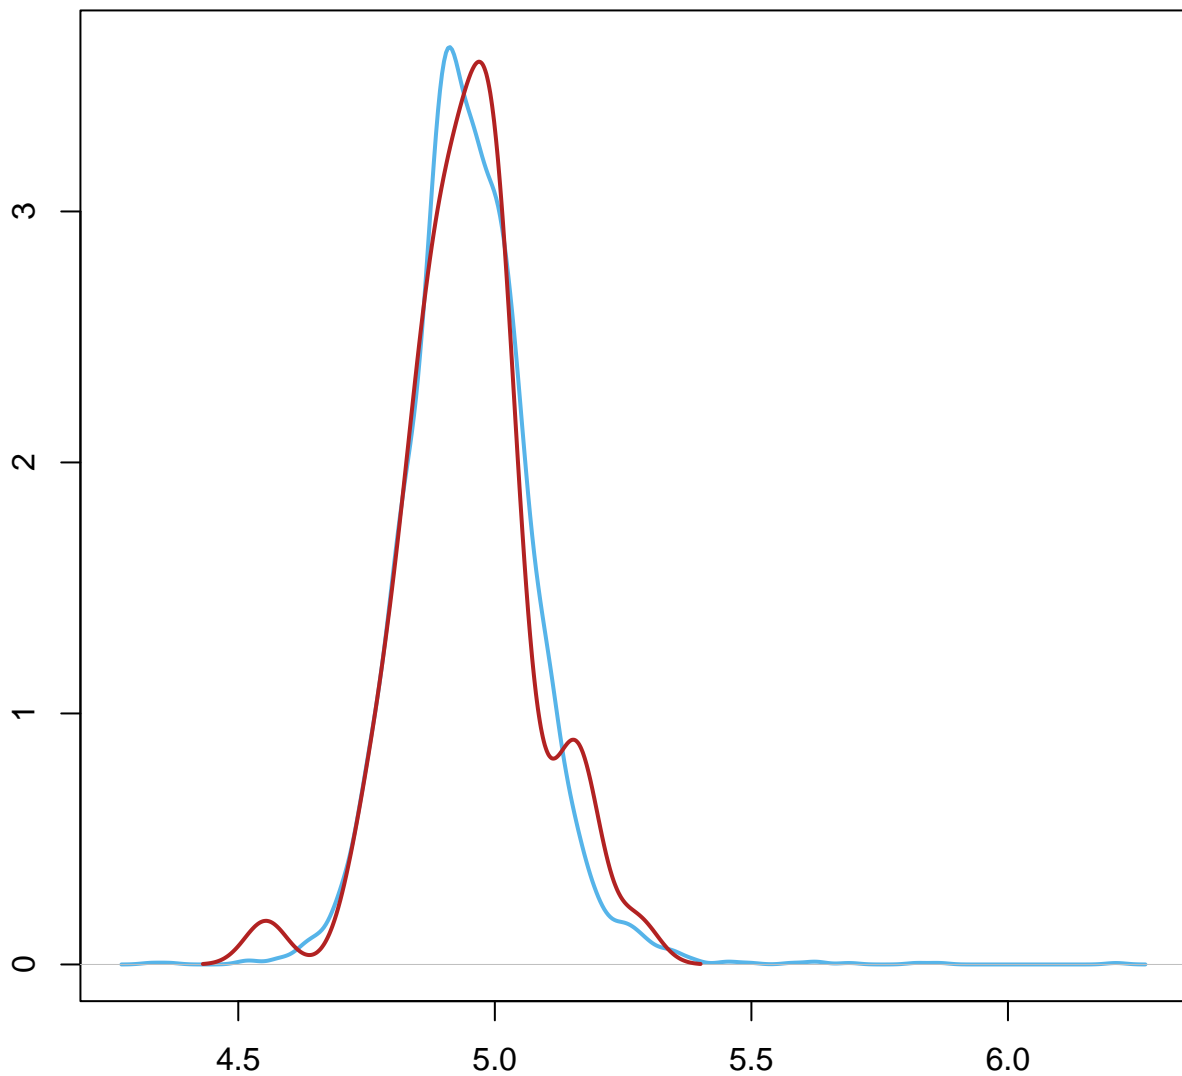

ln\_Rb

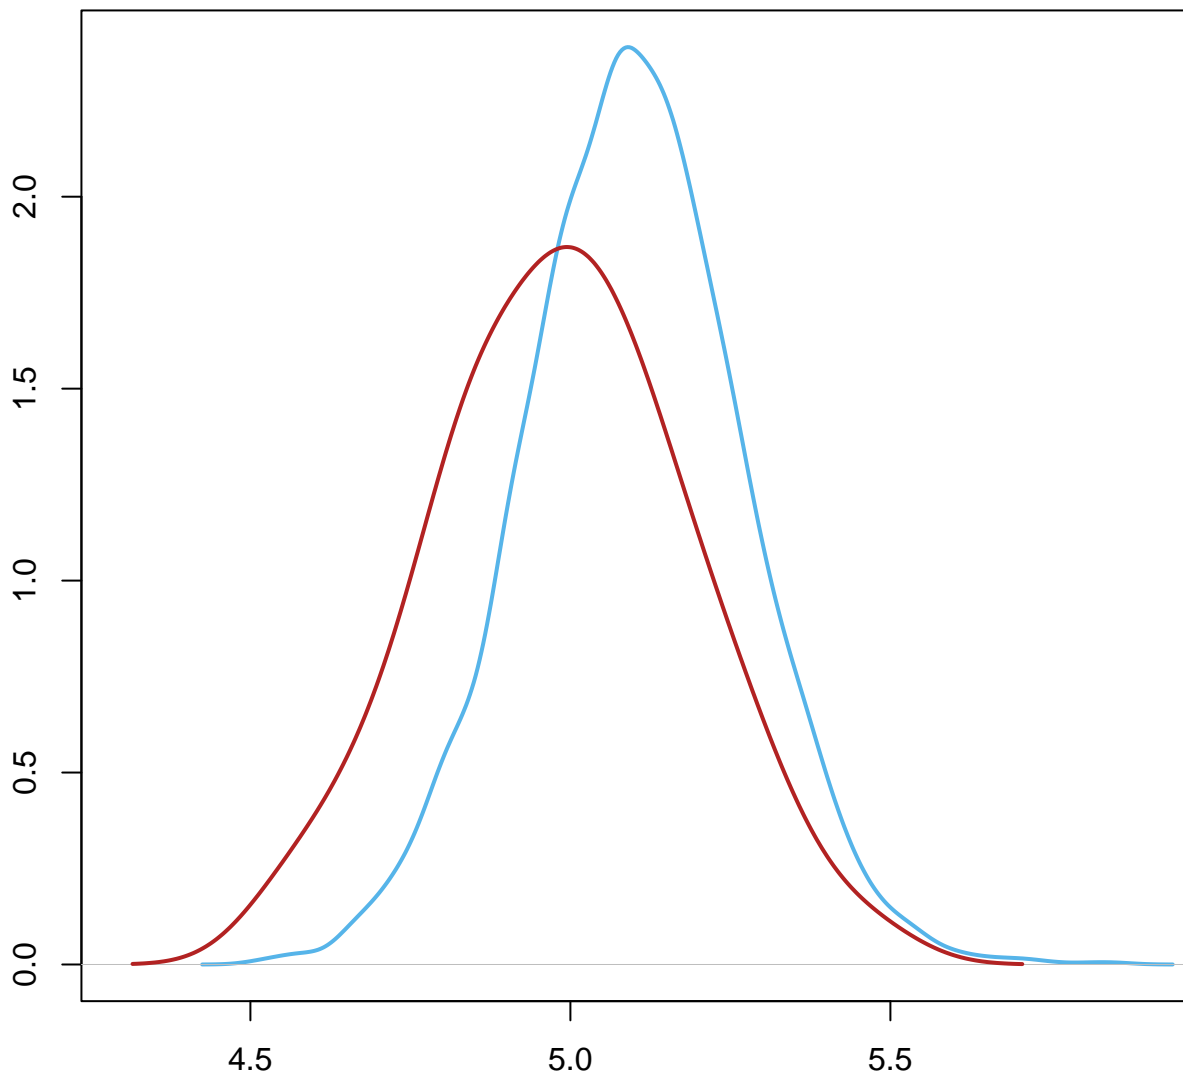

In\_Sr

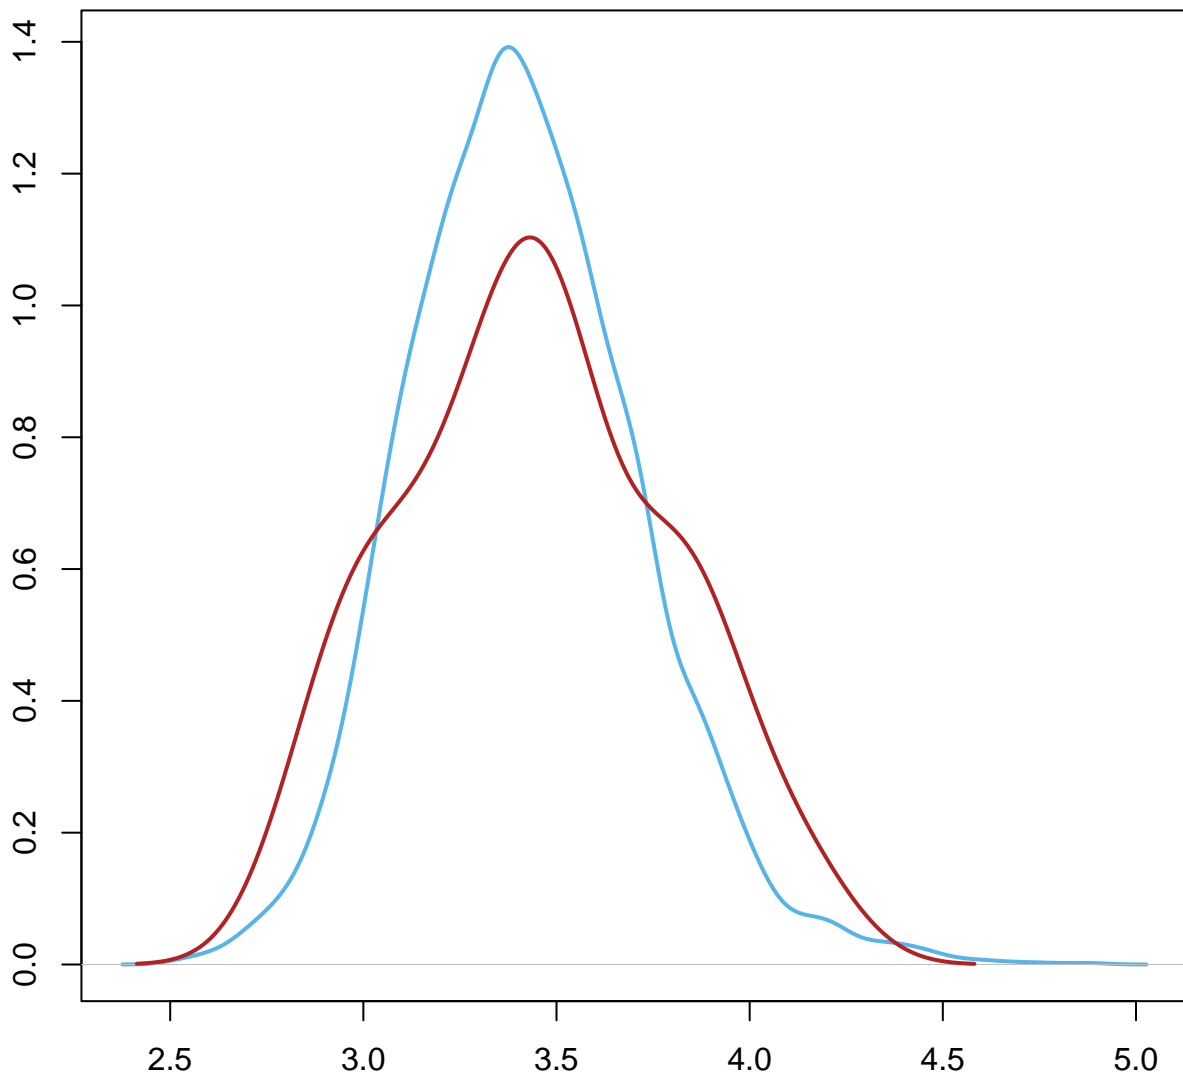

In\_Mo

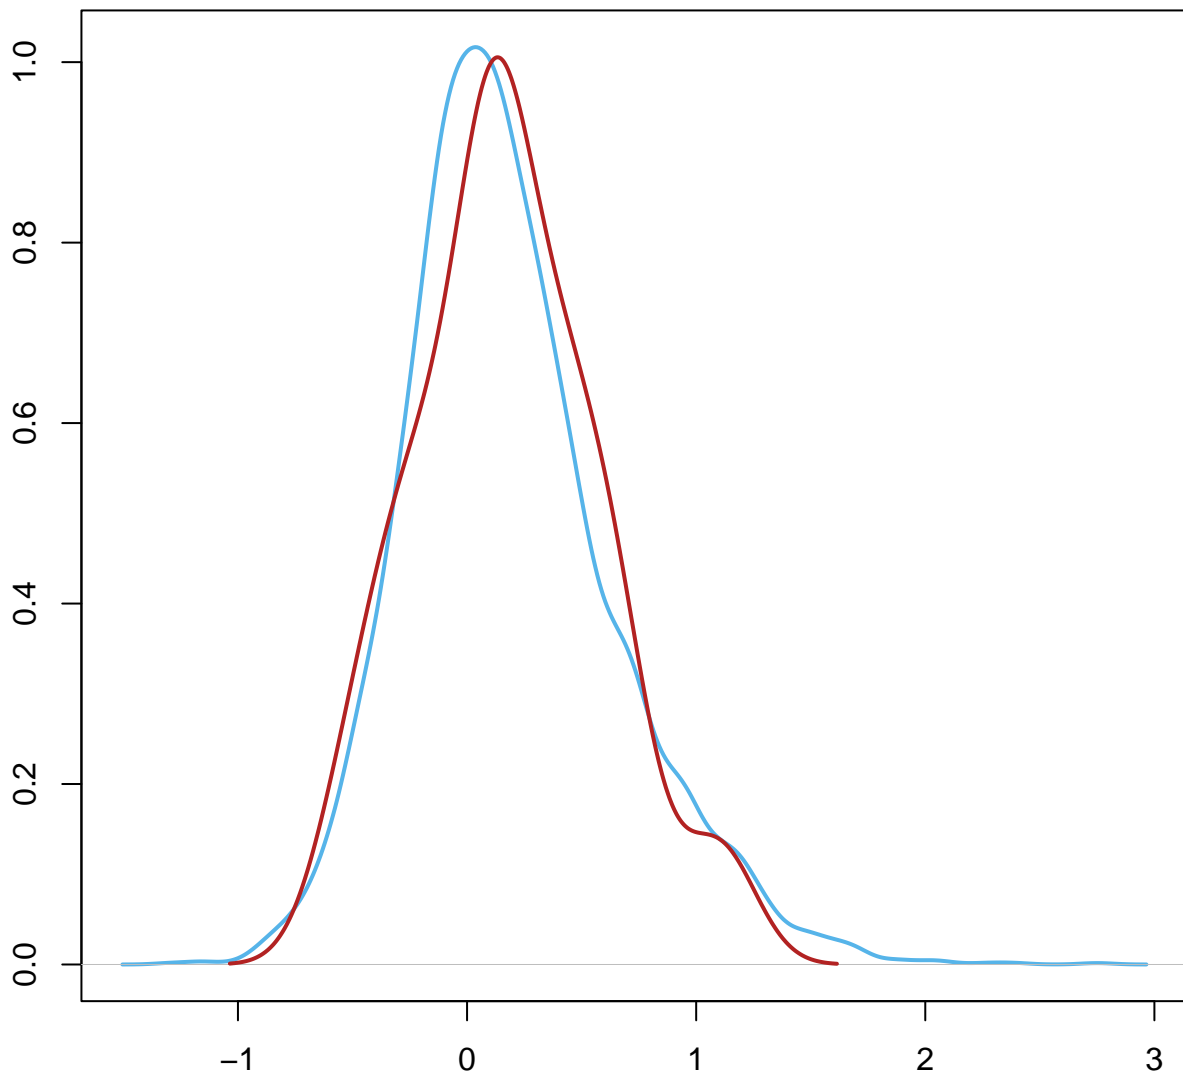

In\_Ag

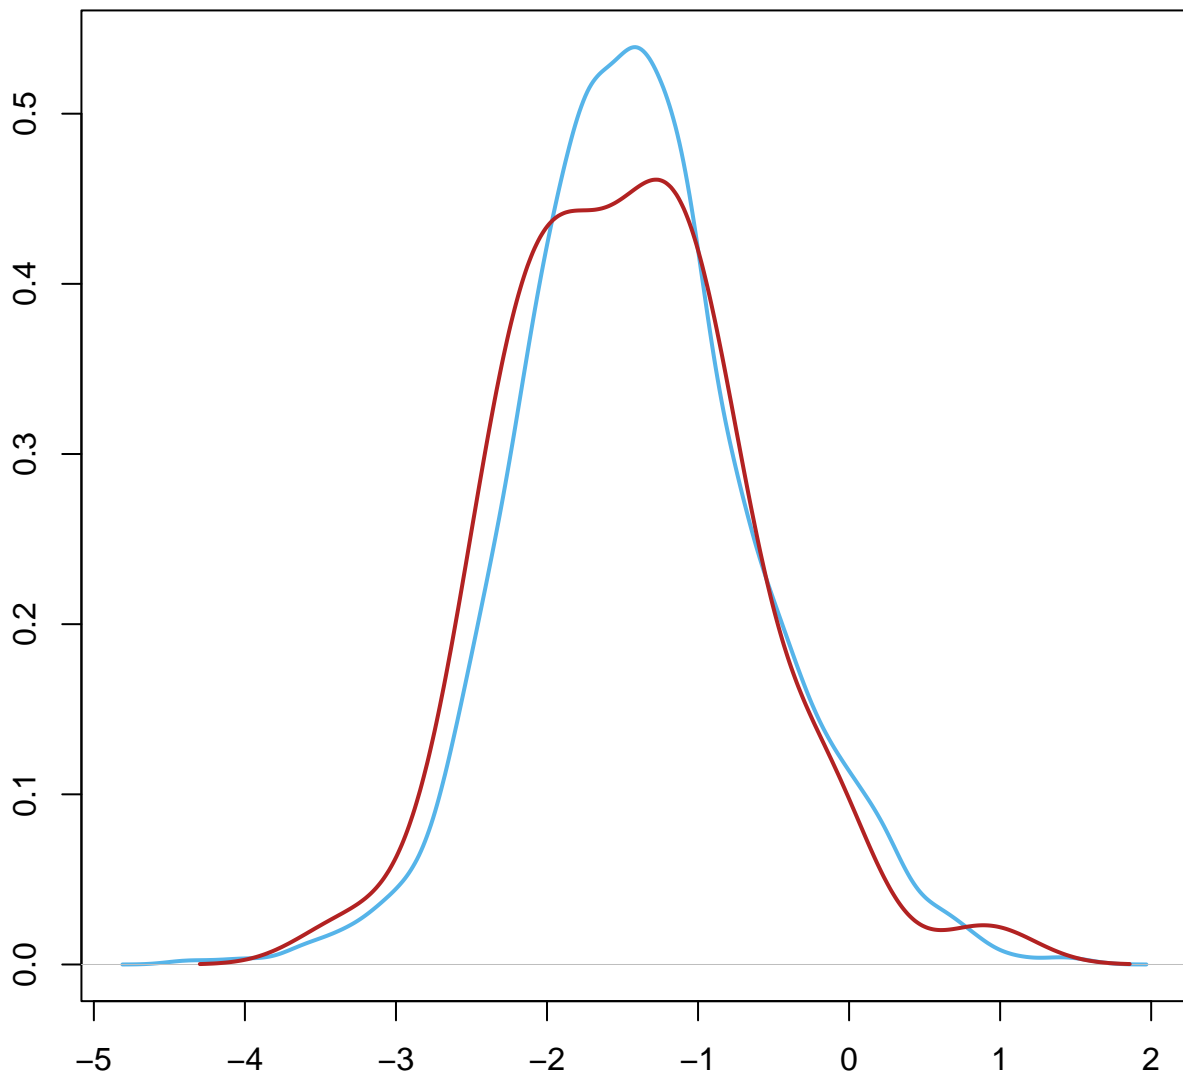



**ln\_Cs**

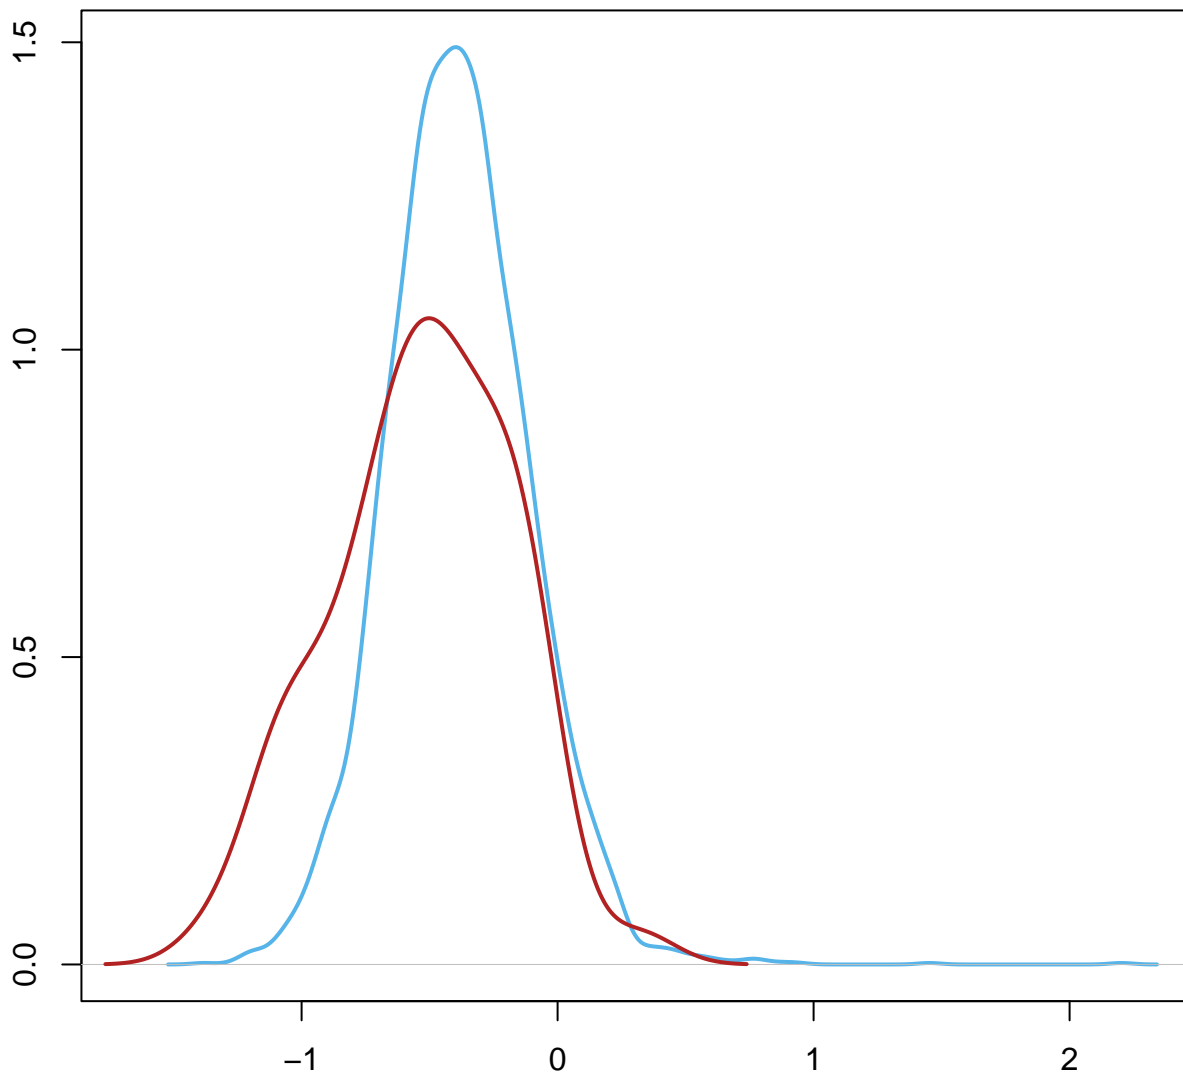

Supplement: Supporting_Figure_1.zip [file Supporting_Figure_1.zip]

In\_Na

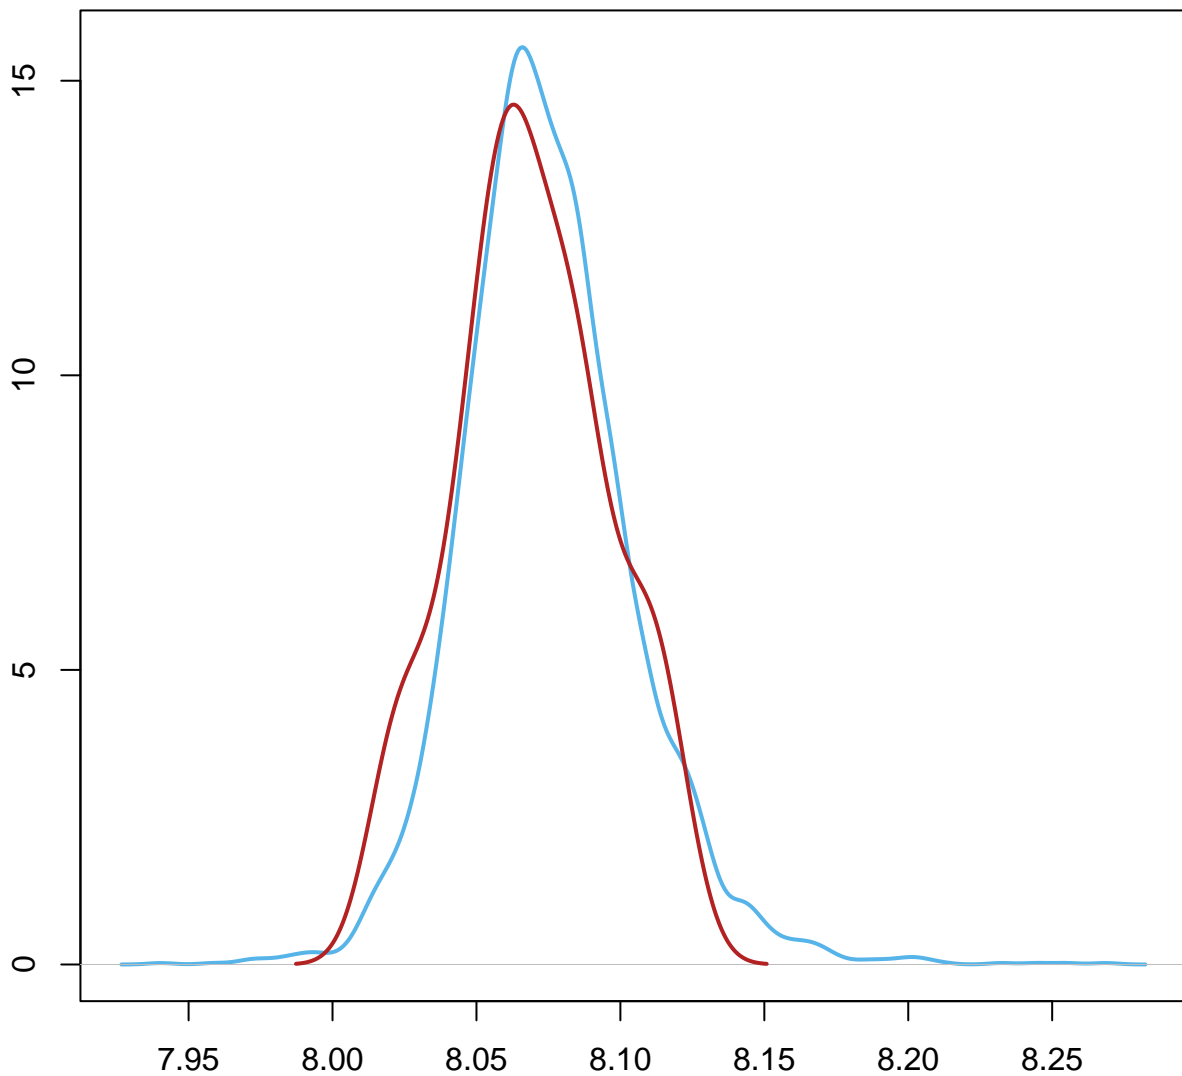

ln\_Mg

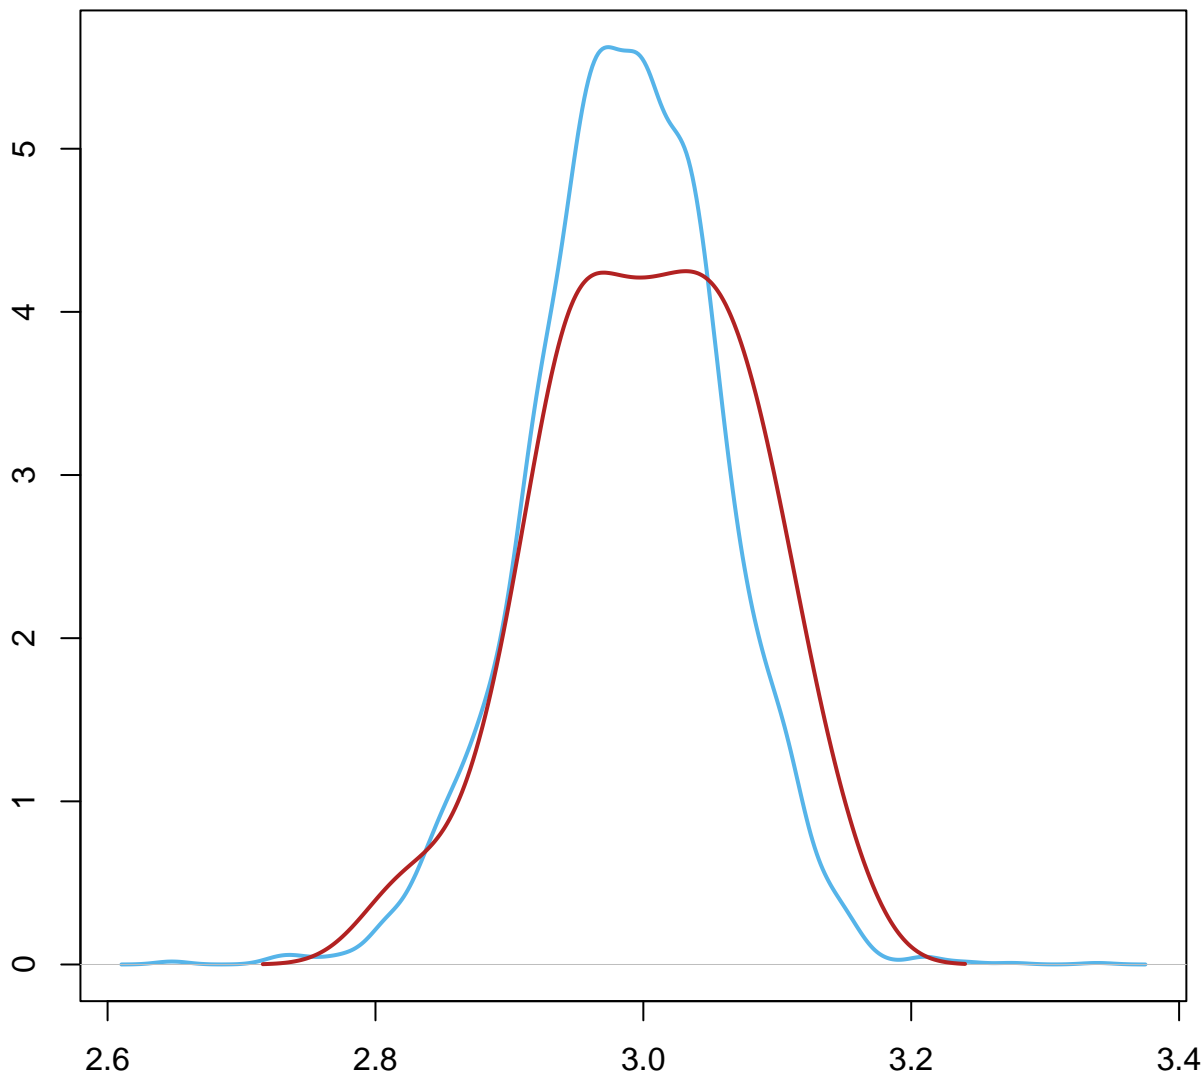

ln\_P

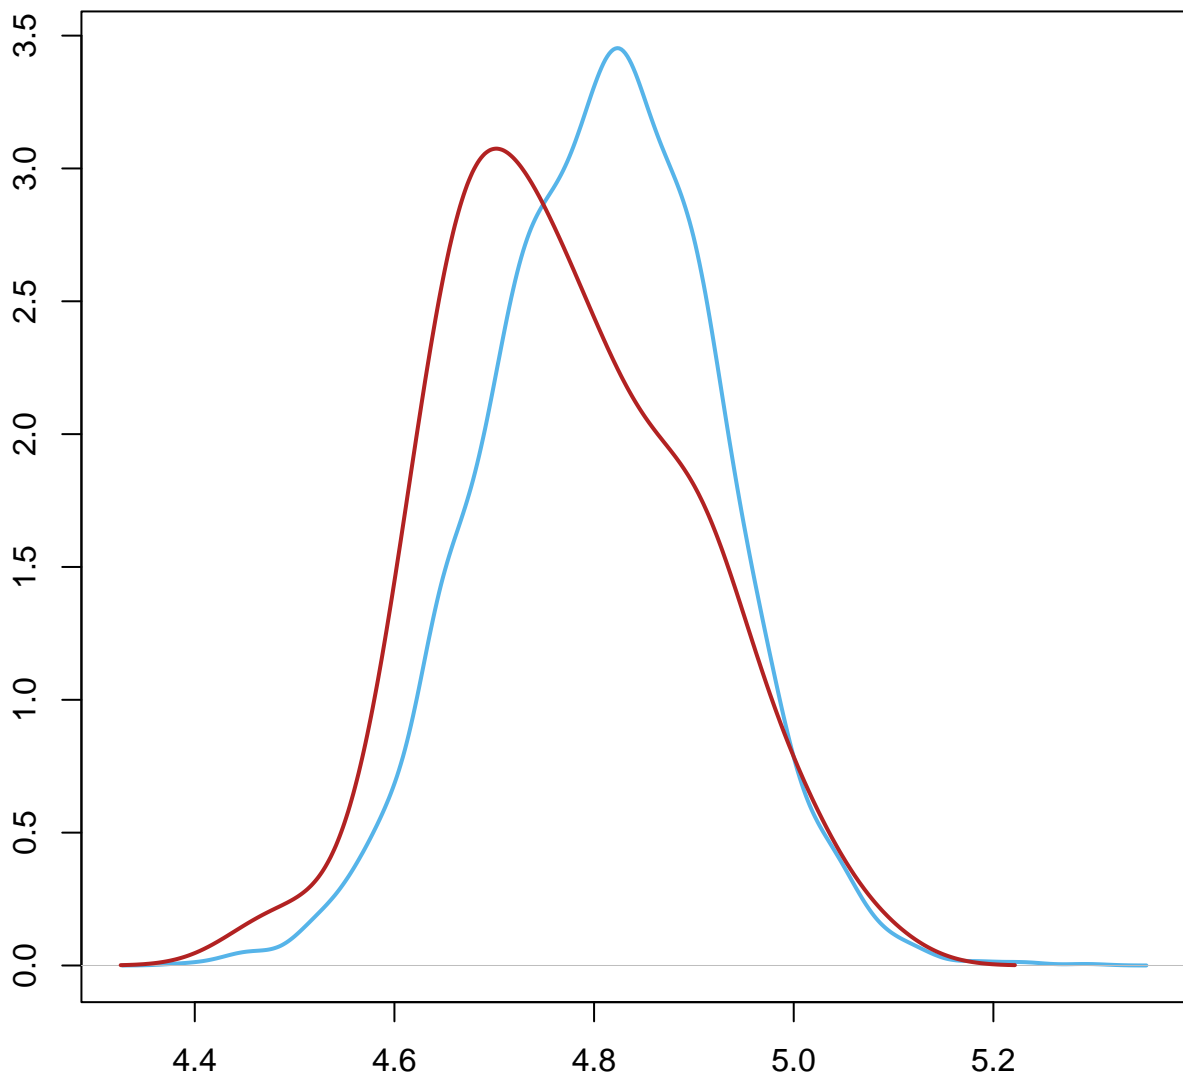

$\ln_S$

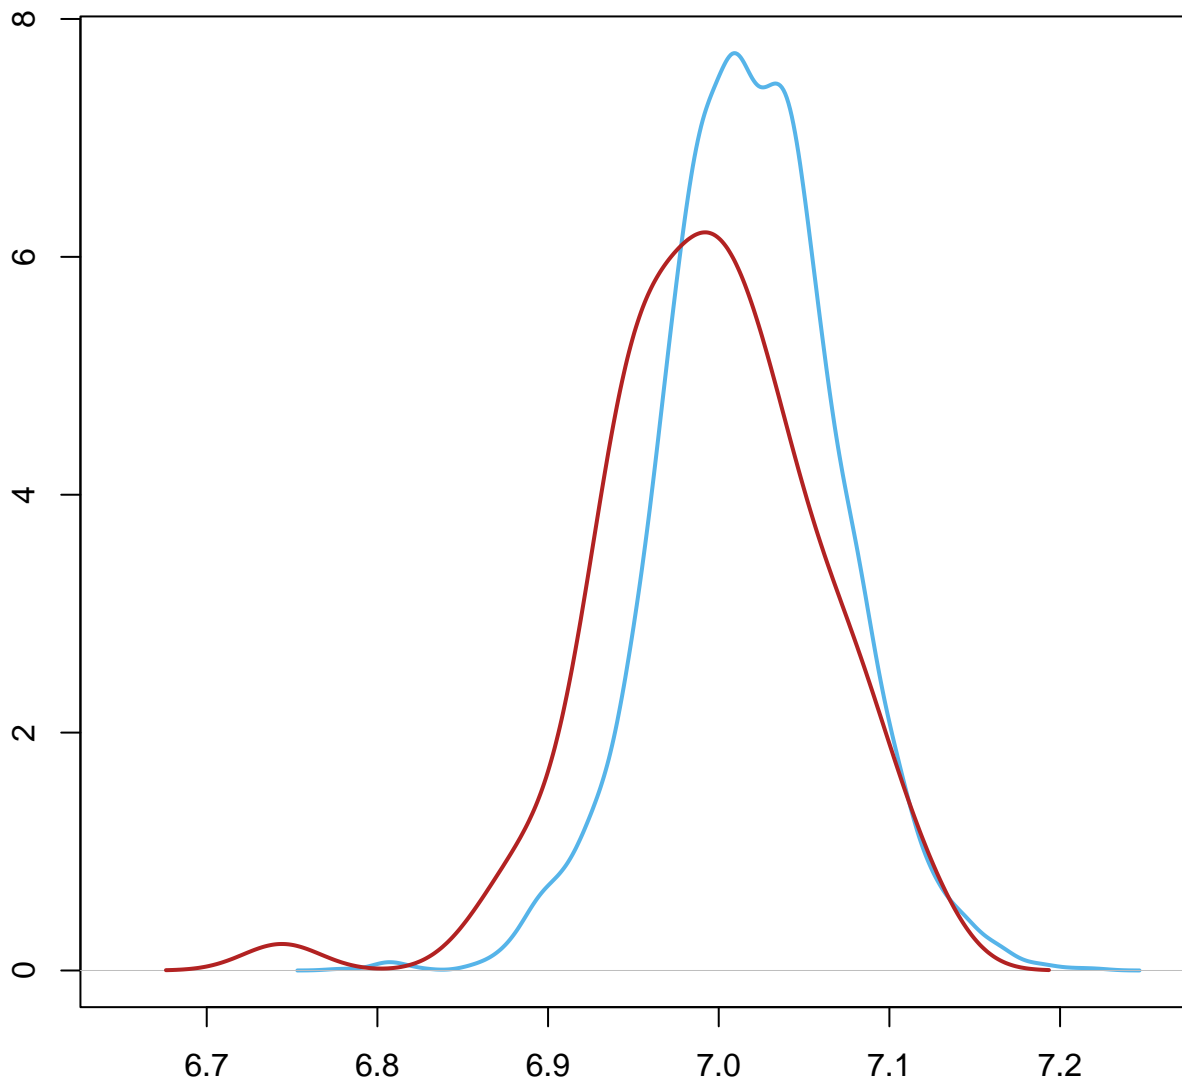

ln\_K

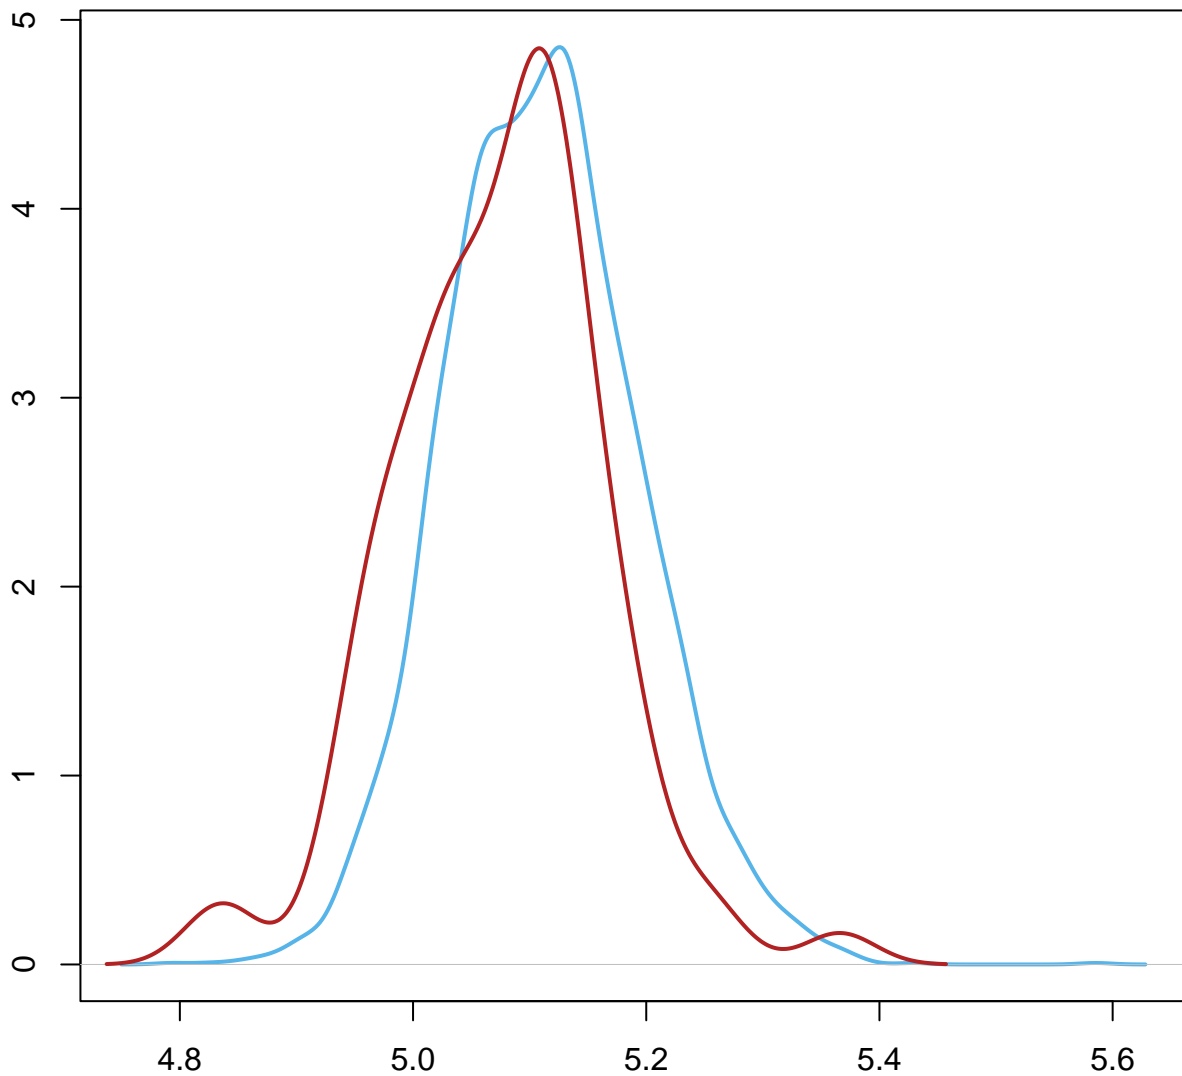

In\_Ca

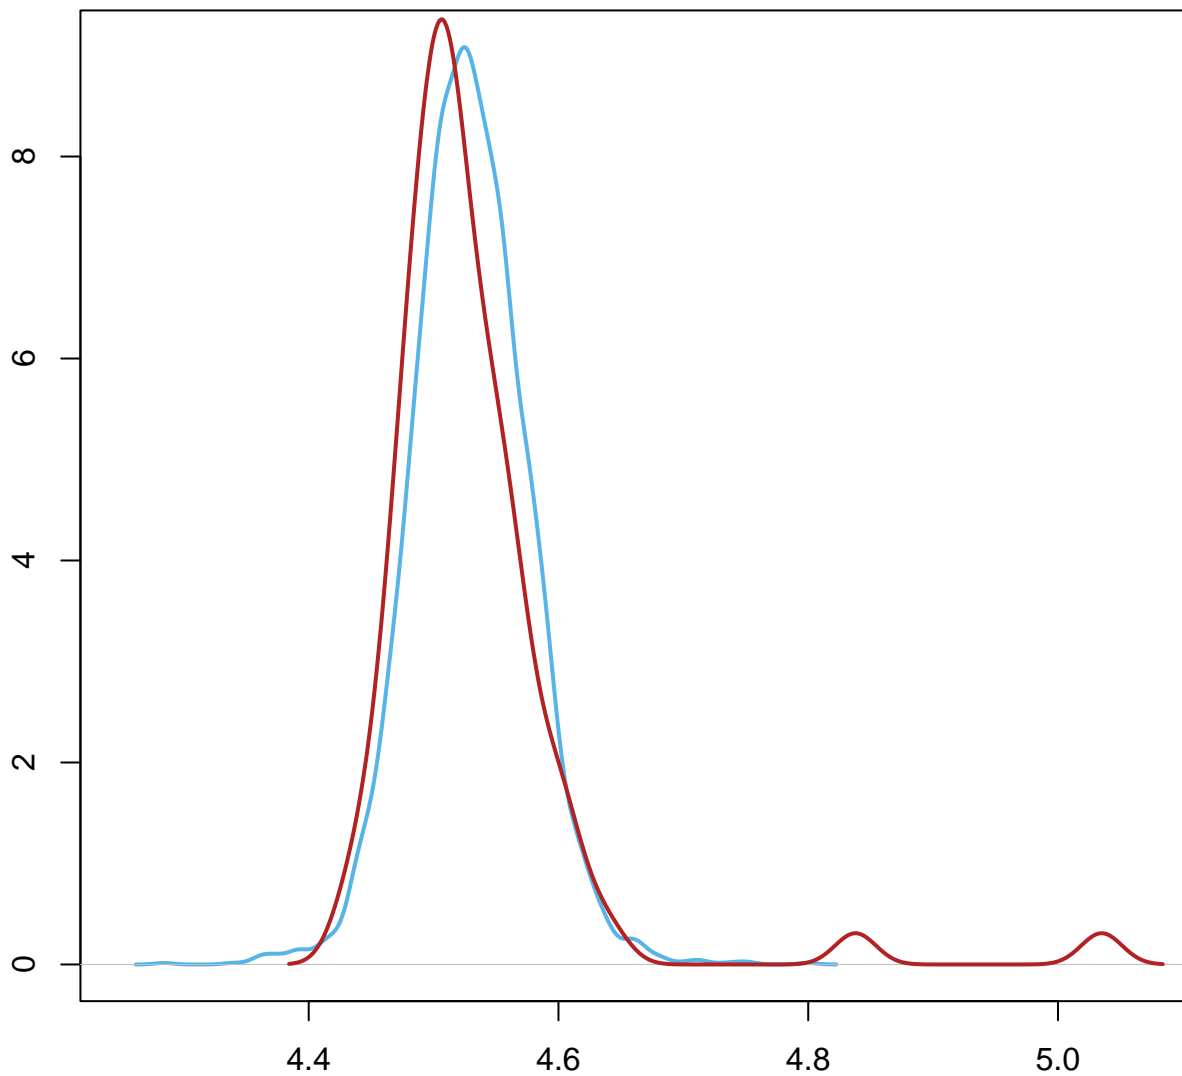

In\_Fe

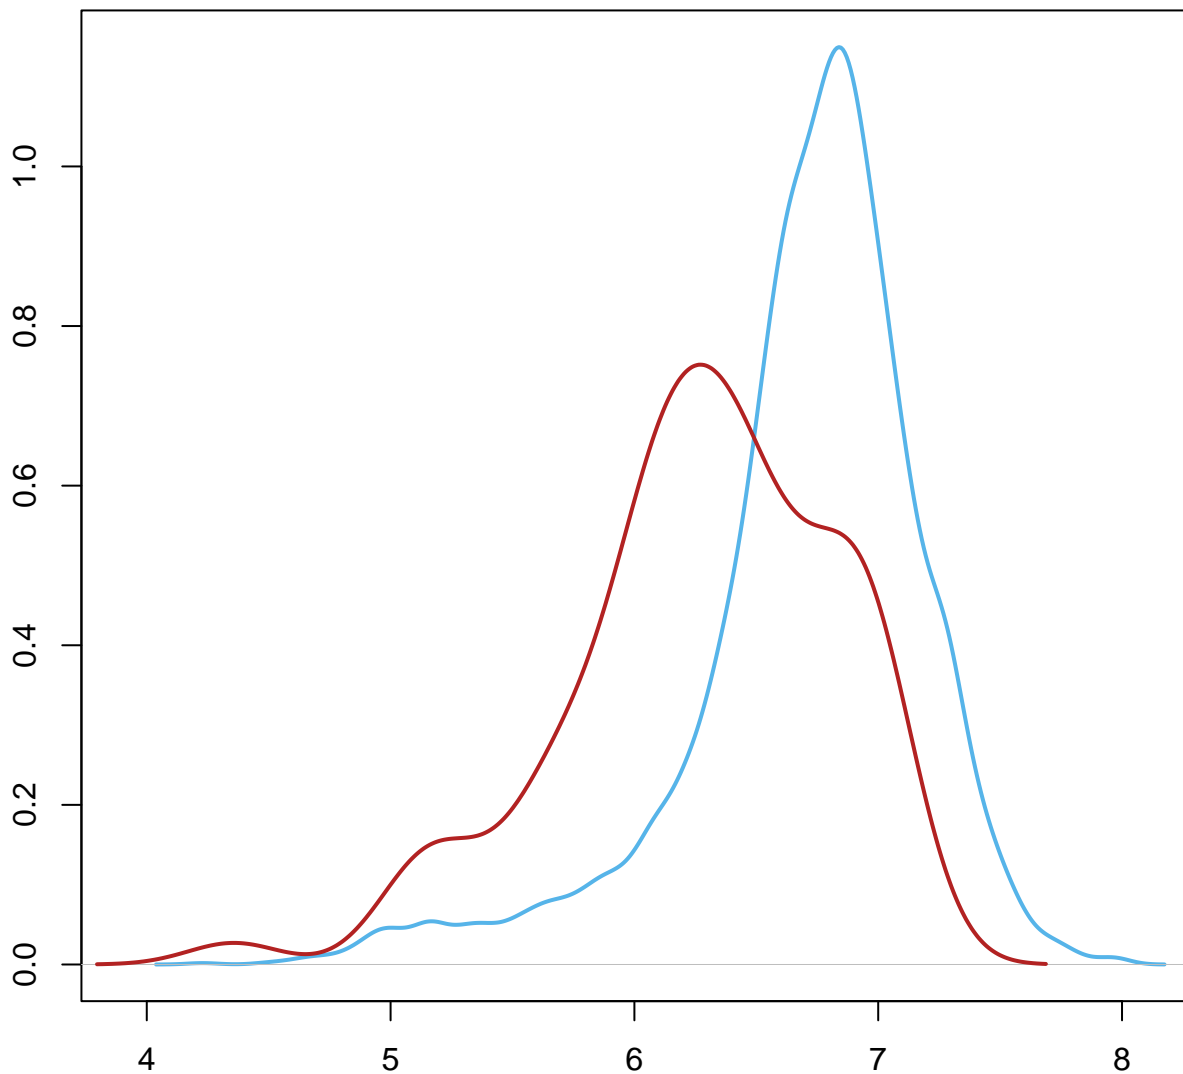

In\_Co

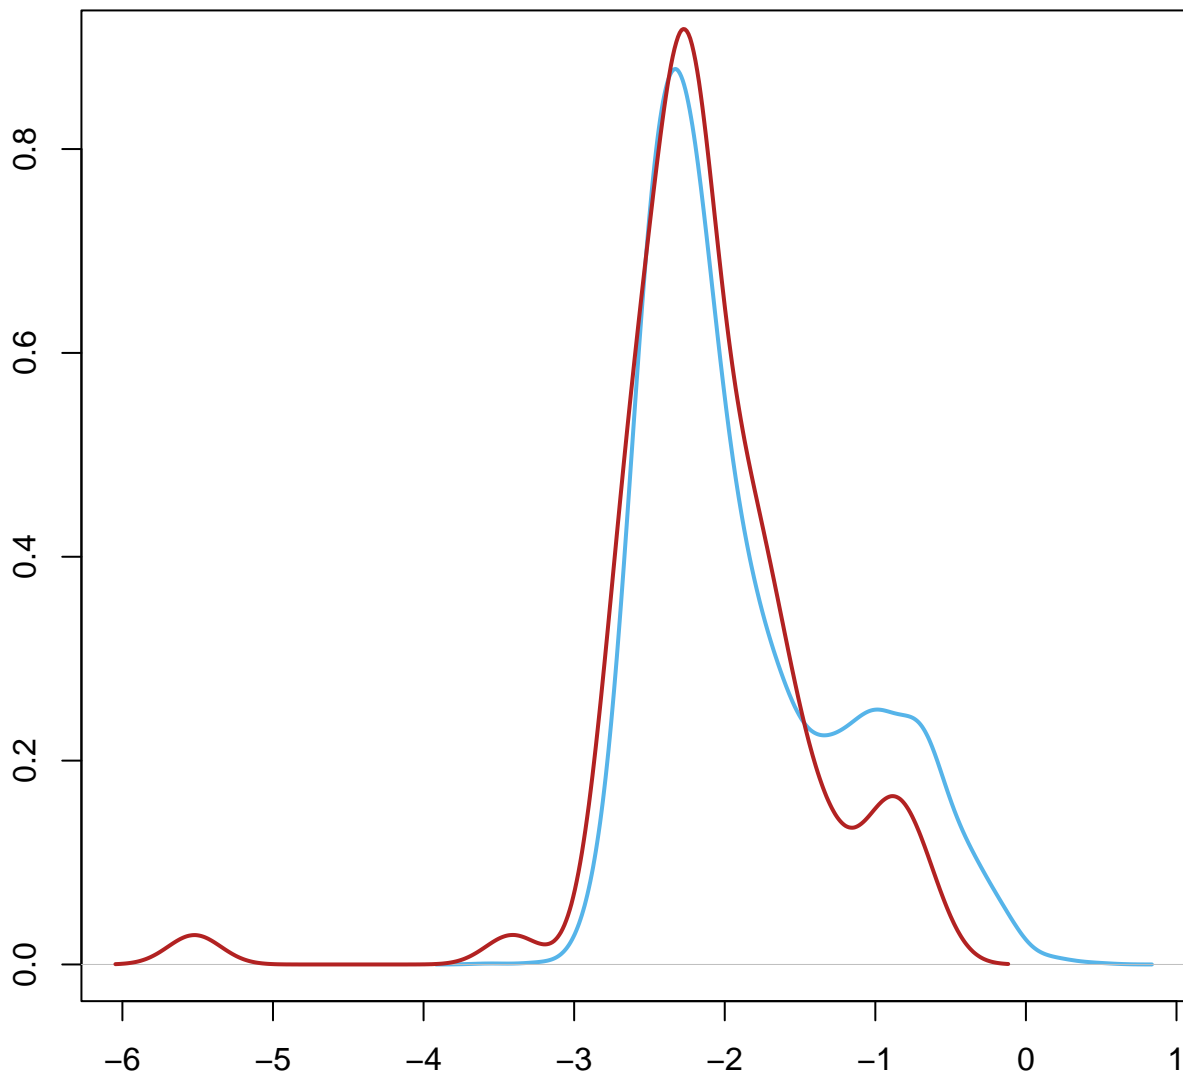



In\_Cu

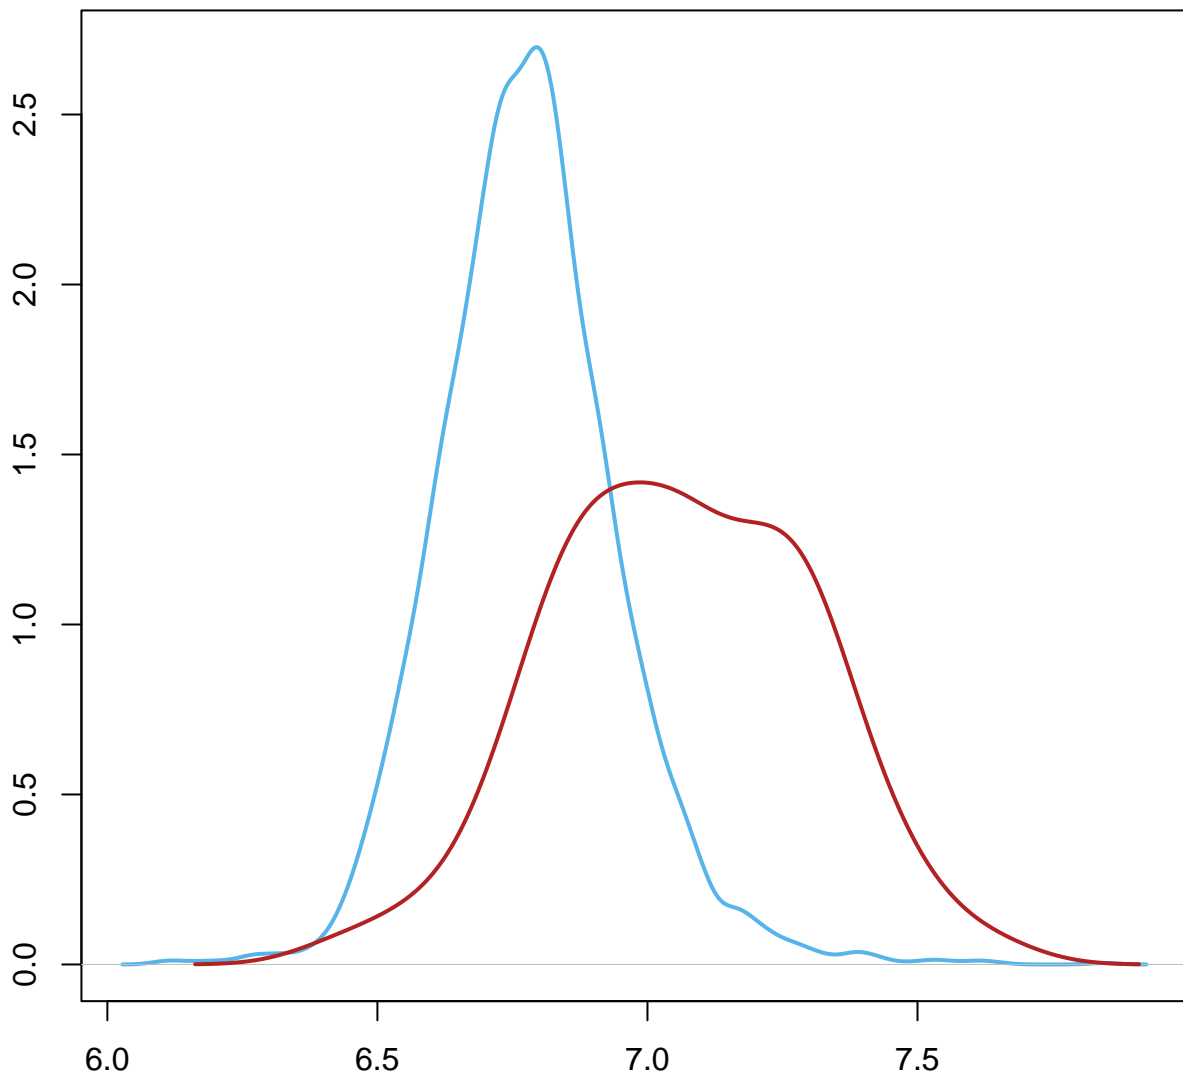

ln\_Zn

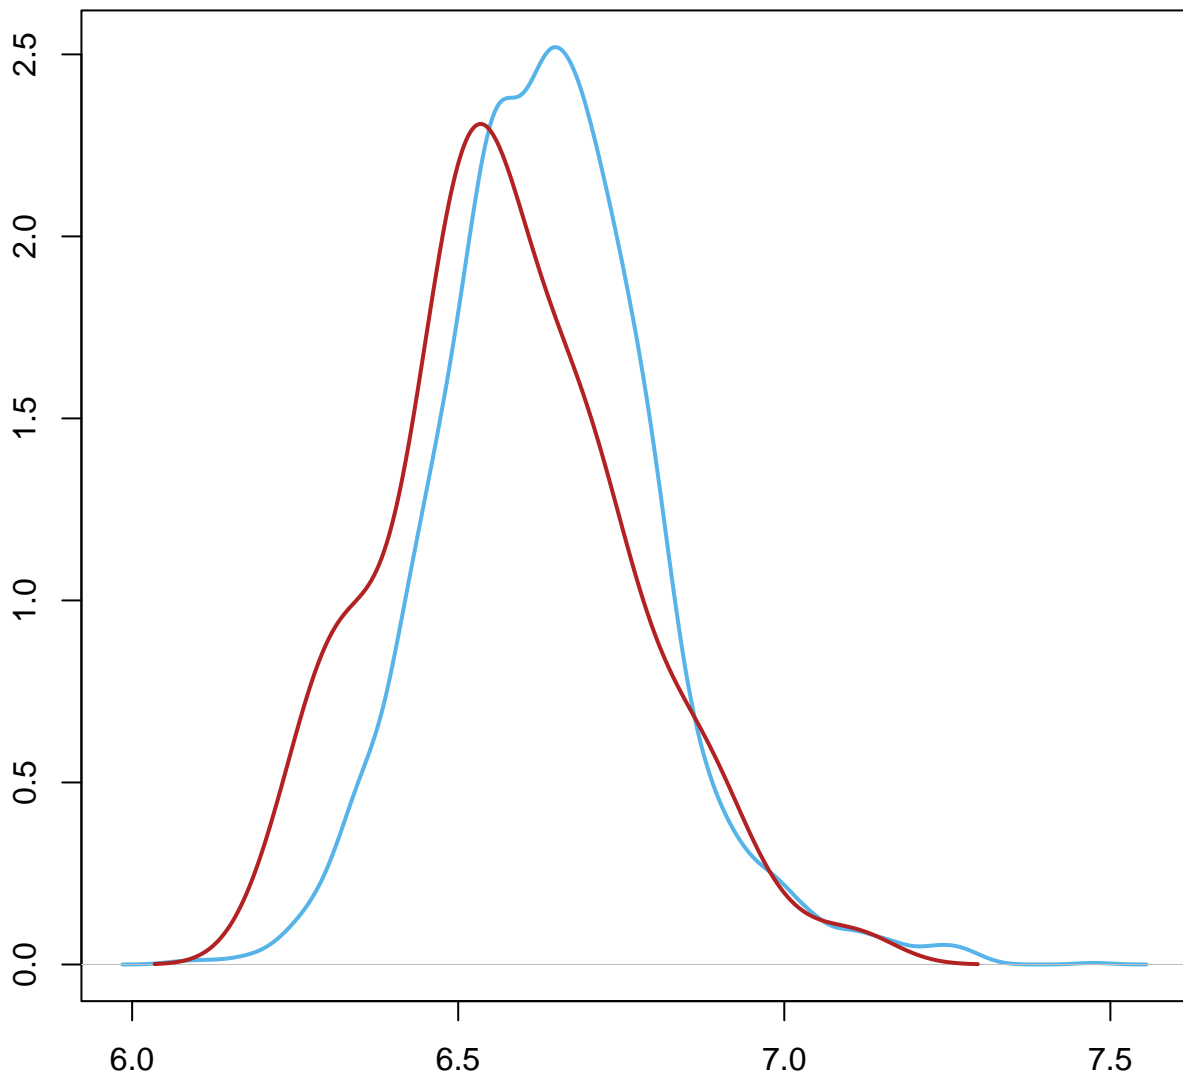

**ln\_As**

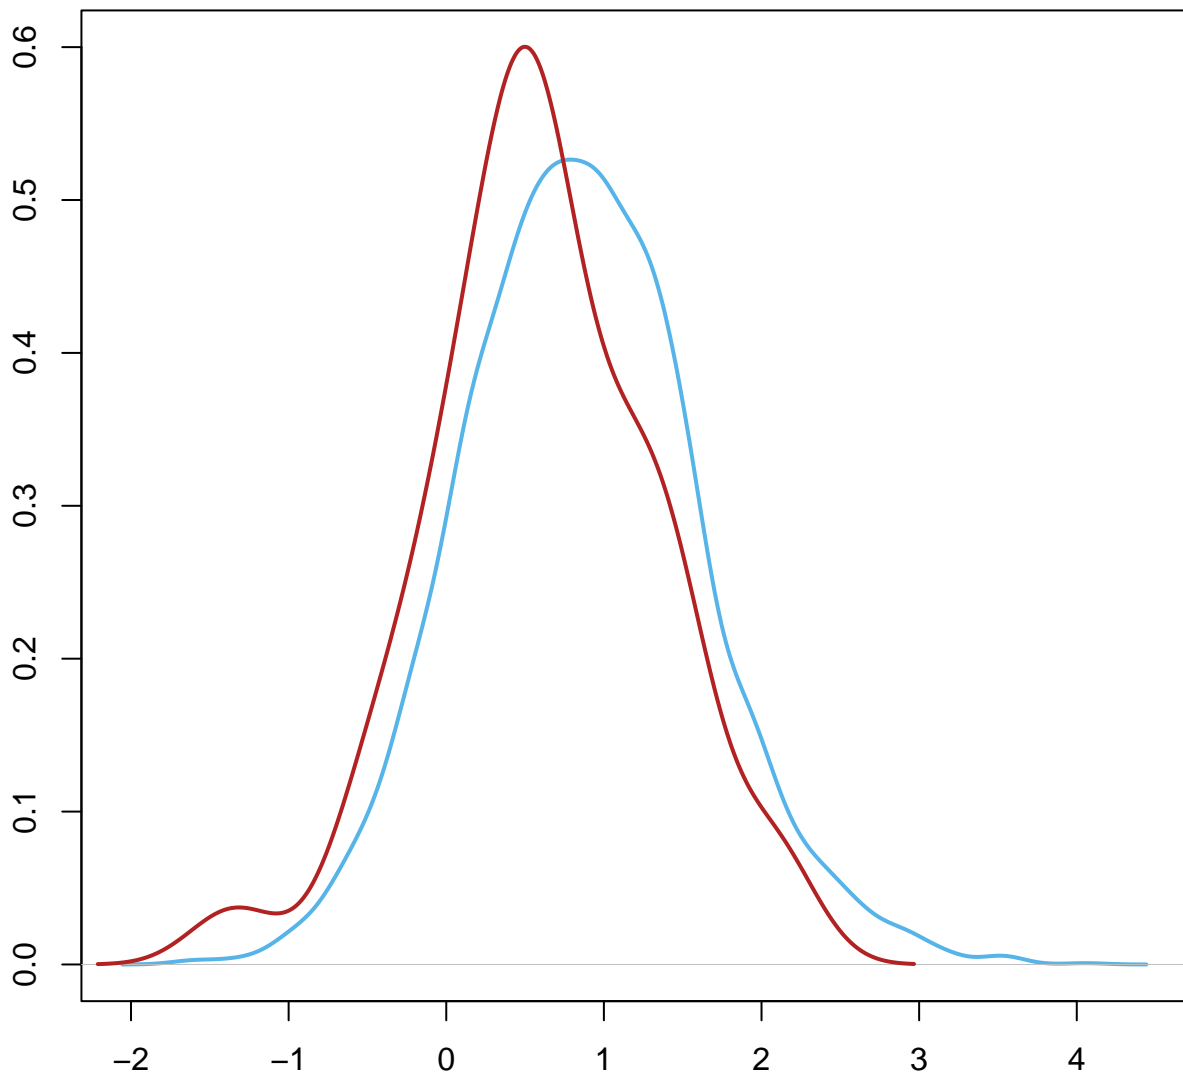

In\_Se

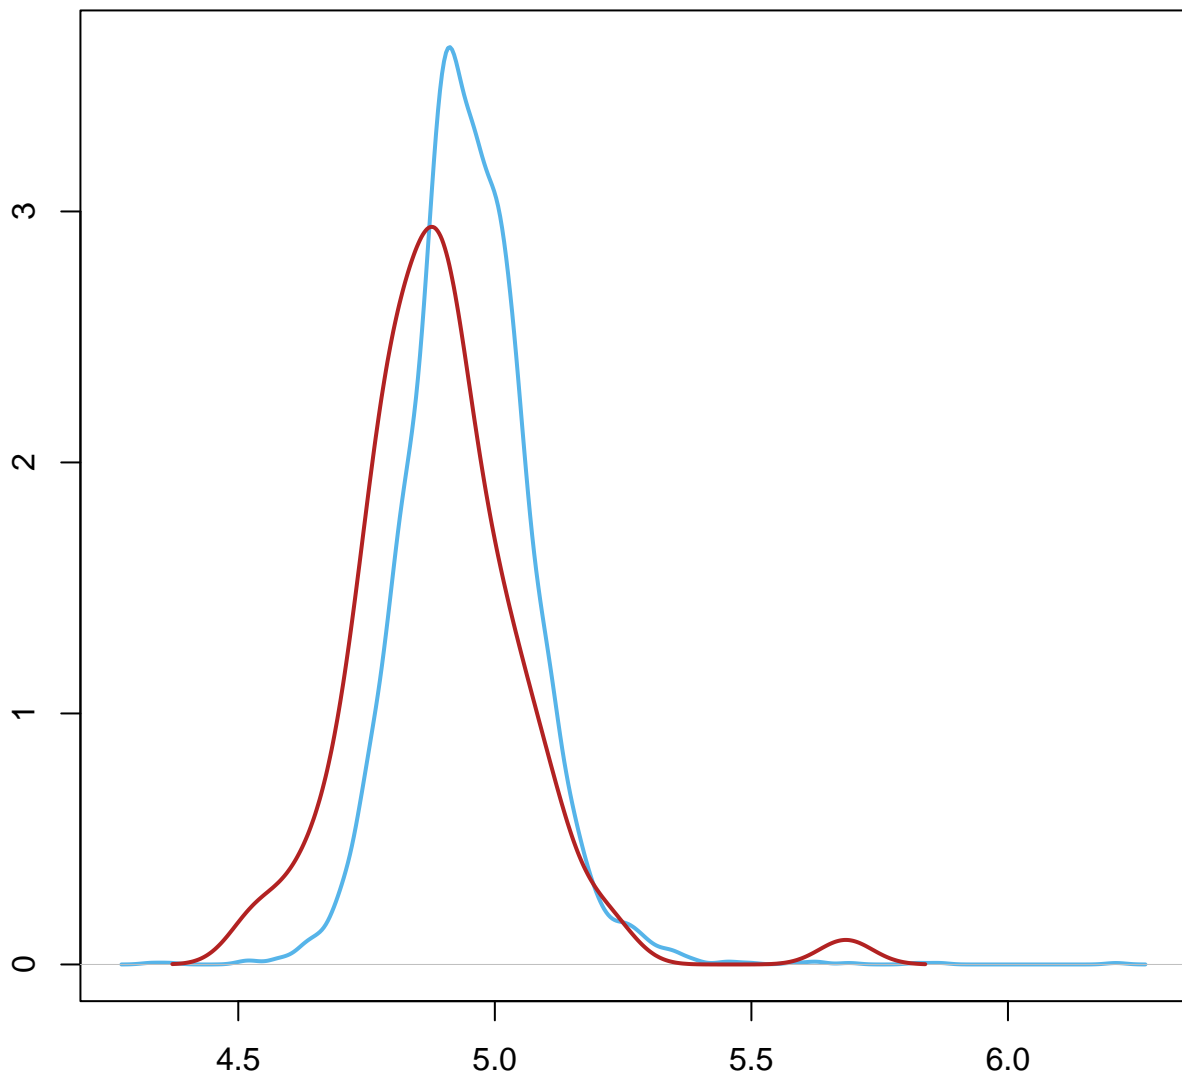

In\_Rb

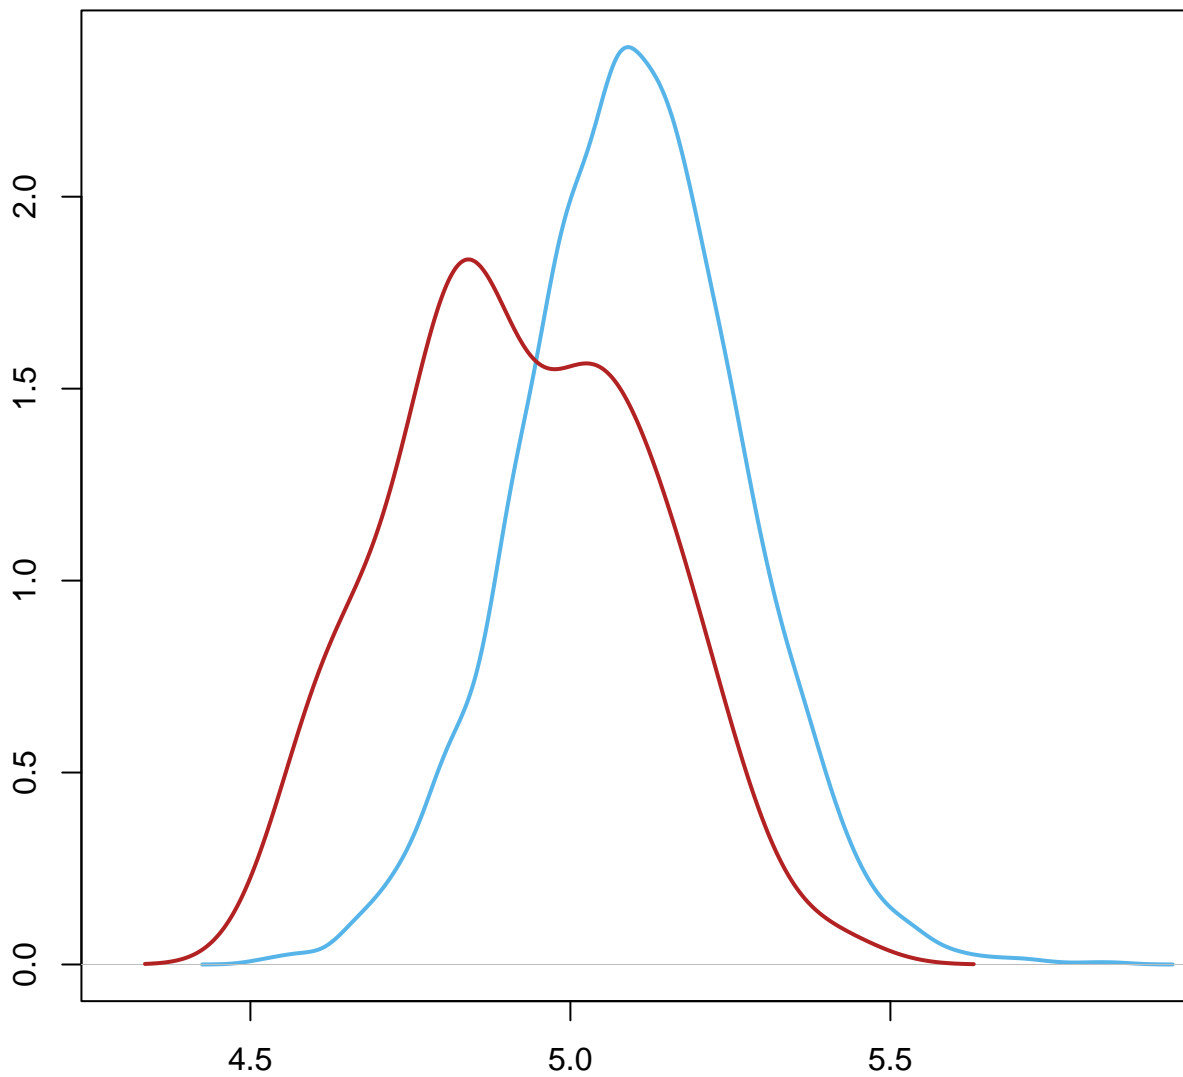

In\_Sr

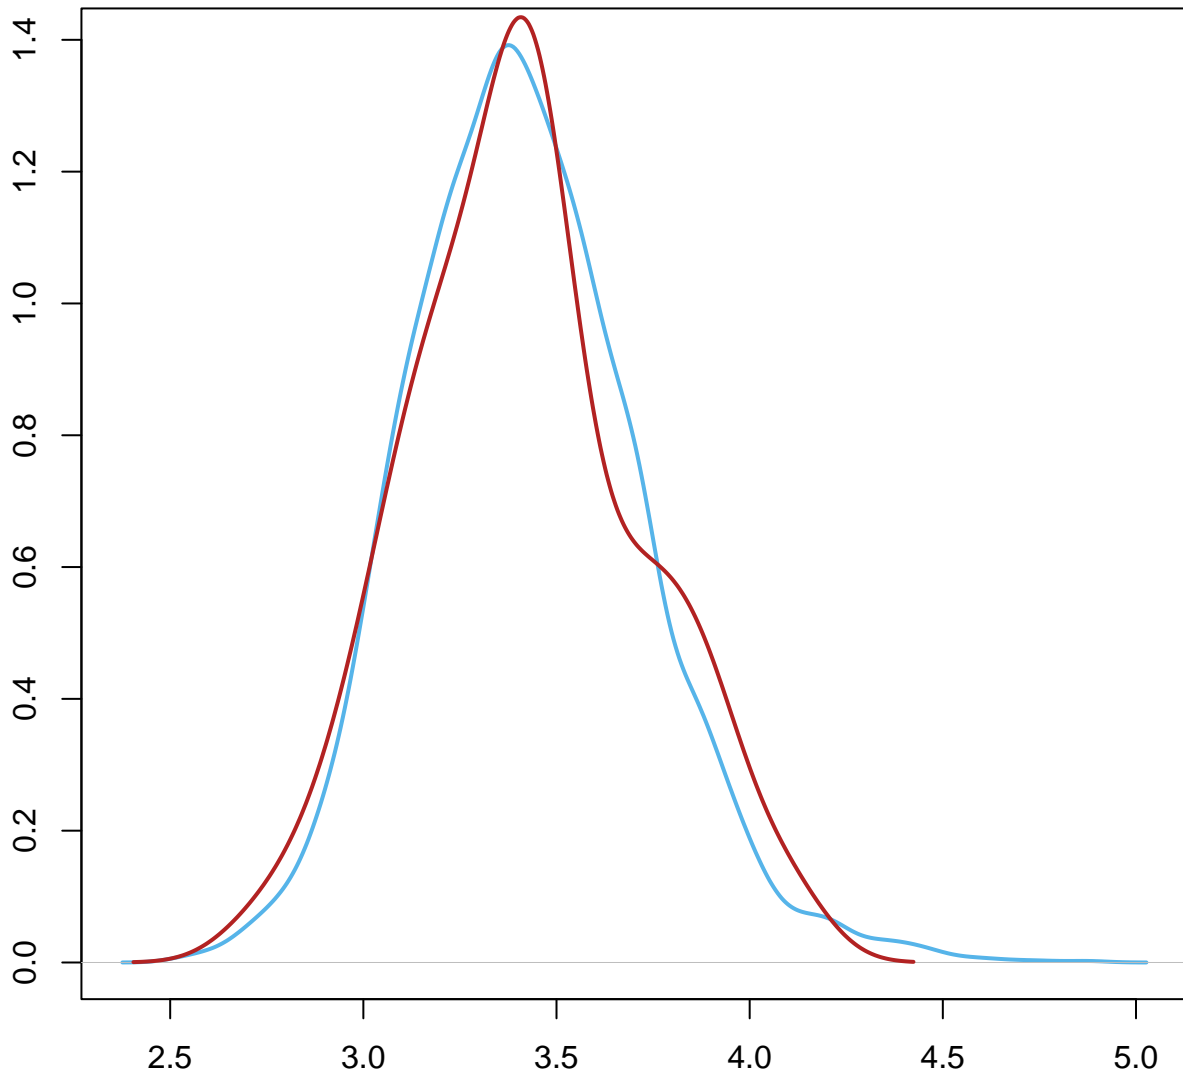

In\_Mo

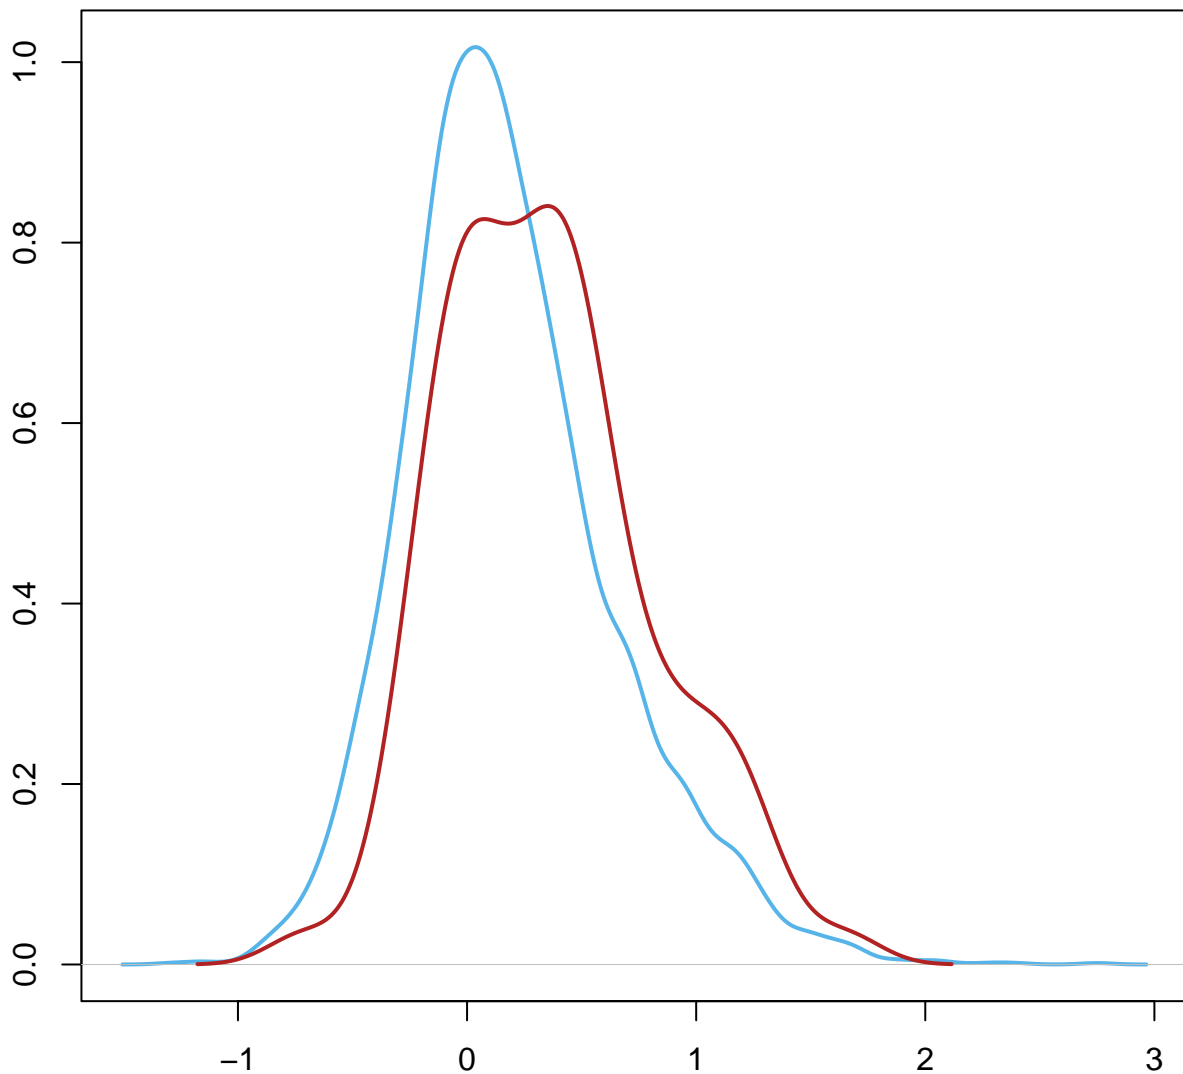

**In\_Ag**

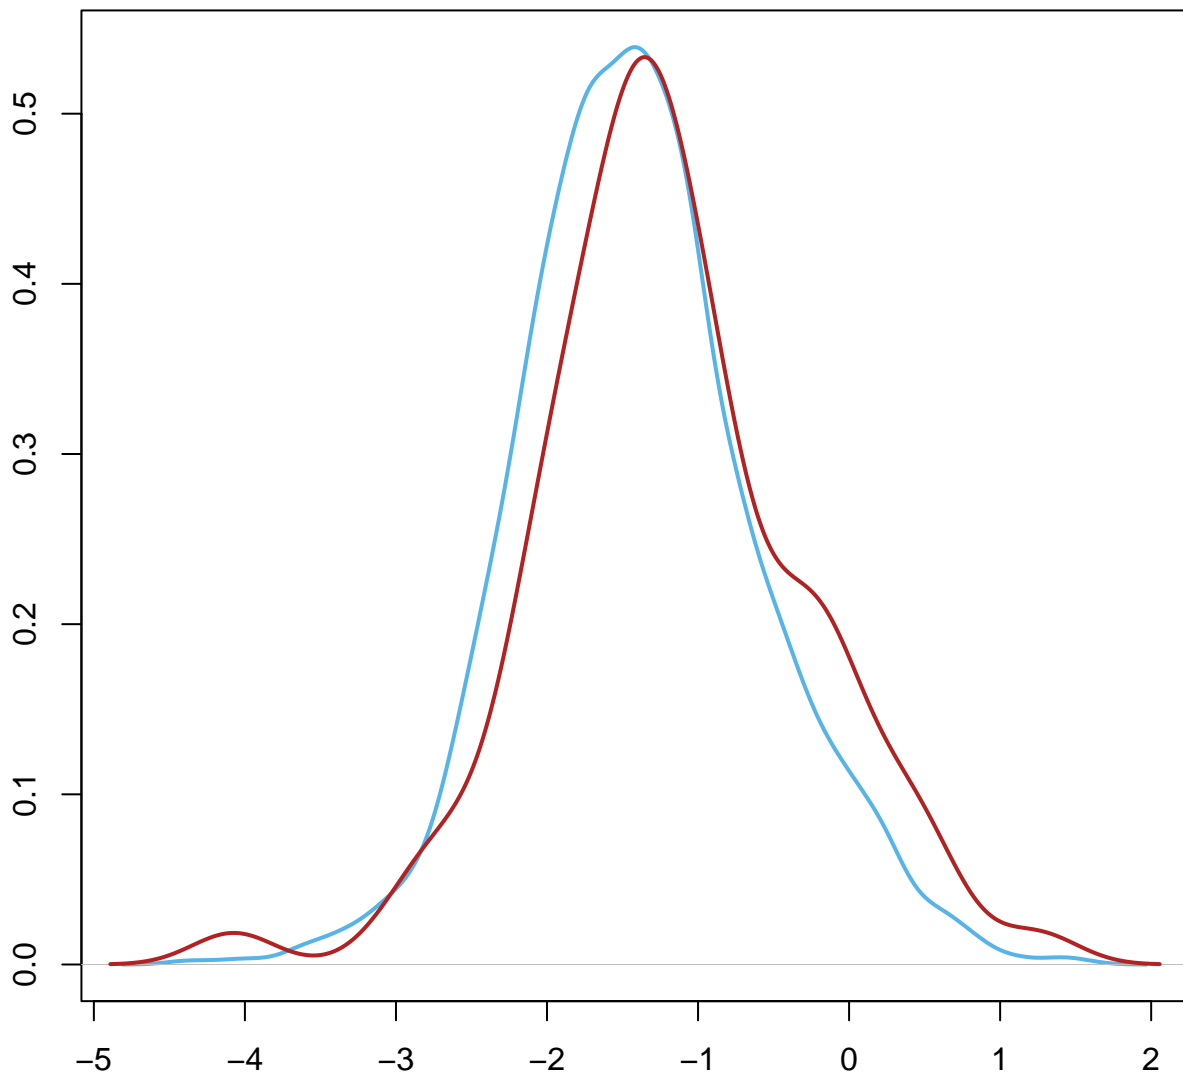



ln\_Cs

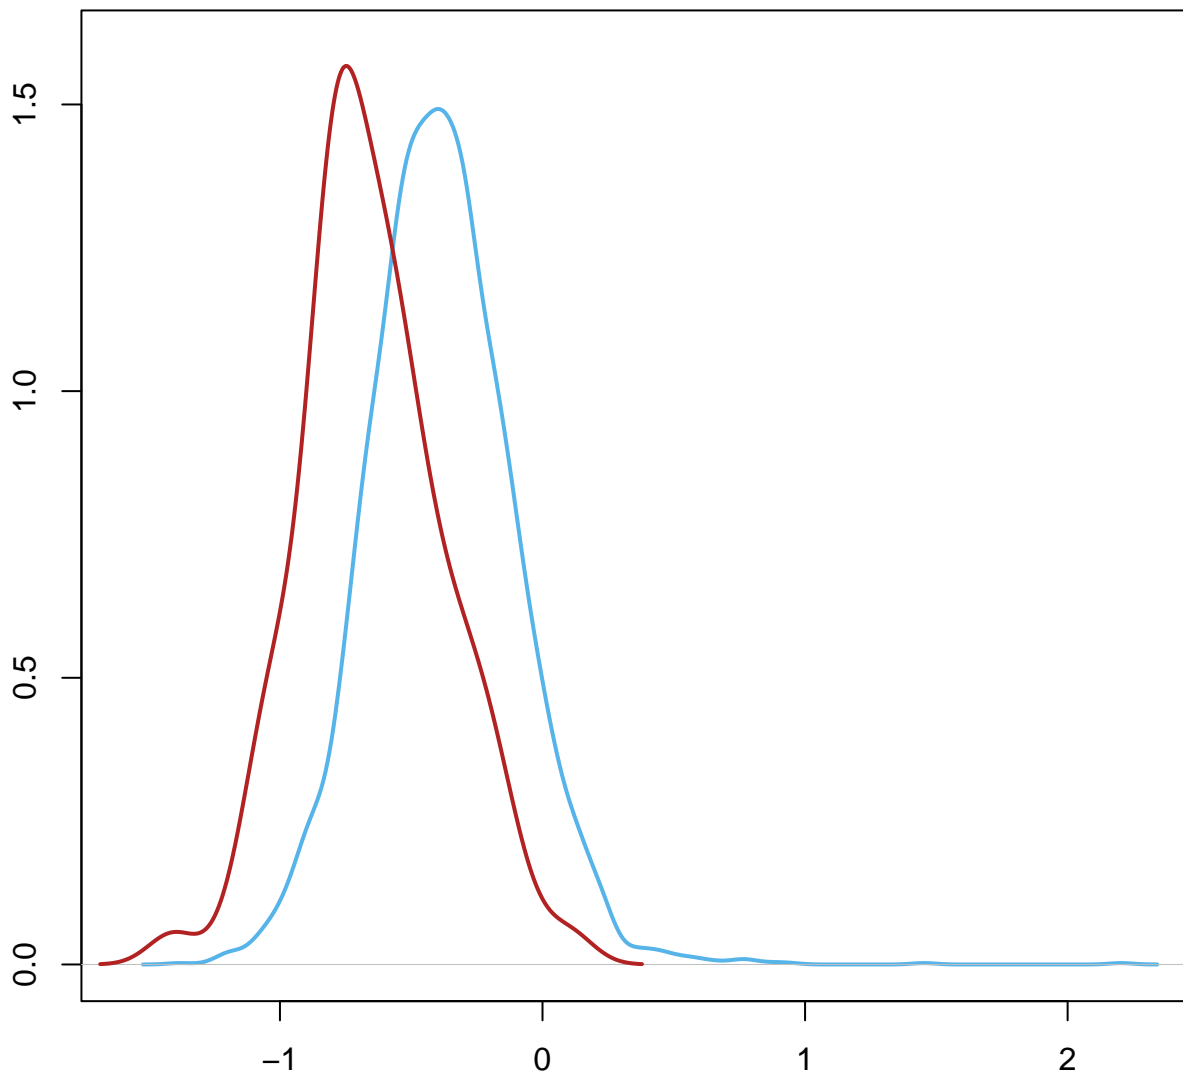

Supplement: Supporting_Figure_1.zip [file Supporting_Figure_1.zip]

In\_Na

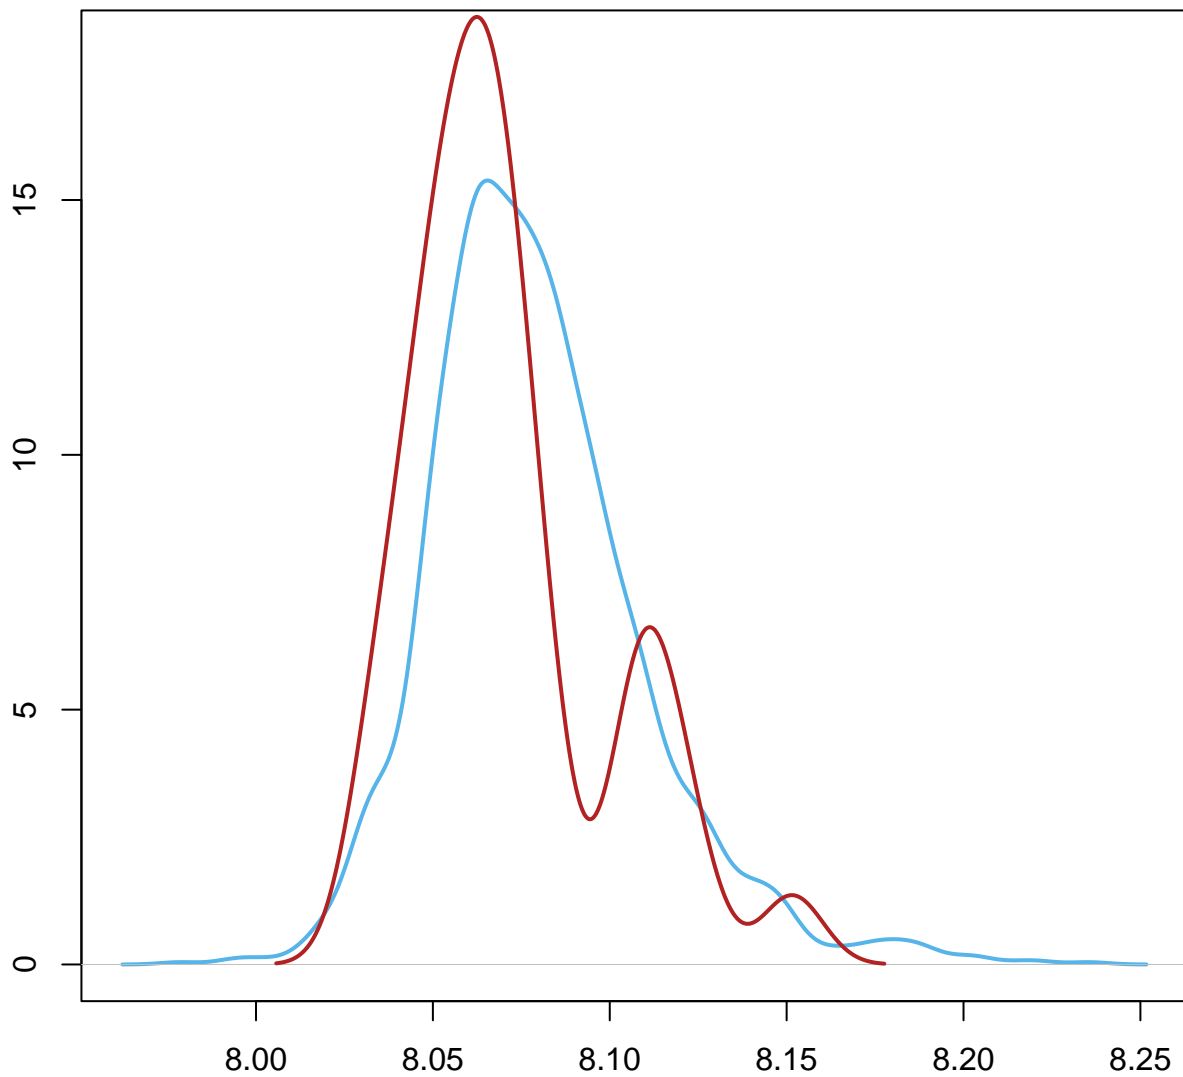

ln\_Mg

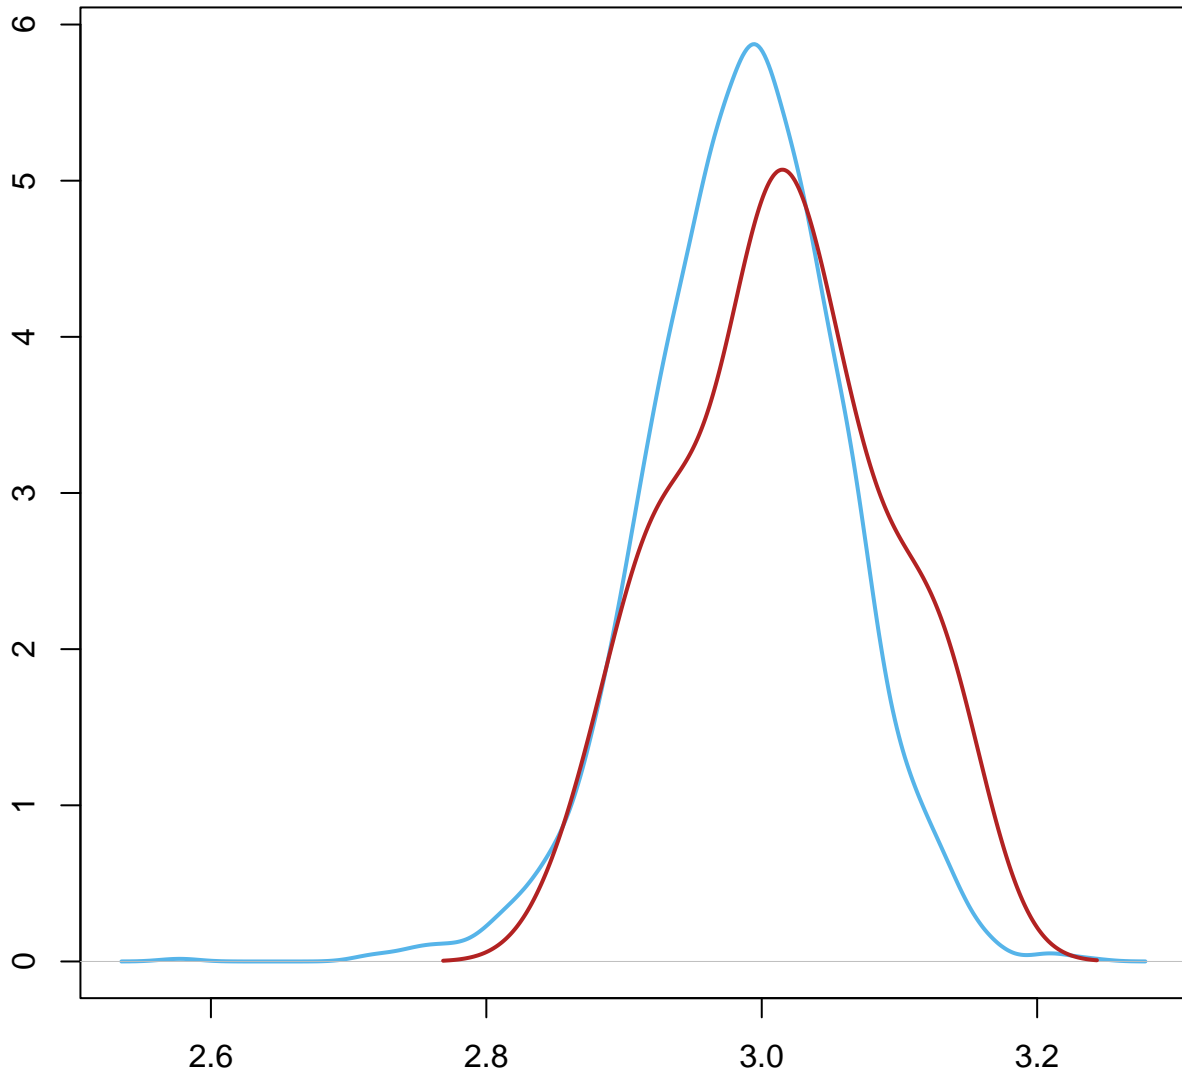

ln\_P

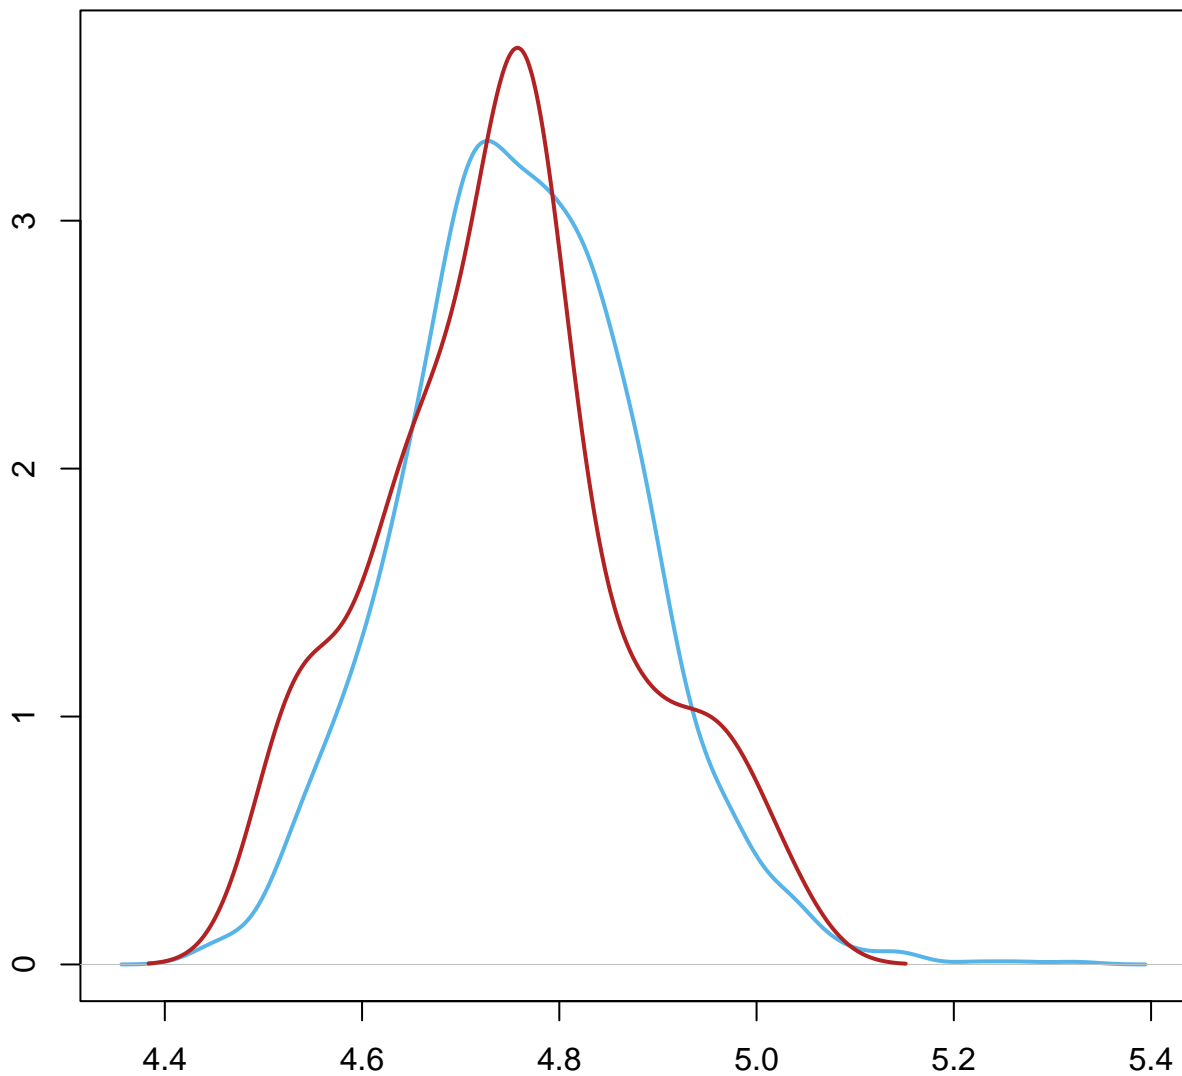

ln\_S

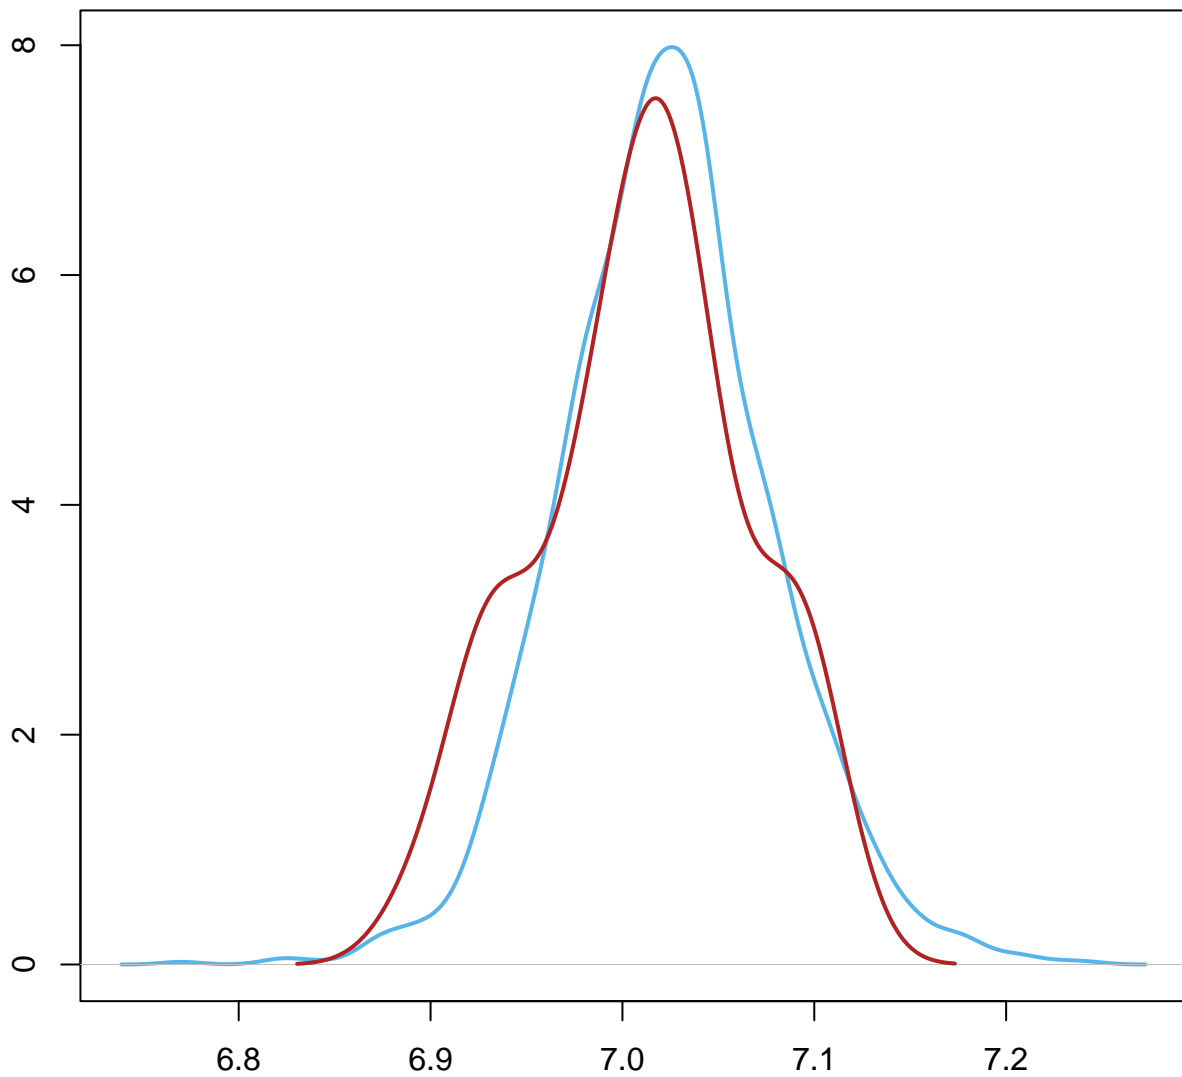

ln\_K

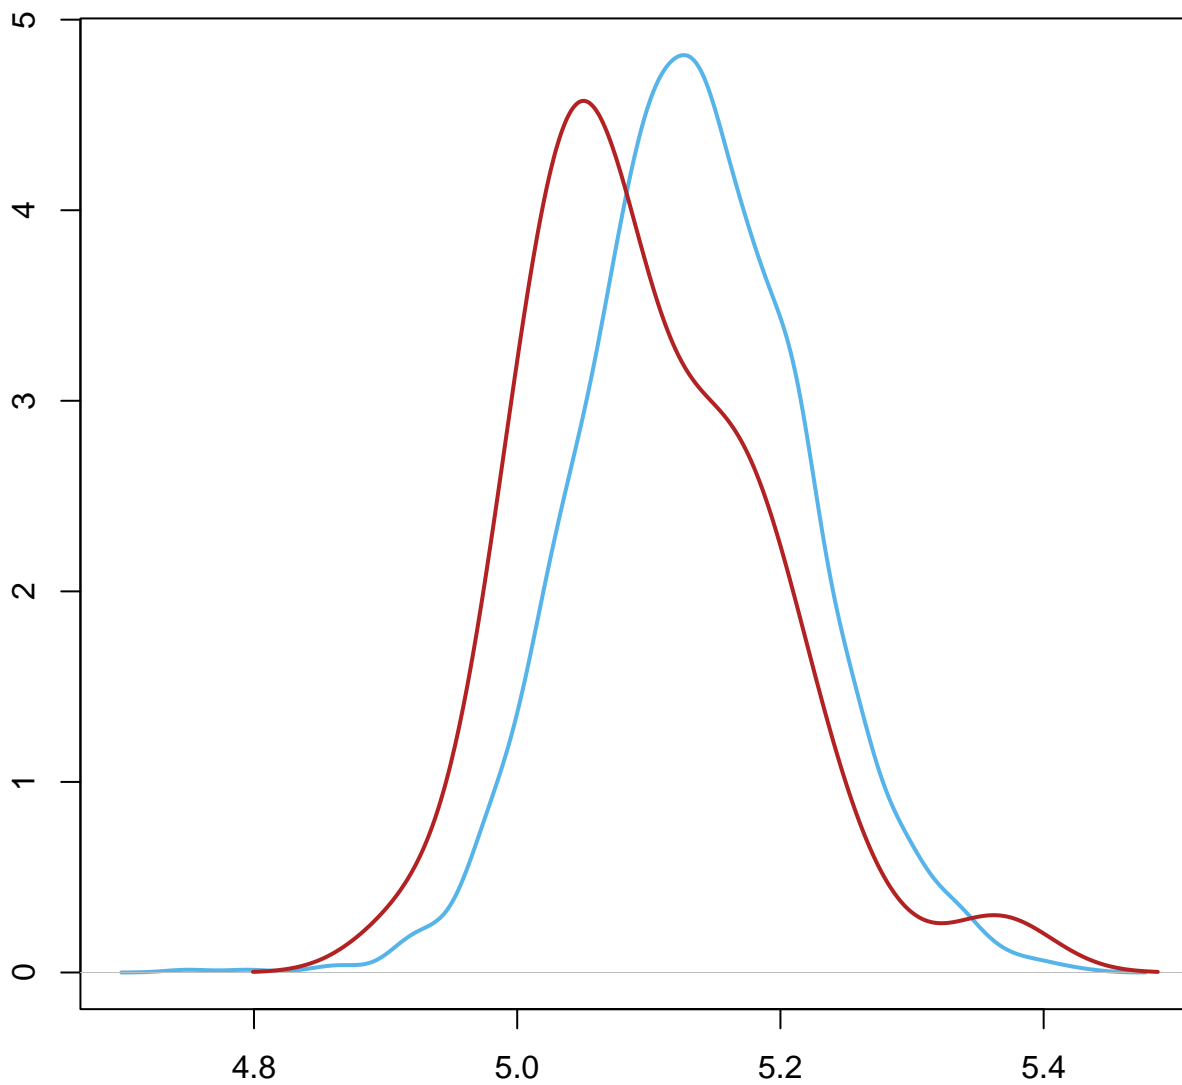

In\_Ca

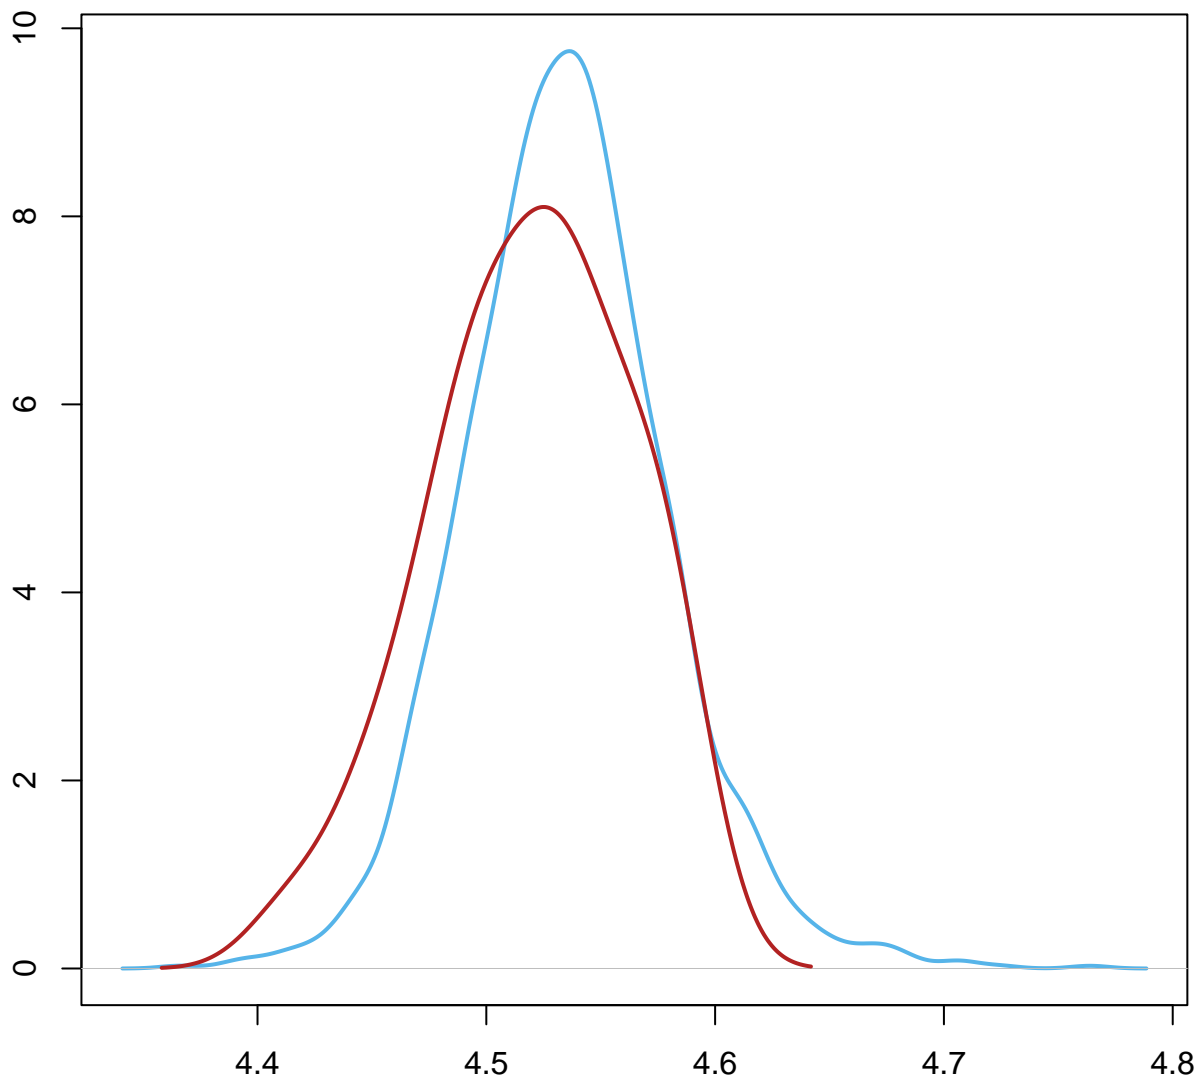

In\_Fe

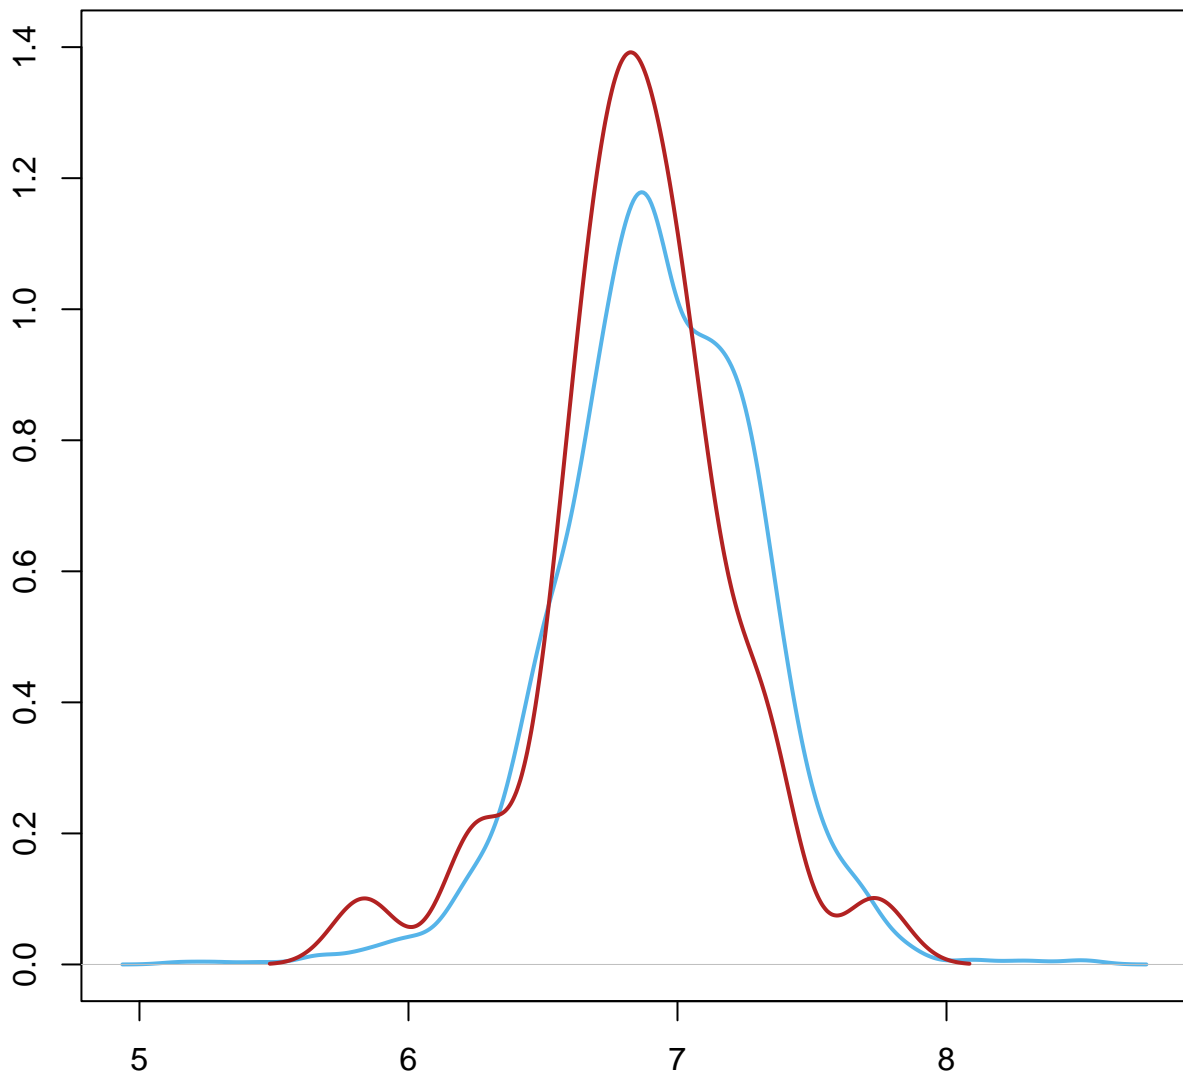

In\_Co

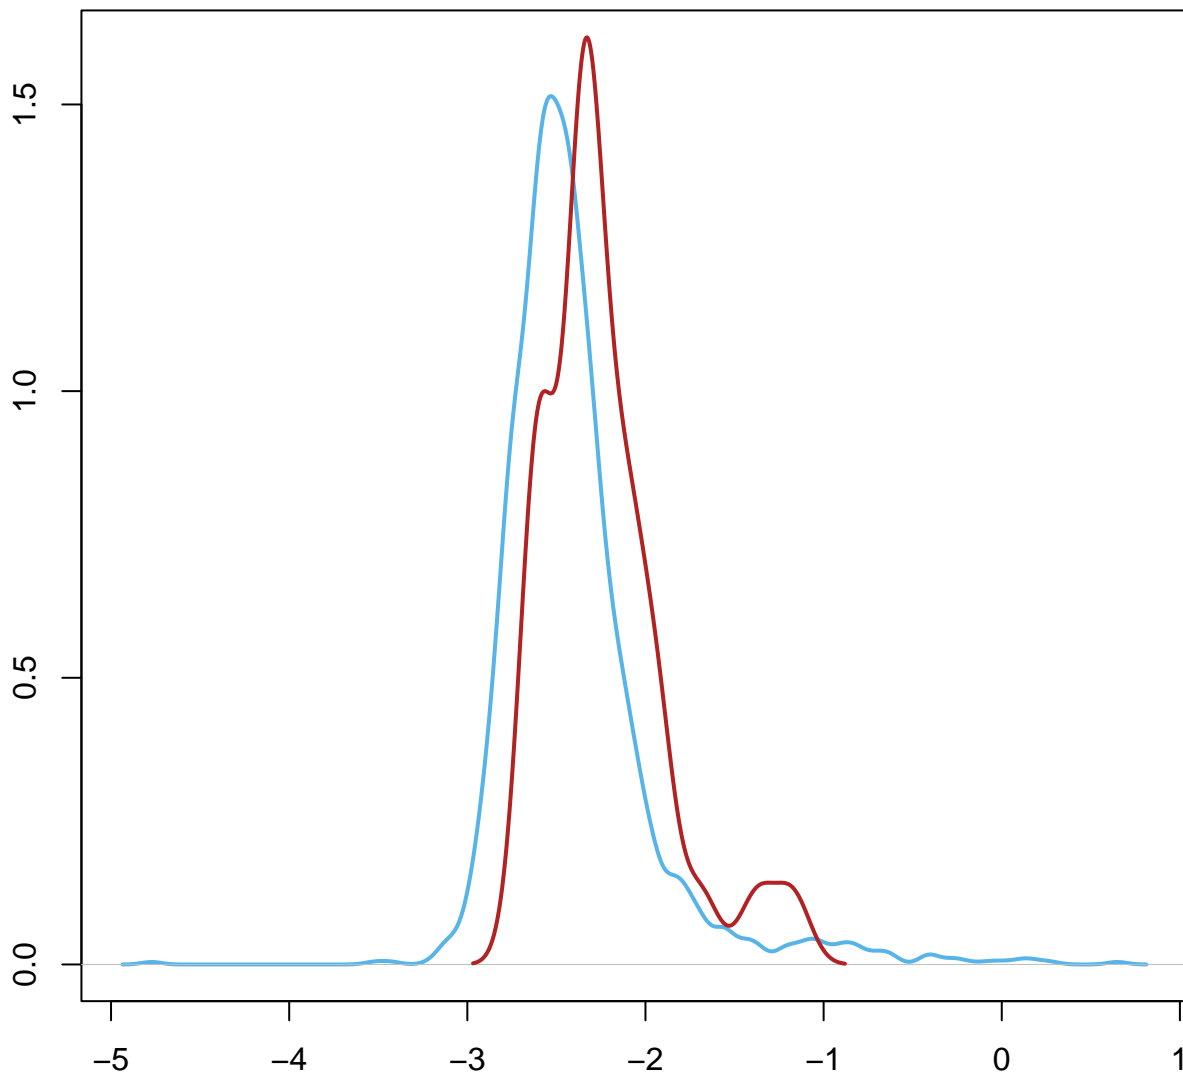



In\_Cu

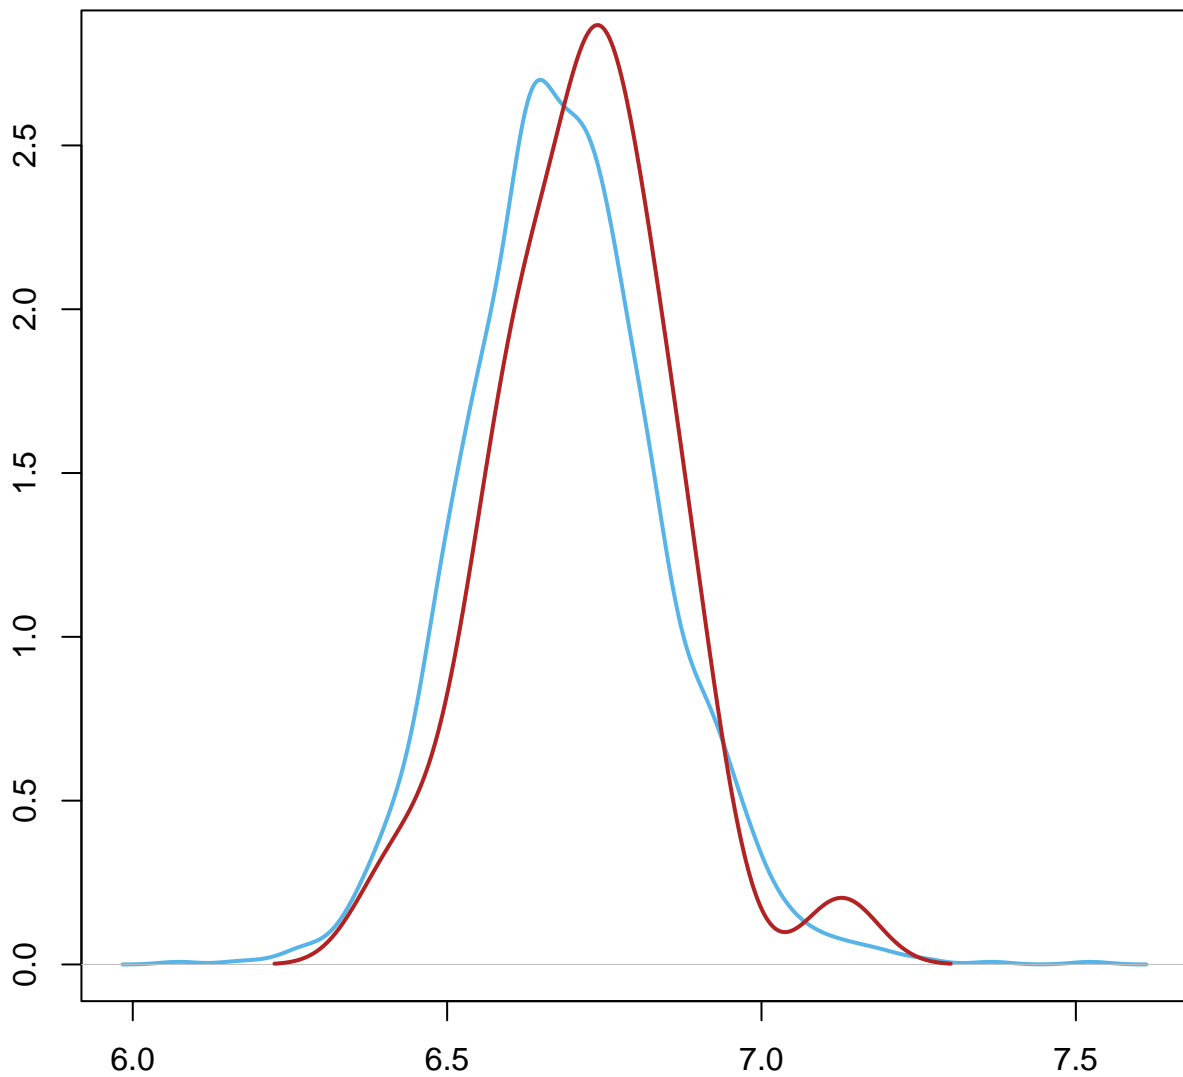

ln\_Zn

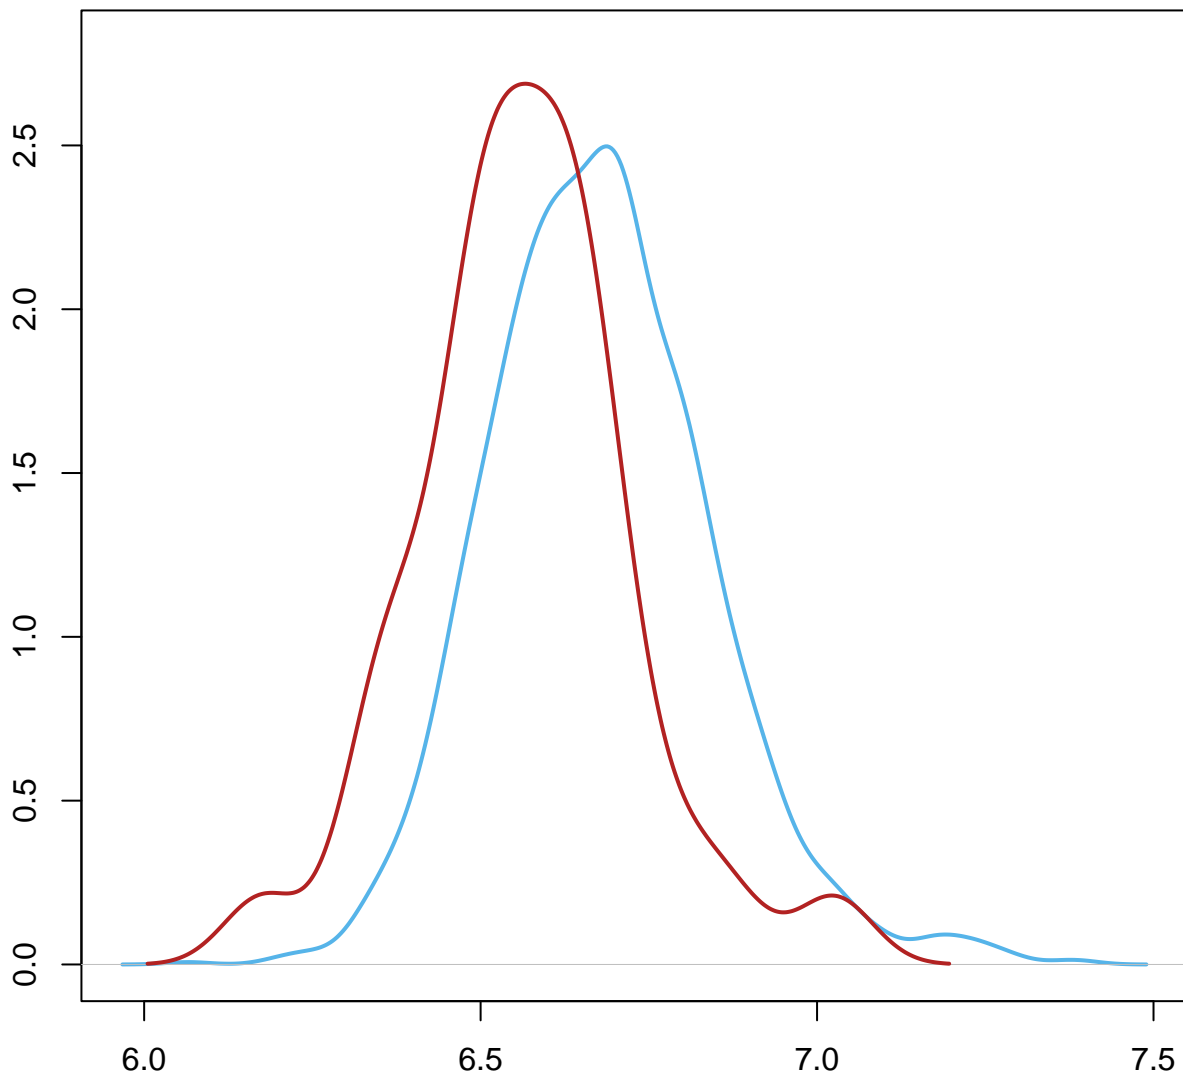

In\_As

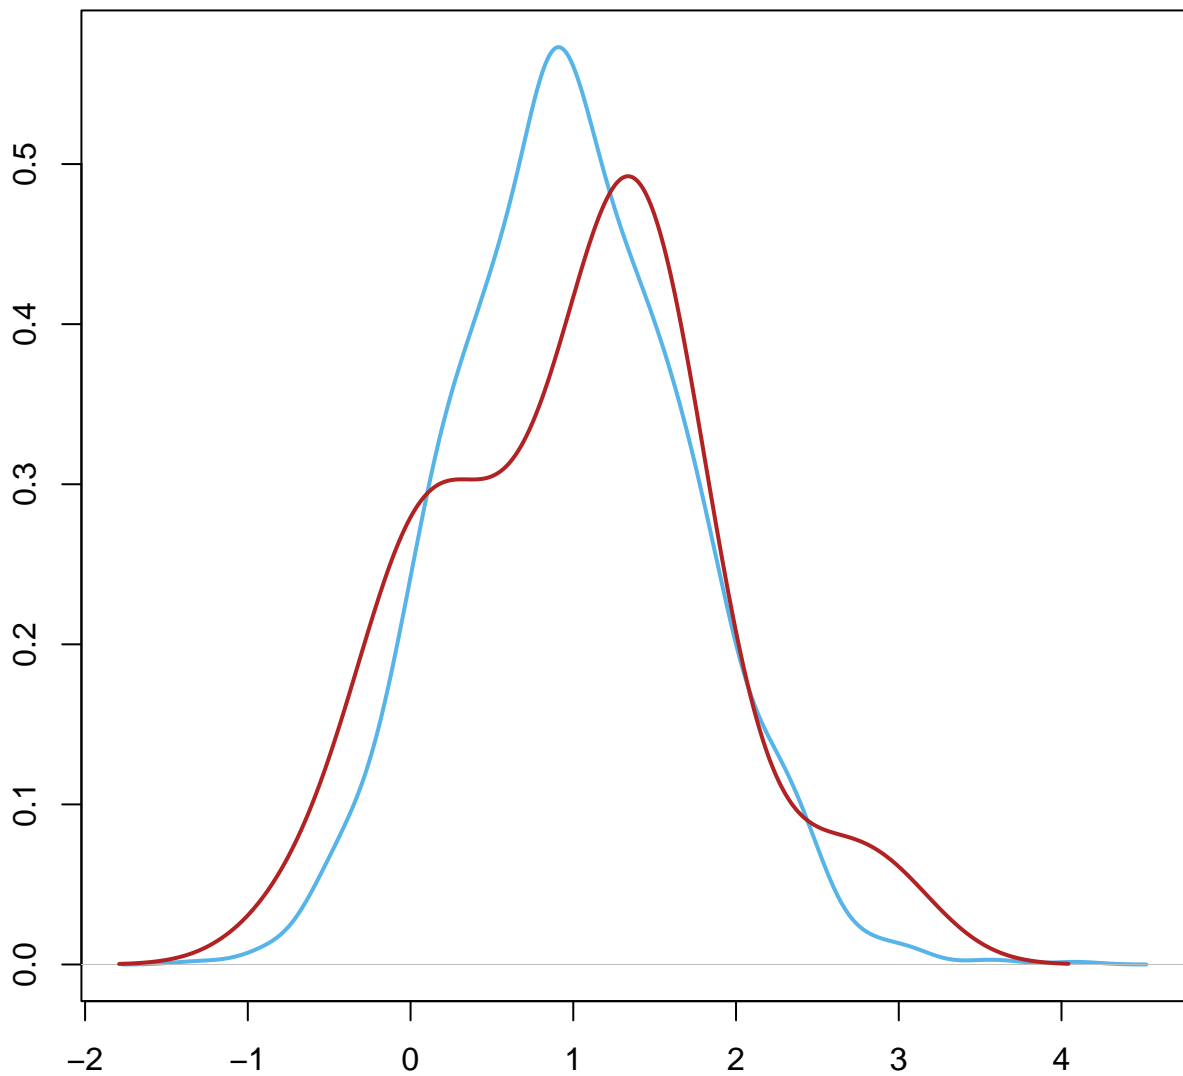

In\_Se

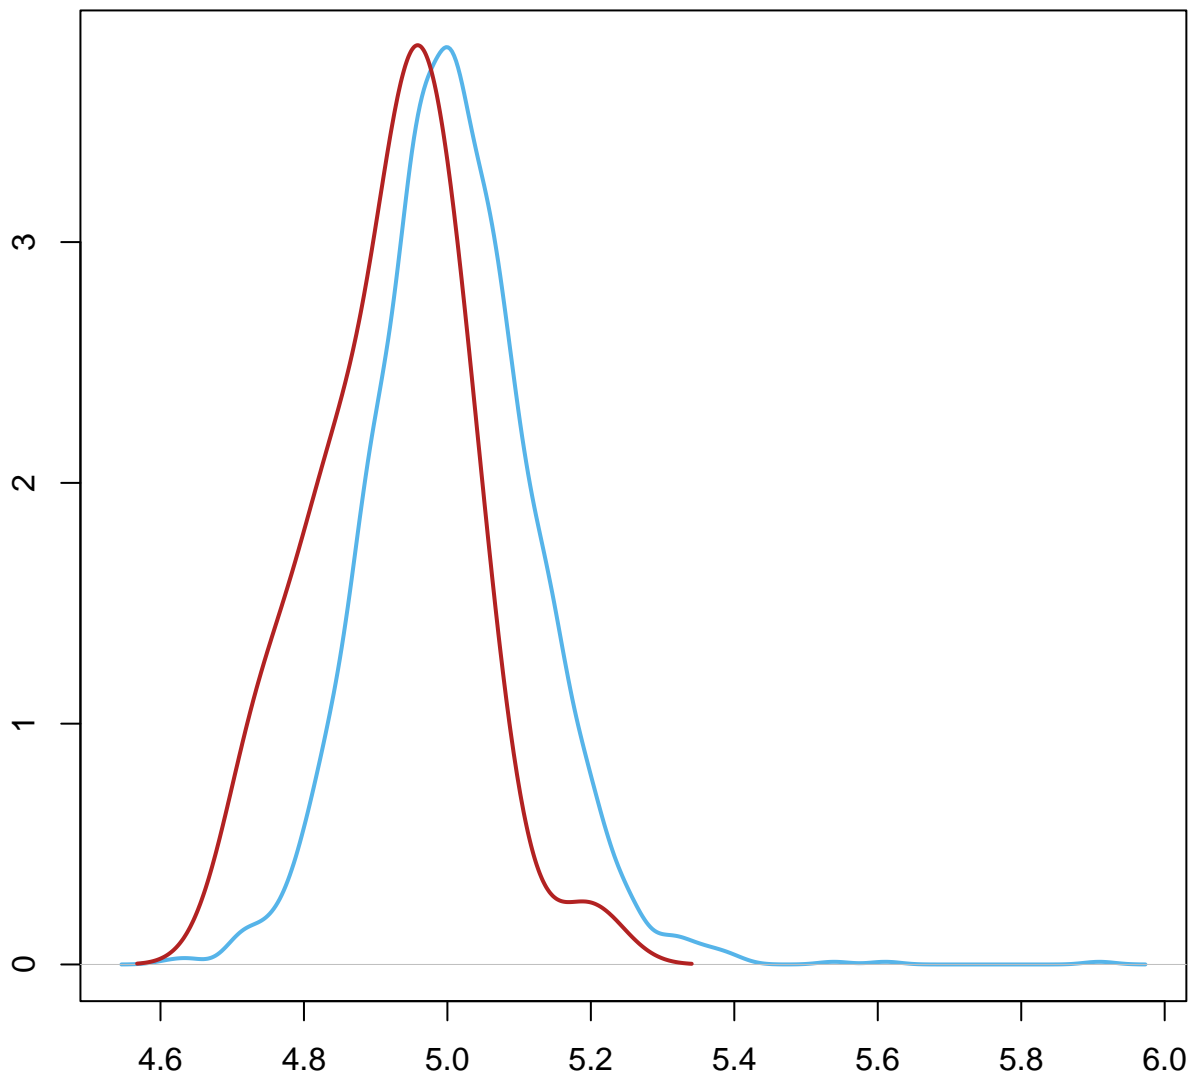

**ln\_Rb**

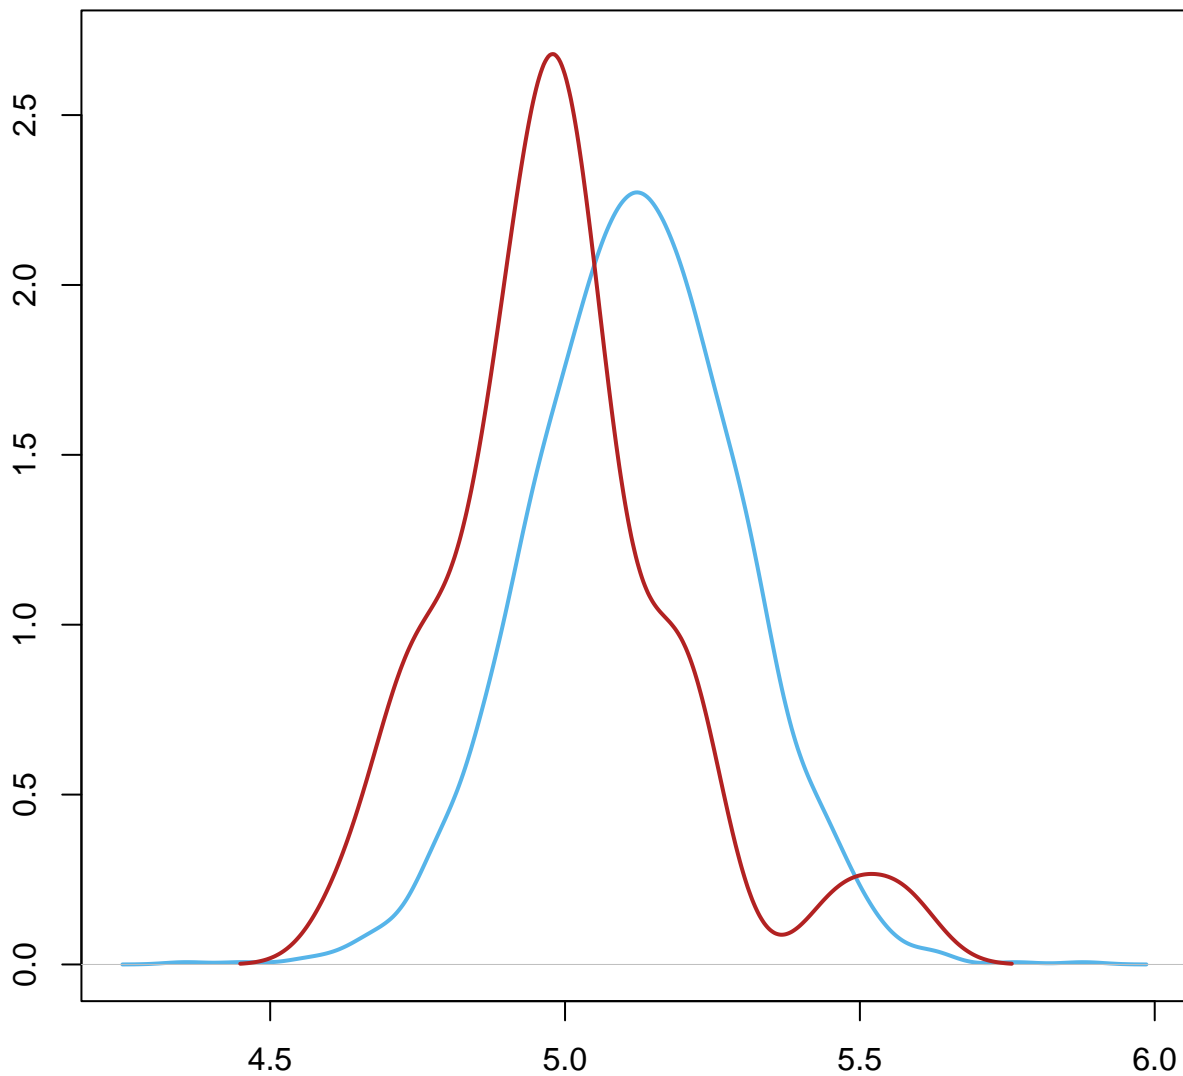

In\_Sr

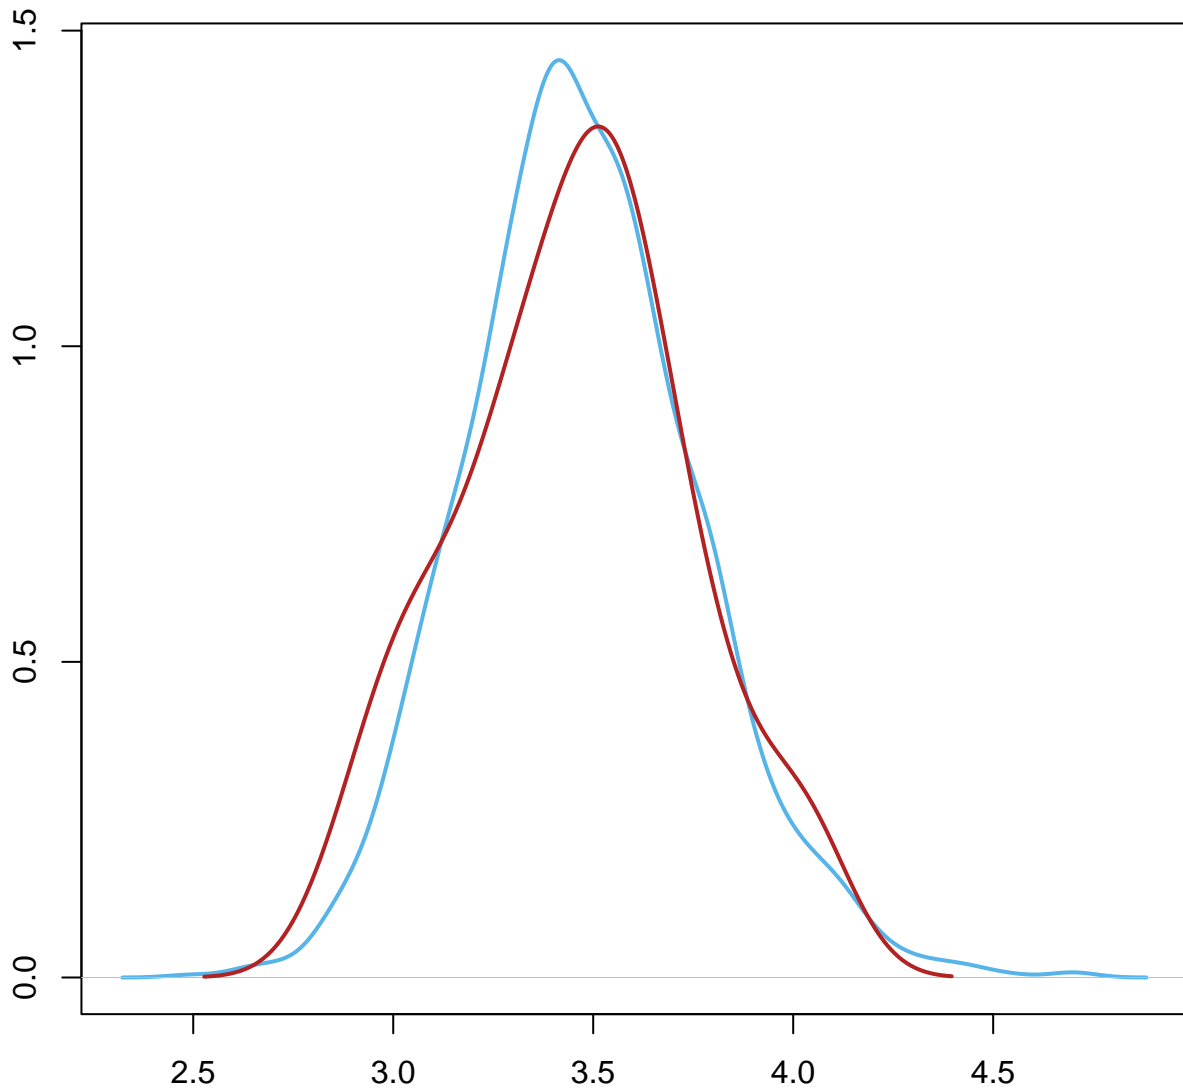

In\_Mo

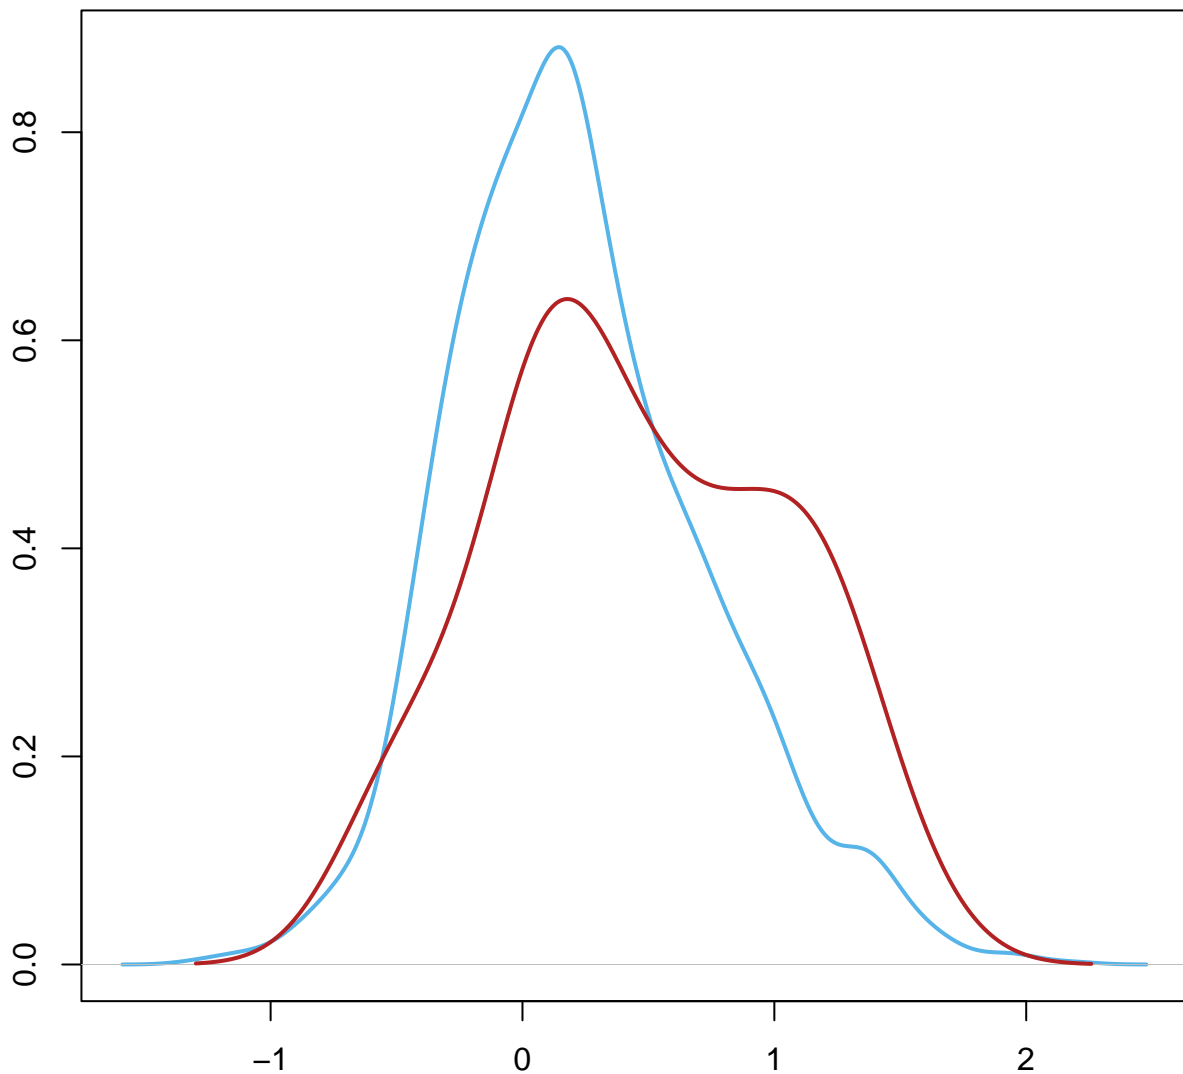

In\_Ag

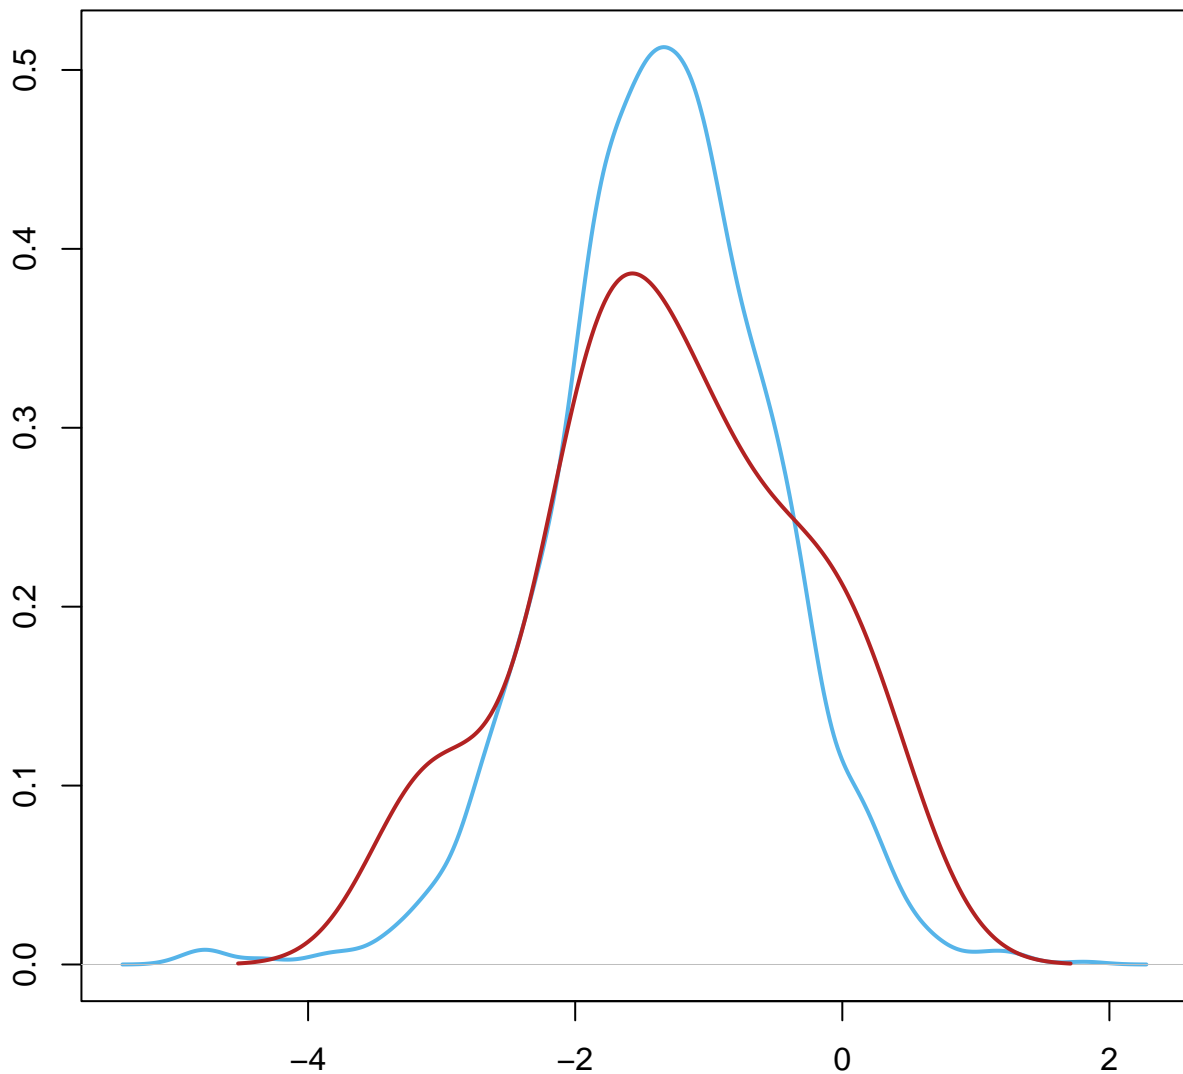



In\_Cs

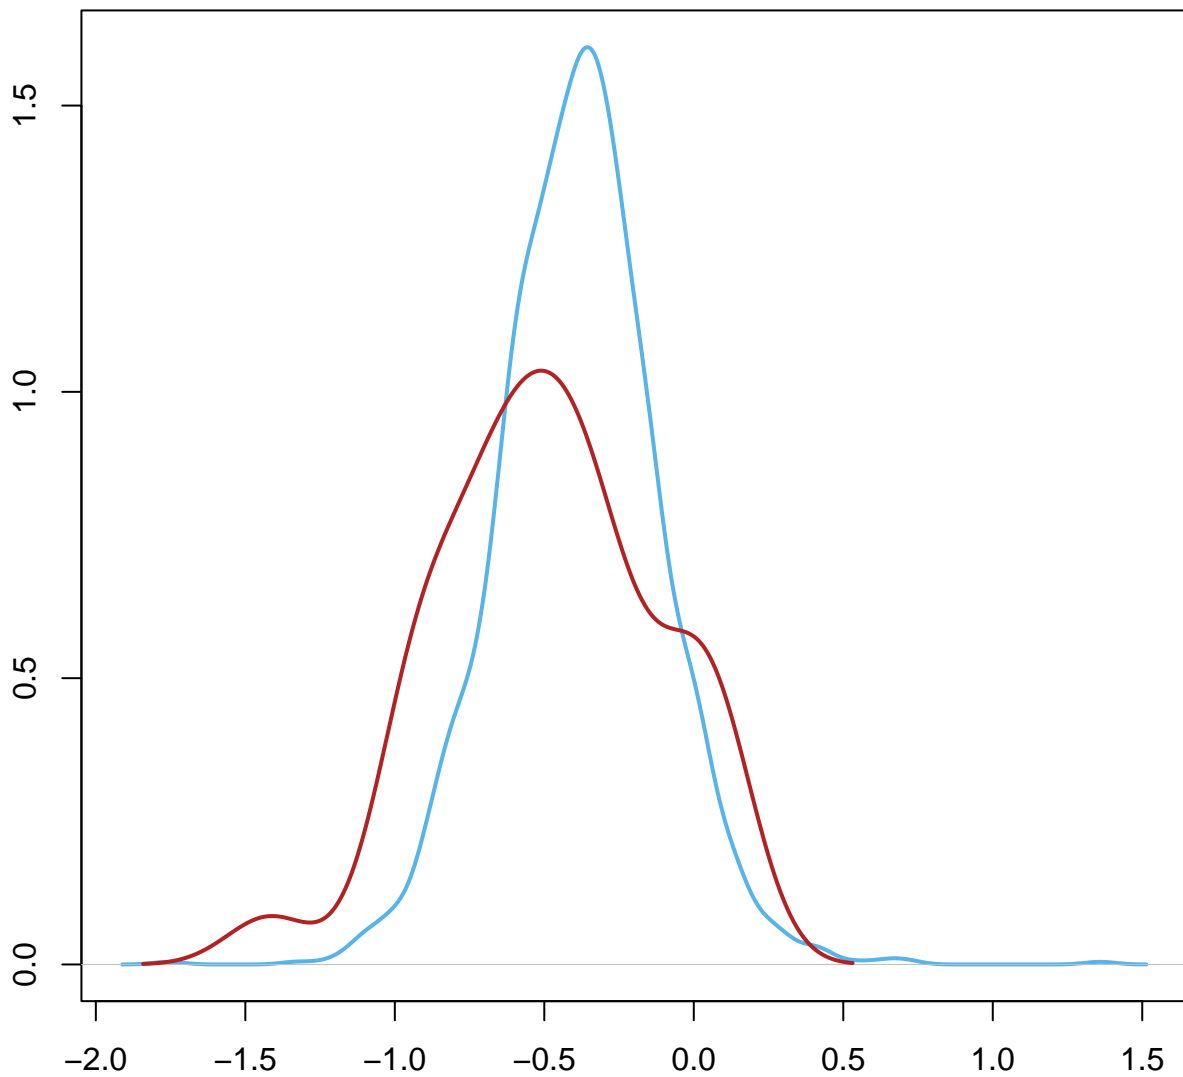

Supplement: Supporting_Figure_1.zip [file Supporting_Figure_1.zip]

In\_Na

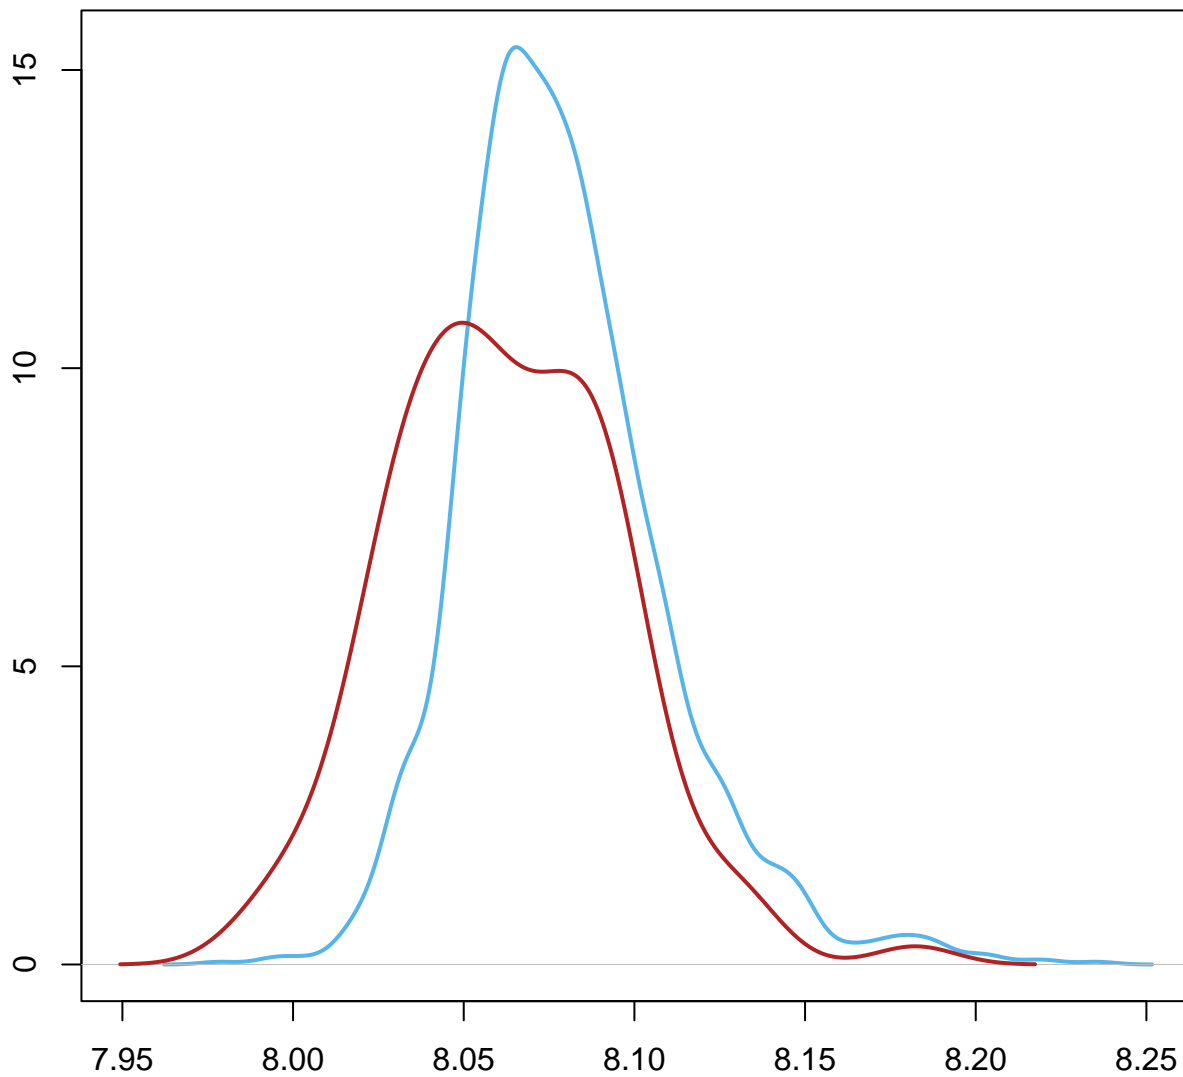

ln\_Mg

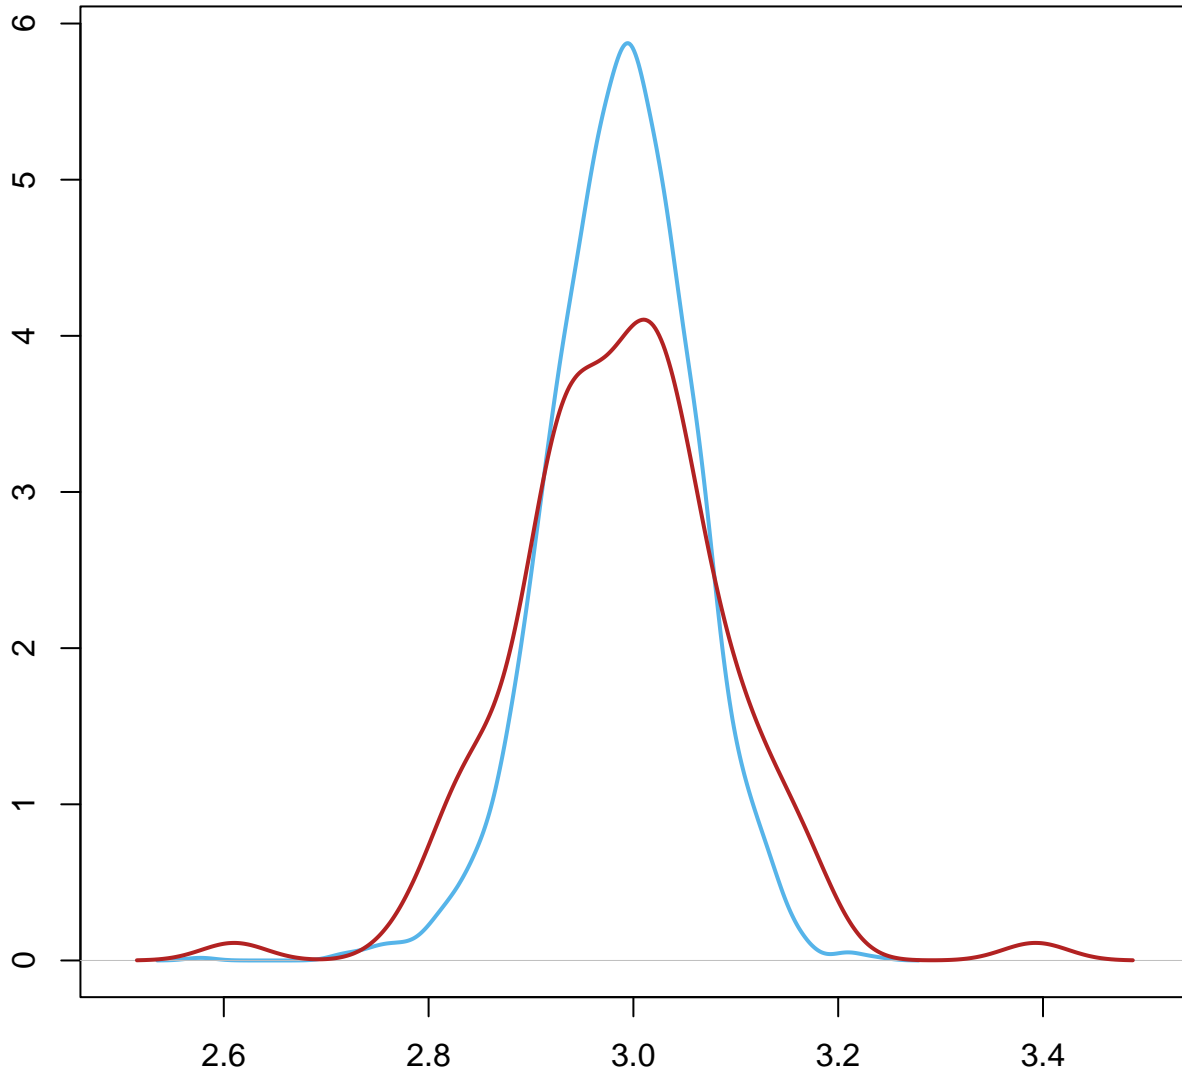

ln\_P

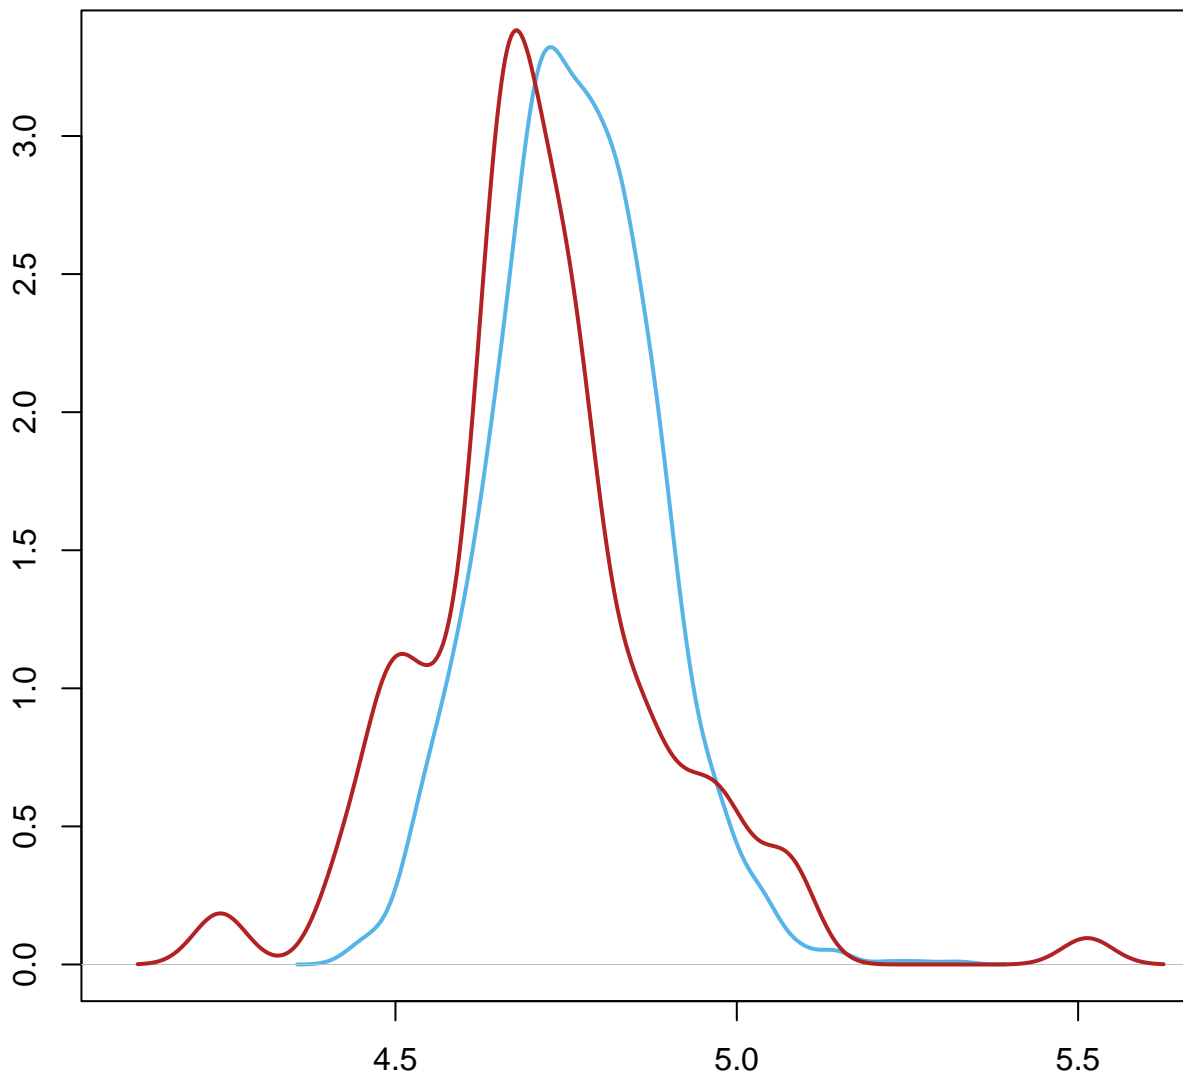

$\ln_S$

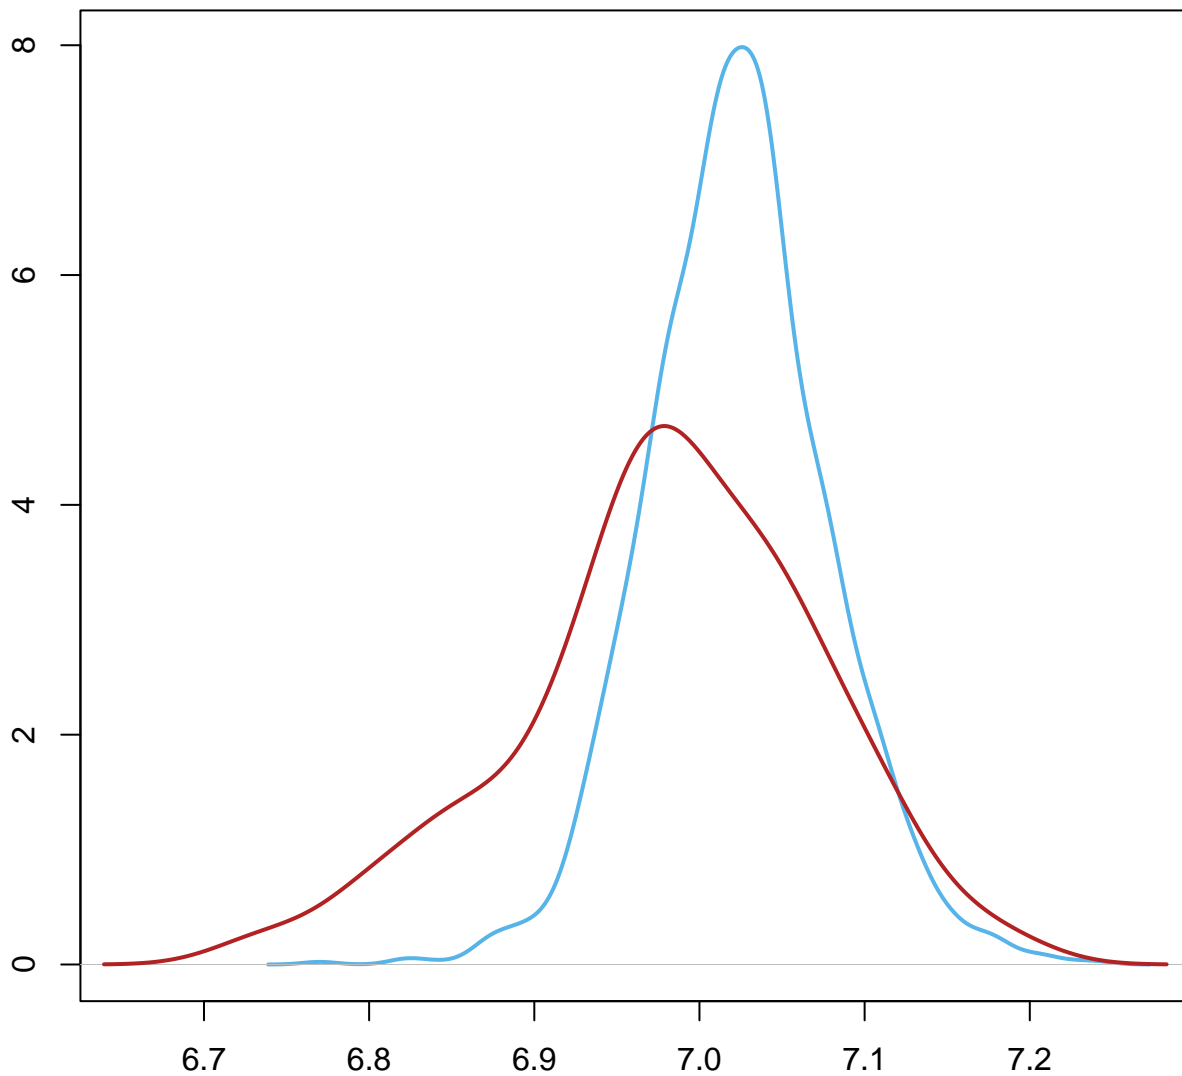

ln\_K

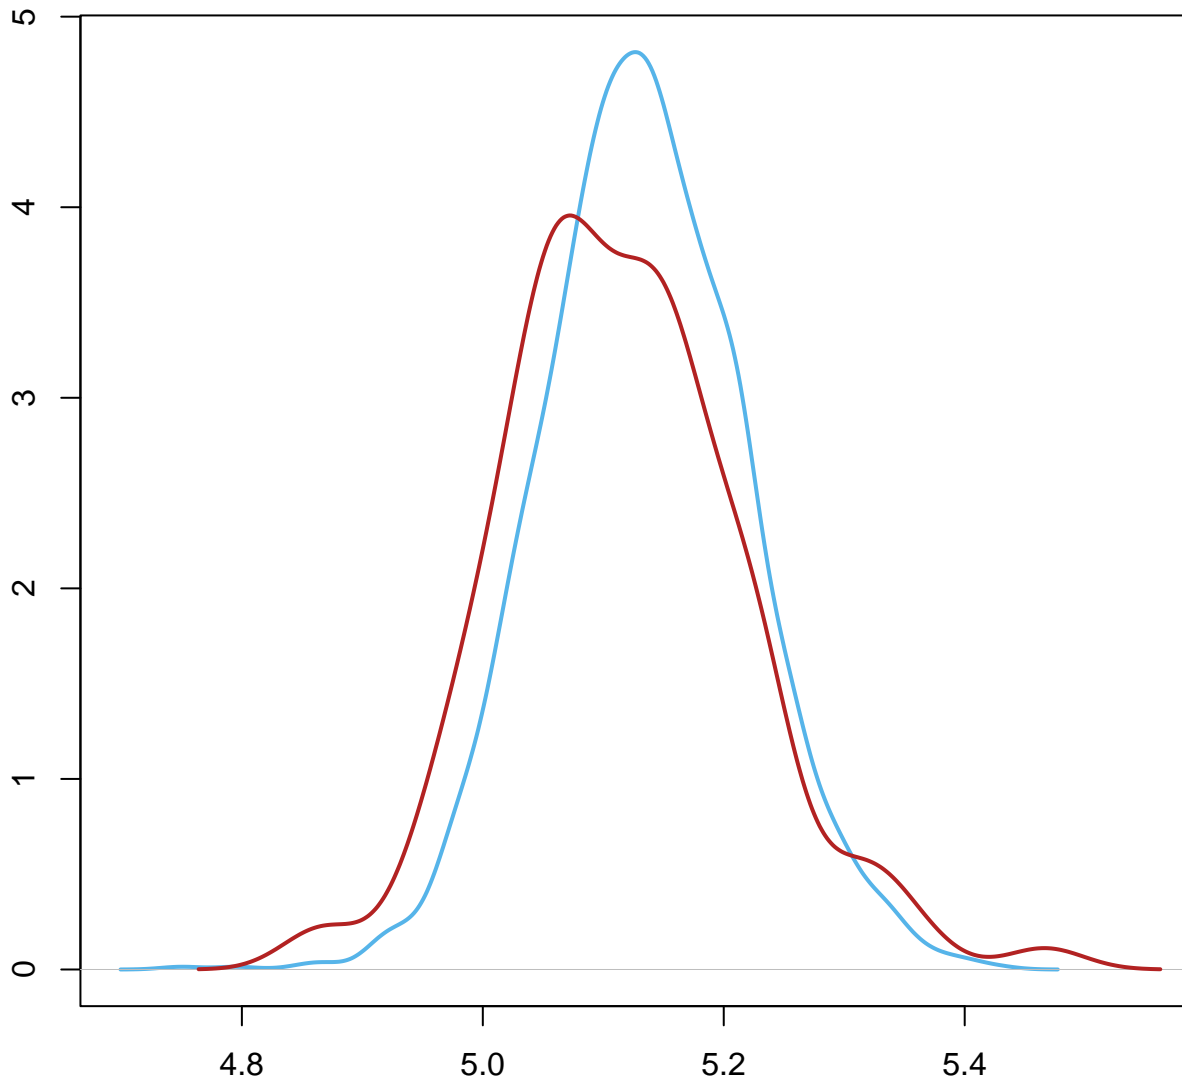

In\_Ca

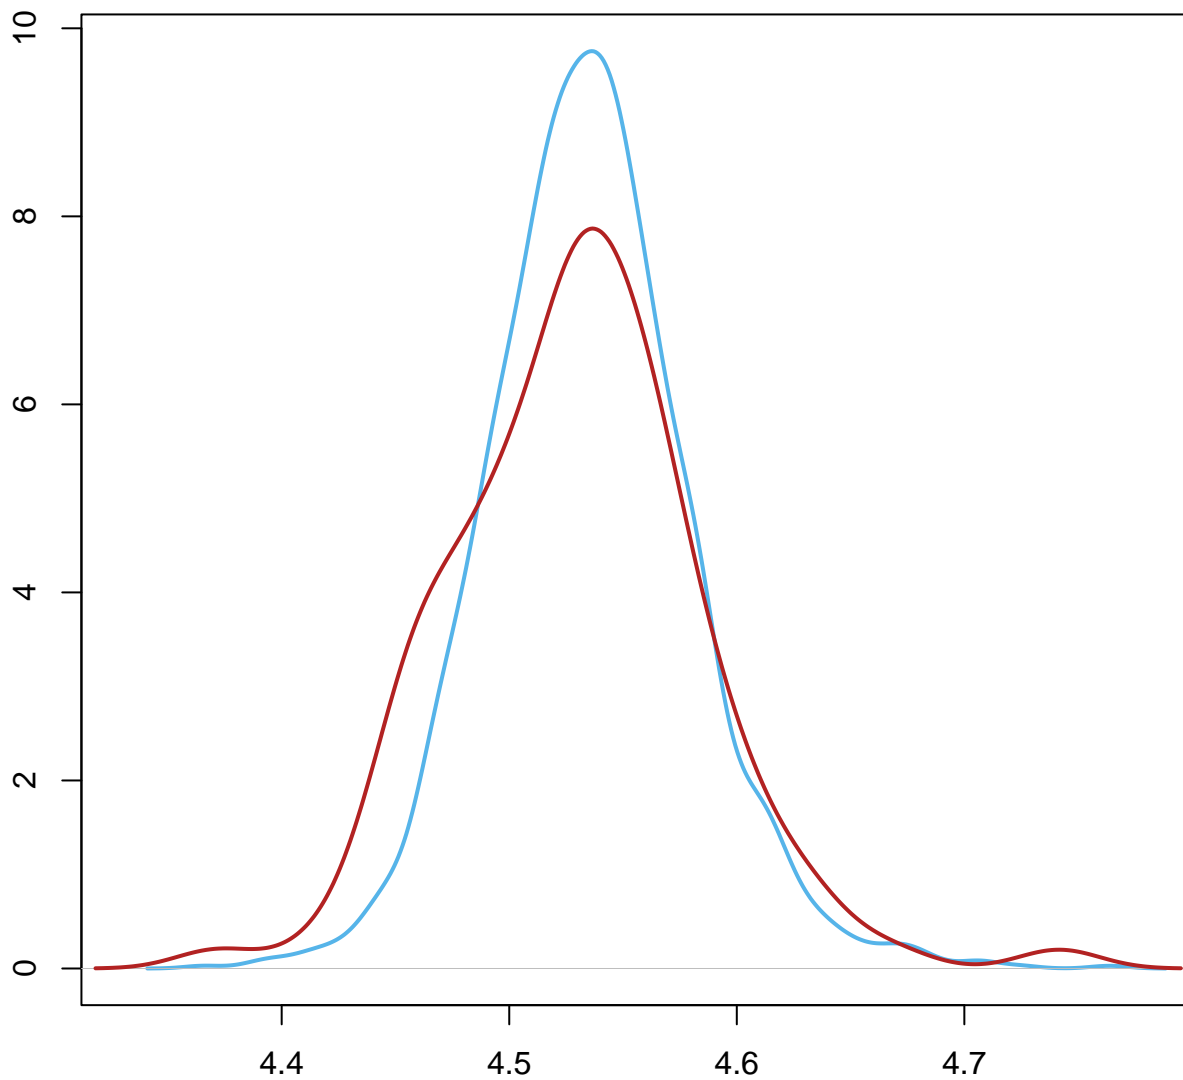

In\_Fe

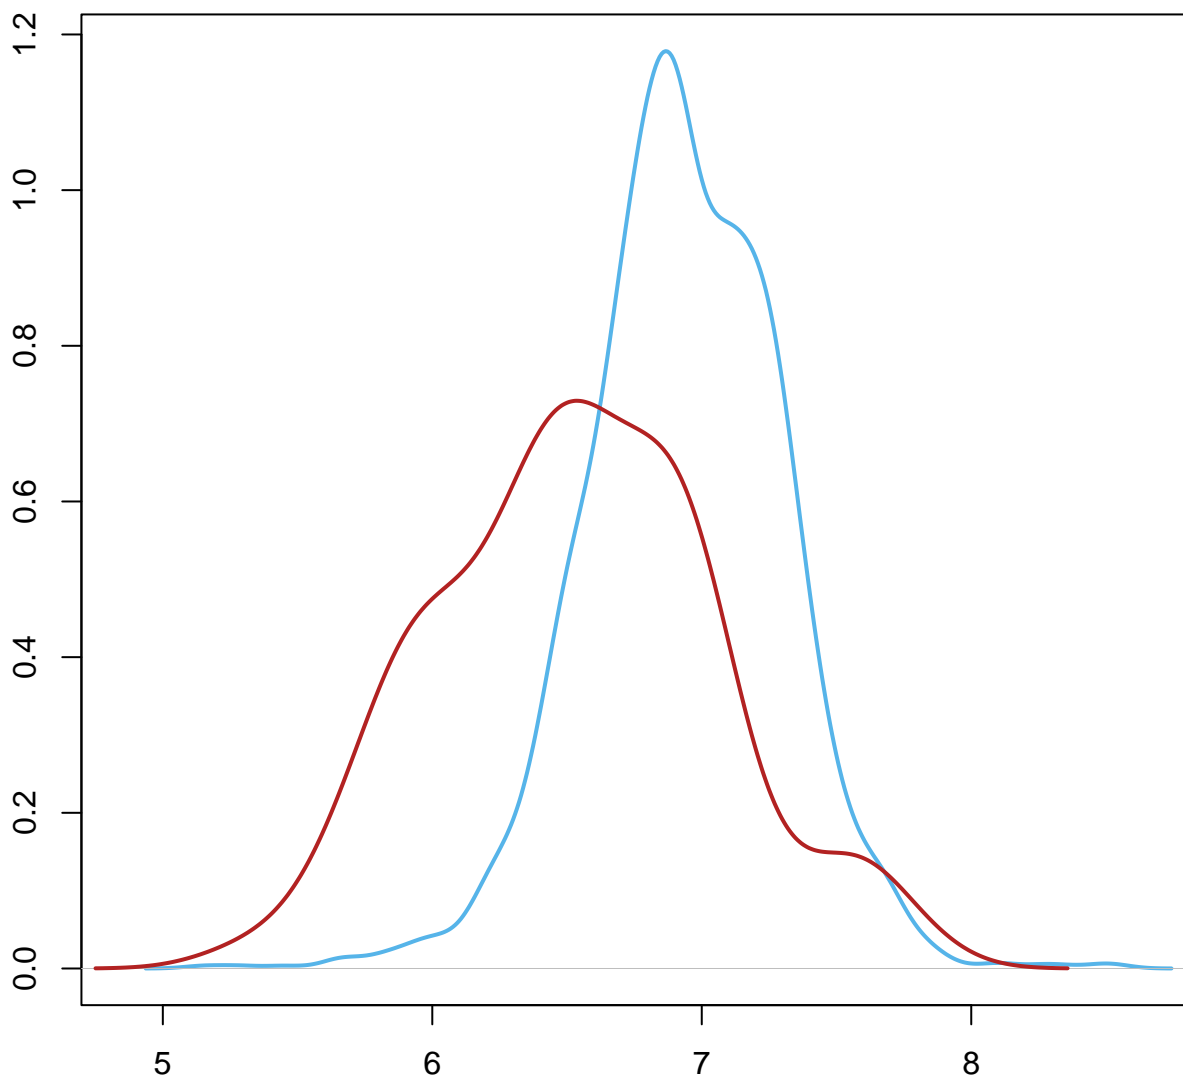

In\_Co

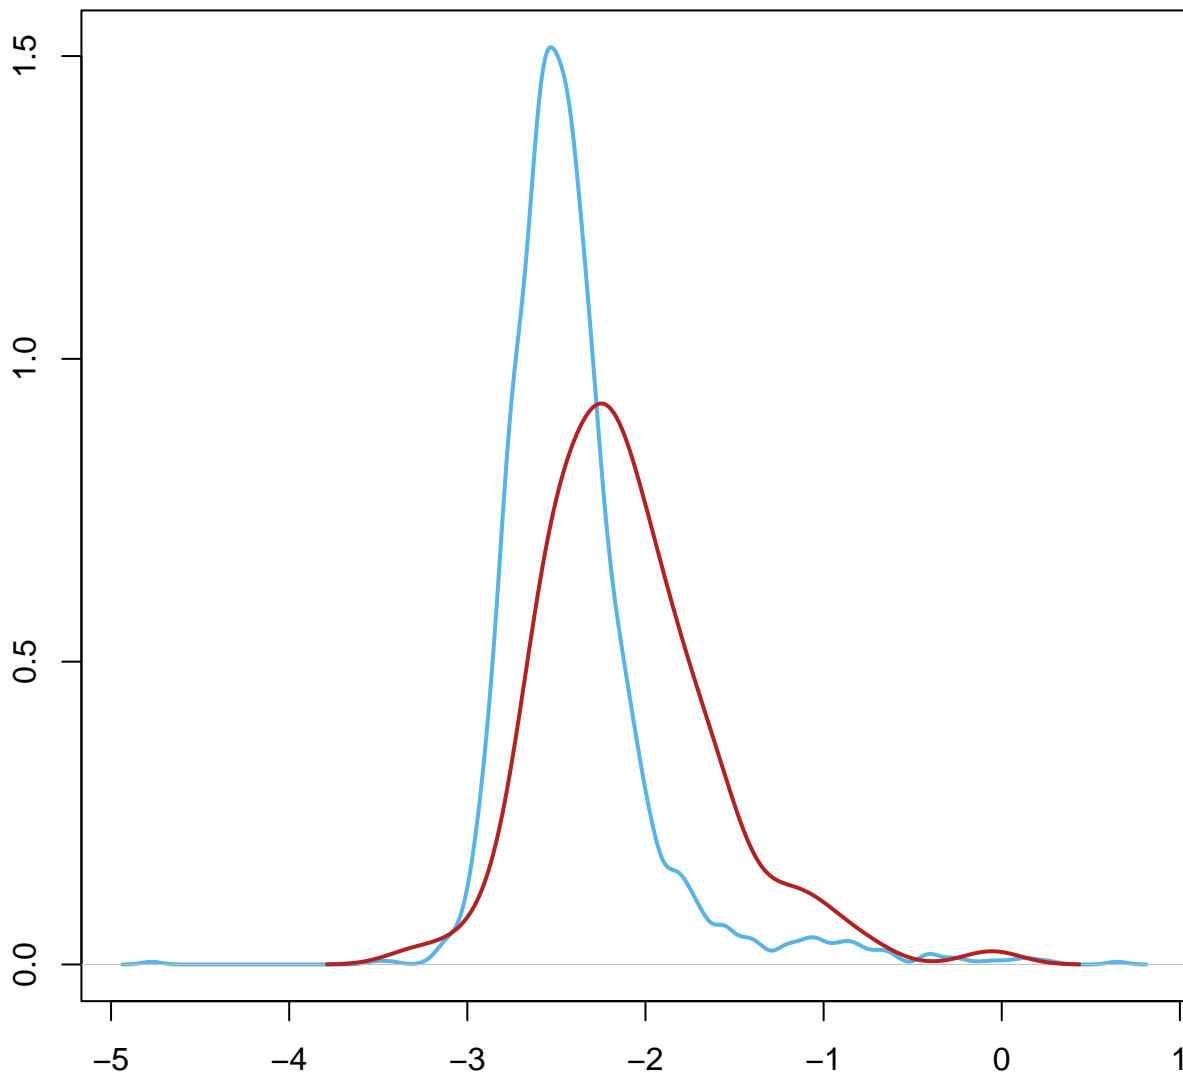



In\_Cu

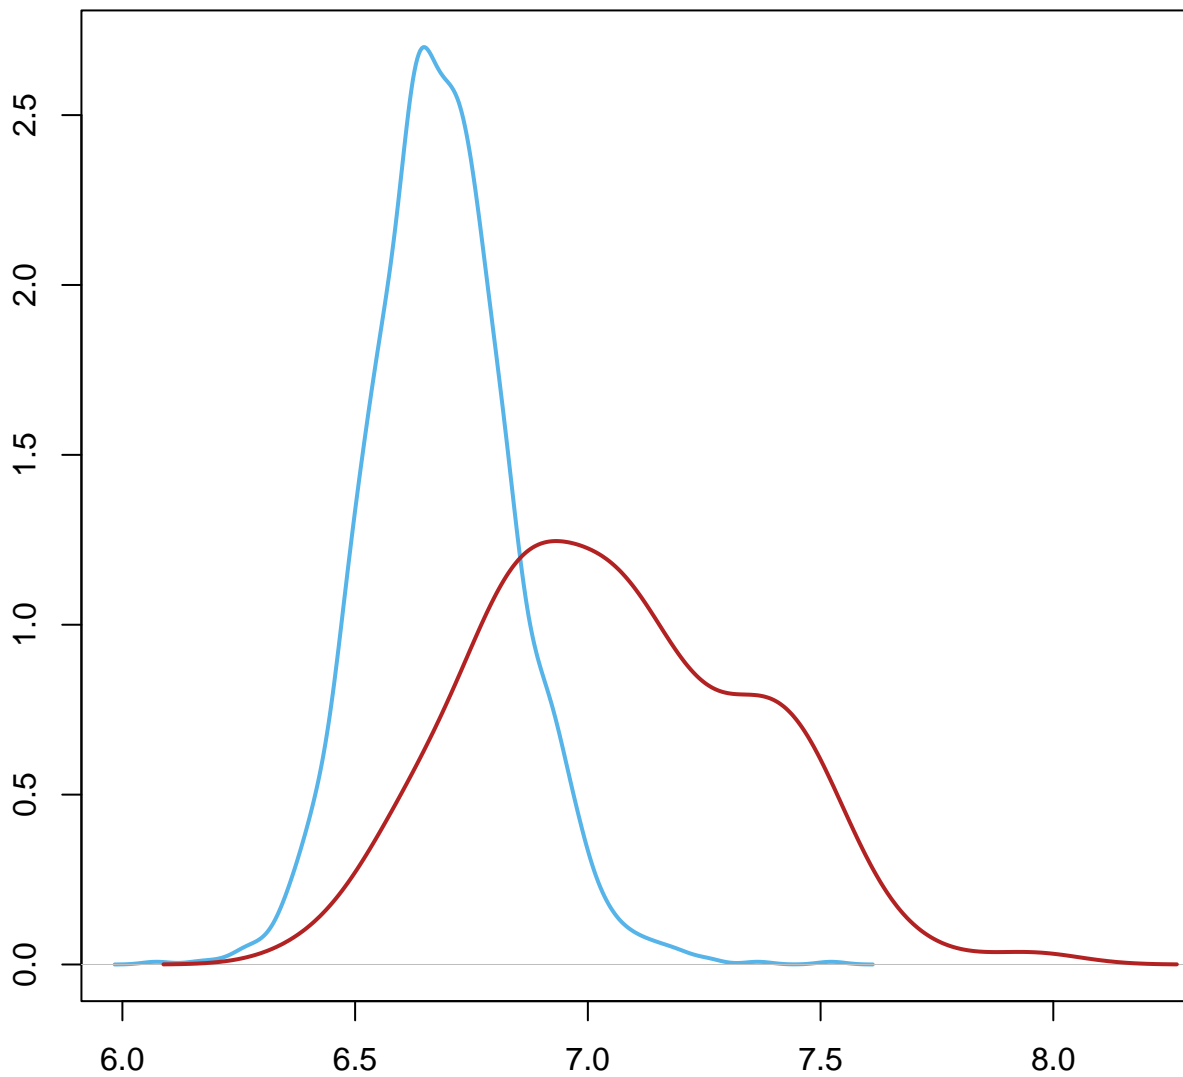

ln\_Zn

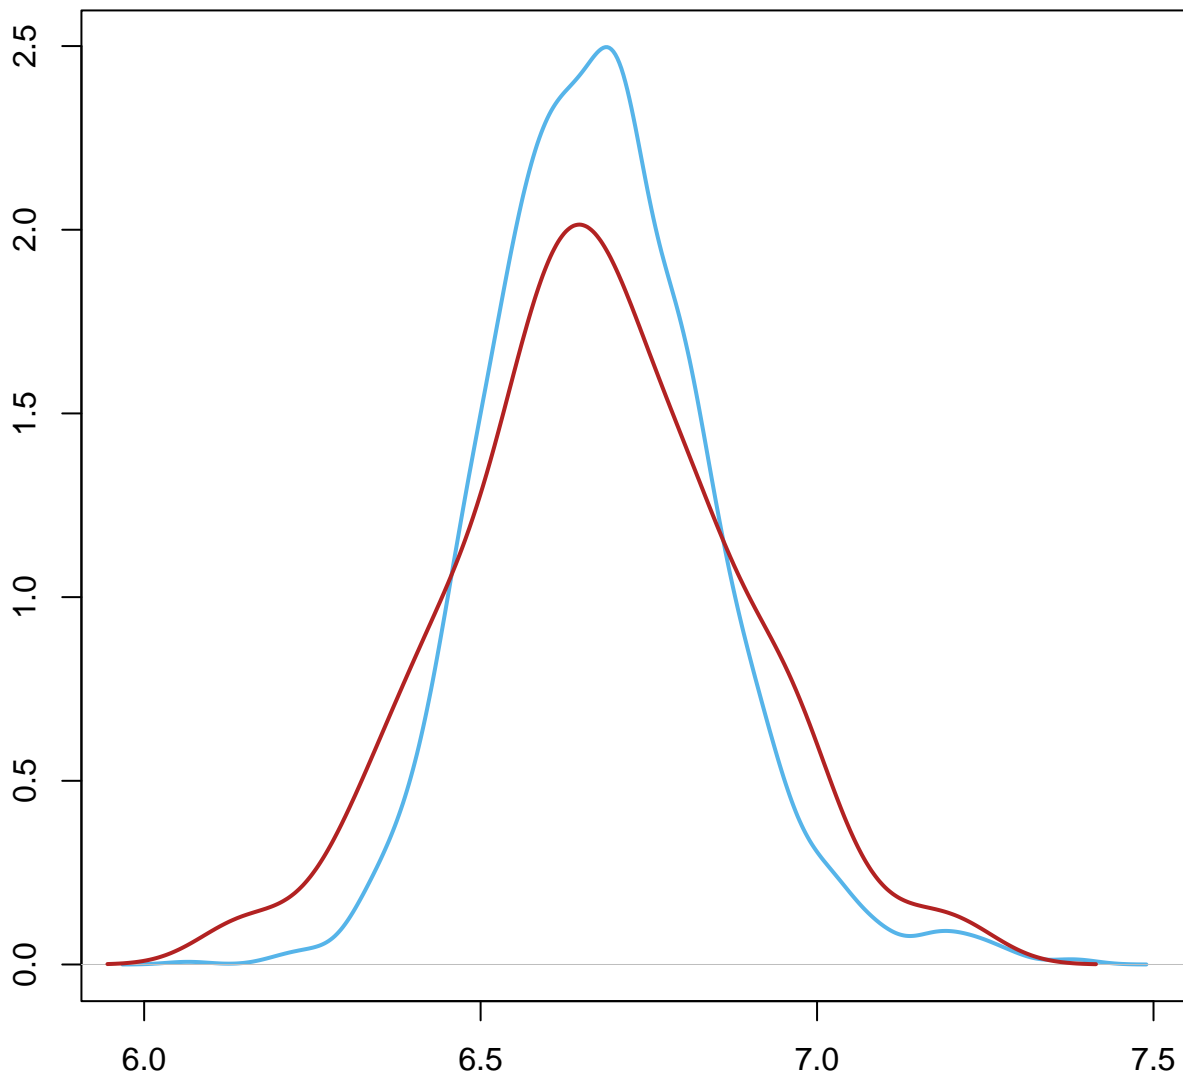

ln\_As

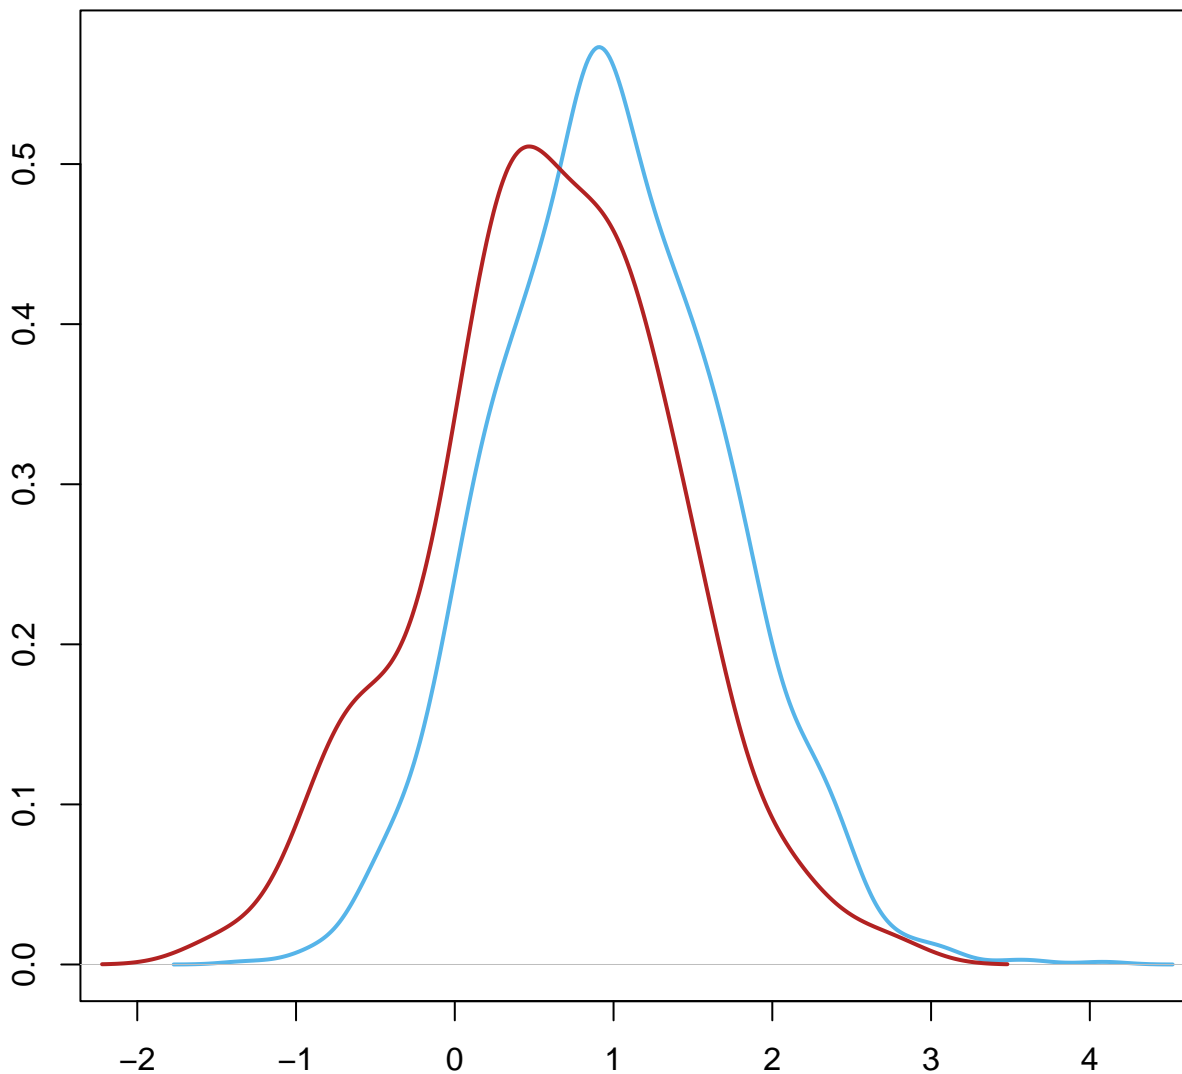

In\_Se

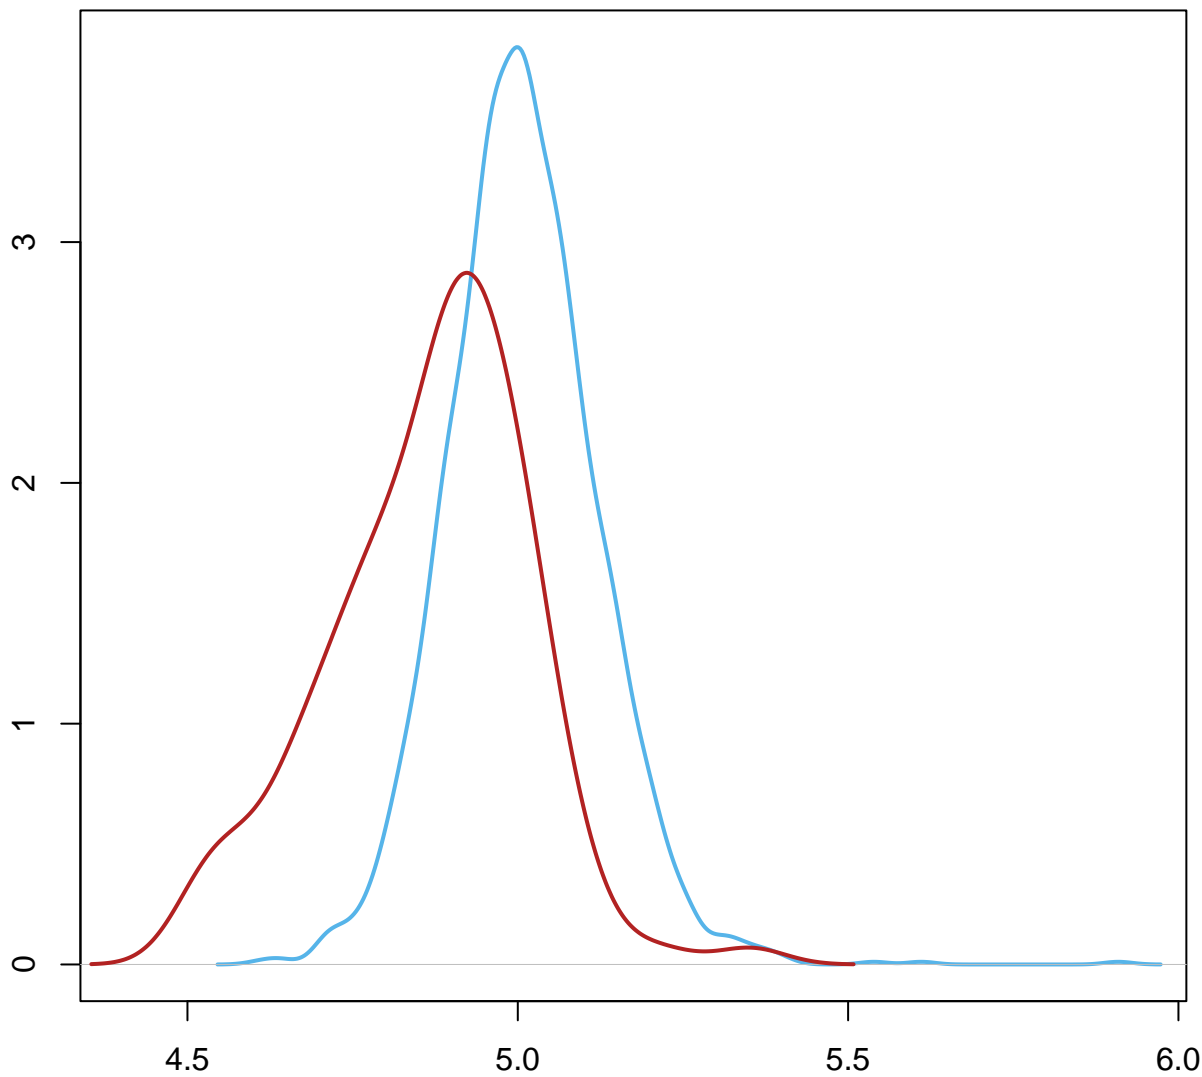

In\_Rb

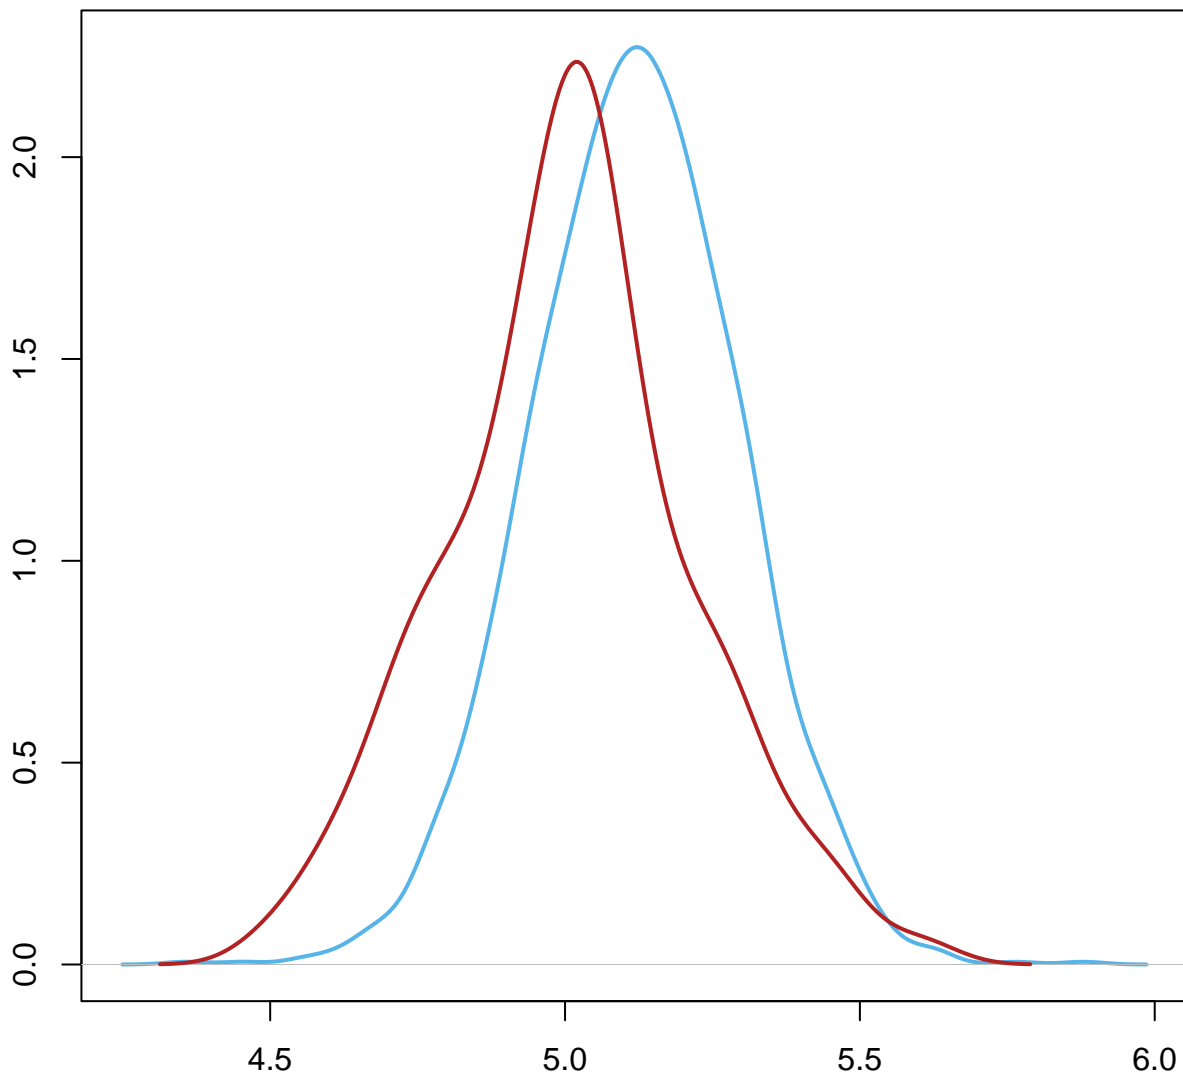

In\_Sr

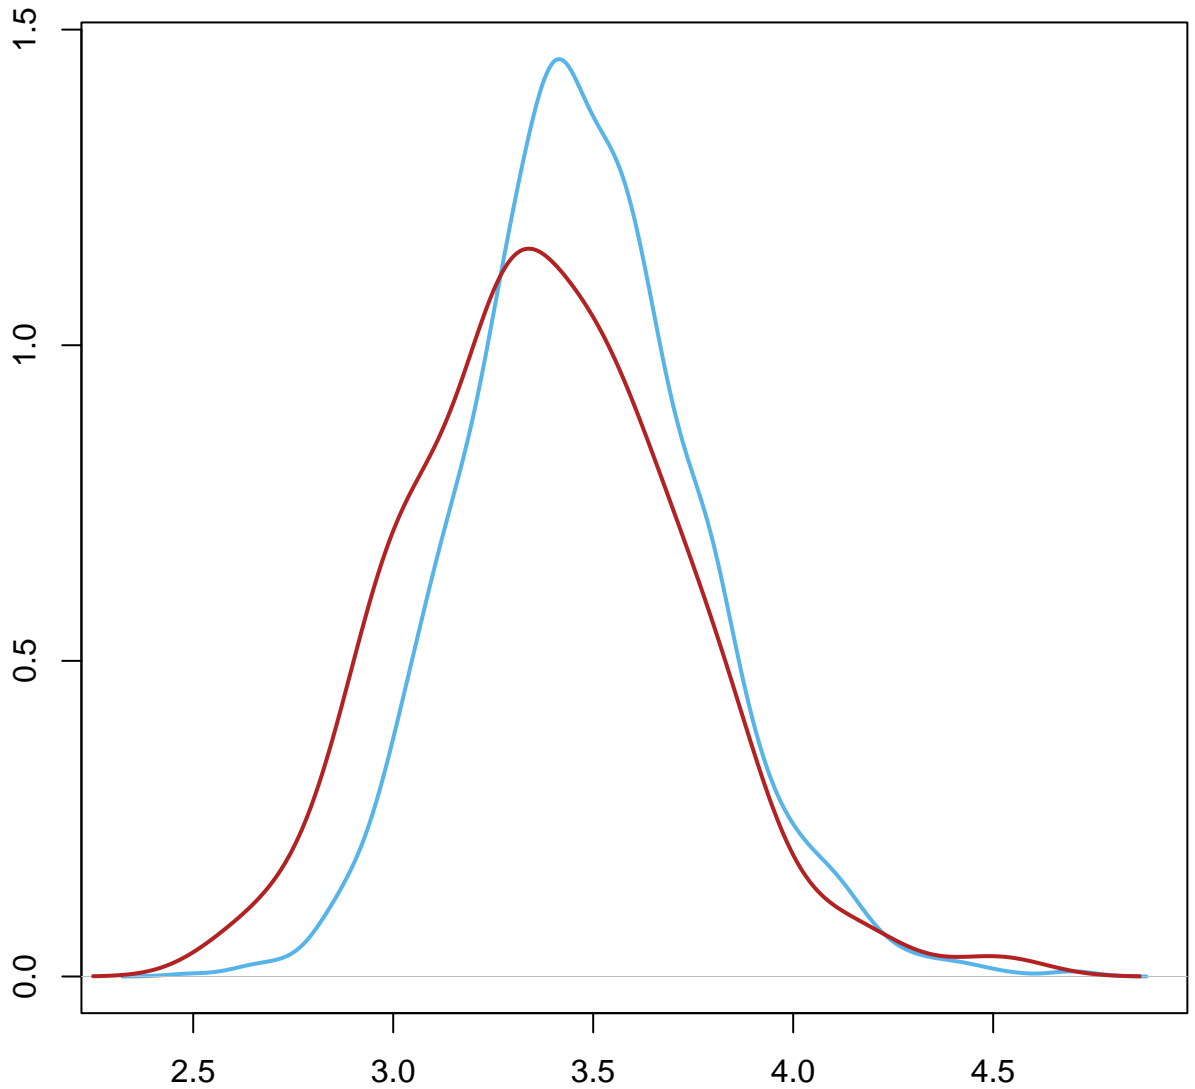

In\_Mo

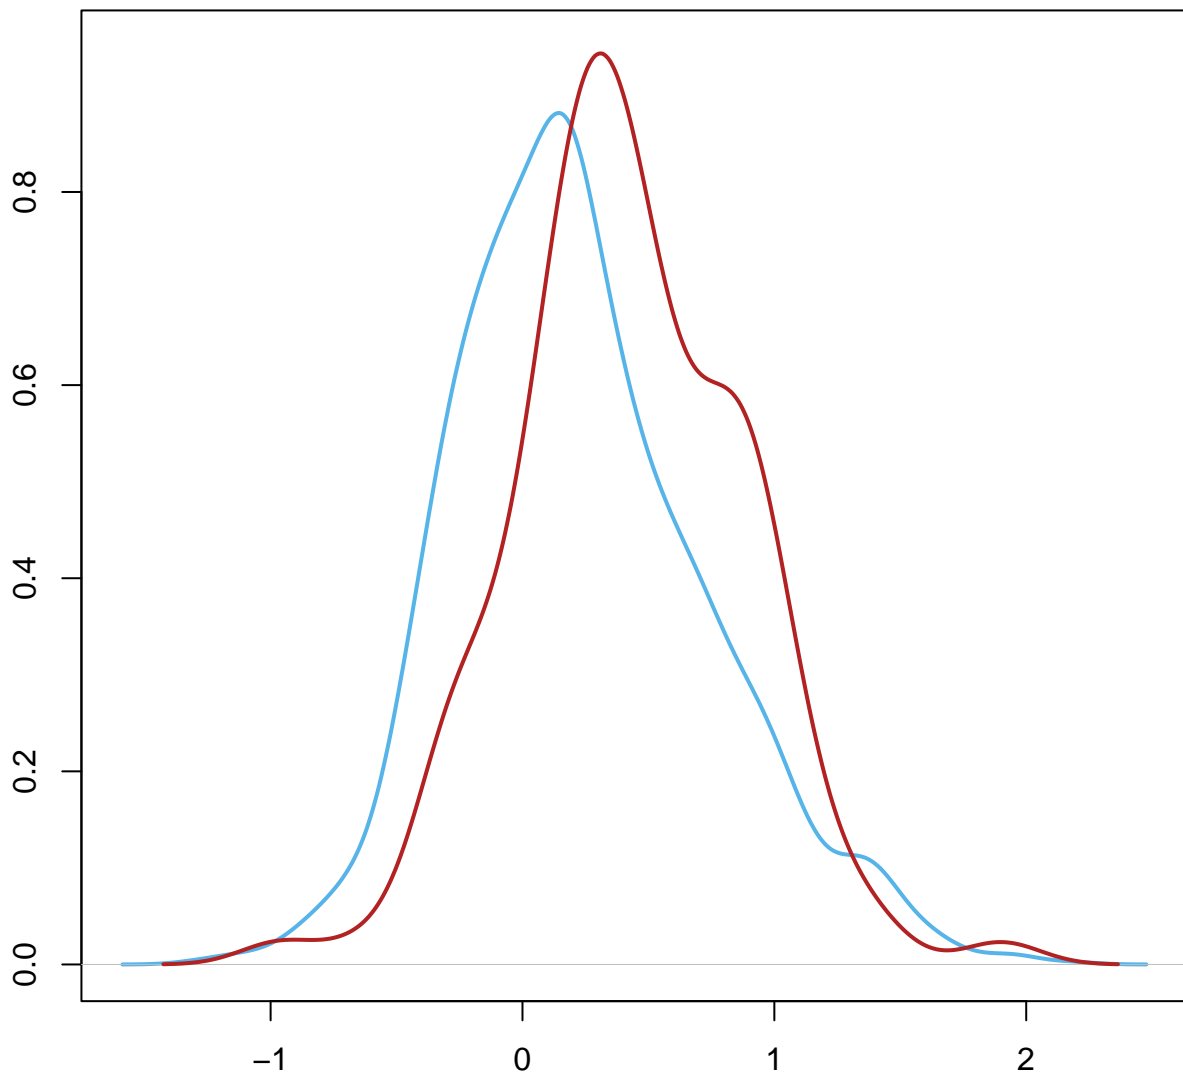

ln\_Ag

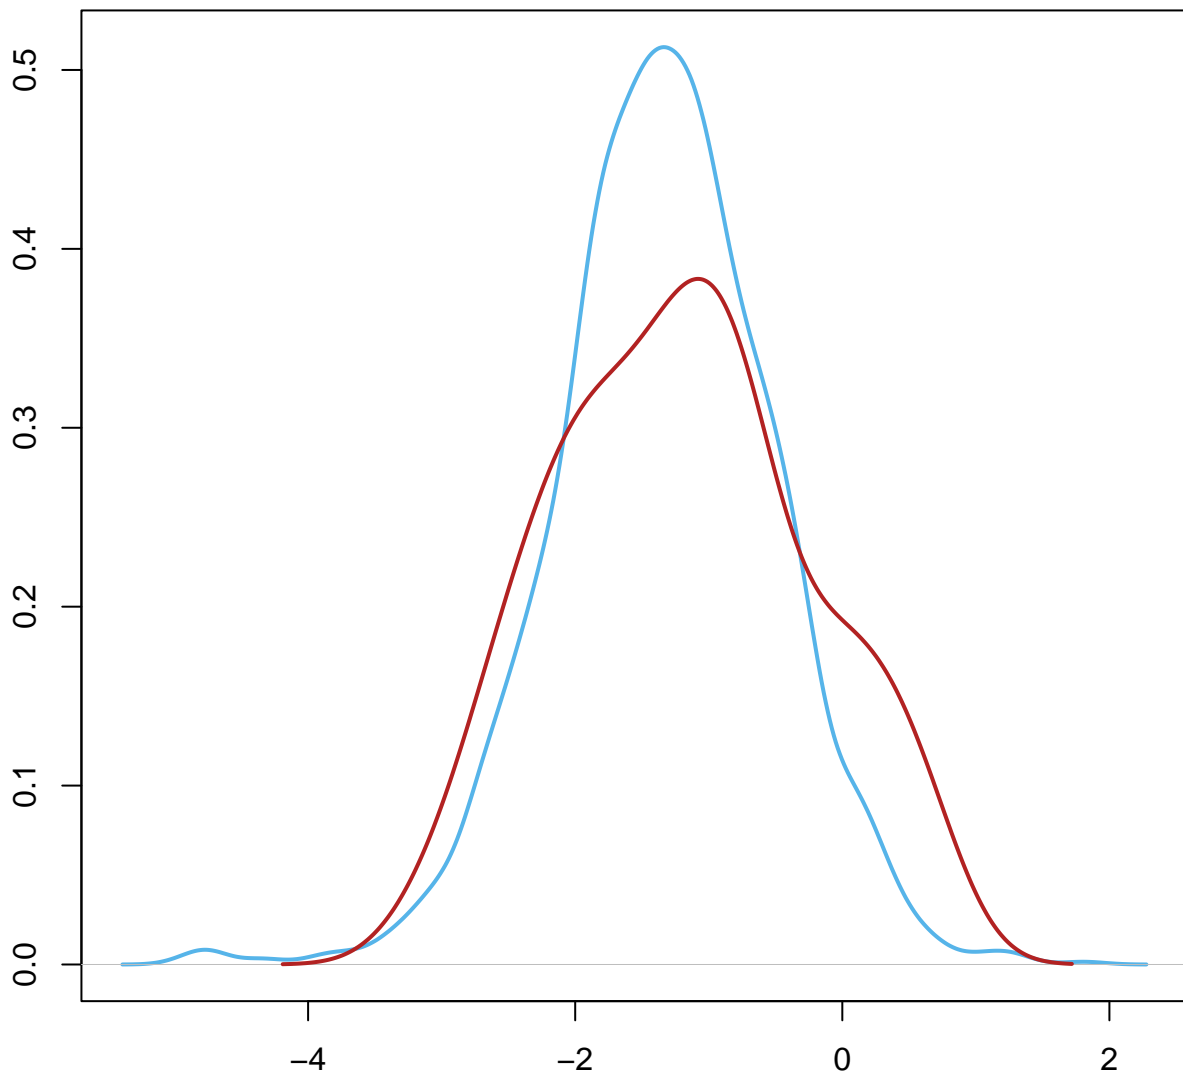



ln\_Cs

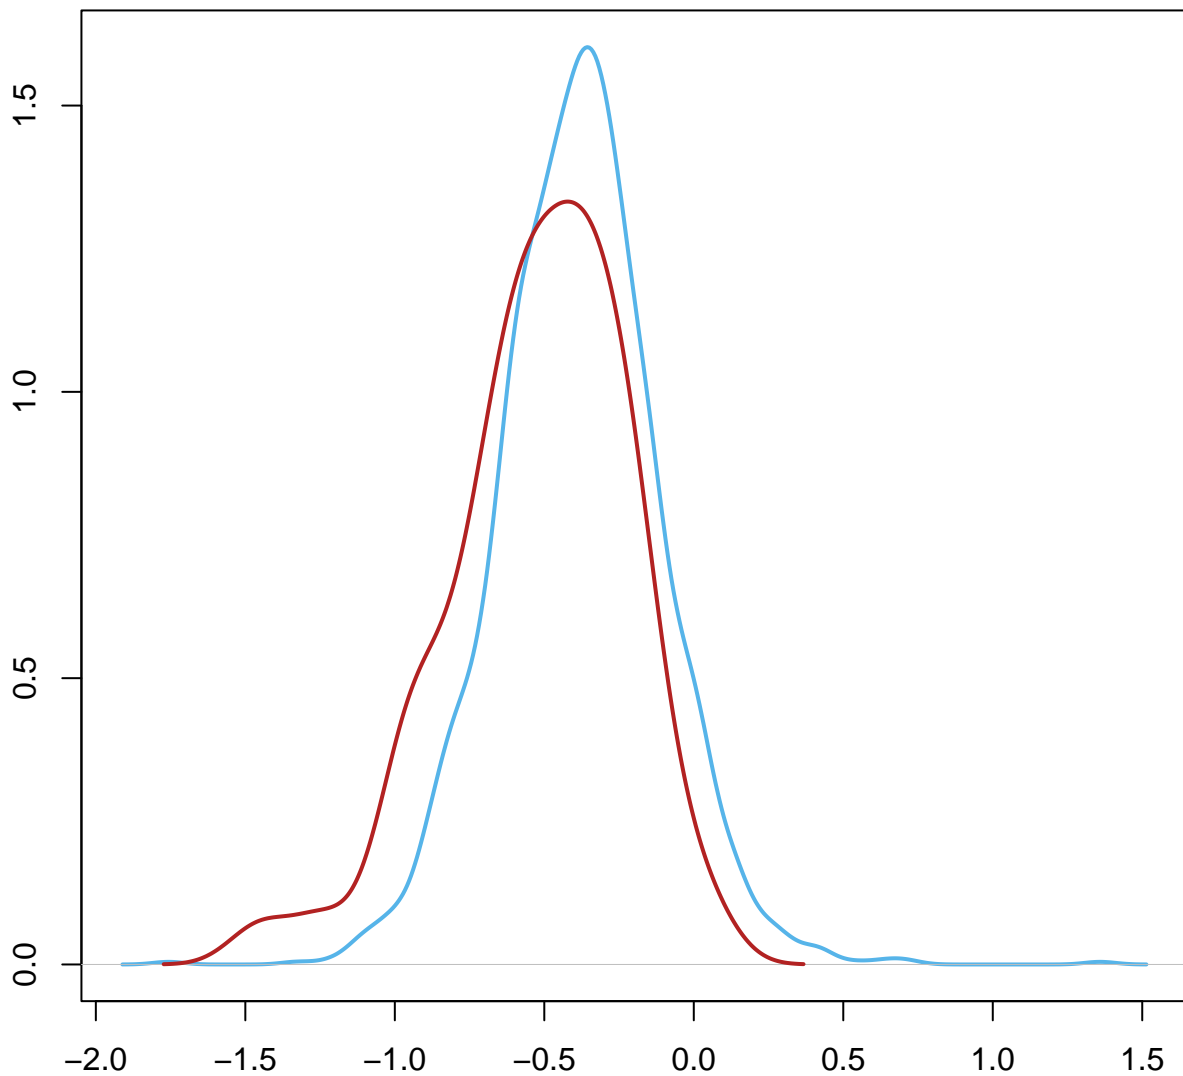

Supplement: Supporting_Figure_1.zip [file Supporting_Figure_1.zip]

In\_Na

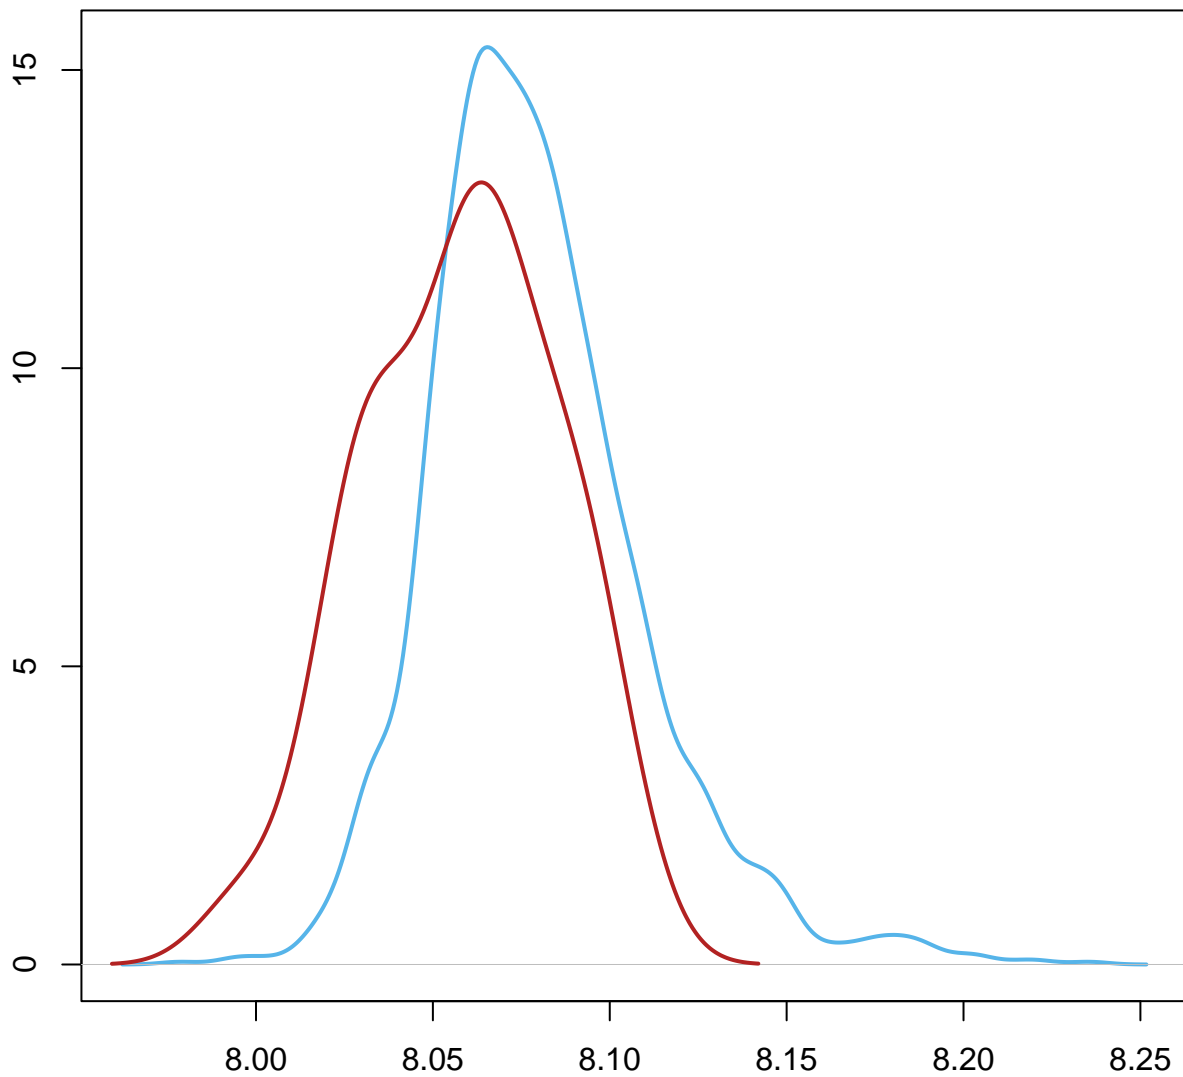

ln\_Mg

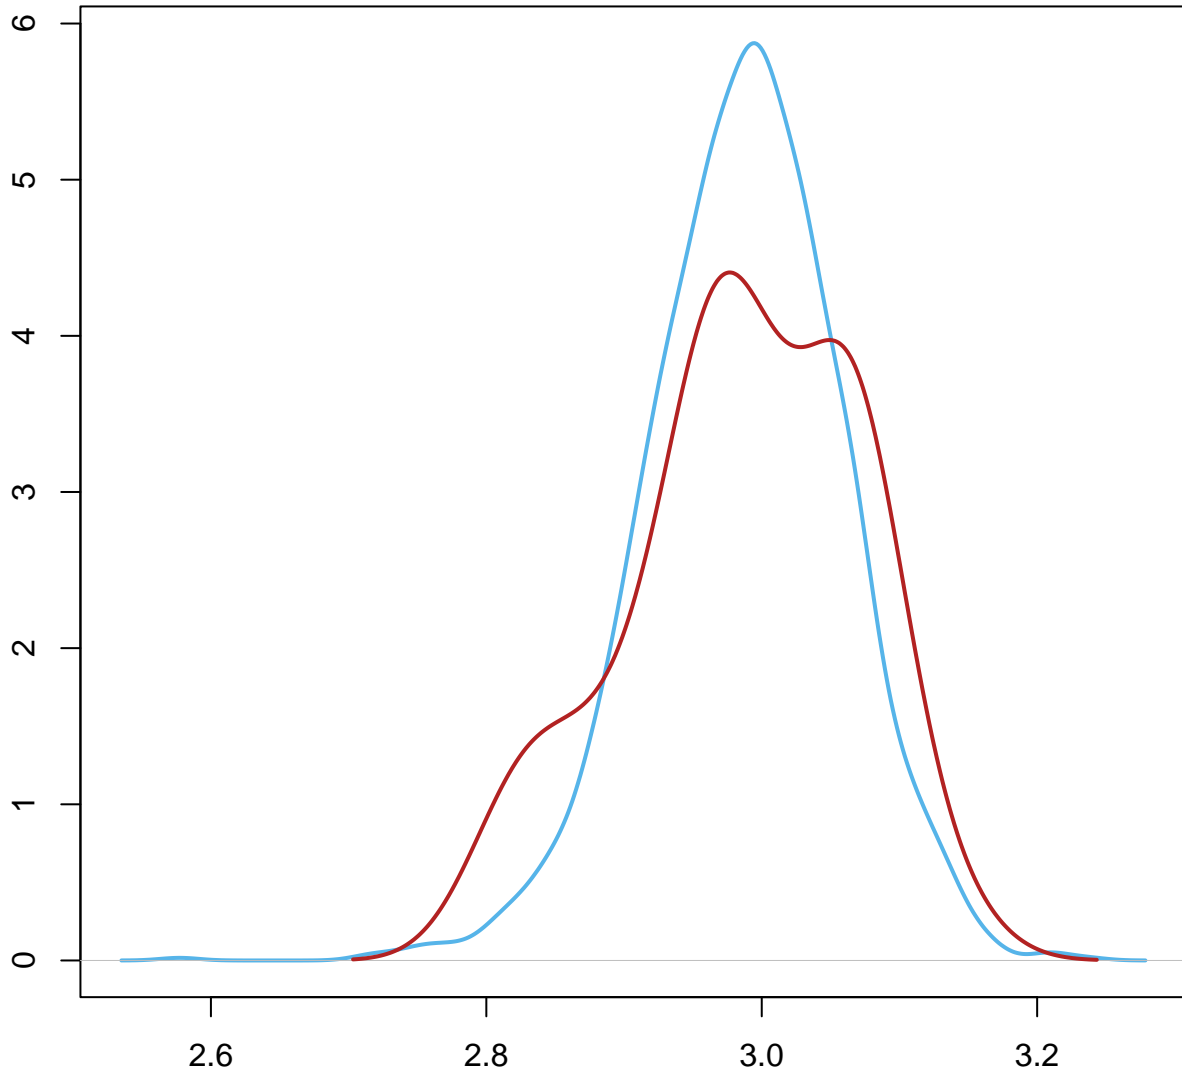

ln\_P

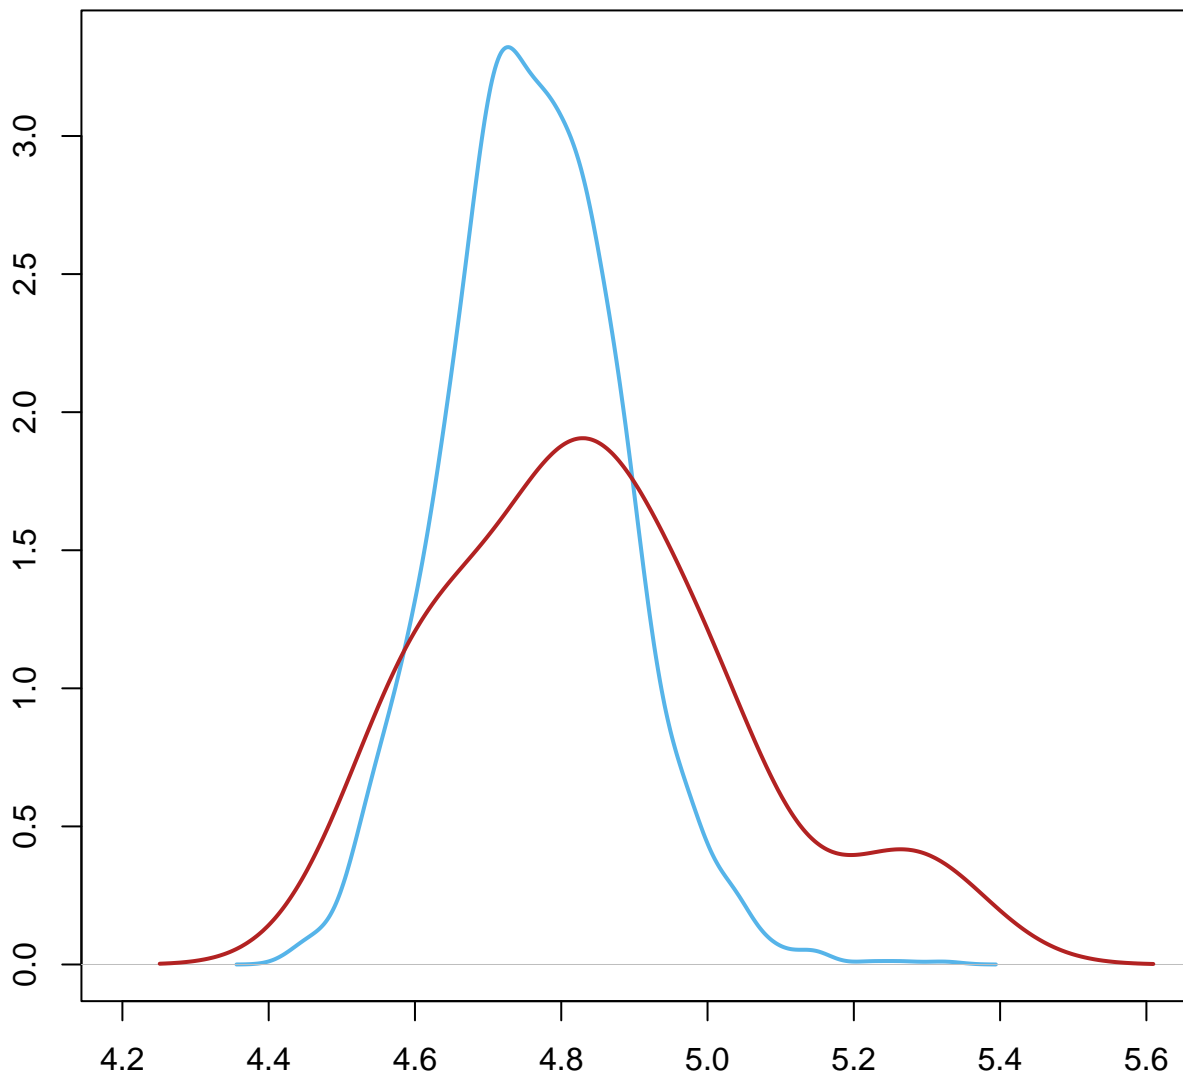

ln\_S

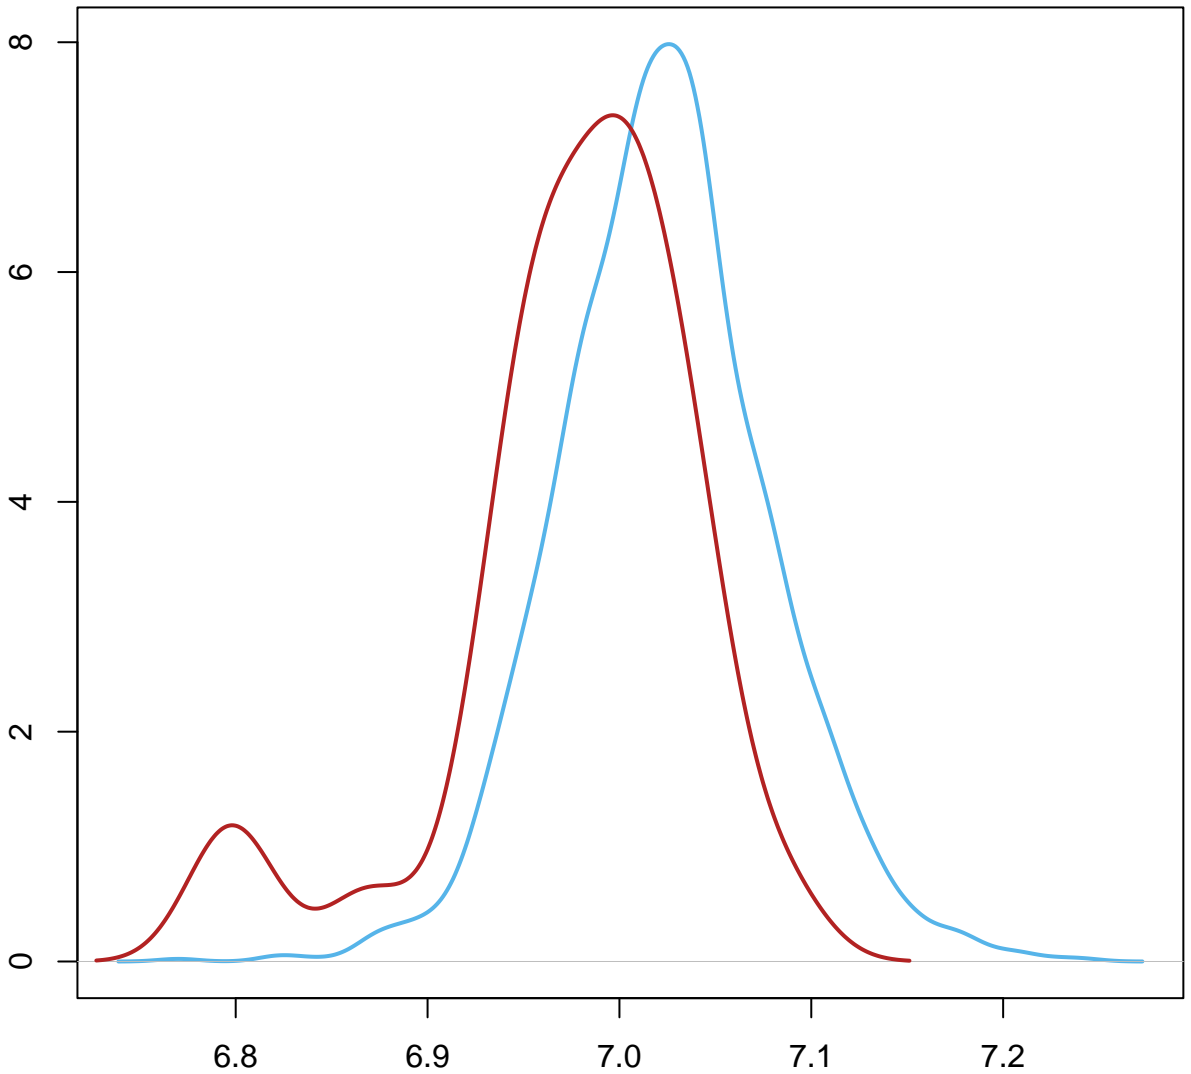

$\ln_K$

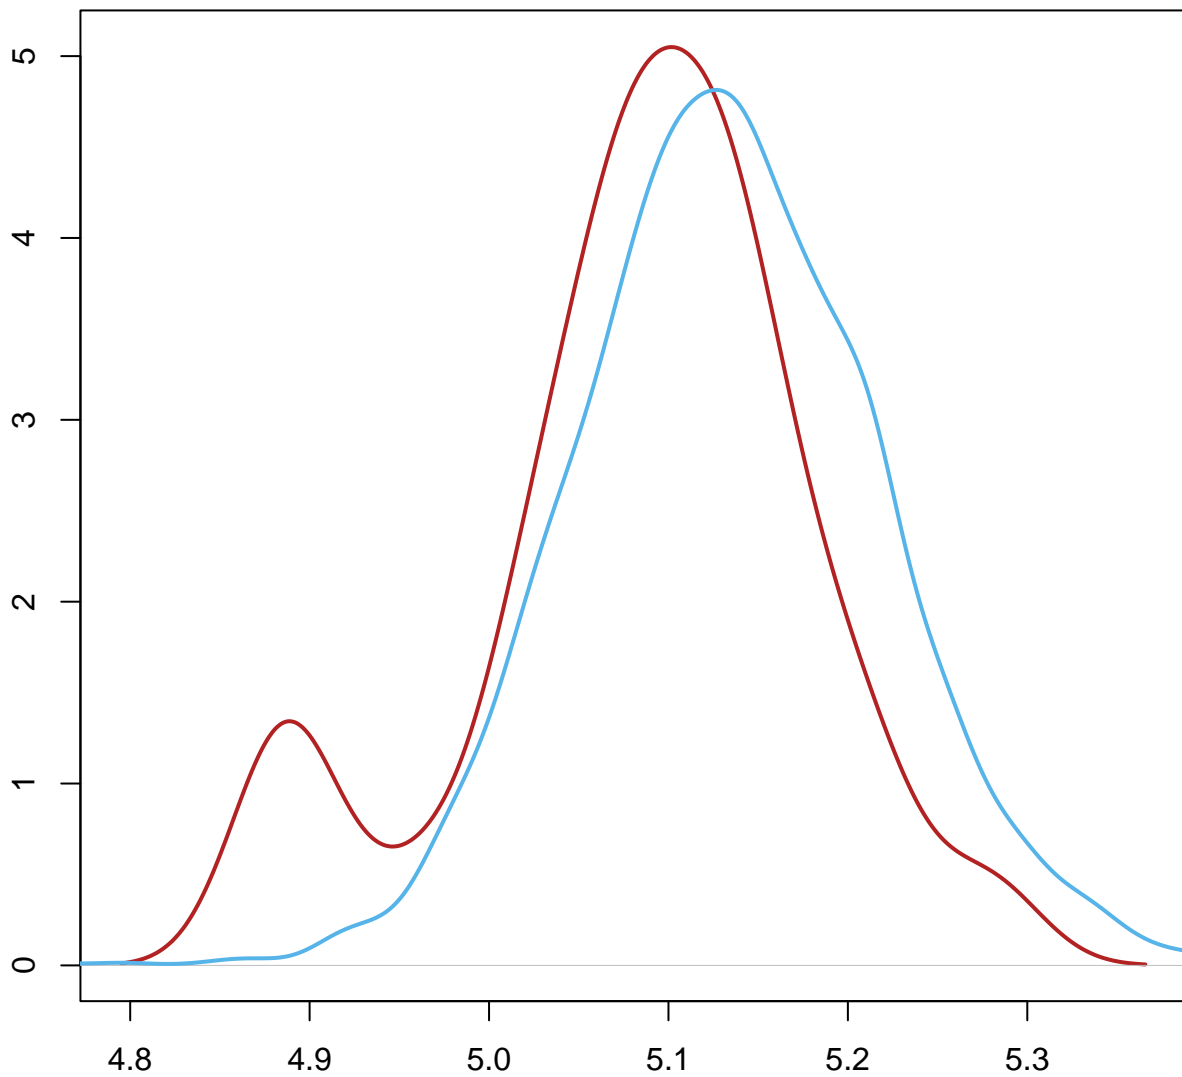

In\_Ca

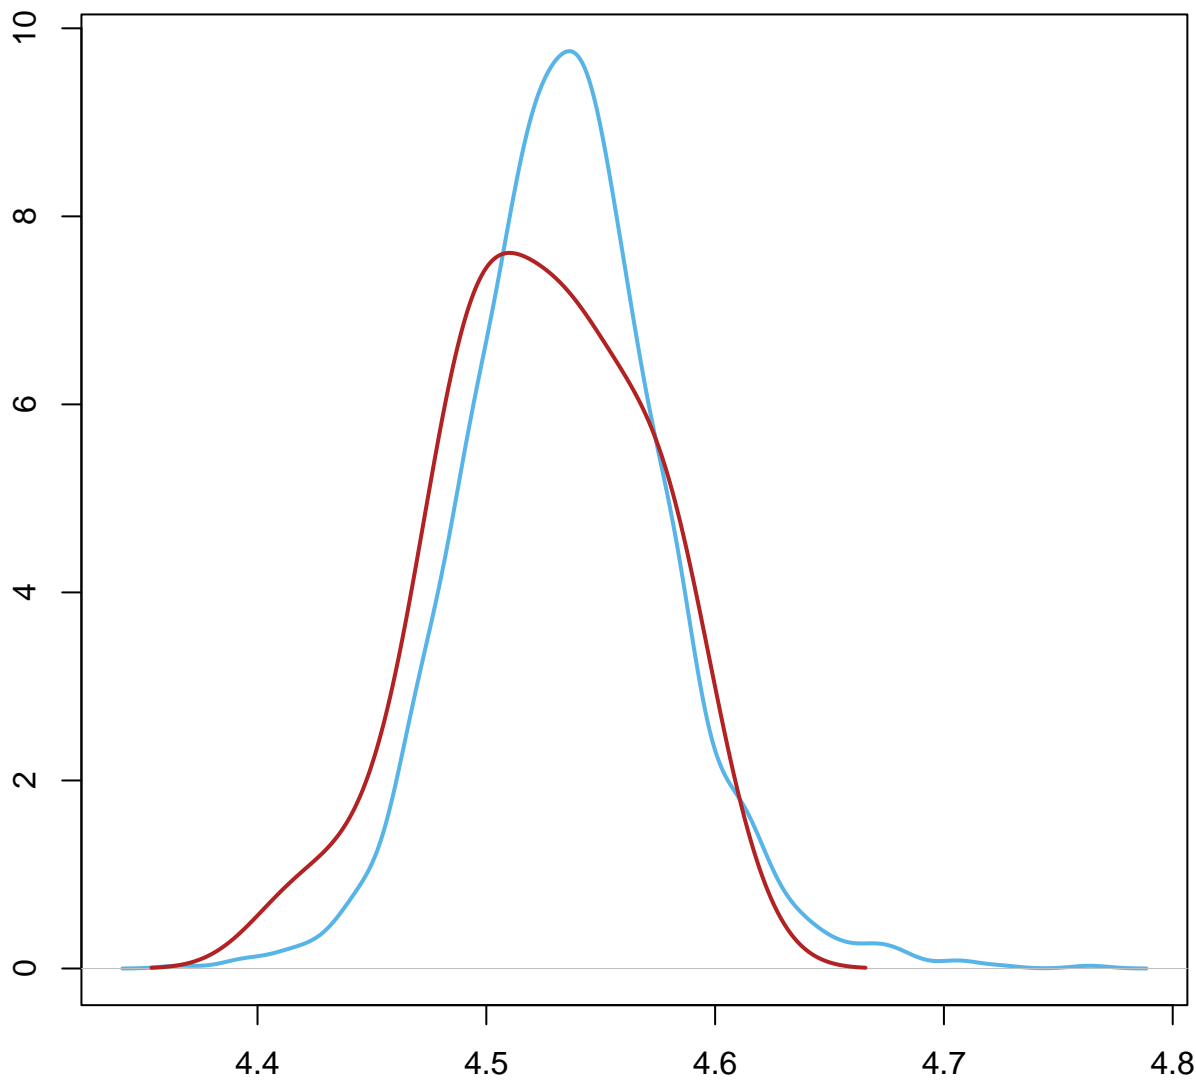

In\_Fe

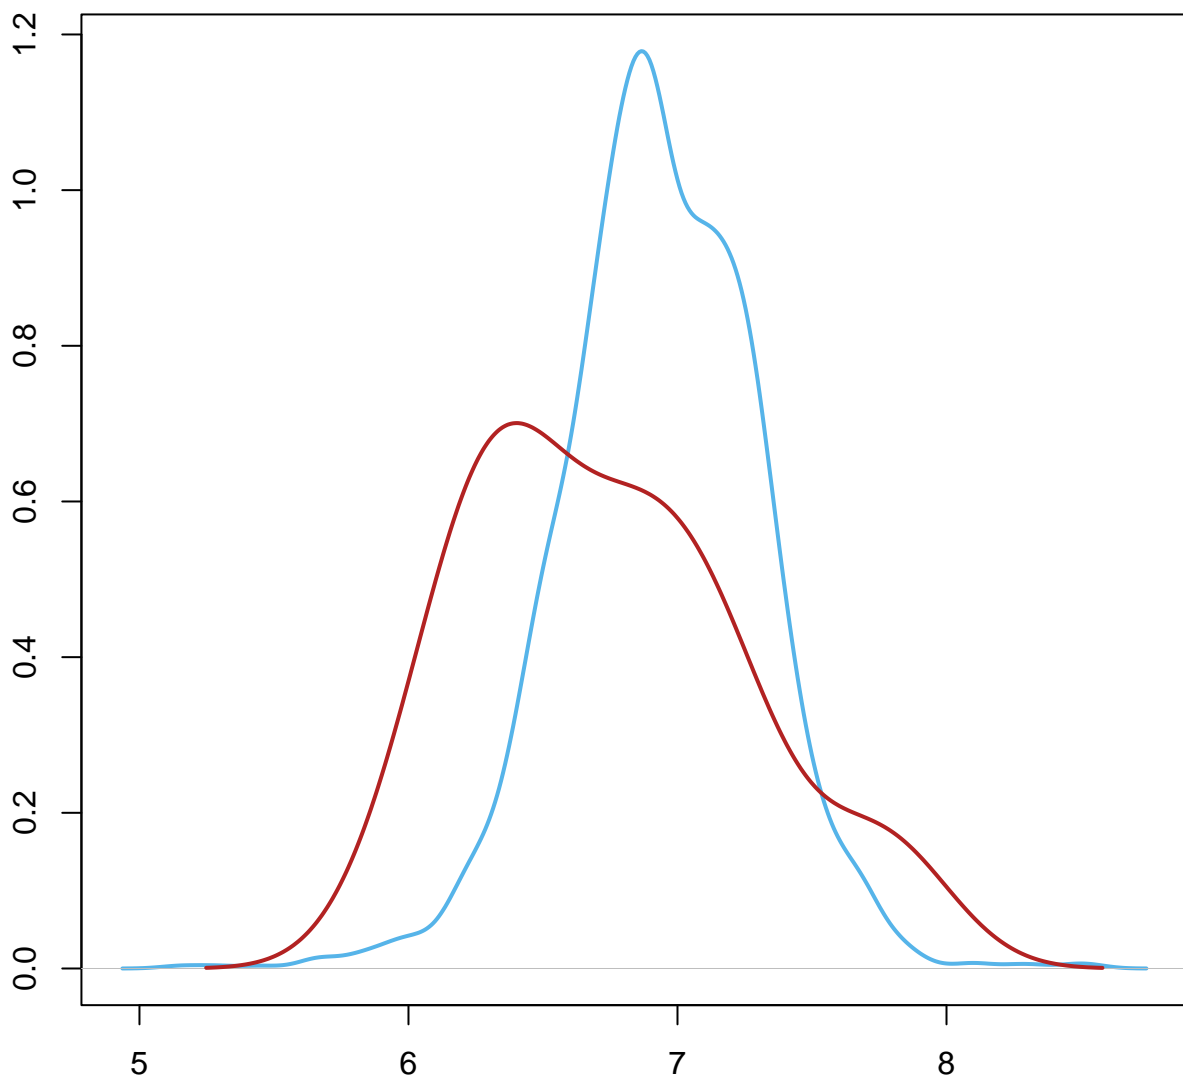

In\_Co

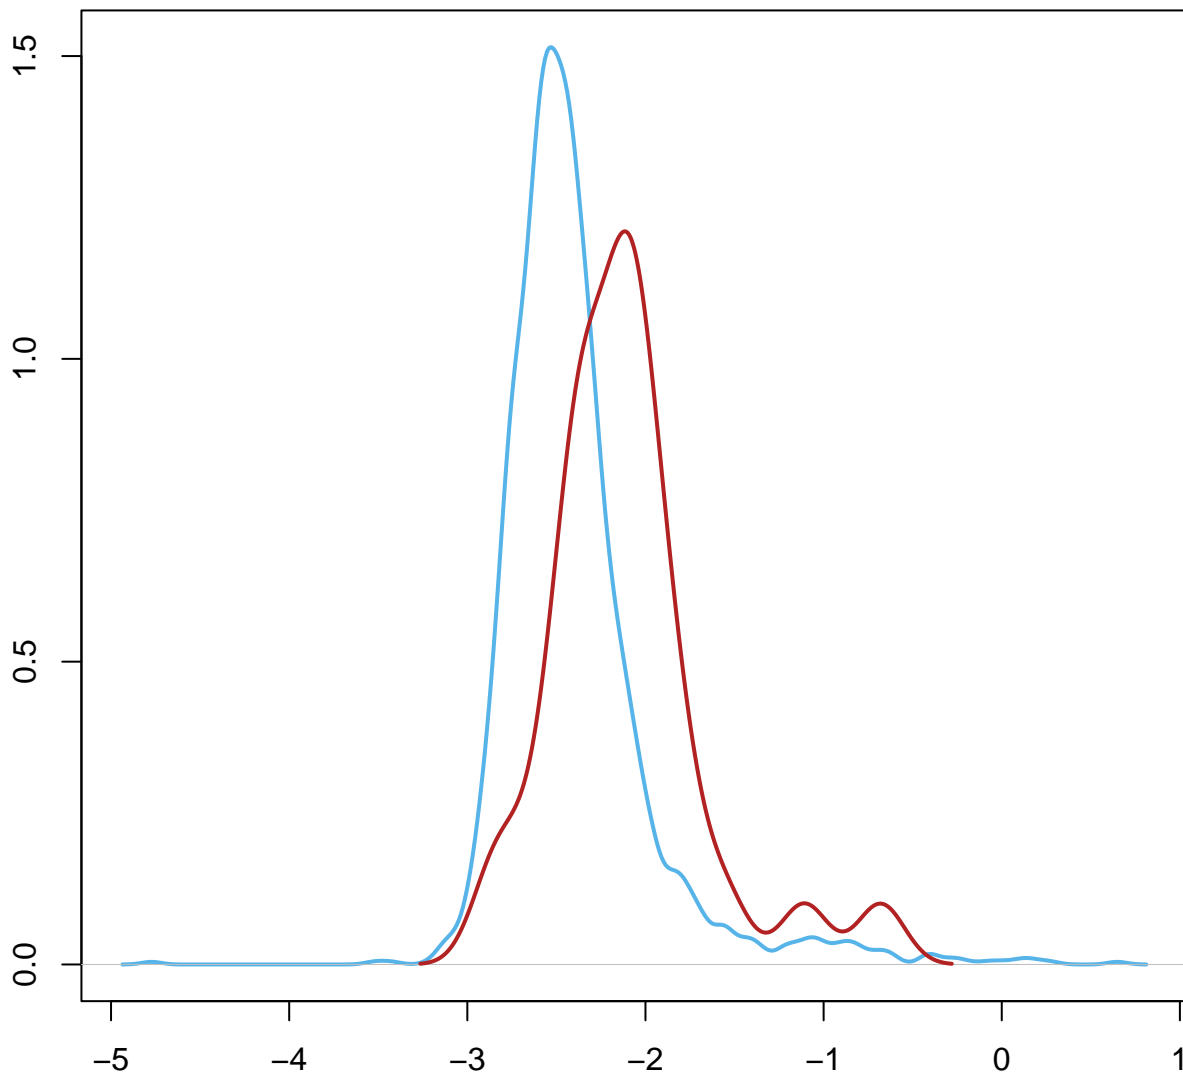



In\_Cu

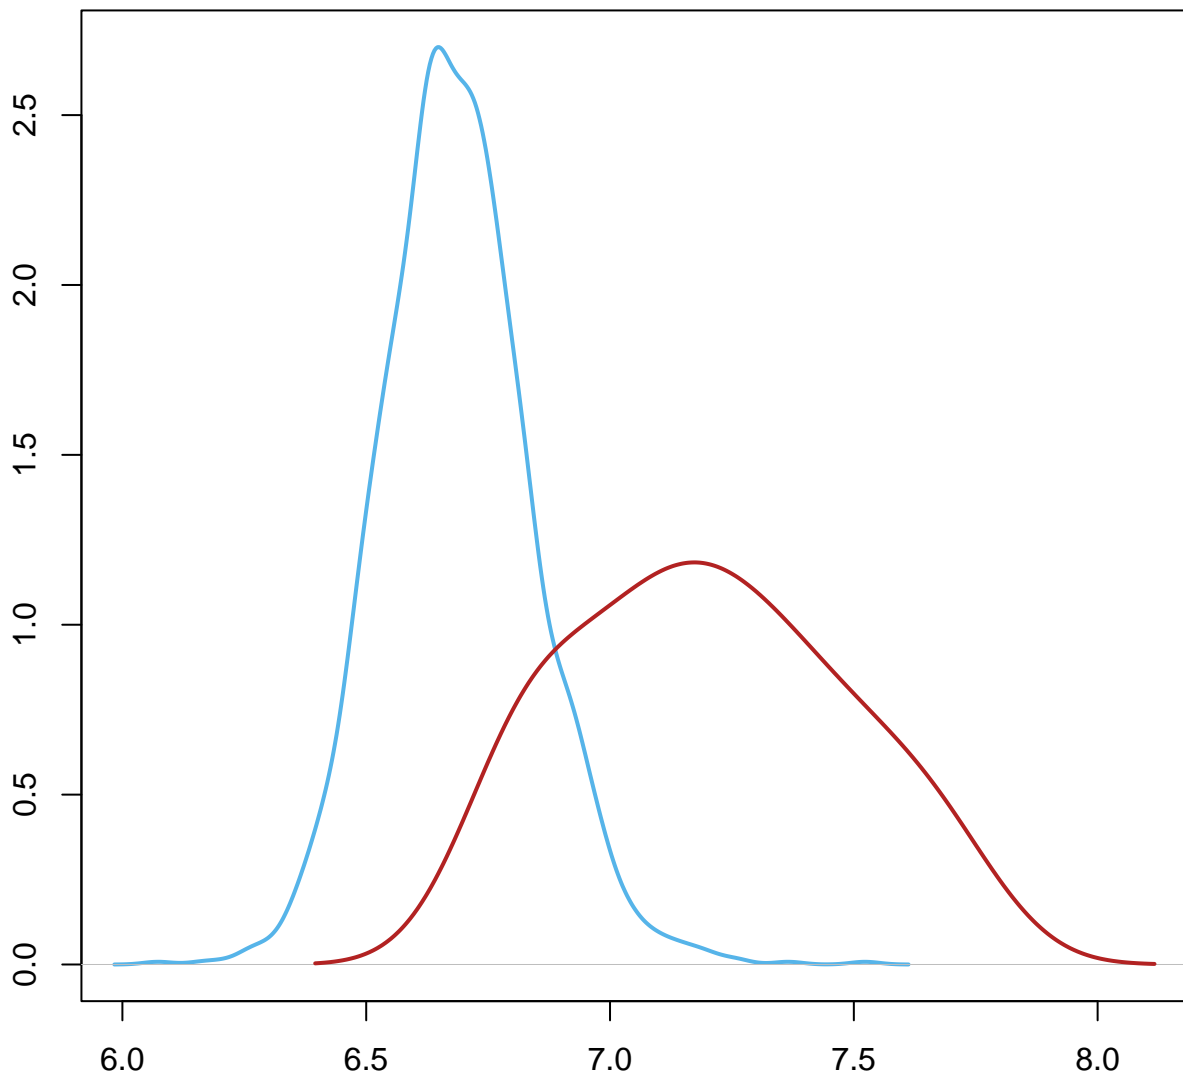

ln\_Zn

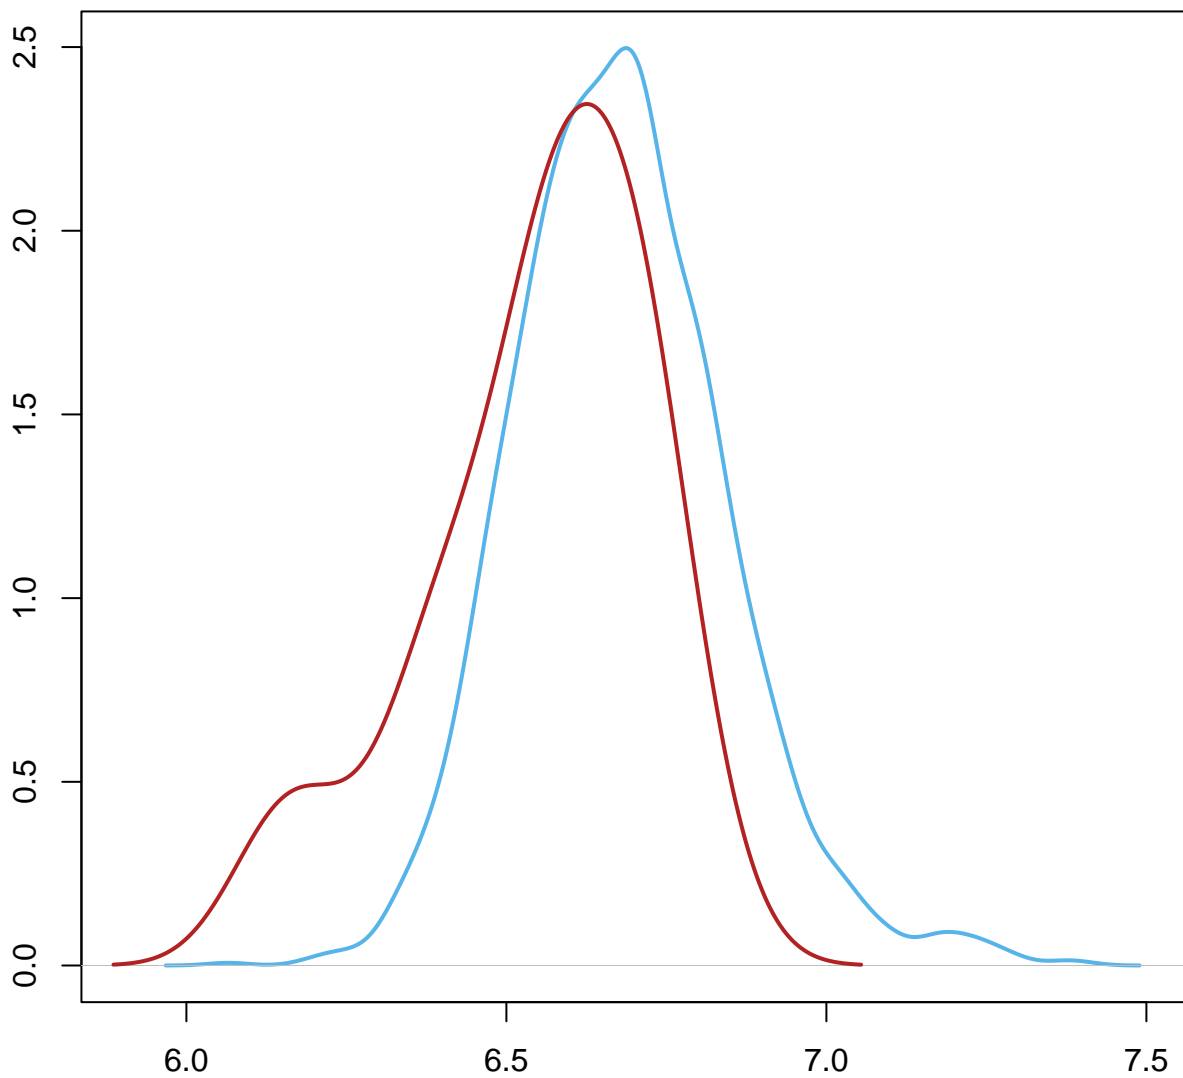

In\_As

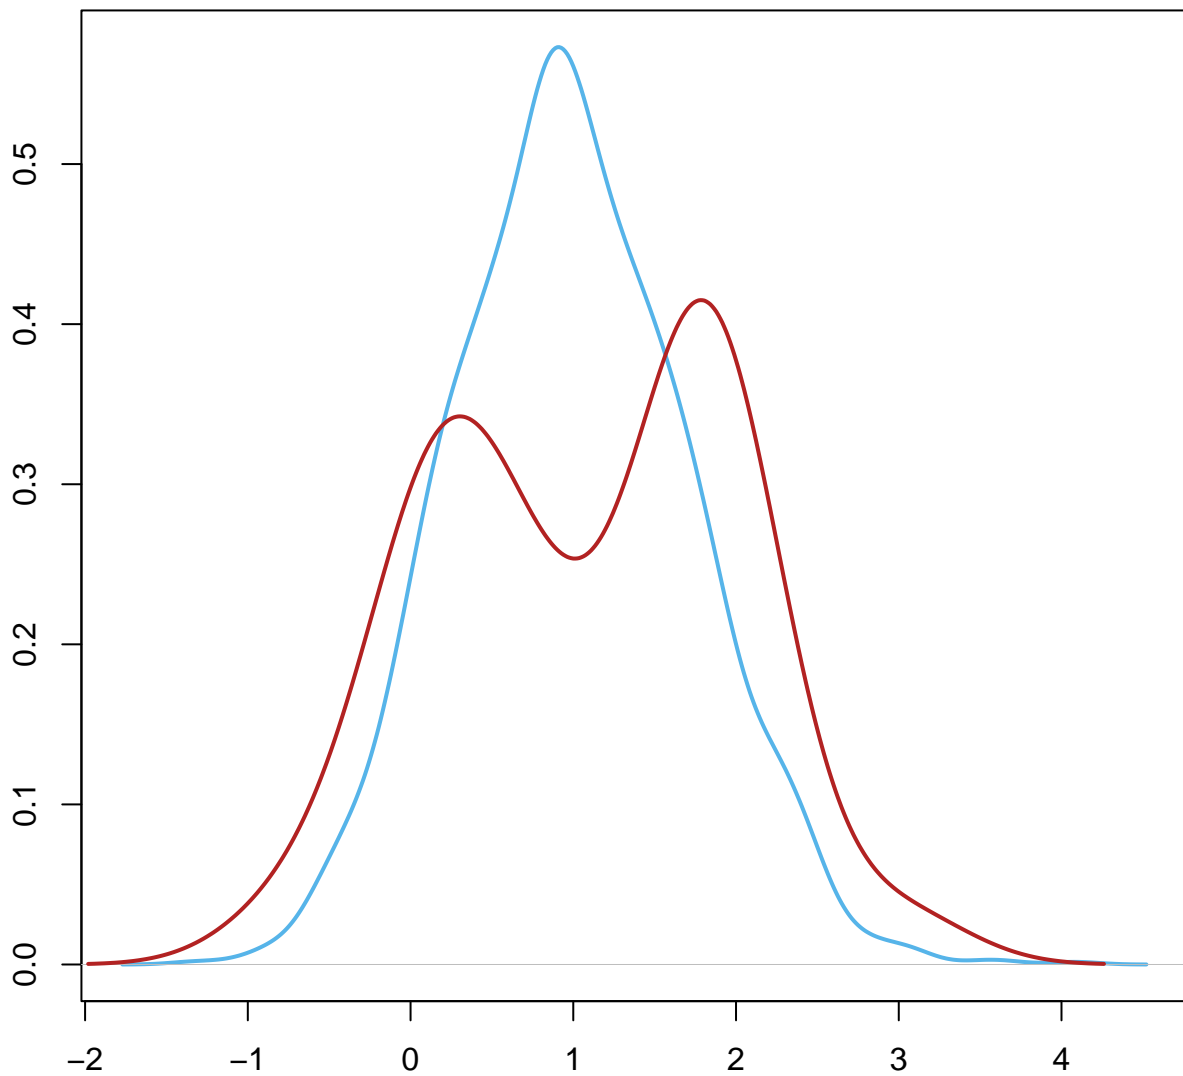

In\_Se

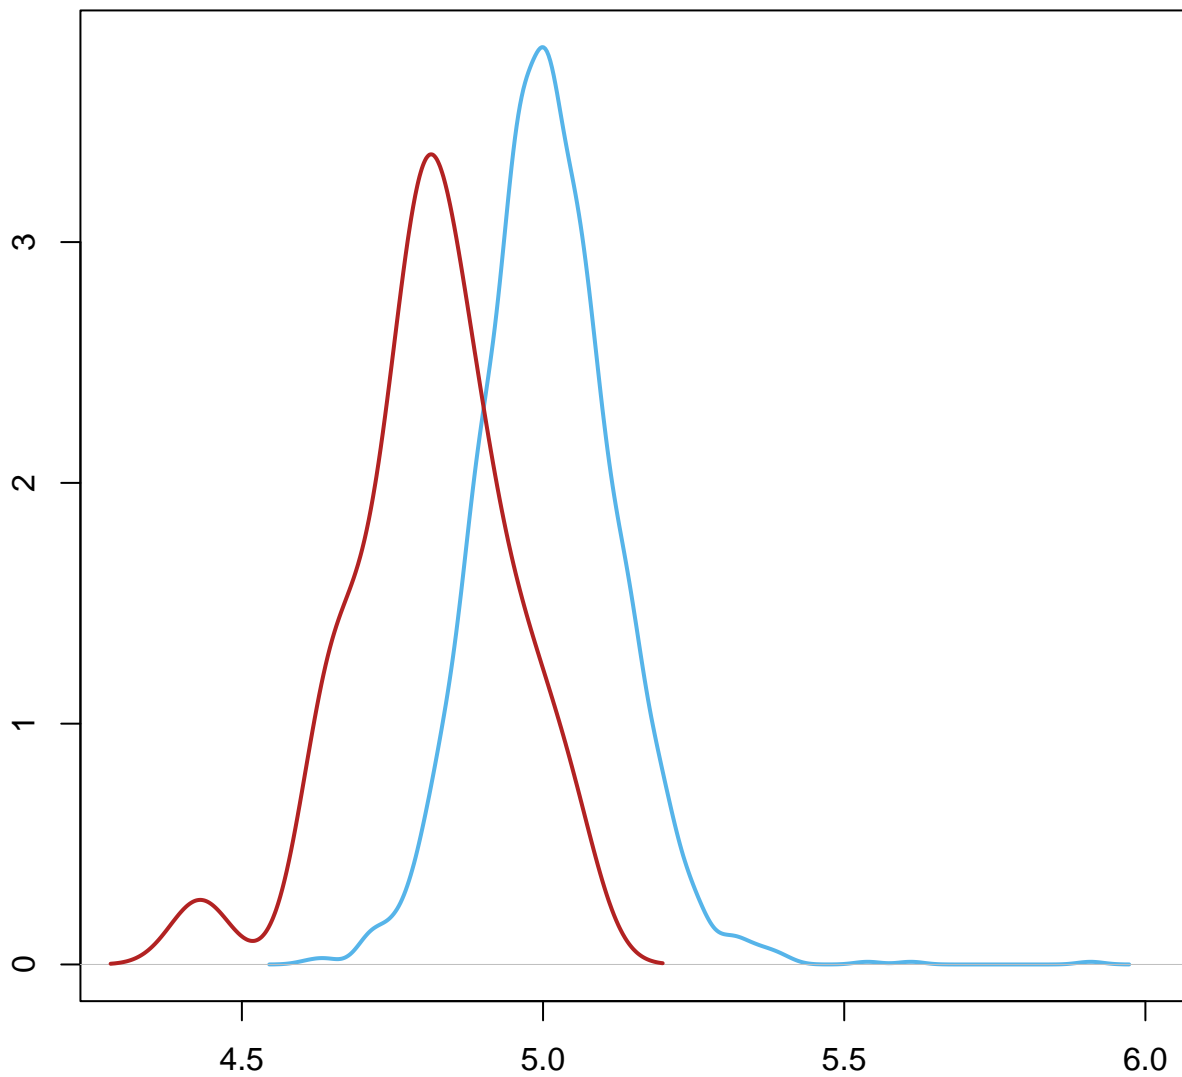

**ln\_Rb**

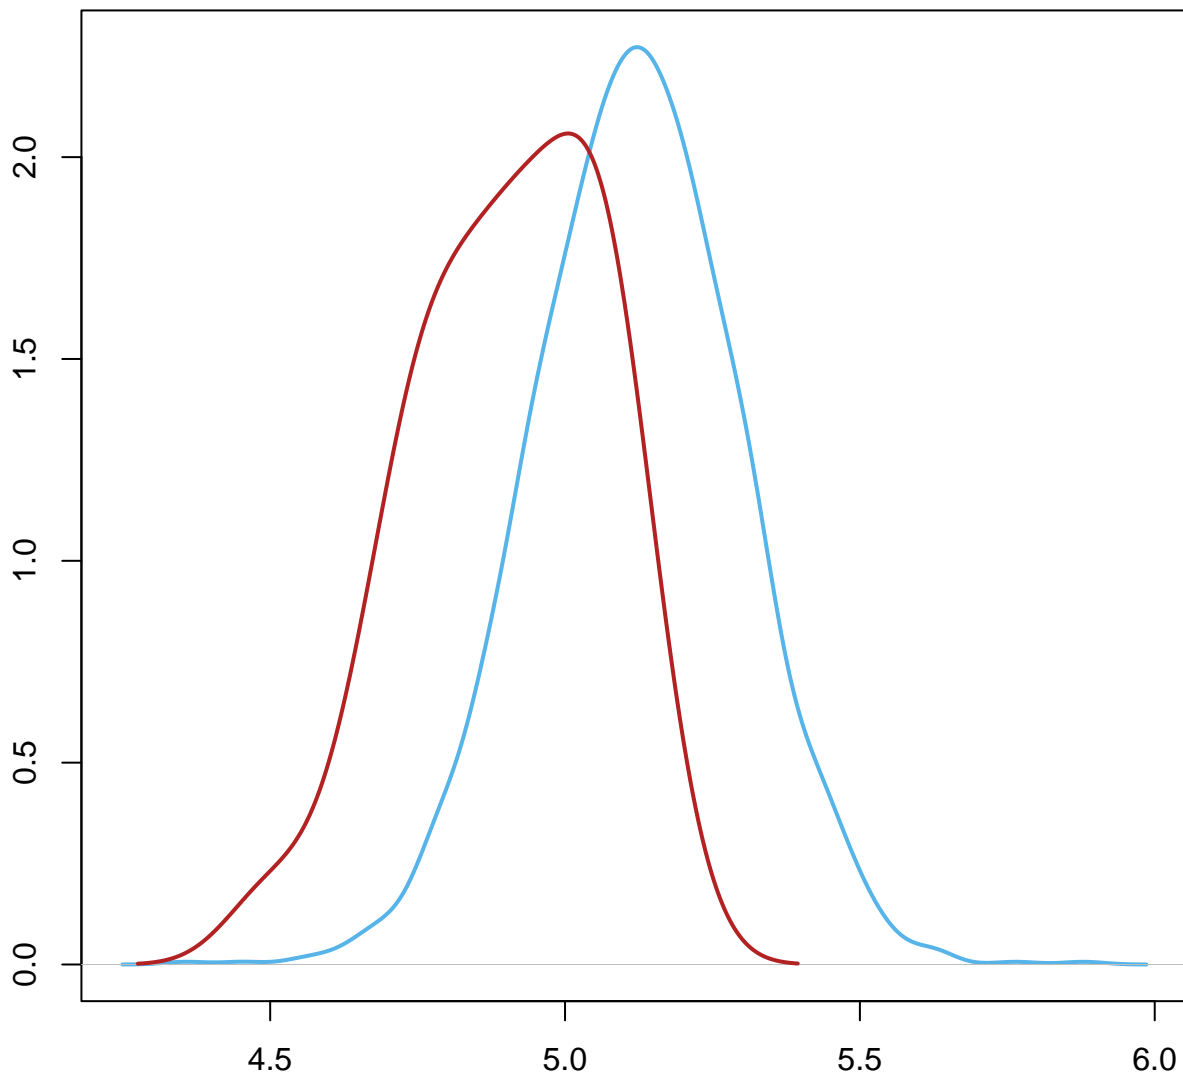

In\_Sr

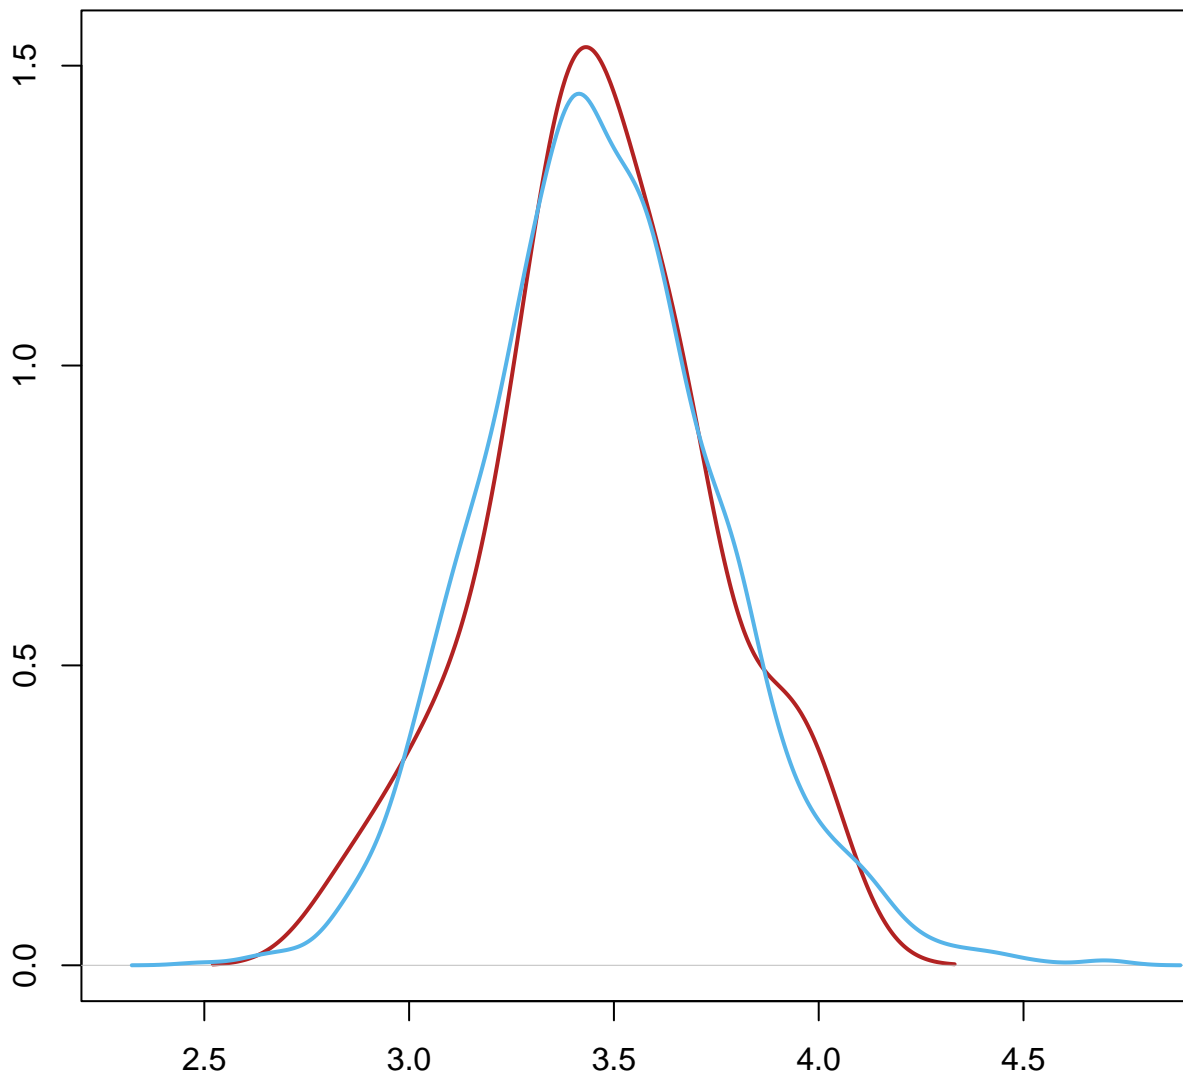

In\_Mo

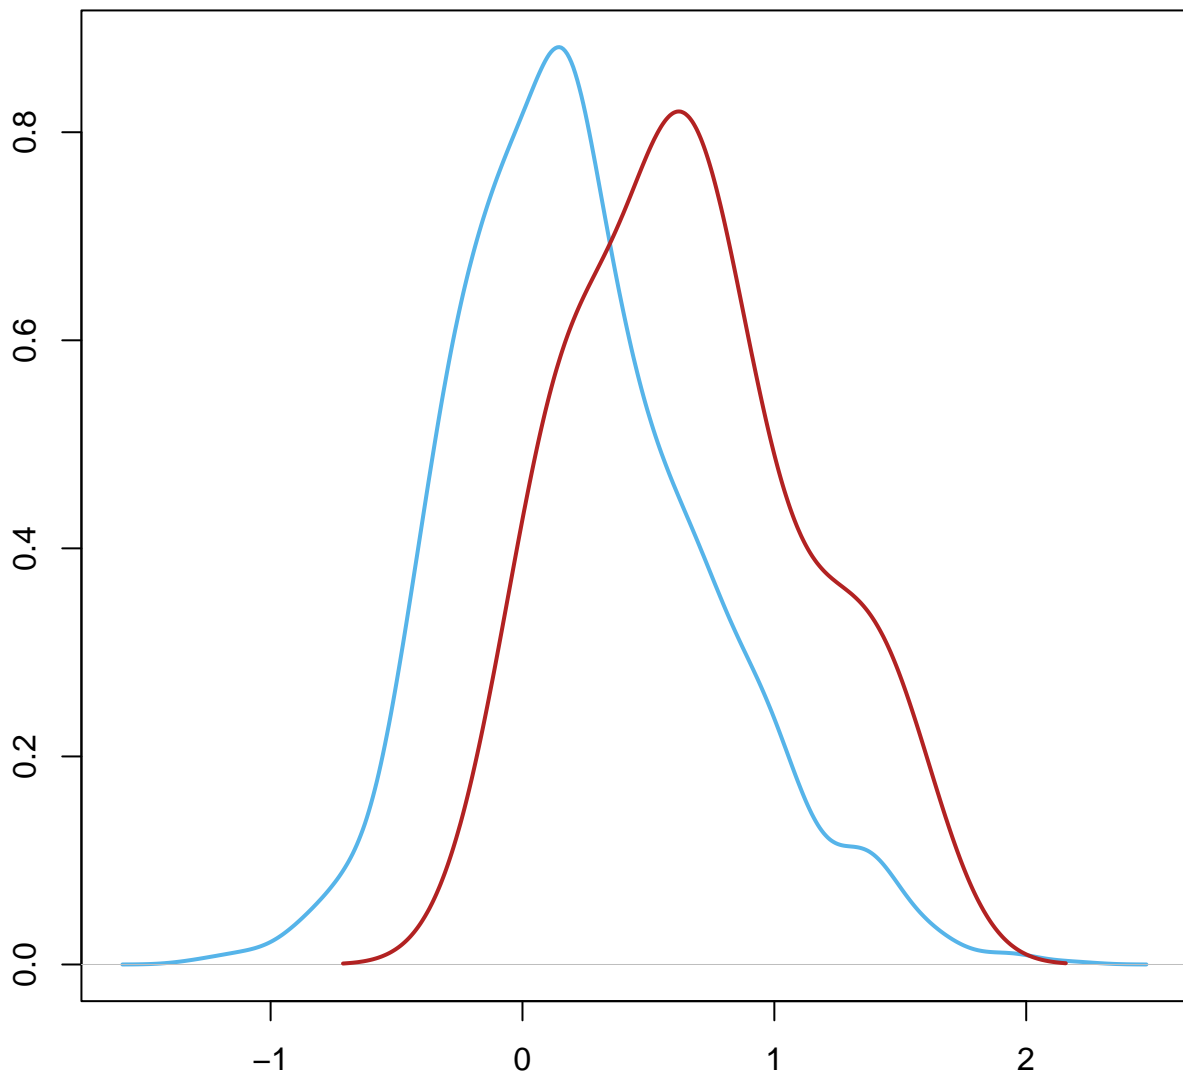

In\_Ag

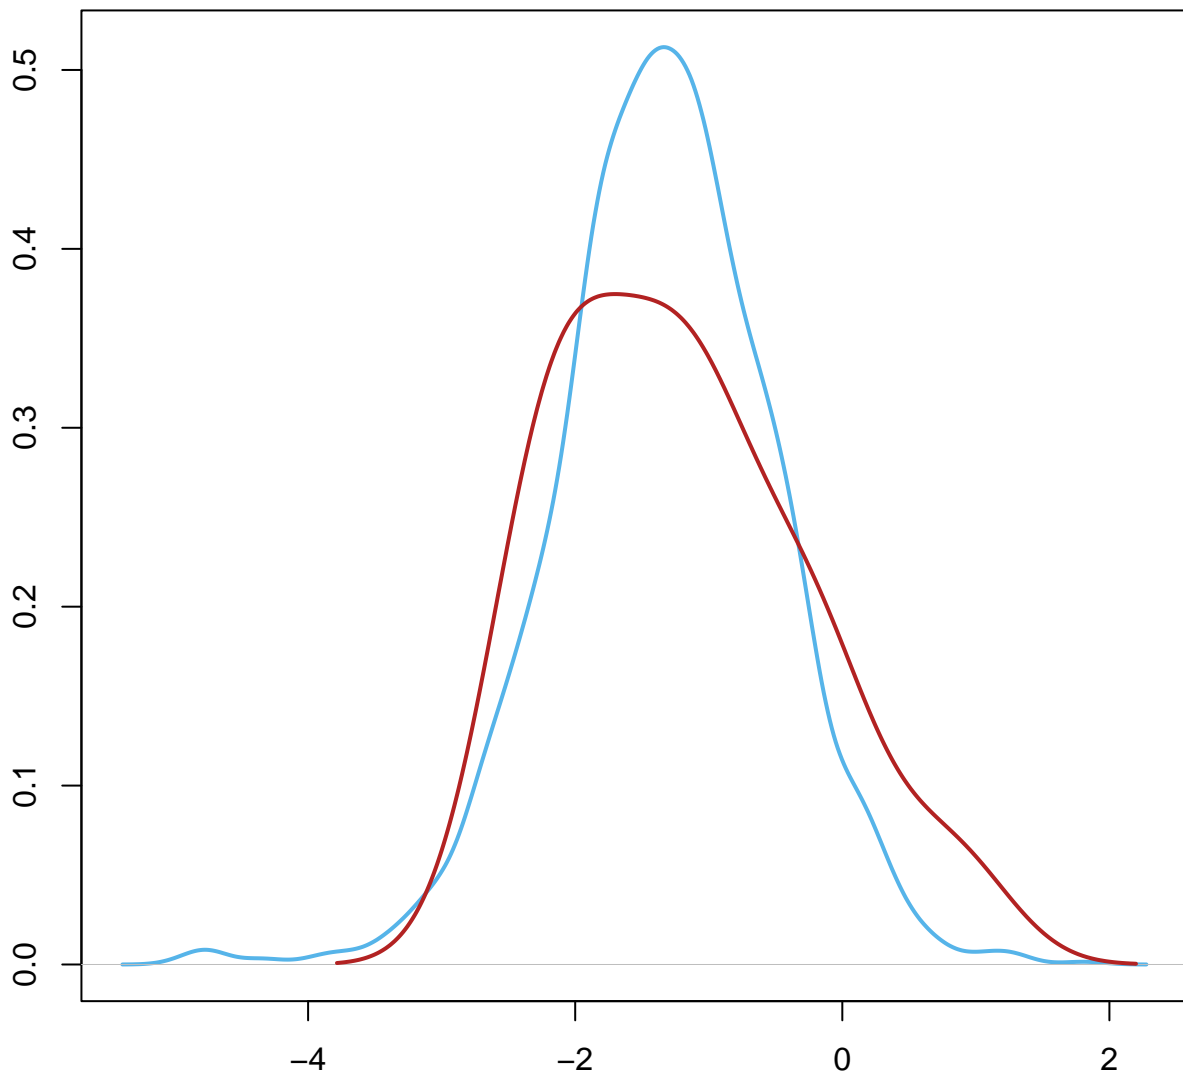



**ln\_Cs**

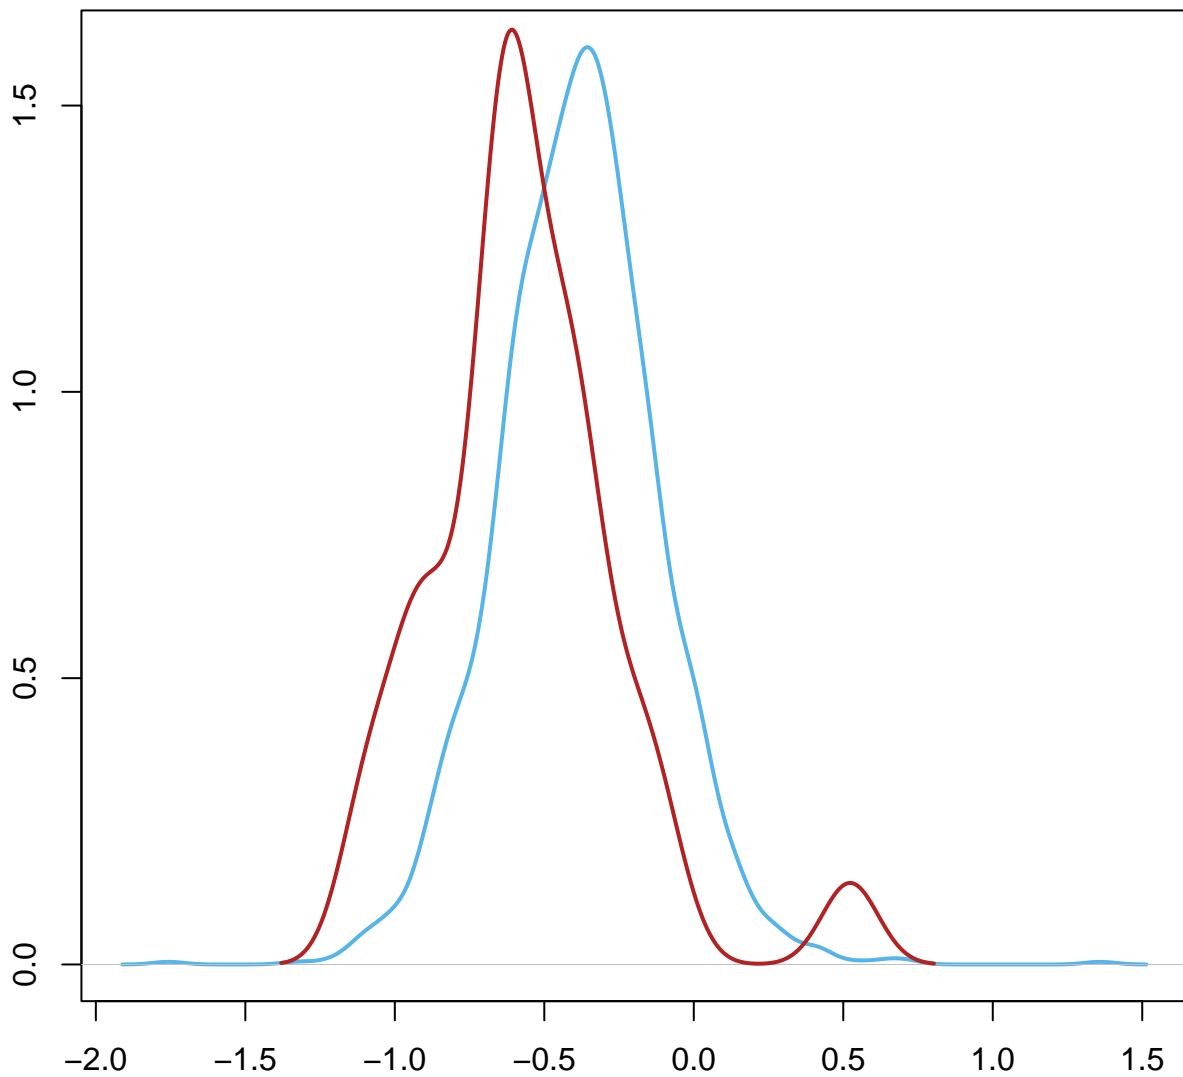

Supplement: Supporting_Figure_1.zip [file Supporting_Figure_1.zip]

In\_Na

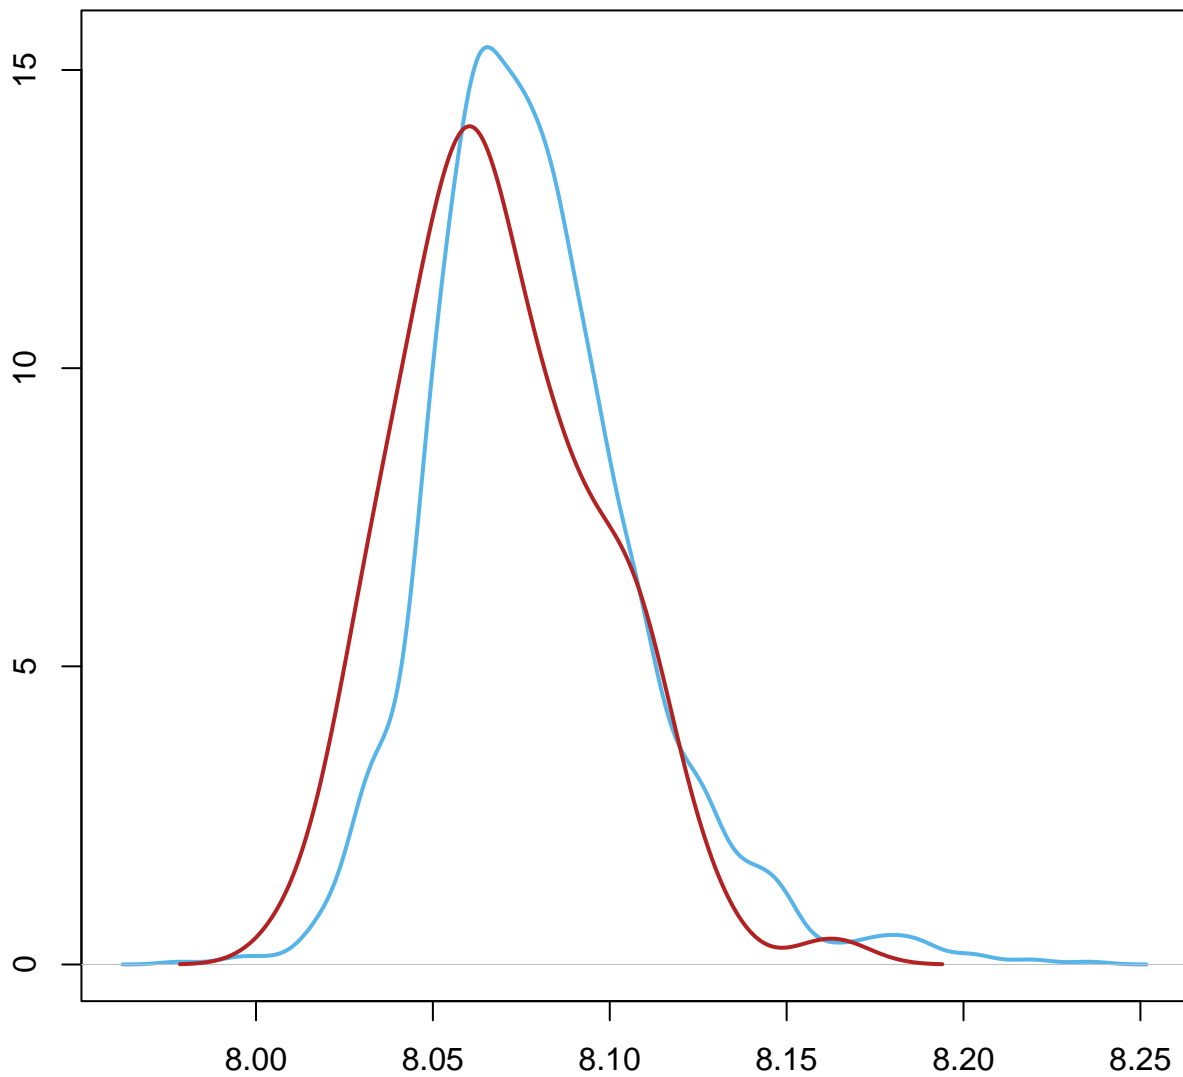

ln\_Mg

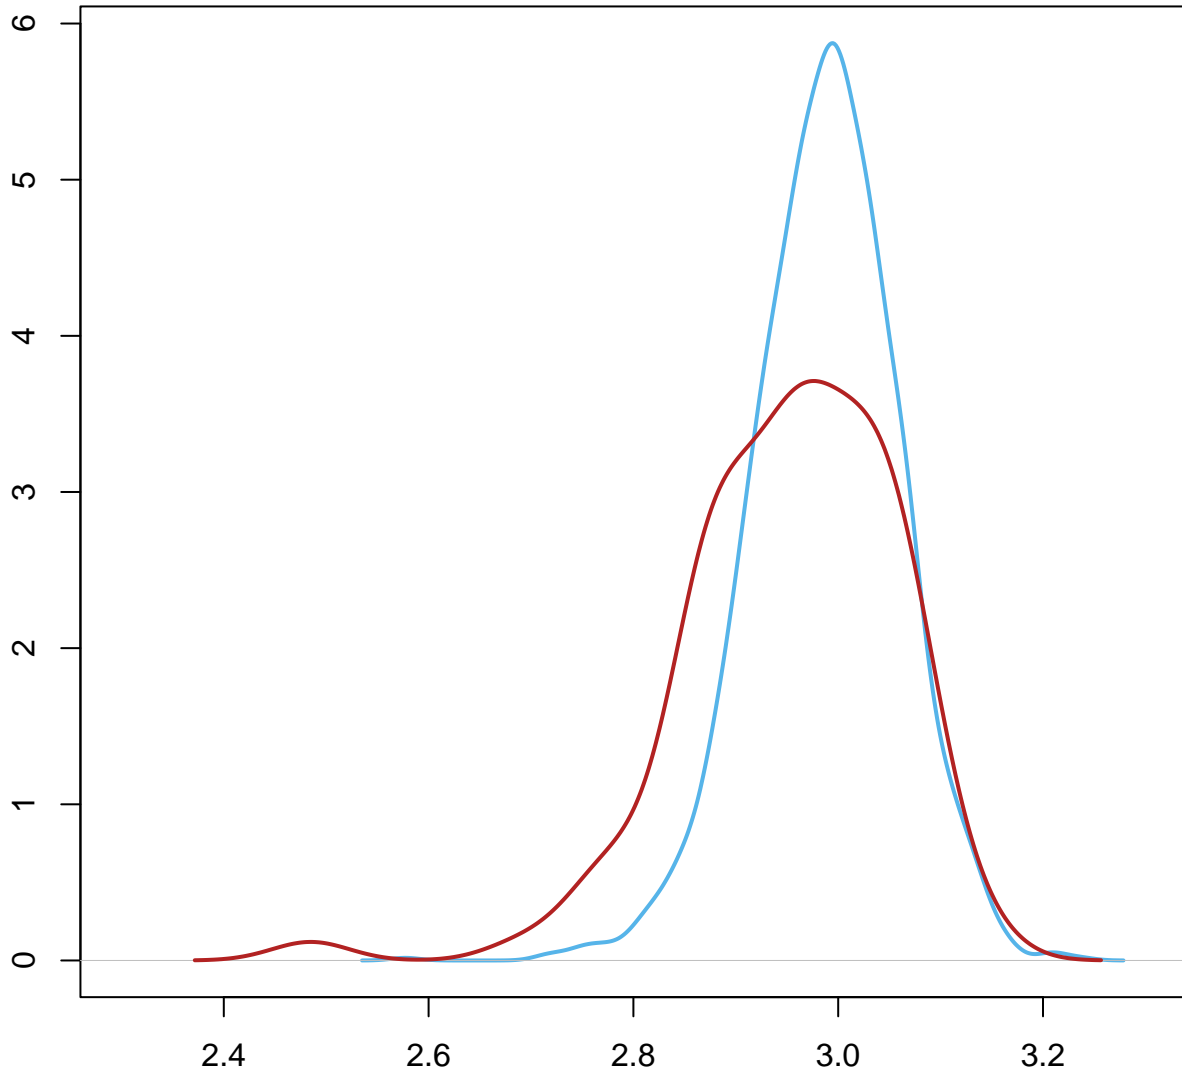

ln\_P

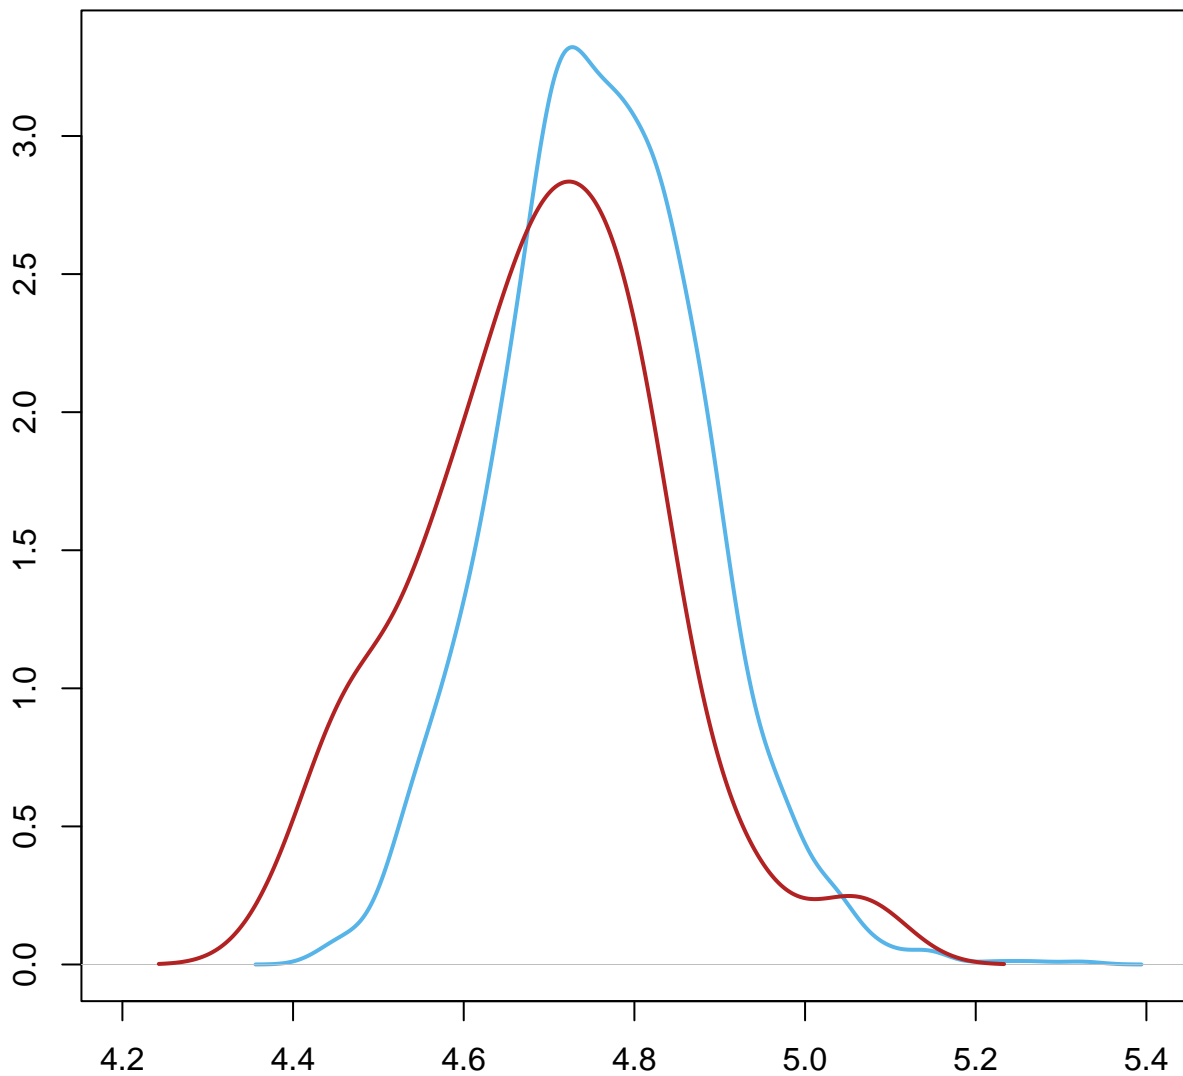

ln\_S

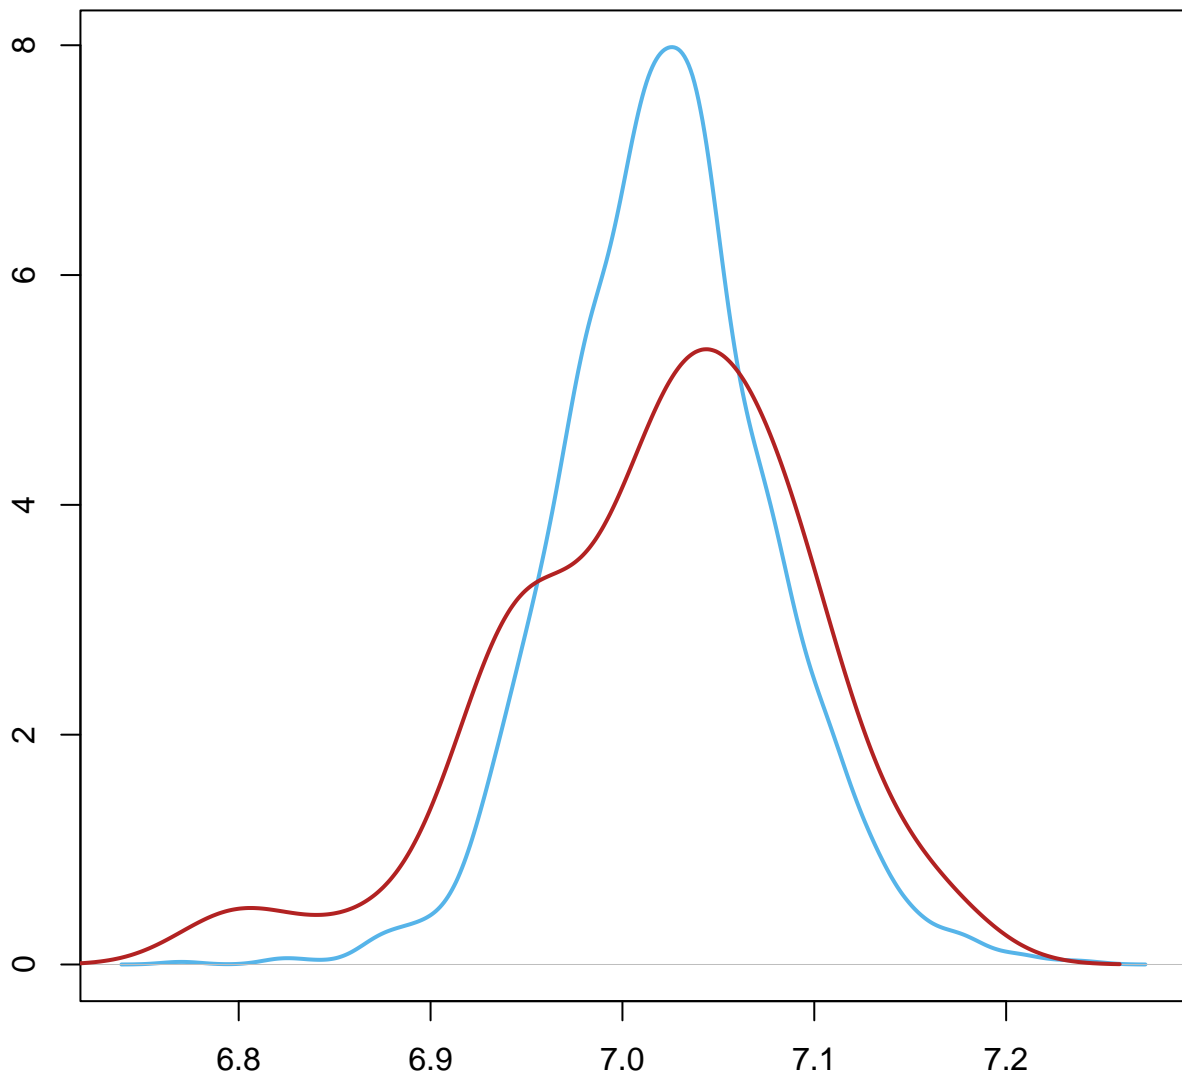

ln\_K

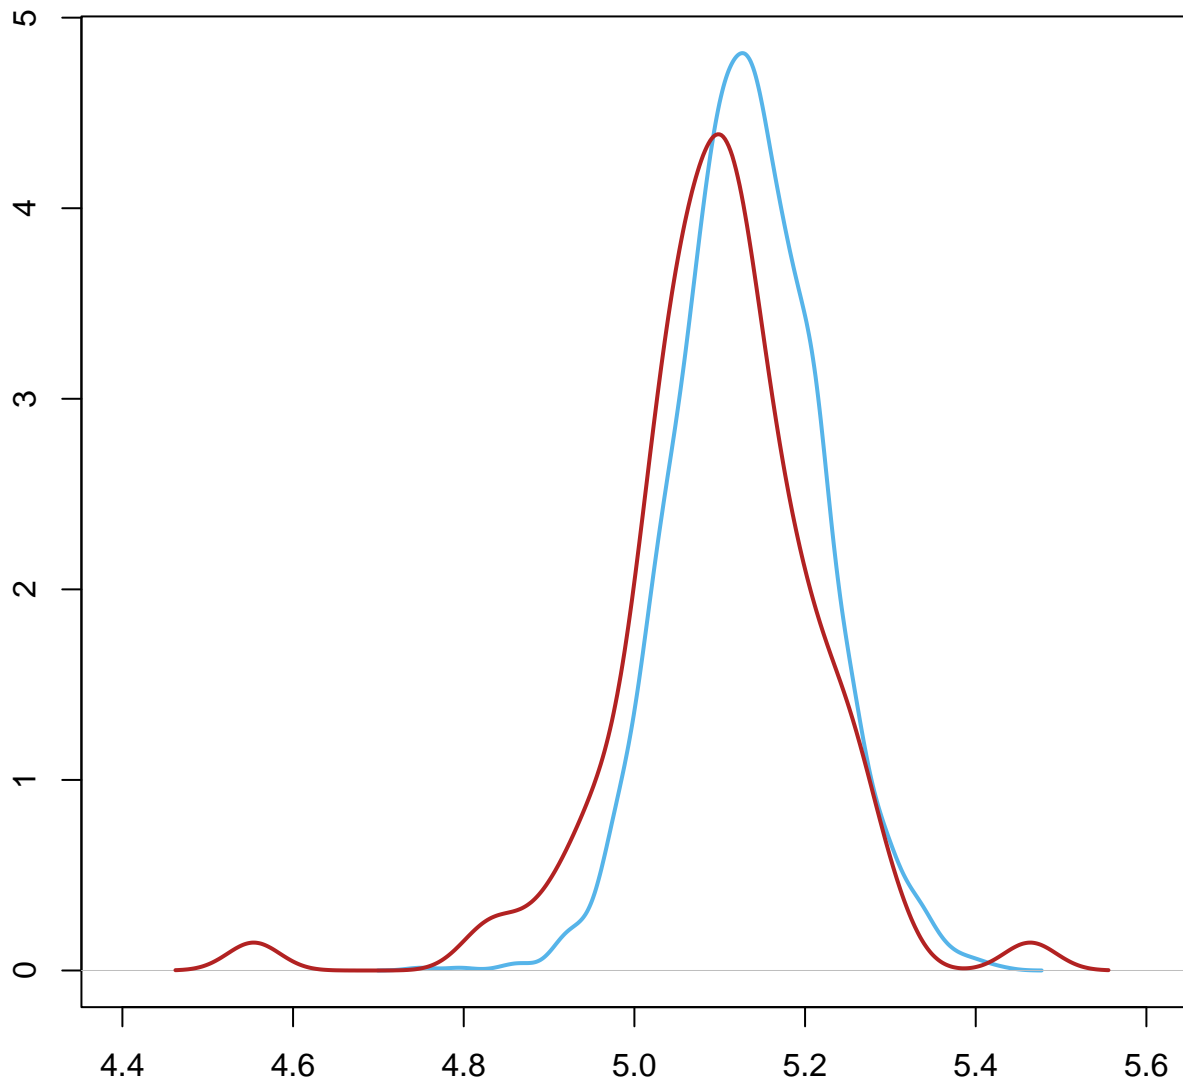

In\_Ca

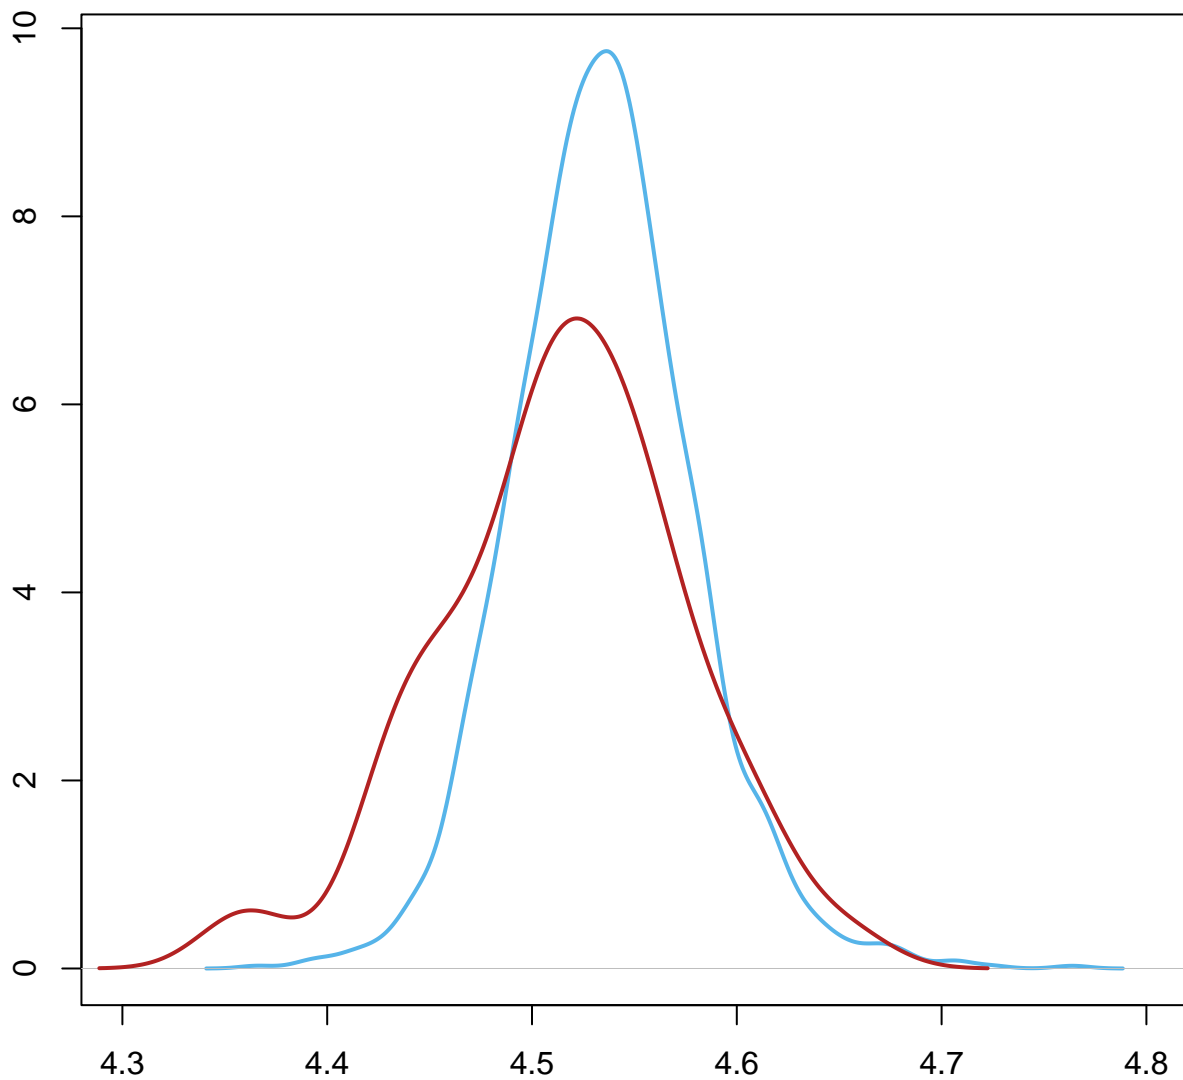

In\_Fe

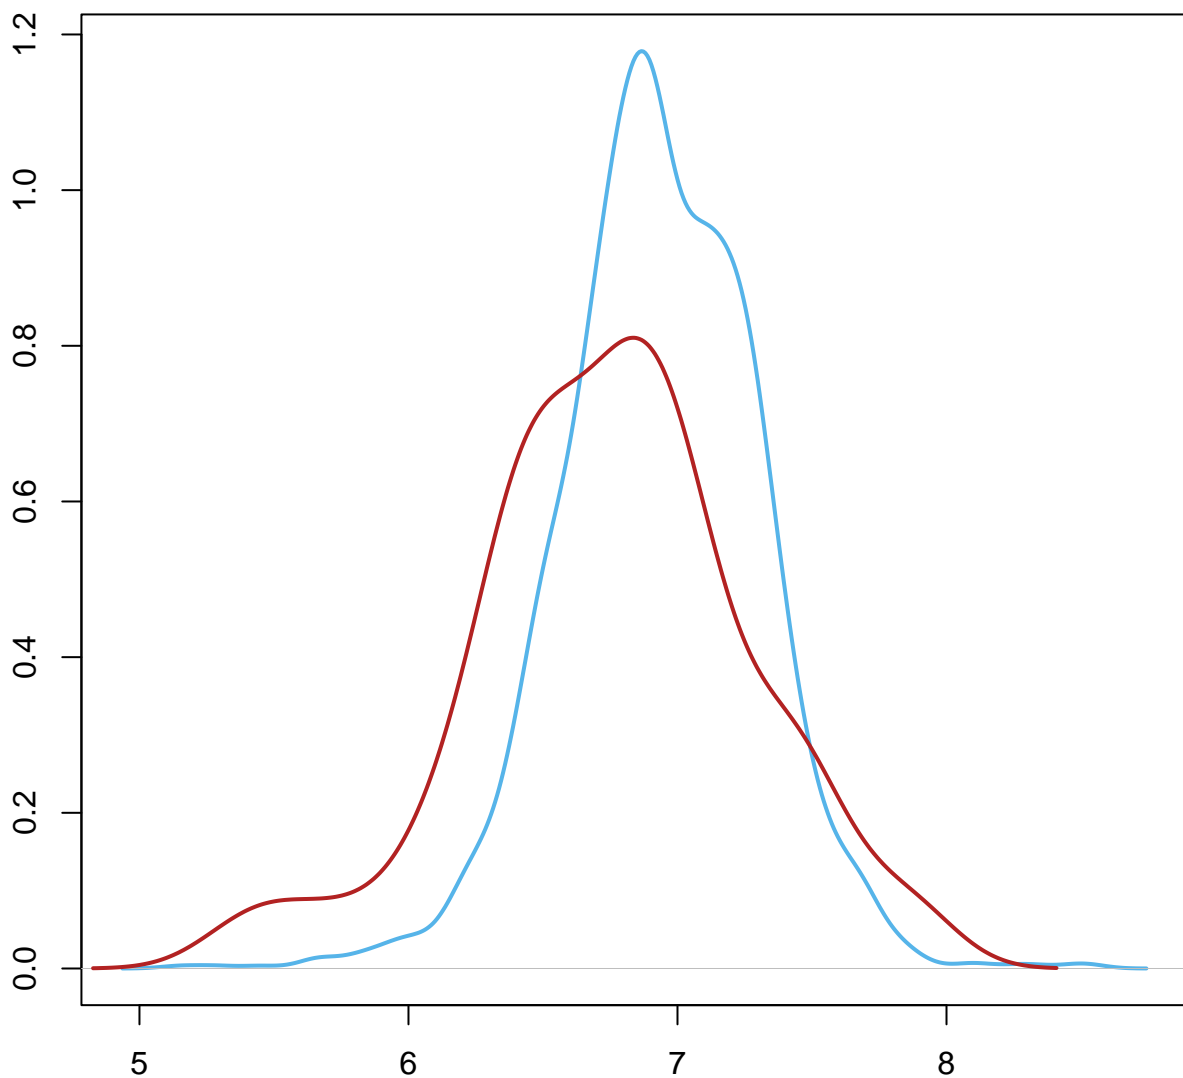

In\_Co

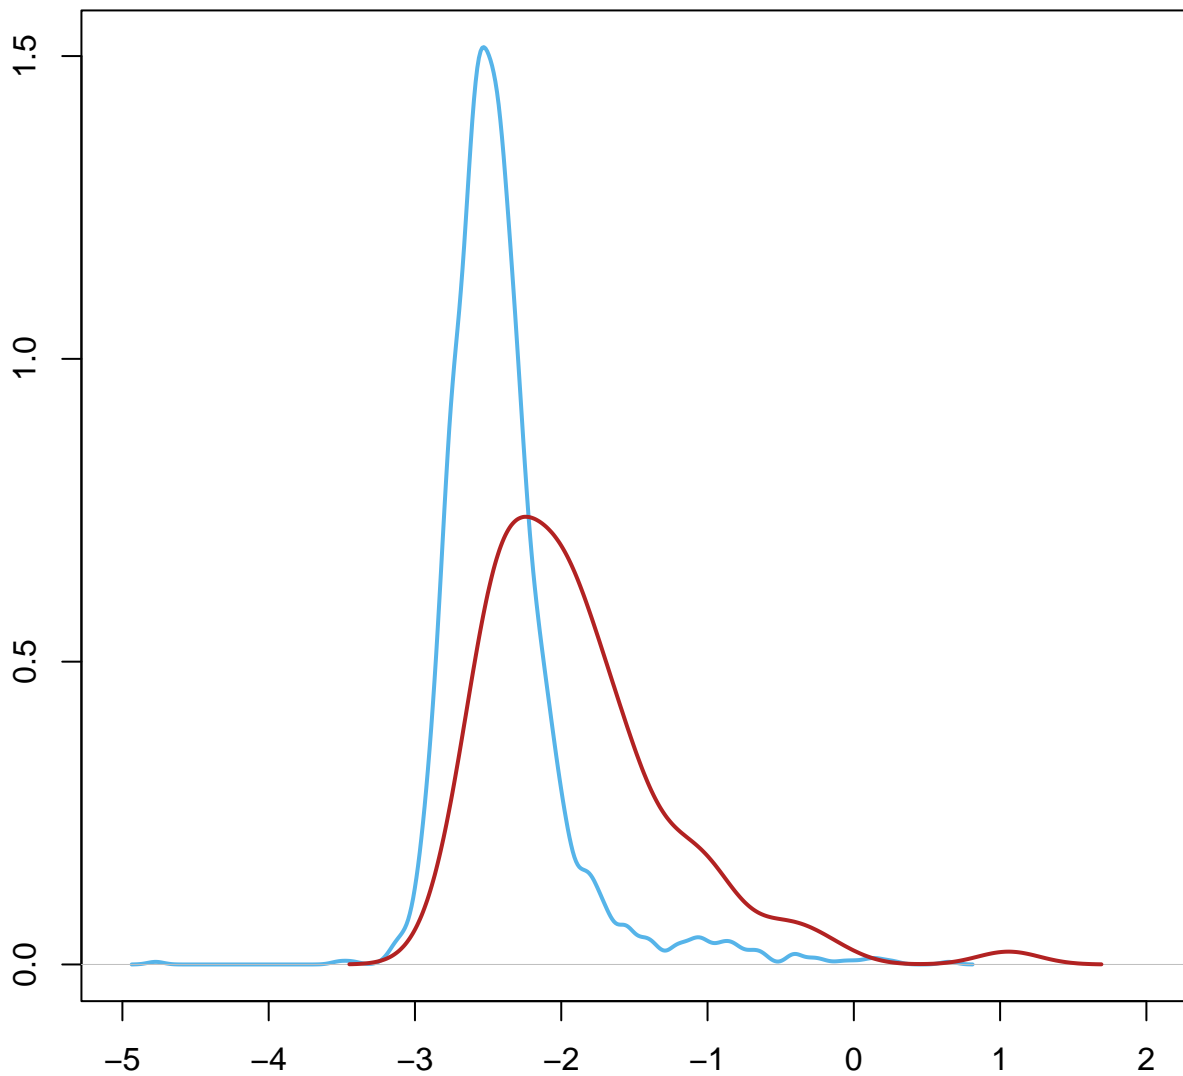



In\_Cu

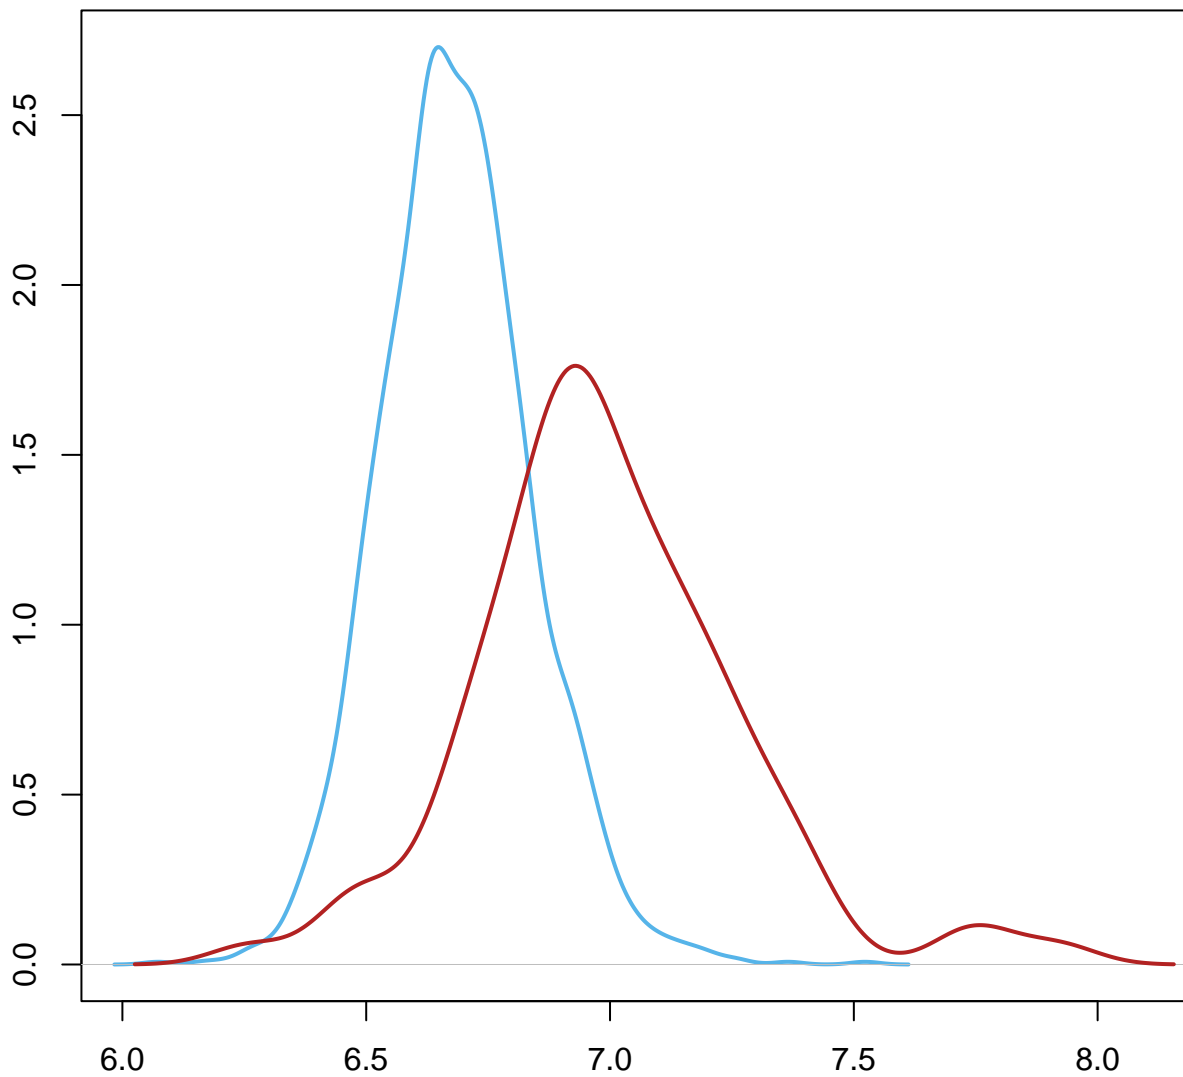

ln\_Zn

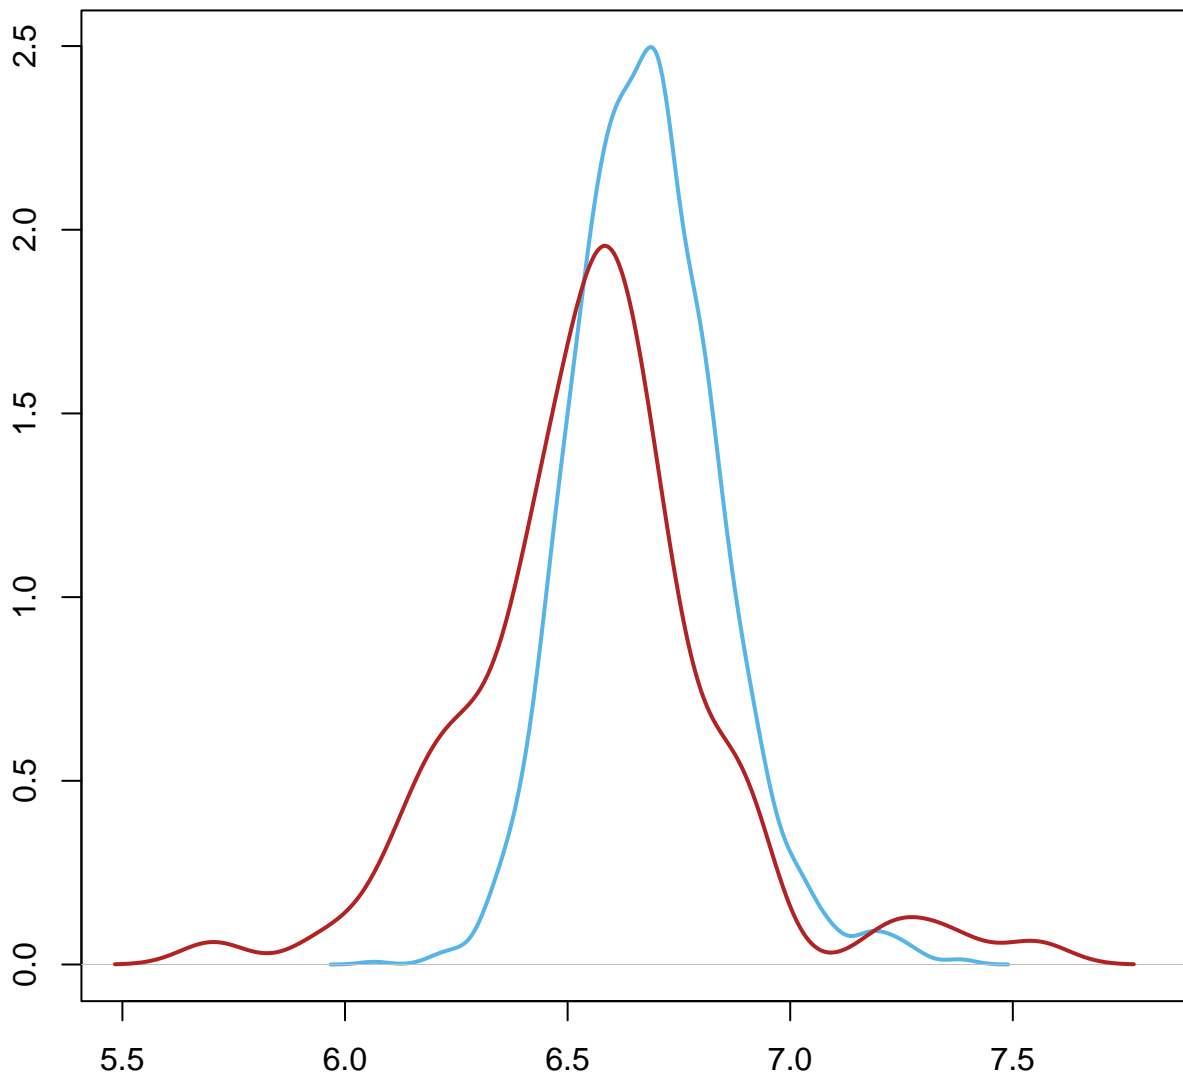

ln\_As

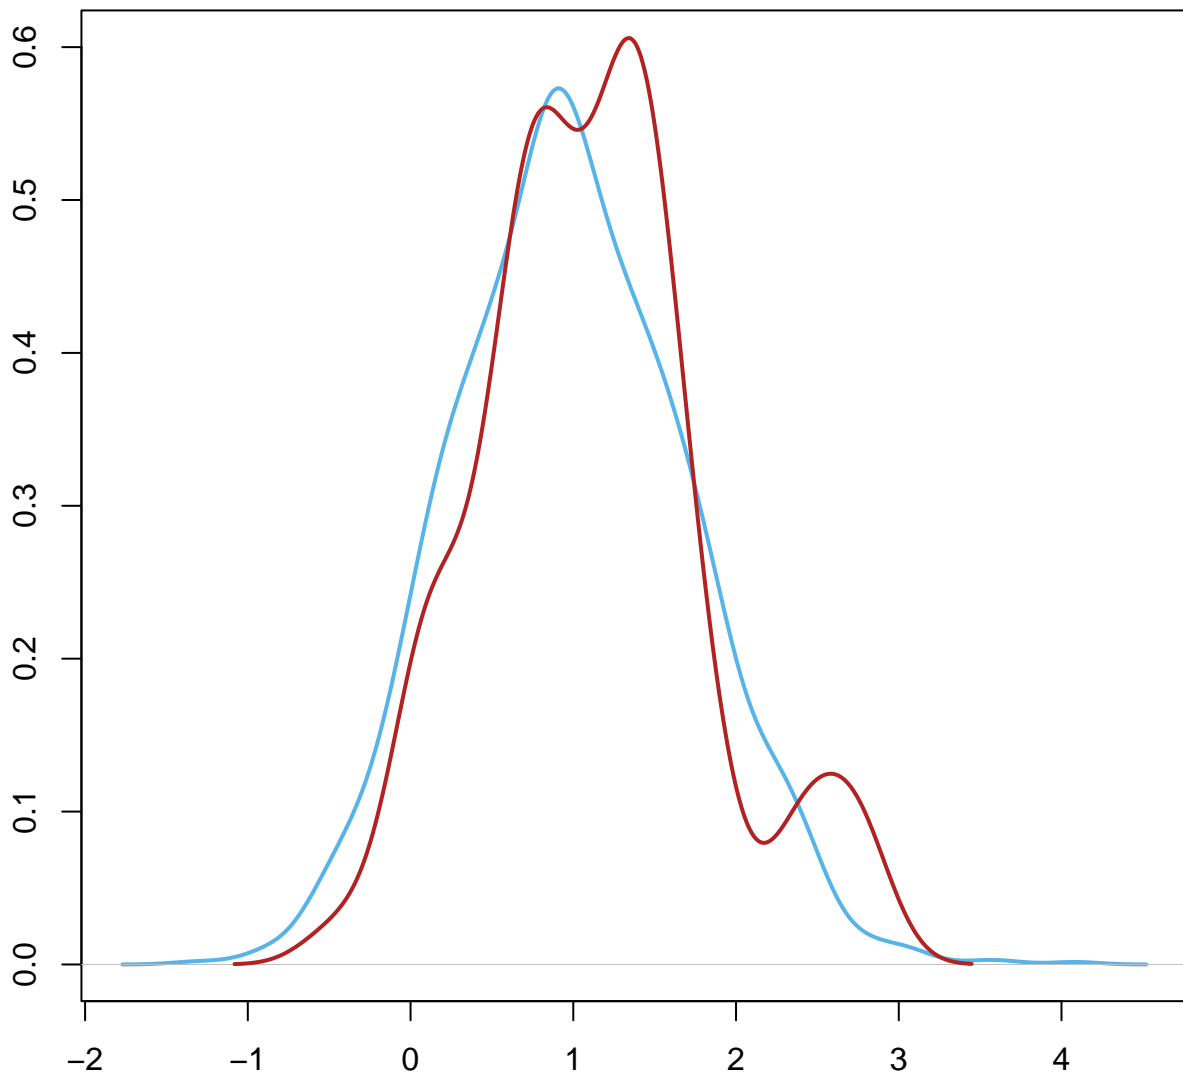

In\_Se

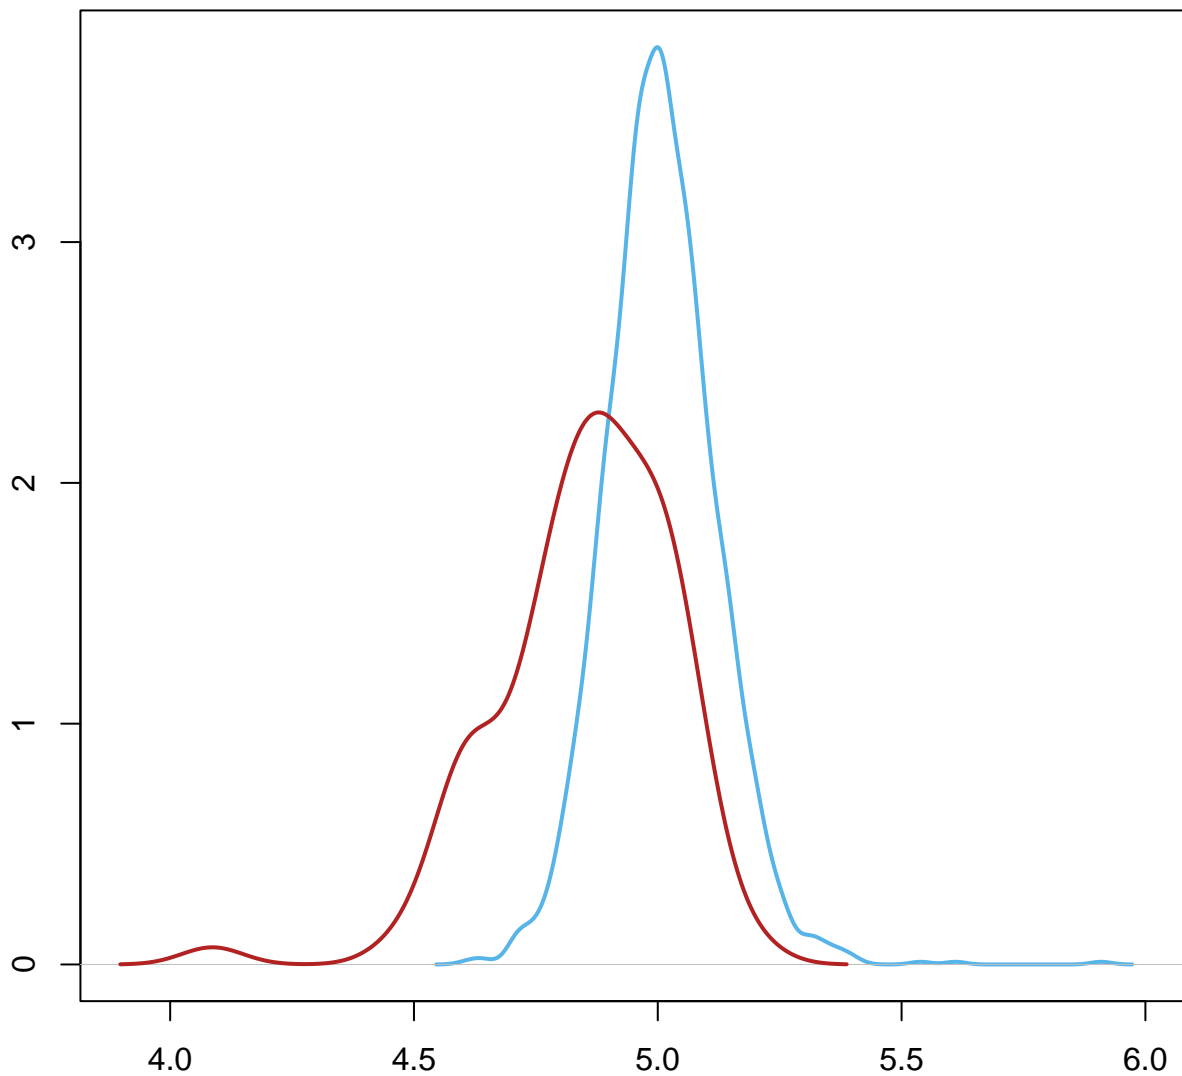

**ln\_Rb**

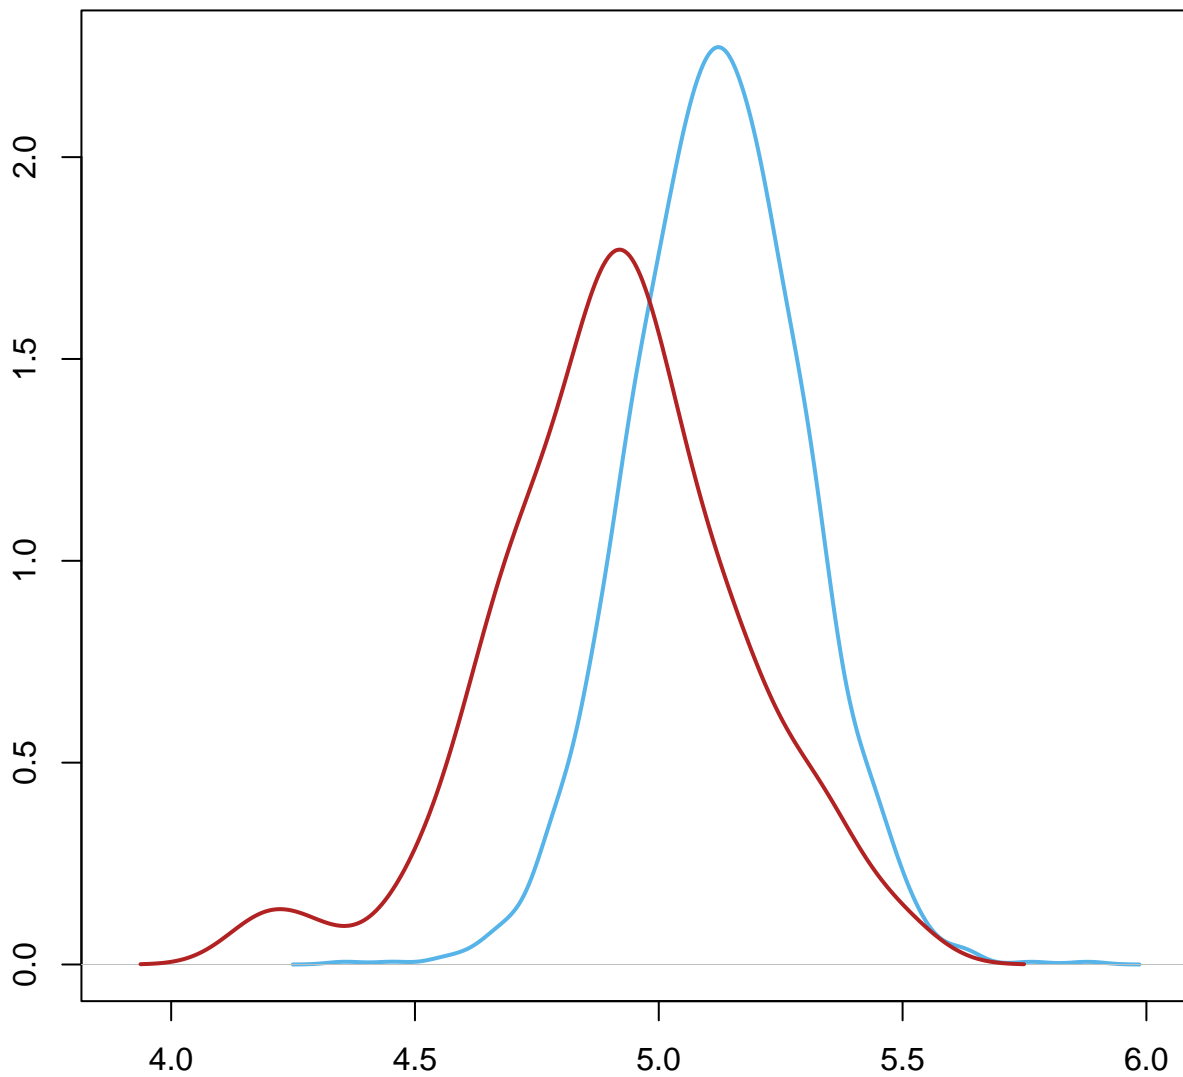

ln\_Sr

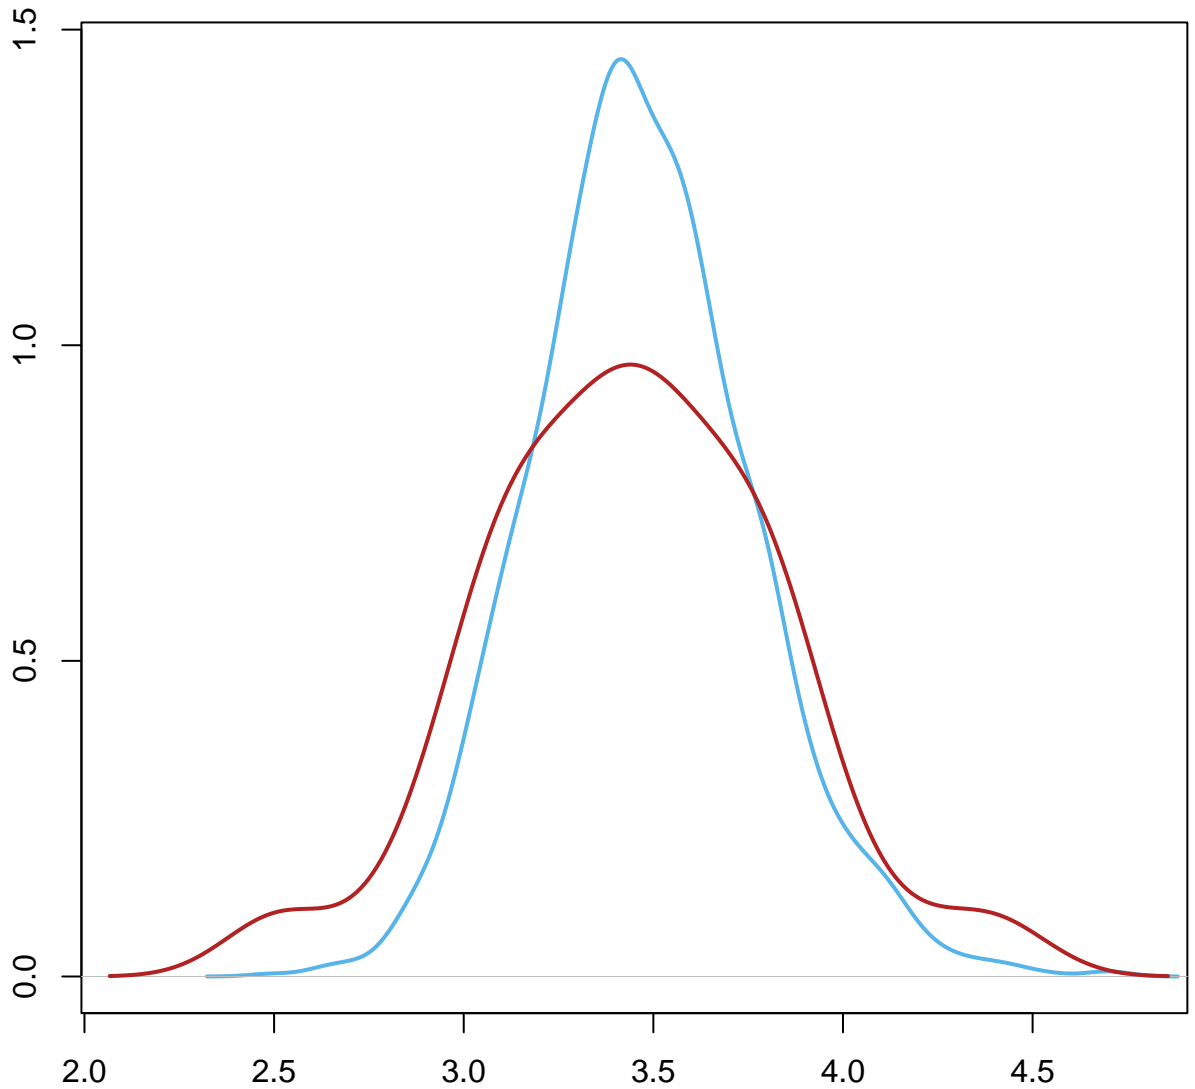

In\_Mo

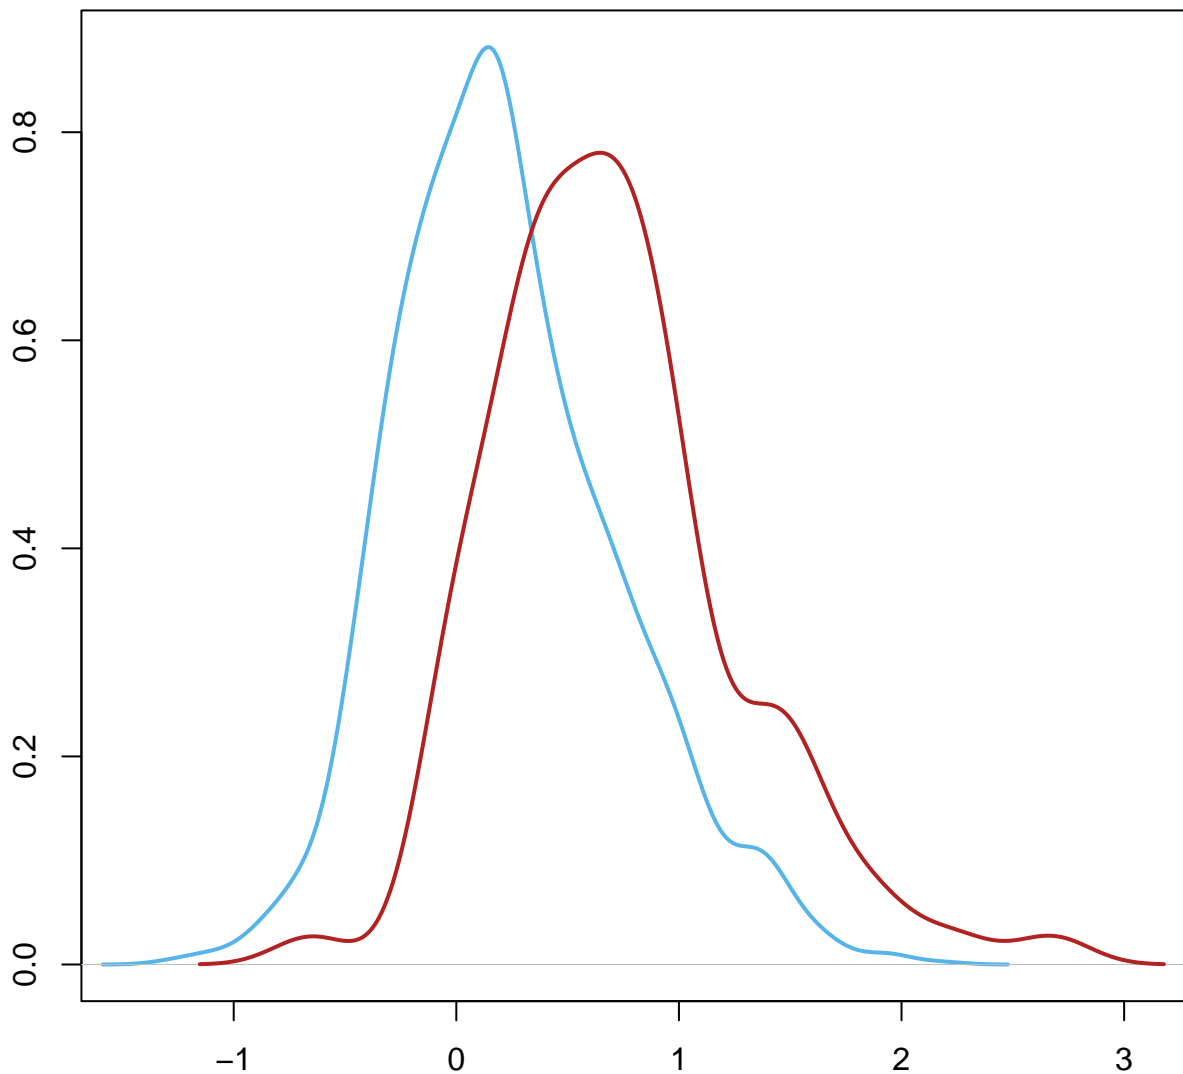

In\_Ag

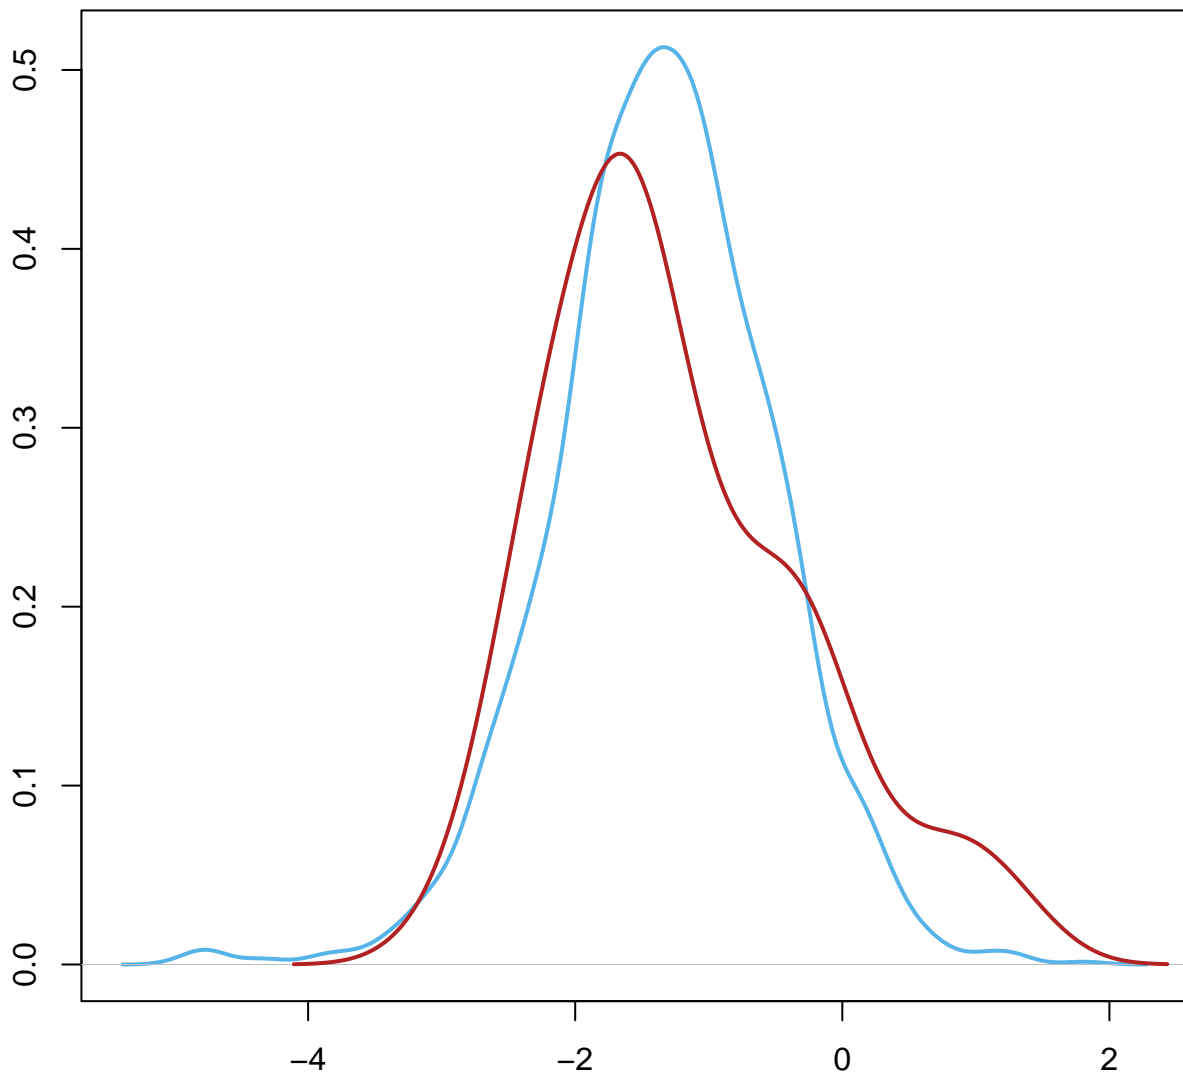



In\_Cs

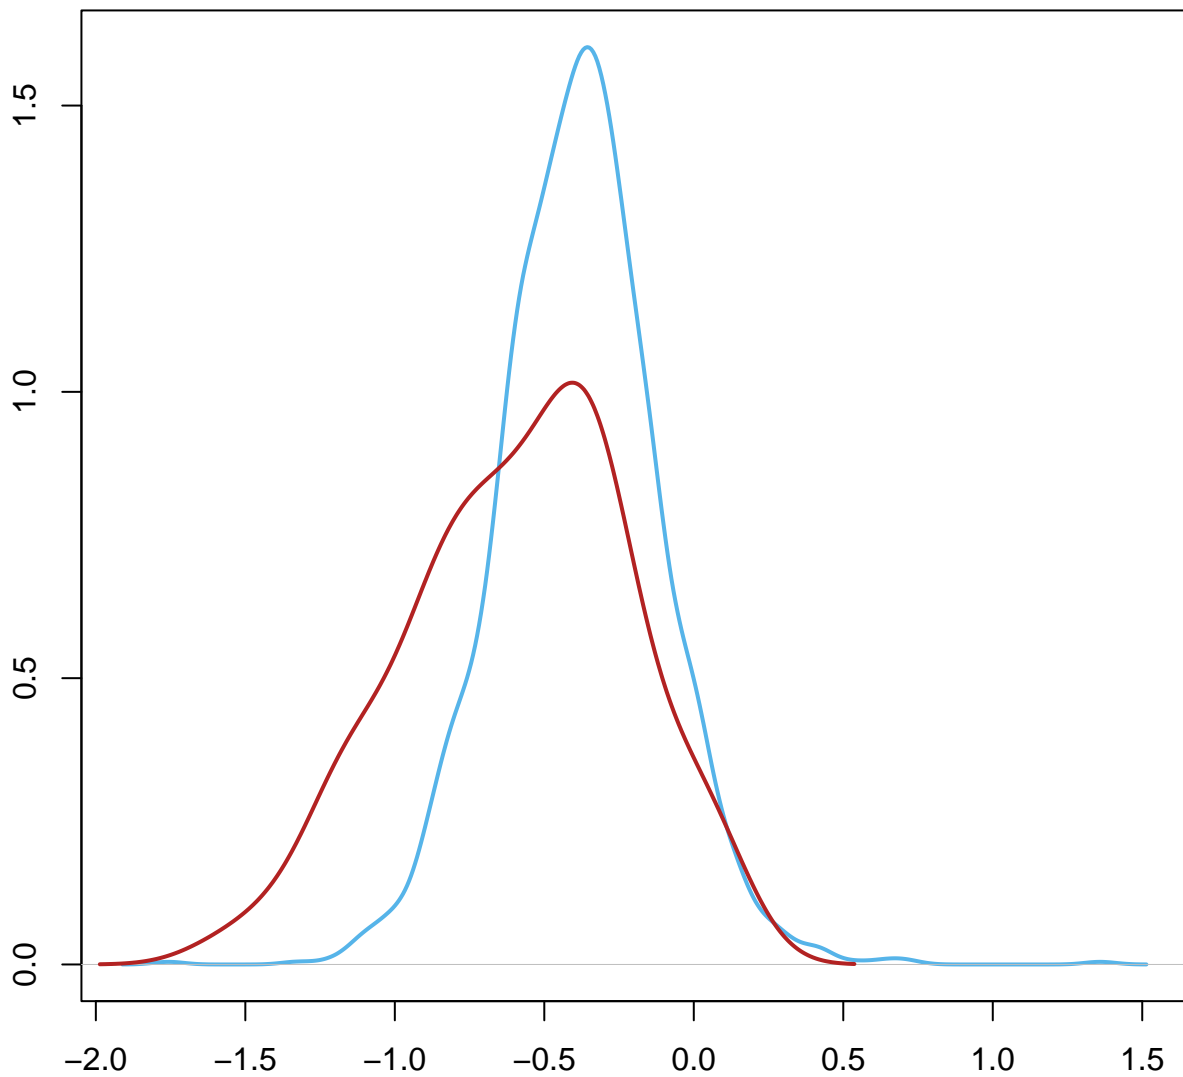

Supplement: Supporting_Figure_1.zip [file Supporting_Figure_1.zip]
